# Supplementary material for: Multiomics analysis of the molecular and single-cell responses of rice after deep-space flight on Chang'e-5
Source: Research Square preprint supplement (doi:10.21203/rs.3.rs-7211908/v1), 2025-08-22
Supplement: Supplementary file 1 [file 15340c895c3794c3bf70b917.xlsx]

## Sheet: Sheet1
Supplementary Data 4. RNA-seq DEGs.
Gene ID	CK_mean	TK_mean	log2(fc)	P_Value	FDR	Symbol	KEGG_A_class	KEGG_B_class	K_ID	Description	Pathway	GO Component	GO Function	GO Process
SK1G00072106	20.616	60.233	1.54679	6.48136e-51	1.87447e-46	DTX16	-	-	-	EEC66772.1 hypothetical protein OsI_33158 [Oryza sativa Indica Group]	-	GO:0016020//membrane	GO:0015238//drug transmembrane transporter activity;GO:0015297//antiporter activity;GO:0042910//xenobiotic transporter activity	GO:0006855//drug transmembrane transport;GO:0042493//response to drug;GO:0055085//transmembrane transport
SK1G00053841	28.728	13.693	-1.06902	4.48451e-47	6.48483e-43	NLP2	-	-	-	CAH67387.1 OSIGBa0159F11.11 [Oryza sativa]	-	-	GO:0003677//DNA binding;GO:0005515//protein binding	-
SK1G00060829	2.427	18.7897	2.95269	9.56107e-46	9.21719e-42	PCO2	-	-	-	EEC79791.1 hypothetical protein OsI_21215 [Oryza sativa Indica Group]	-	-	GO:0016702//oxidoreductase activity, acting on single donors with incorporation of molecular oxygen, incorporation of two atoms of oxygen	GO:0055114//oxidation-reduction process
MSTRG.21941	2.786	29.6937	3.41389	2.62357e-41	1.89691e-37	CRK6	-	-	-	cysteine-rich receptor-like protein kinase 6 [Oryza sativa Japonica Group]	-	GO:0043231//intracellular membrane-bounded organelle	GO:0004672//protein kinase activity	GO:0044237//cellular metabolic process
SK1G00047520	1.659	13.6783	3.04351	6.27784e-38	3.63123e-34	ATL16	-	-	-	XP_015629155.1 RING-H2 finger protein ATL57 [Oryza sativa Japonica Group]	-	GO:0000109//nucleotide-excision repair complex;GO:0005680//anaphase-promoting complex	GO:0008270//zinc ion binding;GO:0046872//metal ion binding;GO:0061630//ubiquitin protein ligase activity;GO:0097602//cullin family protein binding	GO:0006289//nucleotide-excision repair;GO:0031145//anaphase-promoting complex-dependent proteasomal ubiquitin-dependent protein catabolic process
SK1G00061405	29.981	107.985	1.84871	6.78137e-37	2.80177e-33	EREBP1	-	-	-	EAZ04715.1 hypothetical protein OsI_26876 [Oryza sativa Indica Group]	-	-	GO:0003700//transcription factor activity, sequence-specific DNA binding	GO:0006355//regulation of transcription, DNA-templated
SK1G00053145	30.283	63.6873	1.0725	3.17592e-36	1.14813e-32	--	-	-	-	EAZ30529.1 hypothetical protein OsJ_14578 [Oryza sativa Japonica Group]	-	-	GO:0015297//antiporter activity;GO:0022857//transmembrane transporter activity	GO:0055085//transmembrane transport
SK1G00050423	7.237	31.3573	2.11534	7.98032e-36	2.56443e-32	TLP1	-	-	-	KAF0934118.1 hypothetical protein E2562_022809 [Oryza meyeriana var. granulata] [Oryza meyeriana]	-	-	-	-
SK1G00057728	6.568	27.5223	2.06708	1.14888e-34	3.02063e-31	--	-	-	-	EAZ02050.1 hypothetical protein OsI_24085 [Oryza sativa Indica Group]	-	-	-	-
SK1G00040928	103.97	47.0873	-1.14276	1.2947e-34	3.12034e-31	OsI_03470	-	-	-	B8A8C9.1 RecName: Full=Phospholipase A1-II 5 [Oryza sativa Indica Group]	-	-	-	GO:0006629//lipid metabolic process
SK1G00054169	20.169	49.13	1.28446	2.13182e-34	4.74264e-31	YSL16	-	-	-	EAY95023.1 hypothetical protein OsI_16833 [Oryza sativa Indica Group]	-	GO:0005789//endoplasmic reticulum membrane;GO:0016020//membrane	GO:0015198//oligopeptide transporter activity	GO:0006857//oligopeptide transport;GO:0006888//ER to Golgi vesicle-mediated transport;GO:0055085//transmembrane transport
SK1G00053818	19.49	41.5837	1.09328	5.75332e-34	1.12213e-30	GCN2	Genetic Information Processing	Folding, sorting and degradation	K16196	KAF2934682.1 hypothetical protein DAI22_04g180900 [Oryza sativa Japonica Group]	ko04141//Protein processing in endoplasmic reticulum	GO:0005737//cytoplasm;GO:0031411//gas vesicle	GO:0003879//ATP phosphoribosyltransferase activity;GO:0004672//protein kinase activity;GO:0004821//histidine-tRNA ligase activity;GO:0005515//protein binding;GO:0005524//ATP binding;GO:0030234//enzyme regulator activity	GO:0000105//histidine biosynthetic process;GO:0006427//histidyl-tRNA aminoacylation;GO:0006468//protein phosphorylation;GO:0031412//gas vesicle organization
SK1G00049008	15.666	46.9917	1.58477	8.06807e-34	1.45835e-30	PUP11	-	-	-	EEC73811.1 hypothetical protein OsI_08525 [Oryza sativa Indica Group]	-	-	-	-
SK1G00070768	8.154	95.136	3.54441	2.24772e-33	3.82391e-30	--	-	-	-	XP_015612713.1 uncharacterized protein LOC4349493 [Oryza sativa Japonica Group]	-	-	GO:0005515//protein binding	-
SK1G00053526	50.62	166.481	1.71758	3.97848e-33	6.39231e-30	UGT85A24	-	-	-	CAH67108.1 H0818E04.25 [Oryza sativa]	-	-	GO:0008194//UDP-glycosyltransferase activity	-
SK1G00071592	12.832	42.333	1.72204	5.97319e-33	9.09214e-30	AIRP2	-	-	-	XP_015612824.1 E3 ubiquitin-protein ligase AIRP2 isoform X2 [Oryza sativa Japonica Group]	-	GO:0000109//nucleotide-excision repair complex;GO:0005680//anaphase-promoting complex;GO:0032040//small-subunit processome	GO:0008270//zinc ion binding;GO:0046872//metal ion binding;GO:0061630//ubiquitin protein ligase activity;GO:0097602//cullin family protein binding	GO:0006289//nucleotide-excision repair;GO:0006364//rRNA processing;GO:0031145//anaphase-promoting complex-dependent proteasomal ubiquitin-dependent protein catabolic process
SK1G00060568	35.026	16.2567	-1.10739	1.31888e-32	1.73379e-29	NSL1	-	-	-	KAB8100538.1 hypothetical protein EE612_031097 [Oryza sativa]	-	-	-	-
SK1G00042990	25.936	11.1017	-1.22418	1.78139e-31	2.23998e-28	--	-	-	-	EAY73189.1 hypothetical protein OsI_01062 [Oryza sativa Indica Group]	-	GO:0000775//chromosome, centromeric region;GO:0005634//nucleus;GO:0032040//small-subunit processome	GO:0003677//DNA binding;GO:0003682//chromatin binding;GO:0009055//electron carrier activity;GO:0015035//protein disulfide oxidoreductase activity;GO:0015036//disulfide oxidoreductase activity	GO:0006302//double-strand break repair;GO:0006310//DNA recombination;GO:0006367//transcription initiation from RNA polymerase II promoter;GO:0032968//positive regulation of transcription elongation from RNA polymerase II promoter;GO:0055114//oxidation-reduction process
SK1G00043691	18.595	52.3803	1.49411	1.93296e-31	2.3293e-28	MTP7	-	-	-	XP_015621370.1 metal tolerance protein 7 isoform X1 [Oryza sativa Japonica Group]	-	GO:0016020//membrane;GO:0016021//integral component of membrane	GO:0008324//cation transmembrane transporter activity;GO:0015562//efflux transmembrane transporter activity	GO:0006812//cation transport;GO:0055085//transmembrane transport
SK1G00053375	1.42	5.77867	2.02485	3.61313e-31	4.01905e-28	SBT1.7	-	-	-	XP_015635008.1 subtilisin-like protease SBT1.7 [Oryza sativa Japonica Group]	-	-	GO:0005355//glucose transmembrane transporter activity;GO:0008236//serine-type peptidase activity	GO:0006508//proteolysis;GO:0009306//protein secretion
SK1G00056458	25.31	70.9713	1.48753	3.95025e-31	4.2313e-28	SD25	-	-	-	EEE65757.1 hypothetical protein OsJ_21426 [Oryza sativa Japonica Group]	-	-	GO:0004672//protein kinase activity;GO:0005524//ATP binding	GO:0006468//protein phosphorylation;GO:0048544//recognition of pollen
SK1G00057771	12.974	51.0133	1.97525	1.15473e-30	1.15159e-27	ARF19	-	-	-	EEC81270.1 hypothetical protein OsI_24368 [Oryza sativa Indica Group]	-	GO:0005634//nucleus	GO:0003677//DNA binding	GO:0006355//regulation of transcription, DNA-templated;GO:0009725//response to hormone
SK1G00045984	20.468	80.387	1.97359	1.26105e-30	1.2157e-27	ZIP2	-	-	-	XP_015628224.1 zinc transporter 2 [Oryza sativa Japonica Group]	-	GO:0016020//membrane	GO:0046873//metal ion transmembrane transporter activity	GO:0030001//metal ion transport;GO:0055085//transmembrane transport
SK1G00045758	5.922	21.6977	1.87338	2.44631e-30	2.28225e-27	FAX5	-	-	-	EAZ27528.1 hypothetical protein OsJ_11482 [Oryza sativa Japonica Group]	-	GO:0016020//membrane	-	-
SK1G00074881	13.277	30.9287	1.22002	3.05544e-30	2.76145e-27	TULP7	-	-	-	CAB53492.1 CAA303719.1 protein [Oryza sativa]	-	-	GO:0005515//protein binding	-
SK1G00054343	9.182	118.935	3.69522	4.29884e-30	3.65667e-27	DLO1	-	-	-	CAH67943.1 H0303A11-B0406H05.3 [Oryza sativa]	-	-	GO:0016491//oxidoreductase activity	GO:0055114//oxidation-reduction process
SK1G00052997	0.572	4.79833	3.06845	1.34274e-29	1.08435e-26	WAK2	-	-	-	BAS88786.1 Os04g0366000 [Oryza sativa Japonica Group]	-	-	GO:0004672//protein kinase activity;GO:0005509//calcium ion binding;GO:0005524//ATP binding	GO:0006468//protein phosphorylation
SK1G00061833	8.086	29.6517	1.87462	1.69198e-29	1.32253e-26	CRK6	-	-	-	XP_015646485.1 cysteine-rich receptor-like protein kinase 6 isoform X1 [Oryza sativa Japonica Group]	-	-	GO:0004672//protein kinase activity;GO:0005524//ATP binding	GO:0006468//protein phosphorylation
SK1G00063646	6.347	59.6933	3.23342	1.77077e-29	1.3477e-26	SLC1	-	-	-	EAZ08009.1 hypothetical protein OsI_30274 [Oryza sativa Indica Group]	-	-	GO:0016491//oxidoreductase activity	GO:0055114//oxidation-reduction process
SK1G00074409	248.223	687.477	1.46968	1.95558e-29	1.45019e-26	Os09g0533400	-	-	-	XP_015611598.1 lon protease homolog 2, peroxisomal isoform X2 [Oryza sativa Japonica Group]	-	GO:0005575//cellular_component;GO:0009360//DNA polymerase III complex;GO:0009368//endopeptidase Clp complex;GO:0009379//Holliday junction helicase complex;GO:0033104//type VI protein secretion system complex	GO:0003674//molecular_function;GO:0003723//RNA binding;GO:0003724//RNA helicase activity;GO:0003887//DNA-directed DNA polymerase activity;GO:0003924//GTPase activity;GO:0004127//cytidylate kinase activity;GO:0004176//ATP-dependent peptidase activity;GO:0004222//metalloendopeptidase activity;GO:0004252//serine-type endopeptidase activity;GO:0005198//structural molecule activity;GO:0005524//ATP bin…	GO:0006260//DNA replication;GO:0006281//DNA repair;GO:0006310//DNA recombination;GO:0006457//protein folding;GO:0006508//proteolysis;GO:0008150//biological_process;GO:0009306//protein secretion;GO:0015949//nucleobase-containing small molecule interconversion;GO:0030436//asexual sporulation;GO:0031412//gas vesicle organization;GO:0033103//protein secretion by the type VI secretion system;GO:004333…
SK1G00067900	19.338	127.691	2.72314	2.1141e-29	1.52855e-26	ADH1	Metabolism;Metabolism;Metabolism;Metabolism;Metabolism;Metabolism	Global and overview maps;Global and overview maps;Carbohydrate metabolism;Lipid metabolism;Lipid metabolism;Amino acid metabolism	K18857;K18857;K18857;K18857;K18857;K18857	XP_015616853.1 alcohol dehydrogenase 1 isoform X2 [Oryza sativa Japonica Group]	ko01100//Metabolic pathways;ko01110//Biosynthesis of secondary metabolites;ko00010//Glycolysis / Gluconeogenesis;ko00592//alpha-Linolenic acid metabolism;ko00071//Fatty acid degradation;ko00350//Tyrosine metabolism	-	GO:0004024//alcohol dehydrogenase activity, zinc-dependent;GO:0008270//zinc ion binding;GO:0008743//L-threonine 3-dehydrogenase activity;GO:0016491//oxidoreductase activity;GO:0016616//oxidoreductase activity, acting on the CH-OH group of donors, NAD or NADP as acceptor;GO:0016655//oxidoreductase activity, acting on NAD(P)H, quinone or similar compound as acceptor;GO:0018467//formaldehyde dehydro…	GO:0006113//fermentation;GO:0006567//threonine catabolic process;GO:0006813//potassium ion transport;GO:0008152//metabolic process;GO:0009404//toxin metabolic process;GO:0010127//mycothiol-dependent detoxification;GO:0019439//aromatic compound catabolic process;GO:0030494//bacteriochlorophyll biosynthetic process;GO:0046292//formaldehyde metabolic process;GO:0055114//oxidation-reduction process
SK1G00046751	33.071	129.297	1.96705	3.0898e-29	2.17952e-26	PDC2	Metabolism;Metabolism;Metabolism	Global and overview maps;Global and overview maps;Carbohydrate metabolism	K01568;K01568;K01568	A2XFI3.2 RecName: Full=Pyruvate decarboxylase 2; Short=PDC [Oryza sativa Indica Group]	ko01100//Metabolic pathways;ko01110//Biosynthesis of secondary metabolites;ko00010//Glycolysis / Gluconeogenesis	GO:0005948//acetolactate synthase complex	GO:0000287//magnesium ion binding;GO:0003824//catalytic activity;GO:0003984//acetolactate synthase activity;GO:0008949//oxalyl-CoA decarboxylase activity;GO:0009028//tartronate-semialdehyde synthase activity;GO:0016823//hydrolase activity, acting on acid carbon-carbon bonds, in ketonic substances;GO:0030976//thiamine pyrophosphate binding;GO:0033980//phosphonopyruvate decarboxylase activity;GO:00…	GO:0006113//fermentation;GO:0009097//isoleucine biosynthetic process;GO:0009099//valine biosynthetic process;GO:0009234//menaquinone biosynthetic process;GO:0009444//pyruvate oxidation;GO:0009636//response to toxic substance;GO:0009684//indoleacetic acid biosynthetic process;GO:0017000//antibiotic biosynthetic process;GO:0019310//inositol catabolic process;GO:0019529//taurine catabolic process;GO…
SK1G00040206	3.771	15.0947	2.00102	4.67349e-29	3.14331e-26	PRA1B2	-	-	-	EAY76346.1 hypothetical protein OsI_04281 [Oryza sativa Indica Group]	-	GO:0005886//plasma membrane	-	-
SK1G00063816	6.935	28.7687	2.05253	8.48181e-29	5.57506e-26	COL14	-	-	-	KAB8109371.1 hypothetical protein EE612_045614 [Oryza sativa]	-	-	GO:0005515//protein binding;GO:0008270//zinc ion binding	-
MSTRG.16449	0.336	3.087	3.19967	1.26749e-28	8.146e-26	--	-	-	-	B1160F02.13 [Oryza sativa Japonica Group]	-	-	-	-
SK1G00053270	13.116	54.3097	2.04988	1.42261e-28	8.9442e-26	--	-	-	-	CAH67159.1 H0717B12.6 [Oryza sativa]	-	-	GO:0003674//molecular_function;GO:0016787//hydrolase activity;GO:0047570//3-oxoadipate enol-lactonase activity;GO:0070205//2-succinyl-6-hydroxy-2,4-cyclohexadiene-1-carboxylate synthase activity	GO:0009234//menaquinone biosynthetic process;GO:0015979//photosynthesis;GO:0042952//beta-ketoadipate pathway
SK1G00065504	13.486	204.674	3.92379	2.38064e-28	1.4649e-25	At1g56130	-	-	-	EEC78008.1 hypothetical protein OsI_17411 [Oryza sativa Indica Group]	-	GO:0016020//membrane	GO:0004672//protein kinase activity;GO:0005515//protein binding;GO:0005524//ATP binding	GO:0006468//protein phosphorylation;GO:0006865//amino acid transport
SK1G00047238	1.197	5.52133	2.20559	2.57782e-28	1.54904e-25	SDS	-	-	-	EEC74794.1 hypothetical protein OsI_10585 [Oryza sativa Indica Group]	-	-	-	-
SK1G00048005	10.366	3.059	-1.76073	2.62449e-28	1.54904e-25	WEL3	-	-	-	EEC74368.1 hypothetical protein OsI_09685 [Oryza sativa Indica Group]	-	-	GO:0005524//ATP binding	GO:0007059//chromosome segregation;GO:0030261//chromosome condensation
SK1G00052189	13.38	34.0987	1.34964	3.02274e-28	1.69907e-25	ETR2	Environmental Information Processing;Environmental Information Processing	Signal transduction;Signal transduction	K14509;K14509	Q8H1X1.3 RecName: Full=Ethylene receptor 2; Short=OS-ETR2; AltName: Full=OsETRL1; AltName: Full=Protein ETYLENE RESPONSE 2-LIKE 1; Short=Os-ERL1 [Oryza sativa Indica Group]	ko04075//Plant hormone signal transduction;ko04016//MAPK signaling pathway - plant	GO:0016020//membrane	GO:0000155//phosphorelay sensor kinase activity;GO:0000156//phosphorelay response regulator activity;GO:0004673//protein histidine kinase activity;GO:0005515//protein binding;GO:0005524//ATP binding	GO:0000160//phosphorelay signal transduction system;GO:0006355//regulation of transcription, DNA-templated;GO:0006796//phosphate-containing compound metabolic process;GO:0006817//phosphate ion transport;GO:0007165//signal transduction;GO:0030436//asexual sporulation;GO:0042173//regulation of sporulation resulting in formation of a cellular spore
SK1G00039321	4.297	88.7153	4.36778	3.0741e-28	1.69907e-25	Sb03g046810	Metabolism;Metabolism;Metabolism	Global and overview maps;Global and overview maps;Biosynthesis of other secondary metabolites	K00430;K00430;K00430	OAY74044.1 Cationic peroxidase SPC4 [Ananas comosus]	ko01100//Metabolic pathways;ko01110//Biosynthesis of secondary metabolites;ko00940//Phenylpropanoid biosynthesis	-	GO:0004601//peroxidase activity;GO:0020037//heme binding	GO:0006979//response to oxidative stress;GO:0055114//oxidation-reduction process
SK1G00060810	27.16	74.7157	1.45993	3.11368e-28	1.69907e-25	SIGC	-	-	-	EEC79783.1 hypothetical protein OsI_21197 [Oryza sativa Indica Group]	-	-	GO:0003677//DNA binding;GO:0003700//transcription factor activity, sequence-specific DNA binding;GO:0016987//sigma factor activity	GO:0006352//DNA-templated transcription, initiation;GO:0006355//regulation of transcription, DNA-templated;GO:0006950//response to stress;GO:0030436//asexual sporulation;GO:0042173//regulation of sporulation resulting in formation of a cellular spore
SK1G00047105	11.717	40.2357	1.77987	3.5068e-28	1.844e-25	ADF5	-	-	-	XP_015631622.1 actin-depolymerizing factor 5 [Oryza sativa Japonica Group]	-	-	GO:0003779//actin binding	-
SK1G00072693	6.394	39.919	2.64228	5.46676e-28	2.77376e-25	GT4	-	-	-	KAB8111924.1 hypothetical protein EE612_049787 [Oryza sativa]	-	-	GO:0008194//UDP-glycosyltransferase activity;GO:0016758//transferase activity, transferring hexosyl groups	-
SK1G00070837	27.34	110.901	2.02019	5.77562e-28	2.87994e-25	NPF6.3	-	-	-	XP_015614015.1 protein NRT1/ PTR FAMILY 6.3 [Oryza sativa Japonica Group]	-	GO:0016020//membrane	GO:0015333//peptide:proton symporter activity;GO:0022857//transmembrane transporter activity	GO:0015833//peptide transport;GO:0055085//transmembrane transport
SK1G00053795	34.559	11.3897	-1.60134	8.47096e-28	4.08314e-25	OXI1	Environmental Information Processing	Signal transduction	K20714	XP_015633586.1 serine/threonine-protein kinase OXI1 [Oryza sativa Japonica Group]	ko04016//MAPK signaling pathway - plant	-	GO:0004672//protein kinase activity;GO:0005524//ATP binding	GO:0006468//protein phosphorylation
SK1G00050703	21.865	10.443	-1.06609	1.43018e-27	6.67131e-25	At2g20050/At2g20040	-	-	-	XP_015626814.1 protein phosphatase 2C and cyclic nucleotide-binding/kinase domain-containing protein isoform X1 [Oryza sativa Japonica Group]	-	-	GO:0004672//protein kinase activity;GO:0005524//ATP binding;GO:0016791//phosphatase activity	GO:0006468//protein phosphorylation
SK1G00066223	2.755	7.08667	1.36305	1.60591e-27	7.37217e-25	RGA4	-	-	-	BBD82515.1 putative stripe rust resistance protein [Oryza sativa Indica Group]	-	GO:0005887//integral component of plasma membrane;GO:0055051//ATP-binding cassette (ABC) transporter complex, integrated substrate binding	GO:0003677//DNA binding;GO:0005515//protein binding;GO:0005524//ATP binding;GO:0016887//ATPase activity;GO:0033230//cysteine-transporting ATPase activity;GO:0043531//ADP binding	GO:0033228//cysteine export
SK1G00052907	1.347	38.2073	4.82603	1.87016e-27	8.45108e-25	TPS8	Metabolism	Metabolism of terpenoids and polyketides	K15803	XP_015634270.1 alpha-humulene synthase isoform X1 [Oryza sativa Japonica Group]	ko00909//Sesquiterpenoid and triterpenoid biosynthesis	-	GO:0000287//magnesium ion binding;GO:0010333//terpene synthase activity;GO:0016829//lyase activity	-
MSTRG.7827	0.243	1.94433	3.00025	2.91772e-27	1.2982e-24	--	-	-	-	hypothetical protein [Oryza sativa Japonica Group]	-	-	-	-
SK1G00061840	8.335	24.1037	1.532	3.03472e-27	1.32079e-24	CRK6	-	-	-	EEC82203.1 hypothetical protein OsI_26346 [Oryza sativa Indica Group]	-	-	GO:0004672//protein kinase activity;GO:0004674//protein serine/threonine kinase activity;GO:0005524//ATP binding	GO:0006468//protein phosphorylation
SK1G00059806	6.436	18.4253	1.51745	3.05982e-27	1.32079e-24	ASE1	Metabolism;Metabolism;Metabolism;Metabolism	Global and overview maps;Global and overview maps;Nucleotide metabolism;Amino acid metabolism	K00764;K00764;K00764;K00764	EAY98151.1 hypothetical protein OsI_20066 [Oryza sativa Indica Group]	ko01100//Metabolic pathways;ko01110//Biosynthesis of secondary metabolites;ko00230//Purine metabolism;ko00250//Alanine, aspartate and glutamate metabolism	-	GO:0004044//amidophosphoribosyltransferase activity;GO:0004066//asparagine synthase (glutamine-hydrolyzing) activity;GO:0004360//glutamine-fructose-6-phosphate transaminase (isomerizing) activity;GO:0004749//ribose phosphate diphosphokinase activity	GO:0006040//amino sugar metabolic process;GO:0006529//asparagine biosynthetic process;GO:0009116//nucleoside metabolic process;GO:0009152//purine ribonucleotide biosynthetic process;GO:0009252//peptidoglycan biosynthetic process;GO:0052699//ergothioneine biosynthetic process
SK1G00054364	25.854	9.399	-1.45981	3.39514e-27	1.42306e-24	CA2	Metabolism;Metabolism;Metabolism	Global and overview maps;Global and overview maps;Metabolism of terpenoids and polyketides	K15746;K15746;K15746	XP_015634148.1 beta-carotene hydroxylase 2, chloroplastic [Oryza sativa Japonica Group]	ko01100//Metabolic pathways;ko01110//Biosynthesis of secondary metabolites;ko00906//Carotenoid biosynthesis	-	GO:0005506//iron ion binding;GO:0016491//oxidoreductase activity	GO:0008610//lipid biosynthetic process;GO:0055114//oxidation-reduction process
SK1G00074281	35.02	71.5637	1.03105	3.94103e-27	1.62826e-24	--	-	-	-	XP_015611764.1 E3 ubiquitin-protein ligase RNF4 [Oryza sativa Japonica Group]	-	GO:0000109//nucleotide-excision repair complex;GO:0005675//holo TFIIH complex;GO:0005680//anaphase-promoting complex	GO:0003723//RNA binding;GO:0004693//cyclin-dependent protein serine/threonine kinase activity;GO:0008270//zinc ion binding;GO:0046872//metal ion binding;GO:0061630//ubiquitin protein ligase activity;GO:0097602//cullin family protein binding	GO:0006289//nucleotide-excision repair;GO:0006352//DNA-templated transcription, initiation;GO:0031145//anaphase-promoting complex-dependent proteasomal ubiquitin-dependent protein catabolic process
SK1G00067946	10.937	23.3003	1.09113	4.90119e-27	1.96871e-24	PERK13	-	-	-	XP_015618013.1 probable receptor-like serine/threonine-protein kinase At5g57670 isoform X2 [Oryza sativa Japonica Group]	-	-	GO:0004672//protein kinase activity;GO:0005524//ATP binding	GO:0006468//protein phosphorylation
SK1G00061471	57.539	167.061	1.53776	6.36562e-27	2.52192e-24	EDL2	-	-	-	KAB8106223.1 hypothetical protein EE612_040462 [Oryza sativa]	-	-	GO:0005515//protein binding	-
SK1G00060761	2.537	15.1863	2.58158	6.52246e-27	2.54914e-24	WRKY28	-	-	-	XP_015637709.1 WRKY transcription factor 23 isoform X2 [Oryza sativa Japonica Group]	-	-	GO:0003700//transcription factor activity, sequence-specific DNA binding;GO:0043565//sequence-specific DNA binding	GO:0006355//regulation of transcription, DNA-templated
SK1G00059617	8.091	30.07	1.89393	8.82706e-27	3.40383e-24	CYCP3-1	-	-	-	XP_015640468.1 cyclin-P3-1 [Oryza sativa Japonica Group]	-	-	GO:0019901//protein kinase binding	GO:0000079//regulation of cyclin-dependent protein serine/threonine kinase activity
SK1G00050401	36.849	74.49	1.01542	9.0021e-27	3.42565e-24	Os04g0252400	-	-	-	EEC73104.1 hypothetical protein OsI_07088 [Oryza sativa Indica Group]	-	-	-	GO:0016192//vesicle-mediated transport
MSTRG.24850	4.686	13.6053	1.53774	9.4419e-27	3.54635e-24	ROPGAP1	-	-	-	Os01g0967800, partial [Oryza sativa Japonica Group]	-	GO:0009536//plastid	-	GO:0044699//single-organism process;GO:0050794//regulation of cellular process
SK1G00054605	10.081	30.3663	1.59083	1.36097e-26	4.92006e-24	VSR7	-	-	-	CAE03573.2 OSJNBa0085I10.18 [Oryza sativa Japonica Group]	-	-	GO:0005509//calcium ion binding	-
SK1G00074344	6.404	17.9267	1.48506	1.83025e-26	6.4552e-24	PILS1	-	-	-	EEC84799.1 hypothetical protein OsI_31863 [Oryza sativa Indica Group]	-	GO:0016021//integral component of membrane	-	GO:0055085//transmembrane transport
SK1G00061841	13.216	52.9473	2.00227	2.2865e-26	7.9672e-24	At4g29360	-	-	-	EEC82204.1 hypothetical protein OsI_26347 [Oryza sativa Indica Group]	-	-	GO:0004553//hydrolase activity, hydrolyzing O-glycosyl compounds	GO:0005975//carbohydrate metabolic process
SK1G00070153	3.794	8.836	1.21967	4.01903e-26	1.36746e-23	RGA5	-	-	-	EAZ20826.1 hypothetical protein OsJ_36455 [Oryza sativa Japonica Group]	-	GO:0005576//extracellular region;GO:0005737//cytoplasm;GO:0009368//endopeptidase Clp complex;GO:0009379//Holliday junction helicase complex	GO:0003677//DNA binding;GO:0003678//DNA helicase activity;GO:0003824//catalytic activity;GO:0003924//GTPase activity;GO:0004020//adenylylsulfate kinase activity;GO:0004252//serine-type endopeptidase activity;GO:0004798//thymidylate kinase activity;GO:0004849//uridine kinase activity;GO:0005047//signal recognition particle binding;GO:0005524//ATP binding;GO:0005525//GTP binding;GO:0008289//lipid b…	GO:0000723//telomere maintenance;GO:0002949//tRNA threonylcarbamoyladenosine modification;GO:0006281//DNA repair;GO:0006310//DNA recombination;GO:0006508//proteolysis;GO:0006614//SRP-dependent cotranslational protein targeting to membrane;GO:0006777//Mo-molybdopterin cofactor biosynthetic process;GO:0006790//sulfur compound metabolic process;GO:0006810//transport;GO:0006869//lipid transport;GO:00…
SK1G00074284	7.427	18.7837	1.33863	4.33091e-26	1.4397e-23	GAE6	Metabolism;Metabolism	Global and overview maps;Carbohydrate metabolism	K08679;K08679	EEC84839.1 hypothetical protein OsI_31939 [Oryza sativa Indica Group]	ko01100//Metabolic pathways;ko00520//Amino sugar and nucleotide sugar metabolism	-	GO:0003824//catalytic activity;GO:0003854//3-beta-hydroxy-delta5-steroid dehydrogenase activity;GO:0003978//UDP-glucose 4-epimerase activity;GO:0008446//GDP-mannose 4,6-dehydratase activity;GO:0008460//dTDP-glucose 4,6-dehydratase activity;GO:0008712//ADP-glyceromanno-heptose 6-epimerase activity;GO:0008831//dTDP-4-dehydrorhamnose reductase activity;GO:0016616//oxidoreductase activity, acting on …	GO:0000271//polysaccharide biosynthetic process;GO:0005975//carbohydrate metabolic process;GO:0006012//galactose metabolic process;GO:0006694//steroid biosynthetic process;GO:0009243//O antigen biosynthetic process;GO:0009244//lipopolysaccharide core region biosynthetic process;GO:0019305//dTDP-rhamnose biosynthetic process;GO:0055114//oxidation-reduction process
SK1G00059782	70.924	208.443	1.55531	4.43842e-26	1.45868e-23	B3GALT8	-	-	-	BAS94126.1 Os05g0427200, partial [Oryza sativa Japonica Group]	-	GO:0016020//membrane	GO:0016757//transferase activity, transferring glycosyl groups;GO:0016758//transferase activity, transferring hexosyl groups	GO:0006486//protein glycosylation
SK1G00057193	1.266	3.92167	1.63119	6.07448e-26	1.97393e-23	XA21	-	-	-	KAB8102927.1 hypothetical protein EE612_035041, partial [Oryza sativa]	-	-	GO:0004413//homoserine kinase activity;GO:0004672//protein kinase activity;GO:0005515//protein binding;GO:0005524//ATP binding	GO:0006468//protein phosphorylation;GO:0009088//threonine biosynthetic process
SK1G00064011	40.993	84.483	1.04328	6.14658e-26	1.97517e-23	BHLH130	-	-	-	AAL87667.1 transcription factor RAU1, partial [Oryza sativa]	-	-	GO:0046983//protein dimerization activity	-
SK1G00058068	25.843	69.226	1.42154	9.51791e-26	2.95986e-23	RLCK176	-	-	-	EEC78387.1 hypothetical protein OsI_18165 [Oryza sativa Indica Group]	-	-	GO:0004672//protein kinase activity;GO:0005524//ATP binding	GO:0006468//protein phosphorylation
SK1G00049400	3.555	7.288	1.03567	1.17216e-25	3.58372e-23	FAO2	-	-	-	EEC73620.1 hypothetical protein OsI_08118 [Oryza sativa Indica Group]	-	GO:0009342//glutamate synthase complex (NADPH)	GO:0003824//catalytic activity;GO:0004148//dihydrolipoyl dehydrogenase activity;GO:0008677//2-dehydropantoate 2-reductase activity;GO:0008734//L-aspartate oxidase activity;GO:0008767//UDP-galactopyranose mutase activity;GO:0008812//choline dehydrogenase activity;GO:0016166//phytoene dehydrogenase activity;GO:0016491//oxidoreductase activity;GO:0016614//oxidoreductase activity, acting on CH-OH gro…	GO:0006096//glycolytic process;GO:0006537//glutamate biosynthetic process;GO:0006631//fatty acid metabolic process;GO:0009228//thiamine biosynthetic process;GO:0009273//peptidoglycan-based cell wall biogenesis;GO:0015940//pantothenate biosynthetic process;GO:0015995//chlorophyll biosynthetic process;GO:0016117//carotenoid biosynthetic process;GO:0019285//glycine betaine biosynthetic process from …
SK1G00069781	13.994	35.248	1.33273	1.17719e-25	3.58372e-23	At2g16710	-	-	-	XP_015619902.1 iron-sulfur assembly protein IscA-like 1, mitochondrial [Oryza sativa Japonica Group]	-	GO:0005887//integral component of plasma membrane;GO:0055052//ATP-binding cassette (ABC) transporter complex, substrate-binding subunit-containing	GO:0003674//molecular_function;GO:0005198//structural molecule activity;GO:0005506//iron ion binding;GO:0015413//nickel-transporting ATPase activity	GO:0015675//nickel cation transport;GO:0016226//iron-sulfur cluster assembly
SK1G00050173	8.43	23.8597	1.50097	1.31467e-25	3.91975e-23	GAUT8	Metabolism;Metabolism	Global and overview maps;Carbohydrate metabolism	K13648;K13648	EEC73220.1 hypothetical protein OsI_07307 [Oryza sativa Indica Group]	ko01100//Metabolic pathways;ko00520//Amino sugar and nucleotide sugar metabolism	-	GO:0016757//transferase activity, transferring glycosyl groups	-
SK1G00071909	2.555	7.008	1.45568	1.60254e-25	4.6416e-23	RGA4	-	-	-	ALO70159.1 NBS-LRR-like resistance protein [Oryza sativa]	-	-	GO:0043531//ADP binding	-
SK1G00062378	1.309	9.08567	2.79513	1.60492e-25	4.6416e-23	oxr1	-	-	-	XP_015645156.1 TLD domain-containing protein 2 isoform X1 [Oryza sativa Japonica Group]	-	-	-	-
SK1G00061952	9.916	20.3913	1.04013	2.06328e-25	5.90814e-23	spg1	-	-	-	XP_015646102.1 septum-promoting GTP-binding protein 1 [Oryza sativa Japonica Group]	-	-	GO:0003924//GTPase activity;GO:0005525//GTP binding	-
SK1G00061834	4.321	14.4563	1.74226	2.92558e-25	8.29517e-23	CRK6	-	-	-	XP_010237403.2 uncharacterized protein LOC100824644 [Brachypodium distachyon]	-	GO:0016020//membrane	GO:0004672//protein kinase activity;GO:0004674//protein serine/threonine kinase activity;GO:0005102//receptor binding;GO:0005524//ATP binding;GO:0043548//phosphatidylinositol 3-kinase binding	GO:0006468//protein phosphorylation;GO:0014068//positive regulation of phosphatidylinositol 3-kinase signaling;GO:0050776//regulation of immune response
SK1G00039731	94.606	238.832	1.33599	3.56701e-25	1.00157e-22	BHLH128	-	-	-	ADX60271.1 bHLH transcription factor, partial [Oryza sativa Japonica Group]	-	-	GO:0046983//protein dimerization activity	-
SK1G00057294	31.608	95.264	1.59164	4.6249e-25	1.28612e-22	EBF2	Environmental Information Processing;Environmental Information Processing	Signal transduction;Signal transduction	K14515;K14515	XP_015643083.1 EIN3-binding F-box protein 1 [Oryza sativa Japonica Group]	ko04075//Plant hormone signal transduction;ko04016//MAPK signaling pathway - plant	-	GO:0005515//protein binding	-
SK1G00071007	10.234	34.5107	1.75367	5.42137e-25	1.47916e-22	PP2C27	-	-	-	EEC67377.1 hypothetical protein OsI_34505 [Oryza sativa Indica Group]	-	-	GO:0016791//phosphatase activity	-
SK1G00069688	14.456	29.177	1.01316	7.59451e-25	2.03371e-22	SPT16	-	-	-	EAY82984.1 hypothetical protein OsI_38208 [Oryza sativa Indica Group]	-	-	-	-
SK1G00041459	16.68	7.524	-1.14855	7.9024e-25	2.09675e-22	--	-	-	-	XP_015621223.1 uncharacterized protein LOC4326628 [Oryza sativa Japonica Group]	-	-	-	-
SK1G00068224	210.447	87.6323	-1.26392	8.57824e-25	2.25537e-22	TSJT1	-	-	-	XP_015617262.1 stem-specific protein TSJT1 [Oryza sativa Japonica Group]	-	-	GO:0004044//amidophosphoribosyltransferase activity;GO:0004066//asparagine synthase (glutamine-hydrolyzing) activity;GO:0004360//glutamine-fructose-6-phosphate transaminase (isomerizing) activity	GO:0006040//amino sugar metabolic process;GO:0006529//asparagine biosynthetic process;GO:0009152//purine ribonucleotide biosynthetic process;GO:0009252//peptidoglycan biosynthetic process
SK1G00070067	1.016	3.18933	1.65035	9.77878e-25	2.54786e-22	--	-	-	-	XP_015618968.1 uncharacterized protein LOC4352431 [Oryza sativa Japonica Group]	-	-	-	-
SK1G00048911	40.542	19.6873	-1.04215	1.00801e-24	2.60292e-22	PUB5	-	-	-	EEC73858.1 hypothetical protein OsI_08623 [Oryza sativa Indica Group]	-	-	GO:0004842//ubiquitin-protein transferase activity;GO:0005515//protein binding;GO:0008270//zinc ion binding	GO:0016567//protein ubiquitination
SK1G00041327	3.831	8.93567	1.22185	1.16532e-24	2.98251e-22	MOT2	-	-	-	KAB8082670.1 hypothetical protein EE612_004643 [Oryza sativa]	-	-	GO:0015098//molybdate ion transmembrane transporter activity	GO:0015689//molybdate ion transport
SK1G00057203	3.773	18.1213	2.26391	1.48026e-24	3.75532e-22	XA21	-	-	-	XP_015642844.1 receptor kinase-like protein Xa21 isoform X1 [Oryza sativa Japonica Group]	-	-	GO:0004413//homoserine kinase activity;GO:0004672//protein kinase activity;GO:0005515//protein binding;GO:0005524//ATP binding	GO:0006468//protein phosphorylation;GO:0009088//threonine biosynthetic process
SK1G00043519	17.743	92.7403	2.38595	1.63686e-24	4.11649e-22	Os01g0141000	-	-	-	XP_015622259.1 AP2/ERF and B3 domain-containing protein Os01g0141000 [Oryza sativa Japonica Group]	-	-	GO:0003677//DNA binding;GO:0003700//transcription factor activity, sequence-specific DNA binding	GO:0006355//regulation of transcription, DNA-templated
SK1G00069447	8.075	20.749	1.36151	1.77759e-24	4.39399e-22	PUB44	-	-	-	EEC78798.1 hypothetical protein OsI_19053 [Oryza sativa Indica Group]	-	-	GO:0004842//ubiquitin-protein transferase activity;GO:0005515//protein binding;GO:0008270//zinc ion binding	GO:0016567//protein ubiquitination;GO:0043248//proteasome assembly
SK1G00062670	5.107	14.3153	1.48701	2.09886e-24	5.14417e-22	RPPL1	-	-	-	EAZ03477.1 hypothetical protein OsI_25615 [Oryza sativa Indica Group]	-	-	GO:0005515//protein binding;GO:0005524//ATP binding;GO:0016887//ATPase activity;GO:0043531//ADP binding	-
SK1G00071469	0.563	6.15967	3.45165	2.19619e-24	5.33747e-22	--	-	-	-	XP_025876617.1 uncharacterized protein LOC112936645 [Oryza sativa Japonica Group]	-	-	-	-
SK1G00070804	8.368	24.5203	1.55102	3.00496e-24	7.24221e-22	ERD3	-	-	-	EAY93110.1 hypothetical protein OsI_14912 [Oryza sativa Indica Group]	-	-	GO:0003964//RNA-directed DNA polymerase activity;GO:0008168//methyltransferase activity	GO:0000373//Group II intron splicing
SK1G00071125	0.582	6.312	3.43901	3.10611e-24	7.42411e-22	Os10g0521000	Metabolism;Metabolism;Metabolism	Global and overview maps;Global and overview maps;Carbohydrate metabolism	K01194;K01194;K01194	Q9FWC1.1 RecName: Full=Probable trehalase; AltName: Full=Alpha,alpha-trehalase; AltName: Full=Alpha,alpha-trehalose glucohydrolase [Oryza sativa Japonica Group]	ko01100//Metabolic pathways;ko01110//Biosynthesis of secondary metabolites;ko00500//Starch and sucrose metabolism	-	GO:0004555//alpha,alpha-trehalase activity	GO:0005991//trehalose metabolic process
SK1G00066839	0.919	4.04667	2.1386	3.58709e-24	8.50347e-22	--	-	-	-	ABA94295.1 Leucine Rich Repeat family protein, expressed [Oryza sativa Japonica Group]	-	-	GO:0005515//protein binding	-
SK1G00053806	65.533	28.4117	-1.20574	7.51261e-24	1.7108e-21	PTI13	Organismal Systems	Environmental adaptation	K13436	XP_015636544.1 PTI1-like tyrosine-protein kinase 3 [Oryza sativa Japonica Group]	ko04626//Plant-pathogen interaction	-	GO:0004672//protein kinase activity;GO:0005524//ATP binding	GO:0006468//protein phosphorylation
SK1G00041543	4.988	39.9543	3.00182	8.13433e-24	1.82367e-21	BAT1	-	-	-	XP_015622189.1 amino-acid permease BAT1 homolog isoform X2 [Oryza sativa Japonica Group]	-	GO:0005887//integral component of plasma membrane;GO:0016020//membrane	GO:0005275//amine transmembrane transporter activity;GO:0022857//transmembrane transporter activity	GO:0015837//amine transport;GO:0055085//transmembrane transport
SK1G00047293	7.988	1.40533	-2.50692	8.794e-24	1.95639e-21	SAT4	Metabolism;Metabolism;Metabolism;Metabolism;Metabolism;Metabolism	Global and overview maps;Global and overview maps;Global and overview maps;Global and overview maps;Amino acid metabolism;Energy metabolism	K00640;K00640;K00640;K00640;K00640;K00640	EAY88901.1 hypothetical protein OsI_10380 [Oryza sativa Indica Group]	ko01100//Metabolic pathways;ko01110//Biosynthesis of secondary metabolites;ko01200//Carbon metabolism;ko01230//Biosynthesis of amino acids;ko00270//Cysteine and methionine metabolism;ko00920//Sulfur metabolism	GO:0005737//cytoplasm	GO:0003977//UDP-N-acetylglucosamine diphosphorylase activity;GO:0008780//acyl-[acyl-carrier-protein]-UDP-N-acetylglucosamine O-acyltransferase activity;GO:0009001//serine O-acetyltransferase activity;GO:0016410//N-acyltransferase activity;GO:0019134//glucosamine-1-phosphate N-acetyltransferase activity	GO:0006535//cysteine biosynthetic process from serine;GO:0009103//lipopolysaccharide biosynthetic process;GO:0009245//lipid A biosynthetic process;GO:0009252//peptidoglycan biosynthetic process
SK1G00074324	4.134	11.5877	1.48698	9.74543e-24	2.15151e-21	At3g20240	-	-	-	XP_015612278.1 probable mitochondrial adenine nucleotide transporter BTL1 isoform X2 [Oryza sativa Japonica Group]	-	-	-	-
SK1G00049177	4.361	18.2397	2.06435	1.08021e-23	2.36672e-21	PVA13	-	-	-	EEC73738.1 hypothetical protein OsI_08365 [Oryza sativa Indica Group]	-	-	GO:0005319//lipid transporter activity	GO:0006869//lipid transport
SK1G00064068	57.153	120.618	1.07754	1.55768e-23	3.33702e-21	SPBC2A9.03	-	-	-	XP_015651047.1 uncharacterized WD repeat-containing protein C2A9.03 isoform X3 [Oryza sativa Japonica Group]	-	-	GO:0005515//protein binding	-
SK1G00061087	3.235	10.4787	1.69562	2.7194e-23	5.65812e-21	HAK9	-	-	-	XP_015647605.1 probable potassium transporter 9 isoform X1 [Oryza sativa Japonica Group]	-	GO:0016020//membrane	GO:0015079//potassium ion transmembrane transporter activity	GO:0006813//potassium ion transport;GO:0071805//potassium ion transmembrane transport
SK1G00040006	27.777	78.647	1.5015	2.77669e-23	5.73605e-21	GAT1	-	-	-	XP_015620994.1 GABA transporter 1 [Oryza sativa Japonica Group]	-	-	-	-
SK1G00049059	46.888	20.8817	-1.16698	2.80889e-23	5.76142e-21	NFP	-	-	-	EAY87082.1 hypothetical protein OsI_08480 [Oryza sativa Indica Group]	-	-	GO:0003674//molecular_function;GO:0004672//protein kinase activity;GO:0005198//structural molecule activity;GO:0005524//ATP binding	GO:0006468//protein phosphorylation;GO:0019068//virion assembly;GO:0030436//asexual sporulation
SK1G00069079	153.221	63.4273	-1.27244	3.2395e-23	6.58531e-21	VTC2	Metabolism;Metabolism;Metabolism	Global and overview maps;Global and overview maps;Carbohydrate metabolism	K14190;K14190;K14190	EEC68977.1 hypothetical protein OsI_37726 [Oryza sativa Indica Group]	ko01100//Metabolic pathways;ko01110//Biosynthesis of secondary metabolites;ko00053//Ascorbate and aldarate metabolism	-	-	-
SK1G00048148	38.859	82.1037	1.0792	3.25611e-23	6.58531e-21	CYP97A3	Metabolism;Metabolism;Metabolism	Global and overview maps;Global and overview maps;Metabolism of terpenoids and polyketides	K15747;K15747;K15747	EEC74248.1 hypothetical protein OsI_09455 [Oryza sativa Indica Group]	ko01100//Metabolic pathways;ko01110//Biosynthesis of secondary metabolites;ko00906//Carotenoid biosynthesis	-	GO:0005506//iron ion binding;GO:0016705//oxidoreductase activity, acting on paired donors, with incorporation or reduction of molecular oxygen;GO:0020037//heme binding	GO:0055114//oxidation-reduction process
SK1G00046937	22.148	6.76167	-1.71173	3.32318e-23	6.67428e-21	IRKI	-	-	-	EEC74868.1 hypothetical protein OsI_10759 [Oryza sativa Indica Group]	-	-	-	-
SK1G00061734	10.884	30.1177	1.4684	3.4007e-23	6.78288e-21	abkC	-	-	-	EEC82263.1 hypothetical protein OsI_26459 [Oryza sativa Indica Group]	-	-	GO:0004672//protein kinase activity;GO:0016709//oxidoreductase activity, acting on paired donors, with incorporation or reduction of molecular oxygen, NAD(P)H as one donor, and incorporation of one atom of oxygen	GO:0006468//protein phosphorylation;GO:0006744//ubiquinone biosynthetic process
SK1G00057857	2.089	6.36267	1.60682	3.49439e-23	6.92201e-21	RGA1	-	-	-	EEC81232.1 hypothetical protein OsI_24282 [Oryza sativa Indica Group]	-	-	GO:0005515//protein binding;GO:0043531//ADP binding	-
SK1G00064845	4.267	37.923	3.15178	3.55193e-23	6.98813e-21	PRN2	-	-	-	XP_015650594.1 pirin-like protein isoform X1 [Oryza sativa Japonica Group]	-	-	-	-
SK1G00061914	29.346	103.545	1.81902	5.72532e-23	1.10388e-20	HSP18.8	Genetic Information Processing	Folding, sorting and degradation	K13993	EEC82146.1 hypothetical protein OsI_26203 [Oryza sativa Indica Group]	ko04141//Protein processing in endoplasmic reticulum	-	-	-
SK1G00058316	15.218	31.896	1.0676	5.8991e-23	1.12409e-20	VIL1	-	-	-	EAY96532.1 hypothetical protein OsI_18437 [Oryza sativa Indica Group]	-	-	GO:0005515//protein binding	-
SK1G00039412	26.762	8.65467	-1.62864	6.38306e-23	1.19873e-20	HY2	Metabolism;Metabolism	Global and overview maps;Metabolism of cofactors and vitamins	K08101;K08101	XP_015622315.1 phytochromobilin:ferredoxin oxidoreductase, chloroplastic [Oryza sativa Japonica Group]	ko01110//Biosynthesis of secondary metabolites;ko00860//Porphyrin and chlorophyll metabolism	-	GO:0004553//hydrolase activity, hydrolyzing O-glycosyl compounds;GO:0005509//calcium ion binding;GO:0005515//protein binding;GO:0016636//oxidoreductase activity, acting on the CH-CH group of donors, iron-sulfur protein as acceptor;GO:0050897//cobalt ion binding;GO:0051743//red chlorophyll catabolite reductase activity	GO:0000272//polysaccharide catabolic process;GO:0010024//phytochromobilin biosynthetic process;GO:0055114//oxidation-reduction process
SK1G00048878	7.044	17.2033	1.28822	7.03975e-23	1.31353e-20	At1g11330	-	-	-	EAY87251.1 hypothetical protein OsI_08653 [Oryza sativa Indica Group]	-	-	GO:0004672//protein kinase activity;GO:0004674//protein serine/threonine kinase activity;GO:0005524//ATP binding	GO:0006468//protein phosphorylation
SK1G00074404	0.719	2.75967	1.94043	7.67447e-23	1.42278e-20	COL14	-	-	-	XP_015610775.1 zinc finger protein CONSTANS-LIKE 14 [Oryza sativa Japonica Group]	-	-	GO:0005515//protein binding;GO:0008270//zinc ion binding	-
SK1G00062176	7.508	20.1113	1.42151	9.37122e-23	1.70456e-20	--	-	-	-	BAT01415.1 Os07g0469200 [Oryza sativa Japonica Group]	-	-	-	-
SK1G00044339	1.789	10.6727	2.5767	1.06206e-22	1.91974e-20	LRK10L-1.5	-	-	-	XP_015628660.1 LEAF RUST 10 DISEASE-RESISTANCE LOCUS RECEPTOR-LIKE PROTEIN KINASE-like 1.5 [Oryza sativa Japonica Group]	-	GO:0005886//plasma membrane;GO:0016021//integral component of membrane	GO:0004672//protein kinase activity;GO:0005524//ATP binding	GO:0006468//protein phosphorylation
SK1G00061705	18.057	42.294	1.22789	1.11783e-22	2.008e-20	PHOS34	-	-	-	EAZ04279.1 hypothetical protein OsI_26421 [Oryza sativa Indica Group]	-	-	-	-
SK1G00043106	4.465	15.422	1.78826	1.24072e-22	2.20752e-20	GH3.12	Environmental Information Processing	Signal transduction	K14506	BAD81367.1 putative Nt-gh3 deduced protein [Oryza sativa Japonica Group]	ko04075//Plant hormone signal transduction	-	-	-
SK1G00070834	10.856	21.9133	1.01332	1.24417e-22	2.20752e-20	--	-	-	-	XP_015614882.1 uncharacterized protein LOC4349337 [Oryza sativa Japonica Group]	-	-	-	-
SK1G00040281	27.661	10.68	-1.37294	1.52231e-22	2.66828e-20	At1g09575	-	-	-	XP_015625821.1 calcium uniporter protein 6, mitochondrial [Oryza sativa Japonica Group]	-	-	-	-
SK1G00057216	31.439	108.924	1.79269	1.78452e-22	3.09043e-20	VQ25	-	-	-	EEC80981.1 hypothetical protein OsI_23715 [Oryza sativa Indica Group]	-	GO:0005886//plasma membrane;GO:0045121//membrane raft	-	GO:0035556//intracellular signal transduction;GO:0050868//negative regulation of T cell activation
SK1G00048122	16.456	36.6557	1.15542	1.94274e-22	3.3444e-20	ETR3	Environmental Information Processing;Environmental Information Processing	Signal transduction;Signal transduction	K14509;K14509	XP_015626572.1 ethylene receptor 3 isoform X1 [Oryza sativa Japonica Group]	ko04075//Plant hormone signal transduction;ko04016//MAPK signaling pathway - plant	GO:0016020//membrane;GO:0016021//integral component of membrane	GO:0000155//phosphorelay sensor kinase activity;GO:0000156//phosphorelay response regulator activity;GO:0003677//DNA binding;GO:0004673//protein histidine kinase activity;GO:0005515//protein binding;GO:0005524//ATP binding	GO:0000160//phosphorelay signal transduction system;GO:0006796//phosphate-containing compound metabolic process;GO:0006808//regulation of nitrogen utilization;GO:0006817//phosphate ion transport;GO:0007165//signal transduction;GO:0055085//transmembrane transport
SK1G00074766	10.658	28.3447	1.41114	2.00299e-22	3.42772e-20	--	-	-	-	BAT09459.1 Os09g0566075, partial [Oryza sativa Japonica Group]	-	-	-	-
SK1G00043328	6.281	14.039	1.16037	2.11696e-22	3.58338e-20	--	-	-	-	EAY72848.1 hypothetical protein OsI_00717 [Oryza sativa Indica Group]	-	-	-	-
SK1G00069982	24.369	82.9813	1.76774	2.11873e-22	3.58338e-20	GK1	Metabolism;Metabolism	Global and overview maps;Nucleotide metabolism	K00942;K00942	KAB8117645.1 hypothetical protein EE612_059884 [Oryza sativa]	ko01100//Metabolic pathways;ko00230//Purine metabolism	-	GO:0003674//molecular_function;GO:0003677//DNA binding;GO:0003723//RNA binding;GO:0003724//RNA helicase activity;GO:0003924//GTPase activity;GO:0004385//guanylate kinase activity;GO:0005524//ATP binding;GO:0005525//GTP binding;GO:0016787//hydrolase activity;GO:0017111//nucleoside-triphosphatase activity;GO:0043022//ribosome binding	GO:0006412//translation;GO:0009405//pathogenesis;GO:0015949//nucleobase-containing small molecule interconversion;GO:0019634//organic phosphonate metabolic process
SK1G00052906	3.121	8.65267	1.47114	2.56163e-22	4.30727e-20	--	-	-	-	-	-	-	-	-
SK1G00051236	35.347	78.22	1.14595	3.14315e-22	5.17269e-20	--	-	-	-	XP_015627515.1 transcription initiation factor TFIID subunit 15b isoform X1 [Oryza sativa Japonica Group]	-	-	-	-
SK1G00052655	1.131	3.88067	1.77871	4.32009e-22	7.01918e-20	LECRK91	-	-	-	XP_015633882.1 L-type lectin-domain containing receptor kinase IX.1 [Oryza sativa Japonica Group]	-	-	GO:0004672//protein kinase activity;GO:0005524//ATP binding;GO:0030246//carbohydrate binding	GO:0006468//protein phosphorylation
SK1G00049767	0.663	0.171667	-1.9494	4.74718e-22	7.62739e-20	CPT1	-	-	-	EAY86354.1 hypothetical protein OsI_07731 [Oryza sativa Indica Group]	-	-	-	-
SK1G00049067	59.807	29.3403	-1.02743	4.88307e-22	7.80238e-20	RVE6	-	-	-	EEC73789.1 hypothetical protein OsI_08476 [Oryza sativa Indica Group]	-	GO:0005739//mitochondrion	GO:0047961//glycine N-acyltransferase activity	-
SK1G00051136	14.125	38.187	1.43483	5.03895e-22	8.00723e-20	AVT6A	-	-	-	XP_015625588.1 amino acid transporter AVT6A [Oryza sativa Japonica Group]	-	GO:0005887//integral component of plasma membrane	GO:0015173//aromatic amino acid transmembrane transporter activity	GO:0003333//amino acid transmembrane transport;GO:0015801//aromatic amino acid transport
SK1G00068461	11.403	4.86733	-1.22821	5.65189e-22	8.88361e-20	NFD4	-	-	-	KAB8113943.1 hypothetical protein EE612_053104 [Oryza sativa]	-	-	GO:0015297//antiporter activity;GO:0022857//transmembrane transporter activity	GO:0055085//transmembrane transport
SK1G00049023	43.085	18.8197	-1.19494	5.99245e-22	9.33181e-20	--	-	-	-	EAY87115.1 hypothetical protein OsI_08517 [Oryza sativa Indica Group]	-	-	GO:0046872//metal ion binding	-
SK1G00047641	0.338	1.36267	2.01134	6.00158e-22	9.33181e-20	MFSD12	-	-	-	EAY88695.1 hypothetical protein OsI_10171 [Oryza sativa Indica Group]	-	GO:0016021//integral component of membrane	GO:0015486//glycoside-pentoside-hexuronide:cation symporter activity;GO:0022857//transmembrane transporter activity	GO:0006812//cation transport;GO:0008643//carbohydrate transport;GO:0055085//transmembrane transport
SK1G00066788	1.626	5.67533	1.80338	7.70028e-22	1.17831e-19	XA21	-	-	-	XP_015617395.2 receptor kinase-like protein Xa21 isoform X1 [Oryza sativa Japonica Group]	-	-	GO:0004413//homoserine kinase activity;GO:0004672//protein kinase activity;GO:0005515//protein binding;GO:0005524//ATP binding	GO:0006468//protein phosphorylation;GO:0009088//threonine biosynthetic process
SK1G00058830	66.645	350.254	2.39383	8.04713e-22	1.2249e-19	TIP4-1	-	-	-	XP_015640527.1 probable aquaporin TIP4-1 [Oryza sativa Japonica Group]	-	GO:0016020//membrane	GO:0008168//methyltransferase activity;GO:0015267//channel activity	GO:0032259//methylation;GO:0055085//transmembrane transport
SK1G00070888	67.35	32.5427	-1.04935	8.64026e-22	1.30148e-19	MYBS2	-	-	-	XP_015612867.1 transcription factor MYBS2 [Oryza sativa Japonica Group]	-	-	-	-
SK1G00045998	10.793	26.265	1.28305	8.91711e-22	1.33623e-19	GAUT11	Metabolism;Metabolism	Global and overview maps;Carbohydrate metabolism	K13648;K13648	XP_015632796.1 probable galacturonosyltransferase 11 [Oryza sativa Japonica Group]	ko01100//Metabolic pathways;ko00520//Amino sugar and nucleotide sugar metabolism	-	GO:0016757//transferase activity, transferring glycosyl groups	-
SK1G00052995	1.691	4.842	1.51773	9.33956e-22	1.38518e-19	WAK2	-	-	-	XP_015634114.1 wall-associated receptor kinase 2 isoform X1 [Oryza sativa Japonica Group]	-	GO:0005887//integral component of plasma membrane	GO:0004672//protein kinase activity;GO:0005509//calcium ion binding;GO:0005524//ATP binding;GO:0030247//polysaccharide binding	GO:0006468//protein phosphorylation
SK1G00070137	55.763	146.651	1.395	9.59561e-22	1.41589e-19	CBP60B	-	-	-	EAY83482.1 hypothetical protein OsI_38696 [Oryza sativa Indica Group]	-	-	GO:0005516//calmodulin binding	-
SK1G00064245	9.082	33.476	1.88205	1.39268e-21	2.02401e-19	NIA1	Metabolism;Metabolism	Global and overview maps;Energy metabolism	K10534;K10534	XP_015650643.1 nitrate reductase [NADH] 1-like [Oryza sativa Japonica Group]	ko01100//Metabolic pathways;ko00910//Nitrogen metabolism	-	GO:0009055//electron carrier activity;GO:0016002//sulfite reductase activity;GO:0016491//oxidoreductase activity;GO:0016655//oxidoreductase activity, acting on NAD(P)H, quinone or similar compound as acceptor;GO:0030151//molybdenum ion binding	GO:0006790//sulfur compound metabolic process;GO:0006814//sodium ion transport;GO:0010124//phenylacetate catabolic process;GO:0055114//oxidation-reduction process
SK1G00074507	5.152	16.1293	1.64648	1.40616e-21	2.03338e-19	UGT79	-	-	-	EAZ09771.1 hypothetical protein OsI_32058 [Oryza sativa Indica Group]	-	-	GO:0005127//ciliary neurotrophic factor receptor binding;GO:0008194//UDP-glycosyltransferase activity;GO:0016758//transferase activity, transferring hexosyl groups	GO:0043524//negative regulation of neuron apoptotic process;GO:0070120//ciliary neurotrophic factor-mediated signaling pathway
SK1G00045471	4.386	9.37933	1.09658	1.73899e-21	2.50215e-19	At4g22180	-	-	-	XP_015627810.1 LOW QUALITY PROTEIN: putative F-box protein At4g17565 [Oryza sativa Japonica Group]	-	-	GO:0005515//protein binding	-
SK1G00073533	6.058	12.3787	1.03094	1.89641e-21	2.71515e-19	PIX7	-	-	-	EEC84434.1 hypothetical protein OsI_31048 [Oryza sativa Indica Group]	-	-	GO:0004672//protein kinase activity;GO:0005524//ATP binding	GO:0006468//protein phosphorylation
SK1G00047599	122.77	55.458	-1.14649	2.04386e-21	2.91184e-19	HSFA2D	-	-	-	Q8H7Y6.2 RecName: Full=Heat stress transcription factor A-2d; AltName: Full=Heat stress transcription factor 7; Short=rHsf7; AltName: Full=Heat stress transcription factor 8; Short=OsHsf-08 [Oryza sativa Japonica Group]	-	-	GO:0003700//transcription factor activity, sequence-specific DNA binding;GO:0043565//sequence-specific DNA binding	GO:0006355//regulation of transcription, DNA-templated
SK1G00048108	1.479	8.18167	2.46777	2.11558e-21	2.99925e-19	PUB33	-	-	-	XP_015623048.1 U-box domain-containing protein 33 isoform X1 [Oryza sativa Japonica Group]	-	GO:0030867//rough endoplasmic reticulum membrane	GO:0004672//protein kinase activity;GO:0004842//ubiquitin-protein transferase activity;GO:0005524//ATP binding	GO:0006468//protein phosphorylation;GO:0007059//chromosome segregation;GO:0016567//protein ubiquitination;GO:0023041//neuronal signal transduction;GO:0030261//chromosome condensation
SK1G00046464	0.886	3.72533	2.07199	2.56635e-21	3.60298e-19	ARAD1	-	-	-	XP_015628728.1 probable arabinosyltransferase ARAD1 [Oryza sativa Japonica Group]	-	-	GO:0016836//hydro-lyase activity	GO:0009234//menaquinone biosynthetic process
SK1G00041371	2.023	5.838	1.52898	2.59763e-21	3.62029e-19	--	-	-	-	-	-	-	-	-
SK1G00054523	6.654	23.7563	1.83602	2.86151e-21	3.92217e-19	PUP11	-	-	-	CAE04314.3 OSJNBb0016D16.5 [Oryza sativa Japonica Group]	-	GO:0016020//membrane;GO:0016021//integral component of membrane	-	-
SK1G00043605	1.69	0.442	-1.9349	2.90238e-21	3.95943e-19	--	-	-	-	EAY72592.1 hypothetical protein OsI_00458 [Oryza sativa Indica Group]	-	GO:0022627//cytosolic small ribosomal subunit	GO:0003735//structural constituent of ribosome;GO:0004476//mannose-6-phosphate isomerase activity;GO:0008270//zinc ion binding	GO:0005975//carbohydrate metabolic process;GO:0006412//translation
SK1G00072127	7.386	1.69	-2.12777	2.92598e-21	3.97288e-19	--	-	-	-	XP_015614800.1 uncharacterized protein LOC4348336 [Oryza sativa Japonica Group]	-	-	-	-
SK1G00055104	82.702	211.488	1.35458	3.19545e-21	4.28943e-19	G6PGH1	Metabolism;Metabolism;Metabolism;Metabolism;Metabolism	Global and overview maps;Global and overview maps;Global and overview maps;Metabolism of other amino acids;Carbohydrate metabolism	K00033;K00033;K00033;K00033;K00033	XP_015642949.1 6-phosphogluconate dehydrogenase, decarboxylating 1 [Oryza sativa Japonica Group]	ko01100//Metabolic pathways;ko01110//Biosynthesis of secondary metabolites;ko01200//Carbon metabolism;ko00480//Glutathione metabolism;ko00030//Pentose phosphate pathway	GO:0005737//cytoplasm	GO:0004616//phosphogluconate dehydrogenase (decarboxylating) activity;GO:0008442//3-hydroxyisobutyrate dehydrogenase activity;GO:0008679//2-hydroxy-3-oxopropionate reductase activity;GO:0050661//NADP binding	GO:0006098//pentose-phosphate shunt;GO:0006574//valine catabolic process;GO:0055114//oxidation-reduction process
SK1G00043356	27.623	74.724	1.4357	3.32596e-21	4.43272e-19	NPR1	Environmental Information Processing	Signal transduction	K14508	Q5D0W8.1 RecName: Full=BTB/POZ domain and ankyrin repeat-containing protein NPR1; Short=OsNPR1; AltName: Full=NPR1 homolog 1; Short=OsNH1 [Oryza sativa Indica Group]	ko04075//Plant hormone signal transduction	-	GO:0005515//protein binding	-
SK1G00073979	8.87	20.99	1.2427	3.76969e-21	4.9587e-19	GSVIVT00026920001	-	-	-	EEC84640.1 hypothetical protein OsI_31518 [Oryza sativa Indica Group]	-	-	GO:0004650//polygalacturonase activity	GO:0005975//carbohydrate metabolic process;GO:0051186//cofactor metabolic process;GO:0071941//nitrogen cycle metabolic process
SK1G00044630	5.873	17.8393	1.60289	3.77205e-21	4.9587e-19	MEE14	-	-	-	XP_015633042.1 CCG-binding protein 1 [Oryza sativa Japonica Group]	-	-	-	-
SK1G00041595	9.528	3.80833	-1.32301	4.05004e-21	5.27618e-19	APF2	-	-	-	XP_015644424.1 aspartyl protease family protein 2 [Oryza sativa Japonica Group]	-	-	-	-
SK1G00064315	2.053	5.47167	1.41425	5.05805e-21	6.50151e-19	INRPK1	-	-	-	KAB8108705.1 hypothetical protein EE612_044598 [Oryza sativa]	-	-	GO:0004672//protein kinase activity;GO:0005515//protein binding;GO:0005524//ATP binding	GO:0006468//protein phosphorylation
SK1G00070971	13.824	28.1187	1.02435	5.41737e-21	6.90201e-19	At5g59700	-	-	-	EEC67361.1 hypothetical protein OsI_34461 [Oryza sativa Indica Group]	-	GO:0016020//membrane	GO:0004672//protein kinase activity;GO:0005524//ATP binding;GO:0016757//transferase activity, transferring glycosyl groups	GO:0006468//protein phosphorylation
SK1G00074314	2.365	6.47067	1.45207	6.13432e-21	7.7135e-19	At2g24580	Metabolism;Cellular Processes;Metabolism;Metabolism	Global and overview maps;Transport and catabolism;Amino acid metabolism;Amino acid metabolism	K00306;K00306;K00306;K00306	EAZ09620.1 hypothetical protein OsI_31904 [Oryza sativa Indica Group]	ko01100//Metabolic pathways;ko04146//Peroxisome;ko00260//Glycine, serine and threonine metabolism;ko00310//Lysine degradation	GO:0009331//glycerol-3-phosphate dehydrogenase complex	GO:0004368//glycerol-3-phosphate dehydrogenase activity;GO:0004729//oxygen-dependent protoporphyrinogen oxidase activity;GO:0004791//thioredoxin-disulfide reductase activity;GO:0008767//UDP-galactopyranose mutase activity;GO:0015036//disulfide oxidoreductase activity;GO:0016491//oxidoreductase activity;GO:0016647//oxidoreductase activity, acting on the CH-NH group of donors, oxygen as acceptor;GO…	GO:0006071//glycerol metabolic process;GO:0006631//fatty acid metabolic process;GO:0006744//ubiquinone biosynthetic process;GO:0006779//porphyrin-containing compound biosynthetic process;GO:0006790//sulfur compound metabolic process;GO:0006805//xenobiotic metabolic process;GO:0009236//cobalamin biosynthetic process;GO:0009273//peptidoglycan-based cell wall biogenesis;GO:0009398//FMN biosynthetic …
SK1G00051817	22.696	10.448	-1.11921	6.29173e-21	7.87719e-19	CYP74B2	Metabolism;Metabolism	Global and overview maps;Lipid metabolism	K10528;K10528	EAY84158.1 hypothetical protein OsI_05538 [Oryza sativa Indica Group]	ko01110//Biosynthesis of secondary metabolites;ko00592//alpha-Linolenic acid metabolism	-	GO:0005506//iron ion binding;GO:0016705//oxidoreductase activity, acting on paired donors, with incorporation or reduction of molecular oxygen;GO:0020037//heme binding	GO:0055114//oxidation-reduction process
MSTRG.1179	1.023	3.55567	1.79731	6.37057e-21	7.94152e-19	--	-	-	-	Os01g0731375 [Oryza sativa Japonica Group]	-	GO:0030312//external encapsulating structure;GO:0031090//organelle membrane;GO:0043231//intracellular membrane-bounded organelle;GO:0043232//intracellular non-membrane-bounded organelle	-	GO:0009725//response to hormone
SK1G00039702	184.093	439.455	1.25528	6.42077e-21	7.96974e-19	FBA3	Metabolism;Metabolism;Metabolism;Metabolism;Metabolism;Metabolism;Metabolism;Metabolism	Global and overview maps;Global and overview maps;Global and overview maps;Global and overview maps;Carbohydrate metabolism;Energy metabolism;Carbohydrate metabolism;Carbohydrate metabolism	K01623;K01623;K01623;K01623;K01623;K01623;K01623;K01623	XP_015613809.1 fructose-bisphosphate aldolase 3, cytoplasmic [Oryza sativa Japonica Group]	ko01100//Metabolic pathways;ko01110//Biosynthesis of secondary metabolites;ko01200//Carbon metabolism;ko01230//Biosynthesis of amino acids;ko00010//Glycolysis / Gluconeogenesis;ko00710//Carbon fixation in photosynthetic organisms;ko00051//Fructose and mannose metabolism;ko00030//Pentose phosphate pathway	-	GO:0004332//fructose-bisphosphate aldolase activity;GO:0050371//tyrosine phenol-lyase activity	GO:0006096//glycolytic process;GO:0006570//tyrosine metabolic process
SK1G00071468	11.705	24.852	1.08624	6.8911e-21	8.48074e-19	--	-	-	-	XP_015614093.1 uncharacterized protein LOC4348841 [Oryza sativa Japonica Group]	-	-	-	-
SK1G00049243	6.128	12.736	1.05542	7.09567e-21	8.6955e-19	--	-	-	-	-	-	-	-	-
SK1G00066887	2.8	15.318	2.45173	7.14692e-21	8.72136e-19	Os11g0547000	Organismal Systems	Environmental adaptation	K12116	XP_015617056.1 adagio-like protein 3 isoform X1 [Oryza sativa Japonica Group]	ko04712//Circadian rhythm - plant	-	GO:0004871//signal transducer activity;GO:0005515//protein binding	GO:0006355//regulation of transcription, DNA-templated;GO:0007165//signal transduction
SK1G00041508	59.043	23.642	-1.32041	7.28441e-21	8.85179e-19	At2g27360	-	-	-	XP_015642217.1 GDSL esterase/lipase At1g28570 isoform X1 [Oryza sativa Japonica Group]	-	-	GO:0016788//hydrolase activity, acting on ester bonds	-
SK1G00039779	12.993	6.08133	-1.09528	7.95943e-21	9.63158e-19	BT3	-	-	-	EEC71943.1 hypothetical protein OsI_04757 [Oryza sativa Indica Group]	-	-	GO:0005515//protein binding	-
SK1G00039982	73.684	210.941	1.51741	8.85896e-21	1.06311e-18	At2g27500	-	-	-	KAF2953433.1 hypothetical protein DAI22_01g407900 [Oryza sativa Japonica Group]	-	-	GO:0004553//hydrolase activity, hydrolyzing O-glycosyl compounds	GO:0005975//carbohydrate metabolic process
SK1G00057199	9.787	38.9857	1.99401	9.00024e-21	1.0756e-18	--	-	-	-	EEE65945.1 hypothetical protein OsJ_21822 [Oryza sativa Japonica Group]	-	-	-	-
SK1G00057816	15.848	5.88133	-1.43009	1.11402e-20	1.31504e-18	EXO70A1	-	-	-	XP_015643054.1 exocyst complex component EXO70A1 [Oryza sativa Japonica Group]	-	GO:0000145//exocyst	-	GO:0006887//exocytosis
SK1G00041267	20.123	6.83333	-1.55818	1.12842e-20	1.32662e-18	WRKY53	-	-	-	EEC71210.1 hypothetical protein OsI_03124 [Oryza sativa Indica Group]	-	-	GO:0003700//transcription factor activity, sequence-specific DNA binding;GO:0043565//sequence-specific DNA binding	GO:0006355//regulation of transcription, DNA-templated
SK1G00040172	0.981	10.9967	3.48667	1.1724e-20	1.37275e-18	At5g05600	-	-	-	XP_015624858.1 probable 2-oxoglutarate-dependent dioxygenase At5g05600 [Oryza sativa Japonica Group]	-	-	GO:0016491//oxidoreductase activity	GO:0055114//oxidation-reduction process
SK1G00055240	155.153	67.9863	-1.19037	1.32106e-20	1.52826e-18	ADC1	Metabolism;Metabolism	Global and overview maps;Amino acid metabolism	K01583;K01583	XP_015643038.1 arginine decarboxylase 1 [Oryza sativa Japonica Group]	ko01100//Metabolic pathways;ko00330//Arginine and proline metabolism	-	GO:0003824//catalytic activity;GO:0008792//arginine decarboxylase activity;GO:0008836//diaminopimelate decarboxylase activity	GO:0008295//spermidine biosynthetic process;GO:0009089//lysine biosynthetic process via diaminopimelate
SK1G00060057	20.663	63.6927	1.62408	1.39336e-20	1.59342e-18	NFD4	-	-	-	XP_015638076.1 protein NUCLEAR FUSION DEFECTIVE 4 [Oryza sativa Japonica Group]	-	-	-	-
SK1G00070445	17.914	40.8383	1.18884	1.39392e-20	1.59342e-18	WRKY21	-	-	-	EEC69612.1 hypothetical protein OsI_38986 [Oryza sativa Indica Group]	-	-	GO:0003700//transcription factor activity, sequence-specific DNA binding;GO:0043565//sequence-specific DNA binding	GO:0006355//regulation of transcription, DNA-templated
SK1G00059968	8.338	3.798	-1.13446	1.42551e-20	1.61675e-18	HSP70-4	Genetic Information Processing;Genetic Information Processing;Cellular Processes	Folding, sorting and degradation;Transcription;Transport and catabolism	K03283;K03283;K03283	XP_015640166.1 probable mediator of RNA polymerase II transcription subunit 37c [Oryza sativa Japonica Group]	ko04141//Protein processing in endoplasmic reticulum;ko03040//Spliceosome;ko04144//Endocytosis	-	GO:0004856//xylulokinase activity;GO:0005515//protein binding;GO:0005524//ATP binding;GO:0016773//phosphotransferase activity, alcohol group as acceptor;GO:0016787//hydrolase activity;GO:0016887//ATPase activity;GO:0051082//unfolded protein binding	GO:0005975//carbohydrate metabolic process;GO:0005997//xylulose metabolic process;GO:0006457//protein folding;GO:0006950//response to stress;GO:0008360//regulation of cell shape;GO:0042732//D-xylose metabolic process;GO:0043093//FtsZ-dependent cytokinesis
SK1G00074085	1.732	7.44033	2.10293	1.50887e-20	1.69798e-18	At5g35370	-	-	-	EAZ09359.1 hypothetical protein OsI_31631 [Oryza sativa Indica Group]	-	-	GO:0004672//protein kinase activity;GO:0005524//ATP binding	GO:0006468//protein phosphorylation;GO:0048544//recognition of pollen
SK1G00048972	10.111	32.3473	1.67772	1.55597e-20	1.73746e-18	JMJ706	-	-	-	EEC73831.1 hypothetical protein OsI_08565 [Oryza sativa Indica Group]	-	-	-	-
SK1G00060378	9.546	33.5593	1.81375	1.67708e-20	1.85916e-18	Os05g0525900	-	-	-	XP_015637897.1 zinc finger CCCH domain-containing protein 37 [Oryza sativa Japonica Group]	-	-	GO:0046872//metal ion binding	-
SK1G00068857	11.393	5.50733	-1.04872	1.82435e-20	1.99856e-18	--	-	-	-	XP_015619724.1 uncharacterized protein LOC4351526 [Oryza sativa Japonica Group]	-	-	GO:0004725//protein tyrosine phosphatase activity	GO:0006470//protein dephosphorylation
SK1G00048150	172.297	366.199	1.08773	1.83128e-20	1.99858e-18	PED1	Metabolism;Metabolism;Cellular Processes;Metabolism;Metabolism;Metabolism;Metabolism;Metabolism	Global and overview maps;Global and overview maps;Transport and catabolism;Global and overview maps;Lipid metabolism;Lipid metabolism;Amino acid metabolism;Lipid metabolism	K07513;K07513;K07513;K07513;K07513;K07513;K07513;K07513	AIV98504.1 3-ketoacyl-CoA thiolase-like protein [Oryza sativa Japonica Group]	ko01100//Metabolic pathways;ko01110//Biosynthesis of secondary metabolites;ko04146//Peroxisome;ko01212//Fatty acid metabolism;ko00592//alpha-Linolenic acid metabolism;ko00071//Fatty acid degradation;ko00280//Valine, leucine and isoleucine degradation;ko01040//Biosynthesis of unsaturated fatty acids	GO:0042600//chorion	GO:0003985//acetyl-CoA C-acetyltransferase activity;GO:0003988//acetyl-CoA C-acyltransferase activity;GO:0016747//transferase activity, transferring acyl groups other than amino-acyl groups;GO:0033817//beta-ketoacyl-acyl-carrier-protein synthase II activity	GO:0006631//fatty acid metabolic process;GO:0006633//fatty acid biosynthetic process;GO:0007275//multicellular organism development;GO:0009062//fatty acid catabolic process
SK1G00042277	0.898	3.61867	2.01067	1.97865e-20	2.15129e-18	WAK5	-	-	-	BAD89450.1 putative wall-associated kinase 4 [Oryza sativa Japonica Group]	-	GO:0005730//nucleolus;GO:0016021//integral component of membrane	GO:0004672//protein kinase activity;GO:0004674//protein serine/threonine kinase activity;GO:0005509//calcium ion binding;GO:0005524//ATP binding;GO:0030247//polysaccharide binding	GO:0006364//rRNA processing;GO:0006468//protein phosphorylation
SK1G00070159	2.897	9.52267	1.71681	1.99935e-20	2.16203e-18	--	-	-	-	XP_015620583.1 universal stress protein PHOS34 isoform X2 [Oryza sativa Japonica Group]	-	-	-	-
SK1G00049912	2.326	11.174	2.26422	2.00348e-20	2.16203e-18	--	-	-	-	XP_015627648.1 uncharacterized protein LOC4329598 [Oryza sativa Japonica Group]	-	-	-	-
SK1G00067710	0.317	4.49433	3.82555	2.1177e-20	2.26837e-18	GID1	-	-	-	EEC67932.1 hypothetical protein OsI_35647 [Oryza sativa Indica Group]	-	GO:0005576//extracellular region	GO:0016787//hydrolase activity	-
SK1G00049734	11.141	5.29167	-1.07408	2.26501e-20	2.39464e-18	--	-	-	-	BAS79367.1 Os02g0574500, partial [Oryza sativa Japonica Group]	-	GO:0005887//integral component of plasma membrane;GO:0016021//integral component of membrane	GO:0022857//transmembrane transporter activity;GO:0051119//sugar transmembrane transporter activity	GO:0008643//carbohydrate transport;GO:0055085//transmembrane transport
SK1G00047248	60.932	25.103	-1.27934	2.2687e-20	2.39464e-18	MTP4	-	-	-	BAF11353.1 Os03g0226400, partial [Oryza sativa Japonica Group]	-	GO:0016020//membrane;GO:0016021//integral component of membrane	GO:0008324//cation transmembrane transporter activity;GO:0015562//efflux transmembrane transporter activity	GO:0006812//cation transport;GO:0055085//transmembrane transport
SK1G00046905	76.825	31.535	-1.28462	2.4697e-20	2.59732e-18	RHM1	Metabolism;Metabolism	Global and overview maps;Carbohydrate metabolism	K12450;K12450	XP_015630773.1 trifunctional UDP-glucose 4,6-dehydratase/UDP-4-keto-6-deoxy-D-glucose 3,5-epimerase/UDP-4-keto-L-rhamnose-reductase RHM1 isoform X1 [Oryza sativa Japonica Group]	ko01100//Metabolic pathways;ko00520//Amino sugar and nucleotide sugar metabolism	-	GO:0003824//catalytic activity;GO:0003854//3-beta-hydroxy-delta5-steroid dehydrogenase activity;GO:0003978//UDP-glucose 4-epimerase activity;GO:0004043//L-aminoadipate-semialdehyde dehydrogenase activity;GO:0008446//GDP-mannose 4,6-dehydratase activity;GO:0008460//dTDP-glucose 4,6-dehydratase activity;GO:0008712//ADP-glyceromanno-heptose 6-epimerase activity;GO:0008831//dTDP-4-dehydrorhamnose red…	GO:0000271//polysaccharide biosynthetic process;GO:0005975//carbohydrate metabolic process;GO:0006012//galactose metabolic process;GO:0006694//steroid biosynthetic process;GO:0009243//O antigen biosynthetic process;GO:0009244//lipopolysaccharide core region biosynthetic process;GO:0019305//dTDP-rhamnose biosynthetic process;GO:0019878//lysine biosynthetic process via aminoadipic acid;GO:0055114//…
SK1G00062422	2.781	0.643667	-2.11122	2.63061e-20	2.75652e-18	5MAT1	-	-	-	EAZ03602.1 hypothetical protein OsI_25739 [Oryza sativa Indica Group]	-	-	GO:0016747//transferase activity, transferring acyl groups other than amino-acyl groups	-
SK1G00041181	1.199	3.78867	1.65986	2.72472e-20	2.84482e-18	PK1	-	-	-	OEL29347.1 putative receptor protein kinase ZmPK1 [Dichanthelium oligosanthes]	-	-	GO:0003674//molecular_function;GO:0004672//protein kinase activity;GO:0005524//ATP binding;GO:0016709//oxidoreductase activity, acting on paired donors, with incorporation or reduction of molecular oxygen, NAD(P)H as one donor, and incorporation of one atom of oxygen	GO:0006468//protein phosphorylation;GO:0006744//ubiquinone biosynthetic process;GO:0009306//protein secretion;GO:0048544//recognition of pollen
SK1G00060909	0.954	8.73867	3.19535	3.44832e-20	3.58737e-18	RHA2A	-	-	-	KAB8106931.1 hypothetical protein EE612_041472 [Oryza sativa]	-	GO:0005680//anaphase-promoting complex	GO:0008270//zinc ion binding;GO:0046872//metal ion binding;GO:0061630//ubiquitin protein ligase activity;GO:0097602//cullin family protein binding	GO:0031145//anaphase-promoting complex-dependent proteasomal ubiquitin-dependent protein catabolic process
SK1G00043639	9.885	23.3073	1.23747	3.52935e-20	3.64544e-18	--	-	-	-	XP_015640859.1 uncharacterized protein LOC4326042 [Oryza sativa Japonica Group]	-	GO:0016021//integral component of membrane	-	GO:0007155//cell adhesion;GO:0042246//tissue regeneration
SK1G00054560	11.721	33.9777	1.53549	3.62722e-20	3.73319e-18	--	-	-	-	KAF2935873.1 hypothetical protein DAI22_04g262700 [Oryza sativa Japonica Group]	-	-	-	-
SK1G00072517	38.3	14.978	-1.3545	3.90734e-20	3.95119e-18	--	-	-	-	EEC66572.1 hypothetical protein OsI_32748 [Oryza sativa Indica Group]	-	GO:0030117//membrane coat	GO:0005515//protein binding	GO:0006886//intracellular protein transport;GO:0016192//vesicle-mediated transport
SK1G00048828	5.375	25.358	2.2381	3.93207e-20	3.96235e-18	--	-	-	-	-	-	GO:0005886//plasma membrane;GO:0016021//integral component of membrane;GO:0030867//rough endoplasmic reticulum membrane	-	GO:0023041//neuronal signal transduction
SK1G00054973	205.451	75.4453	-1.44529	4.28891e-20	4.30693e-18	HIPP39	-	-	-	XP_015633725.1 heavy metal-associated isoprenylated plant protein 39 [Oryza sativa Japonica Group]	-	-	GO:0046872//metal ion binding	-
SK1G00066505	12.552	56.926	2.18117	4.35462e-20	4.35778e-18	--	-	-	-	EAZ01107.1 hypothetical protein OsI_23137 [Oryza sativa Indica Group]	-	GO:0016020//membrane	GO:0005524//ATP binding;GO:0016896//exoribonuclease activity, producing 5'-phosphomonoesters	GO:0006364//rRNA processing;GO:0042780//tRNA 3'-end processing
SK1G00041417	59.477	29.3437	-1.01928	5.02265e-20	4.99176e-18	--	-	-	-	KAF2951289.1 hypothetical protein DAI22_01g250800 [Oryza sativa Japonica Group]	-	-	-	-
SK1G00062969	11.648	25.8473	1.14993	6.27928e-20	6.17698e-18	--	-	-	-	BAT04035.1 Os08g0172566 [Oryza sativa Japonica Group]	-	-	-	-
SK1G00055435	22.813	68.7363	1.59122	7.5114e-20	7.3391e-18	RAP2-9	-	-	-	XP_015641200.1 ethylene-responsive transcription factor RAP2-9 [Oryza sativa Japonica Group]	-	-	GO:0003700//transcription factor activity, sequence-specific DNA binding	GO:0006355//regulation of transcription, DNA-templated
SK1G00053915	5.33	2.46367	-1.11333	7.61696e-20	7.41717e-18	--	-	-	-	CAH67333.1 OSIGBa0157A06.2 [Oryza sativa]	-	-	-	-
SK1G00062091	10.772	22.5893	1.06836	7.73512e-20	7.50696e-18	RGA3	-	-	-	EEC82030.1 hypothetical protein OsI_26000 [Oryza sativa Indica Group]	-	-	GO:0005515//protein binding;GO:0005524//ATP binding;GO:0016887//ATPase activity;GO:0043531//ADP binding	-
MSTRG.15510	9.381	20.2337	1.10894	8.20383e-20	7.90876e-18	--	-	-	-	Os04g0645800 [Oryza sativa Japonica Group]	-	GO:0043231//intracellular membrane-bounded organelle	-	GO:0006026//aminoglycan catabolic process;GO:0043207//response to external biotic stimulus;GO:0044036//cell wall macromolecule metabolic process
SK1G00048035	5.473	14.2443	1.37998	1.07897e-19	1.02648e-17	--	-	-	-	XP_015631566.1 probable RNA-binding protein EIF1AD [Oryza sativa Japonica Group]	-	-	GO:0003723//RNA binding;GO:0003743//translation initiation factor activity	GO:0006413//translational initiation
SK1G00048620	2.195	5.578	1.34553	1.09456e-19	1.0379e-17	GAUT9	Metabolism;Metabolism	Global and overview maps;Carbohydrate metabolism	K13648;K13648	EAY87516.1 hypothetical protein OsI_08922 [Oryza sativa Indica Group]	ko01100//Metabolic pathways;ko00520//Amino sugar and nucleotide sugar metabolism	-	GO:0016757//transferase activity, transferring glycosyl groups;GO:0051539//4 iron, 4 sulfur cluster binding;GO:0070283//radical SAM enzyme activity	-
SK1G00050925	0.298	1.237	2.05346	1.09945e-19	1.03913e-17	--	-	-	-	XP_025881350.1 uncharacterized protein LOC112939018 [Oryza sativa Japonica Group]	-	-	GO:0003677//DNA binding;GO:0004803//transposase activity;GO:0008270//zinc ion binding	GO:0006313//transposition, DNA-mediated
SK1G00047258	2.87	6.25833	1.12473	1.12962e-19	1.06416e-17	CYP90B2	Metabolism;Metabolism;Metabolism	Global and overview maps;Global and overview maps;Metabolism of terpenoids and polyketides	K09587;K09587;K09587	EEC74804.1 hypothetical protein OsI_10612 [Oryza sativa Indica Group]	ko01100//Metabolic pathways;ko01110//Biosynthesis of secondary metabolites;ko00905//Brassinosteroid biosynthesis	-	GO:0005506//iron ion binding;GO:0016705//oxidoreductase activity, acting on paired donors, with incorporation or reduction of molecular oxygen;GO:0020037//heme binding	GO:0055114//oxidation-reduction process
SK1G00041559	1.85	7.11133	1.94259	1.25537e-19	1.16741e-17	HSR4	-	-	-	XP_015621227.1 AAA-ATPase At3g50940 [Oryza sativa Japonica Group]	-	GO:0000502//proteasome complex;GO:0009360//DNA polymerase III complex;GO:0009379//Holliday junction helicase complex;GO:0009898//cytoplasmic side of plasma membrane;GO:0055052//ATP-binding cassette (ABC) transporter complex, substrate-binding subunit-containing	GO:0003723//RNA binding;GO:0003724//RNA helicase activity;GO:0003887//DNA-directed DNA polymerase activity;GO:0004222//metalloendopeptidase activity;GO:0004386//helicase activity;GO:0005524//ATP binding;GO:0009378//four-way junction helicase activity;GO:0015412//molybdate transmembrane-transporting ATPase activity;GO:0016818//hydrolase activity, acting on acid anhydrides, in phosphorus-containing…	GO:0006260//DNA replication;GO:0006281//DNA repair;GO:0006310//DNA recombination;GO:0006508//proteolysis;GO:0010498//proteasomal protein catabolic process;GO:0015689//molybdate ion transport;GO:0019941//modification-dependent protein catabolic process;GO:0032297//negative regulation of DNA-dependent DNA replication initiation;GO:0051301//cell division
SK1G00071761	48.771	364.504	2.90184	1.28688e-19	1.19288e-17	BURP16	-	-	-	XP_015613275.1 BURP domain-containing protein 16 [Oryza sativa Japonica Group]	-	-	-	-
SK1G00057382	9.324	19.0487	1.03067	1.29284e-19	1.19458e-17	CCR1	-	-	-	EEC81000.1 hypothetical protein OsI_23750 [Oryza sativa Indica Group]	-	-	GO:0003824//catalytic activity;GO:0003854//3-beta-hydroxy-delta5-steroid dehydrogenase activity;GO:0003978//UDP-glucose 4-epimerase activity;GO:0004043//L-aminoadipate-semialdehyde dehydrogenase activity;GO:0008712//ADP-glyceromanno-heptose 6-epimerase activity;GO:0016616//oxidoreductase activity, acting on the CH-OH group of donors, NAD or NADP as acceptor;GO:0016757//transferase activity, trans…	GO:0005975//carbohydrate metabolic process;GO:0006012//galactose metabolic process;GO:0006694//steroid biosynthetic process;GO:0009243//O antigen biosynthetic process;GO:0009244//lipopolysaccharide core region biosynthetic process;GO:0019878//lysine biosynthetic process via aminoadipic acid;GO:0055114//oxidation-reduction process
SK1G00057426	0.277	2.04667	2.88532	1.52945e-19	1.39978e-17	MIMI_L728	-	-	-	XP_025881923.1 uncharacterized protein LOC4341696 [Oryza sativa Japonica Group]	-	-	-	-
SK1G00047770	1.442	5.25567	1.8658	1.79923e-19	1.63121e-17	RZPF34	Genetic Information Processing	Folding, sorting and degradation	K10144	XP_015628710.1 E3 ubiquitin-protein ligase RZFP34 isoform X1 [Oryza sativa Japonica Group]	ko04120//Ubiquitin mediated proteolysis	-	GO:0008270//zinc ion binding	-
SK1G00042654	14.913	37.2577	1.32097	1.90873e-19	1.70905e-17	ABCB21	Environmental Information Processing	Membrane transport	K05658	XP_015612048.1 ABC transporter B family member 21 [Oryza sativa Japonica Group]	ko02010//ABC transporters	GO:0005575//cellular_component;GO:0005737//cytoplasm;GO:0005887//integral component of plasma membrane;GO:0009380//excinuclease repair complex;GO:0009898//cytoplasmic side of plasma membrane;GO:0016021//integral component of membrane;GO:0043190//ATP-binding cassette (ABC) transporter complex;GO:0055051//ATP-binding cassette (ABC) transporter complex, integrated substrate binding;GO:0055052//ATP-b…	GO:0003674//molecular_function;GO:0003676//nucleic acid binding;GO:0003924//GTPase activity;GO:0004020//adenylylsulfate kinase activity;GO:0004140//dephospho-CoA kinase activity;GO:0005260//channel-conductance-controlling ATPase activity;GO:0005319//lipid transporter activity;GO:0005524//ATP binding;GO:0005525//GTP binding;GO:0008565//protein transporter activity;GO:0009381//excinuclease ABC acti…	GO:0000910//cytokinesis;GO:0006289//nucleotide-excision repair;GO:0006412//translation;GO:0006614//SRP-dependent cotranslational protein targeting to membrane;GO:0006790//sulfur compound metabolic process;GO:0006810//transport;GO:0006817//phosphate ion transport;GO:0006824//cobalt ion transport;GO:0006855//drug transmembrane transport;GO:0006869//lipid transport;GO:0007186//G-protein coupled rece…
SK1G00065776	15.893	33.585	1.07943	2.03531e-19	1.81118e-17	NPF6.3	-	-	-	XP_015650127.1 protein NRT1/ PTR FAMILY 6.3 [Oryza sativa Japonica Group]	-	GO:0016020//membrane	GO:0015333//peptide:proton symporter activity;GO:0022857//transmembrane transporter activity	GO:0015833//peptide transport;GO:0055085//transmembrane transport
SK1G00042995	2.202	0.956667	-1.20273	2.22768e-19	1.96423e-17	WIT1	-	-	-	BAS71218.1 Os01g0235350 [Oryza sativa Japonica Group]	-	GO:0031514//motile cilium	GO:0005524//ATP binding	GO:0007059//chromosome segregation;GO:0030261//chromosome condensation;GO:0048870//cell motility
SK1G00044208	15.357	32.3253	1.07377	2.38154e-19	2.09351e-17	SIT2	-	-	-	EAY92387.1 hypothetical protein OsI_14117 [Oryza sativa Indica Group]	-	-	GO:0004672//protein kinase activity;GO:0005524//ATP binding;GO:0030246//carbohydrate binding	GO:0006468//protein phosphorylation
SK1G00073560	10.456	22.4947	1.10525	2.47146e-19	2.16598e-17	At1g51810	-	-	-	XP_015610833.1 probable LRR receptor-like serine/threonine-protein kinase At1g51810 isoform X1 [Oryza sativa Japonica Group]	-	-	GO:0004672//protein kinase activity;GO:0005515//protein binding;GO:0005524//ATP binding	GO:0006468//protein phosphorylation
SK1G00039857	1.206	4.463	1.88778	2.57465e-19	2.24959e-17	PME51	-	-	-	EAY76707.1 hypothetical protein OsI_04662 [Oryza sativa Indica Group]	-	-	GO:0004857//enzyme inhibitor activity;GO:0030599//pectinesterase activity	GO:0042545//cell wall modification
SK1G00047157	70.286	192.141	1.45085	2.67309e-19	2.31463e-17	sec61a	Genetic Information Processing;Cellular Processes;Genetic Information Processing	Folding, sorting and degradation;Transport and catabolism;Folding, sorting and degradation	K10956;K10956;K10956	EEE58576.1 hypothetical protein OsJ_09896 [Oryza sativa Japonica Group]	ko04141//Protein processing in endoplasmic reticulum;ko04145//Phagosome;ko03060//Protein export	GO:0005887//integral component of plasma membrane;GO:0016020//membrane	GO:0015450//P-P-bond-hydrolysis-driven protein transmembrane transporter activity	GO:0015031//protein transport;GO:0043952//protein transport by the Sec complex
SK1G00071243	15.699	7.35967	-1.09296	2.72784e-19	2.34797e-17	CBSX5	-	-	-	XP_015614860.1 CBS domain-containing protein CBSX5 [Oryza sativa Japonica Group]	-	-	-	-
SK1G00050915	14.031	2.21067	-2.66606	3.14055e-19	2.66724e-17	--	-	-	-	XP_015624781.1 uncharacterized protein LOC4328899 [Oryza sativa Japonica Group]	-	-	-	-
SK1G00060151	143.269	308.238	1.10532	3.32579e-19	2.81244e-17	BZIP24	-	-	-	EAY98546.1 hypothetical protein OsI_20459 [Oryza sativa Indica Group]	-	-	GO:0003677//DNA binding;GO:0003700//transcription factor activity, sequence-specific DNA binding	GO:0006355//regulation of transcription, DNA-templated
SK1G00061086	43.224	110.834	1.3585	3.36979e-19	2.84134e-17	CIPK2	-	-	-	XP_015646996.1 CBL-interacting protein kinase 2 [Oryza sativa Japonica Group]	-	-	GO:0004672//protein kinase activity;GO:0005524//ATP binding;GO:0016709//oxidoreductase activity, acting on paired donors, with incorporation or reduction of molecular oxygen, NAD(P)H as one donor, and incorporation of one atom of oxygen	GO:0006468//protein phosphorylation;GO:0006744//ubiquinone biosynthetic process;GO:0007165//signal transduction
SK1G00044057	15.129	36.4227	1.26752	3.63603e-19	3.04805e-17	ALB4	Genetic Information Processing	Folding, sorting and degradation	K03217	XP_015631158.1 ALBINO3-like protein 1, chloroplastic isoform X1 [Oryza sativa Japonica Group]	ko03060//Protein export	GO:0016021//integral component of membrane;GO:0031224//intrinsic component of membrane	GO:0003674//molecular_function;GO:0032977//membrane insertase activity	GO:0051205//protein insertion into membrane
SK1G00066060	14.061	31.039	1.14238	4.0834e-19	3.41318e-17	FAB1D	Metabolism;Cellular Processes;Environmental Information Processing;Metabolism	Global and overview maps;Transport and catabolism;Signal transduction;Carbohydrate metabolism	K00921;K00921;K00921;K00921	QBF58641.1 phosphatidylinositol-4-phosphate 5-kinase [Oryza sativa Indica Group]	ko01100//Metabolic pathways;ko04145//Phagosome;ko04070//Phosphatidylinositol signaling system;ko00562//Inositol phosphate metabolism	-	GO:0005524//ATP binding;GO:0016307//phosphatidylinositol phosphate kinase activity;GO:0016887//ATPase activity	GO:0046488//phosphatidylinositol metabolic process
SK1G00059091	4.834	18.395	1.92802	4.28511e-19	3.55099e-17	--	-	-	-	XP_015639835.1 ankycorbin [Oryza sativa Japonica Group]	-	-	GO:0005515//protein binding	-
SK1G00056489	1.6	9.12333	2.51149	4.81099e-19	3.96406e-17	DJC76	-	-	-	EEC80606.1 hypothetical protein OsI_22964 [Oryza sativa Indica Group]	-	GO:0016020//membrane	GO:0005515//protein binding;GO:0009055//electron carrier activity;GO:0016002//sulfite reductase activity;GO:0051539//4 iron, 4 sulfur cluster binding;GO:0070283//radical SAM enzyme activity	GO:0006457//protein folding;GO:0006790//sulfur compound metabolic process;GO:0009408//response to heat;GO:0043687//post-translational protein modification
SK1G00043499	2.264	7.82967	1.79008	5.06805e-19	4.15221e-17	RGA3	-	-	-	KAF2948732.1 hypothetical protein DAI22_01g056100 [Oryza sativa Japonica Group]	-	-	GO:0005515//protein binding;GO:0043531//ADP binding	-
SK1G00059905	75.762	199.832	1.39924	5.41314e-19	4.42241e-17	COI1B	Environmental Information Processing	Signal transduction	K13463	XP_015639870.1 coronatine-insensitive protein homolog 1b [Oryza sativa Japonica Group]	ko04075//Plant hormone signal transduction	-	GO:0005515//protein binding	-
SK1G00075136	3.853	9.47267	1.29779	5.47126e-19	4.45731e-17	PUB33	-	-	-	KAB8111847.1 hypothetical protein EE612_049639 [Oryza sativa]	-	GO:0005576//extracellular region	GO:0004672//protein kinase activity;GO:0005524//ATP binding;GO:0008289//lipid binding	GO:0006468//protein phosphorylation;GO:0006869//lipid transport
MSTRG.16453	0.435	1.814	2.06009	6.04706e-19	4.91255e-17	--	-	-	-	Os11g0303800, partial [Oryza sativa Japonica Group]	-	-	-	-
SK1G00047721	19.288	45.7927	1.24741	6.61264e-19	5.34201e-17	NPF5.2	-	-	-	EEC74481.1 hypothetical protein OsI_09936 [Oryza sativa Indica Group]	-	GO:0016020//membrane	GO:0015333//peptide:proton symporter activity;GO:0022857//transmembrane transporter activity	GO:0015833//peptide transport;GO:0055085//transmembrane transport
SK1G00045034	5.208	27.431	2.39701	8.95321e-19	7.09413e-17	HIPL1	-	-	-	XP_015632377.1 HIPL1 protein [Oryza sativa Japonica Group]	-	-	-	-
SK1G00061154	4.593	15.7723	1.77989	9.60006e-19	7.58588e-17	--	-	-	-	BAT02953.1 Os07g0650100 [Oryza sativa Japonica Group]	-	-	GO:0004620//phospholipase activity	-
SK1G00042445	4.232	9.82567	1.21522	1.00073e-18	7.88612e-17	PIK-2	-	-	-	EAY73858.1 hypothetical protein OsI_01736 [Oryza sativa Indica Group]	-	GO:0005737//cytoplasm	GO:0003678//DNA helicase activity;GO:0003824//catalytic activity;GO:0005524//ATP binding;GO:0005525//GTP binding;GO:0016301//kinase activity;GO:0016772//transferase activity, transferring phosphorus-containing groups;GO:0016887//ATPase activity;GO:0017111//nucleoside-triphosphatase activity;GO:0043531//ADP binding	GO:0002949//tRNA threonylcarbamoyladenosine modification;GO:0006400//tRNA modification;GO:0006777//Mo-molybdopterin cofactor biosynthetic process;GO:0015809//arginine transport;GO:0015819//lysine transport;GO:0015822//ornithine transport
MSTRG.14059	0.783	5.91067	2.91624	1.05169e-18	8.22048e-17	--	-	-	-	Os04g0345500, partial [Oryza sativa Japonica Group]	-	-	-	-
SK1G00053268	25.755	69.3403	1.42884	1.18939e-18	9.27179e-17	--	-	-	-	EEC77242.1 hypothetical protein OsI_15805 [Oryza sativa Indica Group]	-	-	GO:0003674//molecular_function;GO:0016787//hydrolase activity;GO:0047570//3-oxoadipate enol-lactonase activity;GO:0070205//2-succinyl-6-hydroxy-2,4-cyclohexadiene-1-carboxylate synthase activity	GO:0009234//menaquinone biosynthetic process;GO:0015979//photosynthesis;GO:0042952//beta-ketoadipate pathway
SK1G00054480	25.946	60.416	1.21942	1.21054e-18	9.41131e-17	At3g17800	-	-	-	XP_015636391.1 UV-B-induced protein At3g17800, chloroplastic [Oryza sativa Japonica Group]	-	-	-	-
SK1G00058179	4.347	12.6867	1.54522	1.21663e-18	9.43327e-17	CRK2	-	-	-	EEC78453.1 hypothetical protein OsI_18315 [Oryza sativa Indica Group]	-	-	GO:0004672//protein kinase activity;GO:0005524//ATP binding	GO:0006468//protein phosphorylation
SK1G00073880	0.198	3.514	4.14954	1.2213e-18	9.44421e-17	--	-	-	-	KAB8110578.1 hypothetical protein EE612_047894 [Oryza sativa]	-	GO:0005634//nucleus	GO:0003677//DNA binding;GO:0008270//zinc ion binding	-
SK1G00068220	0.65	1.85433	1.51239	1.27217e-18	9.80849e-17	--	-	-	-	XP_015635226.2 uncharacterized protein LOC4325434 [Oryza sativa Japonica Group]	-	-	-	-
SK1G00043201	37.095	88.5237	1.25484	1.38959e-18	1.05482e-16	BBX22	-	-	-	XP_015630321.1 B-box zinc finger protein 22 [Oryza sativa Japonica Group]	-	-	GO:0008270//zinc ion binding	-
SK1G00074431	16.425	37.083	1.17486	1.48421e-18	1.12075e-16	CYP71A9	-	-	-	XP_015651367.1 cytochrome P450 71A1 [Oryza sativa Japonica Group]	-	-	GO:0005506//iron ion binding;GO:0016705//oxidoreductase activity, acting on paired donors, with incorporation or reduction of molecular oxygen;GO:0020037//heme binding	GO:0055114//oxidation-reduction process
SK1G00071522	51.171	125.934	1.29927	1.52132e-18	1.14281e-16	RZPF34	Genetic Information Processing	Folding, sorting and degradation	K10144	AAP54090.2 CHY zinc finger family protein, expressed [Oryza sativa Japonica Group]	ko04120//Ubiquitin mediated proteolysis	-	GO:0008270//zinc ion binding	-
SK1G00067949	118.941	43.679	-1.44523	1.52572e-18	1.14315e-16	--	-	-	-	EAZ03456.1 hypothetical protein OsI_25594 [Oryza sativa Indica Group]	-	-	-	-
SK1G00043225	3.567	7.50633	1.0734	1.54606e-18	1.15539e-16	SAM2	-	-	-	XP_024314083.1 uncharacterized protein LOC100846493 [Brachypodium distachyon]	-	-	GO:0004478//methionine adenosyltransferase activity;GO:0016740//transferase activity	GO:0006556//S-adenosylmethionine biosynthetic process;GO:0006730//one-carbon metabolic process
SK1G00064437	3.903	12.8683	1.72117	1.56402e-18	1.1658e-16	--	-	-	-	EEC83625.1 hypothetical protein OsI_29350 [Oryza sativa Indica Group]	-	-	GO:0017118//lipoyltransferase activity	GO:0006464//cellular protein modification process
SK1G00071938	0.058	4.78867	6.36743	1.72394e-18	1.27189e-16	BHLH96	-	-	-	XP_015613301.1 transcription factor bHLH96 [Oryza sativa Japonica Group]	-	GO:0005737//cytoplasm;GO:0005852//eukaryotic translation initiation factor 3 complex	GO:0003743//translation initiation factor activity;GO:0046983//protein dimerization activity	-
SK1G00060682	2.082	6.86067	1.72038	1.84267e-18	1.35259e-16	--	-	-	-	KAF2932204.1 hypothetical protein DAI22_05g270200 [Oryza sativa Japonica Group]	-	-	-	-
SK1G00046545	43.682	88.6637	1.0213	1.99836e-18	1.44849e-16	dnajb6-a	-	-	-	XP_015628525.1 uncharacterized protein LOC4332570 [Oryza sativa Japonica Group]	-	-	GO:0003674//molecular_function;GO:0005515//protein binding	GO:0006457//protein folding;GO:0009408//response to heat;GO:0043571//maintenance of CRISPR repeat elements
SK1G00061924	3.398	7.48967	1.14022	2.02366e-18	1.46316e-16	Tf2-12	-	-	-	AAG13508.1 putative gag-pol polyprotein [Oryza sativa Japonica Group]	-	-	-	GO:0015074//DNA integration
SK1G00068260	2.199	9.614	2.12829	2.1861e-18	1.56109e-16	--	-	-	-	XP_015616016.1 protein FAF-like, chloroplastic [Oryza sativa Japonica Group]	-	-	-	-
SK1G00058389	2.919	13.176	2.17437	2.2867e-18	1.62415e-16	At2g19130	-	-	-	XP_015637845.1 G-type lectin S-receptor-like serine/threonine-protein kinase At2g19130 [Oryza sativa Japonica Group]	-	-	GO:0004672//protein kinase activity;GO:0005524//ATP binding	GO:0006468//protein phosphorylation;GO:0048544//recognition of pollen
SK1G00048829	2.507	7.93833	1.66287	2.29125e-18	1.62415e-16	--	-	-	-	EEC73897.1 hypothetical protein OsI_08708 [Oryza sativa Indica Group]	-	-	-	-
SK1G00073910	1.782	6.9	1.9531	2.59033e-18	1.81392e-16	CIPK16	-	-	-	EAZ09117.1 hypothetical protein OsI_31382 [Oryza sativa Indica Group]	-	GO:0015627//type II protein secretion system complex	GO:0004672//protein kinase activity;GO:0005524//ATP binding;GO:0008565//protein transporter activity	GO:0006468//protein phosphorylation;GO:0007165//signal transduction;GO:0015628//protein secretion by the type II secretion system
SK1G00066064	3.406	11.4937	1.75469	2.75636e-18	1.92553e-16	At5g39450	-	-	-	QBF58645.1 F-box domain protein [Oryza sativa Indica Group]	-	-	GO:0005515//protein binding	-
SK1G00048077	1.886	0.397667	-2.2457	2.85886e-18	1.99232e-16	--	-	-	-	EAY88101.1 hypothetical protein OsI_09534 [Oryza sativa Indica Group]	-	-	-	-
SK1G00066871	3.376	6.81067	1.01248	3.22055e-18	2.22754e-16	RGA5	-	-	-	EAY81275.1 hypothetical protein OsI_36455 [Oryza sativa Indica Group]	-	GO:0009379//Holliday junction helicase complex	GO:0005515//protein binding;GO:0005524//ATP binding;GO:0009378//four-way junction helicase activity;GO:0016887//ATPase activity;GO:0043531//ADP binding	GO:0006281//DNA repair;GO:0006310//DNA recombination
SK1G00053371	8.011	3.053	-1.39175	3.2272e-18	2.22754e-16	At5g67130	-	-	-	CAH66396.1 B0222C05.4 [Oryza sativa]	-	-	GO:0005515//protein binding	GO:0007165//signal transduction
SK1G00043415	5.413	15.827	1.54789	3.32984e-18	2.29291e-16	RIP30A	-	-	-	EAY72682.1 hypothetical protein OsI_00549 [Oryza sativa Indica Group]	-	-	GO:0030598//rRNA N-glycosylase activity	GO:0017148//negative regulation of translation
SK1G00049308	0.133	3.53867	4.73371	3.36305e-18	2.31028e-16	CBSX5	-	-	-	EAY86838.1 hypothetical protein OsI_08221 [Oryza sativa Indica Group]	-	-	-	-
SK1G00051856	3.364	1.15733	-1.53937	3.74118e-18	2.54585e-16	YSL8	-	-	-	BAE91888.1 hypothetical protein [Oryza sativa Japonica Group]	-	GO:0016020//membrane	GO:0015198//oligopeptide transporter activity	GO:0006857//oligopeptide transport;GO:0055085//transmembrane transport
SK1G00045617	1.696	5.09367	1.58657	3.77252e-18	2.56115e-16	RGA3	-	-	-	XP_015631286.1 putative disease resistance protein RGA3 isoform X1 [Oryza sativa Japonica Group]	-	-	GO:0000166//nucleotide binding;GO:0003924//GTPase activity;GO:0005047//signal recognition particle binding;GO:0005515//protein binding;GO:0005524//ATP binding;GO:0016530//metallochaperone activity;GO:0016887//ATPase activity;GO:0043531//ADP binding	GO:0006464//cellular protein modification process;GO:0009306//protein secretion
SK1G00044227	12.333	25.8587	1.06812	3.89079e-18	2.63314e-16	CRCK2	-	-	-	XP_015631236.1 calmodulin-binding receptor-like cytoplasmic kinase 2 isoform X1 [Oryza sativa Japonica Group]	-	-	GO:0004672//protein kinase activity;GO:0005524//ATP binding	GO:0006468//protein phosphorylation
SK1G00074043	13.715	5.776	-1.24761	3.89676e-18	2.63314e-16	--	-	-	-	XP_015651351.1 uncharacterized protein LOC4347301 isoform X1 [Oryza sativa Japonica Group]	-	-	-	-
SK1G00042948	23.619	55.4413	1.23101	4.42067e-18	2.96636e-16	NTMC2T6.1	-	-	-	EEC70292.1 hypothetical protein OsI_01122 [Oryza sativa Indica Group]	-	-	-	-
SK1G00070652	5.319	12.5943	1.24355	4.75333e-18	3.17485e-16	CEPR1	-	-	-	XP_015618491.1 receptor protein-tyrosine kinase CEPR1 [Oryza sativa Japonica Group]	-	GO:0016021//integral component of membrane	GO:0004672//protein kinase activity;GO:0005515//protein binding;GO:0005524//ATP binding	GO:0006468//protein phosphorylation;GO:0016539//intein-mediated protein splicing
SK1G00047870	2.051	6.07333	1.56616	4.91663e-18	3.26882e-16	CA2	Metabolism;Metabolism;Metabolism	Global and overview maps;Global and overview maps;Metabolism of terpenoids and polyketides	K15746;K15746;K15746	BAF10729.1 Os03g0125100 [Oryza sativa Japonica Group]	ko01100//Metabolic pathways;ko01110//Biosynthesis of secondary metabolites;ko00906//Carotenoid biosynthesis	-	GO:0005506//iron ion binding;GO:0016491//oxidoreductase activity	GO:0008610//lipid biosynthetic process;GO:0055114//oxidation-reduction process
SK1G00048379	5.986	18.9833	1.66507	4.97989e-18	3.30329e-16	LKR/SDH	Metabolism;Metabolism;Metabolism	Global and overview maps;Global and overview maps;Amino acid metabolism	K14157;K14157;K14157	XP_015626026.1 alpha-aminoadipic semialdehyde synthase [Oryza sativa Japonica Group]	ko01100//Metabolic pathways;ko01110//Biosynthesis of secondary metabolites;ko00310//Lysine degradation	-	GO:0016491//oxidoreductase activity	GO:0055114//oxidation-reduction process
SK1G00072935	12.898	40.673	1.65692	5.27762e-18	3.49277e-16	DSP1	-	-	-	KAF0917414.1 hypothetical protein E2562_017863 [Oryza meyeriana var. granulata] [Oryza meyeriana]	-	-	GO:0004721//phosphoprotein phosphatase activity;GO:0004725//protein tyrosine phosphatase activity	GO:0006470//protein dephosphorylation
SK1G00056536	4.271	18.7533	2.1345	5.61037e-18	3.70451e-16	--	-	-	-	AAK13105.1 Hypothetical protein [Oryza sativa Japonica Group]	-	-	-	-
SK1G00044422	9.063	4.14533	-1.1285	6.04519e-18	3.96446e-16	BAM1	-	-	-	EAY92008.1 hypothetical protein OsI_13698 [Oryza sativa Indica Group]	-	-	GO:0004672//protein kinase activity;GO:0005515//protein binding;GO:0005524//ATP binding	GO:0006468//protein phosphorylation
SK1G00057470	5.957	13.217	1.14974	6.52422e-18	4.26894e-16	AVT6E	-	-	-	XP_015643603.1 amino acid transporter AVT6E [Oryza sativa Japonica Group]	-	-	-	-
SK1G00064918	2.132	9.715	2.18801	6.55494e-18	4.27935e-16	GEK1	-	-	-	EAZ06618.1 hypothetical protein OsI_28867 [Oryza sativa Indica Group]	-	-	GO:0016788//hydrolase activity, acting on ester bonds;GO:0051499//D-aminoacyl-tRNA deacylase activity	-
SK1G00054557	20.249	45.539	1.16925	6.60471e-18	4.29247e-16	UEL-2	Metabolism;Metabolism	Global and overview maps;Carbohydrate metabolism	K12448;K12448	KAF0892564.1 hypothetical protein E2562_016861 [Oryza meyeriana var. granulata] [Oryza meyeriana]	ko01100//Metabolic pathways;ko00520//Amino sugar and nucleotide sugar metabolism	-	GO:0003824//catalytic activity;GO:0003854//3-beta-hydroxy-delta5-steroid dehydrogenase activity;GO:0003978//UDP-glucose 4-epimerase activity;GO:0008446//GDP-mannose 4,6-dehydratase activity;GO:0008460//dTDP-glucose 4,6-dehydratase activity;GO:0008667//2,3-dihydro-2,3-dihydroxybenzoate dehydrogenase activity;GO:0008712//ADP-glyceromanno-heptose 6-epimerase activity;GO:0008831//dTDP-4-dehydrorhamno…	GO:0000271//polysaccharide biosynthetic process;GO:0005975//carbohydrate metabolic process;GO:0006012//galactose metabolic process;GO:0006694//steroid biosynthetic process;GO:0009243//O antigen biosynthetic process;GO:0009244//lipopolysaccharide core region biosynthetic process;GO:0019305//dTDP-rhamnose biosynthetic process;GO:0055114//oxidation-reduction process
SK1G00053654	237.416	70.422	-1.75332	6.68255e-18	4.33332e-16	--	-	-	-	XP_015634510.1 heavy metal-associated isoprenylated plant protein 16 [Oryza sativa Japonica Group]	-	-	GO:0046872//metal ion binding	-
SK1G00046606	17.548	39.9707	1.18764	7.10358e-18	4.58577e-16	--	-	-	-	NP_001347129.1 FIP1[III]-like protein precursor [Oryza sativa Japonica Group]	-	-	GO:0020037//heme binding	-
SK1G00066055	3.377	0.639667	-2.40035	7.28116e-18	4.67952e-16	NAC030	-	-	-	XP_015650248.1 NAC domain-containing protein 105 [Oryza sativa Japonica Group]	-	-	GO:0003677//DNA binding	GO:0006355//regulation of transcription, DNA-templated
SK1G00048900	0.358	2.15767	2.59144	7.44759e-18	4.77587e-16	DOF5.6	-	-	-	XP_015623280.1 dof zinc finger protein DOF3.1 [Oryza sativa Japonica Group]	-	-	GO:0003677//DNA binding	GO:0006355//regulation of transcription, DNA-templated;GO:0010124//phenylacetate catabolic process
SK1G00063461	3.723	7.59467	1.02852	7.66283e-18	4.8922e-16	--	-	-	-	EEE66489.1 hypothetical protein OsJ_22928 [Oryza sativa Japonica Group]	-	-	-	-
SK1G00046621	79.371	25.374	-1.64526	8.30464e-18	5.24407e-16	CP1	Organismal Systems;Environmental Information Processing;Environmental Information Processing	Environmental adaptation;Signal transduction;Signal transduction	K02183;K02183;K02183	EAY89735.1 hypothetical protein OsI_11276 [Oryza sativa Indica Group]	ko04626//Plant-pathogen interaction;ko04016//MAPK signaling pathway - plant;ko04070//Phosphatidylinositol signaling system	-	GO:0005509//calcium ion binding;GO:0005515//protein binding	-
SK1G00045170	0.535	2.706	2.33855	8.32623e-18	5.24625e-16	--	-	-	-	KAB8112583.1 hypothetical protein EE612_051135 [Oryza sativa]	-	-	GO:0008234//cysteine-type peptidase activity	GO:0006508//proteolysis
SK1G00064429	26.171	208.953	2.99714	8.59069e-18	5.3894e-16	RNS3	-	-	-	EAZ07095.1 hypothetical protein OsI_29344 [Oryza sativa Indica Group]	-	-	GO:0003723//RNA binding;GO:0033897//ribonuclease T2 activity	-
SK1G00068985	0.427	4.15067	3.28104	9.29593e-18	5.81921e-16	ERF110	-	-	-	XP_015619856.1 ethylene-responsive transcription factor ERF110 [Oryza sativa Japonica Group]	-	-	GO:0003700//transcription factor activity, sequence-specific DNA binding	GO:0006355//regulation of transcription, DNA-templated
SK1G00072172	2.111	11.7667	2.47871	9.64674e-18	6.01279e-16	UGT83A1	-	-	-	XP_015612887.1 UDP-glycosyltransferase 83A1 [Oryza sativa Japonica Group]	-	-	GO:0008194//UDP-glycosyltransferase activity	-
SK1G00053991	5.105	14.9947	1.55447	1.01693e-17	6.32485e-16	SALR	Metabolism;Metabolism	Global and overview maps;Metabolism of terpenoids and polyketides	K15095;K15095	XP_015635605.1 salutaridine reductase [Oryza sativa Japonica Group]	ko01110//Biosynthesis of secondary metabolites;ko00902//Monoterpenoid biosynthesis	-	GO:0003824//catalytic activity;GO:0004316//3-oxoacyl-[acyl-carrier-protein] reductase (NADPH) activity;GO:0004757//sepiapterin reductase activity;GO:0008667//2,3-dihydro-2,3-dihydroxybenzoate dehydrogenase activity;GO:0008678//2-deoxy-D-gluconate 3-dehydrogenase activity;GO:0016491//oxidoreductase activity;GO:0016630//protochlorophyllide reductase activity;GO:0050662//coenzyme binding;GO:0051287/…	GO:0000272//polysaccharide catabolic process;GO:0006633//fatty acid biosynthetic process;GO:0006729//tetrahydrobiopterin biosynthetic process;GO:0015995//chlorophyll biosynthetic process;GO:0055114//oxidation-reduction process
SK1G00065272	1.959	6.83333	1.80247	1.02014e-17	6.33121e-16	At1g80870	-	-	-	XP_015648604.1 putative receptor-like protein kinase At1g80870 [Oryza sativa Japonica Group]	-	-	GO:0004672//protein kinase activity;GO:0005524//ATP binding	GO:0006468//protein phosphorylation
SK1G00066063	6.997	14.545	1.05571	1.0536e-17	6.52488e-16	EHD3	-	-	-	QBF58642.1 PHD-finger domain containing protein [Oryza sativa Indica Group]	-	-	-	-
SK1G00059737	14.826	4.92067	-1.5912	1.05696e-17	6.5317e-16	At1g09660/At1g09670	-	-	-	XP_015640815.1 KH domain-containing protein At1g09660/At1g09670 isoform X1 [Oryza sativa Japonica Group]	-	-	GO:0003723//RNA binding	-
SK1G00048530	0.195	1.95633	3.32661	1.13286e-17	6.95614e-16	--	-	-	-	EAY87617.1 hypothetical protein OsI_09028 [Oryza sativa Indica Group]	-	-	-	-
SK1G00060876	32.827	13.6553	-1.26542	1.15117e-17	7.0387e-16	CML24	Organismal Systems	Environmental adaptation	K13448	XP_015645027.1 probable calcium-binding protein CML24 [Oryza sativa Japonica Group]	ko04626//Plant-pathogen interaction	-	GO:0004553//hydrolase activity, hydrolyzing O-glycosyl compounds;GO:0005509//calcium ion binding;GO:0005515//protein binding	GO:0000272//polysaccharide catabolic process
SK1G00054849	2.312	5.23833	1.17997	1.16069e-17	7.0819e-16	UBP22	-	-	-	CAH68425.1 H0811D08.10 [Oryza sativa]	-	-	GO:0004843//thiol-dependent ubiquitin-specific protease activity;GO:0008270//zinc ion binding	GO:0016579//protein deubiquitination
SK1G00061596	3.775	9.17567	1.28134	1.20742e-17	7.32071e-16	At1g31672	Metabolism;Metabolism;Metabolism;Metabolism;Metabolism;Metabolism;Metabolism;Metabolism	Global and overview maps;Global and overview maps;Amino acid metabolism;Metabolism of other amino acids;Amino acid metabolism;Amino acid metabolism;Biosynthesis of other secondary metabolites;Biosynthesis of other secondary metabolites	K00276;K00276;K00276;K00276;K00276;K00276;K00276;K00276	EEC82302.1 hypothetical protein OsI_26556 [Oryza sativa Indica Group]	ko01100//Metabolic pathways;ko01110//Biosynthesis of secondary metabolites;ko00260//Glycine, serine and threonine metabolism;ko00410//beta-Alanine metabolism;ko00350//Tyrosine metabolism;ko00360//Phenylalanine metabolism;ko00960//Tropane, piperidine and pyridine alkaloid biosynthesis;ko00950//Isoquinoline alkaloid biosynthesis	-	GO:0005507//copper ion binding;GO:0008131//primary amine oxidase activity;GO:0048038//quinone binding	GO:0009308//amine metabolic process;GO:0055114//oxidation-reduction process
SK1G00064518	19.919	60.4687	1.60204	1.27809e-17	7.73299e-16	HOX5	-	-	-	Q9XH36.1 RecName: Full=Homeobox-leucine zipper protein HOX5; AltName: Full=HD-ZIP protein HOX5; AltName: Full=Homeodomain transcription factor HOX5; AltName: Full=OsHox5 [Oryza sativa Indica Group]	-	-	GO:0003677//DNA binding;GO:0043565//sequence-specific DNA binding	GO:0006260//DNA replication;GO:0006355//regulation of transcription, DNA-templated
SK1G00054366	17.666	7.64767	-1.20788	1.29792e-17	7.82022e-16	--	-	-	-	EAY95256.1 hypothetical protein OsI_17076 [Oryza sativa Indica Group]	-	-	-	-
SK1G00058698	7.351	2.93667	-1.32376	1.31343e-17	7.89485e-16	BBX22	-	-	-	KAB8098495.1 hypothetical protein EE612_027757 [Oryza sativa]	-	-	GO:0008270//zinc ion binding	-
SK1G00063500	0.793	3.09367	1.96392	1.34638e-17	8.06183e-16	SIT2	-	-	-	EAZ02656.1 hypothetical protein OsI_24767 [Oryza sativa Indica Group]	-	-	GO:0004672//protein kinase activity;GO:0005524//ATP binding;GO:0030246//carbohydrate binding	GO:0006468//protein phosphorylation
SK1G00042049	3.273	17.0583	2.38179	1.37972e-17	8.22738e-16	At3g01520	-	-	-	XP_015620990.1 universal stress protein A-like protein [Oryza sativa Japonica Group]	-	-	-	-
SK1G00043684	32.368	74.1183	1.19526	1.49227e-17	8.84385e-16	--	-	-	-	XP_015614466.1 transmembrane protein 214-B [Oryza sativa Japonica Group]	-	GO:0005634//nucleus	GO:0000772//mating pheromone activity	-
SK1G00067836	6.936	32.475	2.22715	1.53153e-17	9.02107e-16	RPM1	Organismal Systems	Environmental adaptation	K13457	BAA75813.1 RPR1h [Oryza sativa Indica Group]	ko04626//Plant-pathogen interaction	GO:0016272//prefoldin complex;GO:0039679//viral occlusion body	GO:0005484//SNAP receptor activity;GO:0005515//protein binding;GO:0009378//four-way junction helicase activity;GO:0016887//ATPase activity;GO:0043531//ADP binding;GO:0051082//unfolded protein binding	GO:0001887//selenium compound metabolic process;GO:0006281//DNA repair;GO:0006310//DNA recombination;GO:0006400//tRNA modification;GO:0006457//protein folding;GO:0006890//retrograde vesicle-mediated transport, Golgi to ER;GO:0009306//protein secretion
SK1G00050689	2.558	7.13233	1.47936	1.60975e-17	9.44332e-16	At1g35710	-	-	-	EAY85366.1 hypothetical protein OsI_06744 [Oryza sativa Indica Group]	-	GO:0043231//intracellular membrane-bounded organelle	GO:0004672//protein kinase activity;GO:0005515//protein binding;GO:0005524//ATP binding;GO:0051537//2 iron, 2 sulfur cluster binding	GO:0006468//protein phosphorylation
SK1G00070646	958.184	1989.51	1.05404	1.64328e-17	9.62051e-16	RBG7	-	-	-	AAB65412.1 glycine-rich protein [Oryza sativa Indica Group]	-	-	GO:0003676//nucleic acid binding	GO:0008380//RNA splicing
MSTRG.9762	0.536	4.40767	3.03971	1.77522e-17	1.03095e-15	HRPN	Metabolism;Metabolism;Metabolism	Global and overview maps;Global and overview maps;Biosynthesis of other secondary metabolites	K00430;K00430;K00430	peroxidase A2 [Oryza sativa Japonica Group]	ko01100//Metabolic pathways;ko01110//Biosynthesis of secondary metabolites;ko00940//Phenylpropanoid biosynthesis	GO:0031090//organelle membrane;GO:0043231//intracellular membrane-bounded organelle	GO:0003824//catalytic activity;GO:0016209//antioxidant activity;GO:0043169//cation binding;GO:0046906//tetrapyrrole binding	GO:0006950//response to stress;GO:0009624//response to nematode;GO:0044710//single-organism metabolic process;GO:0090567//reproductive shoot system development
SK1G00063501	0.421	1.491	1.82439	1.7939e-17	1.03785e-15	SIT2	-	-	-	BAC57688.1 putative receptor-like protein kinase [Oryza sativa Japonica Group]	-	-	GO:0004672//protein kinase activity;GO:0005524//ATP binding;GO:0030246//carbohydrate binding	GO:0006468//protein phosphorylation
SK1G00044680	26.762	8.079	-1.72794	1.88884e-17	1.09036e-15	--	-	-	-	XP_015628177.1 uncharacterized protein LOC4334034 [Oryza sativa Japonica Group]	-	-	-	-
SK1G00047014	21.924	5.05333	-2.1172	2.04531e-17	1.17134e-15	At1g01500	-	-	-	XP_015630866.1 uncharacterized protein At1g01500 [Oryza sativa Japonica Group]	-	-	-	GO:0000398//mRNA splicing, via spliceosome
SK1G00041183	7.424	19.757	1.4121	2.06747e-17	1.18169e-15	PK1	-	-	-	XP_015630839.1 putative receptor protein kinase ZmPK1 [Oryza sativa Japonica Group]	-	-	GO:0004672//protein kinase activity;GO:0005524//ATP binding	GO:0006468//protein phosphorylation;GO:0048544//recognition of pollen
SK1G00071109	11.566	29.2843	1.34024	2.10644e-17	1.20159e-15	HLB1	-	-	-	XP_015614985.1 protein HLB1 [Oryza sativa Japonica Group]	-	-	GO:0005515//protein binding	-
SK1G00070733	0.893	4.31567	2.27285	2.15642e-17	1.22767e-15	NAC071	-	-	-	XP_015612876.1 NAC domain-containing protein 71 [Oryza sativa Japonica Group]	-	-	GO:0003677//DNA binding	GO:0006355//regulation of transcription, DNA-templated
SK1G00047347	10.507	26.6823	1.34453	2.16785e-17	1.23176e-15	Ascc2	-	-	-	EEC74717.1 hypothetical protein OsI_10441 [Oryza sativa Indica Group]	-	-	GO:0043130//ubiquitin binding	-
SK1G00041924	17.965	39.681	1.14326	2.46342e-17	1.38481e-15	CSC1	-	-	-	XP_015616435.1 calcium permeable stress-gated cation channel 1 [Oryza sativa Japonica Group]	-	GO:0016020//membrane	-	-
SK1G00055742	1.668	3.64067	1.12608	2.46595e-17	1.38481e-15	--	-	-	-	EEE65267.1 hypothetical protein OsJ_20473 [Oryza sativa Japonica Group]	-	-	-	-
SK1G00045288	6.797	3.22033	-1.07769	2.50205e-17	1.40236e-15	IP5P7	-	-	-	XP_015632239.1 type IV inositol polyphosphate 5-phosphatase 7 isoform X4 [Oryza sativa Japonica Group]	-	-	-	-
SK1G00060647	17.225	38.3893	1.1562	2.70171e-17	1.50842e-15	At1g75220	-	-	-	XP_015640270.1 sugar transporter ERD6-like 4 [Oryza sativa Japonica Group]	-	GO:0005887//integral component of plasma membrane;GO:0016021//integral component of membrane	GO:0008028//monocarboxylic acid transmembrane transporter activity;GO:0015295//solute:proton symporter activity;GO:0022857//transmembrane transporter activity;GO:0042910//xenobiotic transporter activity;GO:0051119//sugar transmembrane transporter activity	GO:0006810//transport;GO:0008643//carbohydrate transport;GO:0015718//monocarboxylic acid transport;GO:0042908//xenobiotic transport;GO:0055085//transmembrane transport
SK1G00040664	7.936	20.288	1.35414	2.90894e-17	1.61477e-15	Os01g0276800	-	-	-	BAF06179.1 Os01g0752400 [Oryza sativa Japonica Group]	-	-	-	-
SK1G00054522	19.567	76.8617	1.97384	3.0499e-17	1.68977e-15	PUP11	-	-	-	XP_015636836.1 probable purine permease 11 isoform X2 [Oryza sativa Japonica Group]	-	GO:0016020//membrane;GO:0016021//integral component of membrane	-	-
SK1G00060056	2.661	7.13333	1.42261	3.11212e-17	1.72095e-15	--	-	-	-	EAY98410.1 hypothetical protein OsI_20324 [Oryza sativa Indica Group]	-	-	-	-
SK1G00053799	2.568	17.547	2.77251	3.20152e-17	1.76364e-15	BHLH128	-	-	-	XP_015636683.1 transcription factor bHLH129 [Oryza sativa Japonica Group]	-	-	GO:0046983//protein dimerization activity	-
SK1G00039898	93.944	34.982	-1.42519	3.34066e-17	1.83331e-15	MYB308	-	-	-	XP_015627699.1 myb-related protein 308 [Oryza sativa Japonica Group]	-	GO:0005634//nucleus	GO:0003676//nucleic acid binding;GO:0005524//ATP binding;GO:0016818//hydrolase activity, acting on acid anhydrides, in phosphorus-containing anhydrides	GO:0006338//chromatin remodeling
SK1G00054830	155.985	378.303	1.27813	3.55356e-17	1.93545e-15	Os04g0650000	-	-	-	EEC78138.1 hypothetical protein OsI_17694 [Oryza sativa Indica Group]	-	-	GO:0008234//cysteine-type peptidase activity	GO:0006508//proteolysis
SK1G00049620	86.436	36.0067	-1.26337	4.03499e-17	2.18123e-15	PHT2-1	-	-	-	XP_015626495.1 inorganic phosphate transporter 2-1, chloroplastic [Oryza sativa Japonica Group]	-	GO:0016020//membrane	GO:0003677//DNA binding;GO:0005315//inorganic phosphate transmembrane transporter activity	GO:0006355//regulation of transcription, DNA-templated;GO:0006817//phosphate ion transport
SK1G00041089	1.04	0.269333	-1.94912	4.05727e-17	2.18918e-15	UGT84A13	-	-	-	KAB8082987.1 hypothetical protein EE612_005051 [Oryza sativa]	-	-	GO:0008194//UDP-glycosyltransferase activity;GO:0016758//transferase activity, transferring hexosyl groups	-
SK1G00063743	9.866	28.537	1.5323	4.17461e-17	2.2483e-15	MYB1	-	-	-	EAZ07904.1 hypothetical protein OsI_30160 [Oryza sativa Indica Group]	-	GO:0005634//nucleus	GO:0003676//nucleic acid binding;GO:0005524//ATP binding;GO:0016818//hydrolase activity, acting on acid anhydrides, in phosphorus-containing anhydrides	GO:0006338//chromatin remodeling
SK1G00075135	17.151	4.775	-1.84472	4.29333e-17	2.30366e-15	PDX12	Metabolism	Metabolism of cofactors and vitamins	K06215	XP_015613234.1 probable pyridoxal 5'-phosphate synthase subunit PDX1.2 [Oryza sativa Japonica Group]	ko00750//Vitamin B6 metabolism	-	GO:0004425//indole-3-glycerol-phosphate synthase activity;GO:0004834//tryptophan synthase activity;GO:0017150//tRNA dihydrouridine synthase activity;GO:0047465//N-acylglucosamine-6-phosphate 2-epimerase activity;GO:0050660//flavin adenine dinucleotide binding	GO:0000162//tryptophan biosynthetic process;GO:0006051//N-acetylmannosamine metabolic process;GO:0008033//tRNA processing;GO:0008615//pyridoxine biosynthetic process;GO:0055114//oxidation-reduction process
SK1G00044373	89.349	215.217	1.26827	4.99342e-17	2.64012e-15	--	-	-	-	XP_015632673.1 uncharacterized protein LOC4334503 isoform X1 [Oryza sativa Japonica Group]	-	-	GO:0003824//catalytic activity;GO:0005525//GTP binding	GO:0006777//Mo-molybdopterin cofactor biosynthetic process
SK1G00043504	46.458	99.2923	1.09576	5.05249e-17	2.66648e-15	POPTR_0012s05040g	-	-	-	EAY72457.1 hypothetical protein OsI_00311 [Oryza sativa Indica Group]	-	-	GO:0004634//phosphopyruvate hydratase activity;GO:0016836//hydro-lyase activity;GO:0050096//methylaspartate ammonia-lyase activity	GO:0006096//glycolytic process;GO:0009234//menaquinone biosynthetic process;GO:0019670//anaerobic glutamate catabolic process
SK1G00064189	309.788	112.383	-1.46286	5.21823e-17	2.74893e-15	PUMP5	-	-	-	XP_015650890.1 mitochondrial uncoupling protein 5 [Oryza sativa Japonica Group]	-	-	-	-
SK1G00045853	14.663	44.9473	1.61606	5.30008e-17	2.78697e-15	--	-	-	-	XP_015628034.1 serine/arginine repetitive matrix protein 1 [Oryza sativa Japonica Group]	-	-	-	-
SK1G00042015	2.085	4.61433	1.14607	5.40372e-17	2.83632e-15	murG	Metabolism	Global and overview maps	K02563	EAY74292.1 hypothetical protein OsI_02179 [Oryza sativa Indica Group]	ko01100//Metabolic pathways	-	GO:0008194//UDP-glycosyltransferase activity;GO:0016758//transferase activity, transferring hexosyl groups;GO:0050511//undecaprenyldiphospho-muramoylpentapeptide beta-N-acetylglucosaminyltransferase activity	GO:0005975//carbohydrate metabolic process;GO:0009252//peptidoglycan biosynthetic process;GO:0030259//lipid glycosylation
SK1G00071455	6.93	16.4377	1.24608	5.53029e-17	2.88703e-15	Os10g0467600	Genetic Information Processing	Translation	K03259	EEC67135.1 hypothetical protein OsI_33962 [Oryza sativa Indica Group]	ko03013//RNA transport	-	GO:0003723//RNA binding;GO:0003743//translation initiation factor activity	GO:0006413//translational initiation
SK1G00066322	3.187	8.742	1.45576	5.64467e-17	2.94143e-15	RPPL1	-	-	-	BAF28787.2 Os11g0668000 [Oryza sativa Japonica Group]	-	GO:0005737//cytoplasm	GO:0004849//uridine kinase activity;GO:0005524//ATP binding;GO:0016772//transferase activity, transferring phosphorus-containing groups;GO:0043531//ADP binding;GO:0051989//coproporphyrinogen dehydrogenase activity	GO:0006779//porphyrin-containing compound biosynthetic process;GO:0015809//arginine transport;GO:0015819//lysine transport;GO:0015822//ornithine transport;GO:0046108//uridine metabolic process
SK1G00058702	5.3	11.2977	1.09196	5.75858e-17	2.99002e-15	NIP1-3	-	-	-	EEC78689.1 hypothetical protein OsI_18834 [Oryza sativa Indica Group]	-	GO:0016020//membrane;GO:0016021//integral component of membrane	GO:0015267//channel activity	GO:0055085//transmembrane transport
SK1G00069044	0.143	1.879	3.71588	5.95139e-17	3.08459e-15	PUR2	Metabolism;Metabolism;Metabolism	Global and overview maps;Global and overview maps;Nucleotide metabolism	K01945;K01945;K01945	EAY82548.1 hypothetical protein OsI_37769 [Oryza sativa Indica Group]	ko01100//Metabolic pathways;ko01110//Biosynthesis of secondary metabolites;ko00230//Purine metabolism	GO:0005737//cytoplasm;GO:0005951//carbamoyl-phosphate synthase complex;GO:0009317//acetyl-CoA carboxylase complex	GO:0003989//acetyl-CoA carboxylase activity;GO:0004075//biotin carboxylase activity;GO:0004088//carbamoyl-phosphate synthase (glutamine-hydrolyzing) activity;GO:0004637//phosphoribosylamine-glycine ligase activity;GO:0004644//phosphoribosylglycinamide formyltransferase activity;GO:0004736//pyruvate carboxylase activity;GO:0004774//succinate-CoA ligase activity;GO:0004775//succinate-CoA ligase (AD…	GO:0006094//gluconeogenesis;GO:0006099//tricarboxylic acid cycle;GO:0006189//'de novo' IMP biosynthetic process;GO:0006633//fatty acid biosynthetic process;GO:0009113//purine nucleobase biosynthetic process;GO:0009152//purine ribonucleotide biosynthetic process;GO:0009220//pyrimidine ribonucleotide biosynthetic process;GO:0009252//peptidoglycan biosynthetic process;GO:0051235//maintenance of loca…
SK1G00061866	14.538	33.214	1.19196	6.24384e-17	3.22461e-15	OsI_26380	-	-	-	NP_001339735.1 uncharacterized protein LOC100273666 [Zea mays]	-	-	GO:0003677//DNA binding	-
SK1G00060053	29.596	60.3333	1.02755	6.25914e-17	3.22675e-15	TOL6	-	-	-	XP_015639492.1 TOM1-like protein 6 [Oryza sativa Japonica Group]	-	-	-	GO:0006886//intracellular protein transport;GO:0019050//suppression by virus of host apoptotic process
SK1G00046443	2.68	6.22867	1.21669	6.39812e-17	3.28668e-15	WRKY46	-	-	-	XP_015631650.1 probable WRKY transcription factor 35 [Oryza sativa Japonica Group]	-	-	GO:0003700//transcription factor activity, sequence-specific DNA binding;GO:0043565//sequence-specific DNA binding	GO:0006355//regulation of transcription, DNA-templated
SK1G00063548	83.487	192.09	1.20216	6.66633e-17	3.41838e-15	MST3	-	-	-	XP_015646448.1 sugar transport protein MST3 [Oryza sativa Japonica Group]	-	GO:0005887//integral component of plasma membrane;GO:0016021//integral component of membrane	GO:0015114//phosphate ion transmembrane transporter activity;GO:0015295//solute:proton symporter activity;GO:0015307//drug:proton antiporter activity;GO:0022857//transmembrane transporter activity;GO:0042910//xenobiotic transporter activity;GO:0051119//sugar transmembrane transporter activity	GO:0006810//transport;GO:0006817//phosphate ion transport;GO:0006855//drug transmembrane transport;GO:0008643//carbohydrate transport;GO:0042493//response to drug;GO:0042908//xenobiotic transport;GO:0055085//transmembrane transport
SK1G00062941	9.361	4.111	-1.18717	7.71241e-17	3.92695e-15	MED33A	-	-	-	EAZ03202.1 hypothetical protein OsI_25353 [Oryza sativa Indica Group]	-	-	-	-
SK1G00068146	6.336	24.1883	1.93267	7.8423e-17	3.98607e-15	XA21	-	-	-	EAY80115.1 hypothetical protein OsI_35287 [Oryza sativa Indica Group]	-	-	GO:0004672//protein kinase activity;GO:0005515//protein binding;GO:0005524//ATP binding	GO:0006468//protein phosphorylation
SK1G00041848	32.28	14.253	-1.17937	8.89677e-17	4.49046e-15	--	-	-	-	XP_015626165.1 uncharacterized protein LOC4325843 [Oryza sativa Japonica Group]	-	-	-	-
SK1G00053535	4.01	11.57	1.52871	8.95599e-17	4.51248e-15	MST1	-	-	-	OEL16619.1 Sugar transport protein 5 [Dichanthelium oligosanthes]	-	GO:0005887//integral component of plasma membrane;GO:0016021//integral component of membrane	GO:0008028//monocarboxylic acid transmembrane transporter activity;GO:0015238//drug transmembrane transporter activity;GO:0015295//solute:proton symporter activity;GO:0022857//transmembrane transporter activity;GO:0042910//xenobiotic transporter activity;GO:0051119//sugar transmembrane transporter activity	GO:0006810//transport;GO:0008643//carbohydrate transport;GO:0015718//monocarboxylic acid transport;GO:0015893//drug transport;GO:0042908//xenobiotic transport;GO:0055085//transmembrane transport
SK1G00068125	0.031	3.29067	6.72997	9.15541e-17	4.60493e-15	ERF110	-	-	-	KAB8114366.1 hypothetical protein EE612_053731 [Oryza sativa]	-	-	GO:0003700//transcription factor activity, sequence-specific DNA binding	GO:0006355//regulation of transcription, DNA-templated
SK1G00046794	43.064	20.3173	-1.08377	9.6073e-17	4.82383e-15	MEKK1	Organismal Systems;Environmental Information Processing	Environmental adaptation;Signal transduction	K13414;K13414	XP_015633020.1 mitogen-activated protein kinase kinase kinase 1 [Oryza sativa Japonica Group]	ko04626//Plant-pathogen interaction;ko04016//MAPK signaling pathway - plant	-	GO:0004672//protein kinase activity;GO:0005524//ATP binding	GO:0006468//protein phosphorylation
SK1G00074365	15.278	40.229	1.39678	1.03288e-16	5.16817e-15	BHLH130	-	-	-	EAZ09563.1 hypothetical protein OsI_31842 [Oryza sativa Indica Group]	-	-	GO:0046983//protein dimerization activity	-
SK1G00052363	0.111	1.048	3.23901	1.05651e-16	5.25908e-15	AtMg00310	-	-	-	EEE66057.1 hypothetical protein OsJ_22054 [Oryza sativa Japonica Group]	-	-	GO:0003676//nucleic acid binding;GO:0003964//RNA-directed DNA polymerase activity;GO:0004523//RNA-DNA hybrid ribonuclease activity	GO:0000373//Group II intron splicing
SK1G00050901	2.671	8.924	1.74031	1.12489e-16	5.57071e-15	ATL32	-	-	-	EAY85203.1 hypothetical protein OsI_06566 [Oryza sativa Indica Group]	-	GO:0000109//nucleotide-excision repair complex;GO:0005680//anaphase-promoting complex	GO:0008270//zinc ion binding;GO:0046872//metal ion binding;GO:0061630//ubiquitin protein ligase activity;GO:0097602//cullin family protein binding	GO:0006289//nucleotide-excision repair;GO:0031145//anaphase-promoting complex-dependent proteasomal ubiquitin-dependent protein catabolic process
MSTRG.22804	3.09	0.799	-1.95134	1.17341e-16	5.77148e-15	At3g03770	-	-	-	probable inactive leucine-rich repeat receptor-like protein kinase At3g03770 [Oryza sativa Japonica Group]	-	-	-	-
SK1G00043895	221.466	517.28	1.22386	1.18047e-16	5.78733e-15	SNF4	-	-	-	XP_015630980.1 sucrose nonfermenting 4-like protein [Oryza sativa Japonica Group]	-	GO:0005840//ribosome;GO:0022626//cytosolic ribosome	GO:0045182//translation regulator activity	GO:0009386//translational attenuation;GO:0044238//primary metabolic process
SK1G00065008	1.18	4.89867	2.0536	1.18064e-16	5.78733e-15	XA21	-	-	-	KAF2919201.1 hypothetical protein DAI22_08g116200 [Oryza sativa Japonica Group]	-	-	GO:0004672//protein kinase activity;GO:0005515//protein binding;GO:0005524//ATP binding;GO:0016747//transferase activity, transferring acyl groups other than amino-acyl groups	GO:0006468//protein phosphorylation
SK1G00046559	288.96	121.963	-1.24443	1.24109e-16	6.03253e-15	--	-	-	-	EAY89669.1 hypothetical protein OsI_11202 [Oryza sativa Indica Group]	-	GO:0005680//anaphase-promoting complex	GO:0003723//RNA binding;GO:0008270//zinc ion binding;GO:0046872//metal ion binding;GO:0061630//ubiquitin protein ligase activity;GO:0097602//cullin family protein binding	GO:0031145//anaphase-promoting complex-dependent proteasomal ubiquitin-dependent protein catabolic process
SK1G00050246	2.762	7.34667	1.41138	1.29884e-16	6.28157e-15	--	-	-	-	XP_015624429.1 SH3 domain-containing protein C23A1.17-like [Oryza sativa Japonica Group]	-	-	-	GO:0007283//spermatogenesis
SK1G00057135	6.76	3.13667	-1.10779	1.37126e-16	6.6097e-15	AGDP1	-	-	-	KAB8102986.1 hypothetical protein EE612_035160 [Oryza sativa]	-	-	-	-
SK1G00065312	6.048	19.709	1.70432	1.39211e-16	6.69902e-15	At5g05600	-	-	-	EAZ06062.1 hypothetical protein OsI_28301 [Oryza sativa Indica Group]	-	-	GO:0016491//oxidoreductase activity	GO:0055114//oxidation-reduction process
SK1G00061583	2	5.31667	1.41052	1.4255e-16	6.82562e-15	--	-	-	-	EEC82297.1 hypothetical protein OsI_26545 [Oryza sativa Indica Group]	-	-	GO:0009055//electron carrier activity	-
SK1G00043427	4.684	13.387	1.51502	1.45086e-16	6.9234e-15	RNFT2	-	-	-	EAY72692.1 hypothetical protein OsI_00559 [Oryza sativa Indica Group]	-	GO:0000109//nucleotide-excision repair complex;GO:0005680//anaphase-promoting complex	GO:0008270//zinc ion binding;GO:0046872//metal ion binding;GO:0061630//ubiquitin protein ligase activity;GO:0097602//cullin family protein binding	GO:0006289//nucleotide-excision repair;GO:0031145//anaphase-promoting complex-dependent proteasomal ubiquitin-dependent protein catabolic process
SK1G00073926	10.978	24.5533	1.1613	1.4531e-16	6.9234e-15	HAK17	-	-	-	EEC84674.1 hypothetical protein OsI_31583 [Oryza sativa Indica Group]	-	GO:0016020//membrane	GO:0015079//potassium ion transmembrane transporter activity	GO:0006813//potassium ion transport;GO:0071805//potassium ion transmembrane transport
SK1G00061852	5.277	16.117	1.61079	1.4693e-16	6.97761e-15	CRK6	-	-	-	EEC82219.1 hypothetical protein OsI_26367 [Oryza sativa Indica Group]	-	-	GO:0004672//protein kinase activity;GO:0005524//ATP binding	GO:0006468//protein phosphorylation
SK1G00049559	60.423	161.082	1.41462	1.59878e-16	7.55526e-15	GAPC3	Metabolism;Metabolism;Metabolism;Metabolism;Metabolism;Metabolism	Global and overview maps;Global and overview maps;Global and overview maps;Global and overview maps;Carbohydrate metabolism;Energy metabolism	K00134;K00134;K00134;K00134;K00134;K00134	XP_015625382.1 glyceraldehyde-3-phosphate dehydrogenase 3, cytosolic [Oryza sativa Japonica Group]	ko01100//Metabolic pathways;ko01110//Biosynthesis of secondary metabolites;ko01200//Carbon metabolism;ko01230//Biosynthesis of amino acids;ko00010//Glycolysis / Gluconeogenesis;ko00710//Carbon fixation in photosynthetic organisms	-	GO:0004073//aspartate-semialdehyde dehydrogenase activity;GO:0004617//phosphoglycerate dehydrogenase activity;GO:0008839//4-hydroxy-tetrahydrodipicolinate reductase;GO:0016620//oxidoreductase activity, acting on the aldehyde or oxo group of donors, NAD or NADP as acceptor;GO:0047850//diaminopimelate dehydrogenase activity;GO:0048001//erythrose-4-phosphate dehydrogenase activity;GO:0050112//inosit…	GO:0006094//gluconeogenesis;GO:0006096//glycolytic process;GO:0006564//L-serine biosynthetic process;GO:0008615//pyridoxine biosynthetic process;GO:0009085//lysine biosynthetic process;GO:0009086//methionine biosynthetic process;GO:0009088//threonine biosynthetic process;GO:0009089//lysine biosynthetic process via diaminopimelate;GO:0009097//isoleucine biosynthetic process;GO:0019310//inositol ca…
SK1G00051214	4.033	9.322	1.20879	1.64785e-16	7.7618e-15	At4g34480	-	-	-	EEC72694.1 hypothetical protein OsI_06270 [Oryza sativa Indica Group]	-	-	GO:0004553//hydrolase activity, hydrolyzing O-glycosyl compounds	GO:0005975//carbohydrate metabolic process
SK1G00047743	2.035	7.616	1.904	1.66775e-16	7.83003e-15	WAV3	-	-	-	XP_015627812.1 E3 ubiquitin-protein ligase WAV3 [Oryza sativa Japonica Group]	-	GO:0005680//anaphase-promoting complex;GO:0010007//magnesium chelatase complex	GO:0008270//zinc ion binding;GO:0016851//magnesium chelatase activity;GO:0016887//ATPase activity;GO:0046872//metal ion binding;GO:0061630//ubiquitin protein ligase activity;GO:0097602//cullin family protein binding	GO:0015995//chlorophyll biosynthetic process;GO:0031145//anaphase-promoting complex-dependent proteasomal ubiquitin-dependent protein catabolic process
SK1G00041363	9.161	3.67433	-1.31802	1.71169e-16	7.99739e-15	SNL6	-	-	-	KAB8082629.1 hypothetical protein EE612_004583 [Oryza sativa]	-	-	GO:0003824//catalytic activity;GO:0003854//3-beta-hydroxy-delta5-steroid dehydrogenase activity;GO:0004316//3-oxoacyl-[acyl-carrier-protein] reductase (NADPH) activity;GO:0008831//dTDP-4-dehydrorhamnose reductase activity;GO:0016616//oxidoreductase activity, acting on the CH-OH group of donors, NAD or NADP as acceptor;GO:0016757//transferase activity, transferring glycosyl groups	GO:0005975//carbohydrate metabolic process;GO:0006633//fatty acid biosynthetic process;GO:0006694//steroid biosynthetic process;GO:0009243//O antigen biosynthetic process;GO:0019305//dTDP-rhamnose biosynthetic process;GO:0055114//oxidation-reduction process
SK1G00058360	14.056	4.29233	-1.71135	1.78185e-16	8.29838e-15	APG	Environmental Information Processing;Organismal Systems	Signal transduction;Environmental adaptation	K12126;K12126	XP_015638282.1 transcription factor APG isoform X2 [Oryza sativa Japonica Group]	ko04075//Plant hormone signal transduction;ko04712//Circadian rhythm - plant	GO:0019028//viral capsid	GO:0046983//protein dimerization activity	-
SK1G00074074	16.478	6.77633	-1.28196	1.88114e-16	8.71866e-15	CYP707A7	Metabolism	Metabolism of terpenoids and polyketides	K09843	A2Z212.1 RecName: Full=Abscisic acid 8'-hydroxylase 3; Short=ABA 8'-hydroxylase 3; AltName: Full=Cytochrome P450 707A7; AltName: Full=OsABA8ox3 [Oryza sativa Indica Group]	ko00906//Carotenoid biosynthesis	-	GO:0005506//iron ion binding;GO:0016705//oxidoreductase activity, acting on paired donors, with incorporation or reduction of molecular oxygen;GO:0020037//heme binding	GO:0055114//oxidation-reduction process
SK1G00057670	0.158	2.22467	3.81559	1.8844e-16	8.71979e-15	A	-	-	-	XP_015641694.1 putative anthocyanidin reductase isoform X4 [Oryza sativa Japonica Group]	-	-	GO:0003824//catalytic activity;GO:0003854//3-beta-hydroxy-delta5-steroid dehydrogenase activity;GO:0003978//UDP-glucose 4-epimerase activity;GO:0004043//L-aminoadipate-semialdehyde dehydrogenase activity;GO:0008446//GDP-mannose 4,6-dehydratase activity;GO:0008667//2,3-dihydro-2,3-dihydroxybenzoate dehydrogenase activity;GO:0016616//oxidoreductase activity, acting on the CH-OH group of donors, NAD…	GO:0000271//polysaccharide biosynthetic process;GO:0005975//carbohydrate metabolic process;GO:0006012//galactose metabolic process;GO:0006694//steroid biosynthetic process;GO:0008152//metabolic process;GO:0009243//O antigen biosynthetic process;GO:0019878//lysine biosynthetic process via aminoadipic acid;GO:0055114//oxidation-reduction process
SK1G00056626	8.399	17.5573	1.06378	2.0857e-16	9.58991e-15	--	-	-	-	KAB8102401.1 hypothetical protein EE612_033926, partial [Oryza sativa]	-	-	-	-
SK1G00050968	1.104	4.35667	1.98048	2.14604e-16	9.82052e-15	HSL1	-	-	-	EAY85085.1 hypothetical protein OsI_06441 [Oryza sativa Indica Group]	-	GO:0005887//integral component of plasma membrane	GO:0004672//protein kinase activity;GO:0005515//protein binding;GO:0005524//ATP binding	GO:0006468//protein phosphorylation
SK1G00062348	4.395	1.19633	-1.87724	2.18333e-16	9.97539e-15	At2g33280	-	-	-	XP_015645033.1 probable folate-biopterin transporter 9, chloroplastic isoform X1 [Oryza sativa Japonica Group]	-	-	-	-
SK1G00061051	48.615	120.415	1.30854	2.21086e-16	1.00693e-14	spast	-	-	-	EEC82665.1 hypothetical protein OsI_27291 [Oryza sativa Indica Group]	-	GO:0000502//proteasome complex;GO:0009368//endopeptidase Clp complex;GO:0009379//Holliday junction helicase complex	GO:0003678//DNA helicase activity;GO:0003723//RNA binding;GO:0003724//RNA helicase activity;GO:0004176//ATP-dependent peptidase activity;GO:0004222//metalloendopeptidase activity;GO:0004252//serine-type endopeptidase activity;GO:0005524//ATP binding;GO:0008134//transcription factor binding;GO:0009378//four-way junction helicase activity;GO:0016818//hydrolase activity, acting on acid anhydrides, i…	GO:0002949//tRNA threonylcarbamoyladenosine modification;GO:0006281//DNA repair;GO:0006310//DNA recombination;GO:0006355//regulation of transcription, DNA-templated;GO:0006457//protein folding;GO:0006508//proteolysis;GO:0009306//protein secretion;GO:0010498//proteasomal protein catabolic process;GO:0019941//modification-dependent protein catabolic process;GO:0032297//negative regulation of DNA-de…
SK1G00058032	13.605	31.205	1.19764	2.32733e-16	1.05334e-14	MKP1	-	-	-	XP_015639710.1 protein-tyrosine-phosphatase MKP1 isoform X1 [Oryza sativa Japonica Group]	-	-	GO:0004725//protein tyrosine phosphatase activity	GO:0006470//protein dephosphorylation
SK1G00042270	2.9	8.12567	1.48643	2.40042e-16	1.08473e-14	--	-	-	-	-	-	-	-	-
SK1G00049982	0.116	0.682	2.55565	2.47628e-16	1.11726e-14	SAP5	-	-	-	CAH67225.1 OSIGBa0145M07.7 [Oryza sativa]	-	-	GO:0003677//DNA binding;GO:0008270//zinc ion binding	-
SK1G00059193	39.209	19.1157	-1.03643	2.78992e-16	1.25485e-14	FER	-	-	-	XP_015638297.1 receptor-like protein kinase FERONIA [Oryza sativa Japonica Group]	-	-	GO:0004672//protein kinase activity;GO:0005524//ATP binding	GO:0006468//protein phosphorylation
SK1G00048987	23.412	9.36367	-1.3221	2.80537e-16	1.25789e-14	At4g09580	-	-	-	EEC73822.1 hypothetical protein OsI_08546 [Oryza sativa Indica Group]	-	-	-	-
SK1G00040213	151.133	49.739	-1.60337	2.87633e-16	1.28771e-14	WRKY24	Organismal Systems;Environmental Information Processing	Environmental adaptation;Signal transduction	K13424;K13424	Q6B6R4.1 RecName: Full=WRKY transcription factor WRKY24; Short=OsWRKY24 [Oryza sativa Indica Group]	ko04626//Plant-pathogen interaction;ko04016//MAPK signaling pathway - plant	-	GO:0003700//transcription factor activity, sequence-specific DNA binding;GO:0043565//sequence-specific DNA binding	GO:0006355//regulation of transcription, DNA-templated
SK1G00052626	16.629	6.47133	-1.36157	2.92897e-16	1.30925e-14	Os04g0282400	-	-	-	KAB8095114.1 hypothetical protein EE612_022794 [Oryza sativa]	-	-	-	-
SK1G00043241	45.839	115.925	1.33854	3.14131e-16	1.3946e-14	CAT5	-	-	-	XP_015621666.1 cationic amino acid transporter 5 [Oryza sativa Japonica Group]	-	GO:0005887//integral component of plasma membrane;GO:0016020//membrane;GO:0016021//integral component of membrane	GO:0005275//amine transmembrane transporter activity;GO:0015171//amino acid transmembrane transporter activity;GO:0015495//gamma-aminobutyric acid:proton symporter activity;GO:0022857//transmembrane transporter activity	GO:0006810//transport;GO:0006865//amino acid transport;GO:0009450//gamma-aminobutyric acid catabolic process;GO:0009847//spore germination;GO:0015837//amine transport;GO:0055085//transmembrane transport
SK1G00065809	74.155	31.142	-1.25168	3.40853e-16	1.50272e-14	LSD1	-	-	-	Q0J7V9.1 RecName: Full=Protein LSD1; AltName: Full=Protein LESION SIMULATING DISEASE 1; Short=OsLSD1; AltName: Full=Putative zinc finger LSD1 [Oryza sativa Japonica Group]	-	-	-	-
SK1G00053409	18.19	7.16933	-1.34323	3.45552e-16	1.5188e-14	TCHQD	-	-	-	CAZ68077.1 tetrachlorohydroquinone dehalogenase [Oryza sativa Indica Group]	-	-	GO:0005515//protein binding;GO:0016034//maleylacetoacetate isomerase activity	GO:0006559//L-phenylalanine catabolic process;GO:0006572//tyrosine catabolic process;GO:0006749//glutathione metabolic process
SK1G00072929	2.04	5.267	1.36841	3.46112e-16	1.51895e-14	Tf2-12	-	-	-	ABA97970.1 retrotransposon protein, putative, unclassified, expressed [Oryza sativa Japonica Group]	-	-	-	GO:0015074//DNA integration
SK1G00070965	4.944	2.00367	-1.30304	3.58796e-16	1.56986e-14	BETA-OHASE	Metabolism;Metabolism;Metabolism	Global and overview maps;Global and overview maps;Metabolism of terpenoids and polyketides	K15746;K15746;K15746	EAY79324.1 hypothetical protein OsI_34454 [Oryza sativa Indica Group]	ko01100//Metabolic pathways;ko01110//Biosynthesis of secondary metabolites;ko00906//Carotenoid biosynthesis	-	GO:0005506//iron ion binding;GO:0016491//oxidoreductase activity	GO:0008610//lipid biosynthetic process;GO:0055114//oxidation-reduction process
SK1G00063397	43.901	101.54	1.20973	3.64215e-16	1.59116e-14	ERD4	-	-	-	EAZ02783.1 hypothetical protein OsI_24908 [Oryza sativa Indica Group]	-	GO:0016020//membrane;GO:0016021//integral component of membrane	GO:0004176//ATP-dependent peptidase activity;GO:0004222//metalloendopeptidase activity;GO:0005524//ATP binding;GO:0008270//zinc ion binding	-
SK1G00051233	6.157	2.112	-1.54362	3.73964e-16	1.62883e-14	SIT2	Organismal Systems	Environmental adaptation	K16241	BAF08150.1 Os02g0203000 [Oryza sativa Japonica Group]	ko04712//Circadian rhythm - plant	GO:0030867//rough endoplasmic reticulum membrane;GO:0031514//motile cilium	GO:0003677//DNA binding;GO:0003700//transcription factor activity, sequence-specific DNA binding;GO:0004674//protein serine/threonine kinase activity;GO:0005524//ATP binding;GO:0030246//carbohydrate binding	GO:0006355//regulation of transcription, DNA-templated;GO:0006357//regulation of transcription from RNA polymerase II promoter;GO:0006468//protein phosphorylation;GO:0007059//chromosome segregation;GO:0023041//neuronal signal transduction;GO:0030261//chromosome condensation;GO:0048870//cell motility
SK1G00057862	0.551	1.43367	1.37959	3.74722e-16	1.62967e-14	PSY1R	-	-	-	EAZ02182.1 hypothetical protein OsI_24273 [Oryza sativa Indica Group]	-	-	GO:0004672//protein kinase activity;GO:0005515//protein binding;GO:0005524//ATP binding;GO:0016884//carbon-nitrogen ligase activity, with glutamine as amido-N-donor	GO:0006468//protein phosphorylation
SK1G00044090	6.587	13.8083	1.06785	3.83482e-16	1.66277e-14	--	-	-	-	XP_015628132.1 uncharacterized protein LOC4334508 [Oryza sativa Japonica Group]	-	-	-	-
SK1G00040066	9.591	4.44067	-1.1109	4.01482e-16	1.73561e-14	BLH9	-	-	-	ABW97410.1 putative transcription factor qSH-1 [Oryza sativa Indica Group]	-	-	GO:0003677//DNA binding	GO:0006355//regulation of transcription, DNA-templated
SK1G00071042	1.095	5.32	2.2805	4.65247e-16	1.99339e-14	SMR1	-	-	-	XP_015614427.1 cyclin-dependent protein kinase inhibitor SMR1 [Oryza sativa Japonica Group]	-	-	-	-
SK1G00065974	11.48	23.4007	1.02743	4.69366e-16	2.0051e-14	FBA1	Metabolism;Metabolism;Metabolism;Metabolism;Metabolism;Metabolism;Metabolism;Metabolism	Global and overview maps;Global and overview maps;Global and overview maps;Global and overview maps;Carbohydrate metabolism;Energy metabolism;Carbohydrate metabolism;Carbohydrate metabolism	K01623;K01623;K01623;K01623;K01623;K01623;K01623;K01623	XP_015649702.1 fructose-bisphosphate aldolase 6, cytosolic [Oryza sativa Japonica Group]	ko01100//Metabolic pathways;ko01110//Biosynthesis of secondary metabolites;ko01200//Carbon metabolism;ko01230//Biosynthesis of amino acids;ko00010//Glycolysis / Gluconeogenesis;ko00710//Carbon fixation in photosynthetic organisms;ko00051//Fructose and mannose metabolism;ko00030//Pentose phosphate pathway	-	GO:0004332//fructose-bisphosphate aldolase activity	GO:0006096//glycolytic process
SK1G00039985	15.756	36.9567	1.22993	4.75235e-16	2.02419e-14	CHIT3	Metabolism;Metabolism	Global and overview maps;Carbohydrate metabolism	K01183;K01183	PHT74588.1 Acidic endochitinase [Capsicum annuum]	ko01100//Metabolic pathways;ko00520//Amino sugar and nucleotide sugar metabolism	-	-	GO:0005975//carbohydrate metabolic process
SK1G00065192	2.095	0.511	-2.03556	4.8226e-16	2.05109e-14	Os11g0303600	-	-	-	EAZ06416.1 hypothetical protein OsI_28646 [Oryza sativa Indica Group]	-	-	GO:0008168//methyltransferase activity;GO:0008171//O-methyltransferase activity;GO:0008757//S-adenosylmethionine-dependent methyltransferase activity;GO:0046983//protein dimerization activity	GO:0006412//translation;GO:0008299//isoprenoid biosynthetic process;GO:0009102//biotin biosynthetic process;GO:0016051//carbohydrate biosynthetic process;GO:0018364//peptidyl-glutamine methylation
SK1G00046780	38.349	91.137	1.24885	4.98092e-16	2.11532e-14	PYL4	Environmental Information Processing;Environmental Information Processing	Signal transduction;Signal transduction	K14496;K14496	AIX10776.1 ABA receptor 6, partial [Oryza sativa Indica Group]	ko04075//Plant hormone signal transduction;ko04016//MAPK signaling pathway - plant	-	-	GO:0006952//defense response
SK1G00067987	12.041	26.3287	1.12868	5.66855e-16	2.38285e-14	--	-	-	-	EEC67844.1 hypothetical protein OsI_35458 [Oryza sativa Indica Group]	-	-	-	-
SK1G00055606	2.318	5.44267	1.23143	5.72566e-16	2.39988e-14	CTR1	-	-	-	XP_015643846.1 uncharacterized protein LOC4340309 [Oryza sativa Japonica Group]	-	-	GO:0004672//protein kinase activity;GO:0005515//protein binding;GO:0005524//ATP binding	GO:0006468//protein phosphorylation
SK1G00064083	7.876	23.1667	1.55652	6.12098e-16	2.55816e-14	RFS1	Metabolism;Metabolism	Global and overview maps;Carbohydrate metabolism	K06617;K06617	XP_015648149.1 probable galactinol--sucrose galactosyltransferase 1 [Oryza sativa Japonica Group]	ko01100//Metabolic pathways;ko00052//Galactose metabolism	-	-	-
SK1G00049872	34.539	71.0717	1.04105	6.36325e-16	2.65281e-14	SAPK6	Environmental Information Processing;Environmental Information Processing	Signal transduction;Signal transduction	K14498;K14498	EEC73377.1 hypothetical protein OsI_07615 [Oryza sativa Indica Group]	ko04075//Plant hormone signal transduction;ko04016//MAPK signaling pathway - plant	-	GO:0004672//protein kinase activity;GO:0005524//ATP binding	GO:0006468//protein phosphorylation
SK1G00072483	11.47	37.7483	1.71855	6.36578e-16	2.65281e-14	--	-	-	-	-	-	-	-	-
SK1G00062142	8.648	19.4437	1.16886	7.06675e-16	2.91551e-14	VAD1	-	-	-	XP_015647624.1 protein VASCULAR ASSOCIATED DEATH 1, chloroplastic isoform X2 [Oryza sativa Japonica Group]	-	-	-	-
SK1G00070576	19.017	43.199	1.18371	7.49888e-16	3.085e-14	BC10	-	-	-	XP_015620572.1 uncharacterized protein LOC4352812 [Oryza sativa Japonica Group]	-	GO:0016020//membrane	GO:0016757//transferase activity, transferring glycosyl groups	-
SK1G00048228	153.8	56.3533	-1.44848	7.53231e-16	3.09435e-14	GATA8	-	-	-	XP_015626107.1 GATA transcription factor 11 [Oryza sativa Japonica Group]	-	-	GO:0008270//zinc ion binding;GO:0043565//sequence-specific DNA binding	GO:0006355//regulation of transcription, DNA-templated
SK1G00040793	4.776	14.027	1.55433	8.15673e-16	3.34137e-14	--	-	-	-	EAY75716.1 hypothetical protein OsI_03627 [Oryza sativa Indica Group]	-	-	-	GO:0030638//polyketide metabolic process
MSTRG.283	0.159	1.56833	3.30213	8.72688e-16	3.56987e-14	--	-	-	-	Os01g0912800 [Oryza sativa Japonica Group]	-	-	-	-
SK1G00045895	19.208	39.853	1.05298	9.22943e-16	3.7595e-14	EDL2	-	-	-	XP_015630432.1 EID1-like F-box protein 2 [Oryza sativa Japonica Group]	-	-	-	-
SK1G00068958	1.848	4.90267	1.4076	9.35542e-16	3.80546e-14	--	-	-	-	EAY82425.1 hypothetical protein OsI_37638 [Oryza sativa Indica Group]	-	-	-	-
SK1G00060012	1.951	0.959333	-1.02411	9.77808e-16	3.96067e-14	pom1	-	-	-	EEC79373.1 hypothetical protein OsI_20272 [Oryza sativa Indica Group]	-	-	GO:0004672//protein kinase activity;GO:0005524//ATP binding	GO:0006468//protein phosphorylation
SK1G00043694	33.335	99.4563	1.57703	1.07655e-15	4.3424e-14	--	-	-	-	EAY72397.1 hypothetical protein OsI_00250 [Oryza sativa Indica Group]	-	-	-	-
SK1G00052963	0.647	2.23	1.78521	1.11596e-15	4.48884e-14	--	-	-	-	BAD25083.1 hypothetical protein [Oryza sativa Japonica Group]	-	-	-	-
SK1G00044768	101.662	206.783	1.02434	1.17746e-15	4.70348e-14	GAD1	Metabolism;Metabolism;Metabolism;Metabolism;Metabolism;Metabolism	Global and overview maps;Global and overview maps;Amino acid metabolism;Metabolism of other amino acids;Carbohydrate metabolism;Metabolism of other amino acids	K01580;K01580;K01580;K01580;K01580;K01580	AAM47304.1 putative glutamate carboxylase [Oryza sativa Japonica Group]	ko01100//Metabolic pathways;ko01110//Biosynthesis of secondary metabolites;ko00250//Alanine, aspartate and glutamate metabolism;ko00410//beta-Alanine metabolism;ko00650//Butanoate metabolism;ko00430//Taurine and hypotaurine metabolism	-	GO:0004351//glutamate decarboxylase activity;GO:0004837//tyrosine decarboxylase activity;GO:0016831//carboxy-lyase activity;GO:0030170//pyridoxal phosphate binding	GO:0006540//glutamate decarboxylation to succinate;GO:0015940//pantothenate biosynthetic process;GO:0019752//carboxylic acid metabolic process;GO:0051188//cofactor biosynthetic process
SK1G00054918	7.795	28.5297	1.87184	1.2324e-15	4.89268e-14	AAE5	-	-	-	CAH68190.1 H0403D02.18 [Oryza sativa]	-	-	GO:0003987//acetate-CoA ligase activity;GO:0004043//L-aminoadipate-semialdehyde dehydrogenase activity;GO:0008668//(2,3-dihydroxybenzoyl)adenylate synthase activity;GO:0008756//o-succinylbenzoate-CoA ligase activity;GO:0030729//acetoacetate-CoA ligase activity;GO:0047473//D-alanine-poly(phosphoribitol) ligase activity;GO:0050218//propionate-CoA ligase activity	GO:0009234//menaquinone biosynthetic process;GO:0019287//isopentenyl diphosphate biosynthetic process, mevalonate pathway;GO:0019290//siderophore biosynthetic process;GO:0019350//teichoic acid biosynthetic process;GO:0019427//acetyl-CoA biosynthetic process from acetate;GO:0019878//lysine biosynthetic process via aminoadipic acid
SK1G00059376	311.495	656.765	1.07617	1.35181e-15	5.34094e-14	PHOS32	-	-	-	XP_015640188.1 universal stress protein PHOS32 [Oryza sativa Japonica Group]	-	-	-	-
SK1G00071591	4.771	11.1593	1.22589	1.39423e-15	5.48606e-14	--	-	-	-	XP_015614648.1 uncharacterized protein LOC4348744 [Oryza sativa Japonica Group]	-	-	-	-
SK1G00048183	140.776	59.7193	-1.23713	1.51226e-15	5.92631e-14	DESI1	-	-	-	KAB8089469.1 hypothetical protein EE612_014428 [Oryza sativa]	-	-	GO:0008233//peptidase activity	-
SK1G00074786	8.527	4.058	-1.07127	1.52119e-15	5.93715e-14	SAG12	-	-	-	XP_015611285.1 ervatamin-B [Oryza sativa Japonica Group]	-	-	GO:0008234//cysteine-type peptidase activity	GO:0006508//proteolysis
SK1G00057432	101.258	46.9767	-1.10802	1.7232e-15	6.7075e-14	dnaJ	-	-	-	EAZ01899.1 hypothetical protein OsI_23925 [Oryza sativa Indica Group]	-	-	GO:0005515//protein binding	GO:0006457//protein folding;GO:0009408//response to heat
SK1G00053407	7.012	28.777	2.03702	1.72689e-15	6.71282e-14	BAT1	-	-	-	XP_015635846.1 amino-acid permease BAT1 homolog [Oryza sativa Japonica Group]	-	GO:0016020//membrane	GO:0022857//transmembrane transporter activity	GO:0055085//transmembrane transport
SK1G00049610	2.679	0.627	-2.09516	1.80601e-15	6.96588e-14	At1g67900	-	-	-	EAY86511.1 hypothetical protein OsI_07890 [Oryza sativa Indica Group]	-	-	-	-
SK1G00053455	3.903	12.8737	1.72177	1.80649e-15	6.96588e-14	KIN12A	-	-	-	CAE01489.1 P0041A24.1 [Oryza sativa Japonica Group]	-	-	GO:0005524//ATP binding;GO:0008017//microtubule binding	GO:0007018//microtubule-based movement
SK1G00073214	0.813	5.27333	2.69739	1.82787e-15	7.02976e-14	--	-	-	-	EEC84308.1 hypothetical protein OsI_30800 [Oryza sativa Indica Group]	-	-	-	-
SK1G00058208	9.341	19.5763	1.06746	2.02705e-15	7.72388e-14	Os05g0125500	Metabolism;Metabolism	Global and overview maps;Amino acid metabolism	K00253;K00253	OEL38099.1 Isovaleryl-CoA dehydrogenase, mitochondrial [Dichanthelium oligosanthes]	ko01100//Metabolic pathways;ko00280//Valine, leucine and isoleucine degradation	-	GO:0016491//oxidoreductase activity;GO:0016627//oxidoreductase activity, acting on the CH-CH group of donors;GO:0018515//pimeloyl-CoA dehydrogenase activity	GO:0006790//sulfur compound metabolic process;GO:0055114//oxidation-reduction process
SK1G00043426	1.931	6.74167	1.80376	2.08028e-15	7.89552e-14	--	-	-	-	BAS70592.1 Os01g0168450, partial [Oryza sativa Japonica Group]	-	-	-	-
SK1G00050449	286.954	126.987	-1.17614	2.11837e-15	8.02954e-14	SNAP33	-	-	-	XP_015622819.1 SNAP25 homologous protein SNAP33 isoform X1 [Oryza sativa Japonica Group]	-	-	-	-
MSTRG.18617	1.008	6.11967	2.60196	2.42037e-15	9.06729e-14	--	-	-	-	hypothetical protein OsI_23507 [Oryza sativa Indica Group]	-	-	-	-
SK1G00048485	10.741	4.64267	-1.2101	2.44452e-15	9.14594e-14	--	Environmental Information Processing	Signal transduction	K14488	EAY87673.1 hypothetical protein OsI_09085 [Oryza sativa Indica Group]	ko04075//Plant hormone signal transduction	-	-	GO:0009733//response to auxin
SK1G00041269	3.531	1.20667	-1.54905	2.51851e-15	9.38632e-14	Os01g0656200	Environmental Information Processing;Environmental Information Processing	Signal transduction;Signal transduction	K14497;K14497	XP_015614087.1 probable protein phosphatase 2C 8 [Oryza sativa Japonica Group]	ko04075//Plant hormone signal transduction;ko04016//MAPK signaling pathway - plant	-	GO:0016791//phosphatase activity	-
SK1G00061731	12.489	29.5977	1.24483	2.53616e-15	9.42779e-14	ENT3	-	-	-	EEC82261.1 hypothetical protein OsI_26456 [Oryza sativa Indica Group]	-	GO:0016021//integral component of membrane	GO:0003964//RNA-directed DNA polymerase activity;GO:0005337//nucleoside transmembrane transporter activity	GO:0000373//Group II intron splicing;GO:1901642//nucleoside transmembrane transport
SK1G00044430	10.7	3.99067	-1.42291	2.60761e-15	9.68096e-14	FRAAL3718	-	-	-	XP_015628928.1 uncharacterized protein LOC4334283 [Oryza sativa Japonica Group]	-	-	GO:0008168//methyltransferase activity	GO:0032259//methylation
SK1G00039613	4.253	2.038	-1.06133	2.71317e-15	1.00471e-13	XRI1	-	-	-	EEC72039.1 hypothetical protein OsI_04941 [Oryza sativa Indica Group]	-	-	-	-
SK1G00069290	2.543	5.616	1.14301	2.77413e-15	1.02466e-13	CXE16	-	-	-	EAY82746.1 hypothetical protein OsI_37955 [Oryza sativa Indica Group]	-	-	GO:0016787//hydrolase activity	-
SK1G00059660	12.541	5.76967	-1.12009	2.83506e-15	1.04449e-13	CYP734A6	-	-	-	KAF2930720.1 hypothetical protein DAI22_05g157200 [Oryza sativa Japonica Group]	-	-	GO:0005506//iron ion binding;GO:0016705//oxidoreductase activity, acting on paired donors, with incorporation or reduction of molecular oxygen;GO:0020037//heme binding	GO:0055114//oxidation-reduction process
SK1G00063368	16.674	60.4017	1.85699	2.92173e-15	1.07369e-13	PIL13	Environmental Information Processing	Signal transduction	K16189	XP_015648043.1 transcription factor PHYTOCHROME INTERACTING FACTOR-LIKE 13-like isoform X1 [Oryza sativa Japonica Group]	ko04075//Plant hormone signal transduction	-	GO:0046983//protein dimerization activity	-
SK1G00047455	4.974	9.99267	1.00646	2.96882e-15	1.08961e-13	RAP2-6	-	-	-	XP_015630586.1 ethylene-responsive transcription factor ERF073 [Oryza sativa Japonica Group]	-	-	GO:0003700//transcription factor activity, sequence-specific DNA binding	GO:0006355//regulation of transcription, DNA-templated
SK1G00054257	10.851	4.08067	-1.41095	3.10339e-15	1.13611e-13	OFUT6	-	-	-	XP_015633360.1 O-fucosyltransferase 6 [Oryza sativa Japonica Group]	-	-	GO:0008714//AMP nucleosidase activity	GO:0046033//AMP metabolic process
SK1G00039922	342.517	139.31	-1.29787	3.14412e-15	1.14957e-13	PSBS1	Metabolism	Energy metabolism	K03542	XP_015621169.1 photosystem II 22 kDa protein, chloroplastic [Oryza sativa Japonica Group]	ko00195//Photosynthesis	-	-	-
SK1G00072482	1.684	9.75467	2.5342	3.17637e-15	1.1599e-13	WAK2	-	-	-	EEC66595.1 hypothetical protein OsI_32811 [Oryza sativa Indica Group]	-	GO:0016021//integral component of membrane	GO:0004672//protein kinase activity;GO:0004674//protein serine/threonine kinase activity;GO:0005509//calcium ion binding;GO:0005524//ATP binding;GO:0030247//polysaccharide binding	GO:0006468//protein phosphorylation
SK1G00048673	78.355	28.8307	-1.44242	3.58189e-15	1.2949e-13	FH16	-	-	-	XP_015625870.1 formin-like protein 16 [Oryza sativa Japonica Group]	-	-	-	GO:0006260//DNA replication
SK1G00051252	5.724	1.77467	-1.68948	3.64745e-15	1.31531e-13	UGT73E1	Metabolism;Metabolism	Global and overview maps;Metabolism of terpenoids and polyketides	K13496;K13496	XP_015623299.1 UDP-glycosyltransferase 73E1 [Oryza sativa Japonica Group]	ko01110//Biosynthesis of secondary metabolites;ko00908//Zeatin biosynthesis	GO:0005576//extracellular region	GO:0008194//UDP-glycosyltransferase activity	GO:0042157//lipoprotein metabolic process
SK1G00048661	21.334	7.22833	-1.56142	4.0274e-15	1.44871e-13	2MMP	-	-	-	EAY87473.1 hypothetical protein OsI_08881 [Oryza sativa Indica Group]	-	GO:0031012//extracellular matrix	GO:0004222//metalloendopeptidase activity;GO:0008233//peptidase activity;GO:0008237//metallopeptidase activity;GO:0008270//zinc ion binding	GO:0006508//proteolysis
SK1G00041195	136.231	55.2303	-1.30252	4.25001e-15	1.52122e-13	RABA1F	-	-	-	XP_015615400.1 ras-related protein RABA1f [Oryza sativa Japonica Group]	-	GO:0005737//cytoplasm	GO:0003677//DNA binding;GO:0003924//GTPase activity;GO:0005524//ATP binding;GO:0005525//GTP binding;GO:0016887//ATPase activity;GO:0017111//nucleoside-triphosphatase activity;GO:0043022//ribosome binding;GO:0051539//4 iron, 4 sulfur cluster binding	GO:0006400//tRNA modification;GO:0032508//DNA duplex unwinding;GO:0042254//ribosome biogenesis;GO:0051186//cofactor metabolic process
SK1G00054786	98.212	41.233	-1.2521	4.44299e-15	1.58373e-13	--	-	-	-	EAY95877.1 hypothetical protein OsI_17743 [Oryza sativa Indica Group]	-	-	GO:0005524//ATP binding	GO:0006629//lipid metabolic process
SK1G00070034	17.988	46.1273	1.35859	4.55004e-15	1.61462e-13	WRKY3	-	-	-	KAF2907970.1 hypothetical protein DAI22_12g140400 [Oryza sativa Japonica Group]	-	-	GO:0003700//transcription factor activity, sequence-specific DNA binding;GO:0043565//sequence-specific DNA binding	GO:0006355//regulation of transcription, DNA-templated
SK1G00043354	39.22	16.868	-1.2173	4.70711e-15	1.66423e-13	--	-	-	-	EAY72873.1 hypothetical protein OsI_00747 [Oryza sativa Indica Group]	-	-	-	-
SK1G00065207	2.548	19.4207	2.93016	4.80444e-15	1.69553e-13	TET7	-	-	-	EAZ06261.1 hypothetical protein OsI_28496 [Oryza sativa Indica Group]	-	GO:0016021//integral component of membrane	-	-
SK1G00047827	9.188	3.46333	-1.40759	4.80735e-15	1.69553e-13	SBT1.2	-	-	-	XP_015632924.1 subtilisin-like protease SBT1.2 [Oryza sativa Japonica Group]	-	-	GO:0008236//serine-type peptidase activity	GO:0006508//proteolysis;GO:0009306//protein secretion
SK1G00065233	4.583	9.703	1.08214	5.00679e-15	1.76372e-13	--	-	-	-	EAZ06283.1 hypothetical protein OsI_28520 [Oryza sativa Indica Group]	-	-	GO:0005515//protein binding	-
SK1G00069108	144.512	66.235	-1.12552	5.40738e-15	1.90021e-13	AAP3	-	-	-	EAY82481.1 hypothetical protein OsI_37698 [Oryza sativa Indica Group]	-	-	-	-
SK1G00058192	270.85	124.185	-1.12501	5.56727e-15	1.95165e-13	Os05g0128200	-	-	-	XP_015639743.1 zinc finger CCCH domain-containing protein 33 [Oryza sativa Japonica Group]	-	-	GO:0005515//protein binding;GO:0046872//metal ion binding	-
SK1G00046888	9.751	23.1507	1.24743	5.92185e-15	2.06096e-13	XB3	-	-	-	XP_015628044.1 E3 ubiquitin-protein ligase XB3-like [Oryza sativa Japonica Group]	-	-	GO:0005515//protein binding;GO:0046872//metal ion binding	-
SK1G00049468	0.42	1.173	1.48174	5.98617e-15	2.07834e-13	At3g47570	-	-	-	XP_015623990.1 receptor kinase-like protein Xa21 isoform X1 [Oryza sativa Japonica Group]	-	-	GO:0004413//homoserine kinase activity;GO:0004672//protein kinase activity;GO:0005515//protein binding;GO:0005524//ATP binding	GO:0006468//protein phosphorylation;GO:0009088//threonine biosynthetic process
SK1G00046101	7.861	3.24467	-1.27664	6.06651e-15	2.10119e-13	PAA1	-	-	-	EEC75388.1 hypothetical protein OsI_11856 [Oryza sativa Indica Group]	-	-	GO:0045340//mercury ion binding;GO:0046872//metal ion binding	GO:0015694//mercury ion transport
SK1G00064348	47.959	120.074	1.32405	6.25035e-15	2.15828e-13	dnaja1	-	-	-	EAZ42953.1 hypothetical protein OsJ_27541 [Oryza sativa Japonica Group]	-	-	GO:0005515//protein binding	GO:0006457//protein folding;GO:0009408//response to heat
SK1G00072772	0.621	2.752	2.14782	6.45579e-15	2.2148e-13	HRPN	Metabolism;Metabolism;Metabolism	Global and overview maps;Global and overview maps;Biosynthesis of other secondary metabolites	K00430;K00430;K00430	EAY77487.1 hypothetical protein OsI_32530 [Oryza sativa Indica Group]	ko01100//Metabolic pathways;ko01110//Biosynthesis of secondary metabolites;ko00940//Phenylpropanoid biosynthesis	-	GO:0004096//catalase activity;GO:0004601//peroxidase activity;GO:0020037//heme binding	GO:0006979//response to oxidative stress;GO:0055114//oxidation-reduction process
SK1G00049690	6.931	3.411	-1.02287	6.61544e-15	2.26689e-13	NPF6.4	-	-	-	BAD27632.1 putative RCH2 protein [Oryza sativa Japonica Group]	-	GO:0016020//membrane	GO:0015333//peptide:proton symporter activity;GO:0022857//transmembrane transporter activity	GO:0015833//peptide transport;GO:0055085//transmembrane transport
SK1G00073704	3.175	9.003	1.50365	6.67762e-15	2.28267e-13	At1g26850	-	-	-	EAZ09099.1 hypothetical protein OsI_31366 [Oryza sativa Indica Group]	-	-	GO:0008168//methyltransferase activity	GO:0008299//isoprenoid biosynthetic process
SK1G00067034	35.023	70.0943	1.001	6.82548e-15	2.32235e-13	Os11g0516000	Metabolism;Metabolism	Global and overview maps;Lipid metabolism	K00654;K00654	XP_015617901.1 long chain base biosynthesis protein 2a [Oryza sativa Japonica Group]	ko01100//Metabolic pathways;ko00600//Sphingolipid metabolism	-	GO:0003870//5-aminolevulinate synthase activity;GO:0008710//8-amino-7-oxononanoate synthase activity;GO:0008890//glycine C-acetyltransferase activity;GO:0016829//lyase activity;GO:0030170//pyridoxal phosphate binding	GO:0006520//cellular amino acid metabolic process;GO:0006567//threonine catabolic process;GO:0006783//heme biosynthetic process;GO:0009058//biosynthetic process;GO:0009102//biotin biosynthetic process;GO:0033617//mitochondrial respiratory chain complex IV assembly
SK1G00063188	3.894	12.851	1.72256	6.92595e-15	2.34825e-13	NFD4	-	-	-	EAZ03041.1 hypothetical protein OsI_25182 [Oryza sativa Indica Group]	-	-	GO:0003674//molecular_function;GO:0022857//transmembrane transporter activity	GO:0008150//biological_process;GO:0055085//transmembrane transport
SK1G00060895	13.337	27.2043	1.0284	7.30173e-15	2.4641e-13	NAC087	-	-	-	XP_015647863.1 NAC domain-containing protein 87 [Oryza sativa Japonica Group]	-	-	GO:0003677//DNA binding	GO:0006355//regulation of transcription, DNA-templated
SK1G00047040	4.362	2.04333	-1.09407	7.42493e-15	2.49693e-13	Os03g0232800	-	-	-	EEC74819.1 hypothetical protein OsI_10641 [Oryza sativa Indica Group]	-	-	GO:0008374//O-acyltransferase activity;GO:0016787//hydrolase activity	GO:0006629//lipid metabolic process
SK1G00043518	0.217	1.28567	2.56675	7.81127e-15	2.60265e-13	Os01g0140700	-	-	-	KAF2948315.1 hypothetical protein DAI22_01g027800 [Oryza sativa Japonica Group]	-	-	GO:0003677//DNA binding;GO:0003700//transcription factor activity, sequence-specific DNA binding	GO:0006355//regulation of transcription, DNA-templated
SK1G00043323	14.443	7.105	-1.02346	7.9443e-15	2.64089e-13	--	-	-	-	KAF2948840.1 hypothetical protein DAI22_01g064100 [Oryza sativa Japonica Group]	-	-	-	-
SK1G00040953	85.023	39.633	-1.10115	8.3336e-15	2.76394e-13	DDB_G0289029	Cellular Processes	Transport and catabolism	K19476	EAY75540.1 hypothetical protein OsI_03445 [Oryza sativa Indica Group]	ko04144//Endocytosis	-	-	GO:0015031//protein transport
SK1G00042705	9.914	3.15	-1.65412	8.77701e-15	2.89772e-13	--	-	-	-	XP_015619993.1 uncharacterized protein LOC4326913 isoform X4 [Oryza sativa Japonica Group]	-	-	-	-
SK1G00066434	13.542	27.7243	1.03371	9.43969e-15	3.0953e-13	Os11g0649700	-	-	-	XP_015615699.1 CASP-like protein 1U2 [Oryza sativa Japonica Group]	-	-	-	-
MSTRG.21733	181.534	90.7357	-1.0005	9.94106e-15	3.24132e-13	CPK20	Organismal Systems	Environmental adaptation	K13412	calcium-dependent protein kinase 20 [Oryza sativa Japonica Group]	ko04626//Plant-pathogen interaction	-	-	-
SK1G00071578	41.52	160.979	1.95499	1.01019e-14	3.28635e-13	LSI2	-	-	-	XP_015614851.1 silicon efflux transporter LSI2-like [Oryza sativa Japonica Group]	-	GO:0005887//integral component of plasma membrane;GO:0016021//integral component of membrane	GO:0008509//anion transmembrane transporter activity;GO:0015105//arsenite transmembrane transporter activity;GO:0015385//sodium:proton antiporter activity	GO:0006814//sodium ion transport;GO:0006818//hydrogen transport;GO:0006820//anion transport;GO:0015700//arsenite transport;GO:0046685//response to arsenic-containing substance;GO:0055085//transmembrane transport
SK1G00056679	1.058	3.40567	1.6866	1.03329e-14	3.35774e-13	CYP76M5	-	-	-	EAZ01073.1 hypothetical protein OsI_23102 [Oryza sativa Indica Group]	-	-	GO:0005506//iron ion binding;GO:0016705//oxidoreductase activity, acting on paired donors, with incorporation or reduction of molecular oxygen;GO:0020037//heme binding	GO:0055114//oxidation-reduction process
SK1G00057215	4.274	10.0227	1.22961	1.07577e-14	3.48401e-13	RPPL1	-	-	-	EEC80983.1 hypothetical protein OsI_23717 [Oryza sativa Indica Group]	-	-	GO:0005515//protein binding;GO:0043531//ADP binding	-
SK1G00070693	7.014	15.7647	1.16839	1.13663e-14	3.66472e-13	--	-	-	-	EAY84053.1 hypothetical protein OsI_39282 [Oryza sativa Indica Group]	-	GO:0005887//integral component of plasma membrane	GO:0015078//hydrogen ion transmembrane transporter activity;GO:0022857//transmembrane transporter activity	GO:0009405//pathogenesis;GO:0015992//proton transport;GO:0055085//transmembrane transport
SK1G00065868	40.54	86.5433	1.09408	1.17097e-14	3.76702e-13	MORF9	-	-	-	XP_015650748.1 multiple organellar RNA editing factor 9, chloroplastic [Oryza sativa Japonica Group]	-	-	-	-
SK1G00047764	15.09	32.5357	1.10843	1.17828e-14	3.77924e-13	dennd5b	-	-	-	EEC74509.1 hypothetical protein OsI_09993 [Oryza sativa Indica Group]	-	-	GO:0004049//anthranilate synthase activity	GO:0000162//tryptophan biosynthetic process
SK1G00071273	47.267	23.3083	-1.01999	1.17868e-14	3.77924e-13	--	-	-	-	XP_015612983.1 remorin [Oryza sativa Japonica Group]	-	GO:0005886//plasma membrane	GO:0003674//molecular_function	GO:0008150//biological_process
SK1G00057404	6.485	17.921	1.46647	1.19812e-14	3.8373e-13	AFR	-	-	-	KAB8103369.1 hypothetical protein EE612_035765 [Oryza sativa]	-	-	GO:0005515//protein binding	-
SK1G00047208	9.468	23.2333	1.29506	1.28066e-14	4.07011e-13	--	-	-	-	KAF2938055.1 hypothetical protein DAI22_03g092800 [Oryza sativa Japonica Group]	-	-	-	-
SK1G00058774	54.376	17.8377	-1.60804	1.29191e-14	4.10134e-13	BURP2	-	-	-	EAY96989.1 hypothetical protein OsI_18912 [Oryza sativa Indica Group]	-	-	-	-
SK1G00046413	1225.89	497.404	-1.30134	1.29846e-14	4.11762e-13	ERD15	-	-	-	EAY90021.1 hypothetical protein OsI_11591 [Oryza sativa Indica Group]	-	-	-	-
MSTRG.1192	3.847	8.54	1.1505	1.31826e-14	4.16672e-13	--	-	-	-	Os01g0728900, partial [Oryza sativa Japonica Group]	-	-	-	-
SK1G00046520	40.458	18.1837	-1.15378	1.42772e-14	4.50285e-13	EDR4	-	-	-	EEC75199.1 hypothetical protein OsI_11447 [Oryza sativa Indica Group]	-	-	-	-
SK1G00070195	1.903	11.989	2.65536	1.47301e-14	4.63052e-13	PAP1	-	-	-	TVU49571.1 hypothetical protein EJB05_00884 [Eragrostis curvula]	-	-	GO:0003993//acid phosphatase activity;GO:0016787//hydrolase activity;GO:0016788//hydrolase activity, acting on ester bonds;GO:0046872//metal ion binding	-
SK1G00046812	6.097	12.2687	1.00881	1.49907e-14	4.68697e-13	At3g09030	-	-	-	EAY89354.1 hypothetical protein OsI_10858 [Oryza sativa Indica Group]	-	-	-	GO:0051260//protein homooligomerization
SK1G00049424	7.575	3.028	-1.32288	1.50769e-14	4.70885e-13	PP2AB1	Genetic Information Processing	Translation	K04354	XP_015625600.1 serine/threonine protein phosphatase 2A 55 kDa regulatory subunit B beta isoform isoform X1 [Oryza sativa Japonica Group]	ko03015//mRNA surveillance pathway	-	GO:0005515//protein binding	-
SK1G00060472	10.071	28.2773	1.48944	1.51361e-14	4.72223e-13	IQD1	-	-	-	XP_015640404.1 protein IQ-DOMAIN 1 [Oryza sativa Japonica Group]	-	-	GO:0005515//protein binding	-
SK1G00048338	59.994	11.6993	-2.35839	1.53955e-14	4.798e-13	GAE1	Metabolism;Metabolism	Global and overview maps;Carbohydrate metabolism	K08679;K08679	XP_015623004.1 UDP-glucuronate 4-epimerase 1 [Oryza sativa Japonica Group]	ko01100//Metabolic pathways;ko00520//Amino sugar and nucleotide sugar metabolism	-	GO:0003824//catalytic activity;GO:0003854//3-beta-hydroxy-delta5-steroid dehydrogenase activity;GO:0003978//UDP-glucose 4-epimerase activity;GO:0008446//GDP-mannose 4,6-dehydratase activity;GO:0008460//dTDP-glucose 4,6-dehydratase activity;GO:0008712//ADP-glyceromanno-heptose 6-epimerase activity;GO:0008831//dTDP-4-dehydrorhamnose reductase activity;GO:0016616//oxidoreductase activity, acting on …	GO:0000271//polysaccharide biosynthetic process;GO:0005975//carbohydrate metabolic process;GO:0006012//galactose metabolic process;GO:0006694//steroid biosynthetic process;GO:0009243//O antigen biosynthetic process;GO:0009244//lipopolysaccharide core region biosynthetic process;GO:0019305//dTDP-rhamnose biosynthetic process;GO:0055114//oxidation-reduction process
SK1G00068968	11.105	22.415	1.01326	1.57668e-14	4.90312e-13	FUT13	Metabolism;Metabolism	Global and overview maps;Glycan biosynthesis and metabolism	K14412;K14412	EEC68931.1 hypothetical protein OsI_37626 [Oryza sativa Indica Group]	ko01100//Metabolic pathways;ko00513//Various types of N-glycan biosynthesis	GO:0016020//membrane;GO:0016021//integral component of membrane	GO:0005249//voltage-gated potassium channel activity;GO:0008417//fucosyltransferase activity;GO:0030955//potassium ion binding	GO:0006486//protein glycosylation;GO:0006813//potassium ion transport
SK1G00058240	49.602	109.293	1.13974	1.61685e-14	5.02267e-13	--	-	-	-	-	-	-	-	-
SK1G00047892	1.489	0.733	-1.02246	1.63366e-14	5.06943e-13	--	-	-	-	XP_015627931.1 myosin-11 isoform X2 [Oryza sativa Japonica Group]	-	-	GO:0005515//protein binding;GO:0005524//ATP binding	GO:0007059//chromosome segregation;GO:0030261//chromosome condensation
SK1G00040999	13.407	27.2453	1.02302	1.64117e-14	5.08728e-13	SWEET2B	-	-	-	XP_015619426.1 bidirectional sugar transporter SWEET2b [Oryza sativa Japonica Group]	-	GO:0016021//integral component of membrane	-	-
SK1G00043265	51.406	16.0377	-1.68047	1.65452e-14	5.12317e-13	Serinc4	-	-	-	EEC70050.1 hypothetical protein OsI_00646 [Oryza sativa Indica Group]	-	GO:0016020//membrane	-	-
SK1G00057274	189.9	89.683	-1.08233	1.66879e-14	5.15685e-13	FBA5	Metabolism;Metabolism;Metabolism;Metabolism;Metabolism;Metabolism;Metabolism;Metabolism	Global and overview maps;Global and overview maps;Global and overview maps;Global and overview maps;Carbohydrate metabolism;Energy metabolism;Carbohydrate metabolism;Carbohydrate metabolism	K01623;K01623;K01623;K01623;K01623;K01623;K01623;K01623	EEE65995.1 hypothetical protein OsJ_21934 [Oryza sativa Japonica Group]	ko01100//Metabolic pathways;ko01110//Biosynthesis of secondary metabolites;ko01200//Carbon metabolism;ko01230//Biosynthesis of amino acids;ko00010//Glycolysis / Gluconeogenesis;ko00710//Carbon fixation in photosynthetic organisms;ko00051//Fructose and mannose metabolism;ko00030//Pentose phosphate pathway	-	GO:0004332//fructose-bisphosphate aldolase activity	GO:0006096//glycolytic process;GO:0016192//vesicle-mediated transport
SK1G00039496	221.994	80.8913	-1.45646	1.66897e-14	5.15685e-13	SRC2	-	-	-	XP_015642536.1 protein SRC2 [Oryza sativa Japonica Group]	-	-	-	-
SK1G00049476	10.265	26.4177	1.36377	1.68876e-14	5.21244e-13	--	-	-	-	EEC73593.1 hypothetical protein OsI_08059 [Oryza sativa Indica Group]	-	-	-	-
SK1G00066256	1.076	3.06467	1.51005	1.71012e-14	5.26712e-13	At3g47570	-	-	-	AAX95020.1 Leucine Rich Repeat, putative [Oryza sativa Japonica Group]	-	-	GO:0000287//magnesium ion binding;GO:0003674//molecular_function;GO:0004413//homoserine kinase activity;GO:0004672//protein kinase activity;GO:0005515//protein binding;GO:0005524//ATP binding;GO:0050532//2-phosphosulfolactate phosphatase activity	GO:0006468//protein phosphorylation;GO:0009088//threonine biosynthetic process;GO:0009306//protein secretion
SK1G00040740	2.382	0.788	-1.59591	1.77731e-14	5.45664e-13	--	-	-	-	XP_015646470.1 uncharacterized protein LOC4327205 [Oryza sativa Japonica Group]	-	-	-	-
MSTRG.3306	1.819	4.03933	1.15097	1.80037e-14	5.51574e-13	--	-	-	-	Os01g0138050 [Oryza sativa Japonica Group]	-	-	-	-
SK1G00054262	2.468	10.3117	2.06286	1.87931e-14	5.73329e-13	AATL1	-	-	-	EEC77802.1 hypothetical protein OsI_16982 [Oryza sativa Indica Group]	-	-	-	-
SK1G00053236	8.238	16.574	1.00856	1.89685e-14	5.7807e-13	Os04g0179200	-	-	-	XP_015634215.1 momilactone A synthase-like [Oryza sativa Japonica Group]	-	-	GO:0003824//catalytic activity;GO:0003854//3-beta-hydroxy-delta5-steroid dehydrogenase activity;GO:0003978//UDP-glucose 4-epimerase activity;GO:0004316//3-oxoacyl-[acyl-carrier-protein] reductase (NADPH) activity;GO:0004757//sepiapterin reductase activity;GO:0008460//dTDP-glucose 4,6-dehydratase activity;GO:0008667//2,3-dihydro-2,3-dihydroxybenzoate dehydrogenase activity;GO:0008678//2-deoxy-D-gl…	GO:0000272//polysaccharide catabolic process;GO:0006012//galactose metabolic process;GO:0006631//fatty acid metabolic process;GO:0006633//fatty acid biosynthetic process;GO:0006694//steroid biosynthetic process;GO:0006729//tetrahydrobiopterin biosynthetic process;GO:0008152//metabolic process;GO:0009243//O antigen biosynthetic process;GO:0015995//chlorophyll biosynthetic process;GO:0019305//dTDP-…
SK1G00053903	23.316	10.4907	-1.15221	1.93597e-14	5.88131e-13	--	-	-	-	BAS89965.1 Os04g0504700, partial [Oryza sativa Japonica Group]	-	-	-	-
SK1G00046292	0.163	1.35033	3.05037	1.94758e-14	5.90437e-13	RBL19	-	-	-	EEC75291.1 hypothetical protein OsI_11637 [Oryza sativa Indica Group]	-	GO:0000109//nucleotide-excision repair complex;GO:0016021//integral component of membrane	GO:0004252//serine-type endopeptidase activity	GO:0000715//nucleotide-excision repair, DNA damage recognition;GO:0006289//nucleotide-excision repair;GO:0006890//retrograde vesicle-mediated transport, Golgi to ER
SK1G00071099	1.462	0.405667	-1.84958	1.94968e-14	5.90437e-13	--	-	-	-	XP_025876800.1 uncharacterized protein LOC4349119 [Oryza sativa Japonica Group]	-	GO:0016020//membrane	GO:0016757//transferase activity, transferring glycosyl groups	-
SK1G00057136	1.472	3.05533	1.05355	1.98898e-14	6.01709e-13	CYP734A4	Metabolism	Metabolism of terpenoids and polyketides	K15639	XP_015641577.1 cytochrome P450 734A4 [Oryza sativa Japonica Group]	ko00905//Brassinosteroid biosynthesis	-	GO:0005506//iron ion binding;GO:0016705//oxidoreductase activity, acting on paired donors, with incorporation or reduction of molecular oxygen;GO:0020037//heme binding	GO:0055114//oxidation-reduction process
SK1G00053250	3.087	7.21967	1.22573	2.08724e-14	6.30116e-13	GA2OX8	-	-	-	CAH66494.1 H0321H01.3 [Oryza sativa]	-	-	GO:0016491//oxidoreductase activity	GO:0055114//oxidation-reduction process
SK1G00044231	0.883	0.284333	-1.63483	2.10705e-14	6.34111e-13	--	-	-	-	EAY92409.1 hypothetical protein OsI_14144 [Oryza sativa Indica Group]	-	GO:0005576//extracellular region	GO:0005179//hormone activity	-
SK1G00050043	0.84	3.36667	2.00286	2.17206e-14	6.50019e-13	NUDT12	-	-	-	EAY86065.1 hypothetical protein OsI_07433 [Oryza sativa Indica Group]	-	-	GO:0016787//hydrolase activity;GO:0017111//nucleoside-triphosphatase activity	GO:0006139//nucleobase-containing compound metabolic process
SK1G00071331	1.472	0.356333	-2.04648	2.23657e-14	6.66844e-13	CKX3	Metabolism	Metabolism of terpenoids and polyketides	K00279	EAY82296.1 hypothetical protein OsI_37507 [Oryza sativa Indica Group]	ko00908//Zeatin biosynthesis	-	GO:0008891//glycolate oxidase activity;GO:0016491//oxidoreductase activity;GO:0019139//cytokinin dehydrogenase activity;GO:0050660//flavin adenine dinucleotide binding	GO:0005975//carbohydrate metabolic process;GO:0009690//cytokinin metabolic process;GO:0055114//oxidation-reduction process
SK1G00051495	4.051	9.63333	1.24976	2.36467e-14	6.99986e-13	MOCS2	Metabolism;Metabolism;Genetic Information Processing	Global and overview maps;Metabolism of cofactors and vitamins;Folding, sorting and degradation	K03635;K03635;K03635	A2X0R4.1 RecName: Full=Molybdopterin synthase catalytic subunit; AltName: Full=Molybdenum cofactor synthesis protein 2 large subunit; AltName: Full=Molybdenum cofactor synthesis protein 2B; Short=MOCS2B [Oryza sativa Indica Group]	ko01100//Metabolic pathways;ko00790//Folate biosynthesis;ko04122//Sulfur relay system	-	-	GO:0006777//Mo-molybdopterin cofactor biosynthetic process
SK1G00042709	0.096	1.82167	4.24608	2.42533e-14	7.15746e-13	EIF6-2	Genetic Information Processing	Translation	K03264	XP_015635348.1 eukaryotic translation initiation factor 6-2 isoform X2 [Oryza sativa Japonica Group]	ko03008//Ribosome biogenesis in eukaryotes	-	GO:0043022//ribosome binding	GO:0042256//mature ribosome assembly
SK1G00062047	2.134	0.479667	-2.15346	2.54077e-14	7.4723e-13	SPL13	-	-	-	EAZ39937.1 hypothetical protein OsJ_24374 [Oryza sativa Japonica Group]	-	-	GO:0003677//DNA binding	-
SK1G00054310	3.032	9.506	1.64857	2.67912e-14	7.83635e-13	FLZ1	-	-	-	XP_015634096.1 uncharacterized protein LOC4336795 [Oryza sativa Japonica Group]	-	-	-	-
SK1G00070262	3.737	8.03833	1.10502	2.67977e-14	7.83635e-13	RGA5	-	-	-	XP_015620262.1 disease resistance protein RGA5-like [Oryza sativa Japonica Group]	-	GO:0005737//cytoplasm;GO:0009379//Holliday junction helicase complex	GO:0000155//phosphorelay sensor kinase activity;GO:0003677//DNA binding;GO:0004673//protein histidine kinase activity;GO:0005515//protein binding;GO:0005524//ATP binding;GO:0009378//four-way junction helicase activity;GO:0016887//ATPase activity;GO:0017111//nucleoside-triphosphatase activity;GO:0043531//ADP binding	GO:0000160//phosphorelay signal transduction system;GO:0006281//DNA repair;GO:0006310//DNA recombination;GO:0006935//chemotaxis
SK1G00058532	18.852	65.8487	1.80444	2.84189e-14	8.28531e-13	--	-	-	-	XP_015639316.1 uncharacterized protein LOC4337946 [Oryza sativa Japonica Group]	-	-	GO:0018577//catechol 2,3-dioxygenase activity	GO:0009712//catechol-containing compound metabolic process
SK1G00074078	17.736	8.861	-1.00114	2.90527e-14	8.46156e-13	TRAB1	Environmental Information Processing	Signal transduction	K14432	XP_015612550.1 bZIP transcription factor TRAB1-like [Oryza sativa Japonica Group]	ko04075//Plant hormone signal transduction	-	GO:0003677//DNA binding;GO:0003700//transcription factor activity, sequence-specific DNA binding	GO:0006355//regulation of transcription, DNA-templated
SK1G00060760	8.991	18.024	1.00337	2.91682e-14	8.48665e-13	SCPL50	-	-	-	EAY99194.1 hypothetical protein OsI_21150 [Oryza sativa Indica Group]	-	-	GO:0004185//serine-type carboxypeptidase activity	GO:0006508//proteolysis
SK1G00049738	4.169	22.3023	2.41942	3.13712e-14	9.06379e-13	MST1	-	-	-	XP_015626485.1 sugar transport protein MST1-like [Oryza sativa Japonica Group]	-	GO:0005887//integral component of plasma membrane;GO:0016021//integral component of membrane	GO:0008028//monocarboxylic acid transmembrane transporter activity;GO:0015114//phosphate ion transmembrane transporter activity;GO:0015238//drug transmembrane transporter activity;GO:0015295//solute:proton symporter activity;GO:0015307//drug:proton antiporter activity;GO:0022857//transmembrane transporter activity;GO:0042910//xenobiotic transporter activity;GO:0051119//sugar transmembrane transpo…	GO:0006810//transport;GO:0006817//phosphate ion transport;GO:0006855//drug transmembrane transport;GO:0008643//carbohydrate transport;GO:0015718//monocarboxylic acid transport;GO:0015893//drug transport;GO:0042493//response to drug;GO:0042908//xenobiotic transport;GO:0055085//transmembrane transport
SK1G00043874	4.008	14.7403	1.87881	3.17331e-14	9.15064e-13	At3g02910	-	-	-	XP_015633008.1 putative gamma-glutamylcyclotransferase At3g02910 [Oryza sativa Japonica Group]	-	-	-	-
SK1G00056310	1.132	6.54667	2.53189	3.21859e-14	9.2714e-13	--	-	-	-	BAS97753.1 Os06g0472950, partial [Oryza sativa Japonica Group]	-	-	-	-
SK1G00041137	10.12	22.5783	1.15773	3.31884e-14	9.55067e-13	--	-	-	-	EAY75362.1 hypothetical protein OsI_03258 [Oryza sativa Indica Group]	-	-	-	-
SK1G00056060	2.721	0.654	-2.05677	3.47474e-14	9.96955e-13	MYB20	-	-	-	EAZ00411.1 hypothetical protein OsI_22425 [Oryza sativa Indica Group]	-	-	-	-
SK1G00074227	0.052	0.617667	3.57024	3.47964e-14	9.97369e-13	WAK1	-	-	-	XP_015610738.1 putative wall-associated receptor kinase-like 16 [Oryza sativa Japonica Group]	-	-	GO:0004672//protein kinase activity;GO:0005509//calcium ion binding;GO:0005524//ATP binding;GO:0030247//polysaccharide binding	GO:0006468//protein phosphorylation
SK1G00055222	59.213	129.219	1.12584	3.55412e-14	1.01662e-12	OsI_21475	-	-	-	XP_015643652.1 SPX domain-containing membrane protein Os06g0129400 [Oryza sativa Japonica Group]	-	GO:0000775//chromosome, centromeric region;GO:0005887//integral component of plasma membrane;GO:0016021//integral component of membrane	GO:0003677//DNA binding;GO:0003682//chromatin binding;GO:0022857//transmembrane transporter activity;GO:0051119//sugar transmembrane transporter activity	GO:0008643//carbohydrate transport;GO:0055085//transmembrane transport
SK1G00069171	57.535	149.638	1.37896	3.66623e-14	1.04464e-12	At5g49770	-	-	-	XP_015619793.1 probable leucine-rich repeat receptor-like protein kinase At5g49770 [Oryza sativa Japonica Group]	-	-	GO:0004672//protein kinase activity;GO:0005515//protein binding;GO:0005524//ATP binding	GO:0006468//protein phosphorylation
SK1G00061246	32.435	14.4913	-1.16236	3.6777e-14	1.04688e-12	At3g47520	Metabolism;Metabolism;Metabolism;Metabolism;Metabolism;Metabolism;Metabolism;Metabolism	Global and overview maps;Global and overview maps;Global and overview maps;Amino acid metabolism;Carbohydrate metabolism;Energy metabolism;Carbohydrate metabolism;Carbohydrate metabolism	K00026;K00026;K00026;K00026;K00026;K00026;K00026;K00026	XP_015645072.1 malate dehydrogenase, chloroplastic [Oryza sativa Japonica Group]	ko01100//Metabolic pathways;ko01110//Biosynthesis of secondary metabolites;ko01200//Carbon metabolism;ko00270//Cysteine and methionine metabolism;ko00620//Pyruvate metabolism;ko00710//Carbon fixation in photosynthetic organisms;ko00630//Glyoxylate and dicarboxylate metabolism;ko00020//Citrate cycle (TCA cycle)	GO:0005737//cytoplasm	GO:0004459//L-lactate dehydrogenase activity;GO:0016491//oxidoreductase activity;GO:0016616//oxidoreductase activity, acting on the CH-OH group of donors, NAD or NADP as acceptor;GO:0016620//oxidoreductase activity, acting on the aldehyde or oxo group of donors, NAD or NADP as acceptor;GO:0030060//L-malate dehydrogenase activity;GO:0051287//NAD binding	GO:0006099//tricarboxylic acid cycle;GO:0055114//oxidation-reduction process
SK1G00063040	0.279	1.137	2.0269	3.68526e-14	1.048e-12	--	-	-	-	EAZ03123.1 hypothetical protein OsI_25268 [Oryza sativa Indica Group]	-	-	GO:0005515//protein binding	-
SK1G00070406	1.558	0.603	-1.36947	3.74105e-14	1.06282e-12	NET1B	-	-	-	XP_015619951.1 protein NETWORKED 1A [Oryza sativa Japonica Group]	-	-	GO:0003779//actin binding;GO:0005524//ATP binding	GO:0007059//chromosome segregation;GO:0030261//chromosome condensation
SK1G00042482	18.261	58.3057	1.67487	3.92355e-14	1.11357e-12	PER1	Metabolism;Metabolism;Metabolism	Global and overview maps;Global and overview maps;Biosynthesis of other secondary metabolites	K00430;K00430;K00430	XP_015621829.1 peroxidase 1 [Oryza sativa Japonica Group]	ko01100//Metabolic pathways;ko01110//Biosynthesis of secondary metabolites;ko00940//Phenylpropanoid biosynthesis	-	GO:0004601//peroxidase activity;GO:0020037//heme binding	GO:0006979//response to oxidative stress;GO:0055114//oxidation-reduction process
SK1G00066475	0.551	3.09	2.48748	3.9897e-14	1.12792e-12	At3g47110	-	-	-	EEC68485.1 hypothetical protein OsI_36738 [Oryza sativa Indica Group]	-	-	GO:0004413//homoserine kinase activity;GO:0004672//protein kinase activity;GO:0005515//protein binding;GO:0005524//ATP binding	GO:0006468//protein phosphorylation;GO:0009088//threonine biosynthetic process
SK1G00045593	17.745	4.584	-1.95273	4.03618e-14	1.13811e-12	CYP71Z16	-	-	-	EEC75673.1 hypothetical protein OsI_12472 [Oryza sativa Indica Group]	-	-	GO:0005506//iron ion binding;GO:0016705//oxidoreductase activity, acting on paired donors, with incorporation or reduction of molecular oxygen;GO:0020037//heme binding	GO:0055114//oxidation-reduction process
SK1G00061755	22.042	9.52567	-1.21036	4.1654e-14	1.16959e-12	At3g03980	Metabolism;Metabolism;Metabolism;Metabolism;Metabolism	Global and overview maps;Global and overview maps;Global and overview maps;Lipid metabolism;Metabolism of cofactors and vitamins	K00059;K00059;K00059;K00059;K00059	EAZ04339.1 hypothetical protein OsI_26479 [Oryza sativa Indica Group]	ko01100//Metabolic pathways;ko01110//Biosynthesis of secondary metabolites;ko01212//Fatty acid metabolism;ko00061//Fatty acid biosynthesis;ko00780//Biotin metabolism	-	GO:0003824//catalytic activity;GO:0003978//UDP-glucose 4-epimerase activity;GO:0004316//3-oxoacyl-[acyl-carrier-protein] reductase (NADPH) activity;GO:0004757//sepiapterin reductase activity;GO:0008667//2,3-dihydro-2,3-dihydroxybenzoate dehydrogenase activity;GO:0008678//2-deoxy-D-gluconate 3-dehydrogenase activity;GO:0008831//dTDP-4-dehydrorhamnose reductase activity;GO:0016491//oxidoreductase a…	GO:0000272//polysaccharide catabolic process;GO:0006012//galactose metabolic process;GO:0006633//fatty acid biosynthetic process;GO:0006729//tetrahydrobiopterin biosynthetic process;GO:0009243//O antigen biosynthetic process;GO:0015995//chlorophyll biosynthetic process;GO:0019305//dTDP-rhamnose biosynthetic process;GO:0055114//oxidation-reduction process
SK1G00046645	55.689	17.1883	-1.69596	4.48538e-14	1.25335e-12	MYB2	-	-	-	EAY89765.1 hypothetical protein OsI_11306 [Oryza sativa Indica Group]	-	-	-	-
SK1G00052144	5.726	12.626	1.1408	4.79803e-14	1.33171e-12	--	-	-	-	-	-	-	-	-
SK1G00060757	52.204	19.057	-1.45384	4.92462e-14	1.36553e-12	SPS2	Metabolism;Metabolism	Global and overview maps;Metabolism of terpenoids and polyketides	K05356;K05356	Q75HZ9.2 RecName: Full=Solanesyl-diphosphate synthase 2, chloroplastic; Short=OsSPS2; AltName: Full=All-trans-nonaprenyl-diphosphate synthase 2 (geranyl-diphosphate specific); Flags: Precursor [Oryza sativa Japonica Group]	ko01110//Biosynthesis of secondary metabolites;ko00900//Terpenoid backbone biosynthesis	GO:0005948//acetolactate synthase complex	GO:0000010//trans-hexaprenyltranstransferase activity;GO:0003984//acetolactate synthase activity;GO:0050347//trans-octaprenyltranstransferase activity	GO:0008299//isoprenoid biosynthetic process;GO:0009097//isoleucine biosynthetic process;GO:0009099//valine biosynthetic process;GO:0009234//menaquinone biosynthetic process;GO:0010236//plastoquinone biosynthetic process
SK1G00063881	9.54	3.418	-1.48084	5.37468e-14	1.48322e-12	GAE6	Metabolism;Metabolism	Global and overview maps;Carbohydrate metabolism	K08679;K08679	KAB8109270.1 hypothetical protein EE612_045489 [Oryza sativa]	ko01100//Metabolic pathways;ko00520//Amino sugar and nucleotide sugar metabolism	-	GO:0003824//catalytic activity;GO:0003854//3-beta-hydroxy-delta5-steroid dehydrogenase activity;GO:0003978//UDP-glucose 4-epimerase activity;GO:0008446//GDP-mannose 4,6-dehydratase activity;GO:0008460//dTDP-glucose 4,6-dehydratase activity;GO:0008712//ADP-glyceromanno-heptose 6-epimerase activity;GO:0008831//dTDP-4-dehydrorhamnose reductase activity;GO:0016616//oxidoreductase activity, acting on …	GO:0000271//polysaccharide biosynthetic process;GO:0005975//carbohydrate metabolic process;GO:0006012//galactose metabolic process;GO:0006694//steroid biosynthetic process;GO:0009243//O antigen biosynthetic process;GO:0009244//lipopolysaccharide core region biosynthetic process;GO:0019305//dTDP-rhamnose biosynthetic process;GO:0055114//oxidation-reduction process
SK1G00046457	23.19	53.5063	1.20621	5.39602e-14	1.48769e-12	dnaJ2	-	-	-	XP_015632420.1 chaperone protein dnaJ 20, chloroplastic [Oryza sativa Japonica Group]	-	-	GO:0005515//protein binding	GO:0006457//protein folding;GO:0009408//response to heat
SK1G00070687	23.261	66.9317	1.52478	5.75925e-14	1.5803e-12	NPF2.11	-	-	-	OVA00322.1 Proton-dependent oligopeptide transporter family [Macleaya cordata]	-	GO:0016020//membrane	GO:0015333//peptide:proton symporter activity;GO:0022857//transmembrane transporter activity	GO:0015833//peptide transport;GO:0055085//transmembrane transport
SK1G00051849	2.82	0.487333	-2.53271	5.77871e-14	1.58413e-12	RUP1	Genetic Information Processing;Organismal Systems	Folding, sorting and degradation;Environmental adaptation	K10143;K10143	EAY84193.1 hypothetical protein OsI_05571 [Oryza sativa Indica Group]	ko04120//Ubiquitin mediated proteolysis;ko04712//Circadian rhythm - plant	-	GO:0005515//protein binding	-
SK1G00073965	160.466	58.4257	-1.45759	5.94109e-14	1.62557e-12	CYP92C6	Metabolism;Metabolism;Metabolism	Global and overview maps;Global and overview maps;Metabolism of terpenoids and polyketides	K20623;K20623;K20623	EAZ09260.1 hypothetical protein OsI_31533 [Oryza sativa Indica Group]	ko01100//Metabolic pathways;ko01110//Biosynthesis of secondary metabolites;ko00905//Brassinosteroid biosynthesis	-	GO:0005506//iron ion binding;GO:0016705//oxidoreductase activity, acting on paired donors, with incorporation or reduction of molecular oxygen;GO:0020037//heme binding	GO:0055114//oxidation-reduction process
SK1G00046075	2.161	5.397	1.32046	5.97386e-14	1.63299e-12	RKL1	-	-	-	EEC75376.1 hypothetical protein OsI_11839 [Oryza sativa Indica Group]	-	GO:0005634//nucleus	GO:0003674//molecular_function;GO:0003677//DNA binding;GO:0004672//protein kinase activity;GO:0005524//ATP binding;GO:0016709//oxidoreductase activity, acting on paired donors, with incorporation or reduction of molecular oxygen, NAD(P)H as one donor, and incorporation of one atom of oxygen	GO:0006260//DNA replication;GO:0006468//protein phosphorylation;GO:0006744//ubiquinone biosynthetic process;GO:0009306//protein secretion
SK1G00069788	7.297	20.5617	1.49458	6.03043e-14	1.64534e-12	--	-	-	-	XP_015620795.1 uncharacterized membrane protein YMR155W [Oryza sativa Japonica Group]	-	-	GO:0022857//transmembrane transporter activity	GO:0055085//transmembrane transport
SK1G00065755	12.947	5.40933	-1.2591	6.17732e-14	1.68224e-12	CYP89A9	Metabolism;Metabolism	Global and overview maps;Amino acid metabolism	K07408;K07408	EAZ05607.1 hypothetical protein OsI_27825 [Oryza sativa Indica Group]	ko01100//Metabolic pathways;ko00380//Tryptophan metabolism	-	GO:0005506//iron ion binding;GO:0016705//oxidoreductase activity, acting on paired donors, with incorporation or reduction of molecular oxygen;GO:0020037//heme binding	GO:0055114//oxidation-reduction process
SK1G00049678	1.005	3.401	1.75876	6.3543e-14	1.72395e-12	--	-	-	-	XP_015623993.1 heavy metal-associated isoprenylated plant protein 41 [Oryza sativa Japonica Group]	-	-	GO:0046872//metal ion binding	-
SK1G00061327	34.339	72.099	1.07013	6.57587e-14	1.77905e-12	TIM17-2	-	-	-	XP_015646931.1 mitochondrial import inner membrane translocase subunit TIM17-2 [Oryza sativa Japonica Group]	-	-	-	-
SK1G00068653	8.345	3.354	-1.31503	6.73003e-14	1.81701e-12	At1g67720	-	-	-	XP_015619671.1 probable LRR receptor-like serine/threonine-protein kinase At1g67720 [Oryza sativa Japonica Group]	-	-	GO:0004672//protein kinase activity;GO:0005515//protein binding;GO:0005524//ATP binding	GO:0006468//protein phosphorylation
SK1G00046633	1.772	0.689333	-1.3621	7.23943e-14	1.94403e-12	PAPS3	Genetic Information Processing	Translation	K14376	KAB8091527.1 hypothetical protein EE612_017032 [Oryza sativa]	ko03015//mRNA surveillance pathway	-	GO:0003723//RNA binding;GO:0004652//polynucleotide adenylyltransferase activity;GO:0016779//nucleotidyltransferase activity	GO:0043631//RNA polyadenylation
SK1G00040229	29.384	8.434	-1.80074	7.32413e-14	1.96313e-12	--	-	-	-	XP_015637940.1 uncharacterized protein LOC4327573 [Oryza sativa Japonica Group]	-	GO:0005634//nucleus	GO:0003677//DNA binding;GO:0008270//zinc ion binding	GO:0045893//positive regulation of transcription, DNA-templated
SK1G00064207	1.168	2.58133	1.14408	7.35075e-14	1.96844e-12	--	-	-	-	XP_015651031.1 uncharacterized protein LOC9267781 isoform X5 [Oryza sativa Japonica Group]	-	-	-	-
SK1G00045366	16.85	35.0797	1.05789	7.74445e-14	2.07003e-12	PROT1	-	-	-	XP_015630391.1 proline transporter 1 isoform X2 [Oryza sativa Japonica Group]	-	-	-	-
SK1G00040038	31.73	94.1213	1.56867	8.71998e-14	2.31306e-12	--	-	-	-	XP_015616097.1 uncharacterized protein LOC4324817 [Oryza sativa Japonica Group]	-	-	GO:0019904//protein domain specific binding	GO:0042981//regulation of apoptotic process
SK1G00060048	27.078	12.082	-1.16426	8.84729e-14	2.34101e-12	WRKY24	Organismal Systems;Environmental Information Processing	Environmental adaptation;Signal transduction	K13424;K13424	XP_015637836.1 WRKY transcription factor WRKY24 [Oryza sativa Japonica Group]	ko04626//Plant-pathogen interaction;ko04016//MAPK signaling pathway - plant	-	GO:0003700//transcription factor activity, sequence-specific DNA binding;GO:0043565//sequence-specific DNA binding	GO:0006355//regulation of transcription, DNA-templated
SK1G00048346	30.489	10.3857	-1.5537	9.02521e-14	2.38373e-12	CYPRO4	-	-	-	EAY87811.1 hypothetical protein OsI_09230 [Oryza sativa Indica Group]	-	-	GO:0005515//protein binding	-
SK1G00053917	12.5	5.21467	-1.26128	9.16302e-14	2.41351e-12	--	-	-	-	XP_015636676.1 protein LOW PSII ACCUMULATION 1, chloroplastic isoform X1 [Oryza sativa Japonica Group]	-	-	-	-
SK1G00066038	34.64	13.8533	-1.32221	9.2898e-14	2.44468e-12	ZCYB	-	-	-	XP_015650611.1 ascorbate-specific transmembrane electron transporter 1 [Oryza sativa Japonica Group]	-	-	-	-
SK1G00075026	43.844	15.115	-1.5364	9.7024e-14	2.53939e-12	--	-	-	-	XP_015644189.1 lysM and putative peptidoglycan-binding domain-containing protein 1 [Oryza sativa Japonica Group]	-	-	GO:0008649//rRNA methyltransferase activity	GO:0070475//rRNA base methylation
SK1G00045679	0.773	6.865	3.15072	1.02019e-13	2.6581e-12	At5g55050	-	-	-	XP_015628399.1 GDSL esterase/lipase At5g55050 [Oryza sativa Japonica Group]	-	-	GO:0016788//hydrolase activity, acting on ester bonds	-
SK1G00055436	4.301	9.38533	1.12574	1.04631e-13	2.7237e-12	--	-	-	-	XP_015641376.2 uncharacterized protein LOC4340243 [Oryza sativa Japonica Group]	-	-	-	-
SK1G00074238	3.408	7.065	1.05176	1.0484e-13	2.72668e-12	Os04g0590900	-	-	-	EEC84728.1 hypothetical protein OsI_31710 [Oryza sativa Indica Group]	-	GO:0000109//nucleotide-excision repair complex;GO:0005680//anaphase-promoting complex;GO:0005886//plasma membrane	GO:0008270//zinc ion binding;GO:0046872//metal ion binding;GO:0061630//ubiquitin protein ligase activity;GO:0097602//cullin family protein binding	GO:0006289//nucleotide-excision repair;GO:0006897//endocytosis;GO:0007342//fusion of sperm to egg plasma membrane;GO:0031145//anaphase-promoting complex-dependent proteasomal ubiquitin-dependent protein catabolic process;GO:0060478//acrosomal vesicle exocytosis
SK1G00050831	7.752	15.529	1.00232	1.09996e-13	2.85566e-12	UKL4	Metabolism;Metabolism	Global and overview maps;Nucleotide metabolism	K00876;K00876	XP_015625195.1 disease resistance protein RGA5-like isoform X1 [Oryza sativa Japonica Group]	ko01100//Metabolic pathways;ko00240//Pyrimidine metabolism	GO:0005737//cytoplasm;GO:0009379//Holliday junction helicase complex	GO:0003723//RNA binding;GO:0003724//RNA helicase activity;GO:0004127//cytidylate kinase activity;GO:0004140//dephospho-CoA kinase activity;GO:0004422//hypoxanthine phosphoribosyltransferase activity;GO:0004594//pantothenate kinase activity;GO:0004749//ribose phosphate diphosphokinase activity;GO:0004845//uracil phosphoribosyltransferase activity;GO:0004849//uridine kinase activity;GO:0005515//pro…	GO:0006139//nucleobase-containing compound metabolic process;GO:0006166//purine ribonucleoside salvage;GO:0006281//DNA repair;GO:0006310//DNA recombination;GO:0008655//pyrimidine-containing compound salvage;GO:0009116//nucleoside metabolic process;GO:0009152//purine ribonucleotide biosynthetic process;GO:0015937//coenzyme A biosynthetic process;GO:0015949//nucleobase-containing small molecule int…
SK1G00065494	1.687	6.10367	1.85522	1.10836e-13	2.87231e-12	CRPK1	-	-	-	EEC83067.1 hypothetical protein OsI_28179 [Oryza sativa Indica Group]	-	-	GO:0003674//molecular_function;GO:0004672//protein kinase activity;GO:0005524//ATP binding	GO:0006468//protein phosphorylation;GO:0009306//protein secretion
SK1G00061697	0.704	2.25567	1.67991	1.14704e-13	2.96193e-12	SD18	-	-	-	EEC82243.1 hypothetical protein OsI_26417 [Oryza sativa Indica Group]	-	-	GO:0004672//protein kinase activity;GO:0004674//protein serine/threonine kinase activity;GO:0005524//ATP binding	GO:0006468//protein phosphorylation;GO:0048544//recognition of pollen
SK1G00073174	33.072	112.916	1.77157	1.24202e-13	3.19292e-12	RAP2-2	-	-	-	ACA42753.1 submergence-1B [Oryza sativa f. spontanea]	-	GO:0016020//membrane	GO:0000287//magnesium ion binding;GO:0003700//transcription factor activity, sequence-specific DNA binding;GO:0005524//ATP binding;GO:0008900//hydrogen:potassium-exchanging ATPase activity	GO:0006355//regulation of transcription, DNA-templated;GO:1902600//hydrogen ion transmembrane transport
SK1G00048916	36.432	17.908	-1.0246	1.31148e-13	3.36253e-12	oleB	-	-	-	XP_015623490.1 pheophytinase, chloroplastic isoform X2 [Oryza sativa Japonica Group]	-	-	GO:0003674//molecular_function;GO:0003824//catalytic activity;GO:0004414//homoserine O-acetyltransferase activity;GO:0008236//serine-type peptidase activity;GO:0016787//hydrolase activity;GO:0047570//3-oxoadipate enol-lactonase activity;GO:0070205//2-succinyl-6-hydroxy-2,4-cyclohexadiene-1-carboxylate synthase activity	GO:0006508//proteolysis;GO:0009086//methionine biosynthetic process;GO:0009102//biotin biosynthetic process;GO:0009234//menaquinone biosynthetic process;GO:0015979//photosynthesis;GO:0030163//protein catabolic process;GO:0042952//beta-ketoadipate pathway
SK1G00041528	12.206	28.9657	1.24675	1.33421e-13	3.40834e-12	yipf1	-	-	-	XP_015633212.1 protein YIPF1 homolog [Oryza sativa Japonica Group]	-	GO:0005789//endoplasmic reticulum membrane;GO:0016020//membrane	-	GO:0006888//ER to Golgi vesicle-mediated transport
MSTRG.14964	9.192	22.6793	1.30293	1.35421e-13	3.45068e-12	--	-	-	-	Os04g0543950 [Oryza sativa Japonica Group]	-	-	-	-
SK1G00042967	18.7	44.0737	1.23688	1.36514e-13	3.47546e-12	HSL1	-	-	-	EAY73225.1 hypothetical protein OsI_01100 [Oryza sativa Indica Group]	-	-	GO:0004672//protein kinase activity;GO:0005515//protein binding;GO:0005524//ATP binding	GO:0006468//protein phosphorylation
SK1G00068024	1.088	3.193	1.55323	1.38822e-13	3.5311e-12	--	-	-	-	EAY80181.1 hypothetical protein OsI_35357 [Oryza sativa Indica Group]	-	-	-	-
SK1G00071865	34.26	8.64033	-1.98737	1.39089e-13	3.53478e-12	TIFY11E	Environmental Information Processing	Signal transduction	K13464	XP_015613462.1 protein TIFY 11e [Oryza sativa Japonica Group]	ko04075//Plant hormone signal transduction	-	-	-
SK1G00039525	10.129	21.073	1.0569	1.40985e-13	3.57042e-12	HAK5	-	-	-	XP_015622303.1 potassium transporter 5 [Oryza sativa Japonica Group]	-	GO:0016020//membrane	GO:0015079//potassium ion transmembrane transporter activity	GO:0006813//potassium ion transport;GO:0071805//potassium ion transmembrane transport
SK1G00041147	11.969	5.02967	-1.25077	1.42271e-13	3.5967e-12	NAC045	-	-	-	EAY75352.1 hypothetical protein OsI_03248 [Oryza sativa Indica Group]	-	-	GO:0003677//DNA binding	GO:0006355//regulation of transcription, DNA-templated
SK1G00054911	19.509	45.2207	1.21284	1.47001e-13	3.70656e-12	STT3B	Metabolism;Genetic Information Processing;Metabolism;Metabolism	Global and overview maps;Folding, sorting and degradation;Glycan biosynthesis and metabolism;Glycan biosynthesis and metabolism	K07151;K07151;K07151;K07151	XP_015635991.1 dolichyl-diphosphooligosaccharide--protein glycosyltransferase subunit STT3B [Oryza sativa Japonica Group]	ko01100//Metabolic pathways;ko04141//Protein processing in endoplasmic reticulum;ko00510//N-Glycan biosynthesis;ko00513//Various types of N-glycan biosynthesis	GO:0016020//membrane	GO:0004576//oligosaccharyl transferase activity	GO:0006486//protein glycosylation;GO:0006487//protein N-linked glycosylation
SK1G00047664	4.975	2.15867	-1.20456	1.49062e-13	3.75197e-12	PIX13	-	-	-	XP_015629750.1 probable serine/threonine-protein kinase PIX13 [Oryza sativa Japonica Group]	-	-	GO:0004672//protein kinase activity;GO:0005524//ATP binding	GO:0006468//protein phosphorylation
SK1G00045982	2.852	7.83467	1.4579	1.52635e-13	3.83858e-12	--	-	-	-	BAS84666.1 Os03g0411600 [Oryza sativa Japonica Group]	-	-	-	-
SK1G00049648	32.214	13.262	-1.28039	1.63794e-13	4.10138e-12	Os03g0232800	-	-	-	XP_015623382.1 lecithin-cholesterol acyltransferase-like 1 [Oryza sativa Japonica Group]	-	-	GO:0003824//catalytic activity;GO:0008236//serine-type peptidase activity;GO:0008374//O-acyltransferase activity;GO:0016787//hydrolase activity;GO:0016788//hydrolase activity, acting on ester bonds;GO:0070205//2-succinyl-6-hydroxy-2,4-cyclohexadiene-1-carboxylate synthase activity	GO:0006508//proteolysis;GO:0006629//lipid metabolic process;GO:0009102//biotin biosynthetic process;GO:0009234//menaquinone biosynthetic process
SK1G00065699	10.549	2.807	-1.91001	1.6599e-13	4.15276e-12	--	-	-	-	XP_015649405.1 non-canonical poly(A) RNA polymerase PAPD7 [Oryza sativa Japonica Group]	-	-	-	-
MSTRG.23019	0.093	1.04633	3.49197	1.70415e-13	4.25978e-12	--	-	-	-	Os02g0464550, partial [Oryza sativa Japonica Group]	-	-	-	-
SK1G00065682	2.1	6.38433	1.60415	1.72786e-13	4.31159e-12	RGA5	-	-	-	XP_015650107.1 disease resistance protein PIK6-NP-like isoform X1 [Oryza sativa Japonica Group]	-	GO:0000502//proteasome complex;GO:0005887//integral component of plasma membrane;GO:0009898//cytoplasmic side of plasma membrane;GO:0016020//membrane;GO:0043190//ATP-binding cassette (ABC) transporter complex;GO:0055051//ATP-binding cassette (ABC) transporter complex, integrated substrate binding;GO:0055052//ATP-binding cassette (ABC) transporter complex, substrate-binding subunit-containing	GO:0004020//adenylylsulfate kinase activity;GO:0004222//metalloendopeptidase activity;GO:0004798//thymidylate kinase activity;GO:0005515//protein binding;GO:0005524//ATP binding;GO:0009378//four-way junction helicase activity;GO:0015412//molybdate transmembrane-transporting ATPase activity;GO:0015413//nickel-transporting ATPase activity;GO:0015414//nitrate transmembrane-transporting ATPase activi…	GO:0000910//cytokinesis;GO:0006281//DNA repair;GO:0006310//DNA recombination;GO:0006508//proteolysis;GO:0006790//sulfur compound metabolic process;GO:0006810//transport;GO:0006817//phosphate ion transport;GO:0006824//cobalt ion transport;GO:0009306//protein secretion;GO:0010498//proteasomal protein catabolic process;GO:0015675//nickel cation transport;GO:0015689//molybdate ion transport;GO:001570…
SK1G00065597	6.877	15.1667	1.14105	1.75699e-13	4.38051e-12	GTE7	-	-	-	EEC83032.1 hypothetical protein OsI_28113 [Oryza sativa Indica Group]	-	-	GO:0005515//protein binding	-
SK1G00074228	113.944	265.318	1.2194	1.80764e-13	4.49903e-12	PER17	Metabolism;Metabolism;Metabolism	Global and overview maps;Global and overview maps;Biosynthesis of other secondary metabolites	K00430;K00430;K00430	XP_015651263.1 peroxidase 17 [Oryza sativa Japonica Group]	ko01100//Metabolic pathways;ko01110//Biosynthesis of secondary metabolites;ko00940//Phenylpropanoid biosynthesis	-	GO:0004601//peroxidase activity;GO:0020037//heme binding	GO:0006979//response to oxidative stress;GO:0055114//oxidation-reduction process
SK1G00069750	4.262	11.045	1.37379	1.8127e-13	4.50775e-12	--	-	-	-	EAY74425.1 hypothetical protein OsI_02315 [Oryza sativa Indica Group]	-	-	-	-
SK1G00070160	0.148	0.522	1.81845	1.82861e-13	4.53951e-12	PCMP-H42	-	-	-	XP_015618345.1 pentatricopeptide repeat-containing protein At4g13650 [Oryza sativa Japonica Group]	-	GO:1990904//ribonucleoprotein complex	GO:0008270//zinc ion binding	GO:0000372//Group I intron splicing
SK1G00046881	79.177	32.2957	-1.29374	1.86735e-13	4.62774e-12	TRP5	-	-	-	EEC74957.1 hypothetical protein OsI_10944 [Oryza sativa Indica Group]	-	-	GO:0005515//protein binding	-
SK1G00039617	0.853	0.364333	-1.22729	1.97428e-13	4.85942e-12	MSP1	-	-	-	XP_015622427.1 leucine-rich repeat receptor protein kinase MSP1 [Oryza sativa Japonica Group]	-	-	GO:0004672//protein kinase activity;GO:0005515//protein binding;GO:0005524//ATP binding	GO:0006468//protein phosphorylation
SK1G00066846	2.58	6.817	1.40177	2.07921e-13	5.10899e-12	--	-	-	-	XP_015615083.1 uncharacterized protein LOC112935991 [Oryza sativa Japonica Group]	-	-	-	-
SK1G00046569	3.809	1.33367	-1.51401	2.0937e-13	5.13587e-12	--	-	-	-	XP_025880133.1 uncharacterized protein LOC4332590 isoform X2 [Oryza sativa Japonica Group]	-	-	GO:0005515//protein binding	GO:0006457//protein folding;GO:0009408//response to heat
SK1G00066229	2.324	4.70467	1.01748	2.098e-13	5.14207e-12	RGA4	-	-	-	ALO70070.1 NBS-LRR-like resistance protein [Oryza sativa]	-	-	GO:0005515//protein binding;GO:0043531//ADP binding	-
SK1G00045255	1.822	6.263	1.78133	2.10661e-13	5.15007e-12	WRKY71	-	-	-	XP_015629815.1 probable WRKY transcription factor 20 isoform X2 [Oryza sativa Japonica Group]	-	-	GO:0003700//transcription factor activity, sequence-specific DNA binding;GO:0043565//sequence-specific DNA binding	GO:0006355//regulation of transcription, DNA-templated
SK1G00069983	1.841	4.59567	1.31978	2.18781e-13	5.33504e-12	Os12g0515500	-	-	-	XP_015620786.1 zinc finger CCCH domain-containing protein 67 [Oryza sativa Japonica Group]	-	-	GO:0005515//protein binding;GO:0046872//metal ion binding	-
SK1G00056896	14.27	6.69333	-1.09219	2.20274e-13	5.36694e-12	--	-	-	-	KAF2927145.1 hypothetical protein DAI22_06g182903 [Oryza sativa Japonica Group]	-	-	-	-
SK1G00045713	0.477	2.51467	2.39831	2.25458e-13	5.4702e-12	--	-	-	-	-	-	GO:0005789//endoplasmic reticulum membrane	-	GO:0034599//cellular response to oxidative stress
SK1G00046639	0.49	1.954	1.99558	2.26144e-13	5.48225e-12	--	-	-	-	EAY89757.1 hypothetical protein OsI_11300 [Oryza sativa Indica Group]	-	GO:0030288//outer membrane-bounded periplasmic space	GO:0003723//RNA binding;GO:0005215//transporter activity;GO:0009982//pseudouridine synthase activity	GO:0001522//pseudouridine synthesis;GO:0006508//proteolysis;GO:0006810//transport;GO:0009405//pathogenesis;GO:0009451//RNA modification
SK1G00051414	122.087	39.996	-1.60998	2.3579e-13	5.70652e-12	CRPK1	-	-	-	XP_015626953.1 cold-responsive protein kinase 1 isoform X1 [Oryza sativa Japonica Group]	-	-	GO:0003674//molecular_function;GO:0004672//protein kinase activity;GO:0005524//ATP binding	GO:0006468//protein phosphorylation;GO:0009306//protein secretion
SK1G00074027	2.391	0.574333	-2.05765	2.42284e-13	5.84899e-12	ZHD1	-	-	-	A2Z259.1 RecName: Full=Zinc-finger homeodomain protein 1 [Oryza sativa Indica Group]	-	-	-	-
SK1G00050281	1.109	2.802	1.3372	2.73698e-13	6.52567e-12	CRK6	-	-	-	XP_015622929.1 cysteine-rich receptor-like protein kinase 6 isoform X1 [Oryza sativa Japonica Group]	-	-	GO:0003674//molecular_function;GO:0004672//protein kinase activity;GO:0005524//ATP binding	GO:0006468//protein phosphorylation;GO:0009306//protein secretion
SK1G00063383	2846.01	1260.73	-1.17468	2.75294e-13	6.54751e-12	PSBR	Metabolism	Energy metabolism	K03541	XP_015647559.1 photosystem II 10 kDa polypeptide, chloroplastic [Oryza sativa Japonica Group]	ko00195//Photosynthesis	GO:0009523//photosystem II;GO:0009654//photosystem II oxygen evolving complex;GO:0042651//thylakoid membrane	-	GO:0015979//photosynthesis
SK1G00066138	5.578	16.0703	1.52658	2.7765e-13	6.59271e-12	RIXI	Metabolism;Metabolism	Global and overview maps;Carbohydrate metabolism	K01183;K01183	EAY81872.1 hypothetical protein OsI_37037 [Oryza sativa Indica Group]	ko01100//Metabolic pathways;ko00520//Amino sugar and nucleotide sugar metabolism	-	-	GO:0005975//carbohydrate metabolic process
SK1G00047494	2.207	5.526	1.32415	2.79895e-13	6.63512e-12	DTX27	-	-	-	EEC74654.1 hypothetical protein OsI_10313 [Oryza sativa Indica Group]	-	GO:0016020//membrane	GO:0015238//drug transmembrane transporter activity;GO:0015297//antiporter activity;GO:0042910//xenobiotic transporter activity	GO:0006855//drug transmembrane transport;GO:0042493//response to drug;GO:0055085//transmembrane transport
SK1G00055681	2.647	5.98	1.17579	2.88392e-13	6.79754e-12	LECRKS4	-	-	-	XP_015642162.1 L-type lectin-domain containing receptor kinase S.4 [Oryza sativa Japonica Group]	-	-	GO:0004672//protein kinase activity;GO:0005524//ATP binding;GO:0030246//carbohydrate binding	GO:0006468//protein phosphorylation
SK1G00039624	10.143	25.757	1.34448	2.99384e-13	7.03941e-12	RBG4	-	-	-	XP_015622053.1 glycine-rich RNA-binding protein 4, mitochondrial [Oryza sativa Japonica Group]	-	-	GO:0003676//nucleic acid binding	GO:0008380//RNA splicing
SK1G00057425	9.194	2.29667	-2.00115	3.09762e-13	7.25394e-12	ADIPOR2	-	-	-	EEC81095.1 hypothetical protein OsI_23936 [Oryza sativa Indica Group]	-	GO:0016021//integral component of membrane	GO:0015267//channel activity	GO:0019835//cytolysis
SK1G00071147	70.31	147.698	1.07085	3.36857e-13	7.84399e-12	ADT3	Metabolism;Metabolism;Metabolism;Metabolism	Global and overview maps;Global and overview maps;Global and overview maps;Amino acid metabolism	K05359;K05359;K05359;K05359	EAY79257.1 hypothetical protein OsI_34374 [Oryza sativa Indica Group]	ko01100//Metabolic pathways;ko01110//Biosynthesis of secondary metabolites;ko01230//Biosynthesis of amino acids;ko00400//Phenylalanine, tyrosine and tryptophan biosynthesis	-	GO:0004664//prephenate dehydratase activity	GO:0009094//L-phenylalanine biosynthetic process
SK1G00053043	90.548	27.9437	-1.69616	3.41703e-13	7.95044e-12	CEQORH	Metabolism;Metabolism	Global and overview maps;Lipid metabolism	K00224;K00224	XP_015636266.1 chloroplast envelope quinone oxidoreductase homolog [Oryza sativa Japonica Group]	ko01110//Biosynthesis of secondary metabolites;ko00592//alpha-Linolenic acid metabolism	-	GO:0004024//alcohol dehydrogenase activity, zinc-dependent;GO:0008270//zinc ion binding;GO:0008743//L-threonine 3-dehydrogenase activity;GO:0016491//oxidoreductase activity;GO:0016655//oxidoreductase activity, acting on NAD(P)H, quinone or similar compound as acceptor;GO:0050607//mycothiol-dependent formaldehyde dehydrogenase activity;GO:0051287//NAD binding;GO:0051903//S-(hydroxymethyl)glutathio…	GO:0006113//fermentation;GO:0006567//threonine catabolic process;GO:0008152//metabolic process;GO:0009404//toxin metabolic process;GO:0010127//mycothiol-dependent detoxification;GO:0055114//oxidation-reduction process
SK1G00062610	16.557	5.77433	-1.51971	3.54181e-13	8.22752e-12	ABCG11	-	-	-	EEC81874.1 hypothetical protein OsI_25665 [Oryza sativa Indica Group]	-	GO:0005575//cellular_component;GO:0005887//integral component of plasma membrane;GO:0009380//excinuclease repair complex;GO:0009898//cytoplasmic side of plasma membrane;GO:0016020//membrane;GO:0016021//integral component of membrane;GO:0043190//ATP-binding cassette (ABC) transporter complex;GO:0055051//ATP-binding cassette (ABC) transporter complex, integrated substrate binding;GO:0055052//ATP-bi…	GO:0003674//molecular_function;GO:0003723//RNA binding;GO:0003724//RNA helicase activity;GO:0003924//GTPase activity;GO:0004020//adenylylsulfate kinase activity;GO:0005198//structural molecule activity;GO:0005260//channel-conductance-controlling ATPase activity;GO:0005319//lipid transporter activity;GO:0005524//ATP binding;GO:0005525//GTP binding;GO:0008565//protein transporter activity;GO:000938…	GO:0000910//cytokinesis;GO:0001887//selenium compound metabolic process;GO:0002949//tRNA threonylcarbamoyladenosine modification;GO:0006289//nucleotide-excision repair;GO:0006400//tRNA modification;GO:0006576//cellular biogenic amine metabolic process;GO:0006790//sulfur compound metabolic process;GO:0006810//transport;GO:0006817//phosphate ion transport;GO:0006824//cobalt ion transport;GO:0006855…
SK1G00053202	6.921	2.842	-1.28407	3.6184e-13	8.39196e-12	PI21	-	-	-	BAS89033.1 Os04g0400000 [Oryza sativa Japonica Group]	-	-	GO:0046559//alpha-glucuronidase activity	GO:0045493//xylan catabolic process
SK1G00062869	0.079	0.516667	2.70931	3.64767e-13	8.45308e-12	--	-	-	-	ABA95048.1 transposon protein, putative, Mutator sub-class [Oryza sativa Japonica Group]	-	-	-	GO:0007283//spermatogenesis
SK1G00074242	9.384	3.47233	-1.4343	3.78738e-13	8.75578e-12	ATL6	-	-	-	EAZ09435.1 hypothetical protein OsI_31707 [Oryza sativa Indica Group]	-	GO:0000109//nucleotide-excision repair complex;GO:0005680//anaphase-promoting complex;GO:0016020//membrane;GO:0016021//integral component of membrane	GO:0008270//zinc ion binding;GO:0046872//metal ion binding;GO:0061630//ubiquitin protein ligase activity;GO:0097602//cullin family protein binding	GO:0006289//nucleotide-excision repair;GO:0016567//protein ubiquitination;GO:0031145//anaphase-promoting complex-dependent proteasomal ubiquitin-dependent protein catabolic process
SK1G00047385	252.123	122.187	-1.04504	4.56151e-13	1.0437e-11	SKIP11	-	-	-	XP_015631568.1 F-box/kelch-repeat protein At1g74510 [Oryza sativa Japonica Group]	-	-	GO:0005515//protein binding	-
SK1G00041805	7.258	17.3147	1.25435	4.75774e-13	1.0833e-11	ILL1	-	-	-	Q84XG9.1 RecName: Full=IAA-amino acid hydrolase ILR1-like 1; Flags: Precursor [Oryza sativa Indica Group]	-	-	GO:0004180//carboxypeptidase activity;GO:0004222//metalloendopeptidase activity;GO:0008777//acetylornithine deacetylase activity;GO:0009014//succinyl-diaminopimelate desuccinylase activity;GO:0016787//hydrolase activity	GO:0006508//proteolysis;GO:0006592//ornithine biosynthetic process;GO:0009089//lysine biosynthetic process via diaminopimelate
SK1G00060372	58.484	20.5613	-1.50811	4.7908e-13	1.08927e-11	--	-	-	-	XP_015640556.1 uncharacterized protein LOC4339366 [Oryza sativa Japonica Group]	-	-	-	-
SK1G00073175	19.625	55.9217	1.51071	4.82079e-13	1.09351e-11	ERF073	-	-	-	ACA42755.1 submergence-1C [Oryza sativa f. spontanea]	-	-	GO:0003700//transcription factor activity, sequence-specific DNA binding	GO:0006355//regulation of transcription, DNA-templated
SK1G00074459	160.543	77.8507	-1.04418	4.82971e-13	1.09467e-11	RBL4	-	-	-	XP_015612697.1 RHOMBOID-like protein 2 [Oryza sativa Japonica Group]	-	GO:0005887//integral component of plasma membrane;GO:0016021//integral component of membrane	GO:0004252//serine-type endopeptidase activity	GO:0006464//cellular protein modification process;GO:0019538//protein metabolic process
SK1G00070543	2.762	6.35233	1.20157	4.95015e-13	1.12109e-11	WAK2	-	-	-	OEL35672.1 Wall-associated receptor kinase 2, partial [Dichanthelium oligosanthes]	-	GO:0016021//integral component of membrane	GO:0004518//nuclease activity;GO:0004672//protein kinase activity;GO:0004674//protein serine/threonine kinase activity;GO:0005509//calcium ion binding;GO:0005524//ATP binding;GO:0030247//polysaccharide binding;GO:0030745//dimethylhistidine N-methyltransferase activity	GO:0006468//protein phosphorylation;GO:0052699//ergothioneine biosynthetic process
SK1G00048554	30.416	7.75267	-1.97207	4.97308e-13	1.12452e-11	PHI-1	-	-	-	KAF3793729.1 EXORDIUM-like 4 protein [Nymphaea thermarum]	-	GO:0012506//vesicle membrane	GO:0005198//structural molecule activity	-
SK1G00073914	1.578	3.502	1.15008	5.15529e-13	1.1639e-11	BHLH66	-	-	-	EEC84577.1 hypothetical protein OsI_31377 [Oryza sativa Indica Group]	-	-	GO:0046983//protein dimerization activity	-
SK1G00044444	1.354	3.719	1.45769	5.44703e-13	1.22425e-11	--	-	-	-	XP_015628403.1 uncharacterized protein LOC4334296 [Oryza sativa Japonica Group]	-	-	-	-
SK1G00047379	15.515	7.42967	-1.06229	5.47501e-13	1.22937e-11	--	-	-	-	XP_015630816.1 uncharacterized protein LOC4331773 [Oryza sativa Japonica Group]	-	-	-	-
SK1G00063249	14.935	4.47567	-1.73852	5.48902e-13	1.23156e-11	OsI_17065	Metabolism;Metabolism;Metabolism;Metabolism;Metabolism	Global and overview maps;Global and overview maps;Global and overview maps;Lipid metabolism;Lipid metabolism	K10258;K10258;K10258;K10258;K10258	EAZ02860.1 hypothetical protein OsI_24990 [Oryza sativa Indica Group]	ko01100//Metabolic pathways;ko01110//Biosynthesis of secondary metabolites;ko01212//Fatty acid metabolism;ko00062//Fatty acid elongation;ko01040//Biosynthesis of unsaturated fatty acids	-	GO:0016627//oxidoreductase activity, acting on the CH-CH group of donors	GO:0006629//lipid metabolic process
MSTRG.17081	2.398	6.93667	1.53241	5.53396e-13	1.23972e-11	--	-	-	-	Os11g0106000 [Oryza sativa Japonica Group]	-	-	GO:0046914//transition metal ion binding	-
SK1G00072661	4.321	12.005	1.4742	5.55539e-13	1.24356e-11	Os10g0114500	-	-	-	EEC66474.1 hypothetical protein OsI_32559 [Oryza sativa Indica Group]	-	-	-	-
SK1G00065311	0.656	1.938	1.5628	5.69394e-13	1.27162e-11	PCMP-H61	-	-	-	EEE68333.1 hypothetical protein OsJ_26615 [Oryza sativa Japonica Group]	-	GO:0005575//cellular_component	GO:0001727//lipid kinase activity;GO:0004143//diacylglycerol kinase activity;GO:0005515//protein binding;GO:0008270//zinc ion binding;GO:0016301//kinase activity;GO:0042802//identical protein binding	GO:0007205//protein kinase C-activating G-protein coupled receptor signaling pathway;GO:0008150//biological_process
SK1G00064383	1.399	5.36133	1.9382	5.7441e-13	1.27986e-11	SKIP14	-	-	-	BAT05526.1 Os08g0428100, partial [Oryza sativa Japonica Group]	-	-	GO:0005515//protein binding	-
SK1G00066786	3.125	7.877	1.33379	6.02858e-13	1.33501e-11	XA21	Organismal Systems	Environmental adaptation	K13437	BAF28482.1 Os11g0569800, partial [Oryza sativa Japonica Group]	ko04626//Plant-pathogen interaction	-	GO:0004413//homoserine kinase activity;GO:0004672//protein kinase activity;GO:0005515//protein binding;GO:0005524//ATP binding	GO:0006468//protein phosphorylation;GO:0009088//threonine biosynthetic process
SK1G00044326	32.304	84.7103	1.39083	6.04011e-13	1.33654e-11	--	-	-	-	XP_015633060.1 uncharacterized protein LOC4334447 [Oryza sativa Japonica Group]	-	-	GO:0022857//transmembrane transporter activity	GO:0055085//transmembrane transport
SK1G00061968	0.938	4.595	2.29241	6.11019e-13	1.35102e-11	Os07g0271500	-	-	-	KAB8105677.1 hypothetical protein EE612_039666 [Oryza sativa]	-	GO:0016020//membrane	GO:0004315//3-oxoacyl-[acyl-carrier-protein] synthase activity;GO:0004421//hydroxymethylglutaryl-CoA synthase activity;GO:0016747//transferase activity, transferring acyl groups other than amino-acyl groups	GO:0006633//fatty acid biosynthetic process
MSTRG.18008	1.769	0.565333	-1.64576	6.14143e-13	1.35689e-11	--	-	-	-	keratin-associated protein 21-1 [Oryza sativa Japonica Group]	-	-	-	-
SK1G00050993	2.788	6.90867	1.30918	6.20858e-13	1.36858e-11	--	-	-	-	XP_025879131.1 uncharacterized protein LOC4328804 [Oryza sativa Japonica Group]	-	-	GO:0016787//hydrolase activity	-
SK1G00064748	87.007	260.326	1.58112	6.92402e-13	1.51589e-11	PEP4	Metabolism;Metabolism;Metabolism;Metabolism	Global and overview maps;Global and overview maps;Carbohydrate metabolism;Energy metabolism	K01595;K01595;K01595;K01595	XP_015650067.1 phosphoenolpyruvate carboxylase 2 [Oryza sativa Japonica Group]	ko01100//Metabolic pathways;ko01200//Carbon metabolism;ko00620//Pyruvate metabolism;ko00710//Carbon fixation in photosynthetic organisms	-	GO:0008964//phosphoenolpyruvate carboxylase activity	GO:0006099//tricarboxylic acid cycle;GO:0015977//carbon fixation
SK1G00063320	0.999	2.357	1.2384	7.25568e-13	1.58252e-11	At2g16250	-	-	-	XP_015647874.1 probable LRR receptor-like serine/threonine-protein kinase At2g16250 [Oryza sativa Japonica Group]	-	-	GO:0004672//protein kinase activity;GO:0005515//protein binding;GO:0005524//ATP binding	GO:0006468//protein phosphorylation
SK1G00039423	7.903	21.0537	1.4136	7.26892e-13	1.58421e-11	SCL3	-	-	-	XP_015610769.1 scarecrow-like protein 3 isoform X1 [Oryza sativa Japonica Group]	-	-	-	-
SK1G00047930	47.74	18.9683	-1.33161	7.31255e-13	1.59012e-11	ATP1	-	-	-	XP_015628426.1 probable pterin-4-alpha-carbinolamine dehydratase, chloroplastic [Oryza sativa Japonica Group]	-	-	GO:0008124//4-alpha-hydroxytetrahydrobiopterin dehydratase activity	GO:0006729//tetrahydrobiopterin biosynthetic process
SK1G00046857	4.933	15.696	1.66986	7.47145e-13	1.62102e-11	AHL22	-	-	-	XP_015628254.1 AT-hook motif nuclear-localized protein 29 [Oryza sativa Japonica Group]	-	-	-	-
SK1G00056599	29.553	61.7817	1.06387	7.53177e-13	1.63067e-11	XIPI	Metabolism;Metabolism	Global and overview maps;Carbohydrate metabolism	K01183;K01183	XP_015641941.2 xylanase inhibitor protein 1 isoform X1 [Oryza sativa Japonica Group]	ko01100//Metabolic pathways;ko00520//Amino sugar and nucleotide sugar metabolism	-	-	GO:0005975//carbohydrate metabolic process
SK1G00048920	66.12	32.8593	-1.00878	7.74322e-13	1.67496e-11	--	-	-	-	EEC73852.1 hypothetical protein OsI_08614 [Oryza sativa Indica Group]	-	-	-	-
MSTRG.3205	0.973	2.06333	1.08447	7.80254e-13	1.68653e-11	RPK1	-	-	-	Os01g0152600 [Oryza sativa Japonica Group]	-	GO:0031224//intrinsic component of membrane	GO:0004672//protein kinase activity;GO:0032550//purine ribonucleoside binding	GO:0006464//cellular protein modification process
SK1G00051237	2.164	4.68333	1.11384	8.0992e-13	1.74804e-11	--	-	-	-	KAF2943664.1 hypothetical protein DAI22_02g081200 [Oryza sativa Japonica Group]	-	GO:0045203//integral component of cell outer membrane	GO:0005215//transporter activity;GO:0005515//protein binding	GO:0015774//polysaccharide transport;GO:0042710//biofilm formation
SK1G00049143	2.595	0.843	-1.62213	8.16181e-13	1.76024e-11	MFSD14A	-	-	-	EAY87003.1 hypothetical protein OsI_08398 [Oryza sativa Indica Group]	-	GO:0005887//integral component of plasma membrane	GO:0015295//solute:proton symporter activity;GO:0015514//nitrite efflux transmembrane transporter activity;GO:0022857//transmembrane transporter activity;GO:0042910//xenobiotic transporter activity	GO:0006810//transport;GO:0015707//nitrite transport;GO:0042908//xenobiotic transport;GO:0055085//transmembrane transport
SK1G00049919	73.56	21.454	-1.77767	8.6019e-13	1.84963e-11	PUB27	-	-	-	EAY86195.1 hypothetical protein OsI_07571 [Oryza sativa Indica Group]	-	-	GO:0004842//ubiquitin-protein transferase activity;GO:0008270//zinc ion binding	GO:0016567//protein ubiquitination
SK1G00045896	9.22	20.7763	1.1721	8.84569e-13	1.89466e-11	--	-	-	-	EAY90535.1 hypothetical protein OsI_12137 [Oryza sativa Indica Group]	-	-	GO:0046872//metal ion binding	-
SK1G00063269	5.599	12.2387	1.12821	8.85064e-13	1.89466e-11	At5g38460	Metabolism;Metabolism	Global and overview maps;Glycan biosynthesis and metabolism	K03848;K03848	XP_015644974.1 probable dolichyl pyrophosphate Man9GlcNAc2 alpha-1,3-glucosyltransferase [Oryza sativa Japonica Group]	ko01100//Metabolic pathways;ko00510//N-Glycan biosynthesis	-	GO:0016758//transferase activity, transferring hexosyl groups	-
SK1G00043260	8.58	18.6793	1.12239	9.13804e-13	1.94978e-11	NCL1	-	-	-	KAB8080474.1 hypothetical protein EE612_001017 [Oryza sativa]	-	GO:0016021//integral component of membrane	GO:0005509//calcium ion binding;GO:0015368//calcium:cation antiporter activity	GO:0006816//calcium ion transport;GO:0055085//transmembrane transport
SK1G00049879	1.936	5.14133	1.40906	9.14182e-13	1.94978e-11	--	-	-	-	XP_015627164.1 trafficking protein particle complex subunit 12 [Oryza sativa Japonica Group]	-	-	GO:0005515//protein binding	-
SK1G00040022	14.747	54.426	1.88387	9.53177e-13	2.024e-11	--	-	-	-	XP_015622042.1 uncharacterized protein LOC4324827 [Oryza sativa Japonica Group]	-	GO:0017119//Golgi transport complex	GO:0005515//protein binding	GO:0006886//intracellular protein transport
SK1G00051234	1.33	4.155	1.64342	9.75727e-13	2.0643e-11	5GT	-	-	-	EAY84926.1 hypothetical protein OsI_06294 [Oryza sativa Indica Group]	-	-	GO:0008194//UDP-glycosyltransferase activity;GO:0016758//transferase activity, transferring hexosyl groups	-
SK1G00044849	12.786	5.43	-1.23554	9.88694e-13	2.08868e-11	LCAT1	Metabolism	Lipid metabolism	K06129	EEC76116.1 hypothetical protein OsI_13383 [Oryza sativa Indica Group]	ko00564//Glycerophospholipid metabolism	-	GO:0003824//catalytic activity;GO:0008374//O-acyltransferase activity;GO:0016788//hydrolase activity, acting on ester bonds;GO:0018738//S-formylglutathione hydrolase activity	GO:0006629//lipid metabolic process;GO:0009102//biotin biosynthetic process;GO:0046292//formaldehyde metabolic process
SK1G00064463	19.847	8.807	-1.1722	1.04237e-12	2.19407e-11	TIL	-	-	-	XP_015650151.1 temperature-induced lipocalin-1 [Oryza sativa Japonica Group]	-	-	-	-
SK1G00045350	3.126	8.415	1.42865	1.05338e-12	2.214e-11	CAT1	-	-	-	XP_015628317.1 cationic amino acid transporter 1 [Oryza sativa Japonica Group]	-	GO:0005887//integral component of plasma membrane;GO:0016020//membrane;GO:0016021//integral component of membrane	GO:0005275//amine transmembrane transporter activity;GO:0015171//amino acid transmembrane transporter activity;GO:0015495//gamma-aminobutyric acid:proton symporter activity;GO:0016811//hydrolase activity, acting on carbon-nitrogen (but not peptide) bonds, in linear amides;GO:0022857//transmembrane transporter activity	GO:0006672//ceramide metabolic process;GO:0006810//transport;GO:0006865//amino acid transport;GO:0009450//gamma-aminobutyric acid catabolic process;GO:0015837//amine transport;GO:0055085//transmembrane transport
MSTRG.13781	39.618	19.444	-1.02683	1.06629e-12	2.23789e-11	--	-	-	-	P0560B06.12 [Oryza sativa Japonica Group]	-	-	-	-
SK1G00047537	84.456	25.969	-1.70141	1.075e-12	2.2529e-11	HIPP05	-	-	-	EAY88578.1 hypothetical protein OsI_10051 [Oryza sativa Indica Group]	-	GO:0005576//extracellular region	GO:0005507//copper ion binding;GO:0008236//serine-type peptidase activity;GO:0016491//oxidoreductase activity;GO:0045340//mercury ion binding;GO:0046872//metal ion binding	GO:0006508//proteolysis;GO:0006825//copper ion transport;GO:0015694//mercury ion transport;GO:0055114//oxidation-reduction process
SK1G00055087	16.533	7.856	-1.07348	1.14164e-12	2.37706e-11	BEL1	-	-	-	XP_015641004.1 homeobox protein BEL1 homolog [Oryza sativa Japonica Group]	-	-	GO:0003677//DNA binding	GO:0006355//regulation of transcription, DNA-templated
SK1G00059619	0.632	5.394	3.09336	1.18556e-12	2.45965e-11	PBL7	-	-	-	EEC79183.1 hypothetical protein OsI_19878 [Oryza sativa Indica Group]	-	-	GO:0004672//protein kinase activity;GO:0005524//ATP binding	GO:0006468//protein phosphorylation
SK1G00062003	0.646	3.49633	2.43624	1.19633e-12	2.47489e-11	GSO1	-	-	-	EAZ03961.1 hypothetical protein OsI_26097 [Oryza sativa Indica Group]	-	-	GO:0004672//protein kinase activity;GO:0005515//protein binding;GO:0005524//ATP binding	GO:0006468//protein phosphorylation
SK1G00053224	10.984	29.3487	1.41789	1.20528e-12	2.48808e-11	BRG3	-	-	-	XP_015633677.1 probable BOI-related E3 ubiquitin-protein ligase 2 [Oryza sativa Japonica Group]	-	-	-	-
SK1G00061844	9.057	18.1373	1.00186	1.20748e-12	2.49085e-11	CRK6	-	-	-	EEC82208.1 hypothetical protein OsI_26352 [Oryza sativa Indica Group]	-	-	GO:0004672//protein kinase activity;GO:0005524//ATP binding	GO:0006468//protein phosphorylation
SK1G00060286	2.53	6.60767	1.385	1.21714e-12	2.5054e-11	At5g46170	-	-	-	XP_015637333.1 F-box protein At5g46170 [Oryza sativa Japonica Group]	-	-	GO:0005515//protein binding	-
SK1G00047424	3.535	1.009	-1.80878	1.24859e-12	2.56831e-11	--	-	-	-	OEL16445.1 hypothetical protein BAE44_0022542 [Dichanthelium oligosanthes]	-	-	GO:0003674//molecular_function;GO:0003824//catalytic activity;GO:0008236//serine-type peptidase activity;GO:0016787//hydrolase activity;GO:0016788//hydrolase activity, acting on ester bonds;GO:0047570//3-oxoadipate enol-lactonase activity;GO:0070205//2-succinyl-6-hydroxy-2,4-cyclohexadiene-1-carboxylate synthase activity	GO:0006112//energy reserve metabolic process;GO:0006508//proteolysis;GO:0006629//lipid metabolic process;GO:0008152//metabolic process;GO:0009058//biosynthetic process;GO:0009102//biotin biosynthetic process;GO:0009234//menaquinone biosynthetic process;GO:0015979//photosynthesis;GO:0042952//beta-ketoadipate pathway
SK1G00045995	56.526	24.0623	-1.23214	1.33903e-12	2.74264e-11	ACR4	-	-	-	EAY90442.1 hypothetical protein OsI_12028 [Oryza sativa Indica Group]	-	-	GO:0003824//catalytic activity;GO:0003941//L-serine ammonia-lyase activity;GO:0004617//phosphoglycerate dehydrogenase activity;GO:0004794//L-threonine ammonia-lyase activity;GO:0008773//[protein-PII] uridylyltransferase activity;GO:0008864//formyltetrahydrofolate deformylase activity	GO:0006094//gluconeogenesis;GO:0006549//isoleucine metabolic process;GO:0006564//L-serine biosynthetic process;GO:0006565//L-serine catabolic process;GO:0009152//purine ribonucleotide biosynthetic process;GO:0015968//stringent response;GO:0015969//guanosine tetraphosphate metabolic process;GO:0018177//protein uridylylation
SK1G00053417	0.804	1.636	1.02491	1.34284e-12	2.74849e-11	PCMP-A5	-	-	-	XP_025880691.1 pentatricopeptide repeat-containing protein At3g26540-like [Oryza sativa Japonica Group]	-	-	-	-
SK1G00044350	1.148	4.38	1.93181	1.36872e-12	2.79553e-11	P4H7	Metabolism;Metabolism	Global and overview maps;Amino acid metabolism	K00472;K00472	XP_015627937.1 probable prolyl 4-hydroxylase 6 [Oryza sativa Japonica Group]	ko01100//Metabolic pathways;ko00330//Arginine and proline metabolism	-	GO:0016491//oxidoreductase activity	GO:0055114//oxidation-reduction process
SK1G00058356	3.723	1.12933	-1.72099	1.45805e-12	2.95917e-11	MYB61	-	-	-	XP_025881490.1 transcription factor MYB61 [Oryza sativa Japonica Group]	-	-	-	-
SK1G00039889	7.083	2.344	-1.59539	1.46221e-12	2.96553e-11	dnaJ	-	-	-	XP_015622600.1 dnaJ protein homolog 1 [Oryza sativa Japonica Group]	-	-	GO:0005515//protein binding	GO:0006457//protein folding;GO:0009408//response to heat
SK1G00046878	67.405	27.9437	-1.27033	1.52759e-12	3.08947e-11	--	-	-	-	XP_015633236.1 suppressor of disruption of TFIIS [Oryza sativa Japonica Group]	-	-	GO:0008801//beta-phosphoglucomutase activity;GO:0008967//phosphoglycolate phosphatase activity;GO:0016787//hydrolase activity;GO:0016791//phosphatase activity;GO:0016862//intramolecular oxidoreductase activity, interconverting keto- and enol-groups;GO:0018784//(S)-2-haloacid dehalogenase activity	GO:0006805//xenobiotic metabolic process;GO:0008152//metabolic process;GO:0009853//photorespiration;GO:0015671//oxygen transport;GO:0019509//L-methionine biosynthetic process from methylthioadenosine;GO:0043094//cellular metabolic compound salvage;GO:0046352//disaccharide catabolic process
SK1G00048356	71.163	144.702	1.02389	1.55956e-12	3.15193e-11	--	-	-	-	-	-	-	-	-
SK1G00064967	15.038	7.257	-1.05117	1.56556e-12	3.16185e-11	rub	-	-	-	XP_015648803.1 uncharacterized protein LOC4345270 [Oryza sativa Japonica Group]	-	-	GO:0003700//transcription factor activity, sequence-specific DNA binding;GO:0005506//iron ion binding;GO:0016151//nickel cation binding	GO:0006351//transcription, DNA-templated;GO:0051604//protein maturation
SK1G00055286	5.15	1.232	-2.06357	1.58107e-12	3.19093e-11	--	-	-	-	XP_015641598.1 uncharacterized protein LOC9270467 [Oryza sativa Japonica Group]	-	-	GO:0008168//methyltransferase activity;GO:0050568//protein-glutamine glutaminase activity	GO:0006935//chemotaxis
MSTRG.23563	9.369	23.0787	1.30059	1.59388e-12	3.21455e-11	--	Metabolism;Metabolism;Metabolism	Global and overview maps;Global and overview maps;Biosynthesis of other secondary metabolites	K00430;K00430;K00430	Os08g0454400 [Oryza sativa Japonica Group]	ko01100//Metabolic pathways;ko01110//Biosynthesis of secondary metabolites;ko00940//Phenylpropanoid biosynthesis	-	-	-
SK1G00070135	5.905	12.0313	1.02679	1.70405e-12	3.42242e-11	SARD1	-	-	-	EEC69484.1 hypothetical protein OsI_38699 [Oryza sativa Indica Group]	-	GO:0019012//virion	GO:0005198//structural molecule activity;GO:0005516//calmodulin binding	GO:0019068//virion assembly
SK1G00039718	19.966	9.29933	-1.10235	1.70889e-12	3.42977e-11	CXE16	-	-	-	EAY76860.1 hypothetical protein OsI_04819 [Oryza sativa Indica Group]	-	-	GO:0016787//hydrolase activity	-
SK1G00070787	2.199	0.816	-1.43021	1.75886e-12	3.52027e-11	4CLL2	Metabolism;Metabolism;Metabolism;Metabolism	Global and overview maps;Global and overview maps;Biosynthesis of other secondary metabolites;Metabolism of cofactors and vitamins	K01904;K01904;K01904;K01904	XP_015614233.1 4-coumarate--CoA ligase-like 2 [Oryza sativa Japonica Group]	ko01100//Metabolic pathways;ko01110//Biosynthesis of secondary metabolites;ko00940//Phenylpropanoid biosynthesis;ko00130//Ubiquinone and other terpenoid-quinone biosynthesis	-	GO:0003987//acetate-CoA ligase activity;GO:0004043//L-aminoadipate-semialdehyde dehydrogenase activity;GO:0008668//(2,3-dihydroxybenzoyl)adenylate synthase activity;GO:0008756//o-succinylbenzoate-CoA ligase activity;GO:0030729//acetoacetate-CoA ligase activity;GO:0047473//D-alanine-poly(phosphoribitol) ligase activity;GO:0047475//phenylacetate-CoA ligase activity;GO:0050218//propionate-CoA ligase…	GO:0009234//menaquinone biosynthetic process;GO:0010124//phenylacetate catabolic process;GO:0019287//isopentenyl diphosphate biosynthetic process, mevalonate pathway;GO:0019290//siderophore biosynthetic process;GO:0019350//teichoic acid biosynthetic process;GO:0019427//acetyl-CoA biosynthetic process from acetate;GO:0019878//lysine biosynthetic process via aminoadipic acid
SK1G00066012	0.322	1.62667	2.33679	1.7709e-12	3.5397e-11	At3g27220	-	-	-	EEC82848.1 hypothetical protein OsI_27676 [Oryza sativa Indica Group]	-	-	GO:0005515//protein binding	-
SK1G00050664	1.501	3.31933	1.14497	1.84312e-12	3.66861e-11	--	-	-	-	EAY85497.1 hypothetical protein OsI_06877 [Oryza sativa Indica Group]	-	-	-	-
SK1G00042847	0.26	0.917333	1.81893	1.92121e-12	3.80571e-11	PCMP-E13	-	-	-	XP_025880247.1 pentatricopeptide repeat-containing protein At5g56310-like [Oryza sativa Japonica Group]	-	-	GO:0005515//protein binding;GO:0008270//zinc ion binding	-
SK1G00047428	1.209	4.93567	2.02943	1.97218e-12	3.89866e-11	RIPK	-	-	-	XP_015630876.1 serine/threonine-protein kinase RIPK [Oryza sativa Japonica Group]	-	-	GO:0004672//protein kinase activity;GO:0005524//ATP binding	GO:0006468//protein phosphorylation
SK1G00054962	94.994	40.332	-1.23591	2.04415e-12	4.02717e-11	ERF3	-	-	-	XP_015634065.1 ethylene-responsive transcription factor 7 [Oryza sativa Japonica Group]	-	-	GO:0003700//transcription factor activity, sequence-specific DNA binding	GO:0006355//regulation of transcription, DNA-templated
SK1G00073503	2.739	6.205	1.17978	2.10563e-12	4.13983e-11	RGA1	-	-	-	EEE69571.1 hypothetical protein OsJ_29091 [Oryza sativa Japonica Group]	-	-	GO:0003924//GTPase activity;GO:0005047//signal recognition particle binding;GO:0005515//protein binding;GO:0005524//ATP binding;GO:0008134//transcription factor binding;GO:0009378//four-way junction helicase activity;GO:0016887//ATPase activity;GO:0043531//ADP binding	GO:0006281//DNA repair;GO:0006310//DNA recombination;GO:0006355//regulation of transcription, DNA-templated;GO:0009306//protein secretion
SK1G00059530	2.263	5.136	1.18241	2.22683e-12	4.35739e-11	CYP94A2	-	-	-	XP_015637521.1 cytochrome P450 94B3 [Oryza sativa Japonica Group]	-	-	GO:0005506//iron ion binding;GO:0016705//oxidoreductase activity, acting on paired donors, with incorporation or reduction of molecular oxygen;GO:0020037//heme binding	GO:0055114//oxidation-reduction process
SK1G00063603	15.485	6.26967	-1.30441	2.28378e-12	4.45076e-11	PGR5	-	-	-	XP_015648288.1 protein PROTON GRADIENT REGULATION 5, chloroplastic [Oryza sativa Japonica Group]	-	-	-	-
SK1G00061026	5.478	1.51533	-1.85401	2.29352e-12	4.46372e-11	faeA	-	-	-	XP_015645113.1 lipase isoform X3 [Oryza sativa Japonica Group]	-	-	GO:0016787//hydrolase activity;GO:0016788//hydrolase activity, acting on ester bonds	GO:0006629//lipid metabolic process
SK1G00047297	139.911	69.0703	-1.01837	2.29774e-12	4.46893e-11	PLT5	-	-	-	XP_015632646.1 polyol transporter 5 [Oryza sativa Japonica Group]	-	GO:0005887//integral component of plasma membrane;GO:0016021//integral component of membrane	GO:0008028//monocarboxylic acid transmembrane transporter activity;GO:0015098//molybdate ion transmembrane transporter activity;GO:0015114//phosphate ion transmembrane transporter activity;GO:0015238//drug transmembrane transporter activity;GO:0015295//solute:proton symporter activity;GO:0015307//drug:proton antiporter activity;GO:0015542//sugar efflux transmembrane transporter activity;GO:002285…	GO:0006810//transport;GO:0006817//phosphate ion transport;GO:0006855//drug transmembrane transport;GO:0008643//carbohydrate transport;GO:0015689//molybdate ion transport;GO:0015718//monocarboxylic acid transport;GO:0015893//drug transport;GO:0042493//response to drug;GO:0042908//xenobiotic transport;GO:0055085//transmembrane transport
SK1G00042835	12.383	5.09033	-1.28253	2.42772e-12	4.69959e-11	--	-	-	-	EEC70353.1 hypothetical protein OsI_01272 [Oryza sativa Indica Group]	-	GO:0016021//integral component of membrane	-	-
SK1G00063923	1.814	0.9	-1.01118	2.47684e-12	4.78827e-11	--	-	-	-	EEE69008.1 hypothetical protein OsJ_27955 [Oryza sativa Japonica Group]	-	-	-	-
SK1G00052273	8.26	3.883	-1.08897	2.48789e-12	4.80643e-11	PHT1-4	-	-	-	Q01MW8.2 RecName: Full=Probable inorganic phosphate transporter 1-4; Short=OsPT4; Short=OsPht1;4; AltName: Full=H(+)/Pi cotransporter; AltName: Full=OsPT1 [Oryza sativa Indica Group]	-	GO:0005887//integral component of plasma membrane;GO:0016020//membrane;GO:0016021//integral component of membrane	GO:0008028//monocarboxylic acid transmembrane transporter activity;GO:0015114//phosphate ion transmembrane transporter activity;GO:0015238//drug transmembrane transporter activity;GO:0015295//solute:proton symporter activity;GO:0022857//transmembrane transporter activity;GO:0042910//xenobiotic transporter activity;GO:0051119//sugar transmembrane transporter activity	GO:0006810//transport;GO:0006817//phosphate ion transport;GO:0008643//carbohydrate transport;GO:0015718//monocarboxylic acid transport;GO:0015893//drug transport;GO:0042908//xenobiotic transport;GO:0055085//transmembrane transport
SK1G00059437	21.814	9.27967	-1.23311	2.51176e-12	4.84607e-11	BGLU19	Metabolism;Metabolism;Metabolism;Metabolism;Metabolism	Global and overview maps;Global and overview maps;Biosynthesis of other secondary metabolites;Carbohydrate metabolism;Metabolism of other amino acids	K01188;K01188;K01188;K01188;K01188	XP_015639292.1 beta-glucosidase 19 isoform X1 [Oryza sativa Japonica Group]	ko01100//Metabolic pathways;ko01110//Biosynthesis of secondary metabolites;ko00940//Phenylpropanoid biosynthesis;ko00500//Starch and sucrose metabolism;ko00460//Cyanoamino acid metabolism	GO:0009341//beta-galactosidase complex	GO:0004553//hydrolase activity, hydrolyzing O-glycosyl compounds;GO:0004565//beta-galactosidase activity	GO:0005975//carbohydrate metabolic process;GO:0006012//galactose metabolic process
SK1G00050214	108.941	46.6597	-1.2233	2.67736e-12	5.13134e-11	PUB9	-	-	-	XP_015626779.1 U-box domain-containing protein 9 [Oryza sativa Japonica Group]	-	-	GO:0004842//ubiquitin-protein transferase activity;GO:0005515//protein binding;GO:0008270//zinc ion binding	GO:0016567//protein ubiquitination
SK1G00060148	64.583	14.213	-2.18394	2.71966e-12	5.20207e-11	Os05g0495700	Metabolism;Metabolism	Global and overview maps;Lipid metabolism	K00006;K00006	XP_015637865.1 probable glycerol-3-phosphate dehydrogenase [NAD(+)] 3, cytosolic [Oryza sativa Japonica Group]	ko01110//Biosynthesis of secondary metabolites;ko00564//Glycerophospholipid metabolism	-	GO:0004367//glycerol-3-phosphate dehydrogenase [NAD+] activity;GO:0016616//oxidoreductase activity, acting on the CH-OH group of donors, NAD or NADP as acceptor;GO:0051287//NAD binding	GO:0005975//carbohydrate metabolic process;GO:0046168//glycerol-3-phosphate catabolic process;GO:0055114//oxidation-reduction process
SK1G00064960	0.135	1.33967	3.31084	2.75268e-12	5.25827e-11	At1g74360	-	-	-	XP_015648807.1 probable LRR receptor-like serine/threonine-protein kinase At1g74360 [Oryza sativa Japonica Group]	-	-	GO:0005515//protein binding	-
SK1G00047169	3.761	7.75633	1.04426	2.80062e-12	5.34631e-11	MODD	-	-	-	EAY89035.1 hypothetical protein OsI_10519 [Oryza sativa Indica Group]	-	-	GO:0003677//DNA binding	-
SK1G00070948	18.389	4.48333	-2.0362	2.89529e-12	5.51249e-11	GSTU6	Metabolism;Metabolism	Global and overview maps;Metabolism of other amino acids	K00799;K00799	EAY79303.1 hypothetical protein OsI_34429 [Oryza sativa Indica Group]	ko01100//Metabolic pathways;ko00480//Glutathione metabolism	-	GO:0005515//protein binding;GO:0015035//protein disulfide oxidoreductase activity;GO:0016034//maleylacetoacetate isomerase activity	GO:0006559//L-phenylalanine catabolic process;GO:0006572//tyrosine catabolic process;GO:0006749//glutathione metabolic process;GO:0006790//sulfur compound metabolic process;GO:0042965//glutaredoxin biosynthetic process;GO:0045454//cell redox homeostasis;GO:0055114//oxidation-reduction process
SK1G00043282	1.019	2.82867	1.47297	3.07059e-12	5.82326e-11	TKI1	-	-	-	EEE53998.1 hypothetical protein OsJ_00639 [Oryza sativa Japonica Group]	-	-	-	-
SK1G00064217	105.932	14.2637	-2.89272	3.08722e-12	5.84712e-11	ERF109	-	-	-	XP_015649367.1 ethylene-responsive transcription factor ERF109 [Oryza sativa Japonica Group]	-	-	GO:0003700//transcription factor activity, sequence-specific DNA binding	GO:0006355//regulation of transcription, DNA-templated
SK1G00072191	0.587	2.13467	1.86258	3.19139e-12	6.03256e-11	--	-	-	-	AAP52983.1 F-box domain containing protein [Oryza sativa Japonica Group]	-	-	GO:0005515//protein binding;GO:0008270//zinc ion binding	-
SK1G00050010	124.363	256.276	1.04314	3.22881e-12	6.09534e-11	CLPD1	-	-	-	AAN78327.1 ATP-dependent Clp protease ATP-binding subunit precursor [Oryza sativa Indica Group]	-	GO:0000502//proteasome complex;GO:0005840//ribosome;GO:0009360//DNA polymerase III complex;GO:0009368//endopeptidase Clp complex;GO:0009376//HslUV protease complex;GO:0009379//Holliday junction helicase complex;GO:0033104//type VI protein secretion system complex	GO:0000156//phosphorelay response regulator activity;GO:0003677//DNA binding;GO:0003678//DNA helicase activity;GO:0003688//DNA replication origin binding;GO:0003723//RNA binding;GO:0003724//RNA helicase activity;GO:0003735//structural constituent of ribosome;GO:0003887//DNA-directed DNA polymerase activity;GO:0003924//GTPase activity;GO:0004176//ATP-dependent peptidase activity;GO:0004222//metall…	GO:0002949//tRNA threonylcarbamoyladenosine modification;GO:0006260//DNA replication;GO:0006270//DNA replication initiation;GO:0006275//regulation of DNA replication;GO:0006281//DNA repair;GO:0006310//DNA recombination;GO:0006355//regulation of transcription, DNA-templated;GO:0006412//translation;GO:0006457//protein folding;GO:0006508//proteolysis;GO:0006614//SRP-dependent cotranslational protein…
SK1G00064025	285.941	135.912	-1.07304	3.39702e-12	6.392e-11	SAP11	-	-	-	XP_015651039.1 zinc finger A20 and AN1 domain-containing stress-associated protein 11 [Oryza sativa Japonica Group]	-	-	GO:0003677//DNA binding;GO:0008270//zinc ion binding	-
SK1G00064413	23.96	9.805	-1.28904	3.4639e-12	6.50095e-11	CPLS1	-	-	-	XP_015648601.1 ATP-dependent Clp protease adapter protein CLPS1, chloroplastic [Oryza sativa Japonica Group]	-	-	GO:0030976//thiamine pyrophosphate binding	GO:0030163//protein catabolic process
SK1G00050882	5.694	12.2343	1.10342	3.51979e-12	6.59727e-11	PEX7	Cellular Processes	Transport and catabolism	K13341	XP_015624658.1 peroxisome biogenesis protein 7 [Oryza sativa Japonica Group]	ko04146//Peroxisome	-	GO:0005515//protein binding	-
SK1G00073521	20.555	41.7207	1.02127	3.61078e-12	6.74595e-11	--	-	-	-	XP_015612219.1 uncharacterized protein LOC4346860 [Oryza sativa Japonica Group]	-	-	-	-
SK1G00047501	5.642	17.3677	1.62213	3.61975e-12	6.75835e-11	At5g42250	Metabolism;Metabolism;Metabolism;Metabolism;Metabolism;Metabolism	Global and overview maps;Global and overview maps;Global and overview maps;Carbohydrate metabolism;Lipid metabolism;Amino acid metabolism	K00121;K00121;K00121;K00121;K00121;K00121	XP_015630763.1 alcohol dehydrogenase-like 7 [Oryza sativa Japonica Group]	ko01100//Metabolic pathways;ko01110//Biosynthesis of secondary metabolites;ko01200//Carbon metabolism;ko00010//Glycolysis / Gluconeogenesis;ko00071//Fatty acid degradation;ko00350//Tyrosine metabolism	-	GO:0004024//alcohol dehydrogenase activity, zinc-dependent;GO:0004471//malate dehydrogenase (decarboxylating) (NAD+) activity;GO:0005524//ATP binding;GO:0008270//zinc ion binding;GO:0008743//L-threonine 3-dehydrogenase activity;GO:0016491//oxidoreductase activity;GO:0016655//oxidoreductase activity, acting on NAD(P)H, quinone or similar compound as acceptor;GO:0018467//formaldehyde dehydrogenase …	GO:0006113//fermentation;GO:0006567//threonine catabolic process;GO:0007059//chromosome segregation;GO:0008152//metabolic process;GO:0009404//toxin metabolic process;GO:0010127//mycothiol-dependent detoxification;GO:0019439//aromatic compound catabolic process;GO:0030261//chromosome condensation;GO:0030494//bacteriochlorophyll biosynthetic process;GO:0046292//formaldehyde metabolic process;GO:005…
SK1G00047215	19.759	45.1833	1.19328	3.65608e-12	6.8086e-11	At2g19130	-	-	-	XP_015631412.1 G-type lectin S-receptor-like serine/threonine-protein kinase At2g19130 [Oryza sativa Japonica Group]	-	GO:0016010//dystrophin-associated glycoprotein complex	GO:0004672//protein kinase activity;GO:0005524//ATP binding;GO:0016709//oxidoreductase activity, acting on paired donors, with incorporation or reduction of molecular oxygen, NAD(P)H as one donor, and incorporation of one atom of oxygen	GO:0006468//protein phosphorylation;GO:0006744//ubiquinone biosynthetic process;GO:0048544//recognition of pollen
SK1G00049604	4.515	1.904	-1.24569	3.67335e-12	6.83636e-11	--	-	-	-	EAY86516.1 hypothetical protein OsI_07895 [Oryza sativa Indica Group]	-	-	-	-
SK1G00058115	0.055	0.722	3.7145	3.72105e-12	6.91622e-11	PGIP2	-	-	-	EEC78352.1 hypothetical protein OsI_18105 [Oryza sativa Indica Group]	-	GO:0005576//extracellular region	GO:0005515//protein binding;GO:0008200//ion channel inhibitor activity	GO:0009405//pathogenesis
SK1G00055341	0.932	0.380667	-1.2918	3.75363e-12	6.97231e-11	RPP13L3	-	-	-	XP_015644063.1 putative disease resistance RPP13-like protein 3 [Oryza sativa Japonica Group]	-	-	GO:0005515//protein binding;GO:0008080//N-acetyltransferase activity;GO:0043531//ADP binding	-
SK1G00046734	6.166	21.5593	1.80591	3.7565e-12	6.97316e-11	At3g11180	-	-	-	EAY89569.1 hypothetical protein OsI_11101 [Oryza sativa Indica Group]	-	-	GO:0016491//oxidoreductase activity	GO:0055114//oxidation-reduction process
SK1G00041790	0.001	1.13167	10.1442	3.82718e-12	7.08616e-11	Tf2-12	-	-	-	CAE03706.1 OSJNBa0060B20.14 [Oryza sativa Japonica Group]	-	-	GO:0004190//aspartic-type endopeptidase activity	GO:0006508//proteolysis;GO:0015074//DNA integration
SK1G00043586	11.705	5.80833	-1.01093	3.83031e-12	7.08743e-11	TIC32B	-	-	-	XP_015628130.1 short-chain dehydrogenase TIC 32, chloroplastic [Oryza sativa Japonica Group]	-	-	GO:0003824//catalytic activity;GO:0004316//3-oxoacyl-[acyl-carrier-protein] reductase (NADPH) activity;GO:0004757//sepiapterin reductase activity;GO:0008667//2,3-dihydro-2,3-dihydroxybenzoate dehydrogenase activity;GO:0008678//2-deoxy-D-gluconate 3-dehydrogenase activity;GO:0016491//oxidoreductase activity;GO:0016630//protochlorophyllide reductase activity;GO:0016655//oxidoreductase activity, act…	GO:0000272//polysaccharide catabolic process;GO:0005975//carbohydrate metabolic process;GO:0006633//fatty acid biosynthetic process;GO:0006729//tetrahydrobiopterin biosynthetic process;GO:0008152//metabolic process;GO:0015995//chlorophyll biosynthetic process;GO:0055114//oxidation-reduction process
SK1G00043212	4.065	8.62833	1.08583	3.8705e-12	7.14806e-11	--	-	-	-	EEC66931.1 hypothetical protein OsI_33540 [Oryza sativa Indica Group]	-	-	-	-
MSTRG.6115	1.623	0.585	-1.47215	3.92879e-12	7.23723e-11	--	-	-	-	Os08g0396100, partial [Oryza sativa Japonica Group]	-	-	-	-
SK1G00053837	1.811	0.464667	-1.96252	3.96043e-12	7.29088e-11	At3g07570	-	-	-	XP_015633412.1 cytochrome b561 and DOMON domain-containing protein At3g07570 [Oryza sativa Japonica Group]	-	-	-	-
SK1G00047033	5.054	11.149	1.14142	4.00484e-12	7.36551e-11	SHW1	-	-	-	XP_015631337.1 protein SHORT HYPOCOTYL IN WHITE LIGHT 1 [Oryza sativa Japonica Group]	-	GO:0000775//chromosome, centromeric region;GO:0005681//spliceosomal complex	GO:0003677//DNA binding;GO:0003682//chromatin binding	GO:0000398//mRNA splicing, via spliceosome
SK1G00053675	1.965	0.753	-1.38381	4.11201e-12	7.54112e-11	GDPDL3	-	-	-	CAH67272.1 B0806H07.1 [Oryza sativa]	-	-	GO:0008081//phosphoric diester hydrolase activity	GO:0006629//lipid metabolic process
SK1G00060460	3.708	7.47433	1.0113	4.13243e-12	7.57376e-11	At5g56450	-	-	-	XP_015639210.1 probable ADP,ATP carrier protein At5g56450 [Oryza sativa Japonica Group]	-	-	-	-
SK1G00068372	0.064	1.03667	4.01774	4.26109e-12	7.79475e-11	--	-	-	-	CAD41274.2 OSJNBb0103I08.13 [Oryza sativa Japonica Group]	-	-	-	-
SK1G00063448	15.235	46.292	1.60337	4.31148e-12	7.87695e-11	EFM	-	-	-	XP_015644652.1 myb family transcription factor EFM [Oryza sativa Japonica Group]	-	GO:0009523//photosystem II;GO:0009654//photosystem II oxygen evolving complex;GO:0019898//extrinsic component of membrane	GO:0005509//calcium ion binding	GO:0015979//photosynthesis
MSTRG.23965	0.066	0.571333	3.11379	4.36629e-12	7.95699e-11	--	-	-	-	Transposon, En/Spm-like protein [Corchorus capsularis]	-	-	-	-
SK1G00050001	13.97	51.3417	1.8778	4.37617e-12	7.96998e-11	CTR1	Environmental Information Processing;Environmental Information Processing	Signal transduction;Signal transduction	K14510;K14510	KAF2945099.1 hypothetical protein DAI22_02g192400 [Oryza sativa Japonica Group]	ko04075//Plant hormone signal transduction;ko04016//MAPK signaling pathway - plant	-	GO:0004672//protein kinase activity;GO:0005524//ATP binding	GO:0006468//protein phosphorylation
SK1G00065249	3.444	0.982333	-1.8098	4.43853e-12	8.07338e-11	--	-	-	-	XP_015651101.1 uncharacterized protein LOC4345134 [Oryza sativa Japonica Group]	-	-	-	-
SK1G00060503	19.605	4.897	-2.00125	4.4877e-12	8.15769e-11	MAPKKK17	Environmental Information Processing	Signal transduction	K20716	KAF2931928.1 hypothetical protein DAI22_05g247400 [Oryza sativa Japonica Group]	ko04016//MAPK signaling pathway - plant	-	GO:0004672//protein kinase activity;GO:0005524//ATP binding	GO:0006468//protein phosphorylation
SK1G00041736	22.088	10.8277	-1.02854	4.58222e-12	8.31383e-11	--	-	-	-	XP_015630527.1 putative transcription factor bHLH041 [Oryza sativa Japonica Group]	-	-	GO:0003723//RNA binding;GO:0046983//protein dimerization activity	-
SK1G00067129	12.334	4.50967	-1.45155	4.72461e-12	8.56143e-11	RGA5	-	-	-	EEC79848.1 hypothetical protein OsI_21327 [Oryza sativa Indica Group]	-	GO:0009379//Holliday junction helicase complex	GO:0005524//ATP binding;GO:0008134//transcription factor binding;GO:0009378//four-way junction helicase activity;GO:0043531//ADP binding	GO:0006281//DNA repair;GO:0006310//DNA recombination;GO:0006355//regulation of transcription, DNA-templated
SK1G00046902	0.038	1.498	5.30089	4.80156e-12	8.68999e-11	CRRSP55	-	-	-	EAY89462.1 hypothetical protein OsI_10995 [Oryza sativa Indica Group]	-	-	-	-
SK1G00067159	1.152	0.250667	-2.2003	5.22322e-12	9.40602e-11	CYP78A5	-	-	-	XP_015615492.1 cytochrome P450 78A5 [Oryza sativa Japonica Group]	-	-	GO:0005506//iron ion binding;GO:0016705//oxidoreductase activity, acting on paired donors, with incorporation or reduction of molecular oxygen;GO:0020037//heme binding	GO:0055114//oxidation-reduction process
SK1G00064773	23.088	92.5673	2.00336	5.52955e-12	9.89606e-11	CCD1	-	-	-	XP_025875749.1 carotenoid 9,10(9',10')-cleavage dioxygenase 1 [Oryza sativa Japonica Group]	-	-	GO:0016702//oxidoreductase activity, acting on single donors with incorporation of molecular oxygen, incorporation of two atoms of oxygen	GO:0055114//oxidation-reduction process
SK1G00043998	21.97	7.62633	-1.52647	5.65607e-12	1.00945e-10	CESA5	-	-	-	XP_015631790.1 probable cellulose synthase A catalytic subunit 5 [UDP-forming] [Oryza sativa Japonica Group]	-	GO:0000109//nucleotide-excision repair complex;GO:0005675//holo TFIIH complex;GO:0016020//membrane	GO:0004693//cyclin-dependent protein serine/threonine kinase activity;GO:0008375//acetylglucosaminyltransferase activity;GO:0016760//cellulose synthase (UDP-forming) activity	GO:0006289//nucleotide-excision repair;GO:0006352//DNA-templated transcription, initiation;GO:0030244//cellulose biosynthetic process;GO:0042710//biofilm formation
SK1G00048948	9.034	3.58767	-1.33232	5.72908e-12	1.02152e-10	AOX1C	-	-	-	XP_015623809.1 ubiquinol oxidase 1c, mitochondrial-like [Oryza sativa Japonica Group]	-	-	GO:0004497//monooxygenase activity;GO:0009916//alternative oxidase activity	GO:0006744//ubiquinone biosynthetic process;GO:0055114//oxidation-reduction process
SK1G00058266	6.066	12.851	1.08306	5.76413e-12	1.02714e-10	--	-	-	-	BAH92950.1 Os05g0152201 [Oryza sativa Japonica Group]	-	-	-	-
MSTRG.8032	0.327	1.28567	1.97515	5.78426e-12	1.03009e-10	NUP58	Genetic Information Processing	Translation	K14307	nuclear pore complex protein NUP58 isoform X1 [Oryza sativa Japonica Group]	ko03013//RNA transport	-	-	-
SK1G00048149	8.365	16.9293	1.01709	5.80377e-12	1.03229e-10	TBP1	-	-	-	XP_015625433.1 telomere-binding protein 1 [Oryza sativa Japonica Group]	-	-	GO:0005515//protein binding	-
SK1G00073963	2.826	0.491333	-2.52399	6.55441e-12	1.15868e-10	--	-	-	-	EEC84646.1 hypothetical protein OsI_31535 [Oryza sativa Indica Group]	-	-	-	-
SK1G00060105	3.922	1.67467	-1.22772	6.66469e-12	1.17674e-10	CNGC4	Organismal Systems	Environmental adaptation	K05391	XP_015637795.1 cyclic nucleotide-gated ion channel 4 [Oryza sativa Japonica Group]	ko04626//Plant-pathogen interaction	GO:0016020//membrane	GO:0005216//ion channel activity	GO:0006811//ion transport;GO:0055085//transmembrane transport
SK1G00045432	6.826	14.1647	1.05318	7.06299e-12	1.24025e-10	--	-	-	-	XP_015693855.1 PREDICTED: putative nuclease HARBI1 [Oryza brachyantha]	-	-	GO:0003677//DNA binding;GO:0004803//transposase activity	GO:0006313//transposition, DNA-mediated
SK1G00040103	79.934	28.1327	-1.50656	7.19971e-12	1.26119e-10	ERG1	-	-	-	XP_015616516.1 elicitor-responsive protein 1 [Oryza sativa Japonica Group]	-	-	-	-
SK1G00049598	0.386	3.12967	3.01934	7.25743e-12	1.27053e-10	NAR2.1	-	-	-	XP_015623791.1 high-affinity nitrate transporter-activating protein 2.1 [Oryza sativa Japonica Group]	-	-	-	GO:0010167//response to nitrate;GO:0015706//nitrate transport
SK1G00051314	0.422	1.46333	1.79394	7.32124e-12	1.28016e-10	At4g10320	Genetic Information Processing	Translation	K01870	XP_015623186.1 LOW QUALITY PROTEIN: isoleucine--tRNA ligase, cytoplasmic-like [Oryza sativa Japonica Group]	ko00970//Aminoacyl-tRNA biosynthesis	GO:0005737//cytoplasm	GO:0000166//nucleotide binding;GO:0004812//aminoacyl-tRNA ligase activity;GO:0004817//cysteine-tRNA ligase activity;GO:0004822//isoleucine-tRNA ligase activity;GO:0004823//leucine-tRNA ligase activity;GO:0004824//lysine-tRNA ligase activity;GO:0004825//methionine-tRNA ligase activity;GO:0004832//valine-tRNA ligase activity;GO:0005524//ATP binding	GO:0006418//tRNA aminoacylation for protein translation;GO:0006423//cysteinyl-tRNA aminoacylation;GO:0006428//isoleucyl-tRNA aminoacylation;GO:0006429//leucyl-tRNA aminoacylation;GO:0006430//lysyl-tRNA aminoacylation;GO:0006431//methionyl-tRNA aminoacylation;GO:0006438//valyl-tRNA aminoacylation
SK1G00058401	27.057	57.2673	1.08171	7.40857e-12	1.29464e-10	ACX4	Metabolism;Metabolism;Metabolism;Cellular Processes;Metabolism;Metabolism;Metabolism;Metabolism;Metabolism;Metabolism	Global and overview maps;Global and overview maps;Global and overview maps;Transport and catabolism;Global and overview maps;Lipid metabolism;Lipid metabolism;Metabolism of other amino acids;Lipid metabolism;Carbohydrate metabolism	K00232;K00232;K00232;K00232;K00232;K00232;K00232;K00232;K00232;K00232	XP_015639971.1 acyl-coenzyme A oxidase 4, peroxisomal isoform X1 [Oryza sativa Japonica Group]	ko01100//Metabolic pathways;ko01110//Biosynthesis of secondary metabolites;ko01200//Carbon metabolism;ko04146//Peroxisome;ko01212//Fatty acid metabolism;ko00592//alpha-Linolenic acid metabolism;ko00071//Fatty acid degradation;ko00410//beta-Alanine metabolism;ko01040//Biosynthesis of unsaturated fatty acids;ko00640//Propanoate metabolism	-	GO:0016491//oxidoreductase activity;GO:0016627//oxidoreductase activity, acting on the CH-CH group of donors;GO:0018515//pimeloyl-CoA dehydrogenase activity;GO:0050660//flavin adenine dinucleotide binding	GO:0006790//sulfur compound metabolic process;GO:0055114//oxidation-reduction process
SK1G00058200	22.54	10.0263	-1.16869	7.7017e-12	1.34505e-10	CCR3	-	-	-	XP_015637316.1 putative serine/threonine-protein kinase-like protein CCR3 [Oryza sativa Japonica Group]	-	-	GO:0004672//protein kinase activity;GO:0005524//ATP binding	GO:0006468//protein phosphorylation
SK1G00057326	2.504	0.953667	-1.39268	7.86942e-12	1.37103e-10	abhd17c	-	-	-	XP_015641707.1 alpha/beta hydrolase domain-containing protein 17C [Oryza sativa Japonica Group]	-	-	GO:0004806//triglyceride lipase activity;GO:0008236//serine-type peptidase activity;GO:0016787//hydrolase activity	GO:0006508//proteolysis;GO:0016042//lipid catabolic process
SK1G00044779	11.198	24.4813	1.12844	7.89318e-12	1.37352e-10	F22B5.10	-	-	-	XP_015633352.1 calcium load-activated calcium channel [Oryza sativa Japonica Group]	-	GO:0016020//membrane	-	-
SK1G00064249	24.754	8.91367	-1.47357	7.93554e-12	1.3784e-10	NIA1	Metabolism;Metabolism	Global and overview maps;Energy metabolism	K10534;K10534	XP_015650300.1 nitrate reductase [NADH] 1 [Oryza sativa Japonica Group]	ko01100//Metabolic pathways;ko00910//Nitrogen metabolism	-	GO:0009055//electron carrier activity;GO:0016002//sulfite reductase activity;GO:0016491//oxidoreductase activity;GO:0016655//oxidoreductase activity, acting on NAD(P)H, quinone or similar compound as acceptor;GO:0030151//molybdenum ion binding	GO:0006790//sulfur compound metabolic process;GO:0006814//sodium ion transport;GO:0010124//phenylacetate catabolic process;GO:0055114//oxidation-reduction process
SK1G00043700	0.434	1.20267	1.47047	8.05163e-12	1.39689e-10	RLP35	-	-	-	BAF03844.1 Os01g0132100 [Oryza sativa Japonica Group]	-	-	GO:0005515//protein binding	-
SK1G00049232	0.912	3.31867	1.8635	8.49503e-12	1.46853e-10	--	-	-	-	BAF09518.1 Os02g0653300 [Oryza sativa Japonica Group]	-	-	-	-
SK1G00054350	6.747	16.4023	1.28158	8.93435e-12	1.53987e-10	ATL47	-	-	-	XP_015634328.1 putative RING-H2 finger protein ATL50 [Oryza sativa Japonica Group]	-	GO:0005680//anaphase-promoting complex	GO:0008270//zinc ion binding;GO:0046872//metal ion binding;GO:0061630//ubiquitin protein ligase activity;GO:0097602//cullin family protein binding	GO:0031145//anaphase-promoting complex-dependent proteasomal ubiquitin-dependent protein catabolic process
SK1G00041691	204.139	96.1103	-1.08679	8.94673e-12	1.54109e-10	--	-	-	-	KAB8082007.1 hypothetical protein EE612_003725 [Oryza sativa]	-	-	GO:0016788//hydrolase activity, acting on ester bonds	-
SK1G00055731	0.51	2.43967	2.25811	9.0928e-12	1.56252e-10	--	-	-	-	EAZ00062.1 hypothetical protein OsI_22067 [Oryza sativa Indica Group]	-	-	-	-
SK1G00044465	57.319	12.5557	-2.19067	9.50573e-12	1.62576e-10	--	-	-	-	EAY92061.1 hypothetical protein OsI_13759 [Oryza sativa Indica Group]	-	-	-	-
SK1G00050555	31.184	13.7153	-1.18502	9.73533e-12	1.66109e-10	ASPG1	-	-	-	EAY85563.1 hypothetical protein OsI_06935 [Oryza sativa Indica Group]	-	-	-	-
SK1G00040792	1.915	5.52067	1.5275	9.78166e-12	1.66802e-10	--	-	-	-	XP_015643594.1 pathogen-related protein [Oryza sativa Japonica Group]	-	-	-	GO:0030638//polyketide metabolic process
SK1G00064192	0.267	1.406	2.39668	1.0011e-11	1.70411e-10	AHL17	-	-	-	KAB8108885.1 hypothetical protein EE612_044916 [Oryza sativa]	-	-	-	-
SK1G00059512	6.225	14.1677	1.18646	1.02751e-11	1.74598e-10	COG5	-	-	-	XP_015640282.1 conserved oligomeric Golgi complex subunit 5 [Oryza sativa Japonica Group]	-	GO:0017119//Golgi transport complex	-	GO:0006891//intra-Golgi vesicle-mediated transport
SK1G00047549	49.636	22.203	-1.16063	1.03634e-11	1.7548e-10	MO2	-	-	-	EEC74541.1 hypothetical protein OsI_10065 [Oryza sativa Indica Group]	-	GO:0009331//glycerol-3-phosphate dehydrogenase complex;GO:0016021//integral component of membrane	GO:0003824//catalytic activity;GO:0004368//glycerol-3-phosphate dehydrogenase activity;GO:0004506//squalene monooxygenase activity;GO:0004791//thioredoxin-disulfide reductase activity;GO:0015036//disulfide oxidoreductase activity;GO:0016166//phytoene dehydrogenase activity;GO:0016491//oxidoreductase activity;GO:0016647//oxidoreductase activity, acting on the CH-NH group of donors, oxygen as accep…	GO:0006071//glycerol metabolic process;GO:0006744//ubiquinone biosynthetic process;GO:0006790//sulfur compound metabolic process;GO:0009228//thiamine biosynthetic process;GO:0015995//chlorophyll biosynthetic process;GO:0016117//carotenoid biosynthetic process;GO:0018874//benzoate metabolic process;GO:0030494//bacteriochlorophyll biosynthetic process;GO:0055114//oxidation-reduction process
SK1G00069467	43.66	21.7173	-1.00747	1.06113e-11	1.79259e-10	SPS3	Metabolism;Metabolism	Global and overview maps;Metabolism of terpenoids and polyketides	K05356;K05356	XP_015620200.1 probable solanesyl-diphosphate synthase 3, chloroplastic [Oryza sativa Japonica Group]	ko01110//Biosynthesis of secondary metabolites;ko00900//Terpenoid backbone biosynthesis	-	GO:0000010//trans-hexaprenyltranstransferase activity;GO:0050347//trans-octaprenyltranstransferase activity	GO:0008299//isoprenoid biosynthetic process;GO:0009234//menaquinone biosynthetic process;GO:0010236//plastoquinone biosynthetic process
SK1G00045438	0.582	0.208667	-1.47982	1.07816e-11	1.81923e-10	KAN4	-	-	-	XP_015629915.1 uncharacterized protein LOC9269134 isoform X2 [Oryza sativa Japonica Group]	-	-	-	-
SK1G00051638	355.074	125.619	-1.49907	1.0949e-11	1.84532e-10	BI1	-	-	-	XP_015625700.1 bax inhibitor 1 [Oryza sativa Japonica Group]	-	-	-	-
SK1G00047375	1.503	0.738333	-1.0255	1.15021e-11	1.93403e-10	PAT22	-	-	-	EEC74735.1 hypothetical protein OsI_10473 [Oryza sativa Indica Group]	-	-	GO:0016409//palmitoyltransferase activity	-
SK1G00068753	4.649	10.3237	1.15096	1.17551e-11	1.97198e-10	PP2B2	-	-	-	EEC68801.1 hypothetical protein OsI_37356 [Oryza sativa Indica Group]	-	-	-	-
SK1G00074651	3.182	6.879	1.11227	1.19138e-11	1.99629e-10	PILS7	-	-	-	XP_015612647.1 protein PIN-LIKES 7 [Oryza sativa Japonica Group]	-	GO:0016021//integral component of membrane	-	GO:0055085//transmembrane transport
SK1G00066772	0.653	1.732	1.40728	1.19554e-11	2.00093e-10	At5g06550	-	-	-	XP_015617023.1 F-box protein At5g06550 [Oryza sativa Japonica Group]	-	-	GO:0005515//protein binding	-
SK1G00072984	0.017	0.512333	4.91348	1.23068e-11	2.05618e-10	--	-	-	-	CAE02516.2 OSJNBb0003A12.3 [Oryza sativa Japonica Group]	-	-	-	GO:0015074//DNA integration
SK1G00040910	50.456	112.964	1.16276	1.23228e-11	2.05766e-10	BANGLUC	-	-	-	BAA77784.1 beta-1,3-glucanase [Oryza sativa]	-	-	GO:0004553//hydrolase activity, hydrolyzing O-glycosyl compounds	GO:0005975//carbohydrate metabolic process
SK1G00059468	0.862	2.67133	1.6318	1.25547e-11	2.09276e-10	PIR7A	-	-	-	XP_015637813.1 probable esterase PIR7A isoform X1 [Oryza sativa Japonica Group]	-	GO:0005576//extracellular region	GO:0003824//catalytic activity;GO:0008236//serine-type peptidase activity;GO:0016491//oxidoreductase activity;GO:0016787//hydrolase activity;GO:0016788//hydrolase activity, acting on ester bonds;GO:0047570//3-oxoadipate enol-lactonase activity;GO:0070205//2-succinyl-6-hydroxy-2,4-cyclohexadiene-1-carboxylate synthase activity	GO:0006508//proteolysis;GO:0009102//biotin biosynthetic process;GO:0009234//menaquinone biosynthetic process;GO:0042952//beta-ketoadipate pathway;GO:0055114//oxidation-reduction process
SK1G00044357	9.005	2.82233	-1.67384	1.2569e-11	2.09394e-10	--	-	-	-	KAF2941894.1 hypothetical protein DAI22_03g380400 [Oryza sativa Japonica Group]	-	-	-	-
SK1G00041366	3.354	1.31167	-1.35448	1.33736e-11	2.21776e-10	TOGT1	-	-	-	EAY75111.1 hypothetical protein OsI_03006 [Oryza sativa Indica Group]	-	-	GO:0008194//UDP-glycosyltransferase activity;GO:0016758//transferase activity, transferring hexosyl groups	-
SK1G00047657	106.31	217.492	1.03269	1.41547e-11	2.33657e-10	CDF2	-	-	-	XP_015631794.1 cyclic dof factor 1 [Oryza sativa Japonica Group]	-	-	GO:0003677//DNA binding	GO:0006355//regulation of transcription, DNA-templated
SK1G00058417	25.674	11.1783	-1.1996	1.43987e-11	2.37278e-10	CRSH2	Metabolism;Metabolism	Global and overview maps;Nucleotide metabolism	K00951;K00951	EAY96652.1 hypothetical protein OsI_18566 [Oryza sativa Indica Group]	ko01100//Metabolic pathways;ko00230//Purine metabolism	-	GO:0003824//catalytic activity;GO:0005509//calcium ion binding	GO:0015968//stringent response;GO:0015969//guanosine tetraphosphate metabolic process
SK1G00046549	43.013	8.362	-2.36285	1.45574e-11	2.39757e-10	COBL7	-	-	-	EAY89661.1 hypothetical protein OsI_11192 [Oryza sativa Indica Group]	-	GO:0031225//anchored component of membrane	GO:0004553//hydrolase activity, hydrolyzing O-glycosyl compounds;GO:0030246//carbohydrate binding	GO:0005975//carbohydrate metabolic process;GO:0010215//cellulose microfibril organization
SK1G00070902	31.583	13.8533	-1.18892	1.46772e-11	2.41593e-10	--	-	-	-	-	-	-	-	-
MSTRG.3394	4.055	10.9317	1.43074	1.48038e-11	2.43539e-10	LRK10	-	-	-	rust resistance kinase Lr10 isoform X1 [Oryza sativa Japonica Group]	-	-	GO:0004672//protein kinase activity;GO:0005488//binding	GO:0044237//cellular metabolic process
SK1G00050486	9.727	21.632	1.1531	1.49361e-11	2.45158e-10	GN	Cellular Processes	Transport and catabolism	K18443	XP_015625789.1 ARF guanine-nucleotide exchange factor GNOM [Oryza sativa Japonica Group]	ko04144//Endocytosis	-	GO:0005085//guanyl-nucleotide exchange factor activity	GO:0032012//regulation of ARF protein signal transduction
SK1G00060335	5.512	1.595	-1.78902	1.50652e-11	2.46716e-10	--	-	-	-	KAB8100213.1 hypothetical protein EE612_030664 [Oryza sativa]	-	GO:0016020//membrane	-	-
SK1G00049254	7.59	3.247	-1.22499	1.61675e-11	2.63574e-10	EMB8	-	-	-	BAD25578.1 putative late embryonic abundant protein EMB8 [Oryza sativa Japonica Group]	-	-	GO:0003824//catalytic activity;GO:0047570//3-oxoadipate enol-lactonase activity;GO:0070205//2-succinyl-6-hydroxy-2,4-cyclohexadiene-1-carboxylate synthase activity	GO:0009102//biotin biosynthetic process;GO:0009234//menaquinone biosynthetic process;GO:0042952//beta-ketoadipate pathway
MSTRG.3308	0.964	3.583	1.89406	1.63103e-11	2.65753e-10	LRK10L-2.7	-	-	-	LEAF RUST 10 DISEASE-RESISTANCE LOCUS RECEPTOR-LIKE PROTEIN KINASE-like 2.1 [Oryza sativa Japonica Group]	-	-	GO:0016772//transferase activity, transferring phosphorus-containing groups	-
SK1G00063425	28.489	13.9357	-1.03162	1.63962e-11	2.66851e-10	Os07g0114000	-	-	-	XP_015645453.1 probable protein phosphatase 2C 61 isoform X1 [Oryza sativa Japonica Group]	-	-	GO:0016791//phosphatase activity	-
SK1G00049824	31.301	12.9297	-1.27552	1.64336e-11	2.6731e-10	RR2	Environmental Information Processing	Signal transduction	K14492	BAF09056.2 Os02g0557800, partial [Oryza sativa Japonica Group]	ko04075//Plant hormone signal transduction	GO:0016020//membrane	GO:0000156//phosphorelay response regulator activity;GO:0003677//DNA binding;GO:0003700//transcription factor activity, sequence-specific DNA binding;GO:0004673//protein histidine kinase activity;GO:0005524//ATP binding	GO:0000160//phosphorelay signal transduction system;GO:0006355//regulation of transcription, DNA-templated;GO:0006796//phosphate-containing compound metabolic process;GO:0006808//regulation of nitrogen utilization;GO:0030436//asexual sporulation;GO:0042173//regulation of sporulation resulting in formation of a cellular spore
SK1G00074466	12.479	3.62567	-1.78318	1.66984e-11	2.71312e-10	BAG1	-	-	-	EEC84905.1 hypothetical protein OsI_32096 [Oryza sativa Indica Group]	-	-	GO:0005515//protein binding;GO:0051087//chaperone binding	-
MSTRG.23964	0.38	1.967	2.37193	1.73363e-11	2.80113e-10	--	-	-	-	Os08g0314933, partial [Oryza sativa Japonica Group]	-	-	-	-
SK1G00070364	1.343	2.90767	1.1144	1.73369e-11	2.80113e-10	Os12g0580900	-	-	-	KAB8117985.1 hypothetical protein EE612_060513 [Oryza sativa]	-	GO:0005639//integral component of nuclear inner membrane;GO:0005737//cytoplasm	GO:0016791//phosphatase activity	GO:0006355//regulation of transcription, DNA-templated
SK1G00042728	18.412	4.694	-1.97176	1.74883e-11	2.82242e-10	--	-	-	-	BAS71566.1 Os01g0278000 [Oryza sativa Japonica Group]	-	-	GO:0004644//phosphoribosylglycinamide formyltransferase activity	GO:0009152//purine ribonucleotide biosynthetic process
SK1G00053323	0.03	1.58467	5.72307	1.7578e-11	2.83532e-10	--	-	-	-	EEC77259.1 hypothetical protein OsI_15861 [Oryza sativa Indica Group]	-	-	-	-
SK1G00068086	3.024	6.96433	1.20353	1.83407e-11	2.94684e-10	--	-	-	-	XP_015617425.1 uncharacterized protein LOC4349846 isoform X1 [Oryza sativa Japonica Group]	-	-	-	-
SK1G00062143	2.619	0.638333	-2.03663	1.85376e-11	2.97187e-10	CYP716B1	-	-	-	XP_015646095.1 cytochrome P450 716B1 [Oryza sativa Japonica Group]	-	-	GO:0005506//iron ion binding;GO:0016705//oxidoreductase activity, acting on paired donors, with incorporation or reduction of molecular oxygen;GO:0020037//heme binding	GO:0055114//oxidation-reduction process
SK1G00053366	10.835	3.42567	-1.66124	1.93137e-11	3.08569e-10	CSLH2	-	-	-	TVU14500.1 hypothetical protein EJB05_37974 [Eragrostis curvula]	-	GO:0016020//membrane;GO:0016021//integral component of membrane	GO:0016760//cellulose synthase (UDP-forming) activity;GO:0022857//transmembrane transporter activity	GO:0030244//cellulose biosynthetic process;GO:0055085//transmembrane transport
SK1G00072633	0.903	2.20167	1.2858	1.93222e-11	3.08569e-10	--	-	-	-	KAF2912579.1 hypothetical protein DAI22_10g022100 [Oryza sativa Japonica Group]	-	-	GO:0005515//protein binding	-
SK1G00052733	1.939	0.685333	-1.50044	1.93653e-11	3.09087e-10	UGT90A1	-	-	-	CAH66194.1 OSIGBa0144J05.6 [Oryza sativa]	-	-	GO:0008194//UDP-glycosyltransferase activity	-
SK1G00074863	109.378	32.2583	-1.76158	1.94451e-11	3.0991e-10	NHL1	-	-	-	OEL26447.1 hypothetical protein BAE44_0012534 [Dichanthelium oligosanthes]	-	-	-	-
SK1G00055351	0.58	4.33767	2.90279	1.94491e-11	3.0991e-10	--	-	-	-	XP_025882247.1 uncharacterized protein LOC4340124 [Oryza sativa Japonica Group]	-	GO:0005887//integral component of plasma membrane;GO:0043190//ATP-binding cassette (ABC) transporter complex	GO:0005524//ATP binding;GO:0042626//ATPase activity, coupled to transmembrane movement of substances	GO:0006810//transport
SK1G00045212	1.625	5.46	1.74846	1.9483e-11	3.10109e-10	OsI_12825	-	-	-	XP_015631498.1 probable E3 ubiquitin-protein ligase BAH1-like 1 isoform X1 [Oryza sativa Japonica Group]	-	GO:0000109//nucleotide-excision repair complex	GO:0008270//zinc ion binding;GO:0046872//metal ion binding	GO:0006289//nucleotide-excision repair
SK1G00074183	0.132	0.634	2.26394	2.07304e-11	3.29238e-10	AIR3	-	-	-	EEC84763.1 hypothetical protein OsI_31779 [Oryza sativa Indica Group]	-	GO:0005575//cellular_component	GO:0001727//lipid kinase activity;GO:0003872//6-phosphofructokinase activity;GO:0003951//NAD+ kinase activity;GO:0008236//serine-type peptidase activity;GO:0016301//kinase activity;GO:0016773//phosphotransferase activity, alcohol group as acceptor;GO:0047334//diphosphate-fructose-6-phosphate 1-phosphotransferase activity	GO:0006096//glycolytic process;GO:0006508//proteolysis;GO:0006741//NADP biosynthetic process;GO:0008150//biological_process;GO:0009306//protein secretion
SK1G00046743	61.729	22.813	-1.43609	2.24367e-11	3.55168e-10	Os03g0292100	-	-	-	EAY89586.1 hypothetical protein OsI_11115 [Oryza sativa Indica Group]	-	-	GO:0016791//phosphatase activity	-
SK1G00048730	10.516	3.45767	-1.60472	2.25391e-11	3.56593e-10	PUB10	-	-	-	EEC73944.1 hypothetical protein OsI_08816 [Oryza sativa Indica Group]	-	GO:0000109//nucleotide-excision repair complex;GO:0000221//vacuolar proton-transporting V-type ATPase, V1 domain	GO:0004674//protein serine/threonine kinase activity;GO:0004842//ubiquitin-protein transferase activity;GO:0005515//protein binding;GO:0008270//zinc ion binding;GO:0046961//proton-transporting ATPase activity, rotational mechanism	GO:0006289//nucleotide-excision repair;GO:0016567//protein ubiquitination;GO:1902600//hydrogen ion transmembrane transport
SK1G00074811	1.402	3.85633	1.45974	2.25945e-11	3.57275e-10	DOF5.8	-	-	-	CAE54550.1 OSJNBa0064G10.24 [Oryza sativa Japonica Group]	-	-	GO:0003677//DNA binding	GO:0006355//regulation of transcription, DNA-templated;GO:0010124//phenylacetate catabolic process
SK1G00074541	9.832	3.027	-1.6996	2.35352e-11	3.70826e-10	--	-	-	-	XP_015612146.1 uncharacterized protein At1g76070 [Oryza sativa Japonica Group]	-	-	-	-
SK1G00047720	0.05	0.303	2.59932	2.51452e-11	3.93519e-10	PATROL1	-	-	-	BAH91984.1 Os03g0138600 [Oryza sativa Japonica Group]	-	-	-	-
SK1G00052027	0.318	1.23067	1.95234	2.62568e-11	4.10029e-10	DRP4C	-	-	-	CAH65868.1 OSIGBa0103I21.1 [Oryza sativa]	-	GO:0005737//cytoplasm	GO:0003924//GTPase activity;GO:0005525//GTP binding;GO:0009973//adenylyl-sulfate reductase activity;GO:0043022//ribosome binding	GO:0010134//sulfate assimilation via adenylyl sulfate reduction;GO:0042254//ribosome biogenesis
SK1G00051506	0.736	2.015	1.453	2.64463e-11	4.12319e-10	--	-	-	-	EAZ21703.1 hypothetical protein OsJ_05335 [Oryza sativa Japonica Group]	-	-	-	-
SK1G00065562	0.562	1.216	1.1135	2.78477e-11	4.32072e-10	UBI11	-	-	-	EEC83007.1 hypothetical protein OsI_28061 [Oryza sativa Indica Group]	-	-	GO:0005515//protein binding	GO:0006289//nucleotide-excision repair
SK1G00040263	1.4	0.583667	-1.26221	2.81377e-11	4.36338e-10	At5g58300	-	-	-	XP_015625966.1 probable inactive receptor kinase At5g58300 [Oryza sativa Japonica Group]	-	-	GO:0004672//protein kinase activity;GO:0005515//protein binding;GO:0005524//ATP binding	GO:0006468//protein phosphorylation
SK1G00058104	65.63	30.6487	-1.09853	2.90422e-11	4.4892e-10	--	-	-	-	XP_015638213.1 protein PHOTOSYSTEM I ASSEMBLY 2, chloroplastic isoform X2 [Oryza sativa Japonica Group]	-	-	GO:0005515//protein binding;GO:0031072//heat shock protein binding;GO:0051082//unfolded protein binding	GO:0006313//transposition, DNA-mediated;GO:0006457//protein folding;GO:0009408//response to heat
SK1G00047923	10.713	4.76333	-1.16932	2.97996e-11	4.594e-10	PBL21	-	-	-	KAF0912267.1 hypothetical protein E2562_013950 [Oryza meyeriana var. granulata] [Oryza meyeriana]	-	-	GO:0004672//protein kinase activity;GO:0005524//ATP binding	GO:0006468//protein phosphorylation
SK1G00039958	100.035	23.622	-2.0823	3.02766e-11	4.65863e-10	--	-	-	-	ABY66166.1 DL119 protein [Oryza sativa Indica Group]	-	-	-	-
SK1G00057667	99.657	31.019	-1.68382	3.07015e-11	4.71295e-10	KRP1	-	-	-	EAZ02123.1 hypothetical protein OsI_24211 [Oryza sativa Indica Group]	-	-	GO:0005509//calcium ion binding;GO:0005515//protein binding	-
SK1G00041003	62.461	20.9227	-1.57789	3.18663e-11	4.88233e-10	MAPKKK17	-	-	-	XP_015689680.1 PREDICTED: serine/threonine-protein kinase TAO3-like [Oryza brachyantha]	-	-	GO:0004672//protein kinase activity;GO:0005524//ATP binding;GO:0016709//oxidoreductase activity, acting on paired donors, with incorporation or reduction of molecular oxygen, NAD(P)H as one donor, and incorporation of one atom of oxygen;GO:0045735//nutrient reservoir activity	GO:0006468//protein phosphorylation;GO:0006744//ubiquinone biosynthetic process;GO:0009405//pathogenesis
SK1G00070606	2.951	6.71767	1.18676	3.19313e-11	4.88876e-10	GATA4	-	-	-	XP_015618342.1 uncharacterized protein LOC4352838 [Oryza sativa Japonica Group]	-	-	GO:0008270//zinc ion binding;GO:0043565//sequence-specific DNA binding	GO:0006355//regulation of transcription, DNA-templated
SK1G00043912	8.374	18.366	1.13305	3.22668e-11	4.93228e-10	LARP1C	-	-	-	XP_015632256.1 la-related protein 1C isoform X1 [Oryza sativa Japonica Group]	-	-	-	-
MSTRG.21358	0.526	1.171	1.15461	3.31124e-11	5.04554e-10	--	-	-	-	hypothetical protein DAI22_07g273900 [Oryza sativa Japonica Group]	-	-	-	-
SK1G00069181	3.171	1.07167	-1.56508	3.32835e-11	5.06522e-10	ZHD3	-	-	-	XP_015618832.1 zinc-finger homeodomain protein 3 [Oryza sativa Japonica Group]	-	-	-	-
SK1G00059909	0.079	1.13067	3.83918	3.39036e-11	5.14983e-10	--	-	-	-	EEC79319.1 hypothetical protein OsI_20163 [Oryza sativa Indica Group]	-	-	-	-
SK1G00074476	61.782	14.0303	-2.13864	3.4374e-11	5.21243e-10	DREB1B	-	-	-	Q8GUW4.1 RecName: Full=Dehydration-responsive element-binding protein 1B; Short=Protein DREB1B [Oryza sativa Indica Group]	-	-	GO:0003700//transcription factor activity, sequence-specific DNA binding	GO:0006355//regulation of transcription, DNA-templated
MSTRG.10157	0.203	1.50233	2.88765	3.44782e-11	5.22338e-10	--	-	-	-	Os02g0616600, partial [Oryza sativa Japonica Group]	-	-	-	-
SK1G00044123	0.421	1.71333	2.02491	3.49055e-11	5.28277e-10	BHLH106	-	-	-	BAF13585.2 Os03g0811400 [Oryza sativa Japonica Group]	-	-	GO:0046983//protein dimerization activity	-
SK1G00057373	0.447	1.623	1.86032	3.49465e-11	5.28602e-10	LYK5	-	-	-	XP_015643312.1 protein LYK5 [Oryza sativa Japonica Group]	-	-	GO:0004672//protein kinase activity;GO:0005524//ATP binding	GO:0006468//protein phosphorylation
SK1G00046536	29.036	9.48833	-1.61362	3.53203e-11	5.3342e-10	TS2	-	-	-	XP_015628717.1 sex determination protein tasselseed-2 [Oryza sativa Japonica Group]	-	-	GO:0003824//catalytic activity;GO:0003854//3-beta-hydroxy-delta5-steroid dehydrogenase activity;GO:0003978//UDP-glucose 4-epimerase activity;GO:0004316//3-oxoacyl-[acyl-carrier-protein] reductase (NADPH) activity;GO:0004757//sepiapterin reductase activity;GO:0008460//dTDP-glucose 4,6-dehydratase activity;GO:0008667//2,3-dihydro-2,3-dihydroxybenzoate dehydrogenase activity;GO:0008678//2-deoxy-D-gl…	GO:0000272//polysaccharide catabolic process;GO:0006012//galactose metabolic process;GO:0006631//fatty acid metabolic process;GO:0006633//fatty acid biosynthetic process;GO:0006694//steroid biosynthetic process;GO:0006729//tetrahydrobiopterin biosynthetic process;GO:0008152//metabolic process;GO:0009243//O antigen biosynthetic process;GO:0015995//chlorophyll biosynthetic process;GO:0019305//dTDP-…
SK1G00049178	0.843	3.39267	2.00882	3.58494e-11	5.40564e-10	LPPB	-	-	-	XP_025878549.1 probable lipid phosphate phosphatase beta [Oryza sativa Japonica Group]	-	GO:0016020//membrane	GO:0005102//receptor binding;GO:0043548//phosphatidylinositol 3-kinase binding	GO:0014068//positive regulation of phosphatidylinositol 3-kinase signaling;GO:0050776//regulation of immune response
SK1G00039431	7.863	16.144	1.03785	3.7178e-11	5.58254e-10	--	-	-	-	EAY77192.1 hypothetical protein OsI_05161 [Oryza sativa Indica Group]	-	-	GO:0003677//DNA binding	GO:0006355//regulation of transcription, DNA-templated
SK1G00068889	16.379	46.5333	1.50642	3.71963e-11	5.58254e-10	PSK5	-	-	-	EAY82259.1 hypothetical protein OsI_37465 [Oryza sativa Indica Group]	-	GO:0005576//extracellular region	GO:0008083//growth factor activity	GO:0006915//apoptotic process;GO:0007050//cell cycle arrest;GO:0008283//cell proliferation;GO:0008285//negative regulation of cell proliferation
SK1G00049155	367.643	139.217	-1.40097	3.84032e-11	5.75769e-10	PIP1-1	-	-	-	XP_015625393.1 aquaporin PIP1-1 [Oryza sativa Japonica Group]	-	GO:0016020//membrane	GO:0015267//channel activity	GO:0055085//transmembrane transport
SK1G00068160	0.15	1.20633	3.00759	3.8548e-11	5.77342e-10	PCF3	-	-	-	BAB92951.1 transcription factor PCF3, partial [Oryza sativa Japonica Group]	-	-	-	-
SK1G00051496	13.798	4.425	-1.64071	3.91584e-11	5.85877e-10	Os11g0285000	-	-	-	BAS76917.1 Os02g0140500 [Oryza sativa Japonica Group]	-	-	-	-
SK1G00045903	24.087	50.452	1.06666	3.92873e-11	5.87198e-10	Os03g0429000	-	-	-	XP_015628386.1 cysteine proteinase inhibitor 8 [Oryza sativa Japonica Group]	-	-	GO:0004869//cysteine-type endopeptidase inhibitor activity	-
SK1G00047759	9.415	4.285	-1.13567	3.98205e-11	5.94172e-10	Os03g0144800	-	-	-	EEC74507.1 hypothetical protein OsI_09988 [Oryza sativa Indica Group]	-	-	-	-
MSTRG.1717	0.547	1.32833	1.28	3.98361e-11	5.94172e-10	--	Metabolism	Lipid metabolism	K06130	acyl-protein thioesterase 1 homolog 1 [Oryza sativa Japonica Group]	ko00564//Glycerophospholipid metabolism	-	GO:0016788//hydrolase activity, acting on ester bonds	-
SK1G00062421	13.011	3.04667	-2.09443	4.02782e-11	5.99838e-10	CDI	-	-	-	XP_015647733.1 protein CDI [Oryza sativa Japonica Group]	-	-	-	-
SK1G00068035	2.869	1.065	-1.42969	4.0862e-11	6.07282e-10	CSI3	-	-	-	EEC67806.1 hypothetical protein OsI_35372 [Oryza sativa Indica Group]	-	GO:0000221//vacuolar proton-transporting V-type ATPase, V1 domain	GO:0005515//protein binding;GO:0046961//proton-transporting ATPase activity, rotational mechanism	GO:1902600//hydrogen ion transmembrane transport
SK1G00067899	12.185	4.03933	-1.59292	4.1486e-11	6.15923e-10	--	-	-	-	-	-	-	-	-
SK1G00062278	17.942	4.734	-1.92221	4.17339e-11	6.19285e-10	ASMT3	-	-	-	EAZ03784.1 hypothetical protein OsI_25913 [Oryza sativa Indica Group]	-	-	GO:0008168//methyltransferase activity;GO:0008171//O-methyltransferase activity;GO:0043138//3'-5' DNA helicase activity;GO:0046983//protein dimerization activity	GO:0006260//DNA replication;GO:0006281//DNA repair;GO:0006480//N-terminal protein amino acid methylation;GO:0008299//isoprenoid biosynthetic process;GO:0009102//biotin biosynthetic process;GO:0016051//carbohydrate biosynthetic process
SK1G00062748	1.052	0.396	-1.40956	4.2773e-11	6.33729e-10	--	-	-	-	XP_015645918.2 uncharacterized protein LOC107275774 [Oryza sativa Japonica Group]	-	-	-	-
SK1G00057579	14.295	5.50867	-1.37574	4.46521e-11	6.60196e-10	CRYD	-	-	-	XP_015644118.1 cryptochrome DASH, chloroplastic/mitochondrial isoform X2 [Oryza sativa Japonica Group]	-	-	GO:0003904//deoxyribodipyrimidine photo-lyase activity	GO:0006281//DNA repair
SK1G00040209	103.287	42.2147	-1.29084	4.5234e-11	6.68137e-10	RER6	-	-	-	XP_025880804.1 uncharacterized protein LOC4327520 [Oryza sativa Japonica Group]	-	-	-	-
SK1G00068250	8.119	3.986	-1.02636	4.60707e-11	6.79108e-10	PAP22	-	-	-	KAF2909547.1 hypothetical protein DAI22_11g034600 [Oryza sativa Japonica Group]	-	-	GO:0003993//acid phosphatase activity;GO:0016787//hydrolase activity;GO:0046872//metal ion binding	-
SK1G00053972	7.38	3.305	-1.15897	4.61584e-11	6.80054e-10	PEX11-4	-	-	-	XP_015634264.1 peroxisomal membrane protein 11-4 [Oryza sativa Japonica Group]	-	GO:0005779//integral component of peroxisomal membrane	-	GO:0016559//peroxisome fission
SK1G00054553	4.15	9.19567	1.14784	4.62586e-11	6.81184e-10	FLS2	Organismal Systems;Environmental Information Processing	Environmental adaptation;Signal transduction	K13420;K13420	CAE02151.2 OSJNBa0058K23.7 [Oryza sativa Japonica Group]	ko04626//Plant-pathogen interaction;ko04016//MAPK signaling pathway - plant	-	GO:0004672//protein kinase activity;GO:0005515//protein binding;GO:0005524//ATP binding	GO:0006468//protein phosphorylation
SK1G00043370	13.308	27.081	1.02499	4.63879e-11	6.8274e-10	NFXL2	-	-	-	EEC69985.1 hypothetical protein OsI_00492 [Oryza sativa Indica Group]	-	GO:0005634//nucleus;GO:0016020//membrane	GO:0008270//zinc ion binding;GO:0016760//cellulose synthase (UDP-forming) activity	GO:0030244//cellulose biosynthetic process
SK1G00065307	1.437	0.596667	-1.26806	4.68377e-11	6.88659e-10	At5g57670	-	-	-	EEC83194.1 hypothetical protein OsI_28446 [Oryza sativa Indica Group]	-	-	GO:0004672//protein kinase activity;GO:0005524//ATP binding	GO:0006468//protein phosphorylation
SK1G00045738	11.341	25.711	1.18084	4.78347e-11	7.0118e-10	OST3	Metabolism;Genetic Information Processing;Metabolism;Metabolism	Global and overview maps;Folding, sorting and degradation;Glycan biosynthesis and metabolism;Glycan biosynthesis and metabolism	K12669;K12669;K12669;K12669	EEC75585.1 hypothetical protein OsI_12278 [Oryza sativa Indica Group]	ko01100//Metabolic pathways;ko04141//Protein processing in endoplasmic reticulum;ko00510//N-Glycan biosynthesis;ko00513//Various types of N-glycan biosynthesis	-	-	-
SK1G00046037	5.599	11.652	1.05734	5.03444e-11	7.36475e-10	ATL3	-	-	-	KAB8092110.1 hypothetical protein EE612_017911 [Oryza sativa]	-	GO:0000109//nucleotide-excision repair complex;GO:0005680//anaphase-promoting complex	GO:0008270//zinc ion binding;GO:0046872//metal ion binding;GO:0061630//ubiquitin protein ligase activity;GO:0097602//cullin family protein binding	GO:0006289//nucleotide-excision repair;GO:0031145//anaphase-promoting complex-dependent proteasomal ubiquitin-dependent protein catabolic process
MSTRG.14594	0.309	1.287	2.05833	5.09609e-11	7.43988e-10	RGA5	-	-	-	heavy metal-associated isoprenylated plant protein 16-like [Oryza sativa Japonica Group]	-	-	-	-
SK1G00053329	4.132	10.5853	1.35715	5.24336e-11	7.6241e-10	--	-	-	-	ABA97942.1 retrotransposon protein, putative, LINE subclass [Oryza sativa Japonica Group]	-	GO:0019028//viral capsid	GO:0004197//cysteine-type endopeptidase activity	GO:0043687//post-translational protein modification
SK1G00061384	8.563	22.5887	1.39941	5.41896e-11	7.86756e-10	Cacna2d3	-	-	-	EEC82439.1 hypothetical protein OsI_26857 [Oryza sativa Indica Group]	-	GO:0010007//magnesium chelatase complex	GO:0016851//magnesium chelatase activity;GO:0016887//ATPase activity	GO:0015995//chlorophyll biosynthetic process
SK1G00048852	1.346	3.99133	1.56819	5.55067e-11	8.04263e-10	PFP-ALPHA	Metabolism;Metabolism;Metabolism;Metabolism;Metabolism	Global and overview maps;Global and overview maps;Carbohydrate metabolism;Carbohydrate metabolism;Carbohydrate metabolism	K00895;K00895;K00895;K00895;K00895	AQK54727.1 Pyrophosphate--fructose 6-phosphate 1-phosphotransferase subunit alpha 2 [Zea mays]	ko01100//Metabolic pathways;ko01110//Biosynthesis of secondary metabolites;ko00010//Glycolysis / Gluconeogenesis;ko00051//Fructose and mannose metabolism;ko00030//Pentose phosphate pathway	-	GO:0003872//6-phosphofructokinase activity;GO:0016773//phosphotransferase activity, alcohol group as acceptor;GO:0047334//diphosphate-fructose-6-phosphate 1-phosphotransferase activity	GO:0006096//glycolytic process;GO:0006364//rRNA processing;GO:0006952//defense response
SK1G00071784	4.638	10.0733	1.11897	5.64923e-11	8.16499e-10	CDF1	-	-	-	EEC66917.1 hypothetical protein OsI_33516 [Oryza sativa Indica Group]	-	-	GO:0003677//DNA binding	GO:0006355//regulation of transcription, DNA-templated
SK1G00049524	18.656	43.5297	1.22236	5.73422e-11	8.27129e-10	NIC1	-	-	-	XP_015627422.1 nicotinamidase 1 [Oryza sativa Japonica Group]	-	-	-	-
SK1G00070238	12.262	25.0627	1.03135	6.47938e-11	9.25077e-10	HSP70	Genetic Information Processing;Genetic Information Processing;Cellular Processes	Folding, sorting and degradation;Transcription;Transport and catabolism	K03283;K03283;K03283	BAH95744.1 Os12g0569700, partial [Oryza sativa Japonica Group]	ko04141//Protein processing in endoplasmic reticulum;ko03040//Spliceosome;ko04144//Endocytosis	-	GO:0005515//protein binding;GO:0005524//ATP binding;GO:0016787//hydrolase activity;GO:0016887//ATPase activity;GO:0051082//unfolded protein binding	GO:0006457//protein folding;GO:0006950//response to stress;GO:0008360//regulation of cell shape
SK1G00057457	23.246	10.4923	-1.14765	6.49662e-11	9.26473e-10	--	-	-	-	EEC81078.1 hypothetical protein OsI_23898 [Oryza sativa Indica Group]	-	-	GO:0003700//transcription factor activity, sequence-specific DNA binding	GO:0006260//DNA replication;GO:0006355//regulation of transcription, DNA-templated
SK1G00042521	2.658	13.4447	2.33862	6.51712e-11	9.28938e-10	--	-	-	-	XP_025880854.1 sarcoplasmic reticulum histidine-rich calcium-binding protein [Oryza sativa Japonica Group]	-	-	-	GO:0006383//transcription from RNA polymerase III promoter
SK1G00046511	0.553	1.57667	1.51153	6.66204e-11	9.47585e-10	At5g58300	-	-	-	XP_015631741.1 probable inactive receptor kinase At5g58300 [Oryza sativa Japonica Group]	-	-	GO:0004672//protein kinase activity;GO:0005515//protein binding;GO:0005524//ATP binding	GO:0006468//protein phosphorylation
SK1G00073493	0.034	0.592667	4.12361	6.81146e-11	9.67556e-10	PAO6	Metabolism;Metabolism;Metabolism	Global and overview maps;Amino acid metabolism;Metabolism of other amino acids	K13366;K13366;K13366	XP_015611019.1 polyamine oxidase [Oryza sativa Japonica Group]	ko01100//Metabolic pathways;ko00330//Arginine and proline metabolism;ko00410//beta-Alanine metabolism	-	GO:0003824//catalytic activity;GO:0004729//oxygen-dependent protoporphyrinogen oxidase activity;GO:0008767//UDP-galactopyranose mutase activity;GO:0016166//phytoene dehydrogenase activity;GO:0016491//oxidoreductase activity;GO:0045550//geranylgeranyl reductase activity;GO:0050662//coenzyme binding	GO:0006779//porphyrin-containing compound biosynthetic process;GO:0009228//thiamine biosynthetic process;GO:0009273//peptidoglycan-based cell wall biogenesis;GO:0015995//chlorophyll biosynthetic process;GO:0016117//carotenoid biosynthetic process;GO:0030494//bacteriochlorophyll biosynthetic process;GO:0055114//oxidation-reduction process
SK1G00060471	101.628	44.109	-1.20415	6.92017e-11	9.82514e-10	--	-	-	-	XP_015637519.1 uncharacterized protein LOC4339469 [Oryza sativa Japonica Group]	-	-	-	-
MSTRG.11135	0.866	1.73767	1.00471	7.10838e-11	1.00825e-09	ACR7	-	-	-	ACT domain-containing protein ACR7 [Oryza sativa Japonica Group]	-	-	GO:0031406//carboxylic acid binding	GO:0001101//response to acid chemical
SK1G00063250	1.403	0.604333	-1.2151	7.1255e-11	1.01016e-09	--	Metabolism;Metabolism;Metabolism;Metabolism;Metabolism	Global and overview maps;Global and overview maps;Global and overview maps;Lipid metabolism;Lipid metabolism	K10258;K10258;K10258;K10258;K10258	EEC81557.1 hypothetical protein OsI_24991 [Oryza sativa Indica Group]	ko01100//Metabolic pathways;ko01110//Biosynthesis of secondary metabolites;ko01212//Fatty acid metabolism;ko00062//Fatty acid elongation;ko01040//Biosynthesis of unsaturated fatty acids	-	-	-
SK1G00049356	3.594	10.7167	1.57619	7.13235e-11	1.01016e-09	GA2OX6	Metabolism;Metabolism	Global and overview maps;Metabolism of terpenoids and polyketides	K04125;K04125	EEC73644.1 hypothetical protein OsI_08165 [Oryza sativa Indica Group]	ko01110//Biosynthesis of secondary metabolites;ko00904//Diterpenoid biosynthesis	-	GO:0016491//oxidoreductase activity	GO:0055114//oxidation-reduction process
SK1G00064431	1.568	3.522	1.16747	7.5349e-11	1.06146e-09	CSLA11	-	-	-	EEC83623.1 hypothetical protein OsI_29346 [Oryza sativa Indica Group]	-	-	GO:0008375//acetylglucosaminyltransferase activity	GO:0042710//biofilm formation
SK1G00039391	63.828	21.5253	-1.56815	7.68478e-11	1.07837e-09	--	-	-	-	XP_015612726.1 uncharacterized protein LOC4325751 [Oryza sativa Japonica Group]	-	-	-	-
SK1G00063564	1.433	0.648	-1.14497	7.82485e-11	1.09643e-09	LNG1	-	-	-	XP_015646820.1 protein LONGIFOLIA 1 isoform X1 [Oryza sativa Japonica Group]	-	-	-	-
SK1G00051034	2.163	0.415667	-2.37953	7.84273e-11	1.0984e-09	UGT73C6	Metabolism;Metabolism	Global and overview maps;Metabolism of terpenoids and polyketides	K13496;K13496	BAS77565.1 Os02g0207400 [Oryza sativa Japonica Group]	ko01110//Biosynthesis of secondary metabolites;ko00908//Zeatin biosynthesis	GO:0005576//extracellular region	GO:0008194//UDP-glycosyltransferase activity	GO:0042157//lipoprotein metabolic process
SK1G00043490	0.821	0.350667	-1.22728	7.84767e-11	1.09856e-09	ABCG31	-	-	-	XP_015625140.1 ABC transporter G family member 31 [Oryza sativa Japonica Group]	-	GO:0005575//cellular_component;GO:0005887//integral component of plasma membrane;GO:0009380//excinuclease repair complex;GO:0009898//cytoplasmic side of plasma membrane;GO:0016020//membrane;GO:0016021//integral component of membrane;GO:0043190//ATP-binding cassette (ABC) transporter complex;GO:0055051//ATP-binding cassette (ABC) transporter complex, integrated substrate binding;GO:0055052//ATP-bi…	GO:0003674//molecular_function;GO:0003678//DNA helicase activity;GO:0003924//GTPase activity;GO:0005260//channel-conductance-controlling ATPase activity;GO:0005319//lipid transporter activity;GO:0005524//ATP binding;GO:0005525//GTP binding;GO:0008565//protein transporter activity;GO:0009378//four-way junction helicase activity;GO:0009381//excinuclease ABC activity;GO:0015220//choline transmembran…	GO:0000910//cytokinesis;GO:0006260//DNA replication;GO:0006281//DNA repair;GO:0006289//nucleotide-excision repair;GO:0006310//DNA recombination;GO:0006810//transport;GO:0006817//phosphate ion transport;GO:0006824//cobalt ion transport;GO:0006869//lipid transport;GO:0007601//visual perception;GO:0008150//biological_process;GO:0008272//sulfate transport;GO:0015675//nickel cation transport;GO:001568…
SK1G00073120	148.209	65.614	-1.17556	7.98927e-11	1.11676e-09	CYP71D55	-	-	-	EAZ08397.1 hypothetical protein OsI_30658 [Oryza sativa Indica Group]	-	-	GO:0005506//iron ion binding;GO:0016705//oxidoreductase activity, acting on paired donors, with incorporation or reduction of molecular oxygen;GO:0020037//heme binding;GO:0031071//cysteine desulfurase activity	GO:0055114//oxidation-reduction process
SK1G00053731	2.946	6.16233	1.06472	8.18048e-11	1.14128e-09	--	-	-	-	KAB8095783.1 hypothetical protein EE612_023984 [Oryza sativa]	-	-	GO:0005515//protein binding	-
SK1G00061453	4.427	0.863667	-2.35778	8.24166e-11	1.14871e-09	PDCB2	-	-	-	KAB8106246.1 hypothetical protein EE612_040484 [Oryza sativa]	-	-	-	-
SK1G00070600	20.044	47.9303	1.25777	8.48294e-11	1.1778e-09	DHFS	Metabolism;Metabolism	Global and overview maps;Metabolism of cofactors and vitamins	K20457;K20457	ABA99426.2 dihydrofolate synthetase/folylpolyglutamate synthetase, putative, expressed [Oryza sativa Japonica Group]	ko01100//Metabolic pathways;ko00790//Folate biosynthesis	GO:0005737//cytoplasm	GO:0004326//tetrahydrofolylpolyglutamate synthase activity;GO:0005524//ATP binding;GO:0008763//UDP-N-acetylmuramate-L-alanine ligase activity;GO:0008764//UDP-N-acetylmuramoylalanine-D-glutamate ligase activity;GO:0008841//dihydrofolate synthase activity;GO:0016874//ligase activity;GO:0016881//acid-amino acid ligase activity;GO:0047480//UDP-N-acetylmuramoyl-tripeptide-D-alanyl-D-alanine ligase act…	GO:0006760//folic acid-containing compound metabolic process;GO:0009058//biosynthetic process;GO:0009252//peptidoglycan biosynthetic process;GO:0046654//tetrahydrofolate biosynthetic process;GO:0051235//maintenance of location;GO:0070501//poly-gamma-glutamate biosynthetic process
SK1G00060847	15.01	38.76	1.36864	8.55557e-11	1.18573e-09	--	-	-	-	XP_015639332.1 uncharacterized protein LOC4339814 [Oryza sativa Japonica Group]	-	-	GO:0005515//protein binding	-
SK1G00064524	3.755	11.654	1.63394	8.6038e-11	1.19115e-09	CPP1	-	-	-	XP_015648630.1 protein CHAPERONE-LIKE PROTEIN OF POR1, chloroplastic [Oryza sativa Japonica Group]	-	-	GO:0005515//protein binding	GO:0006457//protein folding;GO:0009408//response to heat
SK1G00045749	0.199	0.606	1.60655	8.68952e-11	1.20014e-09	RPPL1	-	-	-	AAK50583.1 putative resistance protein [Oryza sativa Japonica Group]	-	GO:0009368//endopeptidase Clp complex	GO:0004176//ATP-dependent peptidase activity;GO:0005515//protein binding;GO:0005524//ATP binding;GO:0043531//ADP binding	GO:0006508//proteolysis;GO:0043335//protein unfolding
SK1G00072936	14.537	6.581	-1.14335	8.84539e-11	1.21992e-09	--	-	-	-	EAZ08227.1 hypothetical protein OsI_30483 [Oryza sativa Indica Group]	-	GO:0000221//vacuolar proton-transporting V-type ATPase, V1 domain	GO:0005515//protein binding;GO:0046961//proton-transporting ATPase activity, rotational mechanism	GO:1902600//hydrogen ion transmembrane transport
SK1G00059685	65.716	30.0677	-1.12803	8.97203e-11	1.23444e-09	CXE17	-	-	-	EAY98033.1 hypothetical protein OsI_19949 [Oryza sativa Indica Group]	-	-	GO:0008236//serine-type peptidase activity;GO:0016787//hydrolase activity	GO:0006508//proteolysis
SK1G00071706	5.878	19.932	1.76169	9.11597e-11	1.25246e-09	ARD1	Metabolism;Metabolism	Global and overview maps;Amino acid metabolism	K08967;K08967	AAC05511.1 acireductone dioxygenase 1 [Oryza sativa]	ko01100//Metabolic pathways;ko00270//Cysteine and methionine metabolism	-	GO:0010309//acireductone dioxygenase [iron(II)-requiring] activity;GO:0047869//dimethylpropiothetin dethiomethylase activity	GO:0006355//regulation of transcription, DNA-templated;GO:0055114//oxidation-reduction process
SK1G00056801	0.489	1.33933	1.45361	9.17337e-11	1.25915e-09	ATL9	-	-	-	BAH93561.1 Os06g0534900 [Oryza sativa Japonica Group]	-	GO:0000109//nucleotide-excision repair complex;GO:0005680//anaphase-promoting complex	GO:0003723//RNA binding;GO:0008270//zinc ion binding;GO:0046872//metal ion binding;GO:0061630//ubiquitin protein ligase activity;GO:0097602//cullin family protein binding	GO:0006289//nucleotide-excision repair;GO:0031145//anaphase-promoting complex-dependent proteasomal ubiquitin-dependent protein catabolic process
SK1G00057195	0.095	0.437667	2.20383	9.35042e-11	1.28179e-09	XA21	-	-	-	KAF2927321.1 hypothetical protein DAI22_06g196100 [Oryza sativa Japonica Group]	-	-	GO:0004672//protein kinase activity;GO:0005515//protein binding;GO:0005524//ATP binding	GO:0006468//protein phosphorylation
SK1G00064586	0.954	0.473	-1.01215	9.56661e-11	1.30878e-09	BX6	-	-	-	XP_015648806.1 DIBOA-glucoside dioxygenase BX6 [Oryza sativa Japonica Group]	-	-	GO:0016491//oxidoreductase activity	GO:0055114//oxidation-reduction process
SK1G00045326	5.397	1.933	-1.48132	9.74287e-11	1.32975e-09	NET1A	-	-	-	XP_015631683.1 protein NETWORKED 1A [Oryza sativa Japonica Group]	-	-	GO:0003779//actin binding;GO:0005524//ATP binding	GO:0007059//chromosome segregation;GO:0030261//chromosome condensation
SK1G00065621	4.064	1.64267	-1.30686	9.90261e-11	1.35027e-09	abhd17c	-	-	-	XP_015648190.1 alpha/beta hydrolase domain-containing protein 17C [Oryza sativa Japonica Group]	-	-	GO:0003824//catalytic activity;GO:0008236//serine-type peptidase activity;GO:0016787//hydrolase activity;GO:0047570//3-oxoadipate enol-lactonase activity;GO:0070205//2-succinyl-6-hydroxy-2,4-cyclohexadiene-1-carboxylate synthase activity	GO:0006508//proteolysis;GO:0009102//biotin biosynthetic process;GO:0009234//menaquinone biosynthetic process;GO:0042952//beta-ketoadipate pathway
SK1G00070704	0.409	1.23267	1.59161	1.02571e-10	1.39204e-09	At5g35370	-	-	-	EAY84055.1 hypothetical protein OsI_39286 [Oryza sativa Indica Group]	-	-	GO:0003674//molecular_function;GO:0004672//protein kinase activity;GO:0005524//ATP binding	GO:0006468//protein phosphorylation;GO:0009306//protein secretion;GO:0048544//recognition of pollen
SK1G00056870	1.067	10.113	3.24458	1.02848e-10	1.3945e-09	PRX112	Metabolism;Metabolism;Metabolism	Global and overview maps;Global and overview maps;Biosynthesis of other secondary metabolites	K00430;K00430;K00430	EAZ01155.1 hypothetical protein OsI_23184 [Oryza sativa Indica Group]	ko01100//Metabolic pathways;ko01110//Biosynthesis of secondary metabolites;ko00940//Phenylpropanoid biosynthesis	-	GO:0004601//peroxidase activity;GO:0020037//heme binding	GO:0006979//response to oxidative stress;GO:0055114//oxidation-reduction process
SK1G00066453	4.745	10.7163	1.17533	1.06456e-10	1.44207e-09	GRDP2	-	-	-	EAY81694.1 hypothetical protein OsI_36870 [Oryza sativa Indica Group]	-	-	-	-
SK1G00041504	0.621	1.729	1.47727	1.06517e-10	1.44222e-09	OsI_14861	-	-	-	EAY74950.1 hypothetical protein OsI_02846 [Oryza sativa Indica Group]	-	-	GO:0008234//cysteine-type peptidase activity	GO:0006508//proteolysis
SK1G00060840	11.656	4.04133	-1.52817	1.09404e-10	1.47853e-09	--	-	-	-	XP_015640773.1 uncharacterized protein LOC4339807 [Oryza sativa Japonica Group]	-	-	-	-
SK1G00065698	3.782	1.05267	-1.8451	1.13174e-10	1.52608e-09	--	-	-	-	XP_015649453.1 uncharacterized protein LOC107278025 [Oryza sativa Japonica Group]	-	-	-	-
SK1G00071136	98.278	23.0827	-2.09006	1.19006e-10	1.59785e-09	RBL2	-	-	-	XP_015614650.1 RHOMBOID-like protein 2 [Oryza sativa Japonica Group]	-	GO:0005887//integral component of plasma membrane;GO:0016021//integral component of membrane	GO:0004252//serine-type endopeptidase activity	GO:0006464//cellular protein modification process;GO:0019538//protein metabolic process
SK1G00071164	10.708	33.1843	1.63181	1.19607e-10	1.60443e-09	GSTU6	Metabolism;Metabolism	Global and overview maps;Metabolism of other amino acids	K00799;K00799	EAY79285.1 hypothetical protein OsI_34411 [Oryza sativa Indica Group]	ko01100//Metabolic pathways;ko00480//Glutathione metabolism	-	GO:0005515//protein binding;GO:0016034//maleylacetoacetate isomerase activity	GO:0006559//L-phenylalanine catabolic process;GO:0006572//tyrosine catabolic process;GO:0006749//glutathione metabolic process
SK1G00072293	18.342	60.6703	1.72584	1.19964e-10	1.60848e-09	--	-	-	-	EAY77967.1 hypothetical protein OsI_33013 [Oryza sativa Indica Group]	-	-	-	-
SK1G00063265	1.818	0.776	-1.22822	1.20355e-10	1.61297e-09	HEN1	-	-	-	XP_015647880.1 small RNA 2'-O-methyltransferase [Oryza sativa Japonica Group]	-	-	GO:0008168//methyltransferase activity;GO:0008171//O-methyltransferase activity;GO:0008173//RNA methyltransferase activity;GO:0008689//3-demethylubiquinone-9 3-O-methyltransferase activity;GO:0008757//S-adenosylmethionine-dependent methyltransferase activity;GO:0030745//dimethylhistidine N-methyltransferase activity;GO:0046406//magnesium protoporphyrin IX methyltransferase activity	GO:0006412//translation;GO:0006744//ubiquinone biosynthetic process;GO:0008299//isoprenoid biosynthetic process;GO:0008610//lipid biosynthetic process;GO:0009086//methionine biosynthetic process;GO:0009102//biotin biosynthetic process;GO:0015995//chlorophyll biosynthetic process;GO:0016051//carbohydrate biosynthetic process;GO:0018364//peptidyl-glutamine methylation;GO:0042245//RNA repair;GO:0052…
SK1G00063241	6.59	1.68933	-1.96382	1.23092e-10	1.64431e-09	--	-	-	-	EAZ02852.1 hypothetical protein OsI_24982 [Oryza sativa Indica Group]	-	-	GO:0036361//racemase activity, acting on amino acids and derivatives	GO:0006807//nitrogen compound metabolic process
SK1G00054407	4.733	1.527	-1.63205	1.28704e-10	1.71216e-09	ERF025	-	-	-	EEC77827.1 hypothetical protein OsI_17041 [Oryza sativa Indica Group]	-	-	GO:0003700//transcription factor activity, sequence-specific DNA binding	GO:0006355//regulation of transcription, DNA-templated
SK1G00040019	123.287	55.0197	-1.164	1.28813e-10	1.71283e-09	HSPRO2	-	-	-	XP_015638006.1 nematode resistance protein-like HSPRO1 [Oryza sativa Japonica Group]	-	-	-	GO:0006952//defense response
SK1G00061241	4.778	12.104	1.34101	1.36894e-10	1.80781e-09	MYB94	-	-	-	ABS32247.1 putative MYB transcription factor [Oryza sativa Indica Group]	-	-	-	-
SK1G00068912	0.626	0.190333	-1.71763	1.42248e-10	1.87424e-09	GOS9	-	-	-	EAY82243.1 hypothetical protein OsI_37448 [Oryza sativa Indica Group]	-	-	-	-
SK1G00047173	17.396	35.9937	1.04899	1.4301e-10	1.88127e-09	GONST3	-	-	-	XP_015631951.1 GDP-mannose transporter GONST3 isoform X2 [Oryza sativa Japonica Group]	-	GO:0016021//integral component of membrane	-	-
SK1G00047380	2.649	0.798333	-1.73038	1.487e-10	1.94771e-09	HOX21	-	-	-	ABF94206.1 DNA-binding protein, putative, expressed [Oryza sativa Japonica Group]	-	-	GO:0003677//DNA binding;GO:0043565//sequence-specific DNA binding	GO:0006355//regulation of transcription, DNA-templated;GO:0006914//autophagy
SK1G00048531	0.461	2.76833	2.58618	1.50558e-10	1.97116e-09	Armc6	-	-	-	EAY87616.1 hypothetical protein OsI_09027 [Oryza sativa Indica Group]	-	-	GO:0005515//protein binding	-
SK1G00040574	3.649	9.294	1.3488	1.51146e-10	1.97528e-09	GH3.2	Environmental Information Processing	Signal transduction	K14487	ADN93114.1 indole-3-acetic acid-amido synthetase [Oryza sativa Indica Group]	ko04075//Plant hormone signal transduction	-	-	-
SK1G00041081	8.968	3.695	-1.27921	1.53256e-10	2.00195e-09	PSC	Metabolism;Metabolism	Global and overview maps;Carbohydrate metabolism	K01183;K01183	XP_015627500.1 acidic endochitinase [Oryza sativa Japonica Group]	ko01100//Metabolic pathways;ko00520//Amino sugar and nucleotide sugar metabolism	-	-	GO:0005975//carbohydrate metabolic process
SK1G00056301	2.277	0.850667	-1.42047	1.58165e-10	2.06328e-09	MAP65-1	-	-	-	EEC80473.1 hypothetical protein OsI_22696 [Oryza sativa Indica Group]	-	-	-	-
SK1G00063821	0.503	1.938	1.94594	1.59978e-10	2.08411e-09	GDPD1	Metabolism	Lipid metabolism	K18696	EAZ07788.1 hypothetical protein OsI_30040 [Oryza sativa Indica Group]	ko00564//Glycerophospholipid metabolism	-	GO:0008081//phosphoric diester hydrolase activity	GO:0006629//lipid metabolic process
SK1G00054039	2.588	5.702	1.13963	1.60587e-10	2.0911e-09	YSL11	-	-	-	TVU15141.1 hypothetical protein EJB05_38646, partial [Eragrostis curvula]	-	GO:0016020//membrane	GO:0003690//double-stranded DNA binding;GO:0015198//oligopeptide transporter activity	GO:0006857//oligopeptide transport;GO:0055085//transmembrane transport
SK1G00055314	0.035	0.851667	4.60486	1.63066e-10	2.11901e-09	--	-	-	-	TVU12710.1 hypothetical protein EJB05_46365 [Eragrostis curvula]	-	GO:0005743//mitochondrial inner membrane;GO:0030077//plasma membrane light-harvesting complex	GO:0045156//electron transporter, transferring electrons within the cyclic electron transport pathway of photosynthesis activity	GO:0019684//photosynthesis, light reaction;GO:0033617//mitochondrial respiratory chain complex IV assembly
SK1G00074889	17.414	6.572	-1.40584	1.71259e-10	2.22007e-09	--	-	-	-	CAJ86345.1 H0814G11.12 [Oryza sativa]	-	-	-	-
SK1G00041539	0.723	0.144667	-2.32126	1.72687e-10	2.23658e-09	At2g26730	-	-	-	EEC71058.1 hypothetical protein OsI_02797 [Oryza sativa Indica Group]	-	-	GO:0004672//protein kinase activity;GO:0005515//protein binding;GO:0005524//ATP binding	GO:0006468//protein phosphorylation
SK1G00071277	2.649	0.954333	-1.47288	1.77806e-10	2.29876e-09	--	-	-	-	XP_015614809.1 myosin-11 [Oryza sativa Japonica Group]	-	GO:0031514//motile cilium	GO:0005524//ATP binding	GO:0007059//chromosome segregation;GO:0030261//chromosome condensation;GO:0048870//cell motility
SK1G00069840	12.993	4.10833	-1.66111	1.85765e-10	2.39523e-09	AATP1	-	-	-	KAB8117463.1 hypothetical protein EE612_059512, partial [Oryza sativa]	-	GO:0000502//proteasome complex;GO:0009338//exodeoxyribonuclease V complex;GO:0009379//Holliday junction helicase complex	GO:0003723//RNA binding;GO:0003724//RNA helicase activity;GO:0004176//ATP-dependent peptidase activity;GO:0004222//metalloendopeptidase activity;GO:0004386//helicase activity;GO:0005524//ATP binding;GO:0005525//GTP binding;GO:0008854//exodeoxyribonuclease V activity;GO:0009378//four-way junction helicase activity;GO:0016818//hydrolase activity, acting on acid anhydrides, in phosphorus-containing …	GO:0002949//tRNA threonylcarbamoyladenosine modification;GO:0006281//DNA repair;GO:0006310//DNA recombination;GO:0006508//proteolysis;GO:0006614//SRP-dependent cotranslational protein targeting to membrane;GO:0009306//protein secretion;GO:0010498//proteasomal protein catabolic process;GO:0019079//viral genome replication;GO:0019941//modification-dependent protein catabolic process;GO:0032297//neg…
SK1G00067353	24.405	50.3083	1.04362	1.86007e-10	2.39728e-09	SEC23	Genetic Information Processing	Folding, sorting and degradation	K14006	XP_015617451.1 protein transport protein SEC23 [Oryza sativa Japonica Group]	ko04141//Protein processing in endoplasmic reticulum	GO:0030127//COPII vesicle coat	GO:0008270//zinc ion binding	GO:0006886//intracellular protein transport;GO:0006888//ER to Golgi vesicle-mediated transport
SK1G00054623	38.266	17.1263	-1.15985	1.89212e-10	2.43642e-09	STY13	-	-	-	XP_015636112.1 serine/threonine-protein kinase STY13 isoform X1 [Oryza sativa Japonica Group]	-	-	GO:0004672//protein kinase activity;GO:0005524//ATP binding;GO:0016709//oxidoreductase activity, acting on paired donors, with incorporation or reduction of molecular oxygen, NAD(P)H as one donor, and incorporation of one atom of oxygen	GO:0006468//protein phosphorylation;GO:0006744//ubiquinone biosynthetic process
SK1G00041596	3.79	1.807	-1.0686	1.89582e-10	2.44009e-09	--	-	-	-	EAY74814.1 hypothetical protein OsI_02706 [Oryza sativa Indica Group]	-	-	GO:0005515//protein binding	-
SK1G00050914	3.335	0.513333	-2.69972	1.93992e-10	2.49132e-09	--	-	-	-	EAY85218.1 hypothetical protein OsI_06588 [Oryza sativa Indica Group]	-	-	-	-
SK1G00040857	799.966	390.836	-1.03338	1.9511e-10	2.50345e-09	CAB2R	Metabolism;Metabolism	Global and overview maps;Energy metabolism	K08912;K08912	XP_015648289.1 chlorophyll a-b binding protein of LHCII type 1 [Oryza sativa Japonica Group]	ko01100//Metabolic pathways;ko00196//Photosynthesis - antenna proteins	-	-	-
SK1G00050966	0.005	0.438667	6.45505	2.02082e-10	2.58488e-09	ERL2	-	-	-	EAY85084.1 hypothetical protein OsI_06440 [Oryza sativa Indica Group]	-	-	GO:0004672//protein kinase activity;GO:0005515//protein binding;GO:0005524//ATP binding;GO:0009015//N-succinylarginine dihydrolase activity	GO:0006468//protein phosphorylation;GO:0006525//arginine metabolic process;GO:0006527//arginine catabolic process
SK1G00064745	2.018	0.872667	-1.20942	2.06629e-10	2.63837e-09	BX6	-	-	-	BAD05356.1 putative 2-oxoglutarate-dependent oxygenase [Oryza sativa Japonica Group]	-	-	GO:0016491//oxidoreductase activity	GO:0055114//oxidation-reduction process
SK1G00055241	0.138	0.681667	2.3044	2.07176e-10	2.64419e-09	At1g32860	-	-	-	XP_015643040.1 glucan endo-1,3-beta-glucosidase 14 [Oryza sativa Japonica Group]	-	-	GO:0004553//hydrolase activity, hydrolyzing O-glycosyl compounds	GO:0005975//carbohydrate metabolic process
SK1G00039820	2.997	0.552	-2.44078	2.08688e-10	2.6588e-09	ERF020	-	-	-	XP_015645971.1 ethylene-responsive transcription factor ERF015 [Oryza sativa Japonica Group]	-	-	GO:0003700//transcription factor activity, sequence-specific DNA binding	GO:0006355//regulation of transcription, DNA-templated
SK1G00053593	12.423	5.645	-1.13797	2.11074e-10	2.68682e-09	NAC079	-	-	-	XP_015633922.1 NAC domain-containing protein 92 [Oryza sativa Japonica Group]	-	-	GO:0003677//DNA binding	GO:0006355//regulation of transcription, DNA-templated
SK1G00040051	6.774	1.77733	-1.93029	2.32293e-10	2.93368e-09	At3g10130	-	-	-	EEC71815.1 hypothetical protein OsI_04454 [Oryza sativa Indica Group]	-	-	-	-
SK1G00046833	7.924	3.372	-1.23262	2.39195e-10	3.01427e-09	FEI1	-	-	-	XP_015631115.1 LRR receptor-like serine/threonine-protein kinase FEI 1 isoform X2 [Oryza sativa Japonica Group]	-	-	GO:0004672//protein kinase activity;GO:0005515//protein binding;GO:0005524//ATP binding	GO:0006468//protein phosphorylation
SK1G00048255	0.303	1.58767	2.38952	2.52005e-10	3.16467e-09	AVP1	-	-	-	XP_015626907.1 pyrophosphate-energized vacuolar membrane proton pump [Oryza sativa Japonica Group]	-	GO:0005887//integral component of plasma membrane;GO:0016020//membrane	GO:0004427//inorganic diphosphatase activity;GO:0009678//hydrogen-translocating pyrophosphatase activity	GO:0015992//proton transport;GO:1902600//hydrogen ion transmembrane transport
SK1G00056206	0.25	0.765667	1.61479	2.65779e-10	3.32321e-09	--	-	-	-	BAD54426.1 embryogenesis transmembrane protein-like [Oryza sativa Japonica Group]	-	GO:0005765//lysosomal membrane;GO:0016021//integral component of membrane	GO:0004564//beta-fructofuranosidase activity;GO:0004575//sucrose alpha-glucosidase activity;GO:0004930//G-protein coupled receptor activity;GO:0022857//transmembrane transporter activity	GO:0007186//G-protein coupled receptor signaling pathway;GO:0045444//fat cell differentiation;GO:0055085//transmembrane transport
SK1G00039448	35.08	70.4763	1.00649	2.68521e-10	3.35459e-09	VIT_06s0061g00120	-	-	-	EAY77172.1 hypothetical protein OsI_05142 [Oryza sativa Indica Group]	-	-	GO:0004553//hydrolase activity, hydrolyzing O-glycosyl compounds	GO:0005975//carbohydrate metabolic process
SK1G00047835	2.124	0.705333	-1.59041	2.79209e-10	3.4791e-09	--	-	-	-	XP_015628644.1 uncharacterized protein LOC4331430 isoform X2 [Oryza sativa Japonica Group]	-	-	-	-
SK1G00072708	0.867	0.237	-1.87114	2.82178e-10	3.51152e-09	pol	-	-	-	AAX95130.1 retrotransposon protein, putative, unclassified [Oryza sativa Japonica Group]	-	-	GO:0003964//RNA-directed DNA polymerase activity	GO:0000373//Group II intron splicing
SK1G00060067	41.838	17.8683	-1.22741	2.96571e-10	3.67801e-09	PUB16	-	-	-	XP_015637531.1 U-box domain-containing protein 16 [Oryza sativa Japonica Group]	-	-	GO:0004842//ubiquitin-protein transferase activity;GO:0005515//protein binding;GO:0008270//zinc ion binding	GO:0016567//protein ubiquitination
SK1G00048830	2.648	6.022	1.18534	2.98995e-10	3.70649e-09	Prelid3b	-	-	-	XP_015623054.1 PRELI domain containing protein 3B [Oryza sativa Japonica Group]	-	-	-	-
SK1G00043119	0.366	1.36667	1.90075	3.10353e-10	3.83577e-09	--	-	-	-	XP_015633710.1 uncharacterized protein LOC4324590 [Oryza sativa Japonica Group]	-	-	-	-
SK1G00064722	125.481	59.5497	-1.0753	3.32194e-10	4.08304e-09	WRKY53	-	-	-	XP_015651040.1 probable WRKY transcription factor 54 [Oryza sativa Japonica Group]	-	-	GO:0003700//transcription factor activity, sequence-specific DNA binding;GO:0043565//sequence-specific DNA binding	GO:0006355//regulation of transcription, DNA-templated
SK1G00061083	3.246	9.44633	1.54109	3.36254e-10	4.12417e-09	PNC1	Metabolism;Metabolism;Metabolism	Global and overview maps;Global and overview maps;Biosynthesis of other secondary metabolites	K00430;K00430;K00430	EAZ05138.1 hypothetical protein OsI_27331 [Oryza sativa Indica Group]	ko01100//Metabolic pathways;ko01110//Biosynthesis of secondary metabolites;ko00940//Phenylpropanoid biosynthesis	-	GO:0003674//molecular_function;GO:0004601//peroxidase activity;GO:0020037//heme binding	GO:0006979//response to oxidative stress;GO:0008150//biological_process;GO:0055114//oxidation-reduction process
SK1G00046219	1.254	0.422	-1.57122	3.36723e-10	4.12817e-09	At3g13620	-	-	-	KAB8091966.1 hypothetical protein EE612_017681 [Oryza sativa]	-	GO:0016020//membrane;GO:0016021//integral component of membrane	GO:0015171//amino acid transmembrane transporter activity;GO:0022857//transmembrane transporter activity	GO:0006865//amino acid transport;GO:0055085//transmembrane transport
SK1G00052794	0.641	2.477	1.9502	3.39946e-10	4.15799e-09	--	-	-	-	BAT01977.1 Os07g0542232, partial [Oryza sativa Japonica Group]	-	-	-	-
SK1G00074812	351.056	148.848	-1.23786	3.74807e-10	4.55262e-09	PORA	Metabolism;Metabolism;Metabolism	Global and overview maps;Global and overview maps;Metabolism of cofactors and vitamins	K00218;K00218;K00218	CAJ86241.1 H0402C08.17 [Oryza sativa]	ko01100//Metabolic pathways;ko01110//Biosynthesis of secondary metabolites;ko00860//Porphyrin and chlorophyll metabolism	-	GO:0004316//3-oxoacyl-[acyl-carrier-protein] reductase (NADPH) activity;GO:0004757//sepiapterin reductase activity;GO:0008667//2,3-dihydro-2,3-dihydroxybenzoate dehydrogenase activity;GO:0008678//2-deoxy-D-gluconate 3-dehydrogenase activity;GO:0016491//oxidoreductase activity;GO:0016630//protochlorophyllide reductase activity;GO:0050662//coenzyme binding;GO:0051287//NAD binding	GO:0000272//polysaccharide catabolic process;GO:0006633//fatty acid biosynthetic process;GO:0006729//tetrahydrobiopterin biosynthetic process;GO:0015995//chlorophyll biosynthetic process;GO:0055114//oxidation-reduction process
SK1G00061817	0.904	2.15667	1.25441	3.79862e-10	4.61209e-09	nep1	-	-	-	XP_015645827.1 aspartic proteinase nepenthesin-1 [Oryza sativa Japonica Group]	-	-	-	-
SK1G00074059	8.075	3.394	-1.25048	3.88227e-10	4.70377e-09	Os09g0459600	-	-	-	EAZ09387.1 hypothetical protein OsI_31661 [Oryza sativa Indica Group]	-	-	GO:0016791//phosphatase activity	-
SK1G00065523	8.461	2.82	-1.58513	4.17959e-10	5.03868e-09	--	-	-	-	BAT04301.1 Os08g0205800, partial [Oryza sativa Japonica Group]	-	GO:0030176//integral component of endoplasmic reticulum membrane	-	GO:2001256//regulation of store-operated calcium entry
MSTRG.15869	0.078	0.946333	3.6008	4.48093e-10	5.36616e-09	--	-	-	-	hypothetical protein DAI22_01g233400 [Oryza sativa Japonica Group]	-	-	-	-
SK1G00053495	113.189	40.6957	-1.47579	4.55414e-10	5.44258e-09	Os04g0447100	Metabolism;Metabolism;Metabolism;Metabolism	Global and overview maps;Global and overview maps;Lipid metabolism;Lipid metabolism	K00454;K00454;K00454;K00454	XP_015637182.1 putative lipoxygenase 5 [Oryza sativa Japonica Group]	ko01100//Metabolic pathways;ko01110//Biosynthesis of secondary metabolites;ko00592//alpha-Linolenic acid metabolism;ko00591//Linoleic acid metabolism	-	GO:0005515//protein binding;GO:0016702//oxidoreductase activity, acting on single donors with incorporation of molecular oxygen, incorporation of two atoms of oxygen;GO:0046872//metal ion binding	GO:0055114//oxidation-reduction process
SK1G00071142	1.992	0.94	-1.08348	4.68791e-10	5.5932e-09	--	-	-	-	EEC67332.1 hypothetical protein OsI_34367 [Oryza sativa Indica Group]	-	GO:0000221//vacuolar proton-transporting V-type ATPase, V1 domain	GO:0005515//protein binding;GO:0046961//proton-transporting ATPase activity, rotational mechanism	GO:1902600//hydrogen ion transmembrane transport
SK1G00073615	95.992	42.6743	-1.16955	4.88118e-10	5.8118e-09	ARB_01444	-	-	-	XP_015612312.1 probable endo-1,3(4)-beta-glucanase ARB_01444 [Oryza sativa Japonica Group]	-	-	-	-
SK1G00074555	274.944	653.222	1.24843	4.89738e-10	5.8263e-09	PIP2-7	-	-	-	XP_015651220.1 probable aquaporin PIP2-7 [Oryza sativa Japonica Group]	-	GO:0016020//membrane	GO:0015267//channel activity	GO:0055085//transmembrane transport
SK1G00063295	5.185	10.7833	1.05639	4.92835e-10	5.85351e-09	GSTU6	Metabolism;Metabolism	Global and overview maps;Metabolism of other amino acids	K00799;K00799	XP_015647678.1 probable glutathione S-transferase GSTU6 [Oryza sativa Japonica Group]	ko01100//Metabolic pathways;ko00480//Glutathione metabolism	-	GO:0005515//protein binding;GO:0016034//maleylacetoacetate isomerase activity	GO:0006559//L-phenylalanine catabolic process;GO:0006572//tyrosine catabolic process;GO:0006749//glutathione metabolic process
SK1G00064778	0.582	0.239667	-1.27999	4.99849e-10	5.9309e-09	RGA5	-	-	-	EAZ06783.1 hypothetical protein OsI_29029 [Oryza sativa Indica Group]	-	GO:0009379//Holliday junction helicase complex	GO:0003924//GTPase activity;GO:0004252//serine-type endopeptidase activity;GO:0005524//ATP binding;GO:0005525//GTP binding;GO:0009378//four-way junction helicase activity;GO:0016887//ATPase activity;GO:0017111//nucleoside-triphosphatase activity;GO:0043531//ADP binding	GO:0006281//DNA repair;GO:0006310//DNA recombination;GO:0006508//proteolysis
SK1G00065987	1.373	3.71167	1.43474	5.02261e-10	5.95567e-09	--	-	-	-	EEC82837.1 hypothetical protein OsI_27646 [Oryza sativa Indica Group]	-	GO:0019028//viral capsid	-	-
SK1G00071372	46.645	18.7027	-1.31848	5.04563e-10	5.98052e-09	LIS	Metabolism;Metabolism	Global and overview maps;Metabolism of terpenoids and polyketides	K15086;K15086	EAY79010.1 hypothetical protein OsI_34119 [Oryza sativa Indica Group]	ko01110//Biosynthesis of secondary metabolites;ko00902//Monoterpenoid biosynthesis	-	GO:0000287//magnesium ion binding;GO:0010333//terpene synthase activity;GO:0016829//lyase activity	-
SK1G00074968	0.194	1.249	2.68664	5.21382e-10	6.16724e-09	PCL1	-	-	-	AAS90600.1 induced protein MgI1 [Oryza sativa Japonica Group]	-	-	-	-
SK1G00056045	7.741	17.3153	1.16146	5.24599e-10	6.20021e-09	At1g66480	-	-	-	XP_015643941.1 uncharacterized protein At1g66480 [Oryza sativa Japonica Group]	-	-	-	-
SK1G00045822	33.036	11.9863	-1.46265	5.60135e-10	6.58255e-09	SRG1	-	-	-	EAY90597.1 hypothetical protein OsI_12197 [Oryza sativa Indica Group]	-	-	GO:0016491//oxidoreductase activity	GO:0055114//oxidation-reduction process
SK1G00056316	9.069	3.86433	-1.23072	5.68746e-10	6.6729e-09	At5g10770	-	-	-	XP_015644408.1 aspartyl protease family protein At5g10770 [Oryza sativa Japonica Group]	-	-	-	-
SK1G00062177	2.152	6.55533	1.60699	5.69296e-10	6.67664e-09	--	-	-	-	EEC78246.1 hypothetical protein OsI_17908 [Oryza sativa Indica Group]	-	-	-	-
SK1G00061380	18.843	9.267	-1.02385	5.86603e-10	6.86014e-09	SSL4	-	-	-	EAZ04693.1 hypothetical protein OsI_26851 [Oryza sativa Indica Group]	-	-	GO:0016844//strictosidine synthase activity	GO:0009058//biosynthetic process
SK1G00051650	182.331	76.863	-1.2462	6.0807e-10	7.09399e-09	--	-	-	-	ABR26063.1 unknown [Oryza sativa Indica Group]	-	-	GO:0003677//DNA binding;GO:0009036//Type II site-specific deoxyribonuclease activity	GO:0009307//DNA restriction-modification system
SK1G00042777	7.785	2.55933	-1.60493	6.22097e-10	7.24594e-09	PER24	Metabolism;Metabolism;Metabolism	Global and overview maps;Global and overview maps;Biosynthesis of other secondary metabolites	K00430;K00430;K00430	XP_015622358.1 peroxidase 24 [Oryza sativa Japonica Group]	ko01100//Metabolic pathways;ko01110//Biosynthesis of secondary metabolites;ko00940//Phenylpropanoid biosynthesis	-	GO:0004601//peroxidase activity;GO:0020037//heme binding	GO:0006979//response to oxidative stress;GO:0055114//oxidation-reduction process
SK1G00060462	3.456	9.17833	1.40913	6.41478e-10	7.45666e-09	RTE1	Environmental Information Processing	Signal transduction	K20726	XP_015640698.1 protein REVERSION-TO-ETHYLENE SENSITIVITY1 [Oryza sativa Japonica Group]	ko04016//MAPK signaling pathway - plant	-	GO:0050519//holo-citrate lyase synthase activity	GO:0051191//prosthetic group biosynthetic process
SK1G00073543	4.23	1.652	-1.35644	6.44096e-10	7.47808e-09	At1g51820	-	-	-	XP_015611349.1 probable LRR receptor-like serine/threonine-protein kinase At1g51810 [Oryza sativa Japonica Group]	-	-	GO:0004672//protein kinase activity;GO:0005515//protein binding;GO:0005524//ATP binding	GO:0006468//protein phosphorylation
SK1G00058503	1.723	3.51967	1.03052	6.52619e-10	7.57096e-09	--	-	-	-	AAT77345.1 unknown protein [Oryza sativa Japonica Group]	-	-	-	-
SK1G00067421	5.268	2.21067	-1.25277	6.65848e-10	7.70896e-09	ABCG28	-	-	-	XP_015615300.1 ABC transporter G family member 28 isoform X1 [Oryza sativa Japonica Group]	-	GO:0005575//cellular_component;GO:0005887//integral component of plasma membrane;GO:0009380//excinuclease repair complex;GO:0009898//cytoplasmic side of plasma membrane;GO:0016020//membrane;GO:0016021//integral component of membrane;GO:0043190//ATP-binding cassette (ABC) transporter complex;GO:0055051//ATP-binding cassette (ABC) transporter complex, integrated substrate binding;GO:0055052//ATP-bi…	GO:0003674//molecular_function;GO:0003924//GTPase activity;GO:0004527//exonuclease activity;GO:0005260//channel-conductance-controlling ATPase activity;GO:0005319//lipid transporter activity;GO:0005524//ATP binding;GO:0005525//GTP binding;GO:0008565//protein transporter activity;GO:0009381//excinuclease ABC activity;GO:0015220//choline transmembrane transporter activity;GO:0015221//lipopolysaccha…	GO:0000910//cytokinesis;GO:0002949//tRNA threonylcarbamoyladenosine modification;GO:0006260//DNA replication;GO:0006289//nucleotide-excision repair;GO:0006310//DNA recombination;GO:0006810//transport;GO:0006817//phosphate ion transport;GO:0006824//cobalt ion transport;GO:0006855//drug transmembrane transport;GO:0006869//lipid transport;GO:0007601//visual perception;GO:0008150//biological_process;…
SK1G00044795	31.08	13.7503	-1.17652	6.66152e-10	7.7094e-09	--	-	-	-	BAH92351.1 Os03g0723700, partial [Oryza sativa Japonica Group]	-	-	-	-
SK1G00042173	1.168	0.306667	-1.9293	6.74762e-10	7.79657e-09	SLAH3	-	-	-	XP_015632576.1 S-type anion channel SLAH2 [Oryza sativa Japonica Group]	-	GO:0016021//integral component of membrane	-	GO:0055085//transmembrane transport
SK1G00061081	18.902	56.3	1.5746	6.9604e-10	8.02639e-09	PRX112	Metabolism;Metabolism;Metabolism	Global and overview maps;Global and overview maps;Biosynthesis of other secondary metabolites	K00430;K00430;K00430	EEC82681.1 hypothetical protein OsI_27325 [Oryza sativa Indica Group]	ko01100//Metabolic pathways;ko01110//Biosynthesis of secondary metabolites;ko00940//Phenylpropanoid biosynthesis	-	GO:0004601//peroxidase activity;GO:0020037//heme binding	GO:0006979//response to oxidative stress;GO:0055114//oxidation-reduction process
SK1G00074408	40.029	18.5563	-1.10913	6.99656e-10	8.06166e-09	PBL19	-	-	-	XP_015611599.1 probable serine/threonine-protein kinase PBL19 [Oryza sativa Japonica Group]	-	-	GO:0004672//protein kinase activity;GO:0005524//ATP binding	GO:0006468//protein phosphorylation
SK1G00072640	6.771	1.80133	-1.9103	7.01258e-10	8.07689e-09	CYP76T24	-	-	-	KAB8112060.1 hypothetical protein EE612_050019 [Oryza sativa]	-	-	GO:0005506//iron ion binding;GO:0016705//oxidoreductase activity, acting on paired donors, with incorporation or reduction of molecular oxygen;GO:0020037//heme binding	GO:0055114//oxidation-reduction process
SK1G00043678	22.364	10.8867	-1.03862	7.27635e-10	8.35076e-09	CRK41	-	-	-	EEE53798.1 hypothetical protein OsJ_00223 [Oryza sativa Japonica Group]	-	-	GO:0004672//protein kinase activity;GO:0005524//ATP binding	GO:0006468//protein phosphorylation
SK1G00047339	6.12	2.93667	-1.05935	7.30766e-10	8.37673e-09	CYCD5-3	-	-	-	EEC74713.1 hypothetical protein OsI_10433 [Oryza sativa Indica Group]	-	-	-	-
SK1G00040414	5.721	1.492	-1.93902	7.40999e-10	8.48394e-09	--	-	-	-	XP_015633594.1 uncharacterized protein LOC4324133 [Oryza sativa Japonica Group]	-	-	-	-
SK1G00044084	10.544	22.497	1.09331	7.68591e-10	8.78247e-09	COG2	-	-	-	EEC76534.1 hypothetical protein OsI_14326 [Oryza sativa Indica Group]	-	-	-	-
SK1G00046215	21.341	8.296	-1.36314	7.76539e-10	8.86278e-09	--	-	-	-	EEC75346.1 hypothetical protein OsI_11770 [Oryza sativa Indica Group]	-	GO:0016020//membrane;GO:0019033//viral tegument	-	-
MSTRG.6111	0.086	1.083	3.65455	8.02737e-10	9.14374e-09	--	-	-	-	Os07g0267200, partial [Oryza sativa Japonica Group]	-	-	-	-
SK1G00040640	1.649	4.165	1.33673	8.10444e-10	9.21339e-09	ATL40	-	-	-	XP_015630308.1 RING-H2 finger protein ATL39 [Oryza sativa Japonica Group]	-	GO:0000109//nucleotide-excision repair complex;GO:0005680//anaphase-promoting complex	GO:0008270//zinc ion binding;GO:0046872//metal ion binding;GO:0061630//ubiquitin protein ligase activity;GO:0097602//cullin family protein binding	GO:0006289//nucleotide-excision repair;GO:0031145//anaphase-promoting complex-dependent proteasomal ubiquitin-dependent protein catabolic process
MSTRG.6646	0.607	1.552	1.35436	8.43049e-10	9.55026e-09	--	-	-	-	Os07g0137500, partial [Oryza sativa Japonica Group]	-	GO:0043231//intracellular membrane-bounded organelle	-	GO:0006259//DNA metabolic process
SK1G00051753	11.686	5.29	-1.14344	8.44283e-10	9.5605e-09	EXL3	-	-	-	XP_015625169.1 GDSL esterase/lipase EXL3 [Oryza sativa Japonica Group]	-	-	GO:0016788//hydrolase activity, acting on ester bonds	-
SK1G00039939	3.059	6.934	1.18063	8.62197e-10	9.74428e-09	BZIP12	Environmental Information Processing	Signal transduction	K14432	XP_015612904.1 bZIP transcription factor 12-like [Oryza sativa Japonica Group]	ko04075//Plant hormone signal transduction	-	GO:0003677//DNA binding;GO:0003700//transcription factor activity, sequence-specific DNA binding;GO:0003924//GTPase activity;GO:0005525//GTP binding;GO:0008855//exodeoxyribonuclease VII activity	GO:0006355//regulation of transcription, DNA-templated
SK1G00053237	0.606	0.117333	-2.3687	9.04519e-10	1.01907e-08	--	-	-	-	XP_015634179.1 serine/arginine repetitive matrix protein 2 [Oryza sativa Japonica Group]	-	-	-	-
SK1G00047745	8.909	19.03	1.09494	9.13423e-10	1.0279e-08	ABCC13	Environmental Information Processing	Membrane transport	K05665	XP_015630971.1 ABC transporter C family member 13 [Oryza sativa Japonica Group]	ko02010//ABC transporters	GO:0005575//cellular_component;GO:0005737//cytoplasm;GO:0005887//integral component of plasma membrane;GO:0009380//excinuclease repair complex;GO:0009898//cytoplasmic side of plasma membrane;GO:0016021//integral component of membrane;GO:0030257//type III protein secretion system complex;GO:0043190//ATP-binding cassette (ABC) transporter complex;GO:0055051//ATP-binding cassette (ABC) transporter c…	GO:0000166//nucleotide binding;GO:0003676//nucleic acid binding;GO:0003677//DNA binding;GO:0003924//GTPase activity;GO:0004140//dephospho-CoA kinase activity;GO:0005260//channel-conductance-controlling ATPase activity;GO:0005319//lipid transporter activity;GO:0005524//ATP binding;GO:0005525//GTP binding;GO:0008565//protein transporter activity;GO:0009381//excinuclease ABC activity;GO:0015220//cho…	GO:0000910//cytokinesis;GO:0006289//nucleotide-excision repair;GO:0006810//transport;GO:0006817//phosphate ion transport;GO:0006824//cobalt ion transport;GO:0006855//drug transmembrane transport;GO:0006869//lipid transport;GO:0007601//visual perception;GO:0008150//biological_process;GO:0008272//sulfate transport;GO:0009405//pathogenesis;GO:0015675//nickel cation transport;GO:0015689//molybdate io…
SK1G00054126	7.94	2.7	-1.55618	9.1951e-10	1.03435e-08	--	-	-	-	PUZ48314.1 hypothetical protein GQ55_7G236000 [Panicum hallii var. hallii] [Panicum hallii]	-	-	GO:0005198//structural molecule activity	-
SK1G00049589	16.923	7.168	-1.23934	9.5965e-10	1.07699e-08	RGA1	-	-	-	KAF2945654.1 hypothetical protein DAI22_02g232400 [Oryza sativa Japonica Group]	-	-	GO:0043531//ADP binding	-
SK1G00051006	4.372	1.436	-1.60624	9.61032e-10	1.07812e-08	NIP1-1	-	-	-	XP_015623151.1 aquaporin NIP1-1 [Oryza sativa Japonica Group]	-	GO:0016020//membrane	GO:0015267//channel activity	GO:0055085//transmembrane transport
SK1G00052644	33.731	68.5503	1.02309	9.95418e-10	1.11411e-08	WAK5	-	-	-	KAF2933189.1 hypothetical protein DAI22_04g063400 [Oryza sativa Japonica Group]	-	-	GO:0003674//molecular_function;GO:0004672//protein kinase activity;GO:0005509//calcium ion binding;GO:0005524//ATP binding;GO:0030247//polysaccharide binding	GO:0006468//protein phosphorylation;GO:0030436//asexual sporulation
SK1G00066850	0.349	1.028	1.55854	1.00505e-09	1.12402e-08	WAKL4	-	-	-	XP_025877407.1 wall-associated receptor kinase-like 22 [Oryza sativa Japonica Group]	-	-	GO:0004672//protein kinase activity;GO:0005524//ATP binding	GO:0006468//protein phosphorylation
SK1G00066397	12.578	5.95933	-1.07768	1.01885e-09	1.13857e-08	--	-	-	-	EEC79988.1 hypothetical protein OsI_21631 [Oryza sativa Indica Group]	-	-	GO:0005524//ATP binding	GO:0007059//chromosome segregation;GO:0030261//chromosome condensation
SK1G00070892	0.694	0.326	-1.09006	1.04436e-09	1.16618e-08	REL2	-	-	-	EAY79532.1 hypothetical protein OsI_34661 [Oryza sativa Indica Group]	-	-	GO:0003899//DNA-directed RNA polymerase activity	-
SK1G00074148	0.057	0.716	3.65093	1.06124e-09	1.18457e-08	UBQ3	-	-	-	XP_025875918.1 uncharacterized protein LOC4347411 [Oryza sativa Japonica Group]	-	GO:0005840//ribosome	GO:0003735//structural constituent of ribosome;GO:0005509//calcium ion binding;GO:0005515//protein binding	GO:0003352//regulation of cilium movement;GO:0006289//nucleotide-excision repair;GO:0006351//transcription, DNA-templated;GO:0006412//translation
SK1G00041637	27.319	13.023	-1.06884	1.10175e-09	1.226e-08	ALDH2C4	Metabolism	Biosynthesis of other secondary metabolites	K12355	XP_015618943.1 aldehyde dehydrogenase family 2 member C4 [Oryza sativa Japonica Group]	ko00940//Phenylpropanoid biosynthesis	-	GO:0003842//1-pyrroline-5-carboxylate dehydrogenase activity;GO:0004350//glutamate-5-semialdehyde dehydrogenase activity;GO:0004491//methylmalonate-semialdehyde dehydrogenase (acylating) activity;GO:0004777//succinate-semialdehyde dehydrogenase (NAD+) activity;GO:0008802//betaine-aldehyde dehydrogenase activity;GO:0009013//succinate-semialdehyde dehydrogenase [NAD(P)+] activity;GO:0016491//oxidor…	GO:0006527//arginine catabolic process;GO:0006561//proline biosynthetic process;GO:0006562//proline catabolic process;GO:0006574//valine catabolic process;GO:0006578//amino-acid betaine biosynthetic process;GO:0009450//gamma-aminobutyric acid catabolic process;GO:0055114//oxidation-reduction process
SK1G00060428	6.701	3.27233	-1.03406	1.11378e-09	1.23843e-08	CBL4	-	-	-	XP_015637956.1 calcineurin B-like protein 4 isoform X2 [Oryza sativa Japonica Group]	-	-	GO:0005509//calcium ion binding;GO:0005515//protein binding;GO:0008879//glucose-1-phosphate thymidylyltransferase activity	GO:0009243//O antigen biosynthetic process;GO:0019305//dTDP-rhamnose biosynthetic process
SK1G00063019	0.368	1.24467	1.75798	1.16552e-09	1.29248e-08	P4H7	Metabolism;Metabolism	Global and overview maps;Amino acid metabolism	K00472;K00472	EEC81680.1 hypothetical protein OsI_25242 [Oryza sativa Indica Group]	ko01100//Metabolic pathways;ko00330//Arginine and proline metabolism	-	GO:0016491//oxidoreductase activity	GO:0055114//oxidation-reduction process
SK1G00066327	0.153	0.575667	1.9117	1.19152e-09	1.31817e-08	CBP60E	-	-	-	XP_015615412.1 calmodulin-binding protein 60 B isoform X1 [Oryza sativa Japonica Group]	-	GO:0005747//mitochondrial respiratory chain complex I	GO:0005516//calmodulin binding	GO:0006120//mitochondrial electron transport, NADH to ubiquinone
SK1G00072719	4.956	13.6337	1.45993	1.19566e-09	1.32101e-08	At5g38386	-	-	-	XP_015613506.1 uncharacterized protein LOC4348029 [Oryza sativa Japonica Group]	-	-	GO:0005515//protein binding	GO:0006355//regulation of transcription, DNA-templated;GO:0019058//viral life cycle
SK1G00054823	13.466	31.0107	1.20344	1.21826e-09	1.34325e-08	PGDH1	Metabolism;Metabolism;Metabolism;Metabolism;Metabolism;Metabolism	Global and overview maps;Global and overview maps;Global and overview maps;Global and overview maps;Amino acid metabolism;Amino acid metabolism	K00058;K00058;K00058;K00058;K00058;K00058	CAH68268.1 H0212B02.14 [Oryza sativa]	ko01100//Metabolic pathways;ko01110//Biosynthesis of secondary metabolites;ko01200//Carbon metabolism;ko01230//Biosynthesis of amino acids;ko00270//Cysteine and methionine metabolism;ko00260//Glycine, serine and threonine metabolism	-	GO:0003824//catalytic activity;GO:0003941//L-serine ammonia-lyase activity;GO:0004013//adenosylhomocysteinase activity;GO:0004455//ketol-acid reductoisomerase activity;GO:0004617//phosphoglycerate dehydrogenase activity;GO:0004644//phosphoribosylglycinamide formyltransferase activity;GO:0016616//oxidoreductase activity, acting on the CH-OH group of donors, NAD or NADP as acceptor;GO:0050661//NADP…	GO:0006094//gluconeogenesis;GO:0006564//L-serine biosynthetic process;GO:0006565//L-serine catabolic process;GO:0006730//one-carbon metabolic process;GO:0009097//isoleucine biosynthetic process;GO:0009099//valine biosynthetic process;GO:0009152//purine ribonucleotide biosynthetic process;GO:0030436//asexual sporulation;GO:0055114//oxidation-reduction process
SK1G00048743	0.977	0.344333	-1.50455	1.24752e-09	1.37132e-08	ALMT9	-	-	-	XP_015625620.1 aluminum-activated malate transporter 9 [Oryza sativa Japonica Group]	-	GO:0005886//plasma membrane	GO:0022857//transmembrane transporter activity	GO:0015743//malate transport;GO:0055085//transmembrane transport
SK1G00044417	85.41	28.6347	-1.57664	1.25444e-09	1.37841e-08	--	-	-	-	EAY92004.1 hypothetical protein OsI_13693 [Oryza sativa Indica Group]	-	-	-	-
SK1G00055039	28.578	8.95333	-1.67441	1.25917e-09	1.38203e-08	CYP93G2	-	-	-	EAY99299.1 hypothetical protein OsI_21265 [Oryza sativa Indica Group]	-	-	GO:0005506//iron ion binding;GO:0016705//oxidoreductase activity, acting on paired donors, with incorporation or reduction of molecular oxygen;GO:0020037//heme binding	GO:0055114//oxidation-reduction process
SK1G00056689	0.375	1.32267	1.81849	1.30535e-09	1.42622e-08	OsI_28174	Metabolism;Metabolism;Metabolism;Metabolism	Global and overview maps;Global and overview maps;Lipid metabolism;Lipid metabolism	K03921;K03921;K03921;K03921	KAB8102335.1 hypothetical protein EE612_033807, partial [Oryza sativa]	ko01100//Metabolic pathways;ko01212//Fatty acid metabolism;ko00061//Fatty acid biosynthesis;ko01040//Biosynthesis of unsaturated fatty acids	-	GO:0045300//acyl-[acyl-carrier-protein] desaturase activity	GO:0006631//fatty acid metabolic process;GO:0055114//oxidation-reduction process
SK1G00071397	0.89	4.40433	2.30705	1.31215e-09	1.43202e-08	G1L5	-	-	-	XP_015613424.1 protein G1-like5 [Oryza sativa Japonica Group]	-	-	-	-
SK1G00044577	6.152	2.83867	-1.11584	1.32123e-09	1.43924e-08	UGT83A1	-	-	-	XP_020200176.1 uncharacterized protein LOC109785999 [Aegilops tauschii subsp. tauschii] [Aegilops tauschii]	-	-	GO:0008194//UDP-glycosyltransferase activity;GO:0016758//transferase activity, transferring hexosyl groups;GO:0031419//cobalamin binding;GO:0046872//metal ion binding	GO:0005975//carbohydrate metabolic process;GO:0030259//lipid glycosylation
SK1G00040499	1.318	4.31867	1.71224	1.32997e-09	1.44819e-08	Wdr44	-	-	-	EEC71572.1 hypothetical protein OsI_03943 [Oryza sativa Indica Group]	-	-	GO:0005515//protein binding	-
SK1G00063717	5.359	2.00833	-1.41597	1.37145e-09	1.4872e-08	BAG1	-	-	-	BAF24333.2 Os08g0546100 [Oryza sativa Japonica Group]	-	-	GO:0005515//protein binding;GO:0051087//chaperone binding	-
SK1G00068152	20.089	41.5633	1.04891	1.39957e-09	1.5126e-08	Os11g0174000	-	-	-	KAB8114405.1 hypothetical protein EE612_053800 [Oryza sativa]	-	GO:0005634//nucleus;GO:0030117//membrane coat;GO:0030126//COPI vesicle coat	GO:0003677//DNA binding;GO:0005198//structural molecule activity;GO:0005515//protein binding	GO:0006310//DNA recombination;GO:0006886//intracellular protein transport;GO:0016192//vesicle-mediated transport
SK1G00061556	2.824	0.357333	-2.9824	1.4188e-09	1.53109e-08	--	-	-	-	XP_015645764.1 leucine-rich repeat protein soc-2 homolog [Oryza sativa Japonica Group]	-	-	-	-
MSTRG.871	0.111	0.740667	2.73826	1.48915e-09	1.60402e-08	--	-	-	-	OSJNBb0054B09.15 [Oryza sativa Japonica Group]	-	-	GO:0003676//nucleic acid binding;GO:0005515//protein binding;GO:0017111//nucleoside-triphosphatase activity;GO:0032550//purine ribonucleoside binding	-
SK1G00047453	8.663	23.5913	1.44532	1.50739e-09	1.62124e-08	EREBP1	-	-	-	CAC83122.1 ethylene responsive protein [Oryza sativa]	-	GO:0005634//nucleus	GO:0003700//transcription factor activity, sequence-specific DNA binding	GO:0006338//chromatin remodeling;GO:0006355//regulation of transcription, DNA-templated;GO:0043486//histone exchange
SK1G00069424	1.514	3.22733	1.09198	1.51707e-09	1.63026e-08	RGA4	-	-	-	KAB8117206.1 hypothetical protein EE612_058921 [Oryza sativa]	-	GO:0005737//cytoplasm	GO:0003677//DNA binding;GO:0003697//single-stranded DNA binding;GO:0005524//ATP binding;GO:0008094//DNA-dependent ATPase activity;GO:0016887//ATPase activity;GO:0043531//ADP binding	GO:0006281//DNA repair;GO:0006310//DNA recombination;GO:0009432//SOS response
SK1G00052453	0.097	0.691667	2.83402	1.52758e-09	1.6393e-08	--	-	-	-	AAL86492.1 putative polyprotein [Oryza sativa Japonica Group]	-	-	GO:0003676//nucleic acid binding;GO:0004190//aspartic-type endopeptidase activity;GO:0008270//zinc ion binding	GO:0006508//proteolysis;GO:0008150//biological_process
SK1G00045251	2.638	5.41767	1.03823	1.54773e-09	1.65723e-08	At1g64760	-	-	-	XP_015631362.1 glucan endo-1,3-beta-glucosidase 8 [Oryza sativa Japonica Group]	-	-	GO:0004553//hydrolase activity, hydrolyzing O-glycosyl compounds	GO:0005975//carbohydrate metabolic process
MSTRG.18498	2.864	1.02867	-1.47726	1.79012e-09	1.89711e-08	--	-	-	-	hypothetical protein [Oryza sativa Japonica Group]	-	-	-	-
SK1G00048089	12.079	24.1667	1.00052	1.80657e-09	1.91034e-08	--	-	-	-	EAY88091.1 hypothetical protein OsI_09523 [Oryza sativa Indica Group]	-	-	-	-
SK1G00044378	0.534	2.59867	2.28286	1.82963e-09	1.93301e-08	--	-	-	-	XP_015628577.1 uncharacterized protein LOC9270425 [Oryza sativa Japonica Group]	-	-	-	-
SK1G00055056	1.303	0.463	-1.49275	1.85314e-09	1.95601e-08	SKU5	-	-	-	XP_015641204.1 monocopper oxidase-like protein SKU5 [Oryza sativa Japonica Group]	-	-	GO:0005375//copper ion transmembrane transporter activity;GO:0005507//copper ion binding;GO:0016491//oxidoreductase activity;GO:0016798//hydrolase activity, acting on glycosyl bonds	GO:0006825//copper ion transport;GO:0055114//oxidation-reduction process
SK1G00070919	0.65	1.428	1.13548	1.92147e-09	2.02297e-08	GIP	-	-	-	AAL79695.1 putative gag-pol polyprotein [Oryza sativa Japonica Group]	-	-	GO:0003674//molecular_function;GO:0003676//nucleic acid binding;GO:0008270//zinc ion binding	GO:0009306//protein secretion;GO:0015074//DNA integration
SK1G00051080	0.458	1.32967	1.53765	1.92602e-09	2.02702e-08	HDAC3	-	-	-	EEC72745.1 hypothetical protein OsI_06369 [Oryza sativa Indica Group]	-	-	-	-
SK1G00047985	13.221	5.42233	-1.28585	1.936e-09	2.03678e-08	EL2	-	-	-	EEC74356.1 hypothetical protein OsI_09665 [Oryza sativa Indica Group]	-	-	-	-
SK1G00055068	1.516	0.371	-2.03078	1.94698e-09	2.04758e-08	At5g47470	-	-	-	XP_025882163.1 WAT1-related protein At5g47470 [Oryza sativa Japonica Group]	-	GO:0016020//membrane;GO:0016021//integral component of membrane	-	-
SK1G00047504	2.578	5.37833	1.06091	1.94875e-09	2.04852e-08	--	-	-	-	XP_015627853.1 basic proline-rich protein [Oryza sativa Japonica Group]	-	-	-	-
SK1G00066776	0.455	1.08633	1.25553	1.95781e-09	2.05598e-08	RPS5	Genetic Information Processing;Genetic Information Processing	Folding, sorting and degradation;Folding, sorting and degradation	K03094;K03094	ABA94390.1 NB-ARC domain containing protein [Oryza sativa Japonica Group]	ko04141//Protein processing in endoplasmic reticulum;ko04120//Ubiquitin mediated proteolysis	-	GO:0005515//protein binding;GO:0016818//hydrolase activity, acting on acid anhydrides, in phosphorus-containing anhydrides;GO:0043531//ADP binding	GO:0032297//negative regulation of DNA-dependent DNA replication initiation
SK1G00064713	6.235	13.3033	1.09333	1.98325e-09	2.08044e-08	CYB561B	-	-	-	EAZ06841.1 hypothetical protein OsI_29077 [Oryza sativa Indica Group]	-	-	-	-
SK1G00074654	3.167	1.37367	-1.20508	2.0082e-09	2.10432e-08	MPT1	-	-	-	EEC85028.1 hypothetical protein OsI_32330 [Oryza sativa Indica Group]	-	-	-	-
SK1G00074069	12.4	1.76467	-2.81287	2.1025e-09	2.19518e-08	ERF109	-	-	-	ACC85686.1 EATB [Oryza sativa Indica Group]	-	-	GO:0003700//transcription factor activity, sequence-specific DNA binding	GO:0006355//regulation of transcription, DNA-templated
SK1G00073074	1.153	2.324	1.01122	2.16385e-09	2.25249e-08	--	-	-	-	XP_015651448.1 uncharacterized protein LOC4346531 [Oryza sativa Japonica Group]	-	-	-	-
SK1G00061633	1.356	0.542667	-1.32122	2.22842e-09	2.3108e-08	At3g13560	Metabolism;Metabolism	Global and overview maps;Carbohydrate metabolism	K19892;K19892	KAB8106065.1 hypothetical protein EE612_040255 [Oryza sativa]	ko01100//Metabolic pathways;ko00500//Starch and sucrose metabolism	-	GO:0004553//hydrolase activity, hydrolyzing O-glycosyl compounds	GO:0005975//carbohydrate metabolic process
SK1G00043692	7.849	15.8187	1.01105	2.32424e-09	2.4024e-08	NRR	-	-	-	Q5EN53.1 RecName: Full=Protein NEGATIVE REGULATOR OF RESISTANCE; AltName: Full=NPR1-interactor [Oryza sativa Indica Group]	-	-	-	GO:0010112//regulation of systemic acquired resistance
SK1G00063170	22.732	8.718	-1.38266	2.38339e-09	2.45457e-08	--	-	-	-	BAC79927.1 unknown protein [Oryza sativa Japonica Group]	-	-	-	-
SK1G00057443	0.287	0.741667	1.36972	2.38404e-09	2.45457e-08	pol	-	-	-	ABE60891.1 putative polyprotein [Oryza sativa Japonica Group]	-	-	GO:0003676//nucleic acid binding;GO:0004190//aspartic-type endopeptidase activity;GO:0008270//zinc ion binding	GO:0008150//biological_process
SK1G00051282	3.715	8.402	1.17737	2.38879e-09	2.45858e-08	GGP5	-	-	-	EAY84723.1 hypothetical protein OsI_06091 [Oryza sativa Indica Group]	-	GO:0005951//carbamoyl-phosphate synthase complex	GO:0000107//imidazoleglycerol-phosphate synthase activity;GO:0003824//catalytic activity;GO:0003922//GMP synthase (glutamine-hydrolyzing) activity;GO:0004088//carbamoyl-phosphate synthase (glutamine-hydrolyzing) activity;GO:0004642//phosphoribosylformylglycinamidine synthase activity;GO:0008234//cysteine-type peptidase activity;GO:0016787//hydrolase activity;GO:0016884//carbon-nitrogen ligase act…	GO:0000105//histidine biosynthetic process;GO:0006177//GMP biosynthetic process;GO:0006508//proteolysis;GO:0009152//purine ribonucleotide biosynthetic process;GO:0009220//pyrimidine ribonucleotide biosynthetic process;GO:0042823//pyridoxal phosphate biosynthetic process
SK1G00072586	4.004	9.08167	1.18152	2.39071e-09	2.45969e-08	JAL3	-	-	-	KAB8111985.1 hypothetical protein EE612_049887 [Oryza sativa]	-	-	-	-
SK1G00067415	0.552	0.243	-1.18371	2.45747e-09	2.52568e-08	Os11g0417400	-	-	-	XP_015617585.1 probable protein phosphatase 2C 75 [Oryza sativa Japonica Group]	-	-	GO:0016791//phosphatase activity	-
SK1G00052338	5.315	2.32833	-1.19077	2.48892e-09	2.55436e-08	AVT1C	-	-	-	KAF2932937.1 hypothetical protein DAI22_04g038500 [Oryza sativa Japonica Group]	-	-	-	-
SK1G00074428	0.117	0.4	1.77349	2.63052e-09	2.6854e-08	SBT3.6	-	-	-	EAZ09847.1 hypothetical protein OsI_32138 [Oryza sativa Indica Group]	-	-	GO:0008236//serine-type peptidase activity	GO:0006415//translational termination;GO:0006508//proteolysis;GO:0009306//protein secretion
SK1G00039884	5.912	12.1363	1.03761	2.634e-09	2.688e-08	SF3B4	Genetic Information Processing	Transcription	K12831	XP_015621556.1 splicing factor 3B subunit 4 isoform X2 [Oryza sativa Japonica Group]	ko03040//Spliceosome	-	GO:0003676//nucleic acid binding	GO:0008380//RNA splicing
SK1G00057884	0.762	1.75	1.19949	2.65602e-09	2.70951e-08	Cht1	Metabolism;Environmental Information Processing;Metabolism	Global and overview maps;Signal transduction;Carbohydrate metabolism	K20547;K20547;K20547	THU62428.1 hypothetical protein C4D60_Mb01t05050 [Musa balbisiana]	ko01100//Metabolic pathways;ko04016//MAPK signaling pathway - plant;ko00520//Amino sugar and nucleotide sugar metabolism	-	GO:0004568//chitinase activity;GO:0008061//chitin binding	GO:0006032//chitin catabolic process;GO:0016998//cell wall macromolecule catabolic process
SK1G00066873	4.383	1.86067	-1.2361	2.72637e-09	2.77639e-08	--	-	-	-	XP_015615352.1 uncharacterized protein LOC9272501 [Oryza sativa Japonica Group]	-	-	-	-
SK1G00060871	84.083	26.3827	-1.67222	2.74664e-09	2.79211e-08	--	-	-	-	XP_015647717.1 protein ENHANCED DISEASE RESISTANCE 4 [Oryza sativa Japonica Group]	-	-	-	-
SK1G00069202	33.803	12.4603	-1.43981	2.78714e-09	2.83229e-08	--	-	-	-	EAY89412.1 hypothetical protein OsI_10917 [Oryza sativa Indica Group]	-	-	-	-
MSTRG.23951	0.488	2.544	2.38215	2.87641e-09	2.91379e-08	--	-	-	-	Os08g0331000, partial [Oryza sativa Japonica Group]	-	-	-	-
SK1G00064473	1.306	4.10733	1.65305	2.91986e-09	2.95574e-08	CM2	Metabolism;Metabolism;Metabolism;Metabolism	Global and overview maps;Global and overview maps;Global and overview maps;Amino acid metabolism	K01850;K01850;K01850;K01850	XP_015649134.1 chorismate mutase 2 [Oryza sativa Japonica Group]	ko01100//Metabolic pathways;ko01110//Biosynthesis of secondary metabolites;ko01230//Biosynthesis of amino acids;ko00400//Phenylalanine, tyrosine and tryptophan biosynthesis	-	GO:0004106//chorismate mutase activity	-
SK1G00043825	2.525	1.17967	-1.0979	2.9833e-09	3.01573e-08	--	-	-	-	-	-	-	-	-
SK1G00048968	13.027	3.40767	-1.93465	3.04117e-09	3.07101e-08	4CL2	Metabolism;Metabolism;Metabolism;Metabolism	Global and overview maps;Global and overview maps;Biosynthesis of other secondary metabolites;Metabolism of cofactors and vitamins	K01904;K01904;K01904;K01904	EAY87168.1 hypothetical protein OsI_08569 [Oryza sativa Indica Group]	ko01100//Metabolic pathways;ko01110//Biosynthesis of secondary metabolites;ko00940//Phenylpropanoid biosynthesis;ko00130//Ubiquinone and other terpenoid-quinone biosynthesis	-	GO:0003987//acetate-CoA ligase activity;GO:0004043//L-aminoadipate-semialdehyde dehydrogenase activity;GO:0008668//(2,3-dihydroxybenzoyl)adenylate synthase activity;GO:0008756//o-succinylbenzoate-CoA ligase activity;GO:0030729//acetoacetate-CoA ligase activity;GO:0047473//D-alanine-poly(phosphoribitol) ligase activity;GO:0050218//propionate-CoA ligase activity	GO:0009234//menaquinone biosynthetic process;GO:0019287//isopentenyl diphosphate biosynthetic process, mevalonate pathway;GO:0019290//siderophore biosynthetic process;GO:0019350//teichoic acid biosynthetic process;GO:0019427//acetyl-CoA biosynthetic process from acetate;GO:0019878//lysine biosynthetic process via aminoadipic acid
SK1G00064669	71.654	34.9817	-1.03445	3.05796e-09	3.08581e-08	UGE-2	Metabolism;Metabolism;Metabolism	Global and overview maps;Carbohydrate metabolism;Carbohydrate metabolism	K01784;K01784;K01784	XP_015650590.1 UDP-glucose 4-epimerase 2 [Oryza sativa Japonica Group]	ko01100//Metabolic pathways;ko00520//Amino sugar and nucleotide sugar metabolism;ko00052//Galactose metabolism	GO:0005840//ribosome	GO:0003735//structural constituent of ribosome;GO:0003824//catalytic activity;GO:0003854//3-beta-hydroxy-delta5-steroid dehydrogenase activity;GO:0003978//UDP-glucose 4-epimerase activity;GO:0004043//L-aminoadipate-semialdehyde dehydrogenase activity;GO:0008446//GDP-mannose 4,6-dehydratase activity;GO:0008460//dTDP-glucose 4,6-dehydratase activity;GO:0008667//2,3-dihydro-2,3-dihydroxybenzoate deh…	GO:0000271//polysaccharide biosynthetic process;GO:0005975//carbohydrate metabolic process;GO:0006012//galactose metabolic process;GO:0006412//translation;GO:0006694//steroid biosynthetic process;GO:0009243//O antigen biosynthetic process;GO:0009244//lipopolysaccharide core region biosynthetic process;GO:0019305//dTDP-rhamnose biosynthetic process;GO:0019878//lysine biosynthetic process via amino…
SK1G00041018	1.711	0.625	-1.45291	3.08303e-09	3.10461e-08	UGT88B1	Metabolism;Metabolism	Global and overview maps;Biosynthesis of other secondary metabolites	K22845;K22845	XP_015627617.1 UDP-glycosyltransferase 88B1 [Oryza sativa Japonica Group]	ko01110//Biosynthesis of secondary metabolites;ko00941//Flavonoid biosynthesis	-	GO:0008194//UDP-glycosyltransferase activity	-
SK1G00074008	6.903	3.24367	-1.0896	3.08551e-09	3.10602e-08	FLZ3	-	-	-	EAZ09213.1 hypothetical protein OsI_31488 [Oryza sativa Indica Group]	-	-	-	-
SK1G00060890	1.025	0.436333	-1.23212	3.09216e-09	3.11055e-08	R40C1	-	-	-	EEE67835.1 hypothetical protein OsJ_25614 [Oryza sativa Japonica Group]	-	-	GO:0003964//RNA-directed DNA polymerase activity	GO:0000373//Group II intron splicing
SK1G00071477	2.818	1.31167	-1.10327	3.14737e-09	3.16059e-08	WAV3	-	-	-	BAT11200.1 Os10g0464800 [Oryza sativa Japonica Group]	-	GO:0005680//anaphase-promoting complex	GO:0008168//methyltransferase activity;GO:0008270//zinc ion binding;GO:0016434//rRNA (cytosine) methyltransferase activity;GO:0042802//identical protein binding;GO:0046872//metal ion binding;GO:0061630//ubiquitin protein ligase activity;GO:0097602//cullin family protein binding	GO:0000154//rRNA modification;GO:0031145//anaphase-promoting complex-dependent proteasomal ubiquitin-dependent protein catabolic process
SK1G00043493	1.049	2.781	1.40659	3.15118e-09	3.16332e-08	PGR	-	-	-	EAY72766.1 hypothetical protein OsI_00631 [Oryza sativa Indica Group]	-	GO:0016021//integral component of membrane	-	-
SK1G00053090	5.05	2.31467	-1.12548	3.24961e-09	3.25197e-08	Y-2	-	-	-	XP_015634462.1 suppressor of cytokine signaling 7 [Oryza sativa Japonica Group]	-	-	-	-
SK1G00070010	9.682	2.25467	-2.10239	3.43475e-09	3.4195e-08	--	-	-	-	EEC69363.1 hypothetical protein OsI_38486 [Oryza sativa Indica Group]	-	-	-	-
SK1G00060485	13.769	27.969	1.0224	3.44527e-09	3.42879e-08	brcc3	Genetic Information Processing	Replication and repair	K11864	AAU43989.1 unknown protein [Oryza sativa Japonica Group]	ko03440//Homologous recombination	-	GO:0005515//protein binding;GO:0008237//metallopeptidase activity;GO:0070122//isopeptidase activity	-
SK1G00063998	148.767	298.839	1.00631	3.48944e-09	3.47036e-08	CM-LOX1	Metabolism;Metabolism;Metabolism;Metabolism	Global and overview maps;Global and overview maps;Lipid metabolism;Lipid metabolism	K00454;K00454;K00454;K00454	XP_015650717.1 lipoxygenase 7, chloroplastic [Oryza sativa Japonica Group]	ko01100//Metabolic pathways;ko01110//Biosynthesis of secondary metabolites;ko00592//alpha-Linolenic acid metabolism;ko00591//Linoleic acid metabolism	-	GO:0005515//protein binding;GO:0016702//oxidoreductase activity, acting on single donors with incorporation of molecular oxygen, incorporation of two atoms of oxygen;GO:0046872//metal ion binding	GO:0055114//oxidation-reduction process
SK1G00040988	1.255	2.55933	1.02808	3.50881e-09	3.48723e-08	BBD1	-	-	-	B8A8D2.1 RecName: Full=Bifunctional nuclease 1 [Oryza sativa Indica Group]	-	-	GO:0004518//nuclease activity;GO:0005515//protein binding	-
SK1G00045980	0.01	0.140333	3.81079	3.54802e-09	3.52377e-08	TY3B-G	-	-	-	ABF96568.1 retrotransposon protein, putative, Ty3-gypsy subclass [Oryza sativa Japonica Group]	-	-	GO:0003676//nucleic acid binding;GO:0004190//aspartic-type endopeptidase activity;GO:0008270//zinc ion binding	GO:0006508//proteolysis;GO:0008150//biological_process;GO:0015074//DNA integration
SK1G00049362	108.349	49.011	-1.14451	3.55631e-09	3.53079e-08	PIP2-2	-	-	-	EAY86778.1 hypothetical protein OsI_08158 [Oryza sativa Indica Group]	-	GO:0016020//membrane	GO:0015267//channel activity	GO:0055085//transmembrane transport
SK1G00051287	0.159	0.643333	2.01654	3.56115e-09	3.53439e-08	MIMI_L728	-	-	-	EAY84727.1 hypothetical protein OsI_06095 [Oryza sativa Indica Group]	-	-	-	-
SK1G00050004	36.995	16.4117	-1.17261	3.59672e-09	3.56724e-08	--	-	-	-	EAY86103.1 hypothetical protein OsI_07473 [Oryza sativa Indica Group]	-	-	-	-
SK1G00059599	0.432	0.173667	-1.31471	3.60597e-09	3.57397e-08	REL2	-	-	-	XP_015637799.1 nitrate regulatory gene2 protein [Oryza sativa Japonica Group]	-	-	-	-
SK1G00051150	7.124	2.43267	-1.55015	3.63206e-09	3.59859e-08	--	-	-	-	EAY84839.1 hypothetical protein OsI_06204 [Oryza sativa Indica Group]	-	-	-	-
SK1G00070863	7.93	19.2443	1.27904	3.94151e-09	3.8839e-08	2ODD11	-	-	-	XP_015614185.1 S-norcoclaurine synthase 1-like [Oryza sativa Japonica Group]	-	-	GO:0016491//oxidoreductase activity	GO:0055114//oxidation-reduction process
SK1G00068740	0.45	1.393	1.6302	3.95207e-09	3.89298e-08	PAT04	-	-	-	EAY82169.1 hypothetical protein OsI_37369 [Oryza sativa Indica Group]	-	-	GO:0016409//palmitoyltransferase activity	-
SK1G00047850	15.164	32.428	1.09659	3.97863e-09	3.91647e-08	F3H-2	-	-	-	ABF93708.1 oxidoreductase, 2OG-Fe oxygenase family protein, expressed [Oryza sativa Japonica Group]	-	-	GO:0016491//oxidoreductase activity	GO:0055114//oxidation-reduction process
SK1G00043116	0.039	0.893667	4.51819	3.98046e-09	3.91694e-08	--	-	-	-	EAY73047.1 hypothetical protein OsI_00922 [Oryza sativa Indica Group]	-	-	-	-
SK1G00065102	5.26	2.45867	-1.09719	4.09257e-09	4.01769e-08	HIP	-	-	-	EAZ06447.1 hypothetical protein OsI_28685 [Oryza sativa Indica Group]	-	GO:0009279//cell outer membrane	GO:0005515//protein binding	GO:0035556//intracellular signal transduction
SK1G00064798	5.878	2.799	-1.07041	4.21487e-09	4.13214e-08	--	-	-	-	XP_025883318.1 uncharacterized protein LOC4345361 [Oryza sativa Japonica Group]	-	-	-	-
SK1G00048543	98.39	47.0693	-1.06372	4.53716e-09	4.41518e-08	ATL11	-	-	-	AAS91046.1 RING/C3HC4/PHD zinc finger-like protein [Oryza sativa Japonica Group]	-	GO:0000109//nucleotide-excision repair complex;GO:0005680//anaphase-promoting complex	GO:0008270//zinc ion binding;GO:0046872//metal ion binding;GO:0061630//ubiquitin protein ligase activity;GO:0097602//cullin family protein binding	GO:0006289//nucleotide-excision repair;GO:0009116//nucleoside metabolic process;GO:0031145//anaphase-promoting complex-dependent proteasomal ubiquitin-dependent protein catabolic process
SK1G00046706	216.661	76.97	-1.49307	4.56454e-09	4.44033e-08	MPK5	Organismal Systems;Environmental Information Processing	Environmental adaptation;Signal transduction	K20536;K20536	AAK01710.1 MAP kinase BIMK1 [Oryza sativa Indica Group]	ko04626//Plant-pathogen interaction;ko04016//MAPK signaling pathway - plant	-	GO:0004672//protein kinase activity;GO:0005524//ATP binding	GO:0006468//protein phosphorylation
SK1G00055988	4.465	1.941	-1.20186	4.59079e-09	4.46287e-08	RAC4	Cellular Processes	Transport and catabolism	K04392	XP_015641323.1 rac-like GTP-binding protein 4 [Oryza sativa Japonica Group]	ko04145//Phagosome	-	GO:0003924//GTPase activity;GO:0005525//GTP binding	-
SK1G00055981	1.582	3.322	1.0703	4.61831e-09	4.4851e-08	AXY4	-	-	-	XP_015641518.1 protein ALTERED XYLOGLUCAN 4 [Oryza sativa Japonica Group]	-	-	-	-
SK1G00043263	7.889	3.071	-1.36113	4.70285e-09	4.56413e-08	UGT75C1	-	-	-	KAB8080217.1 hypothetical protein EE612_000610 [Oryza sativa]	-	-	GO:0008194//UDP-glycosyltransferase activity;GO:0016758//transferase activity, transferring hexosyl groups	-
SK1G00063835	0.669	1.42633	1.09223	4.71704e-09	4.57637e-08	PTF2	-	-	-	BAD11652.1 unknown protein [Oryza sativa Japonica Group]	-	-	GO:0004386//helicase activity;GO:0017025//TBP-class protein binding	GO:0043571//maintenance of CRISPR repeat elements
SK1G00057445	49.68	18.422	-1.43124	4.80673e-09	4.65558e-08	WRKY28	-	-	-	BAF20130.1 Os06g0649000, partial [Oryza sativa Japonica Group]	-	-	GO:0003677//DNA binding;GO:0003700//transcription factor activity, sequence-specific DNA binding;GO:0043565//sequence-specific DNA binding	GO:0006355//regulation of transcription, DNA-templated
SK1G00044757	5.267	13.3363	1.34031	4.88545e-09	4.72707e-08	AZI1	-	-	-	XP_015628873.1 cortical cell-delineating protein [Oryza sativa Japonica Group]	-	GO:0016021//integral component of membrane	-	GO:0010468//regulation of gene expression
SK1G00055627	2.675	5.62633	1.07266	4.98861e-09	4.81883e-08	OsI_021120	Genetic Information Processing	Folding, sorting and degradation	K02728	XP_015643487.1 proteasome subunit alpha type-4-1 [Oryza sativa Japonica Group]	ko03050//Proteasome	GO:0000502//proteasome complex;GO:0005839//proteasome core complex;GO:0019773//proteasome core complex, alpha-subunit complex	GO:0004175//endopeptidase activity;GO:0004298//threonine-type endopeptidase activity	GO:0006511//ubiquitin-dependent protein catabolic process;GO:0010498//proteasomal protein catabolic process;GO:0051603//proteolysis involved in cellular protein catabolic process
SK1G00068283	0.173	0.620333	1.84227	5.07592e-09	4.89487e-08	SMXL3	-	-	-	EEC67707.1 hypothetical protein OsI_35183 [Oryza sativa Indica Group]	-	GO:0009368//endopeptidase Clp complex;GO:0033104//type VI protein secretion system complex	GO:0004176//ATP-dependent peptidase activity;GO:0042623//ATPase activity, coupled	GO:0006457//protein folding;GO:0006508//proteolysis;GO:0033103//protein secretion by the type VI secretion system;GO:0043335//protein unfolding
MSTRG.5678	0.057	0.626	3.45713	5.09252e-09	4.90772e-08	--	-	-	-	Os10g0378500, partial [Oryza sativa Japonica Group]	-	-	-	-
SK1G00048763	0.804	0.253333	-1.66616	5.10162e-09	4.91485e-08	SERL2	-	-	-	EEC73926.1 hypothetical protein OsI_08784 [Oryza sativa Indica Group]	-	-	GO:0004672//protein kinase activity;GO:0005515//protein binding;GO:0005524//ATP binding	GO:0006468//protein phosphorylation
SK1G00064003	1.888	0.827	-1.1909	5.23432e-09	5.03599e-08	IRKI	-	-	-	XP_015648068.1 IRK-interacting protein [Oryza sativa Japonica Group]	-	GO:0031514//motile cilium	GO:0000774//adenyl-nucleotide exchange factor activity;GO:0008134//transcription factor binding;GO:0042803//protein homodimerization activity;GO:0051087//chaperone binding;GO:0070840//dynein complex binding	GO:0006457//protein folding;GO:0048870//cell motility
SK1G00060283	9.307	3.899	-1.25521	5.71031e-09	5.46485e-08	CSLC7	-	-	-	XP_015637340.1 probable xyloglucan glycosyltransferase 7 [Oryza sativa Japonica Group]	-	-	GO:0008375//acetylglucosaminyltransferase activity;GO:0016757//transferase activity, transferring glycosyl groups	GO:0042710//biofilm formation
SK1G00059287	2.766	1.00967	-1.45392	5.78652e-09	5.53047e-08	NPF2.3	-	-	-	XP_015640314.1 protein NRT1/ PTR FAMILY 2.3 [Oryza sativa Japonica Group]	-	GO:0016020//membrane	GO:0022857//transmembrane transporter activity	GO:0055085//transmembrane transport
MSTRG.21089	0.727	3.58167	2.3006	5.81279e-09	5.55374e-08	--	-	-	-	-	-	-	-	-
SK1G00067081	0.883	2.99667	1.76287	5.96712e-09	5.68617e-08	--	-	-	-	XP_015615819.1 uncharacterized protein LOC4350562 [Oryza sativa Japonica Group]	-	-	-	-
SK1G00046854	0.875	0.338333	-1.37084	6.08499e-09	5.78324e-08	--	-	-	-	XP_015629754.1 uncharacterized protein LOC4332380 [Oryza sativa Japonica Group]	-	GO:0016020//membrane	GO:0016757//transferase activity, transferring glycosyl groups	-
SK1G00052825	0.726	2.80933	1.95219	6.23337e-09	5.91261e-08	CRK25	-	-	-	XP_015633954.1 cysteine-rich receptor-like protein kinase 6 [Oryza sativa Japonica Group]	-	-	-	-
SK1G00060405	29.353	13.8087	-1.08793	6.27608e-09	5.95116e-08	HSFA4D	-	-	-	XP_015639851.1 heat stress transcription factor A-4d [Oryza sativa Japonica Group]	-	-	GO:0003700//transcription factor activity, sequence-specific DNA binding;GO:0043565//sequence-specific DNA binding	GO:0006355//regulation of transcription, DNA-templated
SK1G00042256	2.136	0.508333	-2.07106	6.60501e-09	6.23427e-08	GRXC1	-	-	-	XP_015642996.1 glutaredoxin-C1 [Oryza sativa Japonica Group]	-	-	GO:0009055//electron carrier activity;GO:0015035//protein disulfide oxidoreductase activity;GO:0015036//disulfide oxidoreductase activity	GO:0055114//oxidation-reduction process
SK1G00053220	6.17	13.1413	1.09077	6.61324e-09	6.23611e-08	--	-	-	-	-	-	-	-	GO:0015628//protein secretion by the type II secretion system
SK1G00048423	2.084	4.43467	1.08947	6.68642e-09	6.30101e-08	--	-	-	-	BAS81195.1 Os02g0778800 [Oryza sativa Japonica Group]	-	-	-	-
SK1G00065381	67.956	27.6073	-1.29955	6.78804e-09	6.39053e-08	--	-	-	-	EAZ06096.1 hypothetical protein OsI_28332 [Oryza sativa Indica Group]	-	GO:0000145//exocyst	-	GO:0006887//exocytosis
SK1G00057030	0.547	1.458	1.41438	7.20429e-09	6.75601e-08	DTX51	-	-	-	KAB8102799.1 hypothetical protein EE612_034793 [Oryza sativa]	-	GO:0016020//membrane	GO:0015238//drug transmembrane transporter activity;GO:0015297//antiporter activity;GO:0042910//xenobiotic transporter activity	GO:0006855//drug transmembrane transport;GO:0042493//response to drug;GO:0055085//transmembrane transport
SK1G00045764	6.818	19.1033	1.4864	7.26152e-09	6.80526e-08	BUB3.1	-	-	-	EEC75559.1 hypothetical protein OsI_12223 [Oryza sativa Indica Group]	-	-	GO:0005515//protein binding	GO:0055085//transmembrane transport
SK1G00070665	0.014	0.603667	5.43025	7.35307e-09	6.88212e-08	--	-	-	-	EAY84018.1 hypothetical protein OsI_39249 [Oryza sativa Indica Group]	-	GO:0005886//plasma membrane	GO:0003674//molecular_function;GO:0003700//transcription factor activity, sequence-specific DNA binding	GO:0006355//regulation of transcription, DNA-templated;GO:0008150//biological_process
SK1G00042868	1.908	0.660667	-1.53007	7.51135e-09	7.01893e-08	--	-	-	-	BAS71391.1 Os01g0256300, partial [Oryza sativa Japonica Group]	-	-	GO:0043531//ADP binding	-
SK1G00063635	2.641	1.01767	-1.37582	7.52048e-09	7.02518e-08	UFC	-	-	-	EEE55291.1 hypothetical protein OsJ_03239 [Oryza sativa Japonica Group]	-	-	-	-
SK1G00054171	0.001	0.600667	9.23042	7.57368e-09	7.0726e-08	--	-	-	-	KAB8083208.1 hypothetical protein EE612_005333 [Oryza sativa]	-	-	-	-
SK1G00063300	7.871	16.5997	1.07654	7.70029e-09	7.18156e-08	IDS3	-	-	-	KAF2921600.1 hypothetical protein DAI22_07g046900 [Oryza sativa Japonica Group]	-	-	GO:0016491//oxidoreductase activity	GO:0055114//oxidation-reduction process
SK1G00060324	12.687	3.46767	-1.87131	7.70718e-09	7.18335e-08	--	-	-	-	-	-	-	-	-
SK1G00054951	1.824	3.679	1.01221	8.08988e-09	7.51582e-08	ARAD1	-	-	-	XP_015637045.1 probable arabinosyltransferase ARAD1 [Oryza sativa Japonica Group]	-	-	-	-
SK1G00052192	0.66	1.53167	1.21456	8.21843e-09	7.62056e-08	PSI3	-	-	-	EAY93030.1 hypothetical protein OsI_14830 [Oryza sativa Indica Group]	-	-	-	GO:0045927//positive regulation of growth
SK1G00065157	1.573	0.544333	-1.53096	8.43337e-09	7.78989e-08	RTNLB21	-	-	-	XP_015648255.1 reticulon-like protein B21 [Oryza sativa Japonica Group]	-	-	-	GO:0001539//cilium or flagellum-dependent cell motility
SK1G00053477	488.002	226.201	-1.10928	8.44783e-09	7.80075e-08	FRO7	-	-	-	EEC77356.1 hypothetical protein OsI_16048 [Oryza sativa Indica Group]	-	-	GO:0016491//oxidoreductase activity	GO:0055114//oxidation-reduction process
SK1G00049639	29.923	13.493	-1.14904	8.48815e-09	7.82908e-08	Os03g0232800	-	-	-	XP_015623535.1 lecithin-cholesterol acyltransferase-like 1 [Oryza sativa Japonica Group]	-	-	GO:0003824//catalytic activity;GO:0008236//serine-type peptidase activity;GO:0008374//O-acyltransferase activity;GO:0016787//hydrolase activity;GO:0016788//hydrolase activity, acting on ester bonds;GO:0018738//S-formylglutathione hydrolase activity	GO:0006508//proteolysis;GO:0006629//lipid metabolic process;GO:0009102//biotin biosynthetic process;GO:0046292//formaldehyde metabolic process
SK1G00055955	3.072	6.608	1.10504	8.64114e-09	7.95893e-08	--	-	-	-	XP_015641443.1 uncharacterized protein LOC4340614 [Oryza sativa Japonica Group]	-	-	-	-
SK1G00074864	0.221	0.903	2.03068	9.17474e-09	8.4129e-08	EXO70A1	-	-	-	EEC78286.1 hypothetical protein OsI_17995 [Oryza sativa Indica Group]	-	GO:0000145//exocyst	-	GO:0006887//exocytosis
SK1G00062918	5.16	10.4233	1.01437	9.26448e-09	8.48711e-08	RPS2D	Genetic Information Processing	Translation	K02981	XP_015644712.1 40S ribosomal protein S2-3 [Oryza sativa Japonica Group]	ko03010//Ribosome	GO:0000312//plastid small ribosomal subunit;GO:0005840//ribosome;GO:0022627//cytosolic small ribosomal subunit	GO:0003723//RNA binding;GO:0003735//structural constituent of ribosome	GO:0006412//translation
SK1G00054078	43.906	8.916	-2.29995	9.28614e-09	8.49887e-08	PAL	Metabolism;Metabolism;Metabolism;Metabolism	Global and overview maps;Global and overview maps;Biosynthesis of other secondary metabolites;Amino acid metabolism	K10775;K10775;K10775;K10775	XP_015633749.1 phenylalanine ammonia-lyase [Oryza sativa Japonica Group]	ko01100//Metabolic pathways;ko01110//Biosynthesis of secondary metabolites;ko00940//Phenylpropanoid biosynthesis;ko00360//Phenylalanine metabolism	-	GO:0004397//histidine ammonia-lyase activity;GO:0016841//ammonia-lyase activity;GO:0050368//tyrosine 2,3-aminomutase activity	GO:0006548//histidine catabolic process;GO:0009058//biosynthetic process;GO:0009698//phenylpropanoid metabolic process
SK1G00051104	0.1	0.474333	2.2459	9.41312e-09	8.59877e-08	CYP74A4	Metabolism;Metabolism;Metabolism	Global and overview maps;Global and overview maps;Lipid metabolism	K01723;K01723;K01723	EAY85033.1 hypothetical protein OsI_06390 [Oryza sativa Indica Group]	ko01100//Metabolic pathways;ko01110//Biosynthesis of secondary metabolites;ko00592//alpha-Linolenic acid metabolism	-	GO:0005506//iron ion binding;GO:0016705//oxidoreductase activity, acting on paired donors, with incorporation or reduction of molecular oxygen;GO:0020037//heme binding	GO:0055114//oxidation-reduction process
SK1G00046146	0.012	1.479	6.94544	9.45102e-09	8.62843e-08	EDS	-	-	-	EAY90098.1 hypothetical protein OsI_11665 [Oryza sativa Indica Group]	-	-	GO:0000287//magnesium ion binding;GO:0010333//terpene synthase activity;GO:0016829//lyase activity	GO:0009399//nitrogen fixation
SK1G00058168	0.943	3.20933	1.76694	9.47878e-09	8.64509e-08	D27	-	-	-	XP_015637866.1 beta-carotene isomerase D27, chloroplastic isoform X1 [Oryza sativa Japonica Group]	-	-	-	-
SK1G00046389	1.14	0.46	-1.30933	9.66001e-09	8.80483e-08	At1g54610	-	-	-	XP_015628159.1 probable serine/threonine-protein kinase At1g54610 [Oryza sativa Japonica Group]	-	-	GO:0004672//protein kinase activity;GO:0005524//ATP binding	GO:0006468//protein phosphorylation
SK1G00062697	0.566	0.163	-1.79593	9.72628e-09	8.85964e-08	NRAMP5	-	-	-	XP_015645014.1 metal transporter Nramp5 [Oryza sativa Japonica Group]	-	GO:0005887//integral component of plasma membrane;GO:0016020//membrane	GO:0046873//metal ion transmembrane transporter activity	GO:0030001//metal ion transport
SK1G00057832	59.54	20.3483	-1.54895	9.77626e-09	8.89957e-08	XTH25	Environmental Information Processing	Signal transduction	K14504	KAA3471552.1 xyloglucan endotransglucosylase/hydrolase protein 22-like [Gossypium australe]	ko04075//Plant hormone signal transduction	GO:0005618//cell wall;GO:0048046//apoplast	GO:0004553//hydrolase activity, hydrolyzing O-glycosyl compounds;GO:0016762//xyloglucan:xyloglucosyl transferase activity	GO:0005975//carbohydrate metabolic process;GO:0006073//cellular glucan metabolic process
SK1G00061915	0.56	1.26333	1.17374	9.81111e-09	8.92848e-08	CAPH2	-	-	-	EEC82147.1 hypothetical protein OsI_26204 [Oryza sativa Indica Group]	-	GO:0000796//condensin complex	GO:0005515//protein binding	GO:0007076//mitotic chromosome condensation
SK1G00068145	6.678	15.6613	1.22972	9.82006e-09	8.93382e-08	XA21	-	-	-	KAF2909740.1 hypothetical protein DAI22_11g049001 [Oryza sativa Japonica Group]	-	-	GO:0004672//protein kinase activity;GO:0005515//protein binding;GO:0005524//ATP binding	GO:0006468//protein phosphorylation
SK1G00057622	1.609	3.93367	1.28971	9.92813e-09	9.01795e-08	ILL6	-	-	-	XP_015640989.1 IAA-amino acid hydrolase ILR1-like 6 [Oryza sativa Japonica Group]	-	-	GO:0004180//carboxypeptidase activity;GO:0004222//metalloendopeptidase activity;GO:0016787//hydrolase activity	GO:0006508//proteolysis
SK1G00056911	18.098	42.8917	1.24487	9.97163e-09	9.05056e-08	PER52	Metabolism;Metabolism;Metabolism	Global and overview maps;Global and overview maps;Biosynthesis of other secondary metabolites	K00430;K00430;K00430	XP_015643864.1 peroxidase P7 [Oryza sativa Japonica Group]	ko01100//Metabolic pathways;ko01110//Biosynthesis of secondary metabolites;ko00940//Phenylpropanoid biosynthesis	-	GO:0004601//peroxidase activity;GO:0020037//heme binding	GO:0006979//response to oxidative stress;GO:0055114//oxidation-reduction process
SK1G00060487	0.587	3.466	2.56184	1.02923e-08	9.30782e-08	At1g80170	Metabolism;Metabolism	Global and overview maps;Carbohydrate metabolism	K01213;K01213	XP_015640423.1 probable polygalacturonase At1g80170 [Oryza sativa Japonica Group]	ko01100//Metabolic pathways;ko00040//Pentose and glucuronate interconversions	-	GO:0004650//polygalacturonase activity	GO:0005975//carbohydrate metabolic process
SK1G00057058	0.218	0.712667	1.7089	1.03199e-08	9.32123e-08	XA21	-	-	-	KAF2927321.1 hypothetical protein DAI22_06g196100 [Oryza sativa Japonica Group]	-	-	GO:0004672//protein kinase activity;GO:0005515//protein binding;GO:0005524//ATP binding	GO:0006468//protein phosphorylation
SK1G00043126	1.573	3.74033	1.24965	1.032e-08	9.32123e-08	BHLH51	-	-	-	XP_025879685.1 transcription factor bHLH30 [Oryza sativa Japonica Group]	-	-	GO:0008773//[protein-PII] uridylyltransferase activity;GO:0046983//protein dimerization activity	GO:0018177//protein uridylylation
SK1G00074888	0.191	0.06	-1.67054	1.04728e-08	9.44445e-08	At1g49730	-	-	-	EEC78301.1 hypothetical protein OsI_18023 [Oryza sativa Indica Group]	-	-	GO:0004672//protein kinase activity;GO:0005524//ATP binding	GO:0006468//protein phosphorylation
SK1G00039707	51.226	13.897	-1.8821	1.05816e-08	9.53964e-08	--	-	-	-	EAY76877.1 hypothetical protein OsI_04834 [Oryza sativa Indica Group]	-	GO:0000145//exocyst	-	GO:0006887//exocytosis
SK1G00053551	4.013	8.21433	1.03346	1.06489e-08	9.59496e-08	--	-	-	-	XP_015636748.1 uncharacterized protein LOC9267194 [Oryza sativa Japonica Group]	-	-	-	-
SK1G00074885	0.141	0.593667	2.07396	1.10411e-08	9.926e-08	Sb03g046810	Metabolism;Metabolism;Metabolism	Global and overview maps;Global and overview maps;Biosynthesis of other secondary metabolites	K00430;K00430;K00430	CAB53486.1 CAA303713.1 protein [Oryza sativa]	ko01100//Metabolic pathways;ko01110//Biosynthesis of secondary metabolites;ko00940//Phenylpropanoid biosynthesis	GO:0030126//COPI vesicle coat	GO:0004096//catalase activity;GO:0004601//peroxidase activity;GO:0005198//structural molecule activity;GO:0005515//protein binding;GO:0020037//heme binding	GO:0006886//intracellular protein transport;GO:0006979//response to oxidative stress;GO:0016192//vesicle-mediated transport;GO:0055114//oxidation-reduction process
SK1G00067829	3.285	6.78067	1.04553	1.10455e-08	9.92691e-08	CRK35	-	-	-	KAF2910151.1 hypothetical protein DAI22_11g079700 [Oryza sativa Japonica Group]	-	-	GO:0003674//molecular_function;GO:0004413//homoserine kinase activity;GO:0004672//protein kinase activity;GO:0005524//ATP binding	GO:0006468//protein phosphorylation;GO:0009088//threonine biosynthetic process;GO:0009306//protein secretion
SK1G00061080	4.007	10.398	1.37571	1.10519e-08	9.92954e-08	PER70	Metabolism;Metabolism;Metabolism	Global and overview maps;Global and overview maps;Biosynthesis of other secondary metabolites	K00430;K00430;K00430	KAF2924500.1 hypothetical protein DAI22_07g272800 [Oryza sativa Japonica Group]	ko01100//Metabolic pathways;ko01110//Biosynthesis of secondary metabolites;ko00940//Phenylpropanoid biosynthesis	-	GO:0004601//peroxidase activity;GO:0020037//heme binding	GO:0006979//response to oxidative stress;GO:0055114//oxidation-reduction process
SK1G00044250	3.741	9.253	1.3065	1.13996e-08	1.02007e-07	--	-	-	-	VAH74216.1 unnamed protein product [Triticum turgidum subsp. durum] [Triticum turgidum]	-	-	-	-
SK1G00042998	5.674	2.70433	-1.06909	1.17008e-08	1.04508e-07	--	-	-	-	XP_015631916.1 uncharacterized protein LOC4327776 [Oryza sativa Japonica Group]	-	-	-	-
SK1G00070556	3.866	8.28067	1.09891	1.17076e-08	1.04537e-07	CHX19	-	-	-	EEC69681.1 hypothetical protein OsI_39126 [Oryza sativa Indica Group]	-	GO:0016021//integral component of membrane	GO:0005451//monovalent cation:proton antiporter activity;GO:0015299//solute:proton antiporter activity	GO:0006812//cation transport;GO:0015992//proton transport;GO:0055085//transmembrane transport
SK1G00074101	0.181	0.726667	2.0053	1.17665e-08	1.05031e-07	nep1	-	-	-	EAZ09339.1 hypothetical protein OsI_31611 [Oryza sativa Indica Group]	-	GO:0005840//ribosome	GO:0003735//structural constituent of ribosome;GO:0005515//protein binding	GO:0006289//nucleotide-excision repair;GO:0006412//translation
SK1G00049869	1.774	3.976	1.16431	1.19911e-08	1.06903e-07	PSI1	-	-	-	XP_015627589.1 uncharacterized protein LOC4329634 [Oryza sativa Japonica Group]	-	GO:0005840//ribosome	GO:0003735//structural constituent of ribosome	GO:0006412//translation;GO:0045927//positive regulation of growth
SK1G00057167	9.339	3.87133	-1.27044	1.20047e-08	1.06979e-07	UGT75L6	-	-	-	XP_015641689.1 crocetin glucosyltransferase, chloroplastic [Oryza sativa Japonica Group]	-	-	GO:0005524//ATP binding;GO:0008194//UDP-glycosyltransferase activity;GO:0016758//transferase activity, transferring hexosyl groups;GO:0030983//mismatched DNA binding	GO:0006298//mismatch repair
SK1G00071878	1.118	3.137	1.48847	1.24334e-08	1.10337e-07	--	-	-	-	BAT10655.1 Os10g0389402, partial [Oryza sativa Japonica Group]	-	-	-	-
SK1G00054787	50.403	19.6363	-1.35998	1.24692e-08	1.10586e-07	FPS	Metabolism;Metabolism;Metabolism	Global and overview maps;Global and overview maps;Metabolism of terpenoids and polyketides	K00787;K00787;K00787	XP_015634051.1 farnesyl pyrophosphate synthase 2 [Oryza sativa Japonica Group]	ko01100//Metabolic pathways;ko01110//Biosynthesis of secondary metabolites;ko00900//Terpenoid backbone biosynthesis	-	GO:0000010//trans-hexaprenyltranstransferase activity;GO:0005509//calcium ion binding;GO:0005544//calcium-dependent phospholipid binding;GO:0050347//trans-octaprenyltranstransferase activity	GO:0008299//isoprenoid biosynthetic process;GO:0009234//menaquinone biosynthetic process;GO:0010236//plastoquinone biosynthetic process
SK1G00056037	13.412	30.3163	1.17657	1.29885e-08	1.14804e-07	COL16	-	-	-	EAZ00428.1 hypothetical protein OsI_22452 [Oryza sativa Indica Group]	-	-	GO:0005515//protein binding;GO:0008270//zinc ion binding	-
SK1G00039965	140.742	41.7607	-1.75284	1.32857e-08	1.17324e-07	DIVARICATA	-	-	-	AIX87959.1 MYB transcription factor [Oryza sativa Indica Group]	-	-	GO:0003700//transcription factor activity, sequence-specific DNA binding	GO:0006355//regulation of transcription, DNA-templated
SK1G00042660	0.46	0.126667	-1.8606	1.35119e-08	1.19285e-07	--	-	-	-	AAU44323.1 putative polyprotein [Oryza sativa Japonica Group]	-	GO:0045263//proton-transporting ATP synthase complex, coupling factor F(o)	GO:0015078//hydrogen ion transmembrane transporter activity	GO:0015986//ATP synthesis coupled proton transport
SK1G00055192	1.513	4.64567	1.61847	1.36998e-08	1.2087e-07	FLZ1	-	-	-	KAB8100981.1 hypothetical protein EE612_031648 [Oryza sativa]	-	-	-	-
SK1G00039871	8.517	2.95167	-1.52882	1.40809e-08	1.24081e-07	CEPR2	-	-	-	EAY76695.1 hypothetical protein OsI_04648 [Oryza sativa Indica Group]	-	-	GO:0004672//protein kinase activity;GO:0005515//protein binding;GO:0005524//ATP binding	GO:0006468//protein phosphorylation
SK1G00060770	1.924	5.657	1.55593	1.41567e-08	1.24673e-07	WRKY35	Organismal Systems;Environmental Information Processing	Environmental adaptation;Signal transduction	K13425;K13425	BAH93271.1 Os05g0584000 [Oryza sativa Japonica Group]	ko04626//Plant-pathogen interaction;ko04016//MAPK signaling pathway - plant	-	GO:0003700//transcription factor activity, sequence-specific DNA binding;GO:0043565//sequence-specific DNA binding	GO:0006355//regulation of transcription, DNA-templated
SK1G00050963	2.031	5.351	1.39762	1.44863e-08	1.27459e-07	--	-	-	-	EAY85081.1 hypothetical protein OsI_06437 [Oryza sativa Indica Group]	-	-	-	GO:0006397//mRNA processing
SK1G00066329	0.182	1.221	2.74605	1.57095e-08	1.37261e-07	--	-	-	-	BBD82296.1 calmodulin-binding protein-like [Oryza sativa Indica Group]	-	-	GO:0005516//calmodulin binding	GO:0008219//cell death
SK1G00052415	0.385	0.950333	1.30358	1.5886e-08	1.38594e-07	FMO1	-	-	-	OAY62979.1 putative flavin-containing monooxygenase 1 [Ananas comosus]	-	GO:0005737//cytoplasm;GO:0009331//glycerol-3-phosphate dehydrogenase complex;GO:0009342//glutamate synthase complex (NADPH);GO:0016020//membrane	GO:0000155//phosphorelay sensor kinase activity;GO:0003824//catalytic activity;GO:0004355//glutamate synthase (NADPH) activity;GO:0004368//glycerol-3-phosphate dehydrogenase activity;GO:0004499//N,N-dimethylaniline monooxygenase activity;GO:0004673//protein histidine kinase activity;GO:0004729//oxygen-dependent protoporphyrinogen oxidase activity;GO:0004791//thioredoxin-disulfide reductase activi…	GO:0000160//phosphorelay signal transduction system;GO:0006071//glycerol metabolic process;GO:0006537//glutamate biosynthetic process;GO:0006779//porphyrin-containing compound biosynthetic process;GO:0006790//sulfur compound metabolic process;GO:0006813//potassium ion transport;GO:0008652//cellular amino acid biosynthetic process;GO:0009228//thiamine biosynthetic process;GO:0009252//peptidoglycan…
SK1G00060323	4.603	1.00867	-2.19012	1.61499e-08	1.40557e-07	--	-	-	-	-	-	-	-	-
SK1G00068279	0.476	1.488	1.64434	1.64176e-08	1.42801e-07	OFP13	-	-	-	EAY80010.1 hypothetical protein OsI_35178 [Oryza sativa Indica Group]	-	-	-	-
SK1G00049260	0.548	0.125	-2.13225	1.69238e-08	1.46983e-07	--	-	-	-	KAB8088179.1 hypothetical protein EE612_012693 [Oryza sativa]	-	-	GO:0005198//structural molecule activity;GO:0005515//protein binding	-
SK1G00049062	48.292	21.91	-1.14019	1.72474e-08	1.49569e-07	BRH1	-	-	-	EAY87081.1 hypothetical protein OsI_08479 [Oryza sativa Indica Group]	-	GO:0005680//anaphase-promoting complex	GO:0008270//zinc ion binding;GO:0046872//metal ion binding;GO:0061630//ubiquitin protein ligase activity;GO:0097602//cullin family protein binding	GO:0031145//anaphase-promoting complex-dependent proteasomal ubiquitin-dependent protein catabolic process
SK1G00074884	17.217	42.7067	1.31063	1.74751e-08	1.51362e-07	Sb03g046810	Metabolism;Metabolism;Metabolism	Global and overview maps;Global and overview maps;Biosynthesis of other secondary metabolites	K00430;K00430;K00430	CAB53489.1 CAA303716.1 protein [Oryza sativa]	ko01100//Metabolic pathways;ko01110//Biosynthesis of secondary metabolites;ko00940//Phenylpropanoid biosynthesis	-	GO:0004096//catalase activity;GO:0004601//peroxidase activity;GO:0020037//heme binding	GO:0006979//response to oxidative stress;GO:0055114//oxidation-reduction process
SK1G00056227	0.683	1.58567	1.21513	1.76263e-08	1.52626e-07	--	-	-	-	BAD54646.1 embryogenesis transmembrane protein-like [Oryza sativa Japonica Group]	-	GO:0005765//lysosomal membrane	-	-
SK1G00041679	2.77	10.584	1.93393	1.76816e-08	1.53013e-07	GPC1	-	-	-	XP_015615982.1 uncharacterized membrane protein C776.05 isoform X1 [Oryza sativa Japonica Group]	-	-	-	-
SK1G00060292	3.029	7.052	1.21919	1.85595e-08	1.59797e-07	SRP54-2	Genetic Information Processing	Folding, sorting and degradation	K03106	XP_015637823.1 signal recognition particle 54 kDa protein 2 [Oryza sativa Japonica Group]	ko03060//Protein export	GO:0005737//cytoplasm;GO:0005786//signal recognition particle, endoplasmic reticulum targeting;GO:0048500//signal recognition particle;GO:0048501//signal recognition particle, plasma membrane targeting	GO:0003924//GTPase activity;GO:0005047//signal recognition particle binding;GO:0005048//signal sequence binding;GO:0005524//ATP binding;GO:0005525//GTP binding;GO:0008312//7S RNA binding;GO:0016301//kinase activity;GO:0016887//ATPase activity;GO:0017111//nucleoside-triphosphatase activity;GO:0043022//ribosome binding	GO:0006614//SRP-dependent cotranslational protein targeting to membrane;GO:0006617//SRP-dependent cotranslational protein targeting to membrane, signal sequence recognition;GO:0009306//protein secretion;GO:0042254//ribosome biogenesis
SK1G00069892	2.002	4.07467	1.02524	1.86757e-08	1.60702e-07	GIF3	-	-	-	EAY83195.1 hypothetical protein OsI_38407 [Oryza sativa Indica Group]	-	-	GO:0003713//transcription coactivator activity	-
SK1G00047246	0.001	0.723667	9.49918	1.96166e-08	1.68297e-07	HB2	-	-	-	XP_015628351.1 non-symbiotic hemoglobin 2 [Oryza sativa Japonica Group]	-	GO:0016020//membrane	GO:0016757//transferase activity, transferring glycosyl groups;GO:0020037//heme binding	-
SK1G00072032	0.721	1.48167	1.03915	1.97355e-08	1.69268e-07	--	-	-	-	XP_015612950.1 pentatricopeptide repeat-containing protein At4g26680, mitochondrial [Oryza sativa Japonica Group]	-	-	-	-
SK1G00061606	5.525	2.46033	-1.16712	2.04042e-08	1.74486e-07	--	-	-	-	XP_015648005.1 uncharacterized protein LOC4343682 [Oryza sativa Japonica Group]	-	-	-	-
SK1G00066934	13.601	47.395	1.80102	2.06043e-08	1.76092e-07	At3g47200	-	-	-	KAF2911161.1 hypothetical protein DAI22_11g157100 [Oryza sativa Japonica Group]	-	-	-	-
SK1G00055444	35.301	13.6157	-1.37444	2.13417e-08	1.8175e-07	SPT	-	-	-	KAF2925365.1 hypothetical protein DAI22_06g046400 [Oryza sativa Japonica Group]	-	-	GO:0004843//thiol-dependent ubiquitin-specific protease activity;GO:0046983//protein dimerization activity;GO:1990380//Lys48-specific deubiquitinase activity	-
SK1G00068615	3.427	1.67333	-1.03422	2.16332e-08	1.8407e-07	At5g18500	-	-	-	EEC68703.1 hypothetical protein OsI_37182 [Oryza sativa Indica Group]	-	-	GO:0004672//protein kinase activity;GO:0005524//ATP binding	GO:0006468//protein phosphorylation;GO:0006955//immune response;GO:0051249//regulation of lymphocyte activation
SK1G00044584	5.846	1.49533	-1.96698	2.17024e-08	1.84496e-07	--	-	-	-	EAY91924.1 hypothetical protein OsI_13608 [Oryza sativa Indica Group]	-	-	GO:0009055//electron carrier activity	-
SK1G00058599	0.654	2.046	1.64544	2.17993e-08	1.85108e-07	--	-	-	-	XP_015638301.1 protein ALP1-like [Oryza sativa Japonica Group]	-	-	GO:0016788//hydrolase activity, acting on ester bonds	-
SK1G00068247	196.558	45.913	-2.09798	2.18821e-08	1.85645e-07	CYP94C1	-	-	-	XP_015615638.1 cytochrome P450 94C1 [Oryza sativa Japonica Group]	-	-	GO:0005506//iron ion binding;GO:0016705//oxidoreductase activity, acting on paired donors, with incorporation or reduction of molecular oxygen;GO:0020037//heme binding	GO:0055114//oxidation-reduction process
SK1G00048749	1.048	2.992	1.51347	2.18889e-08	1.85645e-07	ALDH2B7	Metabolism;Metabolism;Metabolism;Metabolism;Metabolism;Metabolism;Metabolism;Metabolism;Metabolism;Metabolism;Metabolism;Metabolism;Metabolism;Metabolism	Global and overview maps;Global and overview maps;Carbohydrate metabolism;Carbohydrate metabolism;Lipid metabolism;Amino acid metabolism;Amino acid metabolism;Carbohydrate metabolism;Lipid metabolism;Amino acid metabolism;Metabolism of other amino acids;Amino acid metabolism;Amino acid metabolism;Metabolism of terpenoids and polyketides	K00128;K00128;K00128;K00128;K00128;K00128;K00128;K00128;K00128;K00128;K00128;K00128;K00128;K00128	EEC73936.1 hypothetical protein OsI_08800 [Oryza sativa Indica Group]	ko01100//Metabolic pathways;ko01110//Biosynthesis of secondary metabolites;ko00010//Glycolysis / Gluconeogenesis;ko00620//Pyruvate metabolism;ko00561//Glycerolipid metabolism;ko00380//Tryptophan metabolism;ko00330//Arginine and proline metabolism;ko00053//Ascorbate and aldarate metabolism;ko00071//Fatty acid degradation;ko00280//Valine, leucine and isoleucine degradation;ko00410//beta-Alanine met…	-	GO:0003842//1-pyrroline-5-carboxylate dehydrogenase activity;GO:0004491//methylmalonate-semialdehyde dehydrogenase (acylating) activity;GO:0004777//succinate-semialdehyde dehydrogenase (NAD+) activity;GO:0008802//betaine-aldehyde dehydrogenase activity;GO:0009013//succinate-semialdehyde dehydrogenase [NAD(P)+] activity;GO:0016491//oxidoreductase activity;GO:0016620//oxidoreductase activity, actin…	GO:0006527//arginine catabolic process;GO:0006562//proline catabolic process;GO:0006574//valine catabolic process;GO:0006578//amino-acid betaine biosynthetic process;GO:0009450//gamma-aminobutyric acid catabolic process;GO:0055114//oxidation-reduction process
SK1G00050589	1.181	2.59333	1.1348	2.21558e-08	1.87633e-07	--	-	-	-	EEC73034.1 hypothetical protein OsI_06974 [Oryza sativa Indica Group]	-	-	-	-
SK1G00062178	0.005	0.285	5.83289	2.23321e-08	1.88795e-07	--	-	-	-	BAG97793.1 unnamed protein product [Oryza sativa Japonica Group]	-	-	-	-
SK1G00045333	1.458	3.257	1.15955	2.23525e-08	1.88857e-07	--	-	-	-	XP_015629088.1 putative F-box/LRR-repeat protein 9 [Oryza sativa Japonica Group]	-	GO:0005575//cellular_component	GO:0003674//molecular_function;GO:0005515//protein binding	GO:0030243//cellulose metabolic process
SK1G00067765	30.753	10.2893	-1.57958	2.24224e-08	1.89365e-07	RGA5	-	-	-	XP_015615876.1 disease resistance protein RGA5-like [Oryza sativa Japonica Group]	-	-	GO:0003924//GTPase activity;GO:0019001//guanyl nucleotide binding;GO:0031683//G-protein beta/gamma-subunit complex binding;GO:0043531//ADP binding	GO:0007186//G-protein coupled receptor signaling pathway
SK1G00049183	57.648	22.3883	-1.36452	2.24848e-08	1.89753e-07	TPP1	Metabolism;Metabolism;Metabolism	Global and overview maps;Global and overview maps;Carbohydrate metabolism	K01087;K01087;K01087	XP_015623255.1 probable trehalose-phosphate phosphatase 1 [Oryza sativa Japonica Group]	ko01100//Metabolic pathways;ko01110//Biosynthesis of secondary metabolites;ko00500//Starch and sucrose metabolism	-	GO:0003824//catalytic activity;GO:0004805//trehalose-phosphatase activity;GO:0008967//phosphoglycolate phosphatase activity;GO:0016787//hydrolase activity	GO:0005992//trehalose biosynthetic process;GO:0008152//metabolic process
SK1G00047441	263.292	87.396	-1.59102	2.27347e-08	1.91526e-07	TIFY11B	Environmental Information Processing	Signal transduction	K13464	XP_015633147.1 protein TIFY 11b [Oryza sativa Japonica Group]	ko04075//Plant hormone signal transduction	GO:0016592//mediator complex	GO:0003712//transcription cofactor activity	GO:0006357//regulation of transcription from RNA polymerase II promoter
SK1G00046860	1.691	3.57667	1.08074	2.43296e-08	2.03598e-07	At1g76660	-	-	-	BAF11600.1 Os03g0270700, partial [Oryza sativa Japonica Group]	-	-	-	-
SK1G00043447	3.201	1.374	-1.22014	2.43687e-08	2.03867e-07	NIK3	-	-	-	XP_015621261.1 protein NSP-INTERACTING KINASE 3 [Oryza sativa Japonica Group]	-	-	GO:0004672//protein kinase activity;GO:0005515//protein binding;GO:0005524//ATP binding	GO:0006468//protein phosphorylation
SK1G00050953	1.786	0.82	-1.12304	2.43899e-08	2.03934e-07	At1g17710	Metabolism;Metabolism	Global and overview maps;Metabolism of cofactors and vitamins	K13248;K13248	XP_015624007.1 inorganic pyrophosphatase 2 [Oryza sativa Japonica Group]	ko01100//Metabolic pathways;ko00750//Vitamin B6 metabolism	GO:0016020//membrane	GO:0015159//polysaccharide transmembrane transporter activity;GO:0016787//hydrolase activity;GO:0016791//phosphatase activity	GO:0008152//metabolic process;GO:0015774//polysaccharide transport
SK1G00063910	0.589	1.70567	1.534	2.47445e-08	2.06711e-07	--	-	-	-	EAZ07668.1 hypothetical protein OsI_29924 [Oryza sativa Indica Group]	-	-	-	-
SK1G00043359	1.18	4.66733	1.98381	2.52585e-08	2.10823e-07	IDD7	-	-	-	EAY72878.1 hypothetical protein OsI_00752 [Oryza sativa Indica Group]	-	-	GO:0003677//DNA binding	-
SK1G00048681	1.478	3.02167	1.0317	2.59889e-08	2.16606e-07	PUB21	-	-	-	XP_015623806.1 U-box domain-containing protein 21 [Oryza sativa Japonica Group]	-	-	GO:0004842//ubiquitin-protein transferase activity;GO:0005515//protein binding;GO:0008270//zinc ion binding	GO:0016567//protein ubiquitination
SK1G00070887	0.969	2.01667	1.0574	2.61551e-08	2.17866e-07	--	-	-	-	XP_015613047.1 formin-like protein 1 [Oryza sativa Japonica Group]	-	-	-	-
SK1G00061743	4.78	2.02733	-1.23743	2.65887e-08	2.21159e-07	--	-	-	-	XP_015645139.1 uncharacterized protein LOC4343589 [Oryza sativa Japonica Group]	-	-	-	-
MSTRG.13771	0.146	0.754	2.3686	2.73674e-08	2.2731e-07	--	-	-	-	Zinc knuckle family protein [Oryza sativa Japonica Group]	-	-	-	-
SK1G00044694	0.932	2.47833	1.41097	2.80038e-08	2.32328e-07	At5g66560	-	-	-	BAS86293.1 Os03g0738900 [Oryza sativa Japonica Group]	-	-	GO:0003700//transcription factor activity, sequence-specific DNA binding;GO:0005515//protein binding	GO:0006355//regulation of transcription, DNA-templated
SK1G00045709	0.897	2.423	1.43361	2.81829e-08	2.33747e-07	SD18	-	-	-	EAY90640.1 hypothetical protein OsI_12243 [Oryza sativa Indica Group]	-	-	GO:0004672//protein kinase activity;GO:0004674//protein serine/threonine kinase activity;GO:0005524//ATP binding	GO:0006468//protein phosphorylation;GO:0048544//recognition of pollen
SK1G00048546	4.548	1.149	-1.98485	2.83757e-08	2.35077e-07	--	-	-	-	EAY87598.1 hypothetical protein OsI_09009 [Oryza sativa Indica Group]	-	-	-	-
SK1G00056983	0.177	0.851667	2.26654	2.8602e-08	2.36816e-07	AAO	Metabolism;Metabolism	Global and overview maps;Carbohydrate metabolism	K00423;K00423	XP_015641225.1 L-ascorbate oxidase [Oryza sativa Japonica Group]	ko01100//Metabolic pathways;ko00053//Ascorbate and aldarate metabolism	-	GO:0005375//copper ion transmembrane transporter activity;GO:0005507//copper ion binding;GO:0016491//oxidoreductase activity;GO:0050304//nitrous-oxide reductase activity	GO:0006825//copper ion transport;GO:0019333//denitrification pathway;GO:0055114//oxidation-reduction process
SK1G00055060	0.069	0.488	2.82221	2.89324e-08	2.39277e-07	--	-	-	-	BAS95772.1 Os06g0108900, partial [Oryza sativa Japonica Group]	-	-	-	-
MSTRG.4796	0.039	0.928333	4.5731	2.96709e-08	2.44952e-07	--	-	-	-	Os10g0570001 [Oryza sativa Japonica Group]	-	-	-	-
SK1G00041343	1.577	4.37467	1.47199	3.05613e-08	2.51526e-07	PIN3A	-	-	-	XP_015625677.1 auxin efflux carrier component 3a isoform X1 [Oryza sativa Japonica Group]	-	GO:0016021//integral component of membrane	-	GO:0055085//transmembrane transport
SK1G00060547	25.946	8.15333	-1.67005	3.11022e-08	2.55614e-07	--	-	-	-	EEC79660.1 hypothetical protein OsI_20903 [Oryza sativa Indica Group]	-	-	-	-
SK1G00059539	0.063	0.557667	3.14598	3.32281e-08	2.71773e-07	PCS1	-	-	-	EAY97867.1 hypothetical protein OsI_19787 [Oryza sativa Indica Group]	-	-	-	-
SK1G00060031	21.266	10.482	-1.02063	3.38697e-08	2.76786e-07	ESK1	-	-	-	EEC79381.1 hypothetical protein OsI_20293 [Oryza sativa Indica Group]	-	-	-	-
SK1G00040234	6.471	2.199	-1.55714	3.39808e-08	2.77616e-07	EXPA2	-	-	-	XP_015625064.1 expansin-A2 [Oryza sativa Japonica Group]	-	-	-	-
SK1G00066658	1.005	2.03467	1.0176	3.40057e-08	2.77741e-07	--	-	-	-	EAY93129.1 hypothetical protein OsI_14935 [Oryza sativa Indica Group]	-	-	GO:0005515//protein binding	-
SK1G00073911	17.178	38.709	1.17211	3.58426e-08	2.91591e-07	WRKY62	-	-	-	XP_015610755.1 WRKY transcription factor WRKY62 [Oryza sativa Japonica Group]	-	-	GO:0003700//transcription factor activity, sequence-specific DNA binding;GO:0043565//sequence-specific DNA binding	GO:0006355//regulation of transcription, DNA-templated
SK1G00039834	1.087	2.73533	1.33136	3.85308e-08	3.11184e-07	20ox2	-	-	-	BAK39011.1 gibberellin-20 oxidase-2 [Oryza rufipogon]	-	-	GO:0016491//oxidoreductase activity	GO:0055114//oxidation-reduction process
SK1G00040245	45.354	15.4557	-1.55309	3.88052e-08	3.13258e-07	WRKY62	-	-	-	EAY76304.1 hypothetical protein OsI_04239 [Oryza sativa Indica Group]	-	-	GO:0003700//transcription factor activity, sequence-specific DNA binding;GO:0043565//sequence-specific DNA binding	GO:0006355//regulation of transcription, DNA-templated
SK1G00059307	5.652	11.862	1.06951	3.88093e-08	3.13258e-07	--	-	-	-	XP_015637577.1 uncharacterized protein LOC4338473 [Oryza sativa Japonica Group]	-	-	-	-
SK1G00074849	3.195	1.205	-1.40678	3.89101e-08	3.13896e-07	At1g63430	-	-	-	EEC78280.1 hypothetical protein OsI_17977 [Oryza sativa Indica Group]	-	-	GO:0004672//protein kinase activity;GO:0005515//protein binding;GO:0005524//ATP binding	GO:0006468//protein phosphorylation
MSTRG.2172	0.026	1.79233	6.10718	3.93858e-08	3.16976e-07	--	-	-	-	Similar to NBS-LRR disease resistance protein homologue [Oryza sativa Japonica Group]	-	-	-	-
SK1G00044620	0.273	0.672333	1.30028	4.00416e-08	3.21322e-07	BHLH84	-	-	-	XP_015631804.1 transcription factor BHLH089-like isoform X1 [Oryza sativa Japonica Group]	-	-	GO:0046983//protein dimerization activity	-
SK1G00060028	0.02	0.257667	3.68743	4.03611e-08	3.23437e-07	PDC1	Metabolism;Metabolism;Metabolism	Global and overview maps;Global and overview maps;Carbohydrate metabolism	K01568;K01568;K01568	A2Y5L9.1 RecName: Full=Pyruvate decarboxylase 1; Short=PDC [Oryza sativa Indica Group]	ko01100//Metabolic pathways;ko01110//Biosynthesis of secondary metabolites;ko00010//Glycolysis / Gluconeogenesis	GO:0005948//acetolactate synthase complex	GO:0000287//magnesium ion binding;GO:0003824//catalytic activity;GO:0003984//acetolactate synthase activity;GO:0008949//oxalyl-CoA decarboxylase activity;GO:0009028//tartronate-semialdehyde synthase activity;GO:0016823//hydrolase activity, acting on acid carbon-carbon bonds, in ketonic substances;GO:0030976//thiamine pyrophosphate binding;GO:0033980//phosphonopyruvate decarboxylase activity;GO:00…	GO:0006113//fermentation;GO:0009097//isoleucine biosynthetic process;GO:0009099//valine biosynthetic process;GO:0009234//menaquinone biosynthetic process;GO:0009444//pyruvate oxidation;GO:0009636//response to toxic substance;GO:0009684//indoleacetic acid biosynthetic process;GO:0017000//antibiotic biosynthetic process;GO:0019310//inositol catabolic process;GO:0019385//methanogenesis, from acetate…
MSTRG.9226	1.487	0.567667	-1.38929	4.07615e-08	3.26465e-07	--	-	-	-	hypothetical protein OsI_11557 [Oryza sativa Indica Group]	-	-	-	-
SK1G00052672	0.04	0.237667	2.57087	4.08791e-08	3.27316e-07	At1g56140	-	-	-	KAF2933230.1 hypothetical protein DAI22_04g066200, partial [Oryza sativa Japonica Group]	-	GO:0016020//membrane	GO:0004672//protein kinase activity;GO:0005515//protein binding;GO:0005524//ATP binding	GO:0006468//protein phosphorylation;GO:0006865//amino acid transport
SK1G00073967	0.345	0.0406667	-3.08468	4.12044e-08	3.29647e-07	SBT1.8	-	-	-	XP_015610765.1 subtilisin-like protease SBT1.8 [Oryza sativa Japonica Group]	-	-	GO:0008236//serine-type peptidase activity	GO:0006508//proteolysis;GO:0009306//protein secretion
SK1G00042586	6.503	3.107	-1.06558	4.16789e-08	3.33075e-07	--	-	-	-	XP_015632143.1 uncharacterized protein LOC4323902 [Oryza sativa Japonica Group]	-	-	GO:0008270//zinc ion binding	-
SK1G00055728	45.206	18.357	-1.30018	4.24558e-08	3.38348e-07	RIPK	-	-	-	KAF0902562.1 hypothetical protein E2562_018058 [Oryza meyeriana var. granulata] [Oryza meyeriana]	-	-	GO:0004672//protein kinase activity;GO:0005524//ATP binding	GO:0006468//protein phosphorylation
SK1G00070347	21.366	44.0747	1.04463	4.25606e-08	3.39089e-07	NAT3	-	-	-	XP_015620184.1 nucleobase-ascorbate transporter 3 isoform X1 [Oryza sativa Japonica Group]	-	GO:0016020//membrane;GO:0016021//integral component of membrane	GO:0015205//nucleobase transmembrane transporter activity;GO:0022857//transmembrane transporter activity;GO:0042907//xanthine transmembrane transporter activity	GO:0015851//nucleobase transport;GO:0042906//xanthine transport;GO:0055085//transmembrane transport
SK1G00050902	2.699	5.855	1.11724	4.30693e-08	3.42482e-07	ATL6	-	-	-	KAB8086665.1 hypothetical protein EE612_010111 [Oryza sativa]	-	GO:0000109//nucleotide-excision repair complex;GO:0005680//anaphase-promoting complex	GO:0008270//zinc ion binding;GO:0046872//metal ion binding;GO:0061630//ubiquitin protein ligase activity;GO:0097602//cullin family protein binding	GO:0006289//nucleotide-excision repair;GO:0031145//anaphase-promoting complex-dependent proteasomal ubiquitin-dependent protein catabolic process
SK1G00052259	2.067	0.877667	-1.23579	4.31916e-08	3.43266e-07	At4g34880	Metabolism;Metabolism;Metabolism;Metabolism	Global and overview maps;Amino acid metabolism;Amino acid metabolism;Amino acid metabolism	K01426;K01426;K01426;K01426	EEC76850.1 hypothetical protein OsI_15015 [Oryza sativa Indica Group]	ko01100//Metabolic pathways;ko00380//Tryptophan metabolism;ko00330//Arginine and proline metabolism;ko00360//Phenylalanine metabolism	GO:0030956//glutamyl-tRNA(Gln) amidotransferase complex	GO:0004039//allophanate hydrolase activity;GO:0016811//hydrolase activity, acting on carbon-nitrogen (but not peptide) bonds, in linear amides;GO:0050567//glutaminyl-tRNA synthase (glutamine-hydrolyzing) activity	GO:0006424//glutamyl-tRNA aminoacylation;GO:0019627//urea metabolic process
SK1G00045821	1.458	0.446333	-1.7078	4.3402e-08	3.44749e-07	--	-	-	-	AAX96502.1 Transposable element protein, putative [Oryza sativa Japonica Group]	-	-	GO:0004496//mevalonate kinase activity	GO:0016126//sterol biosynthetic process;GO:0019287//isopentenyl diphosphate biosynthetic process, mevalonate pathway
SK1G00055951	5.289	2.08733	-1.34133	4.39757e-08	3.48922e-07	--	-	-	-	EAZ00311.1 hypothetical protein OsI_22328 [Oryza sativa Indica Group]	-	-	-	-
SK1G00060754	1.181	0.228333	-2.3708	4.44083e-08	3.51968e-07	--	-	-	-	XP_015638364.1 uncharacterized protein LOC4339731 [Oryza sativa Japonica Group]	-	-	-	-
SK1G00070848	65.78	28.4323	-1.21012	4.44634e-08	3.52212e-07	EXPB3	-	-	-	XP_015612911.1 expansin-B3 [Oryza sativa Japonica Group]	-	-	-	-
SK1G00061725	3.005	1.46133	-1.04008	4.5021e-08	3.56141e-07	CYCD6-1	-	-	-	XP_015645356.1 cyclin-D6-1 isoform X1 [Oryza sativa Japonica Group]	-	-	-	-
SK1G00061708	2.341	0.749667	-1.6428	4.51211e-08	3.56835e-07	CSFL8	-	-	-	EEC82244.1 hypothetical protein OsI_26423 [Oryza sativa Indica Group]	-	GO:0016020//membrane	GO:0008375//acetylglucosaminyltransferase activity;GO:0016760//cellulose synthase (UDP-forming) activity	GO:0030244//cellulose biosynthetic process;GO:0042710//biofilm formation
SK1G00047497	165.985	65.8157	-1.33455	4.55611e-08	3.59823e-07	--	-	-	-	-	-	-	-	-
SK1G00047837	0.561	1.89867	1.75891	4.63632e-08	3.65958e-07	HIPP30	-	-	-	XP_015628826.1 heavy metal-associated isoprenylated plant protein 30 [Oryza sativa Japonica Group]	-	-	GO:0005507//copper ion binding;GO:0045340//mercury ion binding;GO:0046872//metal ion binding	GO:0006825//copper ion transport;GO:0015694//mercury ion transport
SK1G00050094	2.561	6.78067	1.40472	4.64193e-08	3.66301e-07	--	-	-	-	-	-	-	-	-
SK1G00047458	14.973	4.17967	-1.8409	4.68787e-08	3.69277e-07	FLZ14	-	-	-	EAY88806.1 hypothetical protein OsI_10279 [Oryza sativa Indica Group]	-	-	-	-
SK1G00064625	0.828	0.386	-1.10103	4.73498e-08	3.72425e-07	SUVH5	Metabolism;Metabolism	Global and overview maps;Amino acid metabolism	K11420;K11420	XP_015648096.1 uncharacterized protein LOC4345509 [Oryza sativa Japonica Group]	ko01100//Metabolic pathways;ko00310//Lysine degradation	GO:0005634//nucleus	GO:0005515//protein binding;GO:0008270//zinc ion binding;GO:0018024//histone-lysine N-methyltransferase activity	GO:0034968//histone lysine methylation
SK1G00048672	35.846	13.0213	-1.46093	4.78722e-08	3.76124e-07	GATL9	-	-	-	EAZ24557.1 hypothetical protein OsJ_08319 [Oryza sativa Japonica Group]	-	-	GO:0016757//transferase activity, transferring glycosyl groups	-
SK1G00041302	0.429	0.0773333	-2.47182	4.83056e-08	3.7922e-07	At1g28600	-	-	-	EAY75193.1 hypothetical protein OsI_03085 [Oryza sativa Indica Group]	-	-	GO:0016788//hydrolase activity, acting on ester bonds	-
SK1G00056875	3.002	0.979333	-1.61605	4.8976e-08	3.8417e-07	--	-	-	-	EEC80803.1 hypothetical protein OsI_23349 [Oryza sativa Indica Group]	-	-	-	-
SK1G00057369	0.66	1.609	1.28563	4.93798e-08	3.87022e-07	HAK10	-	-	-	XP_015643706.1 pentatricopeptide repeat-containing protein At4g16470 [Oryza sativa Japonica Group]	-	GO:0016020//membrane	GO:0015079//potassium ion transmembrane transporter activity	GO:0006813//potassium ion transport;GO:0071805//potassium ion transmembrane transport
SK1G00059609	1.813	0.377	-2.26574	5.05852e-08	3.95613e-07	--	-	-	-	KAB8099324.1 hypothetical protein EE612_029325 [Oryza sativa]	-	-	-	-
SK1G00074636	1.411	0.662333	-1.09109	5.08993e-08	3.97746e-07	ATX2	-	-	-	XP_015651374.1 uncharacterized protein LOC4347822 isoform X2 [Oryza sativa Japonica Group]	-	-	GO:0005515//protein binding	-
SK1G00063353	6.218	2.23967	-1.47317	5.41175e-08	4.20961e-07	SD25	-	-	-	XP_015645378.1 G-type lectin S-receptor-like serine/threonine-protein kinase SD2-5 [Oryza sativa Japonica Group]	-	GO:0019031//viral envelope	GO:0004672//protein kinase activity;GO:0005524//ATP binding	GO:0006468//protein phosphorylation
SK1G00070589	3.548	7.996	1.17227	5.6739e-08	4.39579e-07	YAB6	-	-	-	XP_015618575.1 protein YABBY 6 [Oryza sativa Japonica Group]	-	-	-	GO:0007275//multicellular organism development
SK1G00044601	1.11	2.42067	1.12484	5.68144e-08	4.40045e-07	rmt2	-	-	-	AAK63943.1 putative methyltransferase [Oryza sativa Japonica Group]	-	-	GO:0005515//protein binding;GO:0008168//methyltransferase activity	-
SK1G00044998	20.144	9.33133	-1.1102	5.70341e-08	4.41392e-07	GGP3	-	-	-	XP_015628523.1 gamma-glutamyl peptidase 3 [Oryza sativa Japonica Group]	-	GO:0005951//carbamoyl-phosphate synthase complex	GO:0000107//imidazoleglycerol-phosphate synthase activity;GO:0003824//catalytic activity;GO:0003922//GMP synthase (glutamine-hydrolyzing) activity;GO:0004088//carbamoyl-phosphate synthase (glutamine-hydrolyzing) activity;GO:0004642//phosphoribosylformylglycinamidine synthase activity;GO:0008899//homoserine O-succinyltransferase activity;GO:0016787//hydrolase activity;GO:0016884//carbon-nitrogen l…	GO:0000105//histidine biosynthetic process;GO:0006177//GMP biosynthetic process;GO:0009086//methionine biosynthetic process;GO:0009152//purine ribonucleotide biosynthetic process;GO:0009220//pyrimidine ribonucleotide biosynthetic process
SK1G00046054	10.127	25.4763	1.33095	5.76576e-08	4.46098e-07	At1g74360	-	-	-	EAY90368.1 hypothetical protein OsI_11946 [Oryza sativa Indica Group]	-	-	GO:0005515//protein binding	-
SK1G00073846	8.742	4.09933	-1.09257	5.93382e-08	4.58488e-07	GL1-1	-	-	-	XP_015651446.1 protein ECERIFERUM 3 [Oryza sativa Japonica Group]	-	-	GO:0004316//3-oxoacyl-[acyl-carrier-protein] reductase (NADPH) activity;GO:0005506//iron ion binding;GO:0016491//oxidoreductase activity	GO:0006633//fatty acid biosynthetic process;GO:0008610//lipid biosynthetic process;GO:0055114//oxidation-reduction process
SK1G00061519	3.836	1.65167	-1.21568	5.94687e-08	4.59374e-07	--	-	-	-	XP_015645821.1 zinc finger CCCH domain-containing protein 18 [Oryza sativa Japonica Group]	-	-	-	-
SK1G00060092	7.018	3.47167	-1.01543	6.07893e-08	4.68199e-07	At5g58300	-	-	-	XP_015639271.1 probable inactive receptor kinase At5g58300 [Oryza sativa Japonica Group]	-	GO:0042470//melanosome	GO:0004672//protein kinase activity;GO:0005515//protein binding;GO:0005524//ATP binding	GO:0006468//protein phosphorylation
SK1G00041601	171.233	57.136	-1.58349	6.1373e-08	4.72192e-07	AVT1I	-	-	-	BAD53416.1 amino acid transporter-like [Oryza sativa Japonica Group]	-	-	GO:0003824//catalytic activity	GO:0003333//amino acid transmembrane transport
SK1G00055908	1.792	0.463667	-1.95041	6.15312e-08	4.73283e-07	GATL9	-	-	-	XP_015641936.1 probable galacturonosyltransferase-like 9 [Oryza sativa Japonica Group]	-	-	GO:0016757//transferase activity, transferring glycosyl groups	-
SK1G00051380	0.808	2.032	1.33047	6.21927e-08	4.77641e-07	--	-	-	-	EAY84563.1 hypothetical protein OsI_05934 [Oryza sativa Indica Group]	-	-	GO:0005515//protein binding	-
SK1G00069084	825.942	289.105	-1.51445	6.25064e-08	4.79508e-07	At1g77060	-	-	-	EAY82504.1 hypothetical protein OsI_37721 [Oryza sativa Indica Group]	-	-	GO:0004451//isocitrate lyase activity;GO:0008807//carboxyvinyl-carboxyphosphonate phosphorylmutase activity;GO:0033978//phosphonopyruvate hydrolase activity;GO:0046421//methylisocitrate lyase activity;GO:0050188//phosphoenolpyruvate mutase activity	GO:0006099//tricarboxylic acid cycle;GO:0019629//propionate catabolic process, 2-methylcitrate cycle;GO:0019634//organic phosphonate metabolic process;GO:0019752//carboxylic acid metabolic process
SK1G00054025	1.674	5.19833	1.63475	6.47641e-08	4.95907e-07	MIA40	-	-	-	XP_015636074.1 mitochondrial intermembrane space import and assembly protein 40 homolog [Oryza sativa Japonica Group]	-	-	-	-
SK1G00060617	36.506	15.4753	-1.23816	6.66277e-08	5.08696e-07	FLA9	-	-	-	OEL30686.1 Fasciclin-like arabinogalactan protein 13 [Dichanthelium oligosanthes]	-	-	-	-
SK1G00071171	23.96	6.86033	-1.80428	6.70385e-08	5.11657e-07	NHL6	-	-	-	EAY79014.1 hypothetical protein OsI_34123 [Oryza sativa Indica Group]	-	-	-	-
[truncated: 1,442 more rows]
