# Supplementary material for: Multiomics analysis of the molecular and single-cell responses of rice after deep-space flight on Chang'e-5
Source: Research Square preprint supplement (doi:10.21203/rs.3.rs-7211908/v1), 2025-08-22
Supplement: Supplementary file 2 [file 1e62e9560c7cfcd3077dba30.xlsx]

## Sheet: Supplementary Data 6
Supplementary Data 6. Combined analysis of 9 quadrants by MeRip and RNA-seq.
Gene id	Peak id	Quadrant	Gene_diff	RNA_CK1_count	RNA_CK2_count	RNA_CK3_count	RNA_CK4_count	RNA_CK5_count	RNA_CK6_count	RNA_CK7_count	RNA_CK8_count	RNA_CK9_count	RNA_CK10_count	RNA_TK1_count	RNA_TK2_count	RNA_TK3_count	RNA_TK4_count	RNA_TK5_count	RNA_TK6_count	RNA_TK7_count	RNA_TK8_count	RNA_TK9_count	RNA_TK10_count	RNA_TK11_count	RNA_TK12_count	RNA_TK13_count	RNA_TK14_count	RNA_TK15_count	RNA_TK16_count	RNA_TK17_count	RNA_TK18_count	RNA_TK19_count	RNA_TK20_count	RNA_TK21_count	RNA_TK22_count	RNA_TK23_count	RNA_TK24_count	RNA_TK25_count	RNA_TK26_count	RNA_TK27_count	RNA_TK28_count	RNA_TK29_count	RNA_TK30_count	RNA_CK1_fpkm	RNA_CK2_fpkm	RNA_CK3_fpkm	RNA_CK4_fpkm	RNA_CK5_fpkm	RNA_CK6_fpkm
SK1G00000507	MergePeak_479	quadrant6	no	2	0	0	0	2	0	0	0	0	0	0	0	0	0	0	0	0	0	0	0	2	0	0	1	0	1	4	0	0	0	0	0	0	1	0	0	0	2	0	0	0.56	0	0	0	0.61	0
SK1G00001503	MergePeak_1288	quadrant5	no	0	0	0	0	0	0	0	0	0	2	2	0	0	0	0	0	0	0	1	0	0	0	0	0	0	0	0	0	0	0	0	0	0	0	0	0	0	0	0	1	0	0	0	0	0	0
SK1G00003489	MergePeak_2716	quadrant8	no	2	22	2	3	2	0	2	1	8	5	0	1	3	2	9	0	1	3	0	1	1	0	4	2	1	4	1	0	1	0	1	0	0	0	2	0	0	1	2	4	0.09	1.06	0.1	0.15	0.09	0
SK1G00004597	MergePeak_3472	quadrant2	no	0	0	0	0	0	0	0	0	0	0	0	0	0	0	0	0	0	0	0	0	0	0	0	0	0	1	0	0	0	0	0	0	0	0	0	0	0	0	0	0	0	0	0	0	0	0
SK1G00004707	MergePeak_3533	quadrant5	no	1747	1402	1822	1451	1621	1249	1475	1435	1668	1602	1557	1931	2049	1732	1654	2593	2150	2489	1889	2253	1941	2112	3171	3140	2743	3524	3097	2764	2933	3122	3308	2723	3579	2633	3529	3765	3611	4119	4222	3659	30.97	27.91	38.04	29.28	31.41	24.35
SK1G00004707	MergePeak_3534	quadrant5	no	1747	1402	1822	1451	1621	1249	1475	1435	1668	1602	1557	1931	2049	1732	1654	2593	2150	2489	1889	2253	1941	2112	3171	3140	2743	3524	3097	2764	2933	3122	3308	2723	3579	2633	3529	3765	3611	4119	4222	3659	30.97	27.91	38.04	29.28	31.41	24.35
SK1G00005210	MergePeak_8029	quadrant4	no	1	0	0	0	0	0	0	0	0	0	0	0	0	0	1	0	0	0	0	3	0	0	0	0	0	0	0	0	0	0	0	0	0	0	0	1	1	0	0	0	0.08	0	0	0	0	0
SK1G00005340	MergePeak_8133	quadrant2	no	0	0	0	0	0	0	0	0	0	0	0	0	0	0	0	0	0	0	0	0	0	0	5	0	0	0	0	0	2	0	0	0	0	0	2	0	1	0	0	1	0	0	0	0	0	0
SK1G00005438	MergePeak_8223	quadrant5	no	0	0	0	0	1	0	0	0	0	0	0	0	0	0	0	3	0	0	0	0	0	1	1	0	0	0	0	0	0	0	0	0	1	0	0	0	0	0	1	1	0	0	0	0	0.11	0
SK1G00005755	MergePeak_8545	quadrant5	no	527	248	456	295	494	333	400	396	363	357	421	468	637	775	555	967	792	685	439	824	493	714	732	873	387	550	334	499	738	623	653	718	688	759	555	944	544	599	776	609	4.89	2.58	4.98	3.11	5.01	3.4
SK1G00005755	MergePeak_8546	quadrant5	no	527	248	456	295	494	333	400	396	363	357	421	468	637	775	555	967	792	685	439	824	493	714	732	873	387	550	334	499	738	623	653	718	688	759	555	944	544	599	776	609	4.89	2.58	4.98	3.11	5.01	3.4
SK1G00005755	MergePeak_8547	quadrant5	no	527	248	456	295	494	333	400	396	363	357	421	468	637	775	555	967	792	685	439	824	493	714	732	873	387	550	334	499	738	623	653	718	688	759	555	944	544	599	776	609	4.89	2.58	4.98	3.11	5.01	3.4
SK1G00005755	MergePeak_8548	quadrant5	no	527	248	456	295	494	333	400	396	363	357	421	468	637	775	555	967	792	685	439	824	493	714	732	873	387	550	334	499	738	623	653	718	688	759	555	944	544	599	776	609	4.89	2.58	4.98	3.11	5.01	3.4
SK1G00005755	MergePeak_8549	quadrant5	no	527	248	456	295	494	333	400	396	363	357	421	468	637	775	555	967	792	685	439	824	493	714	732	873	387	550	334	499	738	623	653	718	688	759	555	944	544	599	776	609	4.89	2.58	4.98	3.11	5.01	3.4
SK1G00010395	MergePeak_12346	quadrant5	no	32	27	30	25	37	24	21	20	43	29	16	26	33	47	32	42	25	56	31	46	41	46	59	57	56	41	42	58	40	52	43	51	69	60	59	65	73	46	62	99	1.62	1.54	1.79	1.44	2.05	1.34
SK1G00010455	MergePeak_12411	quadrant5	no	17	14	10	11	3	17	16	11	18	9	2	9	19	14	15	10	18	12	11	15	9	15	17	10	32	18	18	16	8	13	15	12	16	13	14	25	17	20	11	28	1.98	1.83	1.37	1.46	0.38	2.18
SK1G00012112	MergePeak_13608	quadrant2	no	2	3	3	4	3	1	3	0	1	4	3	2	6	10	4	5	2	3	3	11	9	12	9	6	5	3	10	3	5	7	7	2	7	7	6	9	5	3	10	6	0.18	0.3	0.32	0.41	0.29	0.1
SK1G00012394	MergePeak_13801	quadrant8	no	0	0	0	0	0	0	0	0	1	0	0	0	0	0	0	0	0	0	0	0	0	0	1	0	0	0	0	0	0	0	0	0	1	0	0	0	0	0	0	0	0	0	0	0	0	0
SK1G00012635	MergePeak_13966	quadrant8	no	1	0	0	0	0	0	0	0	0	0	0	0	0	0	0	0	0	0	0	0	0	0	0	0	0	0	0	0	0	0	0	0	1	0	0	0	0	0	0	0	0.21	0	0	0	0	0
SK1G00012661	MergePeak_13991	quadrant5	no	0	0	0	0	0	0	0	0	0	0	0	0	0	1	0	0	0	0	0	0	0	0	0	0	0	0	0	0	0	0	0	0	0	0	0	0	0	0	0	1	0	0	0	0	0	0
SK1G00014410	MergePeak_15198	quadrant5	no	3	4	2	3	3	4	7	5	4	4	2	3	5	1	2	6	6	4	1	3	4	3	4	3	1	10	6	6	7	2	4	5	9	4	5	2	5	3	8	6	0.13	0.19	0.1	0.14	0.14	0.18
SK1G00014490	MergePeak_15231	quadrant5	no	8	3	7	3	11	6	8	10	7	11	6	10	12	21	10	7	23	10	10	16	10	5	13	8	16	8	11	10	9	11	18	14	9	13	12	14	13	10	11	11	0.24	0.1	0.25	0.1	0.36	0.2
SK1G00015456	MergePeak_15812	quadrant5	no	4	5	5	3	3	8	8	13	5	3	9	1	8	4	3	5	4	13	11	4	7	4	2	1	2	5	3	11	5	3	4	4	9	4	3	10	9	7	4	7	0.29	0.4	0.42	0.25	0.24	0.63
SK1G00016873	MergePeak_16933	quadrant5	no	86	33	91	102	101	78	144	90	111	116	71	146	162	97	78	181	133	161	84	143	119	84	115	77	54	101	85	97	77	117	105	112	108	74	95	99	189	114	146	88	0.96	0.41	1.2	1.3	1.23	0.96
SK1G00016873	MergePeak_16934	quadrant5	no	86	33	91	102	101	78	144	90	111	116	71	146	162	97	78	181	133	161	84	143	119	84	115	77	54	101	85	97	77	117	105	112	108	74	95	99	189	114	146	88	0.96	0.41	1.2	1.3	1.23	0.96
SK1G00016873	MergePeak_16935	quadrant5	no	86	33	91	102	101	78	144	90	111	116	71	146	162	97	78	181	133	161	84	143	119	84	115	77	54	101	85	97	77	117	105	112	108	74	95	99	189	114	146	88	0.96	0.41	1.2	1.3	1.23	0.96
SK1G00017527	MergePeak_20965	quadrant5	no	377	816	334	644	508	611	542	439	427	319	341	426	639	464	528	461	521	509	501	402	449	367	611	451	420	574	584	361	443	435	348	347	372	358	307	506	497	547	429	578	8.85	21.52	9.24	17.21	13.04	15.78
SK1G00017527	MergePeak_20966	quadrant5	no	377	816	334	644	508	611	542	439	427	319	341	426	639	464	528	461	521	509	501	402	449	367	611	451	420	574	584	361	443	435	348	347	372	358	307	506	497	547	429	578	8.85	21.52	9.24	17.21	13.04	15.78
SK1G00018615	MergePeak_21576	quadrant2	no	0	1	0	0	1	0	0	0	0	0	0	0	1	1	1	0	1	0	0	0	0	0	0	2	0	3	2	2	0	0	2	0	0	0	0	2	2	2	0	0	0	0.16	0	0	0.15	0
SK1G00018894	MergePeak_21783	quadrant5	no	0	0	1	1	2	1	0	0	0	1	0	3	0	0	1	1	0	0	0	1	0	2	0	0	2	0	1	3	2	0	5	3	3	0	1	1	0	1	0	3	0	0	0.08	0.07	0.14	0.07
SK1G00019782	MergePeak_22478	quadrant5	no	2	0	2	0	3	6	3	0	5	0	3	2	2	4	3	2	2	0	3	0	3	2	2	1	2	0	0	1	1	1	3	1	1	4	5	4	0	3	5	4	0.63	0	0.74	0	1.03	2.07
SK1G00021601	MergePeak_19381	quadrant2	no	0	0	0	0	0	0	0	0	0	0	0	0	0	0	0	0	0	2	0	0	0	0	0	0	0	0	0	1	0	0	0	0	0	0	0	0	0	0	0	0	0	0	0	0	0	0
SK1G00021822	MergePeak_19521	quadrant5	no	27	20	25	23	24	13	34	20	14	18	17	17	32	23	24	23	20	23	19	12	16	15	25	18	13	20	13	24	37	16	32	23	41	32	31	32	27	25	23	28	4.82	4.01	5.26	4.67	4.68	2.55
SK1G00022073	MergePeak_19689	quadrant5	no	0	0	0	0	0	0	0	0	0	0	0	0	0	0	0	0	0	0	0	0	0	0	0	0	0	0	0	0	0	0	0	0	0	0	0	0	0	0	0	0	0	0	0	0	0	0
SK1G00022766	MergePeak_20079	quadrant5	no	100	61	50	56	74	77	128	103	70	58	96	58	83	109	81	94	110	89	92	113	119	122	226	152	142	235	143	175	178	114	109	127	128	137	199	182	169	223	176	210	3.81	2.61	2.25	2.43	3.09	3.23
SK1G00022766	MergePeak_20080	quadrant5	no	100	61	50	56	74	77	128	103	70	58	96	58	83	109	81	94	110	89	92	113	119	122	226	152	142	235	143	175	178	114	109	127	128	137	199	182	169	223	176	210	3.81	2.61	2.25	2.43	3.09	3.23
SK1G00022766	MergePeak_20081	quadrant5	no	100	61	50	56	74	77	128	103	70	58	96	58	83	109	81	94	110	89	92	113	119	122	226	152	142	235	143	175	178	114	109	127	128	137	199	182	169	223	176	210	3.81	2.61	2.25	2.43	3.09	3.23
SK1G00022766	MergePeak_20082	quadrant5	no	100	61	50	56	74	77	128	103	70	58	96	58	83	109	81	94	110	89	92	113	119	122	226	152	142	235	143	175	178	114	109	127	128	137	199	182	169	223	176	210	3.81	2.61	2.25	2.43	3.09	3.23
SK1G00022766	MergePeak_20083	quadrant5	no	100	61	50	56	74	77	128	103	70	58	96	58	83	109	81	94	110	89	92	113	119	122	226	152	142	235	143	175	178	114	109	127	128	137	199	182	169	223	176	210	3.81	2.61	2.25	2.43	3.09	3.23
SK1G00023146	MergePeak_20387	quadrant5	no	0	0	0	0	0	1	0	0	0	0	0	0	0	1	0	0	0	0	0	0	0	0	0	0	0	1	0	2	1	0	1	0	0	0	0	0	0	0	0	0	0	0	0	0	0	0.13
SK1G00024826	MergePeak_23921	quadrant5	no	2	0	1	1	1	1	0	0	1	0	1	0	0	0	1	2	0	1	0	0	0	0	0	2	0	3	0	1	1	1	0	1	0	0	2	4	3	1	0	1	0.15	0	0.09	0.09	0.08	0.08
SK1G00025587	MergePeak_24336	quadrant2	no	0	0	0	0	0	0	0	0	0	0	0	0	0	2	0	0	0	0	0	0	1	0	1	0	0	1	0	0	0	0	0	0	1	0	0	1	0	0	0	0	0	0	0	0	0	0
SK1G00027168	MergePeak_25437	quadrant5	no	2	0	0	0	0	0	0	0	0	2	0	0	0	0	1	1	0	0	0	0	0	0	2	0	0	0	1	2	2	0	1	1	0	1	0	1	0	0	0	1	0.26	0	0	0	0	0
SK1G00027768	MergePeak_25731	quadrant2	no	1	0	0	1	1	0	2	0	0	0	0	0	3	2	5	3	0	2	0	0	3	0	2	4	0	2	0	0	2	0	0	0	1	1	4	0	0	0	3	1	0.2	0	0	0.22	0.21	0
SK1G00028491	MergePeak_26135	quadrant2	no	0	0	0	0	2	3	0	1	0	0	0	2	1	2	0	4	0	0	0	1	3	3	5	0	0	1	4	1	4	0	3	5	2	0	3	1	2	1	3	3	0	0	0	0	0.21	0.31
SK1G00028534	MergePeak_26157	quadrant5	no	1	6	5	0	2	8	4	3	1	10	10	7	7	6	8	6	6	10	2	7	8	7	2	5	0	1	1	2	8	5	14	6	2	7	11	10	6	4	6	11	0.06	0.43	0.37	0	0.14	0.56
SK1G00028676	MergePeak_26241	quadrant5	no	13	7	7	2	3	6	5	3	17	5	12	4	7	5	3	6	7	9	3	15	6	7	3	2	7	1	10	6	11	13	5	9	4	8	8	3	11	4	8	7	0.65	0.4	0.41	0.11	0.16	0.33
SK1G00030237	MergePeak_17624	quadrant5	no	61	51	34	28	37	37	36	41	41	38	36	58	36	19	19	68	44	38	44	32	36	36	51	36	2	25	31	46	40	30	21	35	25	43	30	35	33	28	42	35	3.06	2.87	2.01	1.6	2.03	2.04
SK1G00030237	MergePeak_17625	quadrant5	no	61	51	34	28	37	37	36	41	41	38	36	58	36	19	19	68	44	38	44	32	36	36	51	36	2	25	31	46	40	30	21	35	25	43	30	35	33	28	42	35	3.06	2.87	2.01	1.6	2.03	2.04
SK1G00031830	MergePeak_3737	quadrant5	no	0	0	0	0	0	0	0	0	0	0	0	0	0	0	0	0	0	0	0	0	0	0	0	0	0	0	0	0	0	0	0	0	0	0	0	0	0	0	0	0	0	0	0	0	0	0
SK1G00031860	MergePeak_3753	quadrant2	no	0	0	0	0	0	0	0	0	0	0	0	0	0	0	0	0	0	0	0	0	0	0	0	0	0	0	0	0	0	0	0	0	0	0	1	0	0	0	0	0	0	0	0	0	0	0
SK1G00032946	MergePeak_4360	quadrant8	no	0	2	0	0	0	0	0	0	0	0	0	0	0	0	0	0	0	0	0	0	0	0	0	0	0	0	0	0	0	0	0	0	0	2	0	0	0	0	0	0	0	0.14	0	0	0	0
SK1G00032976	MergePeak_4376	quadrant5	no	0	0	1	1	0	1	0	0	0	1	1	1	0	0	0	2	0	1	0	1	0	0	0	0	0	0	0	0	0	0	0	0	2	0	0	3	2	0	0	1	0	0	0.54	0.52	0	0.51
SK1G00033027	MergePeak_4405	quadrant5	no	103	78	52	67	64	78	64	62	42	55	67	56	69	88	67	84	75	50	48	58	51	70	71	78	58	71	52	90	87	102	60	85	76	80	65	92	60	71	70	84	2.67	2.27	1.59	1.98	1.82	2.23
SK1G00034756	MergePeak_5484	quadrant4	no	1	1	0	0	0	0	0	3	0	0	0	0	2	2	0	0	0	0	1	0	0	1	1	1	2	0	0	1	0	2	0	0	0	2	0	1	0	0	0	3	0.16	0.18	0	0	0	0
SK1G00035207	MergePeak_5797	quadrant5	no	0	0	0	2	0	0	0	0	2	0	0	0	3	0	1	0	0	0	1	2	0	0	3	0	0	1	0	0	5	0	0	1	3	0	0	0	0	0	1	1	0	0	0	0.07	0	0
SK1G00035524	MergePeak_5973	quadrant5	no	0	0	0	0	0	0	0	0	0	0	0	0	0	0	0	0	0	0	0	0	0	0	0	0	0	0	0	0	0	0	0	0	0	0	0	0	0	0	0	0	0	0	0	0	0	0
SK1G00035714	MergePeak_6042	quadrant5	no	0	0	0	0	0	0	0	0	3	0	1	1	0	0	0	0	2	0	4	1	2	0	0	0	0	0	0	2	0	0	0	0	2	0	1	0	0	0	1	1	0	0	0	0	0	0
SK1G00036487	MergePeak_6349	quadrant2	no	0	0	0	0	0	0	0	0	0	0	0	0	0	0	0	0	0	0	0	0	0	0	0	0	0	0	0	1	2	0	0	0	0	0	0	0	0	0	0	0	0	0	0	0	0	0
SK1G00036560	MergePeak_6386	quadrant2	no	0	0	0	0	0	0	0	0	0	0	0	0	0	0	0	3	0	0	0	0	0	0	0	0	0	0	0	0	0	0	0	0	0	0	0	0	0	0	0	0	0	0	0	0	0	0
SK1G00036560	MergePeak_6387	quadrant2	no	0	0	0	0	0	0	0	0	0	0	0	0	0	0	0	3	0	0	0	0	0	0	0	0	0	0	0	0	0	0	0	0	0	0	0	0	0	0	0	0	0	0	0	0	0	0
SK1G00036761	MergePeak_6501	quadrant1	no	0	0	0	0	0	0	0	0	0	0	0	0	0	0	0	0	0	0	0	0	0	0	0	0	0	1	0	0	0	0	0	0	0	0	0	0	0	0	0	1	0	0	0	0	0	0
SK1G00036788	MergePeak_6513	quadrant2	no	1	9	3	2	7	19	9	3	8	9	11	23	9	24	5	14	10	23	9	22	20	11	29	14	0	19	18	25	19	15	16	21	14	15	18	20	24	23	31	23	0.08	0.78	0.27	0.18	0.59	1.61
SK1G00037182	MergePeak_6671	quadrant2	no	0	0	0	1	0	0	0	0	0	0	0	0	0	0	0	2	0	0	0	1	0	0	2	0	0	0	0	0	4	0	0	3	2	0	0	0	2	1	1	0	0	0	0	0.15	0	0
SK1G00037791	MergePeak_7018	quadrant2	no	0	0	0	0	0	0	0	0	0	0	0	0	0	0	0	0	0	0	0	0	0	0	0	1	0	0	0	0	0	1	0	0	0	1	0	0	0	0	1	0	0	0	0	0	0	0
SK1G00038357	MergePeak_7497	quadrant5	no	419	316	428	468	424	401	535	498	509	608	521	668	612	579	622	856	900	921	696	759	751	722	1018	668	301	664	580	740	700	681	703	768	841	640	685	893	867	721	1144	728	2.98	2.52	3.58	3.79	3.3	3.14
SK1G00038357	MergePeak_7498	quadrant5	no	419	316	428	468	424	401	535	498	509	608	521	668	612	579	622	856	900	921	696	759	751	722	1018	668	301	664	580	740	700	681	703	768	841	640	685	893	867	721	1144	728	2.98	2.52	3.58	3.79	3.3	3.14
SK1G00038357	MergePeak_7499	quadrant5	no	419	316	428	468	424	401	535	498	509	608	521	668	612	579	622	856	900	921	696	759	751	722	1018	668	301	664	580	740	700	681	703	768	841	640	685	893	867	721	1144	728	2.98	2.52	3.58	3.79	3.3	3.14
SK1G00038357	MergePeak_7500	quadrant5	no	419	316	428	468	424	401	535	498	509	608	521	668	612	579	622	856	900	921	696	759	751	722	1018	668	301	664	580	740	700	681	703	768	841	640	685	893	867	721	1144	728	2.98	2.52	3.58	3.79	3.3	3.14
SK1G00038357	MergePeak_7501	quadrant5	no	419	316	428	468	424	401	535	498	509	608	521	668	612	579	622	856	900	921	696	759	751	722	1018	668	301	664	580	740	700	681	703	768	841	640	685	893	867	721	1144	728	2.98	2.52	3.58	3.79	3.3	3.14
SK1G00039297	MergePeak_1	quadrant5	no	620	478	572	540	602	518	587	499	607	530	520	681	656	546	589	745	636	703	543	669	582	642	758	621	677	762	687	752	889	910	693	719	730	705	811	906	848	976	1046	936	21.98	19.03	23.88	21.79	23.33	20.19
SK1G00039297	MergePeak_2	quadrant5	no	620	478	572	540	602	518	587	499	607	530	520	681	656	546	589	745	636	703	543	669	582	642	758	621	677	762	687	752	889	910	693	719	730	705	811	906	848	976	1046	936	21.98	19.03	23.88	21.79	23.33	20.19
SK1G00039298	MergePeak_3	quadrant5	no	333	233	346	227	289	247	250	242	297	306	296	341	384	272	254	436	419	472	273	444	309	337	378	374	360	383	325	396	413	395	467	403	422	375	436	459	477	498	499	479	10.51	8.26	12.86	8.15	9.97	8.57
SK1G00039299	MergePeak_4	quadrant5	no	23	12	15	21	18	20	14	21	7	10	14	8	16	14	35	23	25	24	10	18	16	19	26	28	23	10	3	12	27	21	16	24	17	13	21	19	15	14	20	35	2.41	1.41	1.85	2.5	2.06	2.3
SK1G00039299	MergePeak_5	quadrant5	no	23	12	15	21	18	20	14	21	7	10	14	8	16	14	35	23	25	24	10	18	16	19	26	28	23	10	3	12	27	21	16	24	17	13	21	19	15	14	20	35	2.41	1.41	1.85	2.5	2.06	2.3
SK1G00039300	MergePeak_6	quadrant5	no	2090	1699	2025	2054	2100	1902	2354	2110	2165	2163	2193	2668	2788	2358	2510	3249	2984	3376	3092	3178	3184	2907	3759	3243	3020	3587	3400	3351	3541	3679	3201	2912	3739	3127	3305	4234	3770	3847	3972	3783	28.51	26.02	32.53	31.89	31.31	28.54
SK1G00039300	MergePeak_7	quadrant5	no	2090	1699	2025	2054	2100	1902	2354	2110	2165	2163	2193	2668	2788	2358	2510	3249	2984	3376	3092	3178	3184	2907	3759	3243	3020	3587	3400	3351	3541	3679	3201	2912	3739	3127	3305	4234	3770	3847	3972	3783	28.51	26.02	32.53	31.89	31.31	28.54
SK1G00039301	MergePeak_10	quadrant5	no	3147	3096	3317	3569	3713	3644	3874	3272	4048	4258	3525	4432	4314	3833	4010	5559	5190	5316	4594	5299	4641	4511	5158	3712	3712	3826	3517	4373	5230	4937	4225	4165	5034	4489	4324	5390	4988	4215	4789	5187	28.74	31.75	35.68	37.1	37.07	36.6
SK1G00039301	MergePeak_8	quadrant5	no	3147	3096	3317	3569	3713	3644	3874	3272	4048	4258	3525	4432	4314	3833	4010	5559	5190	5316	4594	5299	4641	4511	5158	3712	3712	3826	3517	4373	5230	4937	4225	4165	5034	4489	4324	5390	4988	4215	4789	5187	28.74	31.75	35.68	37.1	37.07	36.6
SK1G00039301	MergePeak_9	quadrant5	no	3147	3096	3317	3569	3713	3644	3874	3272	4048	4258	3525	4432	4314	3833	4010	5559	5190	5316	4594	5299	4641	4511	5158	3712	3712	3826	3517	4373	5230	4937	4225	4165	5034	4489	4324	5390	4988	4215	4789	5187	28.74	31.75	35.68	37.1	37.07	36.6
SK1G00039302	MergePeak_11	quadrant5	no	235	150	201	193	208	158	163	187	184	201	158	189	236	260	171	272	209	251	203	229	177	234	232	190	110	198	158	169	184	179	184	214	241	201	179	183	172	185	237	234	23.63	16.93	23.8	22.09	22.86	17.47
SK1G00039305	MergePeak_12	quadrant5	no	154	137	139	127	130	149	135	107	128	116	124	131	151	136	124	152	109	159	124	139	108	121	176	140	132	126	108	124	153	179	106	116	169	161	158	164	146	216	152	200	7.06	7.05	7.5	6.62	6.51	7.51
SK1G00039306	MergePeak_13	quadrant5	no	960	748	855	707	834	646	822	763	892	846	812	1168	1019	915	918	1206	1206	1350	938	1190	1036	1113	1430	1257	1183	1148	985	1050	1287	1402	1254	1132	1389	1254	1331	1635	1464	1520	1659	1375	25.16	22.01	26.39	21.09	23.89	18.62
SK1G00039308	MergePeak_14	quadrant6	no	74	82	49	77	66	62	73	44	58	77	80	50	56	31	56	108	67	72	51	68	57	63	72	54	35	40	54	53	76	71	37	47	28	51	35	69	52	64	38	54	1.06	1.31	0.82	1.25	1.03	0.97
SK1G00039309	MergePeak_15	quadrant5	no	89	105	76	106	105	125	102	68	94	89	75	69	125	123	105	139	130	118	109	114	127	103	123	112	102	109	84	107	171	111	100	89	100	82	91	106	90	144	139	154	4.93	6.53	4.96	6.68	6.36	7.61
SK1G00039309	MergePeak_16	quadrant5	no	89	105	76	106	105	125	102	68	94	89	75	69	125	123	105	139	130	118	109	114	127	103	123	112	102	109	84	107	171	111	100	89	100	82	91	106	90	144	139	154	4.93	6.53	4.96	6.68	6.36	7.61
SK1G00039310	MergePeak_17	quadrant5	no	467	462	396	397	393	325	348	325	398	466	434	507	652	557	476	617	598	763	644	652	684	659	1062	980	902	956	876	942	1072	1064	1028	914	1090	835	1117	1152	1098	1339	1233	1146	7.85	8.72	7.84	7.6	7.22	6.01
SK1G00039314	MergePeak_18	quadrant5	no	451	380	345	282	329	231	220	191	243	235	183	206	209	229	169	268	267	282	173	204	185	176	210	186	148	136	142	147	243	208	165	160	153	166	163	189	178	203	206	187	17.25	16.32	15.54	12.27	13.75	9.71
SK1G00039315	MergePeak_19	quadrant5	no	21	22	16	15	21	9	9	14	14	10	9	11	25	17	22	22	12	19	19	23	16	25	16	25	16	39	21	8	26	19	29	14	25	17	24	30	22	18	22	15	2.07	2.44	1.86	1.68	2.26	0.98
SK1G00039317	MergePeak_20	quadrant5	no	9316	5974	8605	5698	9706	5212	6010	8131	8946	7690	4032	9540	8996	8094	7138	13514	9939	12093	8988	8891	7564	9726	11703	11216	9823	8475	7316	9029	11134	11773	10995	10449	9092	11013	10391	14233	10393	9264	12204	9372	425.64	306.48	463.04	296.32	484.75	261.89
SK1G00039317	MergePeak_21	quadrant5	no	9316	5974	8605	5698	9706	5212	6010	8131	8946	7690	4032	9540	8996	8094	7138	13514	9939	12093	8988	8891	7564	9726	11703	11216	9823	8475	7316	9029	11134	11773	10995	10449	9092	11013	10391	14233	10393	9264	12204	9372	425.64	306.48	463.04	296.32	484.75	261.89
SK1G00039320	MergePeak_22	quadrant5	no	99	76	73	79	72	81	84	71	94	84	104	104	118	76	94	89	84	111	122	109	122	116	120	148	167	146	120	125	132	135	131	132	120	157	148	182	156	161	139	132	8.73	7.52	7.58	7.93	6.94	7.85
SK1G00039321	MergePeak_23	quadrant3	yes	87	26	35	78	102	104	144	232	197	241	519	397	840	749	424	486	642	1365	1922	959	2050	1101	2926	6417	6015	6425	4633	3447	4244	4446	5273	3283	4637	2783	5150	5457	4671	8946	4888	5078	2.67	0.9	1.26	2.72	3.42	3.5
SK1G00039322	MergePeak_23	quadrant6	no	1430	1427	894	1409	1354	1738	2191	1491	1236	1054	1724	1485	2134	1928	1527	2051	1991	2211	2714	2494	2214	2378	3824	4588	4617	4370	4064	3245	4898	3652	3418	3307	4205	3495	4454	4791	4331	6157	5468	5388	51.48	57.68	37.91	57.74	53.28	68.81
SK1G00039322	MergePeak_24	quadrant5	no	1430	1427	894	1409	1354	1738	2191	1491	1236	1054	1724	1485	2134	1928	1527	2051	1991	2211	2714	2494	2214	2378	3824	4588	4617	4370	4064	3245	4898	3652	3418	3307	4205	3495	4454	4791	4331	6157	5468	5388	51.48	57.68	37.91	57.74	53.28	68.81
SK1G00039323	MergePeak_25	quadrant6	no	107	157	103	68	108	81	73	90	113	90	108	124	133	136	99	169	170	185	134	182	136	138	262	243	234	273	224	181	226	256	273	194	288	179	292	287	275	285	321	275	7.4	12.18	8.38	5.35	8.16	6.16
SK1G00039323	MergePeak_26	quadrant5	no	107	157	103	68	108	81	73	90	113	90	108	124	133	136	99	169	170	185	134	182	136	138	262	243	234	273	224	181	226	256	273	194	288	179	292	287	275	285	321	275	7.4	12.18	8.38	5.35	8.16	6.16
SK1G00039325	MergePeak_27	quadrant5	no	43	37	48	27	31	43	44	40	37	31	21	36	52	24	36	50	42	44	46	47	37	49	56	43	42	55	35	56	43	50	45	40	50	39	46	41	55	65	52	38	8.65	8.35	11.37	6.18	6.81	9.51
SK1G00039327	MergePeak_28	quadrant5	no	278	237	244	219	263	215	272	222	299	230	266	332	370	351	256	356	312	380	300	318	311	404	409	412	354	297	287	357	442	376	342	306	371	345	436	476	368	449	433	379	14.65	14.03	15.15	13.14	15.15	12.46
SK1G00039327	MergePeak_29	quadrant5	no	278	237	244	219	263	215	272	222	299	230	266	332	370	351	256	356	312	380	300	318	311	404	409	412	354	297	287	357	442	376	342	306	371	345	436	476	368	449	433	379	14.65	14.03	15.15	13.14	15.15	12.46
SK1G00039329	MergePeak_30	quadrant5	no	421	406	449	415	377	414	425	358	448	498	433	470	547	411	505	669	579	645	562	625	658	558	801	719	623	740	671	731	863	883	635	620	797	671	731	829	768	786	927	914	5.32	5.76	6.69	5.97	5.21	5.76
SK1G00039329	MergePeak_31	quadrant5	no	421	406	449	415	377	414	425	358	448	498	433	470	547	411	505	669	579	645	562	625	658	558	801	719	623	740	671	731	863	883	635	620	797	671	731	829	768	786	927	914	5.32	5.76	6.69	5.97	5.21	5.76
SK1G00039329	MergePeak_32	quadrant5	no	421	406	449	415	377	414	425	358	448	498	433	470	547	411	505	669	579	645	562	625	658	558	801	719	623	740	671	731	863	883	635	620	797	671	731	829	768	786	927	914	5.32	5.76	6.69	5.97	5.21	5.76
SK1G00039329	MergePeak_33	quadrant5	no	421	406	449	415	377	414	425	358	448	498	433	470	547	411	505	669	579	645	562	625	658	558	801	719	623	740	671	731	863	883	635	620	797	671	731	829	768	786	927	914	5.32	5.76	6.69	5.97	5.21	5.76
SK1G00039329	MergePeak_34	quadrant5	no	421	406	449	415	377	414	425	358	448	498	433	470	547	411	505	669	579	645	562	625	658	558	801	719	623	740	671	731	863	883	635	620	797	671	731	829	768	786	927	914	5.32	5.76	6.69	5.97	5.21	5.76
SK1G00039329	MergePeak_35	quadrant4	no	421	406	449	415	377	414	425	358	448	498	433	470	547	411	505	669	579	645	562	625	658	558	801	719	623	740	671	731	863	883	635	620	797	671	731	829	768	786	927	914	5.32	5.76	6.69	5.97	5.21	5.76
SK1G00039330	MergePeak_36	quadrant5	no	315	251	297	323	260	275	259	239	322	278	321	366	330	348	324	443	362	452	376	410	439	347	568	415	495	427	408	533	554	562	509	488	601	493	505	558	491	453	584	522	8.5	7.6	9.43	9.92	7.66	8.16
SK1G00039330	MergePeak_37	quadrant5	no	315	251	297	323	260	275	259	239	322	278	321	366	330	348	324	443	362	452	376	410	439	347	568	415	495	427	408	533	554	562	509	488	601	493	505	558	491	453	584	522	8.5	7.6	9.43	9.92	7.66	8.16
SK1G00039331	MergePeak_37	quadrant2	no	0	0	0	0	1	0	0	0	0	0	2	1	0	1	0	0	0	1	0	0	0	0	3	0	3	0	0	0	0	0	1	0	0	0	0	0	0	0	0	0	0	0	0	0	0.14	0
SK1G00039332	MergePeak_38	quadrant5	no	546	464	590	586	536	512	642	536	674	641	474	817	609	462	588	817	644	684	516	594	557	480	521	393	417	415	377	433	510	514	482	486	559	419	541	562	575	400	571	515	7.36	7.03	9.37	8.99	7.9	7.59
SK1G00039332	MergePeak_39	quadrant5	no	546	464	590	586	536	512	642	536	674	641	474	817	609	462	588	817	644	684	516	594	557	480	521	393	417	415	377	433	510	514	482	486	559	419	541	562	575	400	571	515	7.36	7.03	9.37	8.99	7.9	7.59
SK1G00039332	MergePeak_40	quadrant5	no	546	464	590	586	536	512	642	536	674	641	474	817	609	462	588	817	644	684	516	594	557	480	521	393	417	415	377	433	510	514	482	486	559	419	541	562	575	400	571	515	7.36	7.03	9.37	8.99	7.9	7.59
SK1G00039333	MergePeak_41	quadrant5	no	151	108	153	127	162	120	137	138	147	128	121	178	141	124	128	197	167	136	138	140	168	143	165	160	103	92	96	96	135	127	126	121	151	133	113	168	168	112	154	131	4.03	3.23	4.81	3.86	4.72	3.52
SK1G00039333	MergePeak_42	quadrant5	no	151	108	153	127	162	120	137	138	147	128	121	178	141	124	128	197	167	136	138	140	168	143	165	160	103	92	96	96	135	127	126	121	151	133	113	168	168	112	154	131	4.03	3.23	4.81	3.86	4.72	3.52
SK1G00039334	MergePeak_43	quadrant5	no	6	2	6	1	1	6	1	0	2	0	2	1	1	2	3	2	1	3	2	0	1	3	4	2	3	2	2	3	1	4	2	5	3	2	2	6	5	2	4	2	1.45	0.54	1.7	0.27	0.26	1.59
SK1G00039337	MergePeak_44	quadrant5	no	1434	1054	1327	1242	1408	1189	1523	1287	1226	1163	1057	1302	1356	1124	1045	1373	1326	1262	1143	1343	1071	1135	1176	1069	739	796	876	999	1328	1277	1031	962	1118	1046	1035	1251	950	1189	1191	1162	42.78	35.3	46.62	42.17	45.91	39.01
SK1G00039337	MergePeak_45	quadrant5	no	1434	1054	1327	1242	1408	1189	1523	1287	1226	1163	1057	1302	1356	1124	1045	1373	1326	1262	1143	1343	1071	1135	1176	1069	739	796	876	999	1328	1277	1031	962	1118	1046	1035	1251	950	1189	1191	1162	42.78	35.3	46.62	42.17	45.91	39.01
SK1G00039338	MergePeak_46	quadrant5	no	972	898	912	887	926	904	829	804	844	886	845	1083	1040	1119	987	1348	1270	1408	936	1288	992	1066	1332	1106	1031	930	885	1019	1218	1229	1255	1226	1354	1085	1237	1375	1330	1363	1527	1275	22.72	23.57	25.11	23.6	23.66	23.24
SK1G00039338	MergePeak_47	quadrant5	no	972	898	912	887	926	904	829	804	844	886	845	1083	1040	1119	987	1348	1270	1408	936	1288	992	1066	1332	1106	1031	930	885	1019	1218	1229	1255	1226	1354	1085	1237	1375	1330	1363	1527	1275	22.72	23.57	25.11	23.6	23.66	23.24
SK1G00039341	MergePeak_48	quadrant4	no	80	45	53	54	74	64	77	73	58	51	81	69	63	48	63	95	102	107	86	105	74	81	115	82	133	64	70	72	99	92	79	103	111	100	70	108	100	81	114	77	9.75	6.16	7.61	7.49	9.86	8.58
SK1G00039342	MergePeak_49	quadrant4	no	164	194	148	152	188	219	169	146	149	131	152	201	201	202	194	234	255	271	204	199	196	183	281	225	163	134	148	182	210	232	196	183	216	188	190	227	215	244	278	337	20.59	27.34	21.88	21.72	25.8	30.23
SK1G00039343	MergePeak_50	quadrant5	no	789	726	1020	1156	1163	1308	1624	1356	1853	1729	1606	1916	2003	1956	1665	2362	1962	2198	2097	2239	2016	1851	1979	1765	1708	1785	1814	1699	1911	1994	2130	1785	2101	1907	1752	2609	2408	1908	2120	1831	21.18	21.88	32.24	35.32	34.12	38.61
SK1G00039344	MergePeak_51	quadrant8	no	0	1	4	0	3	3	1	0	7	1	1	2	1	0	2	1	0	1	0	1	0	2	0	0	0	2	1	0	1	2	2	2	1	0	2	0	2	0	1	0	0	0.34	1.41	0	0.98	0.99
SK1G00039346	MergePeak_52	quadrant5	no	57	69	59	77	70	70	93	75	73	99	90	92	77	96	84	115	119	120	102	96	95	115	114	107	70	83	89	134	91	97	109	113	133	119	127	96	91	104	91	117	4.01	5.45	4.88	6.16	5.38	5.41
SK1G00039347	MergePeak_53	quadrant5	no	4	0	1	10	2	7	2	1	1	3	1	2	7	4	1	13	10	7	8	4	3	7	3	7	0	11	6	7	8	7	6	3	7	8	8	8	5	13	6	4	0.78	0	0.23	2.22	0.43	1.5
SK1G00039348	MergePeak_54	quadrant2	no	2	1	0	0	1	1	5	1	1	4	3	2	0	8	1	4	6	9	4	1	0	6	0	6	2	9	5	6	7	6	4	4	6	3	4	5	5	4	1	5	0.43	0.24	0	0	0.23	0.23
SK1G00039349	MergePeak_55	quadrant5	no	461	332	363	368	432	355	453	380	422	385	365	414	528	412	404	626	551	569	416	596	512	531	610	588	522	602	582	549	666	618	609	552	712	581	560	769	663	695	742	725	20.83	16.85	19.32	18.93	21.34	17.64
SK1G00039349	MergePeak_56	quadrant5	no	461	332	363	368	432	355	453	380	422	385	365	414	528	412	404	626	551	569	416	596	512	531	610	588	522	602	582	549	666	618	609	552	712	581	560	769	663	695	742	725	20.83	16.85	19.32	18.93	21.34	17.64
SK1G00039350	MergePeak_57	quadrant5	no	211	113	213	172	188	160	179	206	177	142	141	175	197	154	142	226	159	175	189	215	130	166	214	121	120	123	133	160	224	186	206	171	127	160	138	185	170	181	196	157	5.35	3.22	6.36	4.96	5.21	4.46
SK1G00039351	MergePeak_58	quadrant5	no	246	201	228	219	268	205	261	232	216	212	220	309	278	210	253	304	288	294	216	287	243	245	252	251	251	232	198	228	233	237	252	233	251	222	238	271	257	275	315	277	11.28	10.35	12.31	11.43	13.43	10.34
SK1G00039351	MergePeak_59	quadrant5	no	246	201	228	219	268	205	261	232	216	212	220	309	278	210	253	304	288	294	216	287	243	245	252	251	251	232	198	228	233	237	252	233	251	222	238	271	257	275	315	277	11.28	10.35	12.31	11.43	13.43	10.34
SK1G00039352	MergePeak_60	quadrant5	no	749	646	716	670	645	667	767	619	701	789	716	904	975	1024	759	1227	912	1143	1174	1076	1179	988	1464	1876	1702	1941	1762	1380	1710	1818	1731	1373	1891	1212	1563	1963	2000	2488	1973	1954	16.66	16.13	18.75	16.96	15.68	16.31
SK1G00039352	MergePeak_61	quadrant5	no	749	646	716	670	645	667	767	619	701	789	716	904	975	1024	759	1227	912	1143	1174	1076	1179	988	1464	1876	1702	1941	1762	1380	1710	1818	1731	1373	1891	1212	1563	1963	2000	2488	1973	1954	16.66	16.13	18.75	16.96	15.68	16.31
SK1G00039353	MergePeak_62	quadrant5	no	123	99	84	97	94	99	129	109	93	90	120	112	145	118	121	150	125	147	168	120	148	138	204	213	153	216	203	149	197	145	171	157	216	153	249	208	208	265	222	212	3.27	2.95	2.63	2.93	2.73	2.89
SK1G00039353	MergePeak_63	quadrant5	no	123	99	84	97	94	99	129	109	93	90	120	112	145	118	121	150	125	147	168	120	148	138	204	213	153	216	203	149	197	145	171	157	216	153	249	208	208	265	222	212	3.27	2.95	2.63	2.93	2.73	2.89
SK1G00039353	MergePeak_64	quadrant5	no	123	99	84	97	94	99	129	109	93	90	120	112	145	118	121	150	125	147	168	120	148	138	204	213	153	216	203	149	197	145	171	157	216	153	249	208	208	265	222	212	3.27	2.95	2.63	2.93	2.73	2.89
SK1G00039354	MergePeak_65	quadrant5	no	121	105	105	112	122	136	122	102	137	125	131	144	162	118	104	160	136	166	182	171	172	155	189	180	195	187	182	153	186	186	160	154	186	145	198	289	226	197	220	218	2.98	2.9	3.05	3.14	3.28	3.68
SK1G00039355	MergePeak_66	quadrant5	no	418	374	333	410	441	455	318	356	413	330	359	410	435	469	466	489	584	578	388	444	452	346	589	517	383	287	214	353	396	539	375	426	400	422	388	460	449	485	549	618	21.59	21.69	20.26	24.1	24.9	25.85
SK1G00039355	MergePeak_67	quadrant5	no	418	374	333	410	441	455	318	356	413	330	359	410	435	469	466	489	584	578	388	444	452	346	589	517	383	287	214	353	396	539	375	426	400	422	388	460	449	485	549	618	21.59	21.69	20.26	24.1	24.9	25.85
SK1G00039356	MergePeak_68	quadrant5	no	1408	1250	1385	1236	1342	1310	1615	1395	1578	1519	1442	1850	1823	1614	1464	2039	1772	2127	1764	1889	1845	1867	2220	2250	2209	2283	2137	2047	2210	2205	2348	2026	2479	2044	2381	2730	2430	2590	2696	2533	44.93	44.77	52.02	44.87	46.79	45.95
SK1G00039356	MergePeak_69	quadrant5	no	1408	1250	1385	1236	1342	1310	1615	1395	1578	1519	1442	1850	1823	1614	1464	2039	1772	2127	1764	1889	1845	1867	2220	2250	2209	2283	2137	2047	2210	2205	2348	2026	2479	2044	2381	2730	2430	2590	2696	2533	44.93	44.77	52.02	44.87	46.79	45.95
SK1G00039357	MergePeak_70	quadrant5	no	288	237	304	236	247	255	280	239	251	227	192	270	298	205	236	332	328	322	237	327	258	306	385	334	301	307	322	307	335	359	384	366	379	321	357	446	398	397	449	376	4.35	4.03	5.42	4.05	4.12	4.23
SK1G00039362	MergePeak_71	quadrant5	no	476	607	497	677	584	614	631	525	651	529	530	564	744	663	696	731	717	755	589	723	699	613	895	803	518	794	671	658	789	792	715	627	707	617	646	826	751	848	768	839	12.61	18.05	15.5	20.41	16.91	17.89
SK1G00039362	MergePeak_72	quadrant5	no	476	607	497	677	584	614	631	525	651	529	530	564	744	663	696	731	717	755	589	723	699	613	895	803	518	794	671	658	789	792	715	627	707	617	646	826	751	848	768	839	12.61	18.05	15.5	20.41	16.91	17.89
SK1G00039367	MergePeak_73	quadrant5	no	480	415	393	412	426	420	419	381	406	417	420	456	567	425	427	540	591	645	570	571	543	573	691	889	721	877	778	705	773	857	790	748	963	646	920	882	846	962	875	907	12.6	12.45	12.15	12.93	12.68	12.35
SK1G00039367	MergePeak_74	quadrant5	no	480	415	393	412	426	420	419	381	406	417	420	456	567	425	427	540	591	645	570	571	543	573	691	889	721	877	778	705	773	857	790	748	963	646	920	882	846	962	875	907	12.6	12.45	12.15	12.93	12.68	12.35
SK1G00039369	MergePeak_75	quadrant5	no	617	452	556	538	477	450	630	396	420	328	350	567	370	277	295	544	365	414	482	350	497	406	573	506	627	679	915	451	499	539	558	574	788	362	820	462	1038	657	991	909	25.97	21.38	27.57	25.78	21.95	20.83
SK1G00039369	MergePeak_76	quadrant5	no	617	452	556	538	477	450	630	396	420	328	350	567	370	277	295	544	365	414	482	350	497	406	573	506	627	679	915	451	499	539	558	574	788	362	820	462	1038	657	991	909	25.97	21.38	27.57	25.78	21.95	20.83
SK1G00039370	MergePeak_77	quadrant5	no	30	47	27	44	33	48	36	38	34	21	40	35	69	62	60	86	48	69	124	48	86	67	83	73	69	87	87	96	92	86	96	91	124	42	99	93	74	100	81	85	1.88	3.31	2	3.14	2.26	3.31
SK1G00039372	MergePeak_78	quadrant5	no	117	69	98	104	138	140	227	199	125	144	131	160	218	107	142	231	195	224	198	220	165	154	292	318	244	313	233	165	223	194	186	189	283	144	200	283	325	309	339	295	5.51	3.65	5.43	5.57	7.1	7.25
SK1G00039372	MergePeak_79	quadrant5	no	117	69	98	104	138	140	227	199	125	144	131	160	218	107	142	231	195	224	198	220	165	154	292	318	244	313	233	165	223	194	186	189	283	144	200	283	325	309	339	295	5.51	3.65	5.43	5.57	7.1	7.25
SK1G00039375	MergePeak_80	quadrant8	no	343	188	131	95	116	57	81	25	36	40	110	75	98	42	60	122	37	53	16	75	29	14	77	17	14	24	23	60	44	55	58	40	90	22	30	43	34	60	178	28	22.41	13.79	10.08	7.07	8.29	4.1
SK1G00039377	MergePeak_81	quadrant5	no	361	443	248	456	399	632	384	305	373	257	258	358	410	369	405	496	362	430	378	248	433	272	392	398	287	418	317	246	370	420	280	248	308	221	302	304	422	316	431	526	11.94	16.46	9.66	17.17	14.43	23
SK1G00039377	MergePeak_82	quadrant5	no	361	443	248	456	399	632	384	305	373	257	258	358	410	369	405	496	362	430	378	248	433	272	392	398	287	418	317	246	370	420	280	248	308	221	302	304	422	316	431	526	11.94	16.46	9.66	17.17	14.43	23
SK1G00039379	MergePeak_83	quadrant5	no	59	46	57	52	62	73	86	86	59	59	93	80	116	95	127	122	152	108	153	118	161	163	166	185	124	191	202	130	160	141	156	125	179	82	122	165	189	169	163	169	2.11	1.85	2.4	2.12	2.42	2.87
SK1G00039379	MergePeak_84	quadrant5	no	59	46	57	52	62	73	86	86	59	59	93	80	116	95	127	122	152	108	153	118	161	163	166	185	124	191	202	130	160	141	156	125	179	82	122	165	189	169	163	169	2.11	1.85	2.4	2.12	2.42	2.87
SK1G00039379	MergePeak_85	quadrant5	no	59	46	57	52	62	73	86	86	59	59	93	80	116	95	127	122	152	108	153	118	161	163	166	185	124	191	202	130	160	141	156	125	179	82	122	165	189	169	163	169	2.11	1.85	2.4	2.12	2.42	2.87
SK1G00039380	MergePeak_86	quadrant5	no	487	483	463	521	467	448	481	434	515	554	445	481	541	464	443	657	592	592	464	522	565	539	597	505	502	518	471	510	586	563	656	472	592	514	548	607	617	571	574	571	23.03	25.65	25.79	28.04	24.14	23.3
SK1G00039380	MergePeak_87	quadrant5	no	487	483	463	521	467	448	481	434	515	554	445	481	541	464	443	657	592	592	464	522	565	539	597	505	502	518	471	510	586	563	656	472	592	514	548	607	617	571	574	571	23.03	25.65	25.79	28.04	24.14	23.3
SK1G00039384	MergePeak_88	quadrant4	no	726	801	573	826	785	1000	845	716	623	589	699	719	932	861	864	986	985	966	928	895	1015	821	1209	1129	907	1076	1100	958	1114	1026	930	835	1154	841	934	1095	1122	1360	1195	1347	49.36	61.15	45.88	63.92	58.34	74.77
SK1G00039384	MergePeak_89	quadrant5	no	726	801	573	826	785	1000	845	716	623	589	699	719	932	861	864	986	985	966	928	895	1015	821	1209	1129	907	1076	1100	958	1114	1026	930	835	1154	841	934	1095	1122	1360	1195	1347	49.36	61.15	45.88	63.92	58.34	74.77
SK1G00039384	MergePeak_90	quadrant5	no	726	801	573	826	785	1000	845	716	623	589	699	719	932	861	864	986	985	966	928	895	1015	821	1209	1129	907	1076	1100	958	1114	1026	930	835	1154	841	934	1095	1122	1360	1195	1347	49.36	61.15	45.88	63.92	58.34	74.77
SK1G00039385	MergePeak_91	quadrant5	no	263	202	234	196	235	244	213	149	178	186	143	180	224	178	201	292	194	262	188	209	239	196	279	281	211	270	252	247	294	200	259	276	319	157	348	298	295	253	281	301	13.65	11.77	14.31	11.58	13.34	13.93
SK1G00039385	MergePeak_92	quadrant5	no	263	202	234	196	235	244	213	149	178	186	143	180	224	178	201	292	194	262	188	209	239	196	279	281	211	270	252	247	294	200	259	276	319	157	348	298	295	253	281	301	13.65	11.77	14.31	11.58	13.34	13.93
SK1G00039386	MergePeak_93	quadrant5	no	588	354	529	589	500	614	732	634	936	824	852	1032	992	801	928	1189	823	1364	957	991	1073	912	1145	1013	1089	1095	1266	1140	1222	1182	1231	1175	1296	1044	1260	1325	1234	1246	1334	1374	17.06	11.53	18.07	19.45	15.86	19.59
SK1G00039386	MergePeak_94	quadrant5	no	588	354	529	589	500	614	732	634	936	824	852	1032	992	801	928	1189	823	1364	957	991	1073	912	1145	1013	1089	1095	1266	1140	1222	1182	1231	1175	1296	1044	1260	1325	1234	1246	1334	1374	17.06	11.53	18.07	19.45	15.86	19.59
SK1G00039386	MergePeak_95	quadrant5	no	588	354	529	589	500	614	732	634	936	824	852	1032	992	801	928	1189	823	1364	957	991	1073	912	1145	1013	1089	1095	1266	1140	1222	1182	1231	1175	1296	1044	1260	1325	1234	1246	1334	1374	17.06	11.53	18.07	19.45	15.86	19.59
SK1G00039388	MergePeak_96	quadrant5	no	84	60	59	52	58	66	83	97	86	78	69	104	71	64	80	108	96	109	104	75	94	120	117	85	227	100	105	120	76	132	99	119	99	58	108	89	108	102	128	103	3.96	3.18	3.28	2.79	2.99	3.42
SK1G00039388	MergePeak_97	quadrant5	no	84	60	59	52	58	66	83	97	86	78	69	104	71	64	80	108	96	109	104	75	94	120	117	85	227	100	105	120	76	132	99	119	99	58	108	89	108	102	128	103	3.96	3.18	3.28	2.79	2.99	3.42
SK1G00039389	MergePeak_98	quadrant5	no	43	35	42	35	45	44	53	37	38	30	49	44	40	47	38	47	60	52	29	40	31	44	29	21	44	27	36	34	23	33	28	37	24	31	39	36	43	44	47	35	2.56	2.34	2.94	2.37	2.93	2.88
SK1G00039389	MergePeak_99	quadrant5	no	43	35	42	35	45	44	53	37	38	30	49	44	40	47	38	47	60	52	29	40	31	44	29	21	44	27	36	34	23	33	28	37	24	31	39	36	43	44	47	35	2.56	2.34	2.94	2.37	2.93	2.88
SK1G00039391	MergePeak_100	quadrant8	no	830	518	612	692	703	665	1011	685	242	215	447	442	343	127	338	502	315	295	243	166	197	106	432	148	202	369	437	160	113	172	207	272	249	86	148	97	185	136	327	241	77.79	54.51	67.55	73.82	72.02	68.54
SK1G00039391	MergePeak_101	quadrant8	no	830	518	612	692	703	665	1011	685	242	215	447	442	343	127	338	502	315	295	243	166	197	106	432	148	202	369	437	160	113	172	207	272	249	86	148	97	185	136	327	241	77.79	54.51	67.55	73.82	72.02	68.54
SK1G00039392	MergePeak_102	quadrant5	no	143	191	103	183	187	227	164	167	205	162	207	190	278	252	218	240	256	350	254	269	300	233	374	332	276	361	293	322	304	244	313	296	358	251	336	310	422	345	368	436	3.83	5.75	3.25	5.59	5.48	6.7
SK1G00039392	MergePeak_103	quadrant5	no	143	191	103	183	187	227	164	167	205	162	207	190	278	252	218	240	256	350	254	269	300	233	374	332	276	361	293	322	304	244	313	296	358	251	336	310	422	345	368	436	3.83	5.75	3.25	5.59	5.48	6.7
SK1G00039393	MergePeak_104	quadrant5	no	1187	937	1252	1155	1324	1192	1495	1278	1207	1010	1075	1240	1578	1488	1247	1571	1461	1494	1228	1644	1115	1350	1638	1370	1259	1275	1234	1373	1562	1755	1389	1323	1426	1416	1364	1833	1416	1675	1588	1468	17.84	15.81	22.16	19.76	21.75	19.7
SK1G00039393	MergePeak_105	quadrant5	no	1187	937	1252	1155	1324	1192	1495	1278	1207	1010	1075	1240	1578	1488	1247	1571	1461	1494	1228	1644	1115	1350	1638	1370	1259	1275	1234	1373	1562	1755	1389	1323	1426	1416	1364	1833	1416	1675	1588	1468	17.84	15.81	22.16	19.76	21.75	19.7
SK1G00039394	MergePeak_106	quadrant5	no	325	370	239	225	190	193	118	90	244	283	146	186	260	283	168	204	175	300	95	93	118	81	172	469	237	312	183	247	215	227	283	291	155	126	416	410	164	351	133	472	13.04	16.67	11.29	10.27	8.33	8.51
SK1G00039394	MergePeak_107	quadrant5	no	325	370	239	225	190	193	118	90	244	283	146	186	260	283	168	204	175	300	95	93	118	81	172	469	237	312	183	247	215	227	283	291	155	126	416	410	164	351	133	472	13.04	16.67	11.29	10.27	8.33	8.51
SK1G00039394	MergePeak_108	quadrant5	no	325	370	239	225	190	193	118	90	244	283	146	186	260	283	168	204	175	300	95	93	118	81	172	469	237	312	183	247	215	227	283	291	155	126	416	410	164	351	133	472	13.04	16.67	11.29	10.27	8.33	8.51
SK1G00039395	MergePeak_109	quadrant5	no	750	730	693	734	767	831	927	738	780	683	637	942	913	784	749	1046	950	1088	784	830	764	803	935	764	636	783	764	723	913	1048	757	835	775	691	853	1007	919	935	1037	1137	11.91	13.02	12.96	13.27	13.32	14.52
SK1G00039395	MergePeak_110	quadrant5	no	750	730	693	734	767	831	927	738	780	683	637	942	913	784	749	1046	950	1088	784	830	764	803	935	764	636	783	764	723	913	1048	757	835	775	691	853	1007	919	935	1037	1137	11.91	13.02	12.96	13.27	13.32	14.52
SK1G00039395	MergePeak_111	quadrant5	no	750	730	693	734	767	831	927	738	780	683	637	942	913	784	749	1046	950	1088	784	830	764	803	935	764	636	783	764	723	913	1048	757	835	775	691	853	1007	919	935	1037	1137	11.91	13.02	12.96	13.27	13.32	14.52
SK1G00039396	MergePeak_112	quadrant5	no	691	690	547	608	625	684	556	525	618	627	590	656	738	730	604	769	745	931	712	723	728	673	1045	906	739	803	829	760	1036	1044	938	821	1040	789	1095	1119	950	1058	1145	1160	11.02	12.35	10.27	11.03	10.89	11.99
SK1G00039400	MergePeak_113	quadrant5	no	158	106	86	75	86	136	134	92	114	98	114	134	128	100	98	127	109	184	92	147	140	129	185	171	121	179	162	159	249	179	157	143	208	160	216	177	169	205	218	228	3.15	2.37	2.02	1.7	1.87	2.98
SK1G00039400	MergePeak_114	quadrant4	no	158	106	86	75	86	136	134	92	114	98	114	134	128	100	98	127	109	184	92	147	140	129	185	171	121	179	162	159	249	179	157	143	208	160	216	177	169	205	218	228	3.15	2.37	2.02	1.7	1.87	2.98
SK1G00039401	MergePeak_115	quadrant5	no	83	102	94	68	92	78	107	65	53	52	53	76	116	90	59	84	95	75	79	100	66	86	119	108	104	126	71	123	102	109	74	91	85	92	93	112	101	122	141	125	3.08	4.25	4.11	2.87	3.74	3.19
SK1G00039402	MergePeak_116	quadrant5	no	250	227	279	204	207	175	258	193	217	224	173	230	260	228	190	272	275	280	198	280	165	265	284	225	184	209	180	168	244	253	285	232	251	220	194	335	239	307	319	217	8.2	8.36	10.78	7.62	7.42	6.31
SK1G00039403	MergePeak_117	quadrant8	no	58	151	39	90	89	112	61	48	54	27	48	17	77	56	72	41	48	39	44	29	50	25	44	48	27	18	27	21	45	47	25	12	19	20	26	12	21	39	26	38	2.19	6.4	1.74	3.87	3.67	4.65
SK1G00039404	MergePeak_118	quadrant5	no	891	822	925	822	874	775	980	829	998	971	925	1112	1158	942	870	1309	1124	1319	941	1178	980	1142	1422	1260	1161	1383	1209	1172	1374	1494	1330	1308	1520	1310	1439	1622	1543	1596	1726	1538	19.41	20.11	23.74	20.38	20.82	18.57
SK1G00039405	MergePeak_118	quadrant5	no	85	66	78	81	95	65	68	74	66	79	43	64	77	82	63	96	100	80	55	73	51	74	72	67	34	57	49	66	77	77	61	52	85	87	39	100	70	75	81	62	2.19	1.91	2.37	2.38	2.68	1.84
SK1G00039406	MergePeak_119	quadrant5	no	369	300	326	280	319	327	350	299	332	316	356	423	362	364	383	523	420	503	387	448	387	398	498	406	353	322	310	320	443	433	375	372	417	367	374	501	427	416	504	466	12.42	11.34	12.92	10.73	11.74	12.11
SK1G00039406	MergePeak_120	quadrant5	no	369	300	326	280	319	327	350	299	332	316	356	423	362	364	383	523	420	503	387	448	387	398	498	406	353	322	310	320	443	433	375	372	417	367	374	501	427	416	504	466	12.42	11.34	12.92	10.73	11.74	12.11
SK1G00039411	MergePeak_121	quadrant5	no	24	29	40	34	30	72	65	69	47	31	29	46	113	131	88	106	65	108	75	108	67	91	57	77	28	61	42	53	79	41	84	62	72	52	64	85	41	119	97	63	0.43	0.58	0.84	0.69	0.58	1.4
SK1G00039412	MergePeak_122	quadrant8	no	1095	847	712	742	746	659	795	521	242	200	297	297	249	190	270	522	347	376	235	190	266	160	423	250	192	205	241	217	200	213	195	195	279	140	258	216	249	240	321	350	40.57	35.24	31.07	31.29	30.22	26.85
SK1G00039413	MergePeak_123	quadrant5	no	877	644	658	507	555	499	635	460	240	207	458	501	398	227	368	638	456	397	285	310	248	180	550	259	222	343	337	269	251	352	185	333	404	139	372	261	433	267	713	543	88.61	73.06	78.3	58.31	61.3	55.45
SK1G00039413	MergePeak_124	quadrant5	no	877	644	658	507	555	499	635	460	240	207	458	501	398	227	368	638	456	397	285	310	248	180	550	259	222	343	337	269	251	352	185	333	404	139	372	261	433	267	713	543	88.61	73.06	78.3	58.31	61.3	55.45
SK1G00039418	MergePeak_125	quadrant5	no	82	49	60	54	62	61	57	57	61	46	52	69	68	60	74	69	70	74	53	89	60	80	134	135	158	146	88	112	123	128	139	90	108	115	206	160	108	189	149	157	3.35	2.25	2.89	2.51	2.77	2.74
SK1G00039419	MergePeak_126	quadrant5	no	774	648	839	690	764	539	617	631	823	893	663	866	937	875	752	1191	976	999	822	828	846	986	1258	973	813	929	833	817	931	1007	907	848	1132	960	1005	1264	1266	1103	1520	1030	82.49	77.55	105.32	83.71	89.01	63.18
SK1G00039419	MergePeak_127	quadrant5	no	774	648	839	690	764	539	617	631	823	893	663	866	937	875	752	1191	976	999	822	828	846	986	1258	973	813	929	833	817	931	1007	907	848	1132	960	1005	1264	1266	1103	1520	1030	82.49	77.55	105.32	83.71	89.01	63.18
SK1G00039420	MergePeak_128	quadrant5	no	1257	1027	1302	1472	1286	1248	1486	1110	1097	1055	1037	1564	1053	871	1019	1413	1161	1051	932	871	836	681	910	634	901	736	801	475	495	639	459	662	756	498	555	631	855	631	825	809	38.69	35.49	47.19	51.56	43.26	42.24
SK1G00039421	MergePeak_129	quadrant5	no	102	64	87	99	86	82	67	61	97	101	91	101	100	104	109	115	121	175	92	135	112	103	127	121	139	103	81	77	121	136	145	109	124	100	135	145	136	113	136	175	7.41	5.22	7.45	8.19	6.83	6.55
SK1G00039422	MergePeak_130	quadrant5	no	896	750	712	746	832	755	880	724	761	728	752	892	934	817	734	1054	847	947	870	917	862	946	1185	1083	1004	1006	893	906	1152	1018	1079	951	1077	897	1185	1164	1019	1167	1232	1222	50.34	47.31	47.11	47.71	51.1	46.65
SK1G00039422	MergePeak_131	quadrant5	no	896	750	712	746	832	755	880	724	761	728	752	892	934	817	734	1054	847	947	870	917	862	946	1185	1083	1004	1006	893	906	1152	1018	1079	951	1077	897	1185	1164	1019	1167	1232	1222	50.34	47.31	47.11	47.71	51.1	46.65
SK1G00039422	MergePeak_132	quadrant5	no	896	750	712	746	832	755	880	724	761	728	752	892	934	817	734	1054	847	947	870	917	862	946	1185	1083	1004	1006	893	906	1152	1018	1079	951	1077	897	1185	1164	1019	1167	1232	1222	50.34	47.31	47.11	47.71	51.1	46.65
SK1G00039423	MergePeak_133	quadrant2	no	124	114	113	117	125	180	163	196	207	171	171	170	273	179	251	272	287	498	303	272	441	445	531	728	610	629	511	627	663	624	595	458	895	407	771	715	512	924	720	938	5.8	5.98	6.22	6.23	6.39	9.26
SK1G00039423	MergePeak_134	quadrant2	no	124	114	113	117	125	180	163	196	207	171	171	170	273	179	251	272	287	498	303	272	441	445	531	728	610	629	511	627	663	624	595	458	895	407	771	715	512	924	720	938	5.8	5.98	6.22	6.23	6.39	9.26
SK1G00039425	MergePeak_135	quadrant5	no	223	168	175	174	189	152	163	180	171	131	149	183	202	182	138	222	216	254	169	193	179	162	213	177	332	141	140	184	214	238	194	173	229	171	182	231	188	176	216	204	5.68	4.81	5.25	5.05	5.27	4.26
SK1G00039431	MergePeak_136	quadrant2	no	29	38	43	51	67	71	84	116	92	100	141	123	165	99	137	144	123	186	168	136	181	197	166	250	132	225	194	152	240	181	169	186	239	130	265	195	185	153	227	259	2.93	4.31	5.12	5.87	7.4	7.89
SK1G00039431	MergePeak_137	quadrant2	no	29	38	43	51	67	71	84	116	92	100	141	123	165	99	137	144	123	186	168	136	181	197	166	250	132	225	194	152	240	181	169	186	239	130	265	195	185	153	227	259	2.93	4.31	5.12	5.87	7.4	7.89
SK1G00039434	MergePeak_138	quadrant5	no	1076	886	816	856	850	853	947	790	910	838	934	999	1091	1017	853	1309	1178	1392	1055	1113	1143	1140	1654	1534	1539	1440	1408	1227	1532	1524	1475	1218	1640	1205	1441	1815	1592	1831	1832	1788	37.31	34.5	33.32	33.78	32.22	32.53
SK1G00039434	MergePeak_139	quadrant5	no	1076	886	816	856	850	853	947	790	910	838	934	999	1091	1017	853	1309	1178	1392	1055	1113	1143	1140	1654	1534	1539	1440	1408	1227	1532	1524	1475	1218	1640	1205	1441	1815	1592	1831	1832	1788	37.31	34.5	33.32	33.78	32.22	32.53
SK1G00039436	MergePeak_140	quadrant5	no	2445	2189	2173	1792	2017	1540	1866	1709	1786	1982	1602	2091	1933	1483	1756	2884	2322	2724	1881	2010	1774	2223	2785	2191	2935	2260	2315	2319	2799	2704	2426	2159	3447	2250	3095	3011	2311	2847	3359	2869	37.56	37.76	39.31	31.33	33.87	26.02
SK1G00039436	MergePeak_141	quadrant5	no	2445	2189	2173	1792	2017	1540	1866	1709	1786	1982	1602	2091	1933	1483	1756	2884	2322	2724	1881	2010	1774	2223	2785	2191	2935	2260	2315	2319	2799	2704	2426	2159	3447	2250	3095	3011	2311	2847	3359	2869	37.56	37.76	39.31	31.33	33.87	26.02
SK1G00039436	MergePeak_142	quadrant5	no	2445	2189	2173	1792	2017	1540	1866	1709	1786	1982	1602	2091	1933	1483	1756	2884	2322	2724	1881	2010	1774	2223	2785	2191	2935	2260	2315	2319	2799	2704	2426	2159	3447	2250	3095	3011	2311	2847	3359	2869	37.56	37.76	39.31	31.33	33.87	26.02
SK1G00039436	MergePeak_143	quadrant4	no	2445	2189	2173	1792	2017	1540	1866	1709	1786	1982	1602	2091	1933	1483	1756	2884	2322	2724	1881	2010	1774	2223	2785	2191	2935	2260	2315	2319	2799	2704	2426	2159	3447	2250	3095	3011	2311	2847	3359	2869	37.56	37.76	39.31	31.33	33.87	26.02
SK1G00039438	MergePeak_144	quadrant5	no	634	328	371	718	305	724	877	622	648	543	654	931	1027	1193	1007	1050	1178	979	789	1257	957	1318	1259	1045	244	1190	1286	1634	1754	1295	1452	1045	1122	1175	1113	1684	1154	1165	859	1304	8.56	4.98	5.9	11.04	4.5	10.75
SK1G00039438	MergePeak_145	quadrant5	no	634	328	371	718	305	724	877	622	648	543	654	931	1027	1193	1007	1050	1178	979	789	1257	957	1318	1259	1045	244	1190	1286	1634	1754	1295	1452	1045	1122	1175	1113	1684	1154	1165	859	1304	8.56	4.98	5.9	11.04	4.5	10.75
SK1G00039448	MergePeak_146	quadrant2	no	586	470	556	478	546	700	910	926	697	595	653	855	1733	1308	888	1107	949	1166	1180	1366	1049	1197	2031	2040	2361	2071	1699	1354	1869	1573	1717	1310	1281	1652	1634	2244	2102	3333	2295	2511	28.49	25.54	31.76	26.48	28.97	37.34
SK1G00039448	MergePeak_147	quadrant2	no	586	470	556	478	546	700	910	926	697	595	653	855	1733	1308	888	1107	949	1166	1180	1366	1049	1197	2031	2040	2361	2071	1699	1354	1869	1573	1717	1310	1281	1652	1634	2244	2102	3333	2295	2511	28.49	25.54	31.76	26.48	28.97	37.34
SK1G00039449	MergePeak_148	quadrant5	no	38	29	16	22	18	40	19	26	25	25	23	19	17	32	17	28	40	50	26	31	25	24	40	36	9	13	11	23	23	16	13	12	29	22	18	28	21	22	17	34	5.39	4.62	2.67	3.55	2.79	6.24
SK1G00039449	MergePeak_149	quadrant5	no	38	29	16	22	18	40	19	26	25	25	23	19	17	32	17	28	40	50	26	31	25	24	40	36	9	13	11	23	23	16	13	12	29	22	18	28	21	22	17	34	5.39	4.62	2.67	3.55	2.79	6.24
SK1G00039450	MergePeak_150	quadrant5	no	117	121	80	170	155	174	260	163	217	195	201	204	245	137	184	187	205	172	231	163	282	220	171	189	348	195	204	160	184	159	218	213	211	138	231	242	333	202	247	239	4.84	5.62	3.9	8	7	7.91
SK1G00039450	MergePeak_151	quadrant5	no	117	121	80	170	155	174	260	163	217	195	201	204	245	137	184	187	205	172	231	163	282	220	171	189	348	195	204	160	184	159	218	213	211	138	231	242	333	202	247	239	4.84	5.62	3.9	8	7	7.91
SK1G00039451	MergePeak_152	quadrant5	no	653	561	612	491	460	346	353	331	308	369	321	294	511	260	277	335	272	416	203	160	230	203	657	942	401	686	499	444	412	469	480	576	617	308	757	1110	548	760	765	835	25.52	24.62	28.17	21.84	19.65	14.87
SK1G00039452	MergePeak_153	quadrant5	no	51	47	54	52	63	50	57	45	65	71	45	44	80	53	37	70	89	78	55	68	35	62	38	55	35	42	42	56	29	39	59	46	44	53	46	54	48	53	67	51	6.4	6.62	7.98	7.43	8.64	6.9
SK1G00039454	MergePeak_154	quadrant5	no	67	63	50	61	44	46	59	60	57	57	32	77	51	57	60	75	72	58	53	68	47	52	39	42	27	52	41	55	53	56	72	56	73	55	61	79	78	69	74	53	1.52	1.6	1.33	1.57	1.09	1.15
SK1G00039455	MergePeak_155	quadrant5	no	33	246	35	44	52	54	68	54	49	15	34	29	77	44	88	72	57	36	38	43	73	34	53	46	86	26	30	33	49	34	27	29	29	37	13	36	38	22	32	45	0.9	7.29	1.09	1.33	1.43	1.5
SK1G00039455	MergePeak_156	quadrant5	no	33	246	35	44	52	54	68	54	49	15	34	29	77	44	88	72	57	36	38	43	73	34	53	46	86	26	30	33	49	34	27	29	29	37	13	36	38	22	32	45	0.9	7.29	1.09	1.33	1.43	1.5
SK1G00039456	MergePeak_157	quadrant5	no	139	104	141	99	127	96	78	63	89	98	89	127	158	237	135	220	136	190	114	164	118	198	250	290	76	225	201	210	228	264	245	204	223	220	228	266	226	311	287	247	4.51	3.79	5.39	3.66	4.51	3.43
SK1G00039457	MergePeak_158	quadrant5	no	27	28	25	40	32	34	41	24	37	39	46	31	55	41	40	74	57	69	38	75	54	63	82	65	88	45	63	74	52	79	59	36	65	77	70	73	64	93	81	73	3.39	3.95	3.7	5.72	4.39	4.69
SK1G00039462	MergePeak_159	quadrant5	no	746	499	760	623	610	542	683	613	748	622	596	730	817	729	641	1005	771	872	695	836	680	905	1093	954	798	951	970	889	954	1058	1017	841	1104	828	1141	1150	1079	1137	1205	1155	47.54	35.71	57.04	45.19	42.5	37.99
SK1G00039462	MergePeak_160	quadrant5	no	746	499	760	623	610	542	683	613	748	622	596	730	817	729	641	1005	771	872	695	836	680	905	1093	954	798	951	970	889	954	1058	1017	841	1104	828	1141	1150	1079	1137	1205	1155	47.54	35.71	57.04	45.19	42.5	37.99
SK1G00039463	MergePeak_161	quadrant5	no	78	272	69	132	135	185	90	108	108	79	115	64	152	130	135	113	103	133	71	117	157	95	210	139	128	140	144	117	181	183	114	73	96	135	159	134	135	137	157	176	2.46	9.63	2.56	4.74	4.65	6.42
SK1G00039466	MergePeak_162	quadrant5	no	1773	1870	1100	1430	1299	1661	1288	1040	1063	999	1078	1109	1087	1013	988	1347	1478	1271	1210	911	1246	997	1211	1032	868	565	570	552	1062	925	742	752	738	764	777	867	811	872	812	1251	129.15	152.96	94.37	118.57	103.44	133.07
SK1G00039466	MergePeak_163	quadrant5	no	1773	1870	1100	1430	1299	1661	1288	1040	1063	999	1078	1109	1087	1013	988	1347	1478	1271	1210	911	1246	997	1211	1032	868	565	570	552	1062	925	742	752	738	764	777	867	811	872	812	1251	129.15	152.96	94.37	118.57	103.44	133.07
SK1G00039471	MergePeak_164	quadrant5	no	707	692	620	664	759	662	711	589	613	587	523	693	751	580	581	879	706	773	634	676	601	508	805	674	700	677	568	605	755	816	735	623	748	800	788	943	765	826	948	758	4.52	4.97	4.67	4.83	5.3	4.65
SK1G00039471	MergePeak_165	quadrant4	no	707	692	620	664	759	662	711	589	613	587	523	693	751	580	581	879	706	773	634	676	601	508	805	674	700	677	568	605	755	816	735	623	748	800	788	943	765	826	948	758	4.52	4.97	4.67	4.83	5.3	4.65
SK1G00039471	MergePeak_166	quadrant5	no	707	692	620	664	759	662	711	589	613	587	523	693	751	580	581	879	706	773	634	676	601	508	805	674	700	677	568	605	755	816	735	623	748	800	788	943	765	826	948	758	4.52	4.97	4.67	4.83	5.3	4.65
SK1G00039471	MergePeak_167	quadrant5	no	707	692	620	664	759	662	711	589	613	587	523	693	751	580	581	879	706	773	634	676	601	508	805	674	700	677	568	605	755	816	735	623	748	800	788	943	765	826	948	758	4.52	4.97	4.67	4.83	5.3	4.65
SK1G00039472	MergePeak_168	quadrant5	no	12	17	17	37	49	37	49	48	30	31	38	41	40	34	51	47	46	45	46	48	50	41	54	38	48	31	65	38	54	43	28	51	42	38	62	58	44	42	68	42	0.15	0.24	0.25	0.52	0.67	0.51
SK1G00039476	MergePeak_169	quadrant5	no	1198	1100	966	1046	1119	1006	985	845	779	762	698	813	948	831	810	1026	867	851	742	746	626	705	833	824	744	667	638	610	833	882	620	630	863	650	777	927	855	949	1002	844	38.51	39.7	36.57	38.27	39.32	35.57
SK1G00039476	MergePeak_170	quadrant5	no	1198	1100	966	1046	1119	1006	985	845	779	762	698	813	948	831	810	1026	867	851	742	746	626	705	833	824	744	667	638	610	833	882	620	630	863	650	777	927	855	949	1002	844	38.51	39.7	36.57	38.27	39.32	35.57
SK1G00039478	MergePeak_171	quadrant5	no	1	0	0	0	0	0	2	1	0	1	1	1	2	3	0	0	0	1	1	0	1	1	0	1	0	0	0	2	2	0	4	0	0	0	5	2	3	1	1	0	0.27	0	0	0	0	0
SK1G00039480	MergePeak_172	quadrant5	no	625	581	548	482	595	607	630	544	493	500	475	622	704	696	600	762	738	787	638	658	720	678	857	679	690	633	663	623	793	777	588	581	878	671	685	767	769	682	836	852	25.84	26.97	26.68	22.68	26.89	27.6
SK1G00039480	MergePeak_173	quadrant5	no	625	581	548	482	595	607	630	544	493	500	475	622	704	696	600	762	738	787	638	658	720	678	857	679	690	633	663	623	793	777	588	581	878	671	685	767	769	682	836	852	25.84	26.97	26.68	22.68	26.89	27.6
SK1G00039481	MergePeak_174	quadrant5	no	448	366	376	407	375	345	332	338	473	395	451	436	687	648	415	674	595	809	548	633	600	657	1016	1058	865	1103	928	971	993	1238	1091	1015	1124	854	1164	1351	1196	1421	1205	1178	10.76	9.87	10.63	11.12	9.84	9.11
SK1G00039481	MergePeak_175	quadrant5	no	448	366	376	407	375	345	332	338	473	395	451	436	687	648	415	674	595	809	548	633	600	657	1016	1058	865	1103	928	971	993	1238	1091	1015	1124	854	1164	1351	1196	1421	1205	1178	10.76	9.87	10.63	11.12	9.84	9.11
SK1G00039484	MergePeak_176	quadrant4	no	334	246	254	280	274	260	313	249	257	254	263	310	359	319	243	395	284	373	302	338	336	350	464	449	345	431	361	358	454	450	382	326	457	424	422	516	484	517	583	438	32.63	26.99	29.23	31.14	29.26	27.94
SK1G00039486	MergePeak_177	quadrant5	no	846	569	722	637	705	495	625	514	660	644	516	781	720	750	624	886	867	849	729	801	616	763	719	713	567	566	513	559	717	800	783	645	734	599	676	885	765	842	827	727	35.28	26.64	35.46	30.24	32.14	22.7
SK1G00039486	MergePeak_178	quadrant5	no	846	569	722	637	705	495	625	514	660	644	516	781	720	750	624	886	867	849	729	801	616	763	719	713	567	566	513	559	717	800	783	645	734	599	676	885	765	842	827	727	35.28	26.64	35.46	30.24	32.14	22.7
SK1G00039487	MergePeak_179	quadrant5	no	1226	1195	1074	1050	1074	1165	1256	992	1121	1148	1060	1278	1143	1096	923	1474	1308	1436	1108	1144	1175	1066	1404	1059	1040	1089	963	1134	1403	1349	1053	1101	1272	1057	1172	1330	1261	1418	1450	1558	25.92	28.37	26.74	25.27	24.82	27.09
SK1G00039487	MergePeak_180	quadrant5	no	1226	1195	1074	1050	1074	1165	1256	992	1121	1148	1060	1278	1143	1096	923	1474	1308	1436	1108	1144	1175	1066	1404	1059	1040	1089	963	1134	1403	1349	1053	1101	1272	1057	1172	1330	1261	1418	1450	1558	25.92	28.37	26.74	25.27	24.82	27.09
SK1G00039487	MergePeak_181	quadrant5	no	1226	1195	1074	1050	1074	1165	1256	992	1121	1148	1060	1278	1143	1096	923	1474	1308	1436	1108	1144	1175	1066	1404	1059	1040	1089	963	1134	1403	1349	1053	1101	1272	1057	1172	1330	1261	1418	1450	1558	25.92	28.37	26.74	25.27	24.82	27.09
SK1G00039488	MergePeak_181	quadrant5	no	437	375	398	378	395	427	410	313	338	304	297	394	391	326	342	443	356	361	301	432	309	366	473	470	235	360	264	357	442	489	351	386	382	374	339	463	392	343	396	427	9.64	9.28	10.34	9.49	9.52	10.35
SK1G00039488	MergePeak_182	quadrant5	no	437	375	398	378	395	427	410	313	338	304	297	394	391	326	342	443	356	361	301	432	309	366	473	470	235	360	264	357	442	489	351	386	382	374	339	463	392	343	396	427	9.64	9.28	10.34	9.49	9.52	10.35
SK1G00039490	MergePeak_183	quadrant5	no	75	67	65	72	72	41	48	46	59	100	53	82	84	69	80	104	87	117	91	110	69	112	120	96	71	96	83	123	101	133	115	96	124	129	96	146	96	115	126	100	2.79	2.8	2.84	3.05	2.92	1.68
SK1G00039494	MergePeak_184	quadrant4	no	1398	1191	1267	1660	1508	1597	2087	1524	1514	1441	1586	2144	1845	1528	1739	2314	2041	2243	2225	1853	2305	1838	2019	1913	1707	2187	2018	1937	1964	2059	2228	1860	2028	1658	2117	2358	2467	2388	2260	2361	19.91	19.05	21.25	26.91	23.48	25.01
SK1G00039494	MergePeak_185	quadrant5	no	1398	1191	1267	1660	1508	1597	2087	1524	1514	1441	1586	2144	1845	1528	1739	2314	2041	2243	2225	1853	2305	1838	2019	1913	1707	2187	2018	1937	1964	2059	2228	1860	2028	1658	2117	2358	2467	2388	2260	2361	19.91	19.05	21.25	26.91	23.48	25.01
SK1G00039494	MergePeak_186	quadrant5	no	1398	1191	1267	1660	1508	1597	2087	1524	1514	1441	1586	2144	1845	1528	1739	2314	2041	2243	2225	1853	2305	1838	2019	1913	1707	2187	2018	1937	1964	2059	2228	1860	2028	1658	2117	2358	2467	2388	2260	2361	19.91	19.05	21.25	26.91	23.48	25.01
SK1G00039494	MergePeak_187	quadrant5	no	1398	1191	1267	1660	1508	1597	2087	1524	1514	1441	1586	2144	1845	1528	1739	2314	2041	2243	2225	1853	2305	1838	2019	1913	1707	2187	2018	1937	1964	2059	2228	1860	2028	1658	2117	2358	2467	2388	2260	2361	19.91	19.05	21.25	26.91	23.48	25.01
SK1G00039495	MergePeak_188	quadrant5	no	120	120	164	117	159	196	232	190	197	189	159	170	202	177	187	226	244	236	215	204	214	195	226	178	222	213	220	215	205	201	180	177	228	178	191	247	202	245	192	279	7.42	8.33	11.94	8.23	10.75	13.33
SK1G00039495	MergePeak_189	quadrant6	no	120	120	164	117	159	196	232	190	197	189	159	170	202	177	187	226	244	236	215	204	214	195	226	178	222	213	220	215	205	201	180	177	228	178	191	247	202	245	192	279	7.42	8.33	11.94	8.23	10.75	13.33
SK1G00039496	MergePeak_190	quadrant8	no	7588	5593	4300	3683	3762	2605	2976	2033	1380	1115	2360	1538	1825	1348	1383	3137	1846	1586	1260	1333	1216	888	2217	1009	975	1268	1418	1874	1639	1289	1661	1275	2140	688	1243	1126	1352	1537	2864	1225	437.78	362.33	292.18	241.86	237.26	165.29
SK1G00039497	MergePeak_191	quadrant5	no	444	414	404	426	449	416	416	356	372	335	339	420	454	419	366	519	447	493	420	424	426	471	586	594	508	561	565	490	685	596	525	535	606	472	606	682	592	715	627	686	15.05	15.76	16.13	16.44	16.64	15.51
SK1G00039497	MergePeak_192	quadrant5	no	444	414	404	426	449	416	416	356	372	335	339	420	454	419	366	519	447	493	420	424	426	471	586	594	508	561	565	490	685	596	525	535	606	472	606	682	592	715	627	686	15.05	15.76	16.13	16.44	16.64	15.51
SK1G00039498	MergePeak_193	quadrant5	no	237	248	198	229	286	265	327	347	202	208	237	190	327	271	387	319	348	331	405	343	423	284	460	591	680	839	683	451	478	539	530	377	551	258	495	469	528	1024	535	661	13.83	16.25	13.61	15.21	18.24	17
SK1G00039498	MergePeak_194	quadrant5	no	237	248	198	229	286	265	327	347	202	208	237	190	327	271	387	319	348	331	405	343	423	284	460	591	680	839	683	451	478	539	530	377	551	258	495	469	528	1024	535	661	13.83	16.25	13.61	15.21	18.24	17
SK1G00039499	MergePeak_195	quadrant5	no	178	191	150	140	228	232	202	216	223	235	262	233	367	260	246	346	391	409	297	299	361	286	448	464	369	444	392	365	398	468	429	403	443	422	585	555	513	423	569	604	7.52	9.07	7.47	6.74	10.54	10.79
SK1G00039499	MergePeak_196	quadrant5	no	178	191	150	140	228	232	202	216	223	235	262	233	367	260	246	346	391	409	297	299	361	286	448	464	369	444	392	365	398	468	429	403	443	422	585	555	513	423	569	604	7.52	9.07	7.47	6.74	10.54	10.79
SK1G00039499	MergePeak_197	quadrant5	no	178	191	150	140	228	232	202	216	223	235	262	233	367	260	246	346	391	409	297	299	361	286	448	464	369	444	392	365	398	468	429	403	443	422	585	555	513	423	569	604	7.52	9.07	7.47	6.74	10.54	10.79
SK1G00039500	MergePeak_198	quadrant5	no	3	2	2	2	8	4	8	6	4	5	4	4	5	4	8	10	5	16	9	10	4	8	8	2	5	4	10	7	18	4	4	13	10	11	7	24	10	16	17	11	0.49	0.37	0.39	0.37	1.44	0.72
SK1G00039500	MergePeak_199	quadrant5	no	3	2	2	2	8	4	8	6	4	5	4	4	5	4	8	10	5	16	9	10	4	8	8	2	5	4	10	7	18	4	4	13	10	11	7	24	10	16	17	11	0.49	0.37	0.39	0.37	1.44	0.72
SK1G00039501	MergePeak_200	quadrant5	no	254	256	211	207	234	195	207	206	233	201	188	200	249	178	144	292	228	267	219	270	203	244	344	272	217	246	230	217	322	396	200	260	222	256	305	321	334	319	406	275	15.61	17.67	15.27	14.48	15.72	13.18
SK1G00039506	MergePeak_201	quadrant5	no	706	679	591	676	660	693	744	522	659	658	591	679	735	725	644	862	770	819	648	724	785	737	864	761	697	698	718	687	908	909	705	708	780	738	819	901	795	929	886	927	18.12	19.57	17.86	19.75	18.52	19.56
SK1G00039507	MergePeak_202	quadrant5	no	29	18	12	11	15	30	19	19	23	18	10	22	20	17	17	22	22	15	30	14	21	26	44	36	21	46	37	25	57	39	22	32	48	37	24	30	28	31	27	30	2.08	1.45	1.01	0.9	1.17	2.36
SK1G00039507	MergePeak_203	quadrant5	no	29	18	12	11	15	30	19	19	23	18	10	22	20	17	17	22	22	15	30	14	21	26	44	36	21	46	37	25	57	39	22	32	48	37	24	30	28	31	27	30	2.08	1.45	1.01	0.9	1.17	2.36
SK1G00039509	MergePeak_204	quadrant5	no	586	572	577	622	637	620	551	519	668	574	543	772	682	616	605	783	754	776	637	723	645	636	770	672	614	594	575	598	726	730	703	626	691	587	642	841	731	637	814	818	18.18	19.92	21.08	21.96	21.6	21.15
SK1G00039509	MergePeak_205	quadrant5	no	586	572	577	622	637	620	551	519	668	574	543	772	682	616	605	783	754	776	637	723	645	636	770	672	614	594	575	598	726	730	703	626	691	587	642	841	731	637	814	818	18.18	19.92	21.08	21.96	21.6	21.15
SK1G00039510	MergePeak_206	quadrant5	no	2985	2633	2895	2855	2837	2693	3212	2642	3023	3039	2720	3161	2994	2422	2545	3980	3272	3606	2955	3022	3122	2876	3359	2380	2484	2587	2568	2967	3671	3272	3075	3037	3636	2953	3141	3615	3345	2891	3600	3197	38.93	38.56	44.47	42.39	40.45	38.63
SK1G00039510	MergePeak_207	quadrant5	no	2985	2633	2895	2855	2837	2693	3212	2642	3023	3039	2720	3161	2994	2422	2545	3980	3272	3606	2955	3022	3122	2876	3359	2380	2484	2587	2568	2967	3671	3272	3075	3037	3636	2953	3141	3615	3345	2891	3600	3197	38.93	38.56	44.47	42.39	40.45	38.63
SK1G00039512	MergePeak_208	quadrant5	no	64	44	28	39	47	50	32	37	50	50	49	41	52	47	47	41	51	60	43	36	66	48	67	73	74	94	82	70	60	71	59	56	79	59	70	74	78	90	85	80	2.89	2.23	1.49	2.01	2.32	2.49
SK1G00039519	MergePeak_209	quadrant5	no	549	419	498	380	476	419	427	429	563	549	583	607	721	572	565	817	752	907	774	840	752	759	1064	948	843	1045	938	893	1088	1192	1221	969	1241	952	1336	1392	1220	1243	1316	1225	22.38	19.18	23.91	17.64	21.21	18.79
SK1G00039521	MergePeak_210	quadrant5	no	2120	1727	1844	1666	1990	1828	2188	1684	1762	1825	1802	2039	1876	1390	1529	2490	1924	2197	1838	2100	1609	1832	1855	1203	1888	1391	1580	1631	2009	1987	1988	1642	1957	1680	1843	1889	1818	1513	2183	1777	75.02	68.62	76.85	67.1	76.97	71.14
SK1G00039521	MergePeak_211	quadrant5	no	2120	1727	1844	1666	1990	1828	2188	1684	1762	1825	1802	2039	1876	1390	1529	2490	1924	2197	1838	2100	1609	1832	1855	1203	1888	1391	1580	1631	2009	1987	1988	1642	1957	1680	1843	1889	1818	1513	2183	1777	75.02	68.62	76.85	67.1	76.97	71.14
SK1G00039522	MergePeak_212	quadrant5	no	98	88	90	84	58	73	91	65	84	85	54	65	64	68	68	110	79	107	78	84	99	94	112	81	24	46	67	86	111	100	101	68	104	74	94	115	76	73	130	106	3.34	3.37	3.62	3.26	2.16	2.74
SK1G00039523	MergePeak_213	quadrant5	no	2605	2572	2163	2443	2512	2326	2517	2259	2512	2251	2240	2711	2571	1951	2077	2785	2718	2911	2294	2598	2359	2387	2785	2103	1794	2029	2005	2313	2553	2761	2266	2261	2263	2213	2545	2817	2620	2688	2760	2809	90.33	100.14	88.33	96.42	95.21	88.7
SK1G00039523	MergePeak_214	quadrant5	no	2605	2572	2163	2443	2512	2326	2517	2259	2512	2251	2240	2711	2571	1951	2077	2785	2718	2911	2294	2598	2359	2387	2785	2103	1794	2029	2005	2313	2553	2761	2266	2261	2263	2213	2545	2817	2620	2688	2760	2809	90.33	100.14	88.33	96.42	95.21	88.7
SK1G00039523	MergePeak_215	quadrant5	no	2605	2572	2163	2443	2512	2326	2517	2259	2512	2251	2240	2711	2571	1951	2077	2785	2718	2911	2294	2598	2359	2387	2785	2103	1794	2029	2005	2313	2553	2761	2266	2261	2263	2213	2545	2817	2620	2688	2760	2809	90.33	100.14	88.33	96.42	95.21	88.7
SK1G00039525	MergePeak_216	quadrant2	no	258	206	420	341	316	325	431	446	604	674	502	746	872	790	679	988	816	1062	881	908	996	773	962	1283	761	1377	1259	986	836	1407	1342	1159	1207	820	1182	1229	1652	1800	1311	1102	5.78	5.18	11.08	8.69	7.73	8
SK1G00039525	MergePeak_217	quadrant2	no	258	206	420	341	316	325	431	446	604	674	502	746	872	790	679	988	816	1062	881	908	996	773	962	1283	761	1377	1259	986	836	1407	1342	1159	1207	820	1182	1229	1652	1800	1311	1102	5.78	5.18	11.08	8.69	7.73	8
SK1G00039527	MergePeak_218	quadrant5	no	3166	2554	2876	2704	2897	2790	3701	3083	2385	2470	2911	3549	3099	2160	2693	3943	3399	3571	2901	3152	2934	2786	3612	3019	3021	3267	3360	2938	3034	3042	3400	3336	3552	2460	3977	3562	3937	3087	4538	3807	154.66	140.09	165.46	150.35	154.7	149.89
SK1G00039527	MergePeak_219	quadrant5	no	3166	2554	2876	2704	2897	2790	3701	3083	2385	2470	2911	3549	3099	2160	2693	3943	3399	3571	2901	3152	2934	2786	3612	3019	3021	3267	3360	2938	3034	3042	3400	3336	3552	2460	3977	3562	3937	3087	4538	3807	154.66	140.09	165.46	150.35	154.7	149.89
SK1G00039528	MergePeak_220	quadrant5	no	209	172	196	170	198	247	189	151	176	226	154	208	222	227	264	289	317	347	186	284	269	250	285	224	176	108	140	194	246	247	176	244	173	190	175	261	219	153	269	228	11.76	10.87	12.99	10.89	12.18	15.29
SK1G00039528	MergePeak_221	quadrant5	no	209	172	196	170	198	247	189	151	176	226	154	208	222	227	264	289	317	347	186	284	269	250	285	224	176	108	140	194	246	247	176	244	173	190	175	261	219	153	269	228	11.76	10.87	12.99	10.89	12.18	15.29
SK1G00039528	MergePeak_222	quadrant5	no	209	172	196	170	198	247	189	151	176	226	154	208	222	227	264	289	317	347	186	284	269	250	285	224	176	108	140	194	246	247	176	244	173	190	175	261	219	153	269	228	11.76	10.87	12.99	10.89	12.18	15.29
SK1G00039531	MergePeak_223	quadrant5	no	58	31	57	54	43	42	58	62	71	65	65	72	74	61	65	82	81	107	64	79	78	85	106	91	100	136	106	96	87	116	98	102	101	92	124	118	144	113	119	141	3.62	2.17	4.19	3.83	2.93	2.88
SK1G00039533	MergePeak_224	quadrant5	no	1141	1347	788	1057	1095	1469	1075	908	925	831	881	1080	1142	1161	1045	1213	1423	1319	936	954	1085	1044	1182	1087	746	592	662	795	1256	1134	949	865	1103	927	915	1227	1182	1228	1347	1319	59.68	79.11	48.54	62.93	62.61	84.5
SK1G00039533	MergePeak_225	quadrant5	no	1141	1347	788	1057	1095	1469	1075	908	925	831	881	1080	1142	1161	1045	1213	1423	1319	936	954	1085	1044	1182	1087	746	592	662	795	1256	1134	949	865	1103	927	915	1227	1182	1228	1347	1319	59.68	79.11	48.54	62.93	62.61	84.5
SK1G00039535	MergePeak_226	quadrant5	no	720	555	680	561	650	661	796	651	639	641	562	775	805	719	657	855	719	742	773	836	593	693	775	681	593	670	614	664	804	861	732	702	795	773	751	975	668	947	1022	759	21.1	18.27	23.47	18.72	20.83	21.31
SK1G00039535	MergePeak_227	quadrant5	no	720	555	680	561	650	661	796	651	639	641	562	775	805	719	657	855	719	742	773	836	593	693	775	681	593	670	614	664	804	861	732	702	795	773	751	975	668	947	1022	759	21.1	18.27	23.47	18.72	20.83	21.31
SK1G00039539	MergePeak_228	quadrant5	no	194	177	211	168	195	198	233	195	192	191	158	212	228	179	219	273	225	334	203	205	222	191	304	342	324	386	400	320	295	366	331	282	322	301	422	361	298	435	401	416	5.94	6.09	7.61	5.86	6.53	6.67
SK1G00039539	MergePeak_229	quadrant5	no	194	177	211	168	195	198	233	195	192	191	158	212	228	179	219	273	225	334	203	205	222	191	304	342	324	386	400	320	295	366	331	282	322	301	422	361	298	435	401	416	5.94	6.09	7.61	5.86	6.53	6.67
SK1G00039540	MergePeak_230	quadrant5	no	257	249	306	201	205	226	198	161	282	275	249	254	241	210	221	295	251	298	287	249	220	274	320	324	261	291	237	279	276	255	363	352	388	232	339	345	389	281	354	325	12.95	14.09	18.16	11.53	11.29	12.53
SK1G00039540	MergePeak_231	quadrant5	no	257	249	306	201	205	226	198	161	282	275	249	254	241	210	221	295	251	298	287	249	220	274	320	324	261	291	237	279	276	255	363	352	388	232	339	345	389	281	354	325	12.95	14.09	18.16	11.53	11.29	12.53
SK1G00039541	MergePeak_232	quadrant5	no	162	159	123	121	141	123	143	103	135	108	114	125	153	125	119	112	128	140	118	125	86	117	122	77	64	85	84	97	125	102	82	89	78	67	82	119	101	86	85	112	5.88	6.48	5.25	5	5.59	4.91
SK1G00039541	MergePeak_233	quadrant5	no	162	159	123	121	141	123	143	103	135	108	114	125	153	125	119	112	128	140	118	125	86	117	122	77	64	85	84	97	125	102	82	89	78	67	82	119	101	86	85	112	5.88	6.48	5.25	5	5.59	4.91
SK1G00039541	MergePeak_234	quadrant5	no	162	159	123	121	141	123	143	103	135	108	114	125	153	125	119	112	128	140	118	125	86	117	122	77	64	85	84	97	125	102	82	89	78	67	82	119	101	86	85	112	5.88	6.48	5.25	5	5.59	4.91
SK1G00039542	MergePeak_235	quadrant5	no	5	3	9	8	14	16	13	14	30	45	37	54	28	22	16	45	25	25	60	36	52	42	16	26	19	13	18	23	35	16	45	50	14	22	27	28	58	22	50	26	0.12	0.08	0.25	0.21	0.36	0.41
SK1G00039543	MergePeak_236	quadrant5	no	10751	9181	12667	12457	11307	10668	14365	11353	12664	12031	10105	15758	11194	9507	10637	15696	11994	14042	12241	12316	12477	10391	12267	9784	11343	12058	12808	11296	11145	12120	11498	11698	13299	9549	11170	12734	16876	12038	14410	13718	134.3	128.79	186.37	177.13	154.4	146.57
SK1G00039543	MergePeak_237	quadrant5	no	10751	9181	12667	12457	11307	10668	14365	11353	12664	12031	10105	15758	11194	9507	10637	15696	11994	14042	12241	12316	12477	10391	12267	9784	11343	12058	12808	11296	11145	12120	11498	11698	13299	9549	11170	12734	16876	12038	14410	13718	134.3	128.79	186.37	177.13	154.4	146.57
SK1G00039543	MergePeak_238	quadrant5	no	10751	9181	12667	12457	11307	10668	14365	11353	12664	12031	10105	15758	11194	9507	10637	15696	11994	14042	12241	12316	12477	10391	12267	9784	11343	12058	12808	11296	11145	12120	11498	11698	13299	9549	11170	12734	16876	12038	14410	13718	134.3	128.79	186.37	177.13	154.4	146.57
SK1G00039547	MergePeak_239	quadrant5	no	30	39	27	39	46	41	43	26	53	32	40	44	54	57	41	56	69	70	50	45	33	49	71	55	69	44	49	56	65	59	75	46	66	54	75	73	49	74	68	80	1.02	1.48	1.08	1.5	1.7	1.53
SK1G00039548	MergePeak_240	quadrant5	no	35	35	28	56	67	107	56	36	50	17	28	29	125	44	57	85	81	86	58	18	47	43	49	67	55	33	43	27	45	64	33	21	33	23	47	32	26	55	38	74	5.11	5.73	4.81	9.3	10.68	17.16
SK1G00039549	MergePeak_241	quadrant5	no	137	51	84	65	88	59	76	60	67	75	59	94	81	59	45	88	102	79	64	72	38	68	89	43	31	34	36	42	61	84	73	66	45	56	50	94	78	39	43	86	3.56	1.49	2.57	1.92	2.5	1.68
SK1G00039550	MergePeak_242	quadrant5	no	863	690	859	824	697	648	813	686	751	756	752	826	1014	741	610	996	762	859	611	917	742	825	876	727	694	777	701	774	883	988	898	890	892	843	984	1071	930	809	1009	850	45.68	41.01	53.55	49.64	40.33	37.72
SK1G00039550	MergePeak_243	quadrant5	no	863	690	859	824	697	648	813	686	751	756	752	826	1014	741	610	996	762	859	611	917	742	825	876	727	694	777	701	774	883	988	898	890	892	843	984	1071	930	809	1009	850	45.68	41.01	53.55	49.64	40.33	37.72
SK1G00039551	MergePeak_244	quadrant5	no	1200	2060	792	1843	1412	1940	1654	1201	1097	816	1138	917	1353	1159	1158	1119	1094	1142	1192	890	1119	754	1346	801	622	827	955	613	949	850	670	657	691	720	757	757	1084	862	832	1078	19.6	37.77	15.23	34.26	25.21	34.84
SK1G00039551	MergePeak_245	quadrant5	no	1200	2060	792	1843	1412	1940	1654	1201	1097	816	1138	917	1353	1159	1158	1119	1094	1142	1192	890	1119	754	1346	801	622	827	955	613	949	850	670	657	691	720	757	757	1084	862	832	1078	19.6	37.77	15.23	34.26	25.21	34.84
SK1G00039551	MergePeak_246	quadrant5	no	1200	2060	792	1843	1412	1940	1654	1201	1097	816	1138	917	1353	1159	1158	1119	1094	1142	1192	890	1119	754	1346	801	622	827	955	613	949	850	670	657	691	720	757	757	1084	862	832	1078	19.6	37.77	15.23	34.26	25.21	34.84
SK1G00039552	MergePeak_247	quadrant5	no	61	191	36	118	91	144	69	57	77	21	54	45	115	106	67	83	78	118	56	58	81	35	100	79	49	56	59	50	96	67	44	59	59	67	68	48	41	89	80	90	1.9	6.67	1.32	4.18	3.09	4.93
SK1G00039553	MergePeak_248	quadrant5	no	1086	1330	1064	1427	1443	1427	1305	1172	1302	1135	1174	1183	1802	1974	1466	1570	1501	1740	1594	1550	1594	1725	2548	2638	2031	2943	2773	1945	2274	2493	2108	1821	2315	1984	2139	2611	2519	3332	2484	2813	40.53	55.73	46.77	60.62	58.87	58.57
SK1G00039553	MergePeak_249	quadrant5	no	1086	1330	1064	1427	1443	1427	1305	1172	1302	1135	1174	1183	1802	1974	1466	1570	1501	1740	1594	1550	1594	1725	2548	2638	2031	2943	2773	1945	2274	2493	2108	1821	2315	1984	2139	2611	2519	3332	2484	2813	40.53	55.73	46.77	60.62	58.87	58.57
SK1G00039554	MergePeak_250	quadrant5	no	119	164	119	127	133	128	141	104	132	123	92	113	141	152	105	117	139	136	105	130	110	123	132	131	87	117	146	93	106	154	98	115	119	113	125	163	123	148	141	127	7.15	11.07	8.42	8.69	8.74	8.46
SK1G00039555	MergePeak_251	quadrant5	no	222	216	179	172	243	210	227	177	194	164	163	164	214	177	188	290	240	228	159	204	168	199	227	176	191	165	174	168	213	194	197	180	201	195	212	295	212	252	256	269	23.46	25.63	22.28	20.69	28.07	24.41
SK1G00039556	MergePeak_252	quadrant5	no	1083	1030	1217	1292	1226	1545	1653	1151	1230	1244	1220	1347	1545	1528	1228	1788	1425	1904	1561	1291	1613	1250	1468	1660	1485	2172	2016	1342	1433	1593	1645	1361	1888	1124	1469	1625	2092	2154	1877	1820	34.3	36.63	45.39	46.57	42.44	53.81
SK1G00039556	MergePeak_253	quadrant5	no	1083	1030	1217	1292	1226	1545	1653	1151	1230	1244	1220	1347	1545	1528	1228	1788	1425	1904	1561	1291	1613	1250	1468	1660	1485	2172	2016	1342	1433	1593	1645	1361	1888	1124	1469	1625	2092	2154	1877	1820	34.3	36.63	45.39	46.57	42.44	53.81
SK1G00039558	MergePeak_254	quadrant5	no	9	15	12	9	12	11	11	16	11	3	10	19	11	7	8	21	10	13	22	7	21	15	16	38	13	22	12	19	30	16	28	13	26	9	30	27	22	43	29	17	0.72	1.34	1.13	0.82	1.04	0.96
SK1G00039560	MergePeak_255	quadrant5	no	136	91	122	89	121	138	140	139	114	113	107	144	119	141	116	192	146	174	136	173	142	202	268	220	175	229	224	223	264	270	225	187	246	189	246	252	223	226	252	245	9.55	7.17	10.09	7.11	9.29	10.66
SK1G00039562	MergePeak_256	quadrant5	no	877	723	1041	949	952	956	965	958	1281	1312	1168	1433	1368	1285	1269	1746	1459	1884	1514	1743	1686	1730	2324	2189	2064	2373	2327	1990	2088	2161	2145	1988	2266	1777	2336	2486	2604	2245	2269	2681	11.35	10.5	15.86	13.97	13.46	13.6
SK1G00039562	MergePeak_257	quadrant5	no	877	723	1041	949	952	956	965	958	1281	1312	1168	1433	1368	1285	1269	1746	1459	1884	1514	1743	1686	1730	2324	2189	2064	2373	2327	1990	2088	2161	2145	1988	2266	1777	2336	2486	2604	2245	2269	2681	11.35	10.5	15.86	13.97	13.46	13.6
SK1G00039562	MergePeak_258	quadrant5	no	877	723	1041	949	952	956	965	958	1281	1312	1168	1433	1368	1285	1269	1746	1459	1884	1514	1743	1686	1730	2324	2189	2064	2373	2327	1990	2088	2161	2145	1988	2266	1777	2336	2486	2604	2245	2269	2681	11.35	10.5	15.86	13.97	13.46	13.6
SK1G00039565	MergePeak_259	quadrant5	no	683	601	644	655	733	603	737	659	680	622	659	785	734	716	689	1002	878	867	679	804	670	754	853	690	585	615	588	694	775	844	790	702	827	733	706	1029	914	894	1011	833	14.02	13.85	15.57	15.3	16.45	13.61
SK1G00039565	MergePeak_260	quadrant5	no	683	601	644	655	733	603	737	659	680	622	659	785	734	716	689	1002	878	867	679	804	670	754	853	690	585	615	588	694	775	844	790	702	827	733	706	1029	914	894	1011	833	14.02	13.85	15.57	15.3	16.45	13.61
SK1G00039566	MergePeak_261	quadrant5	no	330	223	296	274	315	238	280	301	357	334	378	481	471	344	408	521	441	559	468	487	396	479	634	515	424	584	446	420	542	545	481	464	573	504	558	677	593	603	625	630	19.6	14.87	20.71	18.53	20.45	15.55
SK1G00039566	MergePeak_262	quadrant5	no	330	223	296	274	315	238	280	301	357	334	378	481	471	344	408	521	441	559	468	487	396	479	634	515	424	584	446	420	542	545	481	464	573	504	558	677	593	603	625	630	19.6	14.87	20.71	18.53	20.45	15.55
SK1G00039568	MergePeak_263	quadrant5	no	1707	1567	1635	1441	1467	1511	1501	1219	1698	1739	1604	1903	2161	1943	1697	2383	2097	2692	2221	2353	2311	2305	3122	3111	2655	2953	2879	2949	3206	3654	3226	2845	3430	2809	3532	3914	3366	3943	3506	3709	21.58	22.25	24.35	20.74	20.28	21.01
SK1G00039569	MergePeak_263	quadrant5	no	1340	1005	1071	804	1024	864	799	738	886	876	817	815	1005	1038	730	1195	1083	1360	1010	1170	939	1183	1512	1373	1300	1362	1151	1304	1611	1609	1411	1186	1639	1393	1978	1767	1403	1731	1704	1869	14.2	11.96	13.37	9.7	11.86	10.07
SK1G00039569	MergePeak_264	quadrant5	no	1340	1005	1071	804	1024	864	799	738	886	876	817	815	1005	1038	730	1195	1083	1360	1010	1170	939	1183	1512	1373	1300	1362	1151	1304	1611	1609	1411	1186	1639	1393	1978	1767	1403	1731	1704	1869	14.2	11.96	13.37	9.7	11.86	10.07
SK1G00039569	MergePeak_265	quadrant5	no	1340	1005	1071	804	1024	864	799	738	886	876	817	815	1005	1038	730	1195	1083	1360	1010	1170	939	1183	1512	1373	1300	1362	1151	1304	1611	1609	1411	1186	1639	1393	1978	1767	1403	1731	1704	1869	14.2	11.96	13.37	9.7	11.86	10.07
SK1G00039569	MergePeak_266	quadrant5	no	1340	1005	1071	804	1024	864	799	738	886	876	817	815	1005	1038	730	1195	1083	1360	1010	1170	939	1183	1512	1373	1300	1362	1151	1304	1611	1609	1411	1186	1639	1393	1978	1767	1403	1731	1704	1869	14.2	11.96	13.37	9.7	11.86	10.07
SK1G00039569	MergePeak_267	quadrant5	no	1340	1005	1071	804	1024	864	799	738	886	876	817	815	1005	1038	730	1195	1083	1360	1010	1170	939	1183	1512	1373	1300	1362	1151	1304	1611	1609	1411	1186	1639	1393	1978	1767	1403	1731	1704	1869	14.2	11.96	13.37	9.7	11.86	10.07
SK1G00039569	MergePeak_268	quadrant5	no	1340	1005	1071	804	1024	864	799	738	886	876	817	815	1005	1038	730	1195	1083	1360	1010	1170	939	1183	1512	1373	1300	1362	1151	1304	1611	1609	1411	1186	1639	1393	1978	1767	1403	1731	1704	1869	14.2	11.96	13.37	9.7	11.86	10.07
SK1G00039569	MergePeak_269	quadrant5	no	1340	1005	1071	804	1024	864	799	738	886	876	817	815	1005	1038	730	1195	1083	1360	1010	1170	939	1183	1512	1373	1300	1362	1151	1304	1611	1609	1411	1186	1639	1393	1978	1767	1403	1731	1704	1869	14.2	11.96	13.37	9.7	11.86	10.07
SK1G00039570	MergePeak_270	quadrant5	no	356	260	413	294	320	283	263	252	330	275	300	374	378	331	286	469	414	462	324	427	338	358	479	457	400	462	396	386	470	490	435	400	475	403	418	587	489	547	573	516	15.11	12.39	20.64	14.2	14.85	13.21
SK1G00039572	MergePeak_271	quadrant5	no	608	764	449	585	714	738	529	523	557	436	493	603	616	697	639	823	840	852	564	615	744	647	797	801	648	459	424	481	704	711	634	654	609	543	575	807	666	717	730	874	19.74	27.85	17.17	21.62	25.34	26.35
SK1G00039572	MergePeak_272	quadrant5	no	608	764	449	585	714	738	529	523	557	436	493	603	616	697	639	823	840	852	564	615	744	647	797	801	648	459	424	481	704	711	634	654	609	543	575	807	666	717	730	874	19.74	27.85	17.17	21.62	25.34	26.35
SK1G00039574	MergePeak_273	quadrant5	no	423	412	328	356	392	363	397	341	348	402	382	410	516	396	356	421	484	563	435	502	409	484	583	527	416	499	407	478	537	564	523	477	503	517	604	642	558	546	621	646	18.68	20.43	17.06	17.9	18.92	17.63
SK1G00039576	MergePeak_274	quadrant5	no	1465	1268	1285	1252	1601	1546	1502	1533	1488	1261	1510	1700	2308	1872	1806	2269	2398	2528	2135	2375	2486	2104	3027	2827	2336	2902	2655	2584	3020	3256	2338	2332	2594	2560	2656	3023	2951	3290	3329	3641	25.24	24.53	26.08	24.56	30.16	29.3
SK1G00039576	MergePeak_275	quadrant5	no	1465	1268	1285	1252	1601	1546	1502	1533	1488	1261	1510	1700	2308	1872	1806	2269	2398	2528	2135	2375	2486	2104	3027	2827	2336	2902	2655	2584	3020	3256	2338	2332	2594	2560	2656	3023	2951	3290	3329	3641	25.24	24.53	26.08	24.56	30.16	29.3
SK1G00039576	MergePeak_276	quadrant5	no	1465	1268	1285	1252	1601	1546	1502	1533	1488	1261	1510	1700	2308	1872	1806	2269	2398	2528	2135	2375	2486	2104	3027	2827	2336	2902	2655	2584	3020	3256	2338	2332	2594	2560	2656	3023	2951	3290	3329	3641	25.24	24.53	26.08	24.56	30.16	29.3
SK1G00039576	MergePeak_277	quadrant5	no	1465	1268	1285	1252	1601	1546	1502	1533	1488	1261	1510	1700	2308	1872	1806	2269	2398	2528	2135	2375	2486	2104	3027	2827	2336	2902	2655	2584	3020	3256	2338	2332	2594	2560	2656	3023	2951	3290	3329	3641	25.24	24.53	26.08	24.56	30.16	29.3
SK1G00039577	MergePeak_278	quadrant5	no	854	798	925	1017	1013	913	1152	933	1091	1062	877	991	1161	988	936	1293	1019	1116	957	1105	914	952	1019	1027	806	1062	1084	901	935	1060	941	998	1193	854	967	1212	1200	1186	1204	1028	16.24	17.04	20.71	22.01	21.05	19.09
SK1G00039577	MergePeak_279	quadrant5	no	854	798	925	1017	1013	913	1152	933	1091	1062	877	991	1161	988	936	1293	1019	1116	957	1105	914	952	1019	1027	806	1062	1084	901	935	1060	941	998	1193	854	967	1212	1200	1186	1204	1028	16.24	17.04	20.71	22.01	21.05	19.09
SK1G00039577	MergePeak_280	quadrant5	no	854	798	925	1017	1013	913	1152	933	1091	1062	877	991	1161	988	936	1293	1019	1116	957	1105	914	952	1019	1027	806	1062	1084	901	935	1060	941	998	1193	854	967	1212	1200	1186	1204	1028	16.24	17.04	20.71	22.01	21.05	19.09
SK1G00039579	MergePeak_281	quadrant5	no	1028	843	849	890	963	895	1075	821	953	929	932	1087	1147	1091	930	1269	1165	1337	1179	1217	1203	1220	1589	1568	1250	1435	1311	1308	1502	1564	1377	1203	1563	1369	1533	1612	1518	1674	1676	1713	29.27	26.96	28.47	28.85	29.98	28.03
SK1G00039579	MergePeak_282	quadrant5	no	1028	843	849	890	963	895	1075	821	953	929	932	1087	1147	1091	930	1269	1165	1337	1179	1217	1203	1220	1589	1568	1250	1435	1311	1308	1502	1564	1377	1203	1563	1369	1533	1612	1518	1674	1676	1713	29.27	26.96	28.47	28.85	29.98	28.03
SK1G00039581	MergePeak_283	quadrant5	no	48	35	36	28	57	123	90	90	72	58	64	70	159	83	98	86	129	103	66	72	135	61	85	107	120	90	103	69	78	70	50	50	60	96	63	92	98	79	70	109	7.53	6.17	6.65	5	9.78	21.23
SK1G00039582	MergePeak_284	quadrant5	no	141	150	137	154	259	275	128	217	275	263	211	312	375	306	235	320	382	278	304	368	279	200	310	172	249	349	238	256	195	446	270	258	226	231	239	386	244	188	203	330	2.25	2.69	2.57	2.8	4.51	4.82
SK1G00039583	MergePeak_285	quadrant5	no	298	278	314	283	323	290	311	268	289	241	255	398	325	244	239	379	353	344	295	295	274	298	338	269	208	274	248	227	340	337	302	297	323	287	353	356	296	392	352	337	29.72	31.13	36.88	32.13	35.22	31.81
SK1G00039583	MergePeak_286	quadrant5	no	298	278	314	283	323	290	311	268	289	241	255	398	325	244	239	379	353	344	295	295	274	298	338	269	208	274	248	227	340	337	302	297	323	287	353	356	296	392	352	337	29.72	31.13	36.88	32.13	35.22	31.81
SK1G00039585	MergePeak_287	quadrant2	no	0	0	0	0	1	1	0	0	0	0	0	0	0	0	0	0	0	0	0	0	0	2	1	1	3	2	3	2	1	0	6	5	5	3	1	3	1	5	3	0	0	0	0	0	0.27	0.27
SK1G00039586	MergePeak_288	quadrant5	no	38	92	20	48	60	65	58	78	111	75	60	95	135	93	114	119	94	135	83	107	154	109	114	120	67	182	126	98	83	87	55	54	101	67	86	80	94	89	83	136	1.93	5.26	1.2	2.78	3.34	3.64
SK1G00039591	MergePeak_289	quadrant5	no	139	172	107	86	146	125	147	142	139	130	126	122	166	115	171	176	161	227	186	121	226	174	204	248	196	226	159	236	238	200	245	158	259	166	243	239	194	272	190	298	7.38	10.26	6.69	5.2	8.48	7.3
SK1G00039592	MergePeak_290	quadrant5	no	674	465	681	526	593	523	651	602	722	645	688	939	869	665	643	1004	901	961	891	1006	724	966	1173	945	927	937	895	946	1042	1166	1102	909	1131	975	998	1190	1120	1129	1198	1049	36.87	28.56	43.87	32.75	35.46	31.46
SK1G00039592	MergePeak_291	quadrant5	no	674	465	681	526	593	523	651	602	722	645	688	939	869	665	643	1004	901	961	891	1006	724	966	1173	945	927	937	895	946	1042	1166	1102	909	1131	975	998	1190	1120	1129	1198	1049	36.87	28.56	43.87	32.75	35.46	31.46
SK1G00039594	MergePeak_292	quadrant5	no	364	372	445	411	370	438	456	391	421	426	442	497	501	445	431	616	570	544	539	501	497	433	582	481	514	594	546	497	547	570	513	495	611	441	579	608	546	613	659	686	11.6	13.31	16.7	14.91	12.89	15.35
SK1G00039594	MergePeak_293	quadrant5	no	364	372	445	411	370	438	456	391	421	426	442	497	501	445	431	616	570	544	539	501	497	433	582	481	514	594	546	497	547	570	513	495	611	441	579	608	546	613	659	686	11.6	13.31	16.7	14.91	12.89	15.35
SK1G00039594	MergePeak_294	quadrant5	no	364	372	445	411	370	438	456	391	421	426	442	497	501	445	431	616	570	544	539	501	497	433	582	481	514	594	546	497	547	570	513	495	611	441	579	608	546	613	659	686	11.6	13.31	16.7	14.91	12.89	15.35
SK1G00039595	MergePeak_295	quadrant5	no	653	558	617	562	584	511	642	540	646	546	457	725	717	536	527	766	625	752	669	718	607	612	728	728	597	779	701	642	678	769	714	575	760	609	794	877	817	879	916	788	10.3	9.88	11.46	10.09	10.07	8.87
SK1G00039595	MergePeak_296	quadrant5	no	653	558	617	562	584	511	642	540	646	546	457	725	717	536	527	766	625	752	669	718	607	612	728	728	597	779	701	642	678	769	714	575	760	609	794	877	817	879	916	788	10.3	9.88	11.46	10.09	10.07	8.87
SK1G00039595	MergePeak_297	quadrant5	no	653	558	617	562	584	511	642	540	646	546	457	725	717	536	527	766	625	752	669	718	607	612	728	728	597	779	701	642	678	769	714	575	760	609	794	877	817	879	916	788	10.3	9.88	11.46	10.09	10.07	8.87
SK1G00039597	MergePeak_298	quadrant5	no	11	12	19	17	16	5	23	14	12	12	8	11	20	11	9	13	11	9	4	16	20	9	21	15	33	25	35	25	19	22	17	22	15	24	28	25	18	27	21	20	0.33	0.44	0.66	0.58	0.42	0.12
SK1G00039598	MergePeak_298	quadrant5	no	1532	1298	1499	1556	1527	1452	1787	1483	1631	1545	1601	1736	1892	1713	1456	2278	1878	2311	1851	1828	1869	1688	2176	2045	1843	2120	2018	1953	2377	2281	2122	1960	2447	1952	2275	2620	2427	2468	2720	2315	29.97	28.51	34.54	34.65	32.66	31.24
SK1G00039598	MergePeak_299	quadrant5	no	1532	1298	1499	1556	1527	1452	1787	1483	1631	1545	1601	1736	1892	1713	1456	2278	1878	2311	1851	1828	1869	1688	2176	2045	1843	2120	2018	1953	2377	2281	2122	1960	2447	1952	2275	2620	2427	2468	2720	2315	29.97	28.51	34.54	34.65	32.66	31.24
SK1G00039598	MergePeak_300	quadrant5	no	1532	1298	1499	1556	1527	1452	1787	1483	1631	1545	1601	1736	1892	1713	1456	2278	1878	2311	1851	1828	1869	1688	2176	2045	1843	2120	2018	1953	2377	2281	2122	1960	2447	1952	2275	2620	2427	2468	2720	2315	29.97	28.51	34.54	34.65	32.66	31.24
SK1G00039599	MergePeak_301	quadrant5	no	964	877	1001	789	961	812	804	765	1003	882	871	1365	1321	1293	1297	1660	1739	2046	1163	1651	1474	1463	2174	1782	2095	1387	1270	1546	1978	2230	1846	1788	1941	1686	1875	2133	2028	1876	2378	2387	27.91	28.51	34.14	26	30.42	25.86
SK1G00039599	MergePeak_302	quadrant5	no	964	877	1001	789	961	812	804	765	1003	882	871	1365	1321	1293	1297	1660	1739	2046	1163	1651	1474	1463	2174	1782	2095	1387	1270	1546	1978	2230	1846	1788	1941	1686	1875	2133	2028	1876	2378	2387	27.91	28.51	34.14	26	30.42	25.86
SK1G00039599	MergePeak_303	quadrant5	no	964	877	1001	789	961	812	804	765	1003	882	871	1365	1321	1293	1297	1660	1739	2046	1163	1651	1474	1463	2174	1782	2095	1387	1270	1546	1978	2230	1846	1788	1941	1686	1875	2133	2028	1876	2378	2387	27.91	28.51	34.14	26	30.42	25.86
SK1G00039600	MergePeak_304	quadrant5	no	340	301	332	281	321	294	316	264	293	268	290	331	361	337	262	386	368	395	348	323	312	359	430	410	333	395	334	307	383	456	371	311	377	350	468	499	382	418	492	481	31.34	31.16	36.05	29.49	32.35	29.81
SK1G00039600	MergePeak_305	quadrant5	no	340	301	332	281	321	294	316	264	293	268	290	331	361	337	262	386	368	395	348	323	312	359	430	410	333	395	334	307	383	456	371	311	377	350	468	499	382	418	492	481	31.34	31.16	36.05	29.49	32.35	29.81
SK1G00039601	MergePeak_306	quadrant5	no	1225	1013	1325	863	1211	1009	1156	960	1162	1172	1021	1360	1415	1300	1036	1518	1271	1651	1248	1587	1088	1658	2032	1754	1570	1779	1516	1582	1942	2200	1830	1650	1885	1718	1991	2187	1808	2272	2337	1959	66.02	61.3	84.1	52.94	71.34	59.8
SK1G00039601	MergePeak_307	quadrant5	no	1225	1013	1325	863	1211	1009	1156	960	1162	1172	1021	1360	1415	1300	1036	1518	1271	1651	1248	1587	1088	1658	2032	1754	1570	1779	1516	1582	1942	2200	1830	1650	1885	1718	1991	2187	1808	2272	2337	1959	66.02	61.3	84.1	52.94	71.34	59.8
SK1G00039603	MergePeak_308	quadrant5	no	2795	2825	1975	2316	2144	2353	2006	1902	1957	1836	1664	2052	2014	1931	1657	2120	2386	2295	1678	1648	1730	1535	1751	1562	1003	968	862	1196	1567	1635	1315	1241	1267	1213	1253	1511	1327	1401	1483	1785	85.05	96.53	70.78	80.22	71.32	78.75
SK1G00039603	MergePeak_309	quadrant5	no	2795	2825	1975	2316	2144	2353	2006	1902	1957	1836	1664	2052	2014	1931	1657	2120	2386	2295	1678	1648	1730	1535	1751	1562	1003	968	862	1196	1567	1635	1315	1241	1267	1213	1253	1511	1327	1401	1483	1785	85.05	96.53	70.78	80.22	71.32	78.75
SK1G00039604	MergePeak_310	quadrant5	no	1279	695	1087	746	907	564	701	723	817	667	389	1065	818	380	514	903	787	856	549	635	689	551	745	439	564	370	255	445	490	536	825	628	444	555	691	733	627	585	599	561	54.21	33.08	54.26	35.99	42.02	26.29
SK1G00039604	MergePeak_311	quadrant5	no	1279	695	1087	746	907	564	701	723	817	667	389	1065	818	380	514	903	787	856	549	635	689	551	745	439	564	370	255	445	490	536	825	628	444	555	691	733	627	585	599	561	54.21	33.08	54.26	35.99	42.02	26.29
SK1G00039604	MergePeak_312	quadrant5	no	1279	695	1087	746	907	564	701	723	817	667	389	1065	818	380	514	903	787	856	549	635	689	551	745	439	564	370	255	445	490	536	825	628	444	555	691	733	627	585	599	561	54.21	33.08	54.26	35.99	42.02	26.29
SK1G00039604	MergePeak_313	quadrant5	no	1279	695	1087	746	907	564	701	723	817	667	389	1065	818	380	514	903	787	856	549	635	689	551	745	439	564	370	255	445	490	536	825	628	444	555	691	733	627	585	599	561	54.21	33.08	54.26	35.99	42.02	26.29
SK1G00039605	MergePeak_312	quadrant5	no	795	601	718	619	770	633	577	535	676	584	542	673	670	621	604	886	884	832	578	621	645	587	675	572	435	414	374	436	576	700	518	521	559	507	574	678	571	665	739	775	17.22	14.62	18.32	15.26	18.24	15.08
SK1G00039605	MergePeak_313	quadrant5	no	795	601	718	619	770	633	577	535	676	584	542	673	670	621	604	886	884	832	578	621	645	587	675	572	435	414	374	436	576	700	518	521	559	507	574	678	571	665	739	775	17.22	14.62	18.32	15.26	18.24	15.08
SK1G00039605	MergePeak_314	quadrant5	no	795	601	718	619	770	633	577	535	676	584	542	673	670	621	604	886	884	832	578	621	645	587	675	572	435	414	374	436	576	700	518	521	559	507	574	678	571	665	739	775	17.22	14.62	18.32	15.26	18.24	15.08
SK1G00039605	MergePeak_315	quadrant5	no	795	601	718	619	770	633	577	535	676	584	542	673	670	621	604	886	884	832	578	621	645	587	675	572	435	414	374	436	576	700	518	521	559	507	574	678	571	665	739	775	17.22	14.62	18.32	15.26	18.24	15.08
SK1G00039606	MergePeak_316	quadrant5	no	1906	1624	1511	1340	1406	1458	1453	1207	1225	1171	1185	1193	1233	1050	1093	1601	1344	1573	1171	1262	1231	1230	1442	1273	1083	1175	1120	1066	1680	1456	1264	1241	1543	1259	1432	1354	1391	1446	1672	1597	39.82	38.1	37.18	31.87	32.11	33.5
SK1G00039606	MergePeak_317	quadrant5	no	1906	1624	1511	1340	1406	1458	1453	1207	1225	1171	1185	1193	1233	1050	1093	1601	1344	1573	1171	1262	1231	1230	1442	1273	1083	1175	1120	1066	1680	1456	1264	1241	1543	1259	1432	1354	1391	1446	1672	1597	39.82	38.1	37.18	31.87	32.11	33.5
SK1G00039606	MergePeak_318	quadrant5	no	1906	1624	1511	1340	1406	1458	1453	1207	1225	1171	1185	1193	1233	1050	1093	1601	1344	1573	1171	1262	1231	1230	1442	1273	1083	1175	1120	1066	1680	1456	1264	1241	1543	1259	1432	1354	1391	1446	1672	1597	39.82	38.1	37.18	31.87	32.11	33.5
SK1G00039606	MergePeak_319	quadrant5	no	1906	1624	1511	1340	1406	1458	1453	1207	1225	1171	1185	1193	1233	1050	1093	1601	1344	1573	1171	1262	1231	1230	1442	1273	1083	1175	1120	1066	1680	1456	1264	1241	1543	1259	1432	1354	1391	1446	1672	1597	39.82	38.1	37.18	31.87	32.11	33.5
SK1G00039607	MergePeak_320	quadrant5	no	482	408	496	606	494	504	625	566	658	638	616	857	615	625	604	831	647	785	715	718	764	605	810	729	666	805	794	640	691	673	775	644	786	531	657	785	968	778	835	759	23.42	22.26	28.38	33.51	26.23	26.93
SK1G00039607	MergePeak_321	quadrant5	no	482	408	496	606	494	504	625	566	658	638	616	857	615	625	604	831	647	785	715	718	764	605	810	729	666	805	794	640	691	673	775	644	786	531	657	785	968	778	835	759	23.42	22.26	28.38	33.51	26.23	26.93
SK1G00039608	MergePeak_322	quadrant5	no	2514	1971	1663	2003	1778	1945	1861	1712	1479	1606	1367	1373	1375	1362	1218	1785	1463	1596	1394	1354	1168	1313	1223	1140	776	840	852	830	1239	1141	1251	1146	1299	967	1213	1336	1105	1173	1064	1266	47.29	41.64	36.85	42.89	36.56	40.24
SK1G00039609	MergePeak_323	quadrant5	no	117	69	134	82	98	75	72	82	91	82	51	83	72	56	67	129	107	95	63	103	78	80	107	62	130	66	56	85	76	100	142	63	73	100	142	152	102	75	105	102	4.14	2.74	5.58	3.3	3.79	2.92
SK1G00039611	MergePeak_324	quadrant5	no	1761	1525	1590	1478	1816	1514	1567	1571	1645	1567	1498	1933	1902	1732	1536	2166	1945	2253	1799	1925	1886	2023	2547	2128	1927	1758	1483	1697	2164	1999	1930	1720	2066	1942	2013	2184	2095	2074	2293	2289	109.75	106.72	116.71	104.85	123.72	103.77
SK1G00039611	MergePeak_325	quadrant5	no	1761	1525	1590	1478	1816	1514	1567	1571	1645	1567	1498	1933	1902	1732	1536	2166	1945	2253	1799	1925	1886	2023	2547	2128	1927	1758	1483	1697	2164	1999	1930	1720	2066	1942	2013	2184	2095	2074	2293	2289	109.75	106.72	116.71	104.85	123.72	103.77
SK1G00039612	MergePeak_326	quadrant5	no	4	2	1	1	5	3	4	2	2	6	1	2	6	1	1	10	7	3	2	6	3	4	2	3	5	1	1	1	1	2	2	11	2	5	5	6	3	6	1	4	0.81	0.46	0.24	0.23	1.11	0.67
SK1G00039613	MergePeak_327	quadrant8	no	93	152	87	77	126	111	101	64	59	52	42	56	81	58	43	65	64	64	46	53	62	65	57	54	32	41	53	46	55	50	32	29	55	49	53	32	50	83	77	79	3.87	7.1	4.26	3.65	5.73	5.08
SK1G00039618	MergePeak_328	quadrant4	no	1736	1797	996	1455	1352	1908	1536	1136	1086	1083	1159	1152	1277	1155	962	1430	1476	1338	1269	1113	1293	1089	1392	1289	857	1033	885	919	1366	1257	1010	949	1029	959	1096	1201	1095	1442	1267	1477	64.4	74.85	43.52	61.44	54.83	77.84
SK1G00039618	MergePeak_329	quadrant5	no	1736	1797	996	1455	1352	1908	1536	1136	1086	1083	1159	1152	1277	1155	962	1430	1476	1338	1269	1113	1293	1089	1392	1289	857	1033	885	919	1366	1257	1010	949	1029	959	1096	1201	1095	1442	1267	1477	64.4	74.85	43.52	61.44	54.83	77.84
SK1G00039618	MergePeak_330	quadrant5	no	1736	1797	996	1455	1352	1908	1536	1136	1086	1083	1159	1152	1277	1155	962	1430	1476	1338	1269	1113	1293	1089	1392	1289	857	1033	885	919	1366	1257	1010	949	1029	959	1096	1201	1095	1442	1267	1477	64.4	74.85	43.52	61.44	54.83	77.84
SK1G00039622	MergePeak_331	quadrant5	no	1416	1307	1532	1413	1502	1389	1579	1276	1408	1362	1182	1542	1544	1347	1357	1871	1653	2015	1511	1779	1526	1464	2040	1775	1691	1922	1888	1755	2063	2179	1857	1781	2245	1734	2246	2348	2406	2549	2442	2306	17.6	18.25	22.43	20	20.41	18.99
SK1G00039624	MergePeak_332	quadrant2	no	105	120	140	89	100	84	103	90	136	116	134	174	133	161	130	251	201	287	207	222	184	272	406	456	459	493	427	392	398	492	502	456	497	403	610	548	522	550	700	659	8.89	11.9	14.92	8.16	8.8	7.82
SK1G00039624	MergePeak_333	quadrant2	no	105	120	140	89	100	84	103	90	136	116	134	174	133	161	130	251	201	287	207	222	184	272	406	456	459	493	427	392	398	492	502	456	497	403	610	548	522	550	700	659	8.89	11.9	14.92	8.16	8.8	7.82
SK1G00039625	MergePeak_334	quadrant5	no	2158	2225	1650	2575	3188	4495	3584	3666	3137	2237	3857	2838	5154	5505	3882	4658	4680	4659	4673	5406	6060	5221	4887	8298	5591	7868	6937	5670	7546	8289	5198	4674	4505	5501	6628	7093	5692	7465	6152	11192	72.21	83.6	65.02	98.07	116.61	165.42
SK1G00039625	MergePeak_335	quadrant5	no	2158	2225	1650	2575	3188	4495	3584	3666	3137	2237	3857	2838	5154	5505	3882	4658	4680	4659	4673	5406	6060	5221	4887	8298	5591	7868	6937	5670	7546	8289	5198	4674	4505	5501	6628	7093	5692	7465	6152	11192	72.21	83.6	65.02	98.07	116.61	165.42
SK1G00039626	MergePeak_336	quadrant5	no	400	330	339	349	380	308	399	407	362	352	352	358	471	389	383	547	452	611	368	452	488	416	649	596	548	560	580	539	635	654	562	453	660	572	683	681	629	708	821	746	10.72	9.93	10.7	10.64	11.13	9.08
SK1G00039626	MergePeak_337	quadrant5	no	400	330	339	349	380	308	399	407	362	352	352	358	471	389	383	547	452	611	368	452	488	416	649	596	548	560	580	539	635	654	562	453	660	572	683	681	629	708	821	746	10.72	9.93	10.7	10.64	11.13	9.08
SK1G00039627	MergePeak_338	quadrant5	no	845	803	811	826	938	858	892	799	956	964	924	1077	1328	1152	1084	1315	1291	1684	1386	1307	1424	1329	2108	2159	1999	2297	2125	1909	2053	2272	2186	1859	2455	1820	2461	2514	2463	2734	2501	2577	14.83	15.83	16.77	16.5	18	16.56
SK1G00039627	MergePeak_339	quadrant5	no	845	803	811	826	938	858	892	799	956	964	924	1077	1328	1152	1084	1315	1291	1684	1386	1307	1424	1329	2108	2159	1999	2297	2125	1909	2053	2272	2186	1859	2455	1820	2461	2514	2463	2734	2501	2577	14.83	15.83	16.77	16.5	18	16.56
SK1G00039627	MergePeak_340	quadrant5	no	845	803	811	826	938	858	892	799	956	964	924	1077	1328	1152	1084	1315	1291	1684	1386	1307	1424	1329	2108	2159	1999	2297	2125	1909	2053	2272	2186	1859	2455	1820	2461	2514	2463	2734	2501	2577	14.83	15.83	16.77	16.5	18	16.56
SK1G00039631	MergePeak_341	quadrant5	no	68	36	62	53	45	48	59	44	55	32	51	69	79	65	81	88	58	77	70	75	62	72	97	95	198	112	97	77	77	78	65	77	114	68	107	113	86	78	131	109	4.81	2.86	5.16	4.26	3.48	3.73
SK1G00039633	MergePeak_342	quadrant4	no	943	912	928	845	978	971	987	863	985	986	879	1051	1096	987	907	1295	1214	1522	1157	1202	1294	1060	1508	1328	1441	1504	1407	1360	1441	1473	1432	1464	1342	1394	1388	1664	1626	1424	1605	1748	16.72	18.1	19.3	17	18.93	18.94
SK1G00039633	MergePeak_343	quadrant5	no	943	912	928	845	978	971	987	863	985	986	879	1051	1096	987	907	1295	1214	1522	1157	1202	1294	1060	1508	1328	1441	1504	1407	1360	1441	1473	1432	1464	1342	1394	1388	1664	1626	1424	1605	1748	16.72	18.1	19.3	17	18.93	18.94
SK1G00039636	MergePeak_344	quadrant5	no	89	84	92	123	186	200	239	169	128	96	103	94	112	93	142	120	129	91	83	76	136	89	109	79	106	149	144	68	62	75	64	91	68	71	68	51	51	64	81	125	6.27	6.64	7.63	9.86	14.32	15.5
SK1G00039636	MergePeak_345	quadrant5	no	89	84	92	123	186	200	239	169	128	96	103	94	112	93	142	120	129	91	83	76	136	89	109	79	106	149	144	68	62	75	64	91	68	71	68	51	51	64	81	125	6.27	6.64	7.63	9.86	14.32	15.5
SK1G00039637	MergePeak_346	quadrant5	no	1145	975	983	1129	1101	1179	1325	1132	1300	1344	1220	1419	1511	1176	1145	1701	1478	1806	1571	1440	1491	1411	1738	1571	1466	1773	1921	1573	1776	1936	1745	1525	1730	1431	1794	1916	1993	1927	1995	1826	33.88	32.39	34.26	38.02	35.61	38.37
SK1G00039637	MergePeak_347	quadrant5	no	1145	975	983	1129	1101	1179	1325	1132	1300	1344	1220	1419	1511	1176	1145	1701	1478	1806	1571	1440	1491	1411	1738	1571	1466	1773	1921	1573	1776	1936	1745	1525	1730	1431	1794	1916	1993	1927	1995	1826	33.88	32.39	34.26	38.02	35.61	38.37
SK1G00039647	MergePeak_348	quadrant5	no	30	28	25	37	23	23	24	28	24	15	22	29	21	24	24	36	32	30	21	30	31	33	49	30	44	58	39	41	49	41	43	45	48	48	64	42	40	69	52	47	0.61	0.64	0.6	0.86	0.51	0.52
SK1G00039648	MergePeak_349	quadrant5	no	21	10	12	21	22	8	25	10	12	12	15	8	15	14	12	15	17	9	14	16	8	6	8	12	28	9	9	10	12	10	13	2	18	10	17	16	17	14	10	7	2.53	1.35	1.7	2.88	2.9	1.06
SK1G00039648	MergePeak_350	quadrant5	no	21	10	12	21	22	8	25	10	12	12	15	8	15	14	12	15	17	9	14	16	8	6	8	12	28	9	9	10	12	10	13	2	18	10	17	16	17	14	10	7	2.53	1.35	1.7	2.88	2.9	1.06
SK1G00039650	MergePeak_351	quadrant5	no	5418	4051	3632	3443	3788	3341	3058	2919	3175	3497	2845	4163	3262	3199	2963	5075	5044	4729	3140	3306	3086	3332	3575	2718	2756	2046	1935	2454	3252	3009	3064	3078	3728	2674	3167	3718	3222	3793	3618	3384	376.57	316.16	297.31	272.38	287.8	255.39
SK1G00039650	MergePeak_352	quadrant5	no	5418	4051	3632	3443	3788	3341	3058	2919	3175	3497	2845	4163	3262	3199	2963	5075	5044	4729	3140	3306	3086	3332	3575	2718	2756	2046	1935	2454	3252	3009	3064	3078	3728	2674	3167	3718	3222	3793	3618	3384	376.57	316.16	297.31	272.38	287.8	255.39
SK1G00039653	MergePeak_353	quadrant5	no	3795	3164	2846	2571	2860	2486	2349	2206	2625	2944	2287	3253	2351	1948	2128	3000	3149	3502	2445	2501	2399	2297	2762	2017	2005	1512	1592	2034	2595	2595	2295	2289	2497	2180	2378	2462	2383	2424	2851	2615	178.37	166.99	157.55	137.55	146.94	128.51
SK1G00039653	MergePeak_354	quadrant5	no	3795	3164	2846	2571	2860	2486	2349	2206	2625	2944	2287	3253	2351	1948	2128	3000	3149	3502	2445	2501	2399	2297	2762	2017	2005	1512	1592	2034	2595	2595	2295	2289	2497	2180	2378	2462	2383	2424	2851	2615	178.37	166.99	157.55	137.55	146.94	128.51
SK1G00039654	MergePeak_355	quadrant5	no	115	112	98	86	115	80	105	74	118	112	103	129	121	88	95	99	100	97	107	94	120	106	161	168	139	133	122	123	120	142	175	138	167	123	166	158	137	168	165	183	3.2	3.5	3.21	2.72	3.49	2.45
SK1G00039654	MergePeak_356	quadrant5	no	115	112	98	86	115	80	105	74	118	112	103	129	121	88	95	99	100	97	107	94	120	106	161	168	139	133	122	123	120	142	175	138	167	123	166	158	137	168	165	183	3.2	3.5	3.21	2.72	3.49	2.45
SK1G00039658	MergePeak_357	quadrant5	no	118	105	94	69	122	90	102	128	135	113	116	170	176	125	114	191	145	159	118	145	92	152	217	198	192	184	142	155	168	192	177	163	230	179	169	245	223	208	254	209	4.38	4.37	4.11	2.91	4.95	3.67
SK1G00039659	MergePeak_358	quadrant5	no	964	936	907	975	1030	973	1166	964	1090	1048	1091	1275	1315	1053	1070	1514	1307	1598	1371	1253	1382	1233	1918	1739	1609	1744	1667	1571	1626	1871	1669	1474	1950	1621	1934	2043	2125	2003	2162	2059	20.77	22.64	23.02	23.91	24.26	23.06
SK1G00039659	MergePeak_359	quadrant5	no	964	936	907	975	1030	973	1166	964	1090	1048	1091	1275	1315	1053	1070	1514	1307	1598	1371	1253	1382	1233	1918	1739	1609	1744	1667	1571	1626	1871	1669	1474	1950	1621	1934	2043	2125	2003	2162	2059	20.77	22.64	23.02	23.91	24.26	23.06
SK1G00039659	MergePeak_360	quadrant5	no	964	936	907	975	1030	973	1166	964	1090	1048	1091	1275	1315	1053	1070	1514	1307	1598	1371	1253	1382	1233	1918	1739	1609	1744	1667	1571	1626	1871	1669	1474	1950	1621	1934	2043	2125	2003	2162	2059	20.77	22.64	23.02	23.91	24.26	23.06
SK1G00039659	MergePeak_361	quadrant5	no	964	936	907	975	1030	973	1166	964	1090	1048	1091	1275	1315	1053	1070	1514	1307	1598	1371	1253	1382	1233	1918	1739	1609	1744	1667	1571	1626	1871	1669	1474	1950	1621	1934	2043	2125	2003	2162	2059	20.77	22.64	23.02	23.91	24.26	23.06
SK1G00039659	MergePeak_362	quadrant5	no	964	936	907	975	1030	973	1166	964	1090	1048	1091	1275	1315	1053	1070	1514	1307	1598	1371	1253	1382	1233	1918	1739	1609	1744	1667	1571	1626	1871	1669	1474	1950	1621	1934	2043	2125	2003	2162	2059	20.77	22.64	23.02	23.91	24.26	23.06
SK1G00039661	MergePeak_363	quadrant5	no	544	427	366	475	414	438	381	289	327	344	319	340	347	322	292	389	407	404	405	315	340	339	465	433	348	339	320	348	464	423	393	398	429	316	392	447	497	511	488	474	19.7	17.36	15.61	19.58	16.39	17.44
SK1G00039662	MergePeak_364	quadrant5	no	1554	1099	1448	1316	1371	1239	1448	1292	1467	1386	1369	1792	2007	1606	1405	1979	1764	2464	1867	1848	1776	1988	3056	3324	3098	4187	3607	2814	2964	3454	3257	2696	3746	2681	3924	3688	3672	4431	4104	3902	38.62	30.67	42.39	37.23	37.25	33.87
SK1G00039662	MergePeak_365	quadrant5	no	1554	1099	1448	1316	1371	1239	1448	1292	1467	1386	1369	1792	2007	1606	1405	1979	1764	2464	1867	1848	1776	1988	3056	3324	3098	4187	3607	2814	2964	3454	3257	2696	3746	2681	3924	3688	3672	4431	4104	3902	38.62	30.67	42.39	37.23	37.25	33.87
SK1G00039663	MergePeak_366	quadrant5	no	4207	3539	4102	4499	4588	4632	5633	4558	5763	5686	5558	6716	6474	5507	5796	7933	6886	8951	7530	7556	8139	6967	9760	8468	8874	9893	9289	8594	9290	9492	9058	8006	10051	8282	9202	10057	10607	9477	10704	10705	68.32	64.54	78.46	83.17	81.45	82.73
SK1G00039663	MergePeak_367	quadrant5	no	4207	3539	4102	4499	4588	4632	5633	4558	5763	5686	5558	6716	6474	5507	5796	7933	6886	8951	7530	7556	8139	6967	9760	8468	8874	9893	9289	8594	9290	9492	9058	8006	10051	8282	9202	10057	10607	9477	10704	10705	68.32	64.54	78.46	83.17	81.45	82.73
SK1G00039663	MergePeak_368	quadrant5	no	4207	3539	4102	4499	4588	4632	5633	4558	5763	5686	5558	6716	6474	5507	5796	7933	6886	8951	7530	7556	8139	6967	9760	8468	8874	9893	9289	8594	9290	9492	9058	8006	10051	8282	9202	10057	10607	9477	10704	10705	68.32	64.54	78.46	83.17	81.45	82.73
SK1G00039663	MergePeak_369	quadrant5	no	4207	3539	4102	4499	4588	4632	5633	4558	5763	5686	5558	6716	6474	5507	5796	7933	6886	8951	7530	7556	8139	6967	9760	8468	8874	9893	9289	8594	9290	9492	9058	8006	10051	8282	9202	10057	10607	9477	10704	10705	68.32	64.54	78.46	83.17	81.45	82.73
SK1G00039663	MergePeak_370	quadrant5	no	4207	3539	4102	4499	4588	4632	5633	4558	5763	5686	5558	6716	6474	5507	5796	7933	6886	8951	7530	7556	8139	6967	9760	8468	8874	9893	9289	8594	9290	9492	9058	8006	10051	8282	9202	10057	10607	9477	10704	10705	68.32	64.54	78.46	83.17	81.45	82.73
SK1G00039664	MergePeak_371	quadrant5	no	1780	1093	1656	1123	1763	1018	1333	1436	1407	1472	685	2074	1739	1013	1245	2175	1619	1936	1264	1551	1232	1436	2151	1620	1757	1547	993	1459	1579	1505	2067	1434	1544	1643	1950	2559	1976	1914	2618	1403	380.08	262.06	416.46	272.94	411.51	239.06
SK1G00039667	MergePeak_372	quadrant5	no	1381	1161	1176	967	1276	781	1016	1041	1141	1203	873	1619	1261	840	912	1800	1345	2059	1098	1167	1425	1381	2058	1493	1461	993	1067	1181	1452	1260	1866	1521	1561	1565	1887	2247	1726	1696	2269	1574	66.52	62.79	66.71	53.02	67.19	41.37
SK1G00039667	MergePeak_373	quadrant5	no	1381	1161	1176	967	1276	781	1016	1041	1141	1203	873	1619	1261	840	912	1800	1345	2059	1098	1167	1425	1381	2058	1493	1461	993	1067	1181	1452	1260	1866	1521	1561	1565	1887	2247	1726	1696	2269	1574	66.52	62.79	66.71	53.02	67.19	41.37
SK1G00039669	MergePeak_374	quadrant5	no	50	38	47	33	44	24	40	29	41	34	44	48	60	37	39	38	34	41	37	46	31	35	41	44	26	57	34	58	27	50	52	39	54	33	62	51	32	39	51	56	2.03	1.73	2.25	1.52	1.95	1.07
SK1G00039670	MergePeak_375	quadrant5	no	0	6	0	0	1	0	0	0	0	0	2	0	0	4	0	0	0	1	4	0	1	1	0	5	0	0	0	0	1	1	0	1	3	1	0	3	0	0	0	3	0	0.84	0	0	0.14	0
SK1G00039670	MergePeak_376	quadrant5	no	0	6	0	0	1	0	0	0	0	0	2	0	0	4	0	0	0	1	4	0	1	1	0	5	0	0	0	0	1	1	0	1	3	1	0	3	0	0	0	3	0	0.84	0	0	0.14	0
SK1G00039672	MergePeak_377	quadrant5	no	140	122	148	112	114	67	85	83	105	102	94	113	122	81	60	127	120	134	81	91	127	117	153	169	169	235	142	158	235	169	159	152	230	134	206	204	173	218	240	183	2.49	2.43	3.1	2.27	2.21	1.31
SK1G00039672	MergePeak_378	quadrant5	no	140	122	148	112	114	67	85	83	105	102	94	113	122	81	60	127	120	134	81	91	127	117	153	169	169	235	142	158	235	169	159	152	230	134	206	204	173	218	240	183	2.49	2.43	3.1	2.27	2.21	1.31
SK1G00039673	MergePeak_379	quadrant5	no	473	403	497	433	522	519	649	514	649	568	659	737	777	660	634	797	774	965	883	823	809	905	1407	1267	1438	1425	1412	1136	1148	1276	1231	1139	1430	1064	1536	1541	1921	1766	2028	1723	19.22	18.39	23.79	20.03	23.19	23.2
SK1G00039673	MergePeak_380	quadrant5	no	473	403	497	433	522	519	649	514	649	568	659	737	777	660	634	797	774	965	883	823	809	905	1407	1267	1438	1425	1412	1136	1148	1276	1231	1139	1430	1064	1536	1541	1921	1766	2028	1723	19.22	18.39	23.79	20.03	23.19	23.2
SK1G00039673	MergePeak_381	quadrant5	no	473	403	497	433	522	519	649	514	649	568	659	737	777	660	634	797	774	965	883	823	809	905	1407	1267	1438	1425	1412	1136	1148	1276	1231	1139	1430	1064	1536	1541	1921	1766	2028	1723	19.22	18.39	23.79	20.03	23.19	23.2
SK1G00039674	MergePeak_382	quadrant5	no	73	73	68	112	75	118	151	91	76	69	60	91	63	24	69	88	85	55	103	54	68	50	93	58	46	37	67	35	49	41	42	68	56	33	53	20	123	26	43	114	4.61	5.18	5.06	8.05	5.18	8.19
SK1G00039674	MergePeak_383	quadrant5	no	73	73	68	112	75	118	151	91	76	69	60	91	63	24	69	88	85	55	103	54	68	50	93	58	46	37	67	35	49	41	42	68	56	33	53	20	123	26	43	114	4.61	5.18	5.06	8.05	5.18	8.19
SK1G00039674	MergePeak_384	quadrant5	no	73	73	68	112	75	118	151	91	76	69	60	91	63	24	69	88	85	55	103	54	68	50	93	58	46	37	67	35	49	41	42	68	56	33	53	20	123	26	43	114	4.61	5.18	5.06	8.05	5.18	8.19
SK1G00039676	MergePeak_385	quadrant5	no	800	732	894	789	919	819	883	654	739	693	637	753	874	682	660	988	817	918	713	842	687	765	863	667	630	705	644	777	785	915	770	735	935	727	772	966	908	867	1026	839	9.16	9.41	12.05	10.28	11.5	10.31
SK1G00039676	MergePeak_386	quadrant5	no	800	732	894	789	919	819	883	654	739	693	637	753	874	682	660	988	817	918	713	842	687	765	863	667	630	705	644	777	785	915	770	735	935	727	772	966	908	867	1026	839	9.16	9.41	12.05	10.28	11.5	10.31
SK1G00039676	MergePeak_387	quadrant5	no	800	732	894	789	919	819	883	654	739	693	637	753	874	682	660	988	817	918	713	842	687	765	863	667	630	705	644	777	785	915	770	735	935	727	772	966	908	867	1026	839	9.16	9.41	12.05	10.28	11.5	10.31
SK1G00039676	MergePeak_388	quadrant5	no	800	732	894	789	919	819	883	654	739	693	637	753	874	682	660	988	817	918	713	842	687	765	863	667	630	705	644	777	785	915	770	735	935	727	772	966	908	867	1026	839	9.16	9.41	12.05	10.28	11.5	10.31
SK1G00039676	MergePeak_389	quadrant5	no	800	732	894	789	919	819	883	654	739	693	637	753	874	682	660	988	817	918	713	842	687	765	863	667	630	705	644	777	785	915	770	735	935	727	772	966	908	867	1026	839	9.16	9.41	12.05	10.28	11.5	10.31
SK1G00039678	MergePeak_390	quadrant5	no	125	75	136	90	114	99	113	92	125	88	117	118	133	118	81	108	149	146	86	114	95	129	153	92	63	75	103	96	134	125	121	114	109	125	101	162	115	133	119	108	5.71	3.89	7.34	4.73	5.73	4.98
SK1G00039682	MergePeak_391	quadrant5	no	5188	4107	5414	5839	5999	5243	6965	5521	3169	2999	3728	4799	3329	2425	3835	5901	5352	4001	3747	3311	3462	2786	4196	2635	3145	4010	3850	2359	1883	2422	2348	2838	3320	1634	2155	2536	3783	2865	3624	3083	142.39	126.57	175	182.41	179.98	158.26
SK1G00039682	MergePeak_392	quadrant5	no	5188	4107	5414	5839	5999	5243	6965	5521	3169	2999	3728	4799	3329	2425	3835	5901	5352	4001	3747	3311	3462	2786	4196	2635	3145	4010	3850	2359	1883	2422	2348	2838	3320	1634	2155	2536	3783	2865	3624	3083	142.39	126.57	175	182.41	179.98	158.26
SK1G00039684	MergePeak_393	quadrant5	no	636	549	565	563	608	627	707	598	633	640	580	713	739	644	547	822	759	860	672	719	690	742	913	908	863	914	916	759	904	919	911	842	1007	845	972	1155	1045	1056	1134	1093	29.6	28.69	30.97	29.83	30.93	32.1
SK1G00039685	MergePeak_394	quadrant5	no	17	2	1	4	3	7	8	4	2	14	3	16	4	6	5	12	0	11	10	13	12	6	14	27	4	6	6	11	3	6	6	7	4	18	20	11	4	5	9	13	1.42	0.2	0.1	0.4	0.29	0.67
SK1G00039685	MergePeak_395	quadrant5	no	17	2	1	4	3	7	8	4	2	14	3	16	4	6	5	12	0	11	10	13	12	6	14	27	4	6	6	11	3	6	6	7	4	18	20	11	4	5	9	13	1.42	0.2	0.1	0.4	0.29	0.67
SK1G00039685	MergePeak_396	quadrant5	no	17	2	1	4	3	7	8	4	2	14	3	16	4	6	5	12	0	11	10	13	12	6	14	27	4	6	6	11	3	6	6	7	4	18	20	11	4	5	9	13	1.42	0.2	0.1	0.4	0.29	0.67
SK1G00039686	MergePeak_395	quadrant5	no	1739	1230	1575	1837	1786	1950	2338	1844	1977	1829	2130	3008	2090	1940	1861	3175	2773	2909	2986	2347	2644	2348	2729	2478	1867	2915	2594	2114	2523	2823	3388	3085	3539	2260	3735	2941	3551	3058	3397	3539	71.5	56.79	76.28	85.97	80.27	88.17
SK1G00039686	MergePeak_396	quadrant5	no	1739	1230	1575	1837	1786	1950	2338	1844	1977	1829	2130	3008	2090	1940	1861	3175	2773	2909	2986	2347	2644	2348	2729	2478	1867	2915	2594	2114	2523	2823	3388	3085	3539	2260	3735	2941	3551	3058	3397	3539	71.5	56.79	76.28	85.97	80.27	88.17
SK1G00039686	MergePeak_397	quadrant5	no	1739	1230	1575	1837	1786	1950	2338	1844	1977	1829	2130	3008	2090	1940	1861	3175	2773	2909	2986	2347	2644	2348	2729	2478	1867	2915	2594	2114	2523	2823	3388	3085	3539	2260	3735	2941	3551	3058	3397	3539	71.5	56.79	76.28	85.97	80.27	88.17
SK1G00039687	MergePeak_398	quadrant5	no	246	228	227	165	207	188	203	226	227	238	221	265	264	261	232	278	257	314	258	245	293	272	333	262	256	273	273	281	375	383	357	339	370	297	380	386	358	392	405	371	11.78	12.26	12.8	8.99	10.83	9.9
SK1G00039687	MergePeak_399	quadrant5	no	246	228	227	165	207	188	203	226	227	238	221	265	264	261	232	278	257	314	258	245	293	272	333	262	256	273	273	281	375	383	357	339	370	297	380	386	358	392	405	371	11.78	12.26	12.8	8.99	10.83	9.9
SK1G00039691	MergePeak_400	quadrant5	no	166	144	176	188	168	177	189	132	176	199	178	226	203	157	182	267	233	281	251	229	255	231	251	249	240	277	265	292	284	295	280	306	313	258	294	326	336	329	323	332	2.46	2.39	3.07	3.17	2.72	2.88
SK1G00039691	MergePeak_401	quadrant4	no	166	144	176	188	168	177	189	132	176	199	178	226	203	157	182	267	233	281	251	229	255	231	251	249	240	277	265	292	284	295	280	306	313	258	294	326	336	329	323	332	2.46	2.39	3.07	3.17	2.72	2.88
SK1G00039692	MergePeak_402	quadrant5	no	324	250	292	279	281	255	310	234	328	284	325	370	386	385	377	378	463	533	475	425	494	485	818	711	815	844	696	615	674	732	659	643	811	702	796	786	848	908	901	836	8.59	7.44	9.12	8.42	8.15	7.44
SK1G00039692	MergePeak_403	quadrant5	no	324	250	292	279	281	255	310	234	328	284	325	370	386	385	377	378	463	533	475	425	494	485	818	711	815	844	696	615	674	732	659	643	811	702	796	786	848	908	901	836	8.59	7.44	9.12	8.42	8.15	7.44
SK1G00039693	MergePeak_404	quadrant5	no	217	188	140	407	307	423	649	442	332	445	852	687	611	450	759	681	720	644	753	485	636	455	483	269	513	437	496	305	267	274	466	376	421	332	445	337	486	332	496	476	14.34	13.95	10.9	30.62	22.18	30.75
SK1G00039693	MergePeak_405	quadrant5	no	217	188	140	407	307	423	649	442	332	445	852	687	611	450	759	681	720	644	753	485	636	455	483	269	513	437	496	305	267	274	466	376	421	332	445	337	486	332	496	476	14.34	13.95	10.9	30.62	22.18	30.75
SK1G00039695	MergePeak_406	quadrant5	no	759	733	697	641	766	655	789	691	772	805	775	975	969	819	778	1210	989	1096	934	972	965	1011	1443	1291	1289	1314	1288	1163	1440	1375	1310	1202	1465	1182	1341	1610	1516	1464	1697	1577	18.54	20.1	20.05	17.82	20.45	17.59
SK1G00039695	MergePeak_407	quadrant5	no	759	733	697	641	766	655	789	691	772	805	775	975	969	819	778	1210	989	1096	934	972	965	1011	1443	1291	1289	1314	1288	1163	1440	1375	1310	1202	1465	1182	1341	1610	1516	1464	1697	1577	18.54	20.1	20.05	17.82	20.45	17.59
SK1G00039695	MergePeak_408	quadrant5	no	759	733	697	641	766	655	789	691	772	805	775	975	969	819	778	1210	989	1096	934	972	965	1011	1443	1291	1289	1314	1288	1163	1440	1375	1310	1202	1465	1182	1341	1610	1516	1464	1697	1577	18.54	20.1	20.05	17.82	20.45	17.59
SK1G00039696	MergePeak_409	quadrant5	no	3	3	5	0	2	5	12	1	12	6	4	6	9	9	9	7	10	12	11	8	8	13	16	6	7	11	13	7	12	5	7	6	15	9	9	4	13	7	14	10	0.57	0.64	1.12	0	0.42	1.04
SK1G00039699	MergePeak_410	quadrant5	no	378	299	352	325	378	322	431	316	408	349	353	444	467	375	336	461	418	611	456	484	511	467	657	711	673	713	628	588	687	700	740	544	824	582	785	787	744	833	889	895	7.07	6.28	7.75	6.92	7.72	6.62
SK1G00039699	MergePeak_411	quadrant5	no	378	299	352	325	378	322	431	316	408	349	353	444	467	375	336	461	418	611	456	484	511	467	657	711	673	713	628	588	687	700	740	544	824	582	785	787	744	833	889	895	7.07	6.28	7.75	6.92	7.72	6.62
SK1G00039699	MergePeak_412	quadrant5	no	378	299	352	325	378	322	431	316	408	349	353	444	467	375	336	461	418	611	456	484	511	467	657	711	673	713	628	588	687	700	740	544	824	582	785	787	744	833	889	895	7.07	6.28	7.75	6.92	7.72	6.62
SK1G00039702	MergePeak_413	quadrant2	no	4130	4121	3712	3364	3738	3614	4819	4657	4206	4101	6256	5406	7549	7923	7549	8001	6599	10916	10287	10439	10086	10150	16366	14044	17276	11520	11405	13770	15042	14954	19607	15082	12129	15780	11815	16469	11634	12970	15864	14046	168.5	188.79	178.37	156.22	166.71	162.15
SK1G00039702	MergePeak_414	quadrant2	no	4130	4121	3712	3364	3738	3614	4819	4657	4206	4101	6256	5406	7549	7923	7549	8001	6599	10916	10287	10439	10086	10150	16366	14044	17276	11520	11405	13770	15042	14954	19607	15082	12129	15780	11815	16469	11634	12970	15864	14046	168.5	188.79	178.37	156.22	166.71	162.15
SK1G00039703	MergePeak_415	quadrant5	no	650	633	442	620	797	1186	853	968	1298	1254	1030	1207	1696	1662	1393	1627	1602	1910	1752	1826	1881	2017	1545	2046	1561	1369	1486	1527	2001	1934	2124	1920	2048	2019	2193	2375	2135	2251	1988	2448	31.26	34.18	25.04	33.94	41.9	62.73
SK1G00039703	MergePeak_416	quadrant5	no	650	633	442	620	797	1186	853	968	1298	1254	1030	1207	1696	1662	1393	1627	1602	1910	1752	1826	1881	2017	1545	2046	1561	1369	1486	1527	2001	1934	2124	1920	2048	2019	2193	2375	2135	2251	1988	2448	31.26	34.18	25.04	33.94	41.9	62.73
SK1G00039704	MergePeak_417	quadrant5	no	0	3	2	3	4	7	5	2	3	1	1	2	8	1	0	5	3	12	6	5	8	8	6	3	12	2	2	8	3	6	4	9	3	11	7	8	8	2	6	2	0	0.44	0.31	0.44	0.57	1
SK1G00039707	MergePeak_418	quadrant8	no	2406	2334	1659	1976	1813	1373	1610	1301	557	455	1168	936	664	351	786	1330	1068	672	472	521	377	267	1510	233	323	270	420	300	252	341	150	294	411	148	184	214	356	139	673	259	72.05	78.48	58.51	67.35	59.35	45.22
SK1G00039709	MergePeak_419	quadrant5	no	237	224	205	174	218	233	286	194	269	255	245	333	313	175	253	336	317	351	266	256	286	303	380	383	356	296	306	333	326	345	429	288	356	350	347	433	392	359	502	365	6.75	7.16	6.87	5.64	6.78	7.29
SK1G00039710	MergePeak_420	quadrant5	no	45	55	41	36	30	37	39	45	67	26	35	40	59	39	37	51	34	64	43	40	56	44	85	75	78	84	92	58	92	96	66	57	71	51	69	79	68	85	98	89	0.98	1.35	1.05	0.89	0.72	0.89
SK1G00039711	MergePeak_421	quadrant5	no	38	21	31	34	41	25	44	48	29	40	38	40	45	39	28	38	33	52	47	34	30	28	44	56	49	39	40	46	47	60	65	42	46	39	80	66	51	55	56	45	0.58	0.36	0.56	0.59	0.69	0.42
SK1G00039712	MergePeak_422	quadrant5	no	14	5	12	9	5	12	9	2	10	5	6	13	2	7	4	17	13	8	9	6	10	10	10	10	7	4	7	4	23	3	6	12	10	6	6	10	9	7	15	11	2.18	0.87	2.2	1.6	0.85	2.06
SK1G00039712	MergePeak_423	quadrant5	no	14	5	12	9	5	12	9	2	10	5	6	13	2	7	4	17	13	8	9	6	10	10	10	10	7	4	7	4	23	3	6	12	10	6	6	10	9	7	15	11	2.18	0.87	2.2	1.6	0.85	2.06
SK1G00039713	MergePeak_424	quadrant5	no	834	797	584	696	713	758	689	548	538	590	570	599	625	523	498	693	649	709	589	542	534	542	643	486	477	482	431	469	605	583	556	508	648	426	613	620	525	621	686	700	28.21	30.27	23.27	26.8	26.36	28.2
SK1G00039713	MergePeak_425	quadrant5	no	834	797	584	696	713	758	689	548	538	590	570	599	625	523	498	693	649	709	589	542	534	542	643	486	477	482	431	469	605	583	556	508	648	426	613	620	525	621	686	700	28.21	30.27	23.27	26.8	26.36	28.2
SK1G00039718	MergePeak_426	quadrant8	no	399	394	343	470	435	364	423	384	204	152	244	285	233	176	235	404	328	206	240	203	205	155	265	175	126	207	208	164	170	175	152	147	198	121	163	200	199	148	186	135	20.11	22.3	20.36	26.96	23.96	20.17
SK1G00039719	MergePeak_427	quadrant5	no	191	187	145	173	153	210	173	164	191	199	203	206	243	208	185	247	263	281	184	208	239	171	226	202	207	175	162	177	183	226	160	221	203	177	161	220	227	178	274	251	4.8	5.28	4.29	4.95	4.2	5.81
SK1G00039721	MergePeak_428	quadrant5	no	302	221	220	225	222	221	235	168	241	234	200	240	177	186	126	284	216	246	168	187	177	189	173	137	93	198	138	183	178	209	156	194	208	151	219	179	186	189	237	256	4.39	3.61	3.77	3.72	3.53	3.53
SK1G00039722	MergePeak_429	quadrant5	no	448	517	537	371	519	520	403	455	471	405	322	505	527	716	705	621	704	732	425	771	533	526	815	533	414	407	365	530	577	625	617	601	601	583	519	782	550	509	665	611	12.33	15.98	17.41	11.63	15.62	15.74
SK1G00039722	MergePeak_430	quadrant5	no	448	517	537	371	519	520	403	455	471	405	322	505	527	716	705	621	704	732	425	771	533	526	815	533	414	407	365	530	577	625	617	601	601	583	519	782	550	509	665	611	12.33	15.98	17.41	11.63	15.62	15.74
SK1G00039724	MergePeak_431	quadrant5	no	118	76	97	84	73	52	66	60	87	66	56	85	70	63	71	118	106	65	77	61	60	63	84	39	22	45	25	32	60	59	58	65	73	62	66	49	48	54	82	50	3.08	2.23	2.99	2.5	2.09	1.49
SK1G00039727	MergePeak_432	quadrant5	no	286	238	205	310	314	342	379	353	322	340	404	387	383	336	359	523	533	551	555	476	502	527	513	572	440	530	603	461	593	448	450	557	568	390	495	570	668	582	681	682	10.5	9.81	8.87	12.96	12.61	13.81
SK1G00039727	MergePeak_433	quadrant5	no	286	238	205	310	314	342	379	353	322	340	404	387	383	336	359	523	533	551	555	476	502	527	513	572	440	530	603	461	593	448	450	557	568	390	495	570	668	582	681	682	10.5	9.81	8.87	12.96	12.61	13.81
SK1G00039729	MergePeak_434	quadrant5	no	219	160	217	148	168	143	197	155	151	183	171	160	178	122	120	213	182	231	127	191	139	153	175	117	136	120	118	151	182	184	225	189	226	185	172	215	208	164	213	205	7.76	6.37	9.06	5.97	6.51	5.57
SK1G00039729	MergePeak_435	quadrant5	no	219	160	217	148	168	143	197	155	151	183	171	160	178	122	120	213	182	231	127	191	139	153	175	117	136	120	118	151	182	184	225	189	226	185	172	215	208	164	213	205	7.76	6.37	9.06	5.97	6.51	5.57
SK1G00039730	MergePeak_436	quadrant5	no	314	343	246	440	343	562	514	362	473	365	338	408	504	430	403	434	458	487	594	418	520	415	370	360	278	356	461	313	346	323	376	404	389	287	369	342	515	333	378	463	6.7	8.22	6.18	10.69	8	13.19
SK1G00039731	MergePeak_437	quadrant2	no	1751	1495	1656	2099	2250	2118	3129	2983	4119	4636	6743	8063	6469	4920	6246	8021	7267	9065	8771	7788	8816	7545	8067	6859	7687	7752	8210	8024	8316	7410	10653	9482	8863	8489	9412	10412	11204	6982	10532	9460	56.29	53.96	62.69	76.8	79.06	74.88
SK1G00039731	MergePeak_438	quadrant2	no	1751	1495	1656	2099	2250	2118	3129	2983	4119	4636	6743	8063	6469	4920	6246	8021	7267	9065	8771	7788	8816	7545	8067	6859	7687	7752	8210	8024	8316	7410	10653	9482	8863	8489	9412	10412	11204	6982	10532	9460	56.29	53.96	62.69	76.8	79.06	74.88
SK1G00039735	MergePeak_439	quadrant5	no	149	133	147	156	148	142	149	149	204	145	123	143	169	186	170	229	221	201	160	214	177	139	218	197	196	210	220	161	218	221	207	159	175	170	163	203	172	227	220	193	3.87	3.88	4.5	4.61	4.2	4.06
SK1G00039735	MergePeak_440	quadrant5	no	149	133	147	156	148	142	149	149	204	145	123	143	169	186	170	229	221	201	160	214	177	139	218	197	196	210	220	161	218	221	207	159	175	170	163	203	172	227	220	193	3.87	3.88	4.5	4.61	4.2	4.06
SK1G00039735	MergePeak_441	quadrant5	no	149	133	147	156	148	142	149	149	204	145	123	143	169	186	170	229	221	201	160	214	177	139	218	197	196	210	220	161	218	221	207	159	175	170	163	203	172	227	220	193	3.87	3.88	4.5	4.61	4.2	4.06
SK1G00039735	MergePeak_442	quadrant5	no	149	133	147	156	148	142	149	149	204	145	123	143	169	186	170	229	221	201	160	214	177	139	218	197	196	210	220	161	218	221	207	159	175	170	163	203	172	227	220	193	3.87	3.88	4.5	4.61	4.2	4.06
SK1G00039740	MergePeak_443	quadrant5	no	274	350	186	251	273	346	206	170	176	172	181	122	228	225	165	225	212	219	200	169	180	185	205	198	173	176	147	185	212	227	181	154	164	144	136	191	170	222	222	236	9.33	13.39	7.46	9.73	10.17	12.96
SK1G00039747	MergePeak_444	quadrant5	no	395	424	373	427	413	402	471	372	351	298	342	423	457	318	346	511	421	427	403	419	405	421	566	501	383	457	469	367	440	462	449	351	451	376	366	466	479	560	532	538	14.43	17.39	16.05	17.75	16.49	16.15
SK1G00039747	MergePeak_445	quadrant5	no	395	424	373	427	413	402	471	372	351	298	342	423	457	318	346	511	421	427	403	419	405	421	566	501	383	457	469	367	440	462	449	351	451	376	366	466	479	560	532	538	14.43	17.39	16.05	17.75	16.49	16.15
SK1G00039747	MergePeak_446	quadrant5	no	395	424	373	427	413	402	471	372	351	298	342	423	457	318	346	511	421	427	403	419	405	421	566	501	383	457	469	367	440	462	449	351	451	376	366	466	479	560	532	538	14.43	17.39	16.05	17.75	16.49	16.15
SK1G00039748	MergePeak_447	quadrant5	no	130	161	94	142	130	153	133	73	90	68	104	99	160	102	123	116	118	109	114	86	129	148	185	186	117	133	114	116	160	138	137	106	136	147	183	162	147	203	211	177	4.07	5.65	3.46	5.05	4.44	5.26
SK1G00039748	MergePeak_448	quadrant5	no	130	161	94	142	130	153	133	73	90	68	104	99	160	102	123	116	118	109	114	86	129	148	185	186	117	133	114	116	160	138	137	106	136	147	183	162	147	203	211	177	4.07	5.65	3.46	5.05	4.44	5.26
SK1G00039749	MergePeak_449	quadrant5	no	1130	767	793	657	806	763	689	756	1036	1089	968	1118	1079	984	813	1287	1165	1611	1001	1315	1132	1062	1600	1247	1195	945	842	1096	1541	1386	1569	1536	1594	1507	1652	1796	1434	1120	1626	1716	50.77	38.69	41.96	33.6	39.59	37.7
SK1G00039749	MergePeak_450	quadrant5	no	1130	767	793	657	806	763	689	756	1036	1089	968	1118	1079	984	813	1287	1165	1611	1001	1315	1132	1062	1600	1247	1195	945	842	1096	1541	1386	1569	1536	1594	1507	1652	1796	1434	1120	1626	1716	50.77	38.69	41.96	33.6	39.59	37.7
SK1G00039753	MergePeak_451	quadrant5	no	1330	1163	1210	1225	1243	1272	1317	990	1066	1057	871	1078	1299	1134	1057	1333	1087	1380	1177	1213	1083	1111	1410	1513	1244	1497	1390	1175	1353	1483	1363	1225	1636	1068	1438	1615	1564	1713	1534	1613	21.33	20.94	22.85	22.36	21.79	22.43
SK1G00039753	MergePeak_452	quadrant5	no	1330	1163	1210	1225	1243	1272	1317	990	1066	1057	871	1078	1299	1134	1057	1333	1087	1380	1177	1213	1083	1111	1410	1513	1244	1497	1390	1175	1353	1483	1363	1225	1636	1068	1438	1615	1564	1713	1534	1613	21.33	20.94	22.85	22.36	21.79	22.43
SK1G00039753	MergePeak_453	quadrant5	no	1330	1163	1210	1225	1243	1272	1317	990	1066	1057	871	1078	1299	1134	1057	1333	1087	1380	1177	1213	1083	1111	1410	1513	1244	1497	1390	1175	1353	1483	1363	1225	1636	1068	1438	1615	1564	1713	1534	1613	21.33	20.94	22.85	22.36	21.79	22.43
SK1G00039754	MergePeak_454	quadrant5	no	2682	2318	2508	2607	2588	2484	2797	2343	2532	2485	2439	2769	2921	2603	2436	3374	3109	3618	3147	2967	3069	2946	3991	3854	3698	4110	3945	3587	3956	4132	3917	3462	4745	3283	4139	4902	4535	5068	5016	4575	42.64	41.38	46.97	47.18	44.98	43.44
SK1G00039754	MergePeak_455	quadrant5	no	2682	2318	2508	2607	2588	2484	2797	2343	2532	2485	2439	2769	2921	2603	2436	3374	3109	3618	3147	2967	3069	2946	3991	3854	3698	4110	3945	3587	3956	4132	3917	3462	4745	3283	4139	4902	4535	5068	5016	4575	42.64	41.38	46.97	47.18	44.98	43.44
SK1G00039754	MergePeak_456	quadrant5	no	2682	2318	2508	2607	2588	2484	2797	2343	2532	2485	2439	2769	2921	2603	2436	3374	3109	3618	3147	2967	3069	2946	3991	3854	3698	4110	3945	3587	3956	4132	3917	3462	4745	3283	4139	4902	4535	5068	5016	4575	42.64	41.38	46.97	47.18	44.98	43.44
SK1G00039757	MergePeak_457	quadrant5	no	656	723	593	681	638	651	696	704	671	651	599	714	700	724	602	748	613	645	609	659	540	632	662	639	562	598	662	665	695	656	578	613	716	600	687	763	683	744	740	689	18.01	22.92	19.44	21.36	18.79	19.26
SK1G00039757	MergePeak_458	quadrant5	no	656	723	593	681	638	651	696	704	671	651	599	714	700	724	602	748	613	645	609	659	540	632	662	639	562	598	662	665	695	656	578	613	716	600	687	763	683	744	740	689	18.01	22.92	19.44	21.36	18.79	19.26
SK1G00039757	MergePeak_459	quadrant5	no	656	723	593	681	638	651	696	704	671	651	599	714	700	724	602	748	613	645	609	659	540	632	662	639	562	598	662	665	695	656	578	613	716	600	687	763	683	744	740	689	18.01	22.92	19.44	21.36	18.79	19.26
SK1G00039758	MergePeak_460	quadrant5	no	185	158	220	149	156	158	132	156	170	137	115	189	186	144	136	255	160	226	203	237	142	212	279	282	241	302	262	295	302	320	324	233	321	263	347	325	310	381	370	301	6.78	6.5	9.5	6.22	6.25	6.37
SK1G00039759	MergePeak_461	quadrant5	no	687	550	534	483	628	629	638	514	533	425	511	630	643	656	561	762	757	706	571	639	533	678	770	599	594	460	467	620	771	669	657	641	673	642	632	826	643	764	857	733	19.59	17.61	17.93	15.68	19.58	19.73
SK1G00039759	MergePeak_462	quadrant5	no	687	550	534	483	628	629	638	514	533	425	511	630	643	656	561	762	757	706	571	639	533	678	770	599	594	460	467	620	771	669	657	641	673	642	632	826	643	764	857	733	19.59	17.61	17.93	15.68	19.58	19.73
SK1G00039759	MergePeak_463	quadrant5	no	687	550	534	483	628	629	638	514	533	425	511	630	643	656	561	762	757	706	571	639	533	678	770	599	594	460	467	620	771	669	657	641	673	642	632	826	643	764	857	733	19.59	17.61	17.93	15.68	19.58	19.73
SK1G00039760	MergePeak_464	quadrant5	no	90	73	78	99	89	71	76	65	106	94	96	112	108	121	108	139	98	161	125	119	127	127	193	179	163	165	140	162	204	240	152	174	177	163	192	219	181	271	241	214	2.47	2.25	2.52	3.09	2.67	2.13
SK1G00039760	MergePeak_465	quadrant5	no	90	73	78	99	89	71	76	65	106	94	96	112	108	121	108	139	98	161	125	119	127	127	193	179	163	165	140	162	204	240	152	174	177	163	192	219	181	271	241	214	2.47	2.25	2.52	3.09	2.67	2.13
SK1G00039761	MergePeak_466	quadrant5	no	150	92	114	100	150	82	128	122	96	83	129	119	112	97	108	143	121	122	122	114	108	129	117	125	119	109	116	103	142	120	112	127	147	132	136	160	128	177	167	177	6.35	4.37	5.68	4.82	6.94	3.83
SK1G00039761	MergePeak_467	quadrant5	no	150	92	114	100	150	82	128	122	96	83	129	119	112	97	108	143	121	122	122	114	108	129	117	125	119	109	116	103	142	120	112	127	147	132	136	160	128	177	167	177	6.35	4.37	5.68	4.82	6.94	3.83
SK1G00039762	MergePeak_468	quadrant5	no	259	203	229	192	175	168	216	196	205	214	193	258	274	259	237	365	341	336	240	293	276	273	438	480	406	571	554	371	460	469	573	442	449	365	522	517	520	521	515	546	11.15	9.82	11.61	9.41	8.24	7.96
SK1G00039762	MergePeak_469	quadrant5	no	259	203	229	192	175	168	216	196	205	214	193	258	274	259	237	365	341	336	240	293	276	273	438	480	406	571	554	371	460	469	573	442	449	365	522	517	520	521	515	546	11.15	9.82	11.61	9.41	8.24	7.96
SK1G00039762	MergePeak_470	quadrant5	no	259	203	229	192	175	168	216	196	205	214	193	258	274	259	237	365	341	336	240	293	276	273	438	480	406	571	554	371	460	469	573	442	449	365	522	517	520	521	515	546	11.15	9.82	11.61	9.41	8.24	7.96
SK1G00039763	MergePeak_471	quadrant5	no	8400	7232	6060	6446	6727	7158	6966	5925	6334	6580	5930	7517	6391	5574	5589	8052	7893	8514	6668	6312	6679	6373	7328	6018	5450	5151	4543	5347	7365	6934	6212	6053	6520	6036	6411	7520	6611	6963	7112	8366	216.4	209.2	183.86	189.01	189.44	202.8
SK1G00039763	MergePeak_472	quadrant5	no	8400	7232	6060	6446	6727	7158	6966	5925	6334	6580	5930	7517	6391	5574	5589	8052	7893	8514	6668	6312	6679	6373	7328	6018	5450	5151	4543	5347	7365	6934	6212	6053	6520	6036	6411	7520	6611	6963	7112	8366	216.4	209.2	183.86	189.01	189.44	202.8
SK1G00039763	MergePeak_473	quadrant5	no	8400	7232	6060	6446	6727	7158	6966	5925	6334	6580	5930	7517	6391	5574	5589	8052	7893	8514	6668	6312	6679	6373	7328	6018	5450	5151	4543	5347	7365	6934	6212	6053	6520	6036	6411	7520	6611	6963	7112	8366	216.4	209.2	183.86	189.01	189.44	202.8
SK1G00039768	MergePeak_474	quadrant5	no	3831	2853	3326	3359	3551	3927	4272	3517	3832	3681	4069	4750	4897	4864	3922	5420	4764	5696	4880	4780	4974	4959	7175	6625	5578	6535	5965	5575	6643	6956	5886	5761	6867	5445	6754	7578	6895	7880	8088	7519	133.58	111.71	136.59	133.32	135.35	150.59
SK1G00039768	MergePeak_475	quadrant5	no	3831	2853	3326	3359	3551	3927	4272	3517	3832	3681	4069	4750	4897	4864	3922	5420	4764	5696	4880	4780	4974	4959	7175	6625	5578	6535	5965	5575	6643	6956	5886	5761	6867	5445	6754	7578	6895	7880	8088	7519	133.58	111.71	136.59	133.32	135.35	150.59
SK1G00039768	MergePeak_476	quadrant5	no	3831	2853	3326	3359	3551	3927	4272	3517	3832	3681	4069	4750	4897	4864	3922	5420	4764	5696	4880	4780	4974	4959	7175	6625	5578	6535	5965	5575	6643	6956	5886	5761	6867	5445	6754	7578	6895	7880	8088	7519	133.58	111.71	136.59	133.32	135.35	150.59
SK1G00039771	MergePeak_477	quadrant5	no	2585	2174	2065	2121	2092	2229	2018	1861	2016	1938	1964	2426	2217	2059	1922	2647	2738	2981	2071	2276	2213	2243	3013	2409	2108	1981	1809	2112	2625	2709	2344	2348	2693	2326	2741	3117	2990	3112	3196	3254	123.27	116.41	115.98	115.13	109.05	116.9
SK1G00039771	MergePeak_478	quadrant5	no	2585	2174	2065	2121	2092	2229	2018	1861	2016	1938	1964	2426	2217	2059	1922	2647	2738	2981	2071	2276	2213	2243	3013	2409	2108	1981	1809	2112	2625	2709	2344	2348	2693	2326	2741	3117	2990	3112	3196	3254	123.27	116.41	115.98	115.13	109.05	116.9
SK1G00039772	MergePeak_480	quadrant5	no	648	695	403	533	659	837	561	532	573	488	660	642	715	750	553	787	873	831	663	614	829	690	892	918	707	475	451	612	828	867	646	626	705	622	778	842	854	816	966	1132	46.76	56.32	34.25	43.78	51.99	66.43
SK1G00039774	MergePeak_481	quadrant5	no	143	133	76	67	96	75	40	49	66	37	51	51	97	87	96	87	72	89	65	48	61	46	87	105	108	75	55	48	112	110	67	42	74	80	101	72	69	73	98	100	11.26	11.76	7.05	6.01	8.26	6.5
SK1G00039775	MergePeak_482	quadrant5	no	333	280	248	251	275	264	311	275	258	339	283	308	357	269	264	346	354	387	281	346	315	369	479	350	417	439	412	371	493	446	423	346	461	437	506	503	439	480	528	513	23.51	22.2	20.62	20.17	21.23	20.5
SK1G00039775	MergePeak_483	quadrant5	no	333	280	248	251	275	264	311	275	258	339	283	308	357	269	264	346	354	387	281	346	315	369	479	350	417	439	412	371	493	446	423	346	461	437	506	503	439	480	528	513	23.51	22.2	20.62	20.17	21.23	20.5
SK1G00039776	MergePeak_484	quadrant5	no	478	439	433	451	474	472	550	482	467	448	464	554	627	462	499	644	644	723	755	536	684	637	723	774	697	737	689	546	746	648	722	612	1002	569	729	871	740	849	779	893	30.56	31.51	32.6	32.82	33.12	33.18
SK1G00039777	MergePeak_485	quadrant5	no	259	178	228	174	166	141	154	146	173	123	168	137	184	142	138	187	180	246	177	215	149	179	259	204	237	246	229	189	234	298	198	206	225	200	302	282	212	263	282	270	6.31	4.87	6.54	4.82	4.42	3.78
SK1G00039779	MergePeak_486	quadrant8	no	411	336	336	369	284	277	282	206	231	196	189	231	179	150	153	299	164	227	148	166	153	158	190	131	165	107	118	120	135	154	204	168	190	131	138	174	197	140	189	157	16.44	15.1	15.83	16.8	12.42	12.19
SK1G00039779	MergePeak_487	quadrant8	no	411	336	336	369	284	277	282	206	231	196	189	231	179	150	153	299	164	227	148	166	153	158	190	131	165	107	118	120	135	154	204	168	190	131	138	174	197	140	189	157	16.44	15.1	15.83	16.8	12.42	12.19
SK1G00039780	MergePeak_488	quadrant5	no	2941	2614	3184	4575	2959	3246	4453	3304	3764	3239	3422	4715	2973	2983	3500	4999	3756	3955	4614	3263	4456	2288	1968	1000	1605	2670	3156	2202	1512	1862	2321	1598	1560	1310	1545	1582	2308	1690	1216	1287	83.9	83.34	108.87	151.75	94.59	104.92
SK1G00039780	MergePeak_489	quadrant5	no	2941	2614	3184	4575	2959	3246	4453	3304	3764	3239	3422	4715	2973	2983	3500	4999	3756	3955	4614	3263	4456	2288	1968	1000	1605	2670	3156	2202	1512	1862	2321	1598	1560	1310	1545	1582	2308	1690	1216	1287	83.9	83.34	108.87	151.75	94.59	104.92
SK1G00039781	MergePeak_490	quadrant5	no	923	759	879	901	846	790	814	795	1258	1034	1011	1257	1258	1229	1137	1375	1061	1528	1275	1248	1297	1284	1341	1605	1294	1680	1715	1397	1305	1406	1432	1220	1623	1157	1343	1689	1620	1579	1717	1312	14.19	13.1	15.91	15.76	14.21	13.35
SK1G00039781	MergePeak_491	quadrant5	no	923	759	879	901	846	790	814	795	1258	1034	1011	1257	1258	1229	1137	1375	1061	1528	1275	1248	1297	1284	1341	1605	1294	1680	1715	1397	1305	1406	1432	1220	1623	1157	1343	1689	1620	1579	1717	1312	14.19	13.1	15.91	15.76	14.21	13.35
SK1G00039781	MergePeak_492	quadrant5	no	923	759	879	901	846	790	814	795	1258	1034	1011	1257	1258	1229	1137	1375	1061	1528	1275	1248	1297	1284	1341	1605	1294	1680	1715	1397	1305	1406	1432	1220	1623	1157	1343	1689	1620	1579	1717	1312	14.19	13.1	15.91	15.76	14.21	13.35
SK1G00039782	MergePeak_493	quadrant5	no	34	23	41	27	24	22	33	12	39	51	38	43	42	31	29	60	38	75	29	35	36	29	64	39	50	33	30	40	55	66	33	36	56	22	46	52	70	36	92	52	2.52	1.91	3.57	2.27	1.94	1.79
SK1G00039785	MergePeak_494	quadrant5	no	72	59	58	82	74	51	83	52	80	62	51	90	61	78	63	153	79	77	63	75	59	84	83	52	55	60	47	59	70	96	73	105	63	67	50	102	106	80	81	98	3.07	2.81	2.94	3.97	3.47	2.38
SK1G00039786	MergePeak_495	quadrant5	no	25	46	22	24	24	30	9	25	14	20	16	11	28	36	27	28	32	30	17	22	20	8	15	22	15	10	14	8	21	16	17	14	12	16	24	18	6	18	10	25	1.24	2.56	1.28	1.35	1.3	1.63
SK1G00039790	MergePeak_496	quadrant5	no	98	127	137	89	132	147	116	118	110	81	110	156	163	164	148	171	141	176	93	177	138	145	149	194	68	102	84	171	135	200	105	111	113	146	135	182	148	149	219	188	2.34	3.4	3.85	2.42	3.44	3.86
SK1G00039794	MergePeak_497	quadrant5	no	10	5	4	9	6	4	5	1	8	4	0	5	9	4	4	5	9	4	11	11	5	2	7	11	10	12	19	10	13	5	12	7	11	18	10	11	8	15	14	6	0.13	0.07	0.06	0.14	0.09	0.06
SK1G00039795	MergePeak_498	quadrant5	no	437	620	300	505	453	709	488	422	491	279	353	372	522	531	503	607	585	515	393	460	476	437	643	607	539	444	391	401	634	596	392	413	450	402	437	490	451	460	483	738	7.23	11.52	5.85	9.51	8.19	12.9
SK1G00039795	MergePeak_499	quadrant5	no	437	620	300	505	453	709	488	422	491	279	353	372	522	531	503	607	585	515	393	460	476	437	643	607	539	444	391	401	634	596	392	413	450	402	437	490	451	460	483	738	7.23	11.52	5.85	9.51	8.19	12.9
SK1G00039795	MergePeak_500	quadrant5	no	437	620	300	505	453	709	488	422	491	279	353	372	522	531	503	607	585	515	393	460	476	437	643	607	539	444	391	401	634	596	392	413	450	402	437	490	451	460	483	738	7.23	11.52	5.85	9.51	8.19	12.9
SK1G00039795	MergePeak_501	quadrant5	no	437	620	300	505	453	709	488	422	491	279	353	372	522	531	503	607	585	515	393	460	476	437	643	607	539	444	391	401	634	596	392	413	450	402	437	490	451	460	483	738	7.23	11.52	5.85	9.51	8.19	12.9
SK1G00039795	MergePeak_502	quadrant5	no	437	620	300	505	453	709	488	422	491	279	353	372	522	531	503	607	585	515	393	460	476	437	643	607	539	444	391	401	634	596	392	413	450	402	437	490	451	460	483	738	7.23	11.52	5.85	9.51	8.19	12.9
SK1G00039797	MergePeak_503	quadrant5	no	901	806	837	863	939	915	961	832	907	806	910	960	958	896	899	1303	1047	1194	944	1071	921	1055	1245	960	808	1065	1024	914	1179	1214	1059	1007	1340	1107	1182	1426	1162	1149	1308	1369	23.25	23.36	25.45	25.36	26.5	25.99
SK1G00039797	MergePeak_504	quadrant5	no	901	806	837	863	939	915	961	832	907	806	910	960	958	896	899	1303	1047	1194	944	1071	921	1055	1245	960	808	1065	1024	914	1179	1214	1059	1007	1340	1107	1182	1426	1162	1149	1308	1369	23.25	23.36	25.45	25.36	26.5	25.99
SK1G00039797	MergePeak_505	quadrant5	no	901	806	837	863	939	915	961	832	907	806	910	960	958	896	899	1303	1047	1194	944	1071	921	1055	1245	960	808	1065	1024	914	1179	1214	1059	1007	1340	1107	1182	1426	1162	1149	1308	1369	23.25	23.36	25.45	25.36	26.5	25.99
SK1G00039799	MergePeak_506	quadrant5	no	902	635	740	679	697	673	769	753	798	809	851	913	1094	1009	810	1298	1149	1429	1131	1229	1086	1169	1586	1693	1614	1957	1806	1484	1662	1786	1806	1467	2045	1449	1859	2196	1943	2166	2078	2026	24.52	19.38	23.69	21.01	20.71	20.12
SK1G00039800	MergePeak_507	quadrant5	no	1	1	1	4	2	7	4	8	5	7	0	16	8	3	6	12	12	10	11	3	5	2	1	11	9	7	9	7	5	5	5	5	11	10	8	2	7	2	8	1	0.19	0.21	0.22	0.86	0.41	1.45
SK1G00039802	MergePeak_508	quadrant5	no	32	15	27	55	24	46	40	22	28	26	40	24	38	28	50	41	68	41	50	24	63	32	36	45	24	50	44	36	36	23	46	29	44	23	25	35	35	26	22	35	4.48	2.36	4.45	8.76	3.67	7.08
SK1G00039803	MergePeak_509	quadrant5	no	433	375	463	385	428	450	407	366	476	440	437	561	609	561	461	685	574	704	570	630	571	640	879	728	764	889	728	716	872	898	841	725	815	807	874	947	893	963	1159	969	13.53	13.16	17.04	13.7	14.62	15.47
SK1G00039803	MergePeak_510	quadrant5	no	433	375	463	385	428	450	407	366	476	440	437	561	609	561	461	685	574	704	570	630	571	640	879	728	764	889	728	716	872	898	841	725	815	807	874	947	893	963	1159	969	13.53	13.16	17.04	13.7	14.62	15.47
SK1G00039804	MergePeak_510	quadrant5	no	473	363	398	467	360	403	456	345	472	498	425	521	570	374	491	525	505	565	500	525	538	596	548	569	530	557	520	515	594	585	548	479	620	473	596	606	635	701	687	650	15.42	13.29	15.28	17.33	12.83	14.45
SK1G00039804	MergePeak_511	quadrant5	no	473	363	398	467	360	403	456	345	472	498	425	521	570	374	491	525	505	565	500	525	538	596	548	569	530	557	520	515	594	585	548	479	620	473	596	606	635	701	687	650	15.42	13.29	15.28	17.33	12.83	14.45
SK1G00039805	MergePeak_512	quadrant5	no	1007	972	1123	847	1051	978	959	946	1091	888	873	1153	1238	1166	1136	1529	1699	1687	1202	1409	1304	1317	2045	1560	1606	1701	1641	1491	2053	2095	1790	1690	1896	1643	1919	2129	1828	2226	2326	2299	12.31	13.34	16.16	11.78	14.04	13.14
SK1G00039806	MergePeak_513	quadrant5	no	124	105	131	122	105	133	125	97	122	115	101	144	130	118	95	138	121	161	98	98	126	103	186	125	119	146	117	100	118	140	142	137	145	125	132	179	181	175	178	184	4.26	4.05	5.3	4.77	3.94	5.02
SK1G00039806	MergePeak_514	quadrant5	no	124	105	131	122	105	133	125	97	122	115	101	144	130	118	95	138	121	161	98	98	126	103	186	125	119	146	117	100	118	140	142	137	145	125	132	179	181	175	178	184	4.26	4.05	5.3	4.77	3.94	5.02
SK1G00039808	MergePeak_515	quadrant5	no	258	211	200	225	235	250	273	211	203	216	213	248	292	264	256	235	280	282	258	221	255	276	337	261	254	242	317	287	326	345	228	274	276	280	296	374	304	352	342	356	19.57	17.98	17.87	19.43	19.49	20.86
SK1G00039808	MergePeak_516	quadrant5	no	258	211	200	225	235	250	273	211	203	216	213	248	292	264	256	235	280	282	258	221	255	276	337	261	254	242	317	287	326	345	228	274	276	280	296	374	304	352	342	356	19.57	17.98	17.87	19.43	19.49	20.86
SK1G00039809	MergePeak_517	quadrant2	no	0	0	0	0	0	0	0	0	0	0	0	0	0	0	0	0	0	0	0	0	0	0	0	0	0	0	0	1	0	0	0	0	0	0	0	0	0	0	1	0	0	0	0	0	0	0
SK1G00039809	MergePeak_518	quadrant2	no	0	0	0	0	0	0	0	0	0	0	0	0	0	0	0	0	0	0	0	0	0	0	0	0	0	0	0	1	0	0	0	0	0	0	0	0	0	0	1	0	0	0	0	0	0	0
SK1G00039810	MergePeak_519	quadrant5	no	78	113	66	94	122	92	76	88	87	92	117	98	126	108	104	141	186	126	90	100	125	142	195	177	126	108	91	104	111	159	99	101	154	115	128	138	130	120	122	184	2.9	4.73	2.91	3.99	4.96	3.76
SK1G00039810	MergePeak_520	quadrant5	no	78	113	66	94	122	92	76	88	87	92	117	98	126	108	104	141	186	126	90	100	125	142	195	177	126	108	91	104	111	159	99	101	154	115	128	138	130	120	122	184	2.9	4.73	2.91	3.99	4.96	3.76
SK1G00039810	MergePeak_521	quadrant5	no	78	113	66	94	122	92	76	88	87	92	117	98	126	108	104	141	186	126	90	100	125	142	195	177	126	108	91	104	111	159	99	101	154	115	128	138	130	120	122	184	2.9	4.73	2.91	3.99	4.96	3.76
SK1G00039811	MergePeak_520	quadrant5	no	315	346	217	322	294	345	289	254	312	248	271	292	277	305	265	340	344	379	299	281	327	297	376	340	251	283	230	248	346	376	272	277	298	224	291	334	274	440	397	399	11.24	13.86	9.1	13.07	11.46	13.54
SK1G00039811	MergePeak_521	quadrant5	no	315	346	217	322	294	345	289	254	312	248	271	292	277	305	265	340	344	379	299	281	327	297	376	340	251	283	230	248	346	376	272	277	298	224	291	334	274	440	397	399	11.24	13.86	9.1	13.07	11.46	13.54
SK1G00039811	MergePeak_522	quadrant5	no	315	346	217	322	294	345	289	254	312	248	271	292	277	305	265	340	344	379	299	281	327	297	376	340	251	283	230	248	346	376	272	277	298	224	291	334	274	440	397	399	11.24	13.86	9.1	13.07	11.46	13.54
SK1G00039813	MergePeak_523	quadrant5	no	3051	2918	2665	2652	2338	2152	2205	1968	2617	2535	2539	2896	3414	3043	3057	3647	3214	4767	4177	3584	3737	3855	4705	4124	3654	3239	3276	4149	4573	5026	5585	5300	4153	5181	3638	4977	3330	3695	4736	4437	83.96	90.17	86.37	83.07	70.33	65.13
SK1G00039813	MergePeak_524	quadrant5	no	3051	2918	2665	2652	2338	2152	2205	1968	2617	2535	2539	2896	3414	3043	3057	3647	3214	4767	4177	3584	3737	3855	4705	4124	3654	3239	3276	4149	4573	5026	5585	5300	4153	5181	3638	4977	3330	3695	4736	4437	83.96	90.17	86.37	83.07	70.33	65.13
SK1G00039813	MergePeak_525	quadrant5	no	3051	2918	2665	2652	2338	2152	2205	1968	2617	2535	2539	2896	3414	3043	3057	3647	3214	4767	4177	3584	3737	3855	4705	4124	3654	3239	3276	4149	4573	5026	5585	5300	4153	5181	3638	4977	3330	3695	4736	4437	83.96	90.17	86.37	83.07	70.33	65.13
SK1G00039815	MergePeak_526	quadrant5	no	569	484	414	389	555	480	421	431	518	431	476	611	578	505	514	840	778	871	611	653	669	642	877	878	781	774	681	779	834	1001	757	761	855	671	867	1010	821	1005	1096	1104	12.47	11.91	10.68	9.7	13.29	11.57
SK1G00039815	MergePeak_527	quadrant5	no	569	484	414	389	555	480	421	431	518	431	476	611	578	505	514	840	778	871	611	653	669	642	877	878	781	774	681	779	834	1001	757	761	855	671	867	1010	821	1005	1096	1104	12.47	11.91	10.68	9.7	13.29	11.57
SK1G00039815	MergePeak_528	quadrant5	no	569	484	414	389	555	480	421	431	518	431	476	611	578	505	514	840	778	871	611	653	669	642	877	878	781	774	681	779	834	1001	757	761	855	671	867	1010	821	1005	1096	1104	12.47	11.91	10.68	9.7	13.29	11.57
SK1G00039815	MergePeak_529	quadrant5	no	569	484	414	389	555	480	421	431	518	431	476	611	578	505	514	840	778	871	611	653	669	642	877	878	781	774	681	779	834	1001	757	761	855	671	867	1010	821	1005	1096	1104	12.47	11.91	10.68	9.7	13.29	11.57
SK1G00039816	MergePeak_530	quadrant5	no	1139	884	910	832	940	783	887	839	788	830	890	931	921	760	748	1179	1083	1273	1076	1001	908	991	1386	1125	1113	1300	1121	1080	1238	1418	1220	1111	1422	1007	1311	1374	1167	1594	1611	1548	41.8	36.43	39.34	34.76	37.71	31.61
SK1G00039819	MergePeak_531	quadrant5	no	388	297	345	350	377	358	417	376	361	346	372	452	557	380	354	557	451	550	437	511	462	427	520	472	441	516	471	407	518	526	465	463	600	462	548	590	610	648	685	636	22.64	19.46	23.71	23.24	24.04	22.97
SK1G00039820	MergePeak_532	quadrant7	no	40	21	31	36	34	33	36	34	14	11	9	6	7	0	2	32	16	3	11	0	12	1	8	4	6	7	2	6	2	2	20	1	11	2	2	3	7	1	7	9	3.73	2.2	3.41	3.82	3.47	3.39
SK1G00039822	MergePeak_533	quadrant5	no	234	224	192	244	184	192	332	206	175	155	214	178	214	153	129	181	202	155	155	162	153	165	171	136	142	179	189	146	179	149	156	133	155	141	148	172	189	159	183	199	3.93	4.22	3.8	4.66	3.38	3.54
SK1G00039823	MergePeak_534	quadrant5	no	85	61	70	65	72	54	74	64	68	72	56	53	81	61	63	97	68	110	41	76	64	76	90	83	75	69	73	90	70	81	61	68	70	54	61	104	85	86	94	93	4.51	3.64	4.38	3.93	4.18	3.15
SK1G00039824	MergePeak_535	quadrant5	no	530	1082	276	854	715	1302	874	785	775	347	890	711	1463	1119	1293	1019	1209	1284	1022	1050	1467	824	2085	1874	2306	1692	1584	1278	1770	1485	1089	1324	1019	1618	1195	1420	1456	1733	1652	2281	12.68	29.06	7.77	23.25	18.69	34.25
SK1G00039824	MergePeak_536	quadrant5	no	530	1082	276	854	715	1302	874	785	775	347	890	711	1463	1119	1293	1019	1209	1284	1022	1050	1467	824	2085	1874	2306	1692	1584	1278	1770	1485	1089	1324	1019	1618	1195	1420	1456	1733	1652	2281	12.68	29.06	7.77	23.25	18.69	34.25
SK1G00039825	MergePeak_537	quadrant5	no	402	373	390	443	457	530	668	530	542	617	581	870	582	400	505	697	689	675	790	536	846	530	558	533	629	542	712	465	463	550	522	614	597	375	444	484	1026	584	706	773	16.26	16.94	18.58	20.4	20.21	23.58
SK1G00039827	MergePeak_538	quadrant5	no	216	227	193	192	208	187	178	165	197	187	143	227	149	165	185	263	227	291	203	204	188	210	234	165	171	145	139	143	188	196	163	174	176	197	206	199	183	177	241	173	20.65	24.37	21.73	20.89	21.74	19.66
SK1G00039829	MergePeak_539	quadrant5	no	11	8	14	4	11	7	9	2	4	6	6	7	17	2	8	14	11	18	5	19	5	11	12	9	7	16	7	8	10	12	16	10	19	7	19	27	8	16	9	9	1	0.82	1.5	0.41	1.09	0.7
SK1G00039830	MergePeak_540	quadrant5	no	446	465	382	431	443	492	509	385	407	390	369	460	456	417	385	489	442	421	500	418	412	378	489	363	339	324	347	322	491	474	384	402	355	356	408	434	420	474	475	494	8.46	9.9	8.53	9.3	9.19	10.26
SK1G00039830	MergePeak_541	quadrant5	no	446	465	382	431	443	492	509	385	407	390	369	460	456	417	385	489	442	421	500	418	412	378	489	363	339	324	347	322	491	474	384	402	355	356	408	434	420	474	475	494	8.46	9.9	8.53	9.3	9.19	10.26
SK1G00039831	MergePeak_542	quadrant5	no	141	132	200	244	260	241	357	301	323	348	349	435	440	422	473	467	386	367	386	440	443	364	396	324	274	366	392	348	292	339	336	354	320	316	277	425	425	280	358	335	3.2	3.37	5.35	6.31	6.46	6.02
SK1G00039832	MergePeak_543	quadrant5	no	4752	3481	4945	5117	6463	5719	8501	6718	4292	4109	4208	5740	5597	3045	4513	6198	5560	4508	3102	3455	3066	2754	3536	2552	2818	4866	4860	2003	2077	2429	2825	2865	3071	2036	2796	2742	3653	3101	4385	3242	127	104.46	155.65	155.66	188.81	168.09
SK1G00039832	MergePeak_544	quadrant5	no	4752	3481	4945	5117	6463	5719	8501	6718	4292	4109	4208	5740	5597	3045	4513	6198	5560	4508	3102	3455	3066	2754	3536	2552	2818	4866	4860	2003	2077	2429	2825	2865	3071	2036	2796	2742	3653	3101	4385	3242	127	104.46	155.65	155.66	188.81	168.09
SK1G00039832	MergePeak_545	quadrant5	no	4752	3481	4945	5117	6463	5719	8501	6718	4292	4109	4208	5740	5597	3045	4513	6198	5560	4508	3102	3455	3066	2754	3536	2552	2818	4866	4860	2003	2077	2429	2825	2865	3071	2036	2796	2742	3653	3101	4385	3242	127	104.46	155.65	155.66	188.81	168.09
SK1G00039832	MergePeak_546	quadrant5	no	4752	3481	4945	5117	6463	5719	8501	6718	4292	4109	4208	5740	5597	3045	4513	6198	5560	4508	3102	3455	3066	2754	3536	2552	2818	4866	4860	2003	2077	2429	2825	2865	3071	2036	2796	2742	3653	3101	4385	3242	127	104.46	155.65	155.66	188.81	168.09
SK1G00039833	MergePeak_547	quadrant5	no	256	611	295	561	484	545	451	494	510	415	625	650	995	538	753	665	693	815	776	702	1039	788	1553	1241	806	1092	932	970	969	875	1014	793	1000	795	943	1371	1500	1567	1312	1053	5.11	13.69	6.94	12.74	10.56	11.97
SK1G00039833	MergePeak_548	quadrant4	no	256	611	295	561	484	545	451	494	510	415	625	650	995	538	753	665	693	815	776	702	1039	788	1553	1241	806	1092	932	970	969	875	1014	793	1000	795	943	1371	1500	1567	1312	1053	5.11	13.69	6.94	12.74	10.56	11.97
SK1G00039834	MergePeak_549	quadrant2	no	5	14	27	7	5	8	8	13	16	21	42	38	35	22	28	40	44	38	41	48	50	28	33	31	45	25	10	22	36	46	72	54	34	61	41	56	33	27	48	50	0.38	1.21	2.45	0.61	0.42	0.68
SK1G00039834	MergePeak_550	quadrant2	no	5	14	27	7	5	8	8	13	16	21	42	38	35	22	28	40	44	38	41	48	50	28	33	31	45	25	10	22	36	46	72	54	34	61	41	56	33	27	48	50	0.38	1.21	2.45	0.61	0.42	0.68
SK1G00039836	MergePeak_551	quadrant5	no	717	602	664	632	669	675	671	595	684	594	641	842	784	600	664	878	925	981	729	717	832	728	1036	1005	940	1025	903	889	1061	1023	981	922	1048	847	979	1246	1138	1267	1373	1206	19.8	18.67	21.6	19.87	20.2	20.5
SK1G00039837	MergePeak_552	quadrant5	no	200	161	214	140	183	155	153	205	238	219	176	245	173	119	174	248	242	269	176	285	180	161	188	119	157	199	160	162	181	207	215	201	196	226	254	201	199	189	240	239	4.91	4.44	6.19	3.91	4.91	4.18
SK1G00039839	MergePeak_553	quadrant5	no	615	554	428	511	572	611	528	542	469	441	414	572	495	482	545	743	722	770	474	568	585	518	575	509	440	306	330	397	619	482	606	462	515	510	525	600	500	505	578	746	60.08	60.78	49.25	56.83	61.09	65.65
SK1G00039840	MergePeak_554	quadrant5	no	541	390	411	407	483	386	448	388	357	371	360	403	432	315	334	455	418	451	393	354	365	368	506	558	386	655	531	519	486	540	559	492	664	386	511	581	618	624	651	611	16.02	12.96	14.33	13.71	15.63	12.57
SK1G00039840	MergePeak_555	quadrant5	no	541	390	411	407	483	386	448	388	357	371	360	403	432	315	334	455	418	451	393	354	365	368	506	558	386	655	531	519	486	540	559	492	664	386	511	581	618	624	651	611	16.02	12.96	14.33	13.71	15.63	12.57
SK1G00039841	MergePeak_556	quadrant5	no	1	2	1	1	0	1	3	0	0	1	0	3	2	0	0	1	2	0	1	3	2	2	0	0	0	0	0	0	2	1	6	0	2	2	2	1	0	4	1	2	0.2	0.45	0.23	0.23	0	0.22
SK1G00039844	MergePeak_557	quadrant5	no	422	431	296	315	371	411	299	251	324	304	317	306	399	493	307	504	395	510	386	389	373	331	668	614	592	458	515	401	673	729	448	452	504	545	562	607	613	576	809	832	16.3	18.69	13.46	13.85	15.66	17.46
SK1G00039844	MergePeak_558	quadrant5	no	422	431	296	315	371	411	299	251	324	304	317	306	399	493	307	504	395	510	386	389	373	331	668	614	592	458	515	401	673	729	448	452	504	545	562	607	613	576	809	832	16.3	18.69	13.46	13.85	15.66	17.46
SK1G00039847	MergePeak_559	quadrant5	no	3930	3076	3687	4491	5337	5637	6902	6035	6238	6422	6514	8424	8366	7403	7466	8736	8492	9657	7685	8171	7802	7122	6607	5495	5252	6096	6269	5761	6326	6619	7498	7121	6423	6747	5906	7915	7286	5900	7079	7170	101.71	89.39	112.38	132.29	150.98	160.44
SK1G00039847	MergePeak_560	quadrant5	no	3930	3076	3687	4491	5337	5637	6902	6035	6238	6422	6514	8424	8366	7403	7466	8736	8492	9657	7685	8171	7802	7122	6607	5495	5252	6096	6269	5761	6326	6619	7498	7121	6423	6747	5906	7915	7286	5900	7079	7170	101.71	89.39	112.38	132.29	150.98	160.44
SK1G00039848	MergePeak_561	quadrant5	no	282	278	257	201	264	235	269	250	298	320	327	389	381	279	332	493	439	549	425	452	456	409	518	472	506	465	441	475	577	576	472	455	581	460	506	601	567	541	652	672	7.09	7.85	7.61	5.75	7.26	6.5
SK1G00039849	MergePeak_562	quadrant5	no	761	1102	589	724	814	1089	819	629	728	567	1013	986	942	897	880	1126	974	1326	875	843	1034	953	2594	1710	3151	1234	1350	1230	1909	1917	1403	1445	1162	2017	1599	1894	1311	1687	1990	2080	36.04	58.6	32.85	39.03	42.14	56.72
SK1G00039849	MergePeak_563	quadrant5	no	761	1102	589	724	814	1089	819	629	728	567	1013	986	942	897	880	1126	974	1326	875	843	1034	953	2594	1710	3151	1234	1350	1230	1909	1917	1403	1445	1162	2017	1599	1894	1311	1687	1990	2080	36.04	58.6	32.85	39.03	42.14	56.72
SK1G00039853	MergePeak_564	quadrant3	yes	1	0	0	7	20	21	27	76	13	8	60	71	85	103	112	113	59	100	150	68	185	84	73	76	104	48	68	80	48	72	131	75	27	74	30	74	51	22	24	68	0.05	0	0	0.37	1.01	1.07
SK1G00039856	MergePeak_565	quadrant5	no	108	85	89	96	106	111	127	95	113	109	95	125	112	97	104	140	83	128	130	91	127	109	152	119	110	128	136	114	106	130	98	112	145	87	99	122	166	185	178	138	4.79	4.23	4.65	4.85	5.14	5.41
SK1G00039856	MergePeak_566	quadrant5	no	108	85	89	96	106	111	127	95	113	109	95	125	112	97	104	140	83	128	130	91	127	109	152	119	110	128	136	114	106	130	98	112	145	87	99	122	166	185	178	138	4.79	4.23	4.65	4.85	5.14	5.41
SK1G00039858	MergePeak_567	quadrant5	no	2197	3272	1407	2879	2099	2626	2748	2025	1406	1102	1277	1552	1855	943	2392	1374	1993	1310	1620	1147	1799	1018	2436	1497	1030	1174	1385	835	963	837	596	1363	1055	633	735	680	1922	877	1095	2334	52.77	88.25	39.8	78.71	55.11	69.37
SK1G00039864	MergePeak_568	quadrant5	no	235	204	226	194	217	199	179	192	241	250	249	246	300	256	247	332	288	383	317	362	345	339	504	527	413	508	472	408	501	496	441	433	531	430	513	612	529	670	570	537	7.54	7.34	8.53	7.09	7.61	7.02
SK1G00039864	MergePeak_569	quadrant5	no	235	204	226	194	217	199	179	192	241	250	249	246	300	256	247	332	288	383	317	362	345	339	504	527	413	508	472	408	501	496	441	433	531	430	513	612	529	670	570	537	7.54	7.34	8.53	7.09	7.61	7.02
SK1G00039868	MergePeak_570	quadrant5	no	128	119	84	152	125	202	172	124	158	96	92	100	233	231	155	201	141	225	135	157	201	147	213	189	126	156	131	130	163	156	158	104	161	164	176	162	117	194	128	182	8.21	8.57	6.34	11.09	8.76	14.25
SK1G00039869	MergePeak_571	quadrant5	no	111	70	107	96	84	86	100	89	52	66	51	110	87	122	92	90	60	84	56	83	75	91	125	54	64	96	64	47	83	95	93	116	61	72	83	75	100	63	75	112	4.14	2.93	4.7	4.08	3.42	3.53
SK1G00039870	MergePeak_572	quadrant5	no	79	52	64	60	63	90	71	66	33	29	32	41	44	72	38	52	42	42	42	37	20	38	60	28	16	20	26	15	56	33	47	31	26	46	29	55	34	71	56	21	2.72	2.01	2.59	2.35	2.37	3.41
SK1G00039870	MergePeak_573	quadrant5	no	79	52	64	60	63	90	71	66	33	29	32	41	44	72	38	52	42	42	42	37	20	38	60	28	16	20	26	15	56	33	47	31	26	46	29	55	34	71	56	21	2.72	2.01	2.59	2.35	2.37	3.41
SK1G00039870	MergePeak_574	quadrant5	no	79	52	64	60	63	90	71	66	33	29	32	41	44	72	38	52	42	42	42	37	20	38	60	28	16	20	26	15	56	33	47	31	26	46	29	55	34	71	56	21	2.72	2.01	2.59	2.35	2.37	3.41
SK1G00039871	MergePeak_573	quadrant8	no	628	286	528	450	553	386	421	389	305	272	201	342	194	281	322	612	358	308	182	237	165	118	127	89	97	74	69	72	90	88	141	152	122	117	99	149	128	115	119	70	11.44	5.85	11.32	9.33	11.01	7.73
SK1G00039871	MergePeak_574	quadrant8	no	628	286	528	450	553	386	421	389	305	272	201	342	194	281	322	612	358	308	182	237	165	118	127	89	97	74	69	72	90	88	141	152	122	117	99	149	128	115	119	70	11.44	5.85	11.32	9.33	11.01	7.73
SK1G00039875	MergePeak_575	quadrant5	no	551	435	502	504	464	468	543	465	518	536	493	619	599	615	504	767	652	828	651	801	749	722	868	805	861	891	817	821	968	974	916	750	907	818	970	1025	920	983	1041	998	9.68	8.58	10.38	10.08	8.91	9.04
SK1G00039875	MergePeak_576	quadrant5	no	551	435	502	504	464	468	543	465	518	536	493	619	599	615	504	767	652	828	651	801	749	722	868	805	861	891	817	821	968	974	916	750	907	818	970	1025	920	983	1041	998	9.68	8.58	10.38	10.08	8.91	9.04
SK1G00039875	MergePeak_577	quadrant5	no	551	435	502	504	464	468	543	465	518	536	493	619	599	615	504	767	652	828	651	801	749	722	868	805	861	891	817	821	968	974	916	750	907	818	970	1025	920	983	1041	998	9.68	8.58	10.38	10.08	8.91	9.04
SK1G00039875	MergePeak_578	quadrant4	no	551	435	502	504	464	468	543	465	518	536	493	619	599	615	504	767	652	828	651	801	749	722	868	805	861	891	817	821	968	974	916	750	907	818	970	1025	920	983	1041	998	9.68	8.58	10.38	10.08	8.91	9.04
SK1G00039879	MergePeak_579	quadrant5	no	40	25	41	29	37	48	36	37	35	42	50	36	37	38	35	51	42	29	37	23	50	33	39	14	19	26	26	38	31	40	53	35	36	26	38	37	45	44	44	54	2.57	1.81	3.11	2.12	2.6	3.4
SK1G00039880	MergePeak_580	quadrant5	no	115	129	89	115	102	109	88	93	67	48	133	90	142	113	117	137	115	117	84	109	118	112	184	127	41	92	89	81	118	98	126	112	96	114	119	127	128	99	97	94	3.11	3.92	2.83	3.54	3.01	3.24
SK1G00039883	MergePeak_581	quadrant5	no	0	0	0	0	0	0	0	0	0	0	0	0	0	0	0	0	0	0	0	0	0	0	0	0	0	0	0	0	0	0	0	0	0	0	0	0	0	0	0	0	0	0	0	0	0	0
SK1G00039884	MergePeak_582	quadrant2	no	276	246	261	246	247	213	328	257	262	311	340	304	349	350	298	448	363	515	421	357	447	454	824	885	1037	948	787	733	839	911	735	623	992	664	1061	901	826	1196	1052	957	5.53	5.54	6.16	5.61	5.41	4.7
SK1G00039884	MergePeak_583	quadrant2	no	276	246	261	246	247	213	328	257	262	311	340	304	349	350	298	448	363	515	421	357	447	454	824	885	1037	948	787	733	839	911	735	623	992	664	1061	901	826	1196	1052	957	5.53	5.54	6.16	5.61	5.41	4.7
SK1G00039884	MergePeak_584	quadrant2	no	276	246	261	246	247	213	328	257	262	311	340	304	349	350	298	448	363	515	421	357	447	454	824	885	1037	948	787	733	839	911	735	623	992	664	1061	901	826	1196	1052	957	5.53	5.54	6.16	5.61	5.41	4.7
SK1G00039884	MergePeak_585	quadrant2	no	276	246	261	246	247	213	328	257	262	311	340	304	349	350	298	448	363	515	421	357	447	454	824	885	1037	948	787	733	839	911	735	623	992	664	1061	901	826	1196	1052	957	5.53	5.54	6.16	5.61	5.41	4.7
SK1G00039885	MergePeak_586	quadrant5	no	722	571	813	904	743	807	1057	845	1140	1105	1017	1647	1195	1101	1055	1551	1222	1561	1758	1392	1709	1188	1917	1911	1988	2494	2491	1978	1782	2100	1951	1707	2021	1379	1992	2241	2766	2528	2114	2192	24.24	21.52	32.14	34.54	27.26	29.79
SK1G00039889	MergePeak_587	quadrant8	no	170	197	166	139	175	189	126	89	91	37	60	79	87	47	90	100	54	88	53	39	59	38	123	73	49	53	47	31	76	39	22	18	22	49	34	30	30	47	43	80	7.88	10.26	9.07	7.34	8.87	9.64
SK1G00039890	MergePeak_588	quadrant5	no	55	117	24	98	124	90	94	118	58	65	109	57	100	47	125	70	60	60	77	78	72	61	91	57	45	63	47	53	66	69	33	34	34	62	36	47	42	46	35	97	1.01	2.41	0.52	2.05	2.49	1.82
SK1G00039891	MergePeak_589	quadrant5	no	291	297	263	250	305	269	301	249	302	237	222	309	380	260	235	370	331	359	273	309	230	321	451	355	320	337	333	323	368	413	357	347	460	328	407	484	449	446	500	484	13.07	14.98	13.92	12.78	14.98	13.29
SK1G00039891	MergePeak_590	quadrant5	no	291	297	263	250	305	269	301	249	302	237	222	309	380	260	235	370	331	359	273	309	230	321	451	355	320	337	333	323	368	413	357	347	460	328	407	484	449	446	500	484	13.07	14.98	13.92	12.78	14.98	13.29
SK1G00039894	MergePeak_591	quadrant5	no	1416	1126	1291	1249	1315	1294	1499	1144	1567	1747	1888	2450	2048	2186	1960	2577	2485	2764	2921	2542	2949	2558	2956	2344	1773	2051	2176	2484	2944	2390	3190	2383	2884	2317	2380	3191	3037	2730	3145	2568	48.8	43.57	52.4	48.99	49.54	49.05
SK1G00039894	MergePeak_592	quadrant5	no	1416	1126	1291	1249	1315	1294	1499	1144	1567	1747	1888	2450	2048	2186	1960	2577	2485	2764	2921	2542	2949	2558	2956	2344	1773	2051	2176	2484	2944	2390	3190	2383	2884	2317	2380	3191	3037	2730	3145	2568	48.8	43.57	52.4	48.99	49.54	49.05
SK1G00039895	MergePeak_593	quadrant5	no	396	424	300	337	298	328	339	329	307	308	288	396	391	428	521	454	503	621	439	490	470	517	659	510	406	434	366	506	621	597	603	524	515	499	526	569	541	512	675	573	12.67	15.29	11.4	12.31	10.49	11.54
SK1G00039895	MergePeak_594	quadrant5	no	396	424	300	337	298	328	339	329	307	308	288	396	391	428	521	454	503	621	439	490	470	517	659	510	406	434	366	506	621	597	603	524	515	499	526	569	541	512	675	573	12.67	15.29	11.4	12.31	10.49	11.54
SK1G00039896	MergePeak_595	quadrant5	no	605	509	583	706	651	687	938	682	449	344	461	608	561	605	482	916	636	531	569	571	499	525	558	350	269	369	377	358	449	348	362	306	392	320	294	407	329	394	408	355	20.51	19.37	23.28	27.24	24.12	25.61
SK1G00039898	MergePeak_596	quadrant8	no	1815	1903	1446	1582	1607	1576	1900	1134	1048	761	1029	929	1035	655	889	1245	793	834	585	686	528	445	929	506	435	675	704	473	493	414	513	583	658	356	461	471	735	477	805	547	104.33	122.83	97.89	103.51	100.97	99.63
SK1G00039898	MergePeak_597	quadrant8	no	1815	1903	1446	1582	1607	1576	1900	1134	1048	761	1029	929	1035	655	889	1245	793	834	585	686	528	445	929	506	435	675	704	473	493	414	513	583	658	356	461	471	735	477	805	547	104.33	122.83	97.89	103.51	100.97	99.63
SK1G00039899	MergePeak_598	quadrant5	no	838	661	772	745	801	641	610	635	721	784	725	1021	808	759	793	1040	998	970	689	947	708	782	936	688	534	675	478	724	832	1150	1078	885	970	782	777	946	761	745	1003	818	26.18	23.19	28.4	26.49	27.35	22.02
SK1G00039899	MergePeak_599	quadrant5	no	838	661	772	745	801	641	610	635	721	784	725	1021	808	759	793	1040	998	970	689	947	708	782	936	688	534	675	478	724	832	1150	1078	885	970	782	777	946	761	745	1003	818	26.18	23.19	28.4	26.49	27.35	22.02
SK1G00039900	MergePeak_600	quadrant5	no	2256	1835	2500	2636	2766	2689	3278	2725	3571	3538	3257	4511	4077	3855	3471	4860	3829	5026	4009	4554	4258	3770	5191	4519	4763	4666	4632	4397	4515	5040	5242	4752	5632	4666	5703	6047	6359	5854	6253	5848	58.24	53.19	76.01	77.46	78.05	76.34
SK1G00039900	MergePeak_601	quadrant5	no	2256	1835	2500	2636	2766	2689	3278	2725	3571	3538	3257	4511	4077	3855	3471	4860	3829	5026	4009	4554	4258	3770	5191	4519	4763	4666	4632	4397	4515	5040	5242	4752	5632	4666	5703	6047	6359	5854	6253	5848	58.24	53.19	76.01	77.46	78.05	76.34
SK1G00039901	MergePeak_602	quadrant5	no	718	730	712	700	716	686	737	513	609	527	519	522	567	514	466	691	593	644	510	579	489	509	929	631	491	526	537	619	832	815	639	597	623	749	615	759	507	661	774	861	10.61	12.12	12.4	11.78	11.57	11.15
SK1G00039904	MergePeak_603	quadrant5	no	414	341	340	336	372	295	346	279	295	337	306	398	335	231	344	441	408	462	320	374	293	316	394	211	294	279	330	318	410	391	392	301	404	391	438	376	388	369	439	412	15.56	14.39	15.05	14.38	15.29	12.2
SK1G00039906	MergePeak_604	quadrant5	no	1245	1075	1015	1036	1024	998	1162	966	1056	911	912	1093	1041	967	931	1267	1187	1263	1093	1140	1035	1099	1354	1111	1013	1047	1085	1096	1415	1378	1156	1032	1357	1100	1267	1437	1311	1358	1615	1382	34.8	33.74	33.41	32.96	31.29	30.68
SK1G00039906	MergePeak_605	quadrant5	no	1245	1075	1015	1036	1024	998	1162	966	1056	911	912	1093	1041	967	931	1267	1187	1263	1093	1140	1035	1099	1354	1111	1013	1047	1085	1096	1415	1378	1156	1032	1357	1100	1267	1437	1311	1358	1615	1382	34.8	33.74	33.41	32.96	31.29	30.68
SK1G00039907	MergePeak_606	quadrant5	no	2914	2534	2777	2791	3207	2961	3434	3150	3743	3772	3569	4665	4206	3801	3875	5305	4867	5545	4809	5104	4954	4587	6670	5702	6012	5762	5568	5503	6279	6976	6332	5649	6541	5885	6339	7720	7147	7325	7809	7334	47.52	46.4	53.34	51.81	57.17	53.11
SK1G00039907	MergePeak_607	quadrant5	no	2914	2534	2777	2791	3207	2961	3434	3150	3743	3772	3569	4665	4206	3801	3875	5305	4867	5545	4809	5104	4954	4587	6670	5702	6012	5762	5568	5503	6279	6976	6332	5649	6541	5885	6339	7720	7147	7325	7809	7334	47.52	46.4	53.34	51.81	57.17	53.11
SK1G00039908	MergePeak_608	quadrant5	no	305	586	298	433	550	621	404	363	419	273	350	389	769	624	576	620	651	793	580	612	655	605	1232	953	1272	1084	1067	968	1280	1223	918	987	1237	1052	1307	1271	1067	1448	1540	1487	2.95	5.97	3.46	4.62	5.55	6.29
SK1G00039908	MergePeak_609	quadrant4	no	305	586	298	433	550	621	404	363	419	273	350	389	769	624	576	620	651	793	580	612	655	605	1232	953	1272	1084	1067	968	1280	1223	918	987	1237	1052	1307	1271	1067	1448	1540	1487	2.95	5.97	3.46	4.62	5.55	6.29
SK1G00039908	MergePeak_610	quadrant4	no	305	586	298	433	550	621	404	363	419	273	350	389	769	624	576	620	651	793	580	612	655	605	1232	953	1272	1084	1067	968	1280	1223	918	987	1237	1052	1307	1271	1067	1448	1540	1487	2.95	5.97	3.46	4.62	5.55	6.29
SK1G00039908	MergePeak_611	quadrant5	no	305	586	298	433	550	621	404	363	419	273	350	389	769	624	576	620	651	793	580	612	655	605	1232	953	1272	1084	1067	968	1280	1223	918	987	1237	1052	1307	1271	1067	1448	1540	1487	2.95	5.97	3.46	4.62	5.55	6.29
SK1G00039908	MergePeak_612	quadrant6	no	305	586	298	433	550	621	404	363	419	273	350	389	769	624	576	620	651	793	580	612	655	605	1232	953	1272	1084	1067	968	1280	1223	918	987	1237	1052	1307	1271	1067	1448	1540	1487	2.95	5.97	3.46	4.62	5.55	6.29
SK1G00039908	MergePeak_613	quadrant5	no	305	586	298	433	550	621	404	363	419	273	350	389	769	624	576	620	651	793	580	612	655	605	1232	953	1272	1084	1067	968	1280	1223	918	987	1237	1052	1307	1271	1067	1448	1540	1487	2.95	5.97	3.46	4.62	5.55	6.29
SK1G00039909	MergePeak_614	quadrant5	no	340	253	234	187	341	257	233	307	239	213	201	198	247	311	224	274	225	299	205	315	214	243	482	402	484	400	410	354	522	500	578	392	524	486	705	572	455	691	648	615	3.14	2.58	2.49	1.92	3.36	2.59
SK1G00039909	MergePeak_615	quadrant5	no	340	253	234	187	341	257	233	307	239	213	201	198	247	311	224	274	225	299	205	315	214	243	482	402	484	400	410	354	522	500	578	392	524	486	705	572	455	691	648	615	3.14	2.58	2.49	1.92	3.36	2.59
SK1G00039909	MergePeak_616	quadrant5	no	340	253	234	187	341	257	233	307	239	213	201	198	247	311	224	274	225	299	205	315	214	243	482	402	484	400	410	354	522	500	578	392	524	486	705	572	455	691	648	615	3.14	2.58	2.49	1.92	3.36	2.59
SK1G00039909	MergePeak_617	quadrant5	no	340	253	234	187	341	257	233	307	239	213	201	198	247	311	224	274	225	299	205	315	214	243	482	402	484	400	410	354	522	500	578	392	524	486	705	572	455	691	648	615	3.14	2.58	2.49	1.92	3.36	2.59
SK1G00039912	MergePeak_618	quadrant5	no	314	353	229	357	346	456	341	283	273	206	220	189	396	330	318	279	372	363	259	229	354	254	404	420	301	327	369	290	339	322	280	220	293	268	303	253	303	410	342	475	11.68	14.75	10.04	15.12	14.07	18.66
SK1G00039912	MergePeak_619	quadrant5	no	314	353	229	357	346	456	341	283	273	206	220	189	396	330	318	279	372	363	259	229	354	254	404	420	301	327	369	290	339	322	280	220	293	268	303	253	303	410	342	475	11.68	14.75	10.04	15.12	14.07	18.66
SK1G00039913	MergePeak_620	quadrant5	no	9368	5961	8559	6771	8406	6943	8158	7935	7878	7498	7516	9338	9442	8205	7905	10293	9024	10001	7503	10537	7183	8674	8810	8210	7210	8034	6502	8190	10080	10522	9832	8140	9239	8590	9818	11753	9075	10539	10699	9013	240.24	171.65	258.51	197.64	235.64	195.82
SK1G00039913	MergePeak_621	quadrant5	no	9368	5961	8559	6771	8406	6943	8158	7935	7878	7498	7516	9338	9442	8205	7905	10293	9024	10001	7503	10537	7183	8674	8810	8210	7210	8034	6502	8190	10080	10522	9832	8140	9239	8590	9818	11753	9075	10539	10699	9013	240.24	171.65	258.51	197.64	235.64	195.82
SK1G00039913	MergePeak_622	quadrant5	no	9368	5961	8559	6771	8406	6943	8158	7935	7878	7498	7516	9338	9442	8205	7905	10293	9024	10001	7503	10537	7183	8674	8810	8210	7210	8034	6502	8190	10080	10522	9832	8140	9239	8590	9818	11753	9075	10539	10699	9013	240.24	171.65	258.51	197.64	235.64	195.82
SK1G00039913	MergePeak_623	quadrant5	no	9368	5961	8559	6771	8406	6943	8158	7935	7878	7498	7516	9338	9442	8205	7905	10293	9024	10001	7503	10537	7183	8674	8810	8210	7210	8034	6502	8190	10080	10522	9832	8140	9239	8590	9818	11753	9075	10539	10699	9013	240.24	171.65	258.51	197.64	235.64	195.82
SK1G00039914	MergePeak_624	quadrant5	no	284	278	226	241	247	307	281	258	255	236	309	284	348	313	307	352	381	407	335	311	412	323	419	292	314	340	330	355	446	415	385	301	370	365	391	478	416	353	432	391	10.09	11.09	9.46	9.75	9.59	12
SK1G00039917	MergePeak_625	quadrant5	no	348	329	332	272	203	172	211	154	367	304	237	323	256	246	261	346	272	383	312	310	312	324	478	483	779	356	363	374	502	527	408	349	640	372	465	467	363	667	573	550	4.5	4.78	5.06	4	2.87	2.45
SK1G00039918	MergePeak_626	quadrant5	no	51	52	30	58	50	45	48	31	33	35	54	61	46	45	50	75	61	82	38	38	44	60	56	24	40	53	41	24	36	57	46	38	56	39	47	47	53	54	48	37	2.12	2.42	1.47	2.74	2.27	2.05
SK1G00039920	MergePeak_627	quadrant5	no	637	494	521	422	535	489	562	481	496	459	490	560	622	489	510	690	746	747	595	720	554	656	865	819	791	788	755	729	994	781	702	746	945	734	907	879	898	967	1208	1006	12.05	10.49	11.6	9.08	11.06	10.17
SK1G00039920	MergePeak_628	quadrant5	no	637	494	521	422	535	489	562	481	496	459	490	560	622	489	510	690	746	747	595	720	554	656	865	819	791	788	755	729	994	781	702	746	945	734	907	879	898	967	1208	1006	12.05	10.49	11.6	9.08	11.06	10.17
SK1G00039920	MergePeak_629	quadrant5	no	637	494	521	422	535	489	562	481	496	459	490	560	622	489	510	690	746	747	595	720	554	656	865	819	791	788	755	729	994	781	702	746	945	734	907	879	898	967	1208	1006	12.05	10.49	11.6	9.08	11.06	10.17
SK1G00039921	MergePeak_630	quadrant5	no	509	756	556	597	585	529	650	496	506	459	431	466	598	440	444	593	507	543	449	504	435	512	523	450	389	386	432	423	459	518	456	416	480	498	463	507	488	479	566	554	29.2	48.71	37.57	38.99	36.69	33.38
SK1G00039921	MergePeak_631	quadrant5	no	509	756	556	597	585	529	650	496	506	459	431	466	598	440	444	593	507	543	449	504	435	512	523	450	389	386	432	423	459	518	456	416	480	498	463	507	488	479	566	554	29.2	48.71	37.57	38.99	36.69	33.38
SK1G00039922	MergePeak_632	quadrant8	no	11159	10968	6102	9197	7607	9577	6665	5738	5181	5098	5358	4375	4955	4539	4008	5947	5770	5926	4790	3730	4371	4250	3879	3440	1861	2063	1914	2491	4425	3387	3543	2918	3308	2380	3264	3340	3265	3354	3056	4034	446.77	493.08	287.73	419.12	332.92	421.69
SK1G00039922	MergePeak_633	quadrant8	no	11159	10968	6102	9197	7607	9577	6665	5738	5181	5098	5358	4375	4955	4539	4008	5947	5770	5926	4790	3730	4371	4250	3879	3440	1861	2063	1914	2491	4425	3387	3543	2918	3308	2380	3264	3340	3265	3354	3056	4034	446.77	493.08	287.73	419.12	332.92	421.69
SK1G00039923	MergePeak_634	quadrant5	no	488	469	465	594	508	555	598	483	582	720	597	698	708	637	591	894	730	905	732	761	761	715	917	779	566	559	619	668	846	773	767	696	795	661	652	916	908	703	851	907	26.74	28.86	30.01	37.05	30.43	33.45
SK1G00039923	MergePeak_635	quadrant5	no	488	469	465	594	508	555	598	483	582	720	597	698	708	637	591	894	730	905	732	761	761	715	917	779	566	559	619	668	846	773	767	696	795	661	652	916	908	703	851	907	26.74	28.86	30.01	37.05	30.43	33.45
SK1G00039923	MergePeak_636	quadrant5	no	488	469	465	594	508	555	598	483	582	720	597	698	708	637	591	894	730	905	732	761	761	715	917	779	566	559	619	668	846	773	767	696	795	661	652	916	908	703	851	907	26.74	28.86	30.01	37.05	30.43	33.45
SK1G00039924	MergePeak_637	quadrant5	no	60	141	60	70	80	82	73	42	48	77	53	61	94	65	59	56	71	82	67	68	81	44	58	39	36	38	37	63	44	46	44	52	51	43	46	26	52	51	53	56	2.99	7.89	3.52	3.97	4.36	4.49
SK1G00039927	MergePeak_638	quadrant5	no	162	113	152	139	103	106	124	101	101	114	102	119	135	145	76	165	150	117	94	159	120	146	161	147	103	108	102	120	172	139	117	136	150	133	126	183	141	140	157	158	8.01	6.27	8.85	7.82	5.57	5.76
SK1G00039927	MergePeak_639	quadrant5	no	162	113	152	139	103	106	124	101	101	114	102	119	135	145	76	165	150	117	94	159	120	146	161	147	103	108	102	120	172	139	117	136	150	133	126	183	141	140	157	158	8.01	6.27	8.85	7.82	5.57	5.76
SK1G00039928	MergePeak_640	quadrant5	no	1111	889	1078	983	1124	960	1098	1072	1069	896	1041	1246	1240	1103	955	1361	1368	1539	1049	1370	1130	1164	1617	1359	1118	1195	1080	1243	1599	1547	1226	1245	1319	1321	1334	1590	1400	1458	1738	1641	14.43	12.97	16.49	14.54	15.96	13.72
SK1G00039928	MergePeak_641	quadrant5	no	1111	889	1078	983	1124	960	1098	1072	1069	896	1041	1246	1240	1103	955	1361	1368	1539	1049	1370	1130	1164	1617	1359	1118	1195	1080	1243	1599	1547	1226	1245	1319	1321	1334	1590	1400	1458	1738	1641	14.43	12.97	16.49	14.54	15.96	13.72
SK1G00039928	MergePeak_642	quadrant5	no	1111	889	1078	983	1124	960	1098	1072	1069	896	1041	1246	1240	1103	955	1361	1368	1539	1049	1370	1130	1164	1617	1359	1118	1195	1080	1243	1599	1547	1226	1245	1319	1321	1334	1590	1400	1458	1738	1641	14.43	12.97	16.49	14.54	15.96	13.72
SK1G00039928	MergePeak_643	quadrant5	no	1111	889	1078	983	1124	960	1098	1072	1069	896	1041	1246	1240	1103	955	1361	1368	1539	1049	1370	1130	1164	1617	1359	1118	1195	1080	1243	1599	1547	1226	1245	1319	1321	1334	1590	1400	1458	1738	1641	14.43	12.97	16.49	14.54	15.96	13.72
SK1G00039928	MergePeak_644	quadrant5	no	1111	889	1078	983	1124	960	1098	1072	1069	896	1041	1246	1240	1103	955	1361	1368	1539	1049	1370	1130	1164	1617	1359	1118	1195	1080	1243	1599	1547	1226	1245	1319	1321	1334	1590	1400	1458	1738	1641	14.43	12.97	16.49	14.54	15.96	13.72
SK1G00039931	MergePeak_645	quadrant5	no	465	384	421	441	410	444	523	417	517	493	501	584	583	551	454	643	573	715	604	551	568	629	621	512	516	506	500	526	673	581	543	542	656	505	635	658	708	649	796	648	14.37	13.32	15.32	15.51	13.85	15.09
SK1G00039931	MergePeak_646	quadrant5	no	465	384	421	441	410	444	523	417	517	493	501	584	583	551	454	643	573	715	604	551	568	629	621	512	516	506	500	526	673	581	543	542	656	505	635	658	708	649	796	648	14.37	13.32	15.32	15.51	13.85	15.09
SK1G00039935	MergePeak_647	quadrant5	no	239	138	305	309	352	418	501	403	659	617	742	1082	763	579	924	1115	793	1047	1045	801	1121	780	846	931	868	1292	1095	834	711	785	1359	938	1101	702	1133	934	1280	1007	997	1158	12.79	8.29	19.23	18.82	20.59	24.6
SK1G00039935	MergePeak_648	quadrant5	no	239	138	305	309	352	418	501	403	659	617	742	1082	763	579	924	1115	793	1047	1045	801	1121	780	846	931	868	1292	1095	834	711	785	1359	938	1101	702	1133	934	1280	1007	997	1158	12.79	8.29	19.23	18.82	20.59	24.6
SK1G00039935	MergePeak_649	quadrant5	no	239	138	305	309	352	418	501	403	659	617	742	1082	763	579	924	1115	793	1047	1045	801	1121	780	846	931	868	1292	1095	834	711	785	1359	938	1101	702	1133	934	1280	1007	997	1158	12.79	8.29	19.23	18.82	20.59	24.6
SK1G00039936	MergePeak_650	quadrant5	no	1391	1371	1358	1870	1712	1745	2245	1939	2317	2286	2399	2831	2547	2089	2130	2716	2444	2663	2897	2266	2929	2408	2639	2321	2320	2442	2649	2280	2333	2377	2714	2544	2891	2105	2477	2721	3970	2224	3044	3110	62.77	69.47	72.17	96.05	84.45	86.6
SK1G00039936	MergePeak_651	quadrant5	no	1391	1371	1358	1870	1712	1745	2245	1939	2317	2286	2399	2831	2547	2089	2130	2716	2444	2663	2897	2266	2929	2408	2639	2321	2320	2442	2649	2280	2333	2377	2714	2544	2891	2105	2477	2721	3970	2224	3044	3110	62.77	69.47	72.17	96.05	84.45	86.6
SK1G00039937	MergePeak_651	quadrant5	no	960	893	996	871	930	890	891	855	1011	906	793	1077	1135	1022	928	1371	1144	1440	1011	1218	1066	1138	1416	1134	1097	1133	1084	1106	1303	1417	1323	1193	1412	1197	1358	1613	1486	1522	1666	1537	30.58	32	37.39	31.67	32.39	31.25
SK1G00039937	MergePeak_652	quadrant5	no	960	893	996	871	930	890	891	855	1011	906	793	1077	1135	1022	928	1371	1144	1440	1011	1218	1066	1138	1416	1134	1097	1133	1084	1106	1303	1417	1323	1193	1412	1197	1358	1613	1486	1522	1666	1537	30.58	32	37.39	31.67	32.39	31.25
SK1G00039938	MergePeak_653	quadrant5	no	419	392	448	428	408	458	649	440	641	564	570	717	720	533	686	814	667	810	741	669	677	643	835	857	814	891	934	761	790	885	921	714	922	680	965	929	1051	1005	949	1077	8.54	8.97	10.75	9.93	9.09	10.27
SK1G00039938	MergePeak_654	quadrant5	no	419	392	448	428	408	458	649	440	641	564	570	717	720	533	686	814	667	810	741	669	677	643	835	857	814	891	934	761	790	885	921	714	922	680	965	929	1051	1005	949	1077	8.54	8.97	10.75	9.93	9.09	10.27
SK1G00039938	MergePeak_655	quadrant5	no	419	392	448	428	408	458	649	440	641	564	570	717	720	533	686	814	667	810	741	669	677	643	835	857	814	891	934	761	790	885	921	714	922	680	965	929	1051	1005	949	1077	8.54	8.97	10.75	9.93	9.09	10.27
SK1G00039938	MergePeak_656	quadrant5	no	419	392	448	428	408	458	649	440	641	564	570	717	720	533	686	814	667	810	741	669	677	643	835	857	814	891	934	761	790	885	921	714	922	680	965	929	1051	1005	949	1077	8.54	8.97	10.75	9.93	9.09	10.27
SK1G00039939	MergePeak_657	quadrant2	no	34	16	33	34	28	27	48	46	44	39	37	39	66	61	51	61	72	58	69	76	72	67	109	142	145	133	101	114	99	146	117	94	129	90	210	126	100	133	134	141	2.67	1.41	3.05	3.04	2.4	2.33
SK1G00039940	MergePeak_658	quadrant5	no	123	86	122	135	152	128	83	147	122	123	111	144	170	128	154	118	159	176	150	188	118	137	173	100	119	125	96	111	127	153	167	146	152	143	177	179	122	124	228	125	5.36	4.21	6.27	6.7	7.25	6.14
SK1G00039940	MergePeak_659	quadrant5	no	123	86	122	135	152	128	83	147	122	123	111	144	170	128	154	118	159	176	150	188	118	137	173	100	119	125	96	111	127	153	167	146	152	143	177	179	122	124	228	125	5.36	4.21	6.27	6.7	7.25	6.14
SK1G00039941	MergePeak_660	quadrant5	no	479	453	386	416	430	425	447	385	594	546	529	586	710	603	586	768	678	815	645	767	807	734	892	913	943	817	778	830	1020	854	1048	886	996	753	934	1178	1062	980	1090	1014	15.77	16.75	14.97	15.59	15.48	15.39
SK1G00039941	MergePeak_661	quadrant5	no	479	453	386	416	430	425	447	385	594	546	529	586	710	603	586	768	678	815	645	767	807	734	892	913	943	817	778	830	1020	854	1048	886	996	753	934	1178	1062	980	1090	1014	15.77	16.75	14.97	15.59	15.48	15.39
SK1G00039943	MergePeak_662	quadrant5	no	15	22	16	15	24	19	18	16	14	12	9	17	9	11	5	19	10	13	17	12	12	28	25	30	20	19	19	19	19	18	33	17	16	20	15	21	30	32	43	42	2.96	4.87	3.72	3.37	5.18	4.12
SK1G00039945	MergePeak_663	quadrant5	no	4606	3647	2809	3716	3183	4018	3471	2844	2900	2728	2924	3038	2901	2862	2293	3462	3022	3237	2692	2448	2414	2723	2740	2646	1675	1854	1646	1863	2577	2433	2408	2262	2383	1846	2119	2914	2639	2364	2738	2726	186.57	165.88	134.01	171.33	140.94	179
SK1G00039945	MergePeak_664	quadrant5	no	4606	3647	2809	3716	3183	4018	3471	2844	2900	2728	2924	3038	2901	2862	2293	3462	3022	3237	2692	2448	2414	2723	2740	2646	1675	1854	1646	1863	2577	2433	2408	2262	2383	1846	2119	2914	2639	2364	2738	2726	186.57	165.88	134.01	171.33	140.94	179
SK1G00039945	MergePeak_665	quadrant5	no	4606	3647	2809	3716	3183	4018	3471	2844	2900	2728	2924	3038	2901	2862	2293	3462	3022	3237	2692	2448	2414	2723	2740	2646	1675	1854	1646	1863	2577	2433	2408	2262	2383	1846	2119	2914	2639	2364	2738	2726	186.57	165.88	134.01	171.33	140.94	179
SK1G00039946	MergePeak_666	quadrant5	no	1370	1001	1090	1323	1375	1284	1560	1255	1457	1332	1341	1685	1662	1411	1378	1971	1609	1897	1630	1722	1690	1611	1916	1949	1902	2329	2151	1781	1819	1936	2010	1699	2085	1732	2052	2352	2207	2303	2273	2135	71.84	58.94	67.31	78.96	78.81	74.05
SK1G00039946	MergePeak_667	quadrant5	no	1370	1001	1090	1323	1375	1284	1560	1255	1457	1332	1341	1685	1662	1411	1378	1971	1609	1897	1630	1722	1690	1611	1916	1949	1902	2329	2151	1781	1819	1936	2010	1699	2085	1732	2052	2352	2207	2303	2273	2135	71.84	58.94	67.31	78.96	78.81	74.05
SK1G00039947	MergePeak_668	quadrant5	no	65	32	51	42	61	40	45	42	34	38	26	51	43	30	27	53	37	57	42	48	29	29	35	35	38	40	48	35	31	32	43	27	35	35	59	53	40	49	43	34	9.83	5.43	9.08	7.23	10.08	6.65
SK1G00039948	MergePeak_669	quadrant5	no	6413	5027	6868	7019	6839	6348	8393	6440	7313	7149	7097	8848	7888	6428	6557	9846	7891	9367	8455	8404	7954	8207	9234	8235	9150	9847	10355	8426	8875	8832	9476	8186	11201	8040	10183	10803	10848	10493	11686	10275	194.1	170.84	244.82	241.81	226.27	211.3
SK1G00039948	MergePeak_670	quadrant5	no	6413	5027	6868	7019	6839	6348	8393	6440	7313	7149	7097	8848	7888	6428	6557	9846	7891	9367	8455	8404	7954	8207	9234	8235	9150	9847	10355	8426	8875	8832	9476	8186	11201	8040	10183	10803	10848	10493	11686	10275	194.1	170.84	244.82	241.81	226.27	211.3
SK1G00039948	MergePeak_671	quadrant5	no	6413	5027	6868	7019	6839	6348	8393	6440	7313	7149	7097	8848	7888	6428	6557	9846	7891	9367	8455	8404	7954	8207	9234	8235	9150	9847	10355	8426	8875	8832	9476	8186	11201	8040	10183	10803	10848	10493	11686	10275	194.1	170.84	244.82	241.81	226.27	211.3
SK1G00039952	MergePeak_672	quadrant5	no	526	558	507	473	520	423	518	399	393	408	320	400	492	324	389	528	528	442	379	419	336	372	430	417	340	363	378	384	429	415	415	350	443	381	391	577	340	525	507	451	12.16	14.48	13.8	12.45	13.14	10.75
SK1G00039953	MergePeak_673	quadrant5	no	83	46	88	82	72	71	97	97	74	72	100	98	81	88	83	127	96	126	100	131	112	113	130	102	134	118	112	102	170	116	144	144	153	92	195	205	146	123	177	166	3.63	2.26	4.53	4.08	3.44	3.41
SK1G00039955	MergePeak_674	quadrant5	no	303	210	280	287	319	311	364	363	241	282	291	365	406	396	380	442	357	417	350	536	382	421	587	609	740	667	537	493	641	651	673	525	543	510	636	690	550	768	623	645	12.5	9.73	13.61	13.48	14.39	14.11
SK1G00039955	MergePeak_675	quadrant5	no	303	210	280	287	319	311	364	363	241	282	291	365	406	396	380	442	357	417	350	536	382	421	587	609	740	667	537	493	641	651	673	525	543	510	636	690	550	768	623	645	12.5	9.73	13.61	13.48	14.39	14.11
SK1G00039956	MergePeak_676	quadrant5	no	341	519	237	570	446	562	433	401	392	292	324	318	487	425	571	411	504	439	448	384	509	331	427	404	361	343	283	315	434	395	213	252	278	263	271	270	338	313	263	408	6.34	10.84	5.19	12.07	9.07	11.5
SK1G00039958	MergePeak_677	quadrant8	no	2464	1473	1463	1198	1226	702	999	521	272	224	658	366	417	387	328	911	537	357	220	313	201	105	342	145	137	227	233	301	206	258	208	227	465	56	181	114	240	184	450	108	213.54	143.34	149.32	118.17	116.14	66.91
SK1G00039960	MergePeak_678	quadrant5	no	90	41	107	58	55	56	89	41	46	30	43	58	38	62	58	73	70	51	44	71	24	33	45	32	33	41	31	29	48	42	17	49	64	27	54	58	61	51	81	41	12.26	6.27	17.17	9	8.19	8.39
SK1G00039964	MergePeak_679	quadrant5	no	405	350	317	327	317	296	326	292	346	308	292	360	357	349	282	431	378	412	361	360	308	336	351	324	310	317	272	294	342	366	373	304	387	300	339	393	372	356	418	343	21.31	20.68	19.64	19.58	18.23	17.13
SK1G00039964	MergePeak_680	quadrant5	no	405	350	317	327	317	296	326	292	346	308	292	360	357	349	282	431	378	412	361	360	308	336	351	324	310	317	272	294	342	366	373	304	387	300	339	393	372	356	418	343	21.31	20.68	19.64	19.58	18.23	17.13
SK1G00039965	MergePeak_681	quadrant8	no	1791	1400	1676	2160	2520	2426	4014	2780	1759	1539	1477	2038	1474	713	1492	1564	1387	1203	861	765	912	598	846	310	488	584	911	317	258	267	496	651	406	349	356	321	761	203	687	481	102.95	90.36	113.46	141.32	158.34	153.36
SK1G00039966	MergePeak_682	quadrant5	no	965	705	819	778	999	975	1230	1204	1188	1255	1328	1807	1769	1314	1508	2007	1903	2422	1903	2227	2349	2250	2325	1939	1876	1852	1757	2483	2598	2422	2461	2458	2515	2416	2252	2617	2512	1829	2531	2608	10.1	8.29	10.1	9.27	11.43	11.22
SK1G00039966	MergePeak_683	quadrant5	no	965	705	819	778	999	975	1230	1204	1188	1255	1328	1807	1769	1314	1508	2007	1903	2422	1903	2227	2349	2250	2325	1939	1876	1852	1757	2483	2598	2422	2461	2458	2515	2416	2252	2617	2512	1829	2531	2608	10.1	8.29	10.1	9.27	11.43	11.22
SK1G00039966	MergePeak_684	quadrant5	no	965	705	819	778	999	975	1230	1204	1188	1255	1328	1807	1769	1314	1508	2007	1903	2422	1903	2227	2349	2250	2325	1939	1876	1852	1757	2483	2598	2422	2461	2458	2515	2416	2252	2617	2512	1829	2531	2608	10.1	8.29	10.1	9.27	11.43	11.22
SK1G00039966	MergePeak_685	quadrant5	no	965	705	819	778	999	975	1230	1204	1188	1255	1328	1807	1769	1314	1508	2007	1903	2422	1903	2227	2349	2250	2325	1939	1876	1852	1757	2483	2598	2422	2461	2458	2515	2416	2252	2617	2512	1829	2531	2608	10.1	8.29	10.1	9.27	11.43	11.22
SK1G00039968	MergePeak_686	quadrant8	no	446	284	416	530	421	509	882	473	280	234	345	416	353	294	335	586	369	301	331	244	269	149	244	173	219	327	407	126	65	116	135	225	229	74	128	130	215	154	238	246	32.41	23.18	35.61	43.84	33.45	40.68
SK1G00039970	MergePeak_687	quadrant5	no	20	21	11	36	31	29	47	27	25	33	32	48	43	53	31	37	35	43	27	38	32	38	22	42	37	58	52	44	38	32	53	52	47	32	35	36	66	46	52	50	1.88	2.22	1.22	3.86	3.19	3
SK1G00039973	MergePeak_688	quadrant5	no	515	500	612	543	521	521	562	522	621	663	660	769	829	733	618	802	713	1079	784	824	866	850	1098	1127	958	1162	1040	1007	1058	1061	1218	1010	1331	986	1130	1373	1280	1386	1328	1211	19.81	21.6	27.73	23.78	21.91	22.05
SK1G00039973	MergePeak_689	quadrant5	no	515	500	612	543	521	521	562	522	621	663	660	769	829	733	618	802	713	1079	784	824	866	850	1098	1127	958	1162	1040	1007	1058	1061	1218	1010	1331	986	1130	1373	1280	1386	1328	1211	19.81	21.6	27.73	23.78	21.91	22.05
SK1G00039974	MergePeak_689	quadrant5	no	531	554	381	438	549	554	340	380	386	354	336	469	457	463	332	501	633	578	403	377	481	430	557	424	372	225	283	299	520	515	313	395	399	441	394	456	467	379	500	642	43.41	50.86	36.69	40.76	49.07	49.81
SK1G00039974	MergePeak_690	quadrant5	no	531	554	381	438	549	554	340	380	386	354	336	469	457	463	332	501	633	578	403	377	481	430	557	424	372	225	283	299	520	515	313	395	399	441	394	456	467	379	500	642	43.41	50.86	36.69	40.76	49.07	49.81
SK1G00039975	MergePeak_691	quadrant5	no	235	207	191	211	228	203	285	199	235	265	216	268	299	213	196	263	284	302	335	288	322	255	371	319	338	404	369	357	374	345	330	278	423	296	368	388	415	381	462	372	13.04	12.9	12.48	13.32	13.83	12.39
SK1G00039975	MergePeak_692	quadrant5	no	235	207	191	211	228	203	285	199	235	265	216	268	299	213	196	263	284	302	335	288	322	255	371	319	338	404	369	357	374	345	330	278	423	296	368	388	415	381	462	372	13.04	12.9	12.48	13.32	13.83	12.39
SK1G00039982	MergePeak_693	quadrant2	no	1312	1439	1663	2522	2341	2461	3910	3609	5104	5333	7882	9966	8572	5368	8232	10241	8776	11508	12658	9356	12645	9939	8846	8765	10154	13273	13189	11057	9019	9144	14862	11855	12409	8501	10970	11171	14571	11213	12151	11622	28.96	35.67	43.23	63.36	56.49	59.74
SK1G00039982	MergePeak_694	quadrant2	no	1312	1439	1663	2522	2341	2461	3910	3609	5104	5333	7882	9966	8572	5368	8232	10241	8776	11508	12658	9356	12645	9939	8846	8765	10154	13273	13189	11057	9019	9144	14862	11855	12409	8501	10970	11171	14571	11213	12151	11622	28.96	35.67	43.23	63.36	56.49	59.74
SK1G00039982	MergePeak_695	quadrant2	no	1312	1439	1663	2522	2341	2461	3910	3609	5104	5333	7882	9966	8572	5368	8232	10241	8776	11508	12658	9356	12645	9939	8846	8765	10154	13273	13189	11057	9019	9144	14862	11855	12409	8501	10970	11171	14571	11213	12151	11622	28.96	35.67	43.23	63.36	56.49	59.74
SK1G00039982	MergePeak_696	quadrant2	no	1312	1439	1663	2522	2341	2461	3910	3609	5104	5333	7882	9966	8572	5368	8232	10241	8776	11508	12658	9356	12645	9939	8846	8765	10154	13273	13189	11057	9019	9144	14862	11855	12409	8501	10970	11171	14571	11213	12151	11622	28.96	35.67	43.23	63.36	56.49	59.74
SK1G00039985	MergePeak_697	quadrant2	no	263	256	287	354	403	441	601	557	619	638	940	913	975	709	878	1126	943	1013	1226	727	1115	1047	1162	1448	1170	2221	1863	1018	1248	1193	1700	1280	1790	1105	1750	1511	1658	1923	1463	1913	8.37	9.15	10.76	12.83	14.02	15.44
SK1G00039986	MergePeak_698	quadrant5	no	74	63	84	63	71	74	38	44	71	65	50	66	65	80	63	85	79	71	65	71	71	77	102	101	93	140	113	111	105	113	103	81	90	93	93	104	104	130	125	152	6.41	6.13	8.57	6.21	6.73	7.05
SK1G00039986	MergePeak_699	quadrant5	no	74	63	84	63	71	74	38	44	71	65	50	66	65	80	63	85	79	71	65	71	71	77	102	101	93	140	113	111	105	113	103	81	90	93	93	104	104	130	125	152	6.41	6.13	8.57	6.21	6.73	7.05
SK1G00039989	MergePeak_700	quadrant5	no	195	130	178	174	220	195	232	164	213	233	247	263	337	279	214	347	316	364	335	316	309	384	496	443	469	465	406	439	446	443	532	412	538	436	395	485	494	600	517	488	9.97	7.47	10.72	10.13	12.3	10.97
SK1G00039989	MergePeak_701	quadrant5	no	195	130	178	174	220	195	232	164	213	233	247	263	337	279	214	347	316	364	335	316	309	384	496	443	469	465	406	439	446	443	532	412	538	436	395	485	494	600	517	488	9.97	7.47	10.72	10.13	12.3	10.97
SK1G00039989	MergePeak_702	quadrant5	no	195	130	178	174	220	195	232	164	213	233	247	263	337	279	214	347	316	364	335	316	309	384	496	443	469	465	406	439	446	443	532	412	538	436	395	485	494	600	517	488	9.97	7.47	10.72	10.13	12.3	10.97
SK1G00039992	MergePeak_703	quadrant5	no	1227	617	1077	821	1005	712	956	985	777	764	715	979	954	868	779	1058	1024	986	795	1195	882	1074	1607	1205	1367	1444	1141	1134	1426	1611	1520	1289	1539	1152	2115	1470	1225	1755	1803	1688	34.91	19.71	36.09	26.59	31.26	22.28
SK1G00039992	MergePeak_704	quadrant5	no	1227	617	1077	821	1005	712	956	985	777	764	715	979	954	868	779	1058	1024	986	795	1195	882	1074	1607	1205	1367	1444	1141	1134	1426	1611	1520	1289	1539	1152	2115	1470	1225	1755	1803	1688	34.91	19.71	36.09	26.59	31.26	22.28
SK1G00039992	MergePeak_705	quadrant5	no	1227	617	1077	821	1005	712	956	985	777	764	715	979	954	868	779	1058	1024	986	795	1195	882	1074	1607	1205	1367	1444	1141	1134	1426	1611	1520	1289	1539	1152	2115	1470	1225	1755	1803	1688	34.91	19.71	36.09	26.59	31.26	22.28
SK1G00039997	MergePeak_706	quadrant5	no	140	107	116	97	132	113	150	123	121	155	170	190	187	148	157	228	167	249	245	206	191	211	234	225	276	270	290	220	234	207	249	240	307	225	262	267	286	243	351	255	5.27	4.52	5.14	4.16	5.43	4.68
SK1G00039997	MergePeak_707	quadrant5	no	140	107	116	97	132	113	150	123	121	155	170	190	187	148	157	228	167	249	245	206	191	211	234	225	276	270	290	220	234	207	249	240	307	225	262	267	286	243	351	255	5.27	4.52	5.14	4.16	5.43	4.68
SK1G00039997	MergePeak_708	quadrant5	no	140	107	116	97	132	113	150	123	121	155	170	190	187	148	157	228	167	249	245	206	191	211	234	225	276	270	290	220	234	207	249	240	307	225	262	267	286	243	351	255	5.27	4.52	5.14	4.16	5.43	4.68
SK1G00039998	MergePeak_709	quadrant5	no	349	381	384	356	407	364	384	359	472	514	442	503	552	418	413	600	540	696	529	607	569	538	697	705	617	691	634	602	665	791	647	670	714	599	713	860	772	797	806	789	11.49	14.08	14.88	13.34	14.64	13.18
SK1G00039998	MergePeak_710	quadrant5	no	349	381	384	356	407	364	384	359	472	514	442	503	552	418	413	600	540	696	529	607	569	538	697	705	617	691	634	602	665	791	647	670	714	599	713	860	772	797	806	789	11.49	14.08	14.88	13.34	14.64	13.18
SK1G00039999	MergePeak_711	quadrant5	no	946	816	1127	1221	1279	1289	2322	1866	1600	1341	1572	2045	1871	895	1809	1790	1727	1825	1426	1283	1348	1186	944	709	942	1150	1325	856	723	666	977	1053	903	691	856	826	1038	793	1142	845	37.32	36.15	52.37	54.83	55.16	55.93
SK1G00039999	MergePeak_712	quadrant5	no	946	816	1127	1221	1279	1289	2322	1866	1600	1341	1572	2045	1871	895	1809	1790	1727	1825	1426	1283	1348	1186	944	709	942	1150	1325	856	723	666	977	1053	903	691	856	826	1038	793	1142	845	37.32	36.15	52.37	54.83	55.16	55.93
SK1G00040001	MergePeak_713	quadrant5	no	786	692	792	666	814	648	780	690	872	933	859	1133	1098	804	897	1234	1145	1360	1058	1250	1128	1163	1373	1077	966	1137	988	1274	1279	1388	1312	1205	1496	1278	1434	1538	1495	1304	1777	1348	14.99	14.82	17.79	14.47	16.97	13.59
SK1G00040002	MergePeak_714	quadrant5	no	154	142	188	203	240	218	235	199	216	231	240	213	238	177	194	290	228	320	247	201	256	221	245	181	218	222	165	229	271	244	225	219	245	237	201	284	246	226	274	255	6.08	6.29	8.74	9.12	10.35	9.46
SK1G00040003	MergePeak_715	quadrant5	no	505	467	492	533	544	493	607	539	673	600	583	723	719	716	617	868	783	826	815	808	787	896	1159	1161	1042	988	952	942	1096	1024	923	876	1131	895	984	1167	1071	1196	1101	1167	34.05	35.38	39.09	40.93	40.12	36.58
SK1G00040003	MergePeak_716	quadrant5	no	505	467	492	533	544	493	607	539	673	600	583	723	719	716	617	868	783	826	815	808	787	896	1159	1161	1042	988	952	942	1096	1024	923	876	1131	895	984	1167	1071	1196	1101	1167	34.05	35.38	39.09	40.93	40.12	36.58
SK1G00040006	MergePeak_717	quadrant2	no	595	405	589	629	603	517	766	561	1316	1305	1391	1699	1746	1458	1453	2368	1452	2439	2532	1760	2516	2128	2305	2763	2222	2756	3000	2851	2765	2548	4181	3164	3885	2413	3244	3332	3288	3568	3489	3237	20.25	15.48	23.61	24.36	22.43	19.35
SK1G00040006	MergePeak_718	quadrant2	no	595	405	589	629	603	517	766	561	1316	1305	1391	1699	1746	1458	1453	2368	1452	2439	2532	1760	2516	2128	2305	2763	2222	2756	3000	2851	2765	2548	4181	3164	3885	2413	3244	3332	3288	3568	3489	3237	20.25	15.48	23.61	24.36	22.43	19.35
SK1G00040006	MergePeak_719	quadrant2	no	595	405	589	629	603	517	766	561	1316	1305	1391	1699	1746	1458	1453	2368	1452	2439	2532	1760	2516	2128	2305	2763	2222	2756	3000	2851	2765	2548	4181	3164	3885	2413	3244	3332	3288	3568	3489	3237	20.25	15.48	23.61	24.36	22.43	19.35
SK1G00040010	MergePeak_720	quadrant5	no	580	465	610	530	544	473	574	607	639	563	599	693	626	434	449	646	659	695	502	627	527	485	575	395	416	517	350	405	551	509	591	454	550	443	488	660	578	561	585	483	18.69	16.83	23.15	19.44	19.17	16.77
SK1G00040010	MergePeak_721	quadrant5	no	580	465	610	530	544	473	574	607	639	563	599	693	626	434	449	646	659	695	502	627	527	485	575	395	416	517	350	405	551	509	591	454	550	443	488	660	578	561	585	483	18.69	16.83	23.15	19.44	19.17	16.77
SK1G00040011	MergePeak_722	quadrant5	no	56	33	38	40	35	31	38	45	36	34	40	46	52	44	43	42	40	53	56	50	30	39	52	48	49	32	34	47	40	45	61	35	68	57	51	52	61	50	58	68	7.29	4.83	5.83	5.93	4.98	4.44
SK1G00040012	MergePeak_723	quadrant5	no	259	193	257	208	275	174	252	253	282	246	202	297	243	189	234	359	309	334	252	324	258	262	346	290	290	316	295	282	336	420	378	325	379	280	412	435	394	375	449	405	5.98	5.01	6.99	5.47	6.94	4.42
SK1G00040013	MergePeak_724	quadrant5	no	927	1193	881	1171	1222	1128	1464	1189	1105	926	1106	1321	1292	857	951	1405	1169	1319	1109	1083	1088	1063	1078	756	603	639	746	757	840	757	779	804	745	860	727	823	892	623	849	764	21.78	31.47	24.38	31.31	31.38	29.14
SK1G00040013	MergePeak_725	quadrant5	no	927	1193	881	1171	1222	1128	1464	1189	1105	926	1106	1321	1292	857	951	1405	1169	1319	1109	1083	1088	1063	1078	756	603	639	746	757	840	757	779	804	745	860	727	823	892	623	849	764	21.78	31.47	24.38	31.31	31.38	29.14
SK1G00040017	MergePeak_726	quadrant5	no	7	5	7	4	4	1	3	3	10	5	4	3	8	6	14	6	8	14	9	8	8	11	12	13	3	10	3	5	5	7	3	5	15	10	4	7	9	9	22	11	0.97	0.78	1.15	0.63	0.61	0.15
SK1G00040019	MergePeak_727	quadrant8	no	3748	2219	2762	3095	2711	2286	3736	2244	1489	1324	2020	2135	1626	1338	1571	3399	1758	1529	1689	1447	1443	844	1712	902	909	1159	1481	1175	946	891	1549	1239	1294	873	1048	960	1113	781	1284	1027	163.43	108.65	141.84	153.61	129.22	109.63
SK1G00040019	MergePeak_728	quadrant8	no	3748	2219	2762	3095	2711	2286	3736	2244	1489	1324	2020	2135	1626	1338	1571	3399	1758	1529	1689	1447	1443	844	1712	902	909	1159	1481	1175	946	891	1549	1239	1294	873	1048	960	1113	781	1284	1027	163.43	108.65	141.84	153.61	129.22	109.63
SK1G00040019	MergePeak_729	quadrant8	no	3748	2219	2762	3095	2711	2286	3736	2244	1489	1324	2020	2135	1626	1338	1571	3399	1758	1529	1689	1447	1443	844	1712	902	909	1159	1481	1175	946	891	1549	1239	1294	873	1048	960	1113	781	1284	1027	163.43	108.65	141.84	153.61	129.22	109.63
SK1G00040022	MergePeak_730	quadrant2	no	848	679	553	486	554	570	464	429	438	489	630	543	805	941	618	889	1022	1745	1024	1149	1520	1771	3618	4030	3480	3267	2457	3305	3933	3518	2618	2346	4023	2342	4647	3794	2867	5736	4265	5190	20.48	18.41	15.73	13.36	14.62	15.14
SK1G00040022	MergePeak_731	quadrant2	no	848	679	553	486	554	570	464	429	438	489	630	543	805	941	618	889	1022	1745	1024	1149	1520	1771	3618	4030	3480	3267	2457	3305	3933	3518	2618	2346	4023	2342	4647	3794	2867	5736	4265	5190	20.48	18.41	15.73	13.36	14.62	15.14
SK1G00040033	MergePeak_732	quadrant5	no	239	335	207	167	172	187	89	89	215	193	203	224	331	259	211	365	311	361	357	371	254	342	227	190	288	182	122	265	417	272	276	251	246	297	179	360	153	133	235	168	10.23	16.1	10.43	8.13	8.05	8.8
SK1G00040034	MergePeak_733	quadrant5	no	444	412	336	347	388	448	426	369	443	398	438	514	527	503	433	660	544	684	596	630	566	597	810	812	824	722	747	843	877	741	866	736	869	774	847	1010	858	792	982	893	28.04	29.21	24.99	24.94	26.78	31.11
SK1G00040035	MergePeak_734	quadrant5	no	91	76	75	85	116	61	70	111	145	114	104	141	154	82	101	161	115	153	161	141	171	136	181	224	249	265	239	233	209	247	370	231	269	271	319	340	268	278	252	210	3.78	3.54	3.67	4.02	5.26	2.78
SK1G00040035	MergePeak_735	quadrant5	no	91	76	75	85	116	61	70	111	145	114	104	141	154	82	101	161	115	153	161	141	171	136	181	224	249	265	239	233	209	247	370	231	269	271	319	340	268	278	252	210	3.78	3.54	3.67	4.02	5.26	2.78
SK1G00040035	MergePeak_736	quadrant5	no	91	76	75	85	116	61	70	111	145	114	104	141	154	82	101	161	115	153	161	141	171	136	181	224	249	265	239	233	209	247	370	231	269	271	319	340	268	278	252	210	3.78	3.54	3.67	4.02	5.26	2.78
SK1G00040037	MergePeak_737	quadrant5	no	1307	1084	1213	1033	1095	1026	1135	968	994	971	1009	1088	1186	992	858	1386	1057	1251	1006	1194	1061	1275	1704	1702	1552	1525	1473	1468	1765	1847	1537	1400	1745	1442	1811	1881	1533	2005	1949	1838	32.33	30.11	35.34	29.08	29.61	27.91
SK1G00040037	MergePeak_738	quadrant5	no	1307	1084	1213	1033	1095	1026	1135	968	994	971	1009	1088	1186	992	858	1386	1057	1251	1006	1194	1061	1275	1704	1702	1552	1525	1473	1468	1765	1847	1537	1400	1745	1442	1811	1881	1533	2005	1949	1838	32.33	30.11	35.34	29.08	29.61	27.91
SK1G00040037	MergePeak_739	quadrant5	no	1307	1084	1213	1033	1095	1026	1135	968	994	971	1009	1088	1186	992	858	1386	1057	1251	1006	1194	1061	1275	1704	1702	1552	1525	1473	1468	1765	1847	1537	1400	1745	1442	1811	1881	1533	2005	1949	1838	32.33	30.11	35.34	29.08	29.61	27.91
SK1G00040038	MergePeak_740	quadrant2	no	463	328	498	366	444	432	466	620	530	501	592	710	887	752	635	817	830	1059	883	1070	906	1031	2065	2208	2912	2460	1954	1912	1985	2657	2182	1725	2054	1635	2669	2850	2461	3362	3100	2555	28.23	22.46	35.77	25.4	29.6	28.97
SK1G00040040	MergePeak_741	quadrant5	no	272	240	288	262	270	273	313	224	271	323	299	396	339	332	251	380	364	373	272	392	329	281	393	356	388	321	300	360	360	450	374	313	411	347	357	439	383	384	460	425	12.25	12.13	15.27	13.43	13.29	13.52
SK1G00040040	MergePeak_742	quadrant5	no	272	240	288	262	270	273	313	224	271	323	299	396	339	332	251	380	364	373	272	392	329	281	393	356	388	321	300	360	360	450	374	313	411	347	357	439	383	384	460	425	12.25	12.13	15.27	13.43	13.29	13.52
SK1G00040044	MergePeak_743	quadrant5	no	307	349	280	260	341	365	312	247	289	249	319	371	441	358	315	488	425	459	381	398	396	396	609	470	416	384	445	433	564	584	420	454	480	506	530	657	520	600	675	665	8.62	11.01	9.26	8.31	10.47	11.28
SK1G00040044	MergePeak_744	quadrant5	no	307	349	280	260	341	365	312	247	289	249	319	371	441	358	315	488	425	459	381	398	396	396	609	470	416	384	445	433	564	584	420	454	480	506	530	657	520	600	675	665	8.62	11.01	9.26	8.31	10.47	11.28
SK1G00040045	MergePeak_745	quadrant5	no	319	270	271	238	284	363	352	273	256	341	395	369	378	361	322	484	357	513	550	372	455	486	625	587	819	673	697	653	766	664	621	565	833	532	734	797	746	757	868	789	14.54	13.82	14.57	12.36	14.18	18.21
SK1G00040045	MergePeak_746	quadrant5	no	319	270	271	238	284	363	352	273	256	341	395	369	378	361	322	484	357	513	550	372	455	486	625	587	819	673	697	653	766	664	621	565	833	532	734	797	746	757	868	789	14.54	13.82	14.57	12.36	14.18	18.21
SK1G00040046	MergePeak_746	quadrant5	no	35	18	24	22	24	26	17	16	19	25	33	24	23	24	25	37	29	48	28	26	34	27	52	27	63	63	62	59	50	43	42	49	39	37	62	44	34	64	79	51	3.84	2.23	3.05	2.72	2.81	3.12
SK1G00040047	MergePeak_747	quadrant5	no	3569	3237	3013	3277	3284	3605	3263	2871	3249	3074	2791	3699	3822	3823	3341	4367	4343	4873	3575	3788	3489	3494	4811	3861	3363	3415	3403	3202	4161	4453	3827	3737	4190	3602	3992	4644	3988	5285	4895	4856	71.12	72.43	70.72	74.33	71.54	79.01
SK1G00040047	MergePeak_748	quadrant5	no	3569	3237	3013	3277	3284	3605	3263	2871	3249	3074	2791	3699	3822	3823	3341	4367	4343	4873	3575	3788	3489	3494	4811	3861	3363	3415	3403	3202	4161	4453	3827	3737	4190	3602	3992	4644	3988	5285	4895	4856	71.12	72.43	70.72	74.33	71.54	79.01
SK1G00040049	MergePeak_749	quadrant5	no	49	72	38	56	39	40	28	36	49	39	45	37	51	49	40	66	45	48	38	45	47	27	43	53	52	27	39	33	52	56	43	32	48	33	31	66	45	48	43	62	1.93	3.18	1.76	2.51	1.68	1.73
SK1G00040050	MergePeak_750	quadrant5	no	1598	1574	1439	1817	1648	1900	1894	1570	1436	1124	1244	1239	1378	1143	1343	1511	1199	1411	1038	1085	1270	1040	1566	1064	940	1164	1267	1123	1237	1267	884	910	1029	798	862	1140	1306	1173	1268	1214	29.98	33.16	31.8	38.8	33.8	39.2
SK1G00040050	MergePeak_751	quadrant5	no	1598	1574	1439	1817	1648	1900	1894	1570	1436	1124	1244	1239	1378	1143	1343	1511	1199	1411	1038	1085	1270	1040	1566	1064	940	1164	1267	1123	1237	1267	884	910	1029	798	862	1140	1306	1173	1268	1214	29.98	33.16	31.8	38.8	33.8	39.2
SK1G00040050	MergePeak_752	quadrant5	no	1598	1574	1439	1817	1648	1900	1894	1570	1436	1124	1244	1239	1378	1143	1343	1511	1199	1411	1038	1085	1270	1040	1566	1064	940	1164	1267	1123	1237	1267	884	910	1029	798	862	1140	1306	1173	1268	1214	29.98	33.16	31.8	38.8	33.8	39.2
SK1G00040051	MergePeak_753	quadrant8	no	106	62	106	88	64	53	46	49	33	32	47	32	16	36	26	62	31	35	6	27	18	29	33	18	8	9	5	10	19	11	18	19	17	5	10	10	13	12	11	5	10.12	6.64	11.92	9.56	6.68	5.56
SK1G00040051	MergePeak_754	quadrant8	no	106	62	106	88	64	53	46	49	33	32	47	32	16	36	26	62	31	35	6	27	18	29	33	18	8	9	5	10	19	11	18	19	17	5	10	10	13	12	11	5	10.12	6.64	11.92	9.56	6.68	5.56
SK1G00040053	MergePeak_755	quadrant5	no	1395	1656	743	1712	1884	4121	2259	2304	2050	629	1670	1326	2964	2884	2497	2376	3083	3041	2105	2179	4097	1612	2516	4098	2543	2881	2401	2064	2887	3542	1319	1561	696	2072	1369	1536	2407	3008	1734	5501	28.27	37.69	17.73	39.49	41.74	91.85
SK1G00040056	MergePeak_756	quadrant5	no	1277	1011	1390	1950	1668	1790	2834	2256	2239	2181	2296	2997	2544	2459	2431	3649	3004	3545	3729	3133	3966	2817	3138	3372	3106	5116	4673	3687	3312	3821	4540	3121	3594	2807	3323	3904	4089	4223	2959	3450	44.01	39.12	56.42	76.49	62.84	67.84
SK1G00040056	MergePeak_757	quadrant5	no	1277	1011	1390	1950	1668	1790	2834	2256	2239	2181	2296	2997	2544	2459	2431	3649	3004	3545	3729	3133	3966	2817	3138	3372	3106	5116	4673	3687	3312	3821	4540	3121	3594	2807	3323	3904	4089	4223	2959	3450	44.01	39.12	56.42	76.49	62.84	67.84
SK1G00040056	MergePeak_758	quadrant5	no	1277	1011	1390	1950	1668	1790	2834	2256	2239	2181	2296	2997	2544	2459	2431	3649	3004	3545	3729	3133	3966	2817	3138	3372	3106	5116	4673	3687	3312	3821	4540	3121	3594	2807	3323	3904	4089	4223	2959	3450	44.01	39.12	56.42	76.49	62.84	67.84
SK1G00040056	MergePeak_759	quadrant5	no	1277	1011	1390	1950	1668	1790	2834	2256	2239	2181	2296	2997	2544	2459	2431	3649	3004	3545	3729	3133	3966	2817	3138	3372	3106	5116	4673	3687	3312	3821	4540	3121	3594	2807	3323	3904	4089	4223	2959	3450	44.01	39.12	56.42	76.49	62.84	67.84
SK1G00040057	MergePeak_760	quadrant5	no	399	423	369	325	300	267	247	191	162	169	247	227	187	167	201	323	167	266	296	193	310	227	298	370	167	361	273	286	316	331	422	249	470	149	366	283	353	332	273	288	11.88	14.14	12.94	11.01	9.76	8.74
SK1G00040057	MergePeak_761	quadrant5	no	399	423	369	325	300	267	247	191	162	169	247	227	187	167	201	323	167	266	296	193	310	227	298	370	167	361	273	286	316	331	422	249	470	149	366	283	353	332	273	288	11.88	14.14	12.94	11.01	9.76	8.74
SK1G00040062	MergePeak_762	quadrant6	no	9	10	1	4	6	12	7	3	2	3	5	4	15	4	7	1	10	7	14	4	12	9	6	10	9	7	3	4	19	11	6	5	4	8	12	8	8	12	9	14	1.57	1.95	0.2	0.79	1.14	2.3
SK1G00040063	MergePeak_763	quadrant5	no	50	40	37	19	26	25	22	23	55	30	37	38	35	25	22	40	37	42	38	36	23	25	34	47	24	35	30	37	35	51	36	17	41	27	61	56	48	50	61	44	4.98	4.47	4.34	2.15	2.83	2.74
SK1G00040064	MergePeak_764	quadrant5	no	53	30	36	90	72	44	64	85	67	55	74	98	78	109	85	131	84	117	152	89	166	105	88	89	75	199	172	120	69	128	169	97	110	76	109	106	190	206	121	132	3.06	1.95	2.45	5.92	4.55	2.79
SK1G00040064	MergePeak_765	quadrant5	no	53	30	36	90	72	44	64	85	67	55	74	98	78	109	85	131	84	117	152	89	166	105	88	89	75	199	172	120	69	128	169	97	110	76	109	106	190	206	121	132	3.06	1.95	2.45	5.92	4.55	2.79
SK1G00040064	MergePeak_766	quadrant5	no	53	30	36	90	72	44	64	85	67	55	74	98	78	109	85	131	84	117	152	89	166	105	88	89	75	199	172	120	69	128	169	97	110	76	109	106	190	206	121	132	3.06	1.95	2.45	5.92	4.55	2.79
SK1G00040066	MergePeak_767	quadrant8	no	282	337	320	283	316	263	389	290	275	198	187	236	227	179	162	225	198	223	186	178	142	173	318	108	135	116	117	116	148	204	170	122	121	153	103	137	157	109	174	180	8.23	11.04	11	9.4	10.08	8.44
SK1G00040068	MergePeak_768	quadrant5	no	355	307	324	312	293	253	383	287	383	356	283	363	320	305	271	390	432	418	294	348	358	352	297	159	270	279	245	289	263	293	288	218	240	246	205	329	261	282	297	262	7.51	7.29	8.07	7.51	6.77	5.88
SK1G00040068	MergePeak_769	quadrant5	no	355	307	324	312	293	253	383	287	383	356	283	363	320	305	271	390	432	418	294	348	358	352	297	159	270	279	245	289	263	293	288	218	240	246	205	329	261	282	297	262	7.51	7.29	8.07	7.51	6.77	5.88
SK1G00040069	MergePeak_770	quadrant5	no	167	138	151	124	152	96	59	94	92	118	83	104	110	86	105	138	120	126	67	84	81	105	90	192	75	170	120	98	92	81	136	102	113	71	116	117	135	289	116	170	16.56	11.3	34.32	10.72	31.52	16.92
SK1G00040069	MergePeak_771	quadrant5	no	167	138	151	124	152	96	59	94	92	118	83	104	110	86	105	138	120	126	67	84	81	105	90	192	75	170	120	98	92	81	136	102	113	71	116	117	135	289	116	170	16.56	11.3	34.32	10.72	31.52	16.92
SK1G00040071	MergePeak_772	quadrant5	no	1471	1401	1165	1210	1411	1404	1289	1304	1128	989	992	1146	1400	1396	1218	1384	1426	1351	1036	1204	1237	1225	1225	1282	727	965	846	987	1275	1279	932	895	992	1003	971	1243	1039	1220	1140	1240	50.4	53.9	46.99	47.19	52.82	52.87
SK1G00040071	MergePeak_773	quadrant5	no	1471	1401	1165	1210	1411	1404	1289	1304	1128	989	992	1146	1400	1396	1218	1384	1426	1351	1036	1204	1237	1225	1225	1282	727	965	846	987	1275	1279	932	895	992	1003	971	1243	1039	1220	1140	1240	50.4	53.9	46.99	47.19	52.82	52.87
SK1G00040071	MergePeak_774	quadrant5	no	1471	1401	1165	1210	1411	1404	1289	1304	1128	989	992	1146	1400	1396	1218	1384	1426	1351	1036	1204	1237	1225	1225	1282	727	965	846	987	1275	1279	932	895	992	1003	971	1243	1039	1220	1140	1240	50.4	53.9	46.99	47.19	52.82	52.87
SK1G00040072	MergePeak_775	quadrant5	no	0	1	0	1	4	0	0	0	0	0	0	2	0	1	0	1	0	0	0	0	1	4	0	1	0	1	1	0	4	4	1	2	1	4	0	1	1	6	3	0	0	0.27	0	0.27	1.04	0
SK1G00040073	MergePeak_776	quadrant5	no	959	812	897	948	1000	1041	1178	1025	1116	1111	1024	1240	1352	1279	1154	1538	1303	1630	1300	1371	1342	1281	1539	1424	1280	1346	1390	1394	1575	1691	1618	1433	1653	1530	1540	1789	1704	1606	2022	1698	27.92	26.55	30.76	31.42	31.83	33.34
SK1G00040074	MergePeak_777	quadrant5	no	352	350	338	289	318	279	324	236	255	297	203	281	255	217	191	255	269	236	134	175	181	209	168	187	168	238	207	151	191	234	188	206	242	146	265	252	167	217	189	221	10.93	12.2	12.36	10.21	10.79	9.53
SK1G00040074	MergePeak_778	quadrant5	no	352	350	338	289	318	279	324	236	255	297	203	281	255	217	191	255	269	236	134	175	181	209	168	187	168	238	207	151	191	234	188	206	242	146	265	252	167	217	189	221	10.93	12.2	12.36	10.21	10.79	9.53
SK1G00040074	MergePeak_779	quadrant5	no	352	350	338	289	318	279	324	236	255	297	203	281	255	217	191	255	269	236	134	175	181	209	168	187	168	238	207	151	191	234	188	206	242	146	265	252	167	217	189	221	10.93	12.2	12.36	10.21	10.79	9.53
SK1G00040074	MergePeak_780	quadrant4	no	352	350	338	289	318	279	324	236	255	297	203	281	255	217	191	255	269	236	134	175	181	209	168	187	168	238	207	151	191	234	188	206	242	146	265	252	167	217	189	221	10.93	12.2	12.36	10.21	10.79	9.53
SK1G00040075	MergePeak_781	quadrant5	no	59	103	68	65	64	57	75	54	50	57	40	48	51	52	48	47	72	85	53	54	45	70	49	30	52	48	57	46	76	48	39	40	47	35	49	55	56	65	100	55	1.5	2.95	2.04	1.89	1.78	1.6
SK1G00040078	MergePeak_782	quadrant5	no	637	736	660	593	825	827	812	718	982	1045	828	1107	1133	734	1190	1297	1043	1023	685	803	1014	968	756	833	668	1246	1363	858	853	843	533	595	707	652	761	726	1967	627	1945	1197	23.09	29.96	28.18	24.47	32.69	32.97
SK1G00040078	MergePeak_783	quadrant5	no	637	736	660	593	825	827	812	718	982	1045	828	1107	1133	734	1190	1297	1043	1023	685	803	1014	968	756	833	668	1246	1363	858	853	843	533	595	707	652	761	726	1967	627	1945	1197	23.09	29.96	28.18	24.47	32.69	32.97
SK1G00040080	MergePeak_784	quadrant5	no	219	197	184	132	128	97	101	89	67	62	128	77	99	117	71	147	101	105	88	62	94	48	139	107	63	124	144	105	91	123	78	126	147	35	104	98	119	130	181	120	9.61	9.71	9.51	6.59	6.14	4.68
SK1G00040080	MergePeak_785	quadrant5	no	219	197	184	132	128	97	101	89	67	62	128	77	99	117	71	147	101	105	88	62	94	48	139	107	63	124	144	105	91	123	78	126	147	35	104	98	119	130	181	120	9.61	9.71	9.51	6.59	6.14	4.68
SK1G00040082	MergePeak_786	quadrant5	no	911	739	885	865	877	805	995	852	917	888	816	1071	1077	967	918	1300	1144	1254	1046	1223	1119	1106	1469	1136	852	1016	852	1214	1370	1250	1112	1091	1275	1145	1133	1615	1157	1228	1426	1248	14.31	13.03	16.37	15.46	15.06	13.91
SK1G00040082	MergePeak_787	quadrant5	no	911	739	885	865	877	805	995	852	917	888	816	1071	1077	967	918	1300	1144	1254	1046	1223	1119	1106	1469	1136	852	1016	852	1214	1370	1250	1112	1091	1275	1145	1133	1615	1157	1228	1426	1248	14.31	13.03	16.37	15.46	15.06	13.91
SK1G00040082	MergePeak_788	quadrant5	no	911	739	885	865	877	805	995	852	917	888	816	1071	1077	967	918	1300	1144	1254	1046	1223	1119	1106	1469	1136	852	1016	852	1214	1370	1250	1112	1091	1275	1145	1133	1615	1157	1228	1426	1248	14.31	13.03	16.37	15.46	15.06	13.91
SK1G00040082	MergePeak_789	quadrant5	no	911	739	885	865	877	805	995	852	917	888	816	1071	1077	967	918	1300	1144	1254	1046	1223	1119	1106	1469	1136	852	1016	852	1214	1370	1250	1112	1091	1275	1145	1133	1615	1157	1228	1426	1248	14.31	13.03	16.37	15.46	15.06	13.91
SK1G00040082	MergePeak_790	quadrant5	no	911	739	885	865	877	805	995	852	917	888	816	1071	1077	967	918	1300	1144	1254	1046	1223	1119	1106	1469	1136	852	1016	852	1214	1370	1250	1112	1091	1275	1145	1133	1615	1157	1228	1426	1248	14.31	13.03	16.37	15.46	15.06	13.91
SK1G00040085	MergePeak_791	quadrant5	no	46	88	79	73	75	84	85	45	77	58	53	62	78	59	94	99	80	87	78	69	86	74	96	113	81	104	94	89	102	112	78	85	57	57	85	121	106	115	100	103	3.34	7.18	6.76	6.04	5.96	6.71
SK1G00040094	MergePeak_792	quadrant5	no	89	73	70	91	69	95	117	112	83	93	110	131	126	83	89	153	95	183	154	131	130	118	191	141	167	164	166	147	176	157	166	182	188	158	160	203	188	132	176	212	7.78	7.16	7.2	9.05	6.59	9.13
SK1G00040095	MergePeak_793	quadrant5	no	365	268	400	328	491	350	468	408	395	328	365	387	458	222	340	448	444	540	358	461	375	432	512	343	344	446	504	514	481	660	547	573	528	455	631	464	587	491	644	461	9.71	8.01	12.54	9.94	14.28	10.24
SK1G00040095	MergePeak_794	quadrant5	no	365	268	400	328	491	350	468	408	395	328	365	387	458	222	340	448	444	540	358	461	375	432	512	343	344	446	504	514	481	660	547	573	528	455	631	464	587	491	644	461	9.71	8.01	12.54	9.94	14.28	10.24
SK1G00040095	MergePeak_795	quadrant5	no	365	268	400	328	491	350	468	408	395	328	365	387	458	222	340	448	444	540	358	461	375	432	512	343	344	446	504	514	481	660	547	573	528	455	631	464	587	491	644	461	9.71	8.01	12.54	9.94	14.28	10.24
SK1G00040095	MergePeak_796	quadrant5	no	365	268	400	328	491	350	468	408	395	328	365	387	458	222	340	448	444	540	358	461	375	432	512	343	344	446	504	514	481	660	547	573	528	455	631	464	587	491	644	461	9.71	8.01	12.54	9.94	14.28	10.24
SK1G00040095	MergePeak_797	quadrant5	no	365	268	400	328	491	350	468	408	395	328	365	387	458	222	340	448	444	540	358	461	375	432	512	343	344	446	504	514	481	660	547	573	528	455	631	464	587	491	644	461	9.71	8.01	12.54	9.94	14.28	10.24
SK1G00040098	MergePeak_798	quadrant5	no	196	153	230	156	196	172	216	158	221	230	149	223	175	162	190	239	150	199	132	204	153	187	215	181	161	194	200	188	205	196	217	185	244	158	154	255	203	179	222	193	4.23	3.71	5.84	3.83	4.62	4.08
SK1G00040101	MergePeak_799	quadrant5	no	6898	5482	7229	7315	6697	5746	8665	6848	6972	6315	6126	9898	5987	4610	6147	8951	6178	7151	6020	6274	5986	4877	4375	3195	3289	3372	3728	4009	3706	4103	5552	5734	4717	3648	3513	4835	6339	2397	5217	4072	174.02	155.29	214.79	210.05	184.69	159.43
SK1G00040102	MergePeak_800	quadrant5	no	872	890	776	764	812	848	695	638	765	696	613	780	839	1010	841	1162	1115	1130	694	950	926	840	1085	944	702	654	634	702	943	972	913	838	847	706	801	1042	1043	857	1007	1023	17.5	20.05	18.34	17.45	17.81	18.71
SK1G00040103	MergePeak_801	quadrant8	no	721	442	595	652	706	551	814	500	241	264	327	356	338	340	284	536	404	369	259	292	205	196	231	165	105	195	188	144	114	155	136	183	266	103	109	194	192	143	256	148	95.12	65.48	92.45	97.91	101.81	79.94
SK1G00040104	MergePeak_802	quadrant5	no	807	724	783	842	823	729	776	757	909	852	896	1026	984	896	1006	1222	1202	1512	1409	1381	1441	1335	2531	2090	2622	2227	1965	1837	2188	2417	2130	1890	2008	1977	1757	2461	1996	1924	2191	2198	15.7	15.82	17.95	18.65	17.51	15.6
SK1G00040104	MergePeak_803	quadrant5	no	807	724	783	842	823	729	776	757	909	852	896	1026	984	896	1006	1222	1202	1512	1409	1381	1441	1335	2531	2090	2622	2227	1965	1837	2188	2417	2130	1890	2008	1977	1757	2461	1996	1924	2191	2198	15.7	15.82	17.95	18.65	17.51	15.6
SK1G00040104	MergePeak_804	quadrant5	no	807	724	783	842	823	729	776	757	909	852	896	1026	984	896	1006	1222	1202	1512	1409	1381	1441	1335	2531	2090	2622	2227	1965	1837	2188	2417	2130	1890	2008	1977	1757	2461	1996	1924	2191	2198	15.7	15.82	17.95	18.65	17.51	15.6
SK1G00040108	MergePeak_805	quadrant4	no	409	411	339	461	399	429	484	367	440	411	342	534	454	402	428	585	555	594	503	414	419	420	472	381	385	378	330	384	401	463	426	407	410	363	365	487	467	488	500	556	14.99	16.92	14.64	19.24	15.99	17.3
SK1G00040108	MergePeak_806	quadrant5	no	409	411	339	461	399	429	484	367	440	411	342	534	454	402	428	585	555	594	503	414	419	420	472	381	385	378	330	384	401	463	426	407	410	363	365	487	467	488	500	556	14.99	16.92	14.64	19.24	15.99	17.3
SK1G00040110	MergePeak_807	quadrant5	no	64	56	53	54	48	45	56	52	68	45	53	61	94	60	71	80	53	58	88	63	49	37	81	141	82	94	93	90	96	137	121	66	94	87	114	89	93	164	112	120	3.12	3.06	3.04	2.99	2.56	2.41
SK1G00040111	MergePeak_808	quadrant5	no	16	13	17	14	12	13	11	21	14	12	8	16	15	24	18	24	10	30	25	12	21	23	25	21	32	34	13	19	22	19	17	23	30	18	34	23	34	30	30	33	2.76	2.52	3.46	2.75	2.26	2.47
SK1G00040114	MergePeak_809	quadrant5	no	521	492	440	450	407	337	390	336	523	424	249	332	351	343	315	371	312	443	257	371	350	391	393	369	302	642	583	494	398	581	572	336	463	299	613	557	359	631	449	481	14.52	15.39	14.44	14.27	12.4	10.33
SK1G00040114	MergePeak_810	quadrant5	no	521	492	440	450	407	337	390	336	523	424	249	332	351	343	315	371	312	443	257	371	350	391	393	369	302	642	583	494	398	581	572	336	463	299	613	557	359	631	449	481	14.52	15.39	14.44	14.27	12.4	10.33
SK1G00040116	MergePeak_811	quadrant5	no	950	879	890	1028	933	1027	1067	904	1234	1063	1370	1539	1411	1217	1302	1721	1567	1958	2225	1536	2404	1754	2373	2854	2693	2672	2792	2355	2199	2522	2921	2028	2450	1998	2255	2803	2533	3164	2422	2653	55.85	58.02	61.62	68.79	59.96	66.4
SK1G00040116	MergePeak_812	quadrant5	no	950	879	890	1028	933	1027	1067	904	1234	1063	1370	1539	1411	1217	1302	1721	1567	1958	2225	1536	2404	1754	2373	2854	2693	2672	2792	2355	2199	2522	2921	2028	2450	1998	2255	2803	2533	3164	2422	2653	55.85	58.02	61.62	68.79	59.96	66.4
SK1G00040117	MergePeak_813	quadrant5	no	105	106	92	122	116	132	119	105	106	74	144	116	175	163	115	140	155	161	154	137	164	196	208	206	145	196	158	110	204	157	216	126	180	157	160	205	225	253	208	276	15.53	17.61	16.03	20.54	18.76	21.48
SK1G00040119	MergePeak_814	quadrant5	no	3	7	2	1	5	5	5	2	2	1	1	7	2	6	5	8	9	12	3	3	3	13	6	1	6	6	14	10	5	7	7	7	3	3	24	9	3	20	18	7	0.55	1.45	0.44	0.21	1.01	1.02
SK1G00040123	MergePeak_815	quadrant5	no	69	51	57	53	67	42	61	62	53	77	60	93	77	72	48	59	42	76	70	65	45	61	66	75	55	72	67	70	93	87	59	67	65	76	64	82	58	103	100	66	5.29	4.39	5.15	4.63	5.62	3.54
SK1G00040124	MergePeak_816	quadrant5	no	30	40	23	17	16	22	29	19	32	13	8	19	18	6	10	20	16	31	13	12	34	20	14	25	8	11	19	23	25	18	18	33	14	14	16	17	26	22	38	38	2.85	4.27	2.57	1.84	1.66	2.3
SK1G00040125	MergePeak_817	quadrant5	no	37	45	36	45	33	31	35	41	35	39	28	39	28	29	37	43	38	56	25	43	25	35	34	17	36	27	27	38	36	25	35	20	34	30	46	19	41	23	38	28	2.13	2.91	2.44	2.95	2.08	1.96
SK1G00040130	MergePeak_818	quadrant5	no	5793	4520	5138	5026	5711	5068	6235	5792	5387	5445	5223	6642	6033	4885	5402	7813	6845	7305	6042	7212	5715	6566	6460	5393	4810	5263	5097	5567	6834	6116	6365	6117	6680	6160	5914	7301	6635	5992	6912	6473	112.28	98.37	117.28	110.88	121	108.03
SK1G00040130	MergePeak_819	quadrant5	no	5793	4520	5138	5026	5711	5068	6235	5792	5387	5445	5223	6642	6033	4885	5402	7813	6845	7305	6042	7212	5715	6566	6460	5393	4810	5263	5097	5567	6834	6116	6365	6117	6680	6160	5914	7301	6635	5992	6912	6473	112.28	98.37	117.28	110.88	121	108.03
SK1G00040130	MergePeak_820	quadrant5	no	5793	4520	5138	5026	5711	5068	6235	5792	5387	5445	5223	6642	6033	4885	5402	7813	6845	7305	6042	7212	5715	6566	6460	5393	4810	5263	5097	5567	6834	6116	6365	6117	6680	6160	5914	7301	6635	5992	6912	6473	112.28	98.37	117.28	110.88	121	108.03
SK1G00040130	MergePeak_821	quadrant5	no	5793	4520	5138	5026	5711	5068	6235	5792	5387	5445	5223	6642	6033	4885	5402	7813	6845	7305	6042	7212	5715	6566	6460	5393	4810	5263	5097	5567	6834	6116	6365	6117	6680	6160	5914	7301	6635	5992	6912	6473	112.28	98.37	117.28	110.88	121	108.03
SK1G00040130	MergePeak_822	quadrant5	no	5793	4520	5138	5026	5711	5068	6235	5792	5387	5445	5223	6642	6033	4885	5402	7813	6845	7305	6042	7212	5715	6566	6460	5393	4810	5263	5097	5567	6834	6116	6365	6117	6680	6160	5914	7301	6635	5992	6912	6473	112.28	98.37	117.28	110.88	121	108.03
SK1G00040133	MergePeak_823	quadrant5	no	570	498	535	515	586	632	625	509	630	536	602	697	801	665	656	797	869	905	711	812	715	735	859	850	809	875	736	798	832	827	843	828	876	727	837	985	914	931	973	966	18.11	17.76	20.02	18.62	20.35	22.08
SK1G00040133	MergePeak_824	quadrant5	no	570	498	535	515	586	632	625	509	630	536	602	697	801	665	656	797	869	905	711	812	715	735	859	850	809	875	736	798	832	827	843	828	876	727	837	985	914	931	973	966	18.11	17.76	20.02	18.62	20.35	22.08
SK1G00040134	MergePeak_825	quadrant5	no	551	781	504	838	657	805	665	561	609	428	561	612	885	685	752	826	796	850	766	677	833	711	951	1000	805	1213	1082	900	991	970	959	839	955	656	1079	996	1063	1260	957	1054	14.05	22.36	15.13	24.32	18.31	22.57
SK1G00040134	MergePeak_826	quadrant5	no	551	781	504	838	657	805	665	561	609	428	561	612	885	685	752	826	796	850	766	677	833	711	951	1000	805	1213	1082	900	991	970	959	839	955	656	1079	996	1063	1260	957	1054	14.05	22.36	15.13	24.32	18.31	22.57
SK1G00040134	MergePeak_827	quadrant5	no	551	781	504	838	657	805	665	561	609	428	561	612	885	685	752	826	796	850	766	677	833	711	951	1000	805	1213	1082	900	991	970	959	839	955	656	1079	996	1063	1260	957	1054	14.05	22.36	15.13	24.32	18.31	22.57
SK1G00040137	MergePeak_828	quadrant5	no	1516	1462	1638	1191	1324	1013	994	1157	675	718	865	929	871	530	726	1088	1207	842	691	911	510	746	1766	880	789	933	750	753	670	899	435	708	1050	570	670	1041	1125	648	1671	988	56.37	61.05	71.74	50.41	53.82	41.43
SK1G00040140	MergePeak_829	quadrant5	no	1509	1400	1542	1566	1562	1532	1874	1625	2088	2153	2041	2287	2691	2470	2210	3029	2175	3581	2803	3099	2920	2800	3593	3607	2983	3975	3797	3437	3549	3937	4021	3418	4216	3428	4171	4380	4601	4165	4263	3891	69.45	72.36	83.59	82.04	78.59	77.55
SK1G00040140	MergePeak_830	quadrant5	no	1509	1400	1542	1566	1562	1532	1874	1625	2088	2153	2041	2287	2691	2470	2210	3029	2175	3581	2803	3099	2920	2800	3593	3607	2983	3975	3797	3437	3549	3937	4021	3418	4216	3428	4171	4380	4601	4165	4263	3891	69.45	72.36	83.59	82.04	78.59	77.55
SK1G00040144	MergePeak_831	quadrant5	no	724	629	622	541	637	550	644	496	534	617	507	683	675	509	540	692	708	769	641	724	611	602	838	809	861	881	840	826	925	958	845	753	1068	731	926	915	988	1017	1123	986	11.9	11.61	12.04	10.12	11.44	9.94
SK1G00040144	MergePeak_832	quadrant5	no	724	629	622	541	637	550	644	496	534	617	507	683	675	509	540	692	708	769	641	724	611	602	838	809	861	881	840	826	925	958	845	753	1068	731	926	915	988	1017	1123	986	11.9	11.61	12.04	10.12	11.44	9.94
SK1G00040144	MergePeak_833	quadrant4	no	724	629	622	541	637	550	644	496	534	617	507	683	675	509	540	692	708	769	641	724	611	602	838	809	861	881	840	826	925	958	845	753	1068	731	926	915	988	1017	1123	986	11.9	11.61	12.04	10.12	11.44	9.94
SK1G00040145	MergePeak_834	quadrant5	no	14	12	6	7	6	8	3	6	2	12	6	3	8	6	5	10	15	10	5	3	5	6	10	9	11	8	5	7	18	3	5	3	12	12	15	16	7	16	10	4	2.79	2.68	1.41	1.59	1.31	1.8
SK1G00040147	MergePeak_835	quadrant5	no	40	30	28	40	24	41	44	26	32	34	30	23	29	30	45	58	53	33	33	40	43	41	48	28	36	23	33	32	33	38	51	28	50	23	38	63	56	47	53	58	1.82	1.53	1.5	2.07	1.19	2.05
SK1G00040148	MergePeak_836	quadrant5	no	800	761	732	615	777	664	815	686	792	741	691	967	948	804	749	961	881	1028	775	971	796	883	1129	1000	1017	1022	976	1014	1085	1101	970	992	1040	1072	1070	1326	1160	1201	1311	1238	30.37	32.45	32.74	26.61	32.26	27.74
SK1G00040148	MergePeak_837	quadrant5	no	800	761	732	615	777	664	815	686	792	741	691	967	948	804	749	961	881	1028	775	971	796	883	1129	1000	1017	1022	976	1014	1085	1101	970	992	1040	1072	1070	1326	1160	1201	1311	1238	30.37	32.45	32.74	26.61	32.26	27.74
SK1G00040149	MergePeak_837	quadrant5	no	1683	1544	1357	1341	1487	1681	1225	1201	1330	1414	1085	1265	1601	1064	1048	1600	1584	1866	1084	1059	1003	944	1005	954	847	1116	917	959	1212	1057	1025	944	1048	721	1212	1039	928	1543	1083	1300	37.33	38.45	35.44	33.84	36.05	41
SK1G00040149	MergePeak_838	quadrant5	no	1683	1544	1357	1341	1487	1681	1225	1201	1330	1414	1085	1265	1601	1064	1048	1600	1584	1866	1084	1059	1003	944	1005	954	847	1116	917	959	1212	1057	1025	944	1048	721	1212	1039	928	1543	1083	1300	37.33	38.45	35.44	33.84	36.05	41
SK1G00040149	MergePeak_839	quadrant5	no	1683	1544	1357	1341	1487	1681	1225	1201	1330	1414	1085	1265	1601	1064	1048	1600	1584	1866	1084	1059	1003	944	1005	954	847	1116	917	959	1212	1057	1025	944	1048	721	1212	1039	928	1543	1083	1300	37.33	38.45	35.44	33.84	36.05	41
SK1G00040151	MergePeak_840	quadrant5	no	299	466	236	299	399	320	348	344	317	303	350	322	441	308	423	420	383	480	315	378	402	288	538	435	368	441	523	375	410	479	404	395	463	392	444	477	520	529	502	499	5.71	10	5.31	6.5	8.33	6.72
SK1G00040155	MergePeak_841	quadrant5	no	233	171	256	225	219	179	225	188	252	246	194	275	318	260	243	335	272	356	242	271	296	322	450	435	357	414	383	364	421	509	432	300	516	308	438	472	494	588	597	540	10.63	8.76	13.76	11.68	10.92	8.98
SK1G00040155	MergePeak_842	quadrant5	no	233	171	256	225	219	179	225	188	252	246	194	275	318	260	243	335	272	356	242	271	296	322	450	435	357	414	383	364	421	509	432	300	516	308	438	472	494	588	597	540	10.63	8.76	13.76	11.68	10.92	8.98
SK1G00040156	MergePeak_843	quadrant5	no	1076	873	898	739	860	739	843	855	886	800	765	958	1046	1009	851	1241	1140	1314	1006	1029	992	1150	1672	1581	1400	1776	1581	1219	1560	1509	1614	1308	1799	1178	1742	1774	1635	1991	1847	1987	51.67	47.07	50.79	40.39	45.14	39.03
SK1G00040156	MergePeak_844	quadrant5	no	1076	873	898	739	860	739	843	855	886	800	765	958	1046	1009	851	1241	1140	1314	1006	1029	992	1150	1672	1581	1400	1776	1581	1219	1560	1509	1614	1308	1799	1178	1742	1774	1635	1991	1847	1987	51.67	47.07	50.79	40.39	45.14	39.03
SK1G00040156	MergePeak_845	quadrant5	no	1076	873	898	739	860	739	843	855	886	800	765	958	1046	1009	851	1241	1140	1314	1006	1029	992	1150	1672	1581	1400	1776	1581	1219	1560	1509	1614	1308	1799	1178	1742	1774	1635	1991	1847	1987	51.67	47.07	50.79	40.39	45.14	39.03
SK1G00040160	MergePeak_846	quadrant5	no	1106	1002	1296	1349	1338	1218	1698	1437	1799	1840	1618	2155	2093	1844	1796	2526	2063	2573	2257	2217	2329	1994	2975	2980	2771	3448	3122	2515	2722	3216	3138	2698	3421	2667	3399	3623	3761	3752	3694	3320	21.62	22	29.84	30.02	28.6	26.19
SK1G00040160	MergePeak_847	quadrant5	no	1106	1002	1296	1349	1338	1218	1698	1437	1799	1840	1618	2155	2093	1844	1796	2526	2063	2573	2257	2217	2329	1994	2975	2980	2771	3448	3122	2515	2722	3216	3138	2698	3421	2667	3399	3623	3761	3752	3694	3320	21.62	22	29.84	30.02	28.6	26.19
SK1G00040162	MergePeak_848	quadrant4	no	26	31	44	36	41	29	36	28	32	17	30	28	59	38	37	48	42	42	52	43	42	55	95	80	74	81	100	89	89	134	60	67	74	41	109	85	69	141	99	73	0.82	1.22	1.82	1.4	1.54	1.02
SK1G00040162	MergePeak_849	quadrant5	no	26	31	44	36	41	29	36	28	32	17	30	28	59	38	37	48	42	42	52	43	42	55	95	80	74	81	100	89	89	134	60	67	74	41	109	85	69	141	99	73	0.82	1.22	1.82	1.4	1.54	1.02
SK1G00040162	MergePeak_850	quadrant5	no	26	31	44	36	41	29	36	28	32	17	30	28	59	38	37	48	42	42	52	43	42	55	95	80	74	81	100	89	89	134	60	67	74	41	109	85	69	141	99	73	0.82	1.22	1.82	1.4	1.54	1.02
SK1G00040164	MergePeak_851	quadrant5	no	1114	952	903	845	834	780	739	680	857	788	724	757	900	709	733	1014	891	899	703	795	670	790	1139	1132	1003	890	858	779	1000	1019	907	874	1080	858	1016	1073	970	1185	1304	1160	35.5	34.06	33.89	30.65	29.05	27.33
SK1G00040164	MergePeak_852	quadrant5	no	1114	952	903	845	834	780	739	680	857	788	724	757	900	709	733	1014	891	899	703	795	670	790	1139	1132	1003	890	858	779	1000	1019	907	874	1080	858	1016	1073	970	1185	1304	1160	35.5	34.06	33.89	30.65	29.05	27.33
SK1G00040165	MergePeak_853	quadrant5	no	854	691	863	725	829	718	826	865	826	767	812	1006	1094	939	895	1169	1021	1236	913	1163	980	1066	1521	1614	1570	1820	1825	1404	1436	1606	1606	1300	1573	1152	1796	1792	1696	1991	1888	1739	26.38	23.69	31.17	25.41	27.49	24.25
SK1G00040165	MergePeak_854	quadrant5	no	854	691	863	725	829	718	826	865	826	767	812	1006	1094	939	895	1169	1021	1236	913	1163	980	1066	1521	1614	1570	1820	1825	1404	1436	1606	1606	1300	1573	1152	1796	1792	1696	1991	1888	1739	26.38	23.69	31.17	25.41	27.49	24.25
SK1G00040166	MergePeak_855	quadrant5	no	132	152	143	226	175	202	340	226	150	187	221	254	216	129	272	306	265	256	239	218	288	190	193	136	170	152	158	134	104	115	161	113	155	120	74	169	161	104	85	125	3.27	4.23	4.17	6.37	4.74	5.5
SK1G00040168	MergePeak_856	quadrant5	no	1745	1213	1372	1399	1366	1260	1496	1384	1357	1334	1135	1540	1175	1173	1194	1584	1394	1568	1198	1280	1229	1237	1448	1093	950	993	1050	980	1263	1177	1129	1124	1291	1180	1245	1441	1318	1217	1488	1323	72.53	56.61	67.16	66.18	62.06	57.6
SK1G00040168	MergePeak_857	quadrant5	no	1745	1213	1372	1399	1366	1260	1496	1384	1357	1334	1135	1540	1175	1173	1194	1584	1394	1568	1198	1280	1229	1237	1448	1093	950	993	1050	980	1263	1177	1129	1124	1291	1180	1245	1441	1318	1217	1488	1323	72.53	56.61	67.16	66.18	62.06	57.6
SK1G00040168	MergePeak_858	quadrant5	no	1745	1213	1372	1399	1366	1260	1496	1384	1357	1334	1135	1540	1175	1173	1194	1584	1394	1568	1198	1280	1229	1237	1448	1093	950	993	1050	980	1263	1177	1129	1124	1291	1180	1245	1441	1318	1217	1488	1323	72.53	56.61	67.16	66.18	62.06	57.6
SK1G00040169	MergePeak_859	quadrant5	no	349	259	286	321	396	321	462	309	374	285	309	354	386	353	325	456	404	431	358	428	363	265	436	392	326	413	307	253	362	379	400	366	445	341	363	419	426	428	443	434	23.24	19.37	22.43	24.33	28.83	23.51
SK1G00040170	MergePeak_860	quadrant5	no	182	155	133	148	168	141	147	177	182	250	218	272	203	225	221	327	318	387	306	260	262	253	385	293	284	307	262	278	395	368	360	365	470	293	488	355	463	430	505	462	5.66	5.41	4.87	5.24	5.71	4.82
SK1G00040171	MergePeak_861	quadrant5	no	423	463	623	877	789	868	913	797	796	710	554	751	642	578	694	932	782	678	667	692	698	540	588	260	383	347	363	370	424	429	422	404	468	396	315	444	575	329	406	320	9.48	11.65	16.44	22.37	19.33	21.39
SK1G00040173	MergePeak_862	quadrant5	no	158	180	109	204	121	163	188	125	169	124	163	152	203	175	136	155	187	210	177	140	202	193	267	310	261	278	268	222	251	194	266	221	368	202	240	278	387	286	354	326	5.93	7.58	4.82	8.71	4.96	6.73
SK1G00040173	MergePeak_863	quadrant5	no	158	180	109	204	121	163	188	125	169	124	163	152	203	175	136	155	187	210	177	140	202	193	267	310	261	278	268	222	251	194	266	221	368	202	240	278	387	286	354	326	5.93	7.58	4.82	8.71	4.96	6.73
SK1G00040174	MergePeak_864	quadrant5	no	238	214	182	222	228	209	288	216	225	255	252	302	303	200	243	358	324	315	234	350	294	303	367	409	358	405	360	333	405	403	380	330	422	355	375	417	430	407	479	447	15.87	16.02	14.29	16.85	16.62	15.32
SK1G00040176	MergePeak_865	quadrant5	no	332	286	321	316	283	301	326	264	248	260	249	279	307	288	348	368	344	367	282	340	296	294	383	320	331	284	305	310	392	346	303	358	375	295	352	396	311	396	403	415	17.72	17.14	20.18	19.2	16.51	17.67
SK1G00040176	MergePeak_866	quadrant5	no	332	286	321	316	283	301	326	264	248	260	249	279	307	288	348	368	344	367	282	340	296	294	383	320	331	284	305	310	392	346	303	358	375	295	352	396	311	396	403	415	17.72	17.14	20.18	19.2	16.51	17.67
SK1G00040176	MergePeak_867	quadrant5	no	332	286	321	316	283	301	326	264	248	260	249	279	307	288	348	368	344	367	282	340	296	294	383	320	331	284	305	310	392	346	303	358	375	295	352	396	311	396	403	415	17.72	17.14	20.18	19.2	16.51	17.67
SK1G00040179	MergePeak_868	quadrant5	no	323	269	232	333	223	245	332	289	213	254	278	279	272	270	222	381	288	325	314	249	328	268	266	288	250	420	290	256	275	264	301	280	225	188	226	243	267	312	256	223	10.84	10.17	9.2	12.76	8.21	9.07
SK1G00040179	MergePeak_869	quadrant5	no	323	269	232	333	223	245	332	289	213	254	278	279	272	270	222	381	288	325	314	249	328	268	266	288	250	420	290	256	275	264	301	280	225	188	226	243	267	312	256	223	10.84	10.17	9.2	12.76	8.21	9.07
SK1G00040179	MergePeak_870	quadrant5	no	323	269	232	333	223	245	332	289	213	254	278	279	272	270	222	381	288	325	314	249	328	268	266	288	250	420	290	256	275	264	301	280	225	188	226	243	267	312	256	223	10.84	10.17	9.2	12.76	8.21	9.07
SK1G00040180	MergePeak_871	quadrant5	no	421	430	364	466	466	580	586	483	448	412	442	525	560	425	538	600	651	665	567	510	601	575	747	621	515	577	534	472	549	546	499	421	601	526	524	580	549	525	566	798	33.16	38.03	33.76	41.77	40.12	50.24
SK1G00040180	MergePeak_872	quadrant5	no	421	430	364	466	466	580	586	483	448	412	442	525	560	425	538	600	651	665	567	510	601	575	747	621	515	577	534	472	549	546	499	421	601	526	524	580	549	525	566	798	33.16	38.03	33.76	41.77	40.12	50.24
SK1G00040183	MergePeak_873	quadrant5	no	805	640	853	999	1086	1065	1641	1297	926	878	1079	1223	1301	891	1109	1636	1309	1341	1367	1158	1244	1147	1270	1138	1495	1947	1940	1264	1246	1089	1070	1282	1585	829	1265	1257	1493	1583	1797	1494	14.23	12.7	17.76	20.1	20.99	20.71
SK1G00040183	MergePeak_874	quadrant5	no	805	640	853	999	1086	1065	1641	1297	926	878	1079	1223	1301	891	1109	1636	1309	1341	1367	1158	1244	1147	1270	1138	1495	1947	1940	1264	1246	1089	1070	1282	1585	829	1265	1257	1493	1583	1797	1494	14.23	12.7	17.76	20.1	20.99	20.71
SK1G00040183	MergePeak_875	quadrant5	no	805	640	853	999	1086	1065	1641	1297	926	878	1079	1223	1301	891	1109	1636	1309	1341	1367	1158	1244	1147	1270	1138	1495	1947	1940	1264	1246	1089	1070	1282	1585	829	1265	1257	1493	1583	1797	1494	14.23	12.7	17.76	20.1	20.99	20.71
SK1G00040183	MergePeak_876	quadrant5	no	805	640	853	999	1086	1065	1641	1297	926	878	1079	1223	1301	891	1109	1636	1309	1341	1367	1158	1244	1147	1270	1138	1495	1947	1940	1264	1246	1089	1070	1282	1585	829	1265	1257	1493	1583	1797	1494	14.23	12.7	17.76	20.1	20.99	20.71
SK1G00040184	MergePeak_877	quadrant4	no	148	99	136	191	166	203	315	291	210	206	393	236	322	196	316	342	342	426	404	308	398	384	255	262	246	437	366	395	266	231	294	259	396	208	257	259	329	319	282	349	6.19	4.65	6.7	9.09	7.59	9.34
SK1G00040184	MergePeak_878	quadrant5	no	148	99	136	191	166	203	315	291	210	206	393	236	322	196	316	342	342	426	404	308	398	384	255	262	246	437	366	395	266	231	294	259	396	208	257	259	329	319	282	349	6.19	4.65	6.7	9.09	7.59	9.34
SK1G00040185	MergePeak_879	quadrant5	no	172	126	157	116	135	130	171	156	132	143	147	206	191	133	143	197	197	196	171	171	167	155	211	148	189	211	194	177	225	280	202	179	205	189	206	258	184	227	256	233	10.27	8.45	11.04	7.88	8.81	8.53
SK1G00040185	MergePeak_880	quadrant5	no	172	126	157	116	135	130	171	156	132	143	147	206	191	133	143	197	197	196	171	171	167	155	211	148	189	211	194	177	225	280	202	179	205	189	206	258	184	227	256	233	10.27	8.45	11.04	7.88	8.81	8.53
SK1G00040186	MergePeak_881	quadrant5	no	386	320	279	301	325	315	320	311	330	357	335	370	310	306	329	459	379	526	483	452	429	426	579	441	487	442	427	485	576	514	533	477	653	387	574	541	518	511	603	553	14.23	13.24	12.11	12.63	13.09	12.77
SK1G00040187	MergePeak_882	quadrant5	no	278	255	225	257	289	274	317	262	261	257	203	270	299	301	249	342	287	330	317	259	289	322	310	282	210	263	245	265	338	304	292	267	257	240	257	279	284	279	309	340	12.6	12.98	12.01	13.26	14.32	13.66
SK1G00040187	MergePeak_883	quadrant5	no	278	255	225	257	289	274	317	262	261	257	203	270	299	301	249	342	287	330	317	259	289	322	310	282	210	263	245	265	338	304	292	267	257	240	257	279	284	279	309	340	12.6	12.98	12.01	13.26	14.32	13.66
SK1G00040187	MergePeak_884	quadrant5	no	278	255	225	257	289	274	317	262	261	257	203	270	299	301	249	342	287	330	317	259	289	322	310	282	210	263	245	265	338	304	292	267	257	240	257	279	284	279	309	340	12.6	12.98	12.01	13.26	14.32	13.66
SK1G00040188	MergePeak_885	quadrant5	no	3802	3006	3295	2978	3134	2706	3085	2989	2965	3154	2609	3468	2932	2519	2717	3760	3433	3713	2645	3036	2585	2730	2996	2315	2396	2249	2050	2394	2839	3039	2823	2711	2942	2657	2863	3202	2723	2939	3206	2869	112.34	99.73	114.66	100.15	101.22	87.93
SK1G00040188	MergePeak_886	quadrant5	no	3802	3006	3295	2978	3134	2706	3085	2989	2965	3154	2609	3468	2932	2519	2717	3760	3433	3713	2645	3036	2585	2730	2996	2315	2396	2249	2050	2394	2839	3039	2823	2711	2942	2657	2863	3202	2723	2939	3206	2869	112.34	99.73	114.66	100.15	101.22	87.93
SK1G00040188	MergePeak_887	quadrant5	no	3802	3006	3295	2978	3134	2706	3085	2989	2965	3154	2609	3468	2932	2519	2717	3760	3433	3713	2645	3036	2585	2730	2996	2315	2396	2249	2050	2394	2839	3039	2823	2711	2942	2657	2863	3202	2723	2939	3206	2869	112.34	99.73	114.66	100.15	101.22	87.93
SK1G00040197	MergePeak_888	quadrant5	no	38	61	40	12	43	20	32	30	25	28	17	17	62	60	55	62	51	77	18	37	26	51	51	52	29	27	8	28	22	51	26	55	34	54	28	45	42	33	34	53	1.59	2.86	1.97	0.57	1.96	0.92
SK1G00040199	MergePeak_889	quadrant5	no	108	93	85	93	116	84	88	93	74	50	74	99	95	56	66	90	76	78	77	107	57	75	104	120	70	111	110	101	92	124	80	86	131	82	100	104	85	91	125	108	2.59	2.5	2.4	2.54	3.04	2.21
SK1G00040201	MergePeak_890	quadrant5	no	261	266	228	216	300	257	273	254	320	306	280	318	396	208	285	351	286	379	295	304	307	301	373	264	301	332	332	365	297	358	277	299	376	305	390	330	327	348	451	370	13.13	15.03	13.51	12.37	16.5	14.22
SK1G00040201	MergePeak_891	quadrant5	no	261	266	228	216	300	257	273	254	320	306	280	318	396	208	285	351	286	379	295	304	307	301	373	264	301	332	332	365	297	358	277	299	376	305	390	330	327	348	451	370	13.13	15.03	13.51	12.37	16.5	14.22
SK1G00040203	MergePeak_892	quadrant4	no	22	17	16	24	14	18	22	6	29	21	11	10	21	29	20	20	19	23	17	23	3	16	34	16	15	13	28	13	23	22	26	25	29	26	27	37	27	24	35	24	1.26	1.1	1.08	1.57	0.88	1.14
SK1G00040204	MergePeak_893	quadrant5	no	116	94	84	79	76	93	131	56	80	96	84	95	101	101	77	106	108	131	118	84	104	96	134	151	96	127	116	127	192	136	128	118	185	138	145	179	144	182	159	169	4.46	4.06	3.8	3.46	3.19	3.93
SK1G00040204	MergePeak_894	quadrant5	no	116	94	84	79	76	93	131	56	80	96	84	95	101	101	77	106	108	131	118	84	104	96	134	151	96	127	116	127	192	136	128	118	185	138	145	179	144	182	159	169	4.46	4.06	3.8	3.46	3.19	3.93
SK1G00040205	MergePeak_895	quadrant5	no	326	314	276	279	290	254	331	266	326	252	261	317	287	205	227	357	277	312	245	289	255	241	344	275	250	242	257	243	351	352	236	264	326	282	322	341	259	301	403	360	10.34	11.18	10.31	10.07	10.06	8.86
SK1G00040208	MergePeak_896	quadrant5	no	219	204	193	199	187	195	204	170	191	173	179	182	203	170	167	234	190	189	175	177	147	158	252	228	195	230	202	211	217	250	197	191	260	198	258	308	239	336	315	280	6.4	6.7	6.65	6.62	5.98	6.27
SK1G00040209	MergePeak_897	quadrant8	no	6401	5096	5342	4806	5286	4553	4289	3769	4100	4259	3042	4102	3213	3011	2873	4610	4176	3712	3082	3093	2664	2542	2096	1506	851	1178	1021	1457	2060	2069	1765	1865	1807	1812	1550	2212	1826	1723	1853	1984	124.22	111.04	122.09	106.16	112.13	97.17
SK1G00040209	MergePeak_898	quadrant8	no	6401	5096	5342	4806	5286	4553	4289	3769	4100	4259	3042	4102	3213	3011	2873	4610	4176	3712	3082	3093	2664	2542	2096	1506	851	1178	1021	1457	2060	2069	1765	1865	1807	1812	1550	2212	1826	1723	1853	1984	124.22	111.04	122.09	106.16	112.13	97.17
SK1G00040209	MergePeak_899	quadrant8	no	6401	5096	5342	4806	5286	4553	4289	3769	4100	4259	3042	4102	3213	3011	2873	4610	4176	3712	3082	3093	2664	2542	2096	1506	851	1178	1021	1457	2060	2069	1765	1865	1807	1812	1550	2212	1826	1723	1853	1984	124.22	111.04	122.09	106.16	112.13	97.17
SK1G00040213	MergePeak_900	quadrant8	no	7233	4325	5240	4258	4628	3082	3062	2371	1303	1315	2188	1960	1660	1057	1480	3006	2317	1586	839	1153	828	746	1918	1243	861	1539	1469	1146	793	1616	1011	1297	1831	675	1459	1245	1484	1487	2931	1731	269.45	180.91	229.9	180.55	188.46	126.27
SK1G00040213	MergePeak_901	quadrant8	no	7233	4325	5240	4258	4628	3082	3062	2371	1303	1315	2188	1960	1660	1057	1480	3006	2317	1586	839	1153	828	746	1918	1243	861	1539	1469	1146	793	1616	1011	1297	1831	675	1459	1245	1484	1487	2931	1731	269.45	180.91	229.9	180.55	188.46	126.27
SK1G00040214	MergePeak_902	quadrant2	no	0	0	0	0	0	0	0	0	0	0	0	0	0	0	0	0	0	0	1	0	2	0	2	1	2	0	0	0	0	0	0	0	0	0	0	0	0	0	0	0	0	0	0	0	0	0
SK1G00040215	MergePeak_903	quadrant5	no	126	71	108	87	117	78	104	94	109	96	79	126	122	89	82	131	135	96	83	110	90	92	125	117	127	123	97	97	103	156	136	127	152	98	129	160	159	139	209	133	4.96	3.14	5.01	3.9	5.04	3.38
SK1G00040216	MergePeak_904	quadrant5	no	1686	951	1022	1140	1345	1979	1565	1978	1632	1282	1792	2204	2571	2390	2305	2415	3038	2865	2613	2708	2985	2417	2441	2426	2581	2381	2290	2350	2661	2547	1999	2198	1728	2271	1569	2235	2181	2199	2173	3221	28.18	17.85	20.12	21.69	24.57	36.37
SK1G00040216	MergePeak_905	quadrant5	no	1686	951	1022	1140	1345	1979	1565	1978	1632	1282	1792	2204	2571	2390	2305	2415	3038	2865	2613	2708	2985	2417	2441	2426	2581	2381	2290	2350	2661	2547	1999	2198	1728	2271	1569	2235	2181	2199	2173	3221	28.18	17.85	20.12	21.69	24.57	36.37
SK1G00040216	MergePeak_906	quadrant5	no	1686	951	1022	1140	1345	1979	1565	1978	1632	1282	1792	2204	2571	2390	2305	2415	3038	2865	2613	2708	2985	2417	2441	2426	2581	2381	2290	2350	2661	2547	1999	2198	1728	2271	1569	2235	2181	2199	2173	3221	28.18	17.85	20.12	21.69	24.57	36.37
SK1G00040216	MergePeak_907	quadrant5	no	1686	951	1022	1140	1345	1979	1565	1978	1632	1282	1792	2204	2571	2390	2305	2415	3038	2865	2613	2708	2985	2417	2441	2426	2581	2381	2290	2350	2661	2547	1999	2198	1728	2271	1569	2235	2181	2199	2173	3221	28.18	17.85	20.12	21.69	24.57	36.37
SK1G00040218	MergePeak_908	quadrant5	no	2779	2730	2657	2155	2149	1656	2295	1592	2240	2471	1524	2230	1873	1278	1366	2556	1652	2267	1546	1699	1620	2033	1934	1745	2040	1761	1675	1887	2322	2094	2167	1776	3297	1823	2453	2457	1997	2385	2585	2379	88.69	97.83	99.87	78.28	74.97	58.12
SK1G00040221	MergePeak_909	quadrant5	no	152	76	177	144	155	114	128	140	132	160	141	200	205	253	179	283	247	285	241	284	205	267	327	374	221	279	286	281	303	343	240	247	378	258	241	365	280	330	414	292	5.14	2.89	7.06	5.55	5.73	4.24
SK1G00040221	MergePeak_910	quadrant5	no	152	76	177	144	155	114	128	140	132	160	141	200	205	253	179	283	247	285	241	284	205	267	327	374	221	279	286	281	303	343	240	247	378	258	241	365	280	330	414	292	5.14	2.89	7.06	5.55	5.73	4.24
SK1G00040222	MergePeak_911	quadrant5	no	182	166	187	144	198	151	188	150	156	202	195	248	244	226	221	282	232	323	232	308	213	302	327	323	315	334	305	369	475	457	430	330	396	343	396	482	402	538	512	418	5.64	5.78	6.83	5.08	6.71	5.15
SK1G00040226	MergePeak_912	quadrant2	no	6	11	6	3	13	5	9	3	7	9	7	5	10	7	22	20	25	18	16	15	23	11	23	29	36	20	21	49	23	15	36	23	5	32	28	23	30	24	29	28	0.56	1.15	0.66	0.32	1.32	0.51
SK1G00040227	MergePeak_913	quadrant5	no	459	373	544	477	731	682	894	829	724	706	847	1024	978	871	908	1144	907	1155	1205	1016	1151	941	934	815	892	1251	1233	921	1041	1031	1552	1229	1172	960	1238	1033	1033	1100	934	1192	13.96	12.74	19.49	16.51	24.3	22.81
SK1G00040227	MergePeak_914	quadrant5	no	459	373	544	477	731	682	894	829	724	706	847	1024	978	871	908	1144	907	1155	1205	1016	1151	941	934	815	892	1251	1233	921	1041	1031	1552	1229	1172	960	1238	1033	1033	1100	934	1192	13.96	12.74	19.49	16.51	24.3	22.81
SK1G00040227	MergePeak_915	quadrant5	no	459	373	544	477	731	682	894	829	724	706	847	1024	978	871	908	1144	907	1155	1205	1016	1151	941	934	815	892	1251	1233	921	1041	1031	1552	1229	1172	960	1238	1033	1033	1100	934	1192	13.96	12.74	19.49	16.51	24.3	22.81
SK1G00040229	MergePeak_916	quadrant8	no	450	242	281	224	204	146	173	161	160	156	89	143	107	118	86	179	173	93	91	89	72	106	55	36	46	28	35	42	61	64	62	57	50	43	43	88	46	65	50	37	54.51	32.91	40.09	30.88	27.01	19.45
SK1G00040232	MergePeak_917	quadrant5	no	198	157	126	146	151	121	169	106	138	142	123	180	184	159	138	214	198	203	168	202	165	203	287	351	217	340	290	211	291	336	327	226	373	253	302	384	349	403	393	395	28.81	25.65	21.59	24.18	24.02	19.36
SK1G00040234	MergePeak_918	quadrant9	no	58	215	73	104	144	229	215	83	184	45	75	56	166	71	74	68	78	112	46	33	72	25	36	57	23	22	18	28	131	56	40	35	28	18	64	13	48	50	49	74	2.51	10.44	3.72	5.12	6.81	10.89
SK1G00040237	MergePeak_919	quadrant5	no	43	33	31	26	23	31	30	11	11	11	21	28	11	15	24	41	15	32	24	15	18	25	45	49	88	43	19	47	51	66	33	35	40	48	72	39	50	40	110	75	4.26	3.67	3.62	2.93	2.49	3.38
SK1G00040239	MergePeak_920	quadrant5	no	776	658	833	858	856	825	904	708	661	703	642	773	795	674	723	865	754	760	697	610	587	502	609	543	488	683	680	425	502	498	498	493	643	388	564	630	714	619	869	630	23.28	22.17	29.44	29.3	28.07	27.22
SK1G00040243	MergePeak_921	quadrant5	no	519	357	421	419	434	384	409	362	393	363	404	440	490	450	416	588	472	478	412	432	408	462	554	593	451	440	481	466	526	501	562	481	519	507	543	690	606	678	672	521	21.09	16.29	20.15	19.38	19.28	17.16
SK1G00040243	MergePeak_922	quadrant5	no	519	357	421	419	434	384	409	362	393	363	404	440	490	450	416	588	472	478	412	432	408	462	554	593	451	440	481	466	526	501	562	481	519	507	543	690	606	678	672	521	21.09	16.29	20.15	19.38	19.28	17.16
SK1G00040245	MergePeak_923	quadrant9	yes	1955	2192	1374	1814	1374	1178	1736	1072	470	384	1221	831	786	337	646	1010	858	722	768	458	653	449	1305	264	334	524	749	425	288	333	217	330	504	145	314	250	555	274	655	365	59.29	74.64	49.07	62.61	45.55	39.29
SK1G00040245	MergePeak_924	quadrant8	no	1955	2192	1374	1814	1374	1178	1736	1072	470	384	1221	831	786	337	646	1010	858	722	768	458	653	449	1305	264	334	524	749	425	288	333	217	330	504	145	314	250	555	274	655	365	59.29	74.64	49.07	62.61	45.55	39.29
SK1G00040246	MergePeak_925	quadrant5	no	489	511	224	712	606	564	837	654	236	321	583	435	374	255	623	404	527	363	554	354	689	453	621	285	259	374	470	244	218	177	215	208	226	129	207	175	272	188	168	172	28.37	33.29	15.31	47.02	38.43	35.99
SK1G00040246	MergePeak_926	quadrant5	no	489	511	224	712	606	564	837	654	236	321	583	435	374	255	623	404	527	363	554	354	689	453	621	285	259	374	470	244	218	177	215	208	226	129	207	175	272	188	168	172	28.37	33.29	15.31	47.02	38.43	35.99
SK1G00040255	MergePeak_927	quadrant5	no	2445	2092	2098	2323	2462	2290	2844	2412	2505	2421	2381	2981	2863	2488	2479	3347	2883	3365	2815	2995	2852	2835	3590	3102	2686	3514	3278	3066	3315	3502	3521	3167	3926	3322	3672	4162	3779	3832	4099	3818	51.98	49.94	52.53	56.21	57.21	53.54
SK1G00040255	MergePeak_928	quadrant5	no	2445	2092	2098	2323	2462	2290	2844	2412	2505	2421	2381	2981	2863	2488	2479	3347	2883	3365	2815	2995	2852	2835	3590	3102	2686	3514	3278	3066	3315	3502	3521	3167	3926	3322	3672	4162	3779	3832	4099	3818	51.98	49.94	52.53	56.21	57.21	53.54
SK1G00040257	MergePeak_929	quadrant5	no	1161	973	912	1030	1083	1079	1130	982	1111	1058	995	1301	1359	1199	1001	1546	1189	1501	1364	1199	1183	1388	1655	1687	738	1563	1596	1342	1638	1589	1556	1249	1635	1361	1584	2009	1775	1954	1851	1687	101.3	95.3	93.7	102.31	103.29	103.54
SK1G00040257	MergePeak_930	quadrant5	no	1161	973	912	1030	1083	1079	1130	982	1111	1058	995	1301	1359	1199	1001	1546	1189	1501	1364	1199	1183	1388	1655	1687	738	1563	1596	1342	1638	1589	1556	1249	1635	1361	1584	2009	1775	1954	1851	1687	101.3	95.3	93.7	102.31	103.29	103.54
SK1G00040259	MergePeak_931	quadrant5	no	1140	1039	887	1123	1102	1143	1097	1040	953	1027	1000	1105	1222	1317	1136	1314	1235	1448	1229	1228	1093	1275	1602	1588	1383	1444	1310	1287	1464	1554	1591	1188	1710	1149	1408	1775	1731	2041	1629	1723	84.85	86.86	77.78	95.13	89.67	93.56
SK1G00040259	MergePeak_932	quadrant5	no	1140	1039	887	1123	1102	1143	1097	1040	953	1027	1000	1105	1222	1317	1136	1314	1235	1448	1229	1228	1093	1275	1602	1588	1383	1444	1310	1287	1464	1554	1591	1188	1710	1149	1408	1775	1731	2041	1629	1723	84.85	86.86	77.78	95.13	89.67	93.56
SK1G00040260	MergePeak_932	quadrant5	no	0	3	0	0	1	3	31	1	1	0	0	2	1	178	0	1	4	0	0	1	2	1	0	0	0	0	2	0	0	0	1	0	12	1	1	0	1	1	1	3	0	0.14	0	0	0.05	0.14
SK1G00040262	MergePeak_933	quadrant5	no	168	98	112	99	127	89	76	96	64	100	80	131	128	64	87	137	114	136	126	110	117	131	201	118	148	110	104	94	167	135	157	119	173	133	179	212	201	187	230	163	3.38	2.22	2.66	2.27	2.8	1.97
SK1G00040264	MergePeak_934	quadrant5	no	1388	1340	1545	1607	1665	1362	1711	1643	2075	2188	1755	2360	1982	1920	2087	2664	2456	2635	2081	2662	2360	2243	2949	2149	1820	2289	2087	2180	2461	2688	2916	2563	2867	2591	2633	3325	3033	2694	2944	2879	35.61	38.6	46.68	46.93	46.69	38.43
SK1G00040264	MergePeak_935	quadrant5	no	1388	1340	1545	1607	1665	1362	1711	1643	2075	2188	1755	2360	1982	1920	2087	2664	2456	2635	2081	2662	2360	2243	2949	2149	1820	2289	2087	2180	2461	2688	2916	2563	2867	2591	2633	3325	3033	2694	2944	2879	35.61	38.6	46.68	46.93	46.69	38.43
SK1G00040264	MergePeak_936	quadrant5	no	1388	1340	1545	1607	1665	1362	1711	1643	2075	2188	1755	2360	1982	1920	2087	2664	2456	2635	2081	2662	2360	2243	2949	2149	1820	2289	2087	2180	2461	2688	2916	2563	2867	2591	2633	3325	3033	2694	2944	2879	35.61	38.6	46.68	46.93	46.69	38.43
SK1G00040265	MergePeak_936	quadrant2	no	0	0	0	0	0	0	0	0	0	0	0	0	0	0	0	0	0	0	0	0	0	0	0	0	0	0	0	0	0	0	0	0	0	0	1	0	3	0	0	0	0	0	0	0	0	0
SK1G00040266	MergePeak_937	quadrant5	no	3646	3641	3764	3799	4205	3923	4607	3680	4377	4525	4045	5130	5347	4352	4271	6100	4930	6435	5314	5209	5587	5209	6290	6171	4715	6558	6417	5913	6426	7034	6599	5898	7573	5724	6589	7491	7621	7256	8136	7378	60.79	68.16	73.91	72.09	76.63	71.93
SK1G00040266	MergePeak_938	quadrant5	no	3646	3641	3764	3799	4205	3923	4607	3680	4377	4525	4045	5130	5347	4352	4271	6100	4930	6435	5314	5209	5587	5209	6290	6171	4715	6558	6417	5913	6426	7034	6599	5898	7573	5724	6589	7491	7621	7256	8136	7378	60.79	68.16	73.91	72.09	76.63	71.93
SK1G00040266	MergePeak_939	quadrant5	no	3646	3641	3764	3799	4205	3923	4607	3680	4377	4525	4045	5130	5347	4352	4271	6100	4930	6435	5314	5209	5587	5209	6290	6171	4715	6558	6417	5913	6426	7034	6599	5898	7573	5724	6589	7491	7621	7256	8136	7378	60.79	68.16	73.91	72.09	76.63	71.93
SK1G00040267	MergePeak_940	quadrant5	no	216	190	176	239	221	267	245	184	221	201	219	228	272	169	304	239	289	279	305	233	302	311	535	482	511	478	451	387	435	393	457	358	463	310	398	424	553	521	511	555	5.68	5.61	5.45	7.15	6.35	7.72
SK1G00040271	MergePeak_941	quadrant5	no	2124	1630	2208	1892	1938	1639	1991	1826	2036	2036	1461	1908	1968	1620	1636	2204	1850	2082	1760	1999	1507	1654	2036	1463	1427	1533	1524	1536	1688	1891	1503	1465	1860	1692	1519	1998	1842	1734	1954	1670	51.74	44.58	63.34	52.46	51.6	43.91
SK1G00040271	MergePeak_942	quadrant5	no	2124	1630	2208	1892	1938	1639	1991	1826	2036	2036	1461	1908	1968	1620	1636	2204	1850	2082	1760	1999	1507	1654	2036	1463	1427	1533	1524	1536	1688	1891	1503	1465	1860	1692	1519	1998	1842	1734	1954	1670	51.74	44.58	63.34	52.46	51.6	43.91
SK1G00040273	MergePeak_943	quadrant5	no	169	215	152	197	200	204	238	204	199	185	181	202	224	195	154	206	195	208	190	211	200	201	263	154	114	122	151	165	217	212	148	172	141	176	168	249	159	171	193	260	7.69	10.99	8.15	10.21	9.95	10.21
SK1G00040274	MergePeak_944	quadrant5	no	1743	1417	1696	1479	1562	1590	1649	1420	1549	1529	1510	1963	2163	1932	1644	2137	2152	2489	2016	2096	1931	2387	3656	3444	4741	3233	2920	2546	3073	3294	3038	2587	3569	2694	3461	3846	3268	4147	4140	3712	50.82	46.39	58.24	49.09	49.79	50.99
SK1G00040274	MergePeak_945	quadrant5	no	1743	1417	1696	1479	1562	1590	1649	1420	1549	1529	1510	1963	2163	1932	1644	2137	2152	2489	2016	2096	1931	2387	3656	3444	4741	3233	2920	2546	3073	3294	3038	2587	3569	2694	3461	3846	3268	4147	4140	3712	50.82	46.39	58.24	49.09	49.79	50.99
SK1G00040274	MergePeak_946	quadrant5	no	1743	1417	1696	1479	1562	1590	1649	1420	1549	1529	1510	1963	2163	1932	1644	2137	2152	2489	2016	2096	1931	2387	3656	3444	4741	3233	2920	2546	3073	3294	3038	2587	3569	2694	3461	3846	3268	4147	4140	3712	50.82	46.39	58.24	49.09	49.79	50.99
SK1G00040274	MergePeak_947	quadrant5	no	1743	1417	1696	1479	1562	1590	1649	1420	1549	1529	1510	1963	2163	1932	1644	2137	2152	2489	2016	2096	1931	2387	3656	3444	4741	3233	2920	2546	3073	3294	3038	2587	3569	2694	3461	3846	3268	4147	4140	3712	50.82	46.39	58.24	49.09	49.79	50.99
SK1G00040275	MergePeak_948	quadrant5	no	6	15	3	4	14	5	12	14	5	5	2	3	5	3	3	11	10	5	2	4	6	4	20	13	14	13	14	13	13	11	7	11	9	5	23	13	15	17	15	21	0.58	1.63	0.34	0.44	1.48	0.53
SK1G00040279	MergePeak_949	quadrant5	no	859	673	795	728	756	609	751	499	585	637	503	603	611	524	562	843	556	653	649	556	553	633	583	511	381	444	417	487	551	602	527	503	669	555	574	589	507	565	683	495	10.37	9.11	11.3	10	9.96	8.08
SK1G00040279	MergePeak_950	quadrant4	no	859	673	795	728	756	609	751	499	585	637	503	603	611	524	562	843	556	653	649	556	553	633	583	511	381	444	417	487	551	602	527	503	669	555	574	589	507	565	683	495	10.37	9.11	11.3	10	9.96	8.08
SK1G00040279	MergePeak_951	quadrant5	no	859	673	795	728	756	609	751	499	585	637	503	603	611	524	562	843	556	653	649	556	553	633	583	511	381	444	417	487	551	602	527	503	669	555	574	589	507	565	683	495	10.37	9.11	11.3	10	9.96	8.08
SK1G00040279	MergePeak_952	quadrant5	no	859	673	795	728	756	609	751	499	585	637	503	603	611	524	562	843	556	653	649	556	553	633	583	511	381	444	417	487	551	602	527	503	669	555	574	589	507	565	683	495	10.37	9.11	11.3	10	9.96	8.08
SK1G00040281	MergePeak_953	quadrant8	no	528	421	499	383	435	308	335	297	238	237	234	262	179	166	167	339	218	211	172	168	160	151	202	114	175	161	155	114	137	163	156	125	163	102	155	136	189	168	188	163	35.74	32	39.78	29.51	32.19	22.93
SK1G00040287	MergePeak_954	quadrant5	no	3186	2731	3043	3327	3149	3169	3447	2942	3001	3080	2845	3184	3544	2717	2910	3992	3526	4234	3629	3523	3660	3067	4401	4131	4422	5352	4590	3943	4467	4635	4215	3750	5237	3708	5448	5259	5137	5455	5223	5246	31.09	29.92	34.97	36.95	33.59	34.01
SK1G00040287	MergePeak_955	quadrant5	no	3186	2731	3043	3327	3149	3169	3447	2942	3001	3080	2845	3184	3544	2717	2910	3992	3526	4234	3629	3523	3660	3067	4401	4131	4422	5352	4590	3943	4467	4635	4215	3750	5237	3708	5448	5259	5137	5455	5223	5246	31.09	29.92	34.97	36.95	33.59	34.01
SK1G00040287	MergePeak_956	quadrant5	no	3186	2731	3043	3327	3149	3169	3447	2942	3001	3080	2845	3184	3544	2717	2910	3992	3526	4234	3629	3523	3660	3067	4401	4131	4422	5352	4590	3943	4467	4635	4215	3750	5237	3708	5448	5259	5137	5455	5223	5246	31.09	29.92	34.97	36.95	33.59	34.01
SK1G00040288	MergePeak_957	quadrant5	no	217	215	247	293	406	291	568	398	141	163	285	329	410	196	391	526	516	269	235	210	232	228	355	293	269	586	379	223	267	252	257	374	379	181	217	349	297	294	505	405	10.29	11.44	13.79	15.81	21.04	15.17
SK1G00040288	MergePeak_958	quadrant5	no	217	215	247	293	406	291	568	398	141	163	285	329	410	196	391	526	516	269	235	210	232	228	355	293	269	586	379	223	267	252	257	374	379	181	217	349	297	294	505	405	10.29	11.44	13.79	15.81	21.04	15.17
SK1G00040291	MergePeak_959	quadrant5	no	1914	1679	1793	1585	1724	1506	1612	1319	1660	1690	1539	1919	1910	1729	1667	2411	2351	2533	1775	2004	1857	2011	2922	2665	2321	2612	2449	2329	2590	2896	2582	2353	2996	2227	3175	3109	3120	3375	3408	3356	31.43	30.96	34.68	29.63	30.95	27.2
SK1G00040291	MergePeak_960	quadrant5	no	1914	1679	1793	1585	1724	1506	1612	1319	1660	1690	1539	1919	1910	1729	1667	2411	2351	2533	1775	2004	1857	2011	2922	2665	2321	2612	2449	2329	2590	2896	2582	2353	2996	2227	3175	3109	3120	3375	3408	3356	31.43	30.96	34.68	29.63	30.95	27.2
SK1G00040291	MergePeak_961	quadrant5	no	1914	1679	1793	1585	1724	1506	1612	1319	1660	1690	1539	1919	1910	1729	1667	2411	2351	2533	1775	2004	1857	2011	2922	2665	2321	2612	2449	2329	2590	2896	2582	2353	2996	2227	3175	3109	3120	3375	3408	3356	31.43	30.96	34.68	29.63	30.95	27.2
SK1G00040292	MergePeak_962	quadrant5	no	372	334	338	284	310	245	288	186	230	307	322	300	272	247	193	346	284	346	300	250	270	331	479	592	382	696	511	429	570	412	598	466	753	395	560	624	595	742	654	607	28.26	28.49	30.24	24.56	25.74	20.47
SK1G00040292	MergePeak_963	quadrant5	no	372	334	338	284	310	245	288	186	230	307	322	300	272	247	193	346	284	346	300	250	270	331	479	592	382	696	511	429	570	412	598	466	753	395	560	624	595	742	654	607	28.26	28.49	30.24	24.56	25.74	20.47
SK1G00040292	MergePeak_964	quadrant5	no	372	334	338	284	310	245	288	186	230	307	322	300	272	247	193	346	284	346	300	250	270	331	479	592	382	696	511	429	570	412	598	466	753	395	560	624	595	742	654	607	28.26	28.49	30.24	24.56	25.74	20.47
SK1G00040293	MergePeak_965	quadrant5	no	66	56	72	40	48	57	60	59	49	54	43	58	53	47	43	64	58	57	71	46	36	64	60	42	23	40	32	55	52	83	77	66	56	62	74	61	53	49	70	73	6.24	5.95	8.02	4.31	4.96	5.93
SK1G00040294	MergePeak_966	quadrant5	no	897	796	695	1068	1008	1208	1038	947	846	678	806	947	1249	1134	1010	1172	1199	1189	1135	934	1225	1048	1408	1281	1150	1249	1206	1130	1221	1331	1193	1012	1000	917	902	1276	1152	1379	1106	1348	41.59	41.45	37.96	56.37	51.09	61.61
SK1G00040294	MergePeak_967	quadrant5	no	897	796	695	1068	1008	1208	1038	947	846	678	806	947	1249	1134	1010	1172	1199	1189	1135	934	1225	1048	1408	1281	1150	1249	1206	1130	1221	1331	1193	1012	1000	917	902	1276	1152	1379	1106	1348	41.59	41.45	37.96	56.37	51.09	61.61
SK1G00040295	MergePeak_968	quadrant5	no	76	122	48	82	61	56	50	54	72	58	56	67	66	103	111	106	128	104	72	103	72	73	108	80	57	45	45	67	77	93	96	80	68	109	57	103	73	48	74	73	2.84	5.13	2.12	3.49	2.5	2.31
SK1G00040295	MergePeak_969	quadrant5	no	76	122	48	82	61	56	50	54	72	58	56	67	66	103	111	106	128	104	72	103	72	73	108	80	57	45	45	67	77	93	96	80	68	109	57	103	73	48	74	73	2.84	5.13	2.12	3.49	2.5	2.31
SK1G00040296	MergePeak_970	quadrant5	no	172	136	154	151	153	164	208	204	234	274	230	307	241	219	198	362	316	301	261	301	283	282	331	284	398	317	241	299	328	334	375	309	312	313	331	347	378	331	431	383	7.2	6.39	7.59	7.2	7	7.55
SK1G00040297	MergePeak_971	quadrant5	no	5277	4091	4171	4620	4181	3801	4802	3797	2625	2424	3159	3977	2800	2205	2826	4544	3734	3749	4112	2465	3595	2463	3228	2590	3549	3993	3857	2654	2194	3147	2993	2844	3578	1923	2776	2651	3425	3607	3102	3197	141.09	122.82	131.34	140.6	122.2	111.77
SK1G00040297	MergePeak_972	quadrant5	no	5277	4091	4171	4620	4181	3801	4802	3797	2625	2424	3159	3977	2800	2205	2826	4544	3734	3749	4112	2465	3595	2463	3228	2590	3549	3993	3857	2654	2194	3147	2993	2844	3578	1923	2776	2651	3425	3607	3102	3197	141.09	122.82	131.34	140.6	122.2	111.77
SK1G00040297	MergePeak_973	quadrant5	no	5277	4091	4171	4620	4181	3801	4802	3797	2625	2424	3159	3977	2800	2205	2826	4544	3734	3749	4112	2465	3595	2463	3228	2590	3549	3993	3857	2654	2194	3147	2993	2844	3578	1923	2776	2651	3425	3607	3102	3197	141.09	122.82	131.34	140.6	122.2	111.77
SK1G00040302	MergePeak_974	quadrant5	no	2119	1729	1996	1918	2012	2060	2207	1934	2213	2043	1998	2287	2341	1925	1889	2615	2402	2468	2134	2507	2212	2185	2697	2295	1849	2314	2224	2202	2644	2669	2485	2255	2538	2201	2346	2716	3005	2638	3086	2816	40.64	37.23	45.08	41.87	42.18	43.45
SK1G00040302	MergePeak_975	quadrant5	no	2119	1729	1996	1918	2012	2060	2207	1934	2213	2043	1998	2287	2341	1925	1889	2615	2402	2468	2134	2507	2212	2185	2697	2295	1849	2314	2224	2202	2644	2669	2485	2255	2538	2201	2346	2716	3005	2638	3086	2816	40.64	37.23	45.08	41.87	42.18	43.45
SK1G00040303	MergePeak_976	quadrant5	no	24	112	22	64	62	126	48	103	67	26	52	41	104	84	93	36	115	113	72	60	100	41	112	111	153	102	101	77	76	103	68	51	97	80	69	50	73	85	108	138	0.82	4.31	0.89	2.5	2.32	4.75
SK1G00040303	MergePeak_977	quadrant5	no	24	112	22	64	62	126	48	103	67	26	52	41	104	84	93	36	115	113	72	60	100	41	112	111	153	102	101	77	76	103	68	51	97	80	69	50	73	85	108	138	0.82	4.31	0.89	2.5	2.32	4.75
SK1G00040304	MergePeak_978	quadrant5	no	35	305	17	99	78	106	68	79	30	14	35	17	117	98	272	40	100	58	41	50	89	23	117	50	19	31	33	31	62	44	26	13	22	28	20	28	38	36	33	47	1.23	12.06	0.7	3.97	3	4.1
SK1G00040304	MergePeak_979	quadrant5	no	35	305	17	99	78	106	68	79	30	14	35	17	117	98	272	40	100	58	41	50	89	23	117	50	19	31	33	31	62	44	26	13	22	28	20	28	38	36	33	47	1.23	12.06	0.7	3.97	3	4.1
SK1G00040305	MergePeak_980	quadrant5	no	341	291	313	295	311	272	289	314	326	302	330	322	333	363	315	404	449	456	384	451	435	441	513	479	369	524	485	448	576	491	523	460	565	492	495	657	583	591	609	559	15.77	15.11	17.04	15.52	15.72	13.83
SK1G00040306	MergePeak_981	quadrant5	no	1856	1496	1698	1612	1746	1532	1701	1631	1757	1819	1727	2205	2307	2152	1724	2873	2466	2945	2554	2352	2438	2483	3755	4197	3862	4572	3997	3100	3564	3659	4278	3166	4153	2817	4315	4963	4609	5434	4308	4645	98.4	89.06	106.03	97.28	101.19	89.33
SK1G00040306	MergePeak_982	quadrant5	no	1856	1496	1698	1612	1746	1532	1701	1631	1757	1819	1727	2205	2307	2152	1724	2873	2466	2945	2554	2352	2438	2483	3755	4197	3862	4572	3997	3100	3564	3659	4278	3166	4153	2817	4315	4963	4609	5434	4308	4645	98.4	89.06	106.03	97.28	101.19	89.33
SK1G00040309	MergePeak_983	quadrant5	no	64	96	51	75	67	86	53	54	47	49	35	29	78	90	48	79	47	88	49	41	86	79	114	110	87	107	140	103	155	107	100	82	72	61	119	109	81	154	82	90	3.81	6.42	3.57	5.08	4.36	5.63
SK1G00040313	MergePeak_984	quadrant5	no	1585	1185	1483	1820	1936	1827	2548	2063	2044	1949	1934	2780	2244	1738	2343	2359	2210	2268	2100	1989	2238	1831	1591	1788	1567	1957	1964	1638	1333	1400	2524	1917	1745	1621	1449	1591	1942	1448	1424	1887	56.44	47.38	62.19	73.77	75.36	71.55
SK1G00040315	MergePeak_985	quadrant5	no	215	170	161	220	196	182	251	172	173	133	185	218	178	141	147	225	201	205	190	195	203	148	219	247	292	188	274	202	242	216	253	200	219	218	213	233	213	256	275	248	2.72	2.41	2.4	3.17	2.71	2.53
SK1G00040316	MergePeak_986	quadrant5	no	75	70	78	65	65	78	79	71	58	54	66	51	77	71	73	69	84	76	40	81	66	78	128	112	107	91	68	90	122	122	54	78	111	64	108	109	89	125	103	138	2.8	2.94	3.43	2.77	2.66	3.21
SK1G00040320	MergePeak_987	quadrant8	no	31	19	15	30	33	16	12	14	13	7	5	5	7	4	12	16	15	9	18	8	3	6	18	7	13	23	9	6	14	17	6	7	17	8	16	7	17	15	18	8	4.83	3.32	2.75	5.32	5.62	2.74
SK1G00040321	MergePeak_988	quadrant5	no	622	571	689	571	632	596	610	604	640	600	643	612	732	632	536	775	693	766	678	740	657	748	997	995	1079	864	902	817	932	932	800	765	949	715	973	1052	885	1069	993	987	29.44	30.34	38.4	30.76	32.69	31.02
SK1G00040321	MergePeak_989	quadrant5	no	622	571	689	571	632	596	610	604	640	600	643	612	732	632	536	775	693	766	678	740	657	748	997	995	1079	864	902	817	932	932	800	765	949	715	973	1052	885	1069	993	987	29.44	30.34	38.4	30.76	32.69	31.02
SK1G00040322	MergePeak_990	quadrant6	no	104	70	69	77	75	79	83	59	82	69	76	71	90	75	81	110	89	117	85	100	102	94	128	102	109	106	95	94	108	95	90	100	100	101	110	95	142	108	122	124	0.58	0.44	0.46	0.49	0.46	0.49
SK1G00040322	MergePeak_991	quadrant5	no	104	70	69	77	75	79	83	59	82	69	76	71	90	75	81	110	89	117	85	100	102	94	128	102	109	106	95	94	108	95	90	100	100	101	110	95	142	108	122	124	0.58	0.44	0.46	0.49	0.46	0.49
SK1G00040323	MergePeak_992	quadrant5	no	112	109	119	87	108	83	95	96	101	92	113	156	118	84	75	153	130	167	107	101	109	112	157	101	117	111	111	123	145	138	129	135	145	109	139	165	143	127	186	179	6.82	7.46	8.54	6.03	7.19	5.56
SK1G00040323	MergePeak_993	quadrant5	no	112	109	119	87	108	83	95	96	101	92	113	156	118	84	75	153	130	167	107	101	109	112	157	101	117	111	111	123	145	138	129	135	145	109	139	165	143	127	186	179	6.82	7.46	8.54	6.03	7.19	5.56
SK1G00040324	MergePeak_994	quadrant5	no	597	620	568	505	640	571	443	502	597	577	475	723	728	632	793	803	912	1084	541	733	693	670	1021	764	737	563	640	637	878	1006	778	800	846	882	889	974	868	1011	1055	1128	18.18	21.21	20.38	17.51	21.31	19.13
SK1G00040330	MergePeak_995	quadrant5	no	1608	1414	1447	1592	1629	1583	1753	1606	1700	1542	1578	1861	2188	1784	1651	2180	1699	2245	1891	1809	2057	1941	2362	2464	1978	2657	2553	2100	2440	2250	2512	2053	2568	1897	2442	2872	2951	2830	2694	2464	106.98	105.63	113.38	120.55	118.47	115.82
SK1G00040330	MergePeak_996	quadrant5	no	1608	1414	1447	1592	1629	1583	1753	1606	1700	1542	1578	1861	2188	1784	1651	2180	1699	2245	1891	1809	2057	1941	2362	2464	1978	2657	2553	2100	2440	2250	2512	2053	2568	1897	2442	2872	2951	2830	2694	2464	106.98	105.63	113.38	120.55	118.47	115.82
SK1G00040332	MergePeak_997	quadrant5	no	51	32	20	20	12	16	4	3	36	6	2	6	7	3	3	12	29	30	21	12	7	9	9	22	61	28	41	30	16	12	23	49	93	39	62	35	19	4	21	25	5.68	4	2.62	2.53	1.46	1.96
SK1G00040332	MergePeak_998	quadrant5	no	51	32	20	20	12	16	4	3	36	6	2	6	7	3	3	12	29	30	21	12	7	9	9	22	61	28	41	30	16	12	23	49	93	39	62	35	19	4	21	25	5.68	4	2.62	2.53	1.46	1.96
SK1G00040336	MergePeak_1000	quadrant5	no	377	312	364	381	413	371	426	402	389	314	365	491	480	406	426	451	484	460	390	527	417	506	475	428	449	427	358	437	581	498	490	466	471	486	449	538	480	485	557	485	12.61	11.72	14.34	14.51	15.11	13.65
SK1G00040336	MergePeak_999	quadrant5	no	377	312	364	381	413	371	426	402	389	314	365	491	480	406	426	451	484	460	390	527	417	506	475	428	449	427	358	437	581	498	490	466	471	486	449	538	480	485	557	485	12.61	11.72	14.34	14.51	15.11	13.65
SK1G00040338	MergePeak_1001	quadrant5	no	44	33	53	39	38	17	47	28	29	41	51	55	47	57	41	67	63	49	34	48	37	66	66	89	23	73	61	52	60	71	70	57	61	59	67	86	61	88	72	69	1.67	1.4	2.36	1.68	1.57	0.71
SK1G00040338	MergePeak_1002	quadrant5	no	44	33	53	39	38	17	47	28	29	41	51	55	47	57	41	67	63	49	34	48	37	66	66	89	23	73	61	52	60	71	70	57	61	59	67	86	61	88	72	69	1.67	1.4	2.36	1.68	1.57	0.71
SK1G00040338	MergePeak_1003	quadrant5	no	44	33	53	39	38	17	47	28	29	41	51	55	47	57	41	67	63	49	34	48	37	66	66	89	23	73	61	52	60	71	70	57	61	59	67	86	61	88	72	69	1.67	1.4	2.36	1.68	1.57	0.71
SK1G00040340	MergePeak_1004	quadrant5	no	4	3	2	2	12	1	4	1	12	7	14	5	5	2	2	1	3	6	6	7	3	7	4	8	17	8	9	0	9	3	10	4	8	4	8	8	10	10	20	8	0.38	0.32	0.22	0.22	1.25	0.1
SK1G00040345	MergePeak_1005	quadrant5	no	28	99	21	50	42	38	37	36	47	39	57	78	95	68	59	54	68	64	115	78	115	82	128	121	67	85	68	72	85	81	113	82	77	114	102	92	94	102	91	101	1.01	4.02	0.89	2.06	1.66	1.51
SK1G00040345	MergePeak_1006	quadrant5	no	28	99	21	50	42	38	37	36	47	39	57	78	95	68	59	54	68	64	115	78	115	82	128	121	67	85	68	72	85	81	113	82	77	114	102	92	94	102	91	101	1.01	4.02	0.89	2.06	1.66	1.51
SK1G00040346	MergePeak_1007	quadrant5	no	49	51	27	26	49	52	46	43	35	26	26	43	46	28	45	52	49	33	38	45	46	39	67	47	49	56	52	42	53	50	55	39	56	58	47	67	59	49	61	45	3.65	4.27	2.37	2.2	3.99	4.26
SK1G00040347	MergePeak_1008	quadrant5	no	165	1139	129	429	374	452	230	252	292	126	193	173	463	302	458	235	276	412	265	194	473	190	373	389	551	550	607	281	428	403	378	202	285	268	427	283	416	646	280	434	5.48	42.47	5.05	16.22	13.58	16.51
SK1G00040347	MergePeak_1009	quadrant5	no	165	1139	129	429	374	452	230	252	292	126	193	173	463	302	458	235	276	412	265	194	473	190	373	389	551	550	607	281	428	403	378	202	285	268	427	283	416	646	280	434	5.48	42.47	5.05	16.22	13.58	16.51
SK1G00040347	MergePeak_1010	quadrant5	no	165	1139	129	429	374	452	230	252	292	126	193	173	463	302	458	235	276	412	265	194	473	190	373	389	551	550	607	281	428	403	378	202	285	268	427	283	416	646	280	434	5.48	42.47	5.05	16.22	13.58	16.51
SK1G00040348	MergePeak_1011	quadrant5	no	171	195	188	220	240	232	272	249	222	203	296	338	344	218	295	434	399	445	385	379	379	413	500	478	466	614	566	481	426	448	486	422	531	327	597	629	550	599	664	611	10.7	13.69	13.85	15.65	16.41	15.94
SK1G00040348	MergePeak_1012	quadrant5	no	171	195	188	220	240	232	272	249	222	203	296	338	344	218	295	434	399	445	385	379	379	413	500	478	466	614	566	481	426	448	486	422	531	327	597	629	550	599	664	611	10.7	13.69	13.85	15.65	16.41	15.94
SK1G00040349	MergePeak_1013	quadrant5	no	509	449	535	524	512	537	626	416	506	465	415	576	627	511	448	600	641	643	492	626	499	567	699	744	552	677	614	585	725	717	644	597	697	567	676	727	643	709	740	747	14.53	14.39	17.98	17.02	15.97	16.86
SK1G00040349	MergePeak_1014	quadrant5	no	509	449	535	524	512	537	626	416	506	465	415	576	627	511	448	600	641	643	492	626	499	567	699	744	552	677	614	585	725	717	644	597	697	567	676	727	643	709	740	747	14.53	14.39	17.98	17.02	15.97	16.86
SK1G00040352	MergePeak_1015	quadrant5	no	667	641	408	567	434	625	515	371	419	352	427	440	514	494	397	525	641	539	522	467	573	454	611	559	413	373	393	417	765	606	472	444	539	449	519	589	573	624	715	855	17.97	19.39	12.95	17.39	12.78	18.52
SK1G00040352	MergePeak_1016	quadrant5	no	667	641	408	567	434	625	515	371	419	352	427	440	514	494	397	525	641	539	522	467	573	454	611	559	413	373	393	417	765	606	472	444	539	449	519	589	573	624	715	855	17.97	19.39	12.95	17.39	12.78	18.52
SK1G00040353	MergePeak_1017	quadrant5	no	2927	2302	2306	2005	2483	2002	2067	1871	2083	2063	1971	2676	2288	2161	2226	2692	2915	3026	2009	2438	2140	2259	2849	1984	2192	1638	1573	1911	2578	2500	2152	2128	2262	2332	2232	2863	2165	2175	2791	2668	222.34	196.35	206.3	173.36	206.18	167.25
SK1G00040353	MergePeak_1018	quadrant5	no	2927	2302	2306	2005	2483	2002	2067	1871	2083	2063	1971	2676	2288	2161	2226	2692	2915	3026	2009	2438	2140	2259	2849	1984	2192	1638	1573	1911	2578	2500	2152	2128	2262	2332	2232	2863	2165	2175	2791	2668	222.34	196.35	206.3	173.36	206.18	167.25
SK1G00040353	MergePeak_1019	quadrant5	no	2927	2302	2306	2005	2483	2002	2067	1871	2083	2063	1971	2676	2288	2161	2226	2692	2915	3026	2009	2438	2140	2259	2849	1984	2192	1638	1573	1911	2578	2500	2152	2128	2262	2332	2232	2863	2165	2175	2791	2668	222.34	196.35	206.3	173.36	206.18	167.25
SK1G00040354	MergePeak_1019	quadrant5	no	18	7	12	10	22	11	7	14	14	14	12	25	28	16	18	21	17	23	33	34	26	14	38	28	19	32	36	31	41	25	45	22	53	30	41	33	32	28	36	43	0.96	0.42	0.75	0.61	1.28	0.65
SK1G00040355	MergePeak_1020	quadrant5	no	755	1076	609	945	999	1262	745	897	865	587	695	749	1060	1173	1172	1080	1517	1370	715	948	1185	803	1266	1117	713	632	503	726	996	971	856	782	737	807	716	989	1027	890	879	1223	64.89	103.84	61.64	92.44	93.85	119.28
SK1G00040355	MergePeak_1021	quadrant5	no	755	1076	609	945	999	1262	745	897	865	587	695	749	1060	1173	1172	1080	1517	1370	715	948	1185	803	1266	1117	713	632	503	726	996	971	856	782	737	807	716	989	1027	890	879	1223	64.89	103.84	61.64	92.44	93.85	119.28
SK1G00040364	MergePeak_1022	quadrant5	no	2427	1662	2223	2084	2807	2758	3137	3145	2985	2902	3348	4056	4696	3938	3576	4404	5008	5173	4481	4676	4672	5055	6254	5742	6465	5895	5207	5090	6626	6657	5749	5529	6475	5183	6754	7413	6063	7036	7137	7679	188.74	145.13	203.61	184.47	238.62	235.89
SK1G00040364	MergePeak_1023	quadrant5	no	2427	1662	2223	2084	2807	2758	3137	3145	2985	2902	3348	4056	4696	3938	3576	4404	5008	5173	4481	4676	4672	5055	6254	5742	6465	5895	5207	5090	6626	6657	5749	5529	6475	5183	6754	7413	6063	7036	7137	7679	188.74	145.13	203.61	184.47	238.62	235.89
SK1G00040370	MergePeak_1024	quadrant5	no	274	404	225	343	332	408	312	265	344	296	333	404	595	378	472	364	518	488	465	418	535	404	590	499	368	389	407	428	457	454	341	392	378	414	330	428	427	412	483	494	11.03	18.27	10.67	15.72	14.61	18.07
SK1G00040370	MergePeak_1025	quadrant5	no	274	404	225	343	332	408	312	265	344	296	333	404	595	378	472	364	518	488	465	418	535	404	590	499	368	389	407	428	457	454	341	392	378	414	330	428	427	412	483	494	11.03	18.27	10.67	15.72	14.61	18.07
SK1G00040371	MergePeak_1026	quadrant5	no	108	108	90	82	110	123	120	102	83	107	122	86	106	131	85	104	140	157	125	134	135	140	165	135	128	102	142	140	162	156	141	114	168	135	133	123	170	185	237	171	3.89	4.37	3.82	3.36	4.33	4.88
SK1G00040373	MergePeak_1027	quadrant6	no	295	284	259	260	356	321	291	259	275	251	231	290	370	265	239	327	281	326	361	349	333	304	399	394	295	436	380	354	410	446	350	331	402	319	395	417	394	482	417	521	5.04	5.45	5.21	5.05	6.65	6.03
SK1G00040373	MergePeak_1028	quadrant5	no	295	284	259	260	356	321	291	259	275	251	231	290	370	265	239	327	281	326	361	349	333	304	399	394	295	436	380	354	410	446	350	331	402	319	395	417	394	482	417	521	5.04	5.45	5.21	5.05	6.65	6.03
SK1G00040375	MergePeak_1029	quadrant5	no	168	151	185	172	228	205	275	246	256	284	250	265	286	267	274	361	256	327	321	244	296	259	284	280	259	338	292	238	301	303	257	289	239	253	294	348	382	288	371	336	6.54	6.6	8.48	7.62	9.7	8.78
SK1G00040375	MergePeak_1030	quadrant5	no	168	151	185	172	228	205	275	246	256	284	250	265	286	267	274	361	256	327	321	244	296	259	284	280	259	338	292	238	301	303	257	289	239	253	294	348	382	288	371	336	6.54	6.6	8.48	7.62	9.7	8.78
SK1G00040375	MergePeak_1031	quadrant5	no	168	151	185	172	228	205	275	246	256	284	250	265	286	267	274	361	256	327	321	244	296	259	284	280	259	338	292	238	301	303	257	289	239	253	294	348	382	288	371	336	6.54	6.6	8.48	7.62	9.7	8.78
SK1G00040376	MergePeak_1032	quadrant5	no	130	111	100	80	109	101	80	70	109	102	110	126	119	99	75	155	131	127	96	106	120	110	143	88	139	84	78	81	93	107	101	116	109	123	135	160	127	100	120	108	3.25	3.12	2.94	2.28	2.98	2.78
SK1G00040380	MergePeak_1033	quadrant5	no	286	200	226	233	202	197	219	239	189	172	151	195	152	145	105	230	162	224	184	141	139	156	170	108	218	138	121	101	142	135	169	132	193	99	148	135	147	170	125	147	7.45	5.85	6.93	6.91	5.75	5.64
SK1G00040382	MergePeak_1034	quadrant5	no	176	166	168	183	180	176	225	180	129	134	136	198	159	116	178	246	160	220	140	140	143	126	219	132	92	124	135	115	116	128	142	96	156	99	100	106	186	117	165	138	11.05	11.7	12.42	13.07	12.35	12.15
SK1G00040387	MergePeak_1035	quadrant5	no	648	694	519	654	629	751	651	501	562	443	463	524	708	644	544	651	603	566	569	541	561	513	677	551	517	460	478	518	595	574	429	424	451	480	457	628	448	515	577	655	25.04	30.11	23.62	28.77	26.57	31.92
SK1G00040393	MergePeak_1036	quadrant5	no	548	589	377	494	547	570	457	400	487	406	372	499	501	566	508	576	754	677	424	520	528	452	635	517	552	280	269	395	491	493	445	439	419	457	354	518	502	414	448	623	30.84	37.22	24.99	31.65	33.65	35.28
SK1G00040393	MergePeak_1037	quadrant5	no	548	589	377	494	547	570	457	400	487	406	372	499	501	566	508	576	754	677	424	520	528	452	635	517	552	280	269	395	491	493	445	439	419	457	354	518	502	414	448	623	30.84	37.22	24.99	31.65	33.65	35.28
SK1G00040395	MergePeak_1038	quadrant5	no	2009	2177	1953	2358	2246	2455	2598	2102	2652	2644	2341	2573	2903	2373	2331	3231	2683	3533	3162	2859	3286	2553	3896	3294	2318	3668	3837	3840	4273	3725	3474	3482	3982	3589	4154	4153	4424	3650	4072	4122	10.7	13.02	12.25	14.3	13.08	14.38
SK1G00040395	MergePeak_1039	quadrant5	no	2009	2177	1953	2358	2246	2455	2598	2102	2652	2644	2341	2573	2903	2373	2331	3231	2683	3533	3162	2859	3286	2553	3896	3294	2318	3668	3837	3840	4273	3725	3474	3482	3982	3589	4154	4153	4424	3650	4072	4122	10.7	13.02	12.25	14.3	13.08	14.38
SK1G00040395	MergePeak_1040	quadrant5	no	2009	2177	1953	2358	2246	2455	2598	2102	2652	2644	2341	2573	2903	2373	2331	3231	2683	3533	3162	2859	3286	2553	3896	3294	2318	3668	3837	3840	4273	3725	3474	3482	3982	3589	4154	4153	4424	3650	4072	4122	10.7	13.02	12.25	14.3	13.08	14.38
SK1G00040395	MergePeak_1041	quadrant5	no	2009	2177	1953	2358	2246	2455	2598	2102	2652	2644	2341	2573	2903	2373	2331	3231	2683	3533	3162	2859	3286	2553	3896	3294	2318	3668	3837	3840	4273	3725	3474	3482	3982	3589	4154	4153	4424	3650	4072	4122	10.7	13.02	12.25	14.3	13.08	14.38
SK1G00040395	MergePeak_1042	quadrant5	no	2009	2177	1953	2358	2246	2455	2598	2102	2652	2644	2341	2573	2903	2373	2331	3231	2683	3533	3162	2859	3286	2553	3896	3294	2318	3668	3837	3840	4273	3725	3474	3482	3982	3589	4154	4153	4424	3650	4072	4122	10.7	13.02	12.25	14.3	13.08	14.38
SK1G00040395	MergePeak_1043	quadrant5	no	2009	2177	1953	2358	2246	2455	2598	2102	2652	2644	2341	2573	2903	2373	2331	3231	2683	3533	3162	2859	3286	2553	3896	3294	2318	3668	3837	3840	4273	3725	3474	3482	3982	3589	4154	4153	4424	3650	4072	4122	10.7	13.02	12.25	14.3	13.08	14.38
SK1G00040395	MergePeak_1044	quadrant5	no	2009	2177	1953	2358	2246	2455	2598	2102	2652	2644	2341	2573	2903	2373	2331	3231	2683	3533	3162	2859	3286	2553	3896	3294	2318	3668	3837	3840	4273	3725	3474	3482	3982	3589	4154	4153	4424	3650	4072	4122	10.7	13.02	12.25	14.3	13.08	14.38
SK1G00040395	MergePeak_1045	quadrant5	no	2009	2177	1953	2358	2246	2455	2598	2102	2652	2644	2341	2573	2903	2373	2331	3231	2683	3533	3162	2859	3286	2553	3896	3294	2318	3668	3837	3840	4273	3725	3474	3482	3982	3589	4154	4153	4424	3650	4072	4122	10.7	13.02	12.25	14.3	13.08	14.38
SK1G00040395	MergePeak_1046	quadrant5	no	2009	2177	1953	2358	2246	2455	2598	2102	2652	2644	2341	2573	2903	2373	2331	3231	2683	3533	3162	2859	3286	2553	3896	3294	2318	3668	3837	3840	4273	3725	3474	3482	3982	3589	4154	4153	4424	3650	4072	4122	10.7	13.02	12.25	14.3	13.08	14.38
SK1G00040395	MergePeak_1047	quadrant5	no	2009	2177	1953	2358	2246	2455	2598	2102	2652	2644	2341	2573	2903	2373	2331	3231	2683	3533	3162	2859	3286	2553	3896	3294	2318	3668	3837	3840	4273	3725	3474	3482	3982	3589	4154	4153	4424	3650	4072	4122	10.7	13.02	12.25	14.3	13.08	14.38
SK1G00040395	MergePeak_1048	quadrant5	no	2009	2177	1953	2358	2246	2455	2598	2102	2652	2644	2341	2573	2903	2373	2331	3231	2683	3533	3162	2859	3286	2553	3896	3294	2318	3668	3837	3840	4273	3725	3474	3482	3982	3589	4154	4153	4424	3650	4072	4122	10.7	13.02	12.25	14.3	13.08	14.38
SK1G00040395	MergePeak_1049	quadrant5	no	2009	2177	1953	2358	2246	2455	2598	2102	2652	2644	2341	2573	2903	2373	2331	3231	2683	3533	3162	2859	3286	2553	3896	3294	2318	3668	3837	3840	4273	3725	3474	3482	3982	3589	4154	4153	4424	3650	4072	4122	10.7	13.02	12.25	14.3	13.08	14.38
SK1G00040395	MergePeak_1050	quadrant5	no	2009	2177	1953	2358	2246	2455	2598	2102	2652	2644	2341	2573	2903	2373	2331	3231	2683	3533	3162	2859	3286	2553	3896	3294	2318	3668	3837	3840	4273	3725	3474	3482	3982	3589	4154	4153	4424	3650	4072	4122	10.7	13.02	12.25	14.3	13.08	14.38
SK1G00040395	MergePeak_1051	quadrant5	no	2009	2177	1953	2358	2246	2455	2598	2102	2652	2644	2341	2573	2903	2373	2331	3231	2683	3533	3162	2859	3286	2553	3896	3294	2318	3668	3837	3840	4273	3725	3474	3482	3982	3589	4154	4153	4424	3650	4072	4122	10.7	13.02	12.25	14.3	13.08	14.38
SK1G00040395	MergePeak_1052	quadrant5	no	2009	2177	1953	2358	2246	2455	2598	2102	2652	2644	2341	2573	2903	2373	2331	3231	2683	3533	3162	2859	3286	2553	3896	3294	2318	3668	3837	3840	4273	3725	3474	3482	3982	3589	4154	4153	4424	3650	4072	4122	10.7	13.02	12.25	14.3	13.08	14.38
SK1G00040396	MergePeak_1053	quadrant5	no	35	34	66	47	58	57	66	61	96	63	62	85	66	81	84	133	97	150	127	96	130	136	178	130	59	122	119	137	149	121	162	143	172	105	165	158	164	148	157	162	1.09	1.19	2.42	1.67	1.97	1.95
SK1G00040398	MergePeak_1054	quadrant5	no	594	655	311	404	375	302	491	491	375	426	675	721	636	366	688	824	537	697	656	446	534	459	421	516	442	370	423	543	481	369	521	417	644	311	510	434	596	594	943	523	52.13	64.55	32.15	40.36	35.98	29.15
SK1G00040398	MergePeak_1055	quadrant5	no	594	655	311	404	375	302	491	491	375	426	675	721	636	366	688	824	537	697	656	446	534	459	421	516	442	370	423	543	481	369	521	417	644	311	510	434	596	594	943	523	52.13	64.55	32.15	40.36	35.98	29.15
SK1G00040401	MergePeak_1056	quadrant5	no	387	250	379	321	345	311	354	393	327	346	285	398	405	413	339	456	351	440	367	442	342	458	502	480	584	514	443	434	543	594	490	462	510	405	481	621	544	585	646	572	17.24	12.5	19.88	16.27	16.8	15.24
SK1G00040401	MergePeak_1057	quadrant5	no	387	250	379	321	345	311	354	393	327	346	285	398	405	413	339	456	351	440	367	442	342	458	502	480	584	514	443	434	543	594	490	462	510	405	481	621	544	585	646	572	17.24	12.5	19.88	16.27	16.8	15.24
SK1G00040403	MergePeak_1058	quadrant5	no	4	1	0	1	1	0	0	3	0	0	1	0	2	0	2	2	0	0	0	3	0	1	0	2	0	0	3	1	4	1	0	0	0	0	0	1	0	0	0	0	0.56	0.16	0	0.16	0.15	0
SK1G00040406	MergePeak_1059	quadrant8	no	0	4	1	8	1	2	0	2	2	2	1	0	0	0	0	3	0	0	0	0	0	2	2	1	0	0	0	0	0	1	0	0	0	0	1	0	0	1	0	1	0	1.13	0.3	2.3	0.28	0.56
SK1G00040408	MergePeak_1060	quadrant5	no	533	216	467	400	418	546	602	324	335	314	442	481	827	746	534	700	529	504	465	879	460	498	938	562	476	348	244	424	562	441	374	539	425	568	293	556	361	395	464	378	3.73	1.7	3.85	3.19	3.2	4.21
SK1G00040408	MergePeak_1061	quadrant5	no	533	216	467	400	418	546	602	324	335	314	442	481	827	746	534	700	529	504	465	879	460	498	938	562	476	348	244	424	562	441	374	539	425	568	293	556	361	395	464	378	3.73	1.7	3.85	3.19	3.2	4.21
SK1G00040410	MergePeak_1062	quadrant5	no	1570	1218	1587	1592	1446	1341	1746	1472	1545	1411	1508	1795	1565	1362	1301	2068	1832	2011	1723	1396	1712	1749	2066	1782	1513	1974	1784	1804	1768	1839	2089	1600	2121	1496	1887	2266	2239	2242	2146	1975	53.13	46.29	63.26	61.33	53.5	49.91
SK1G00040410	MergePeak_1063	quadrant5	no	1570	1218	1587	1592	1446	1341	1746	1472	1545	1411	1508	1795	1565	1362	1301	2068	1832	2011	1723	1396	1712	1749	2066	1782	1513	1974	1784	1804	1768	1839	2089	1600	2121	1496	1887	2266	2239	2242	2146	1975	53.13	46.29	63.26	61.33	53.5	49.91
SK1G00040410	MergePeak_1064	quadrant5	no	1570	1218	1587	1592	1446	1341	1746	1472	1545	1411	1508	1795	1565	1362	1301	2068	1832	2011	1723	1396	1712	1749	2066	1782	1513	1974	1784	1804	1768	1839	2089	1600	2121	1496	1887	2266	2239	2242	2146	1975	53.13	46.29	63.26	61.33	53.5	49.91
SK1G00040411	MergePeak_1065	quadrant5	no	60	68	83	69	80	78	98	80	65	73	51	65	95	137	77	167	106	62	88	96	100	132	84	87	44	67	80	81	81	77	69	63	82	57	47	111	97	81	80	51	3.15	4	5.13	4.12	4.59	4.5
SK1G00040411	MergePeak_1066	quadrant5	no	60	68	83	69	80	78	98	80	65	73	51	65	95	137	77	167	106	62	88	96	100	132	84	87	44	67	80	81	81	77	69	63	82	57	47	111	97	81	80	51	3.15	4	5.13	4.12	4.59	4.5
SK1G00040413	MergePeak_1067	quadrant5	no	7	12	7	11	7	5	12	8	2	6	8	15	7	3	10	16	9	16	5	4	9	12	5	7	4	2	8	4	5	2	6	4	11	3	3	4	5	4	8	3	1.26	2.43	1.48	2.26	1.38	0.99
SK1G00040414	MergePeak_1068	quadrant8	no	73	36	24	27	30	22	29	13	10	8	23	13	10	8	3	20	13	21	6	4	8	5	15	5	5	5	2	9	6	1	3	9	9	2	14	2	5	8	12	8	14.13	7.82	5.47	5.95	6.35	4.68
SK1G00040416	MergePeak_1069	quadrant5	no	12	5	15	5	8	13	7	8	5	2	3	5	14	5	29	7	5	7	1	9	19	5	11	2	7	9	17	8	2	3	7	8	5	6	3	2	3	5	14	6	2.2	1.03	3.24	1.04	1.6	2.62
SK1G00040418	MergePeak_1070	quadrant5	no	1279	1160	1095	1109	1201	1159	1358	1117	1216	1175	1226	1419	1384	1357	1323	1750	1512	1696	1449	1557	1362	1457	1818	1499	1561	1528	1360	1317	1770	1706	1497	1437	1687	1502	1555	1834	1731	1738	1936	1881	38.1	38.8	38.42	37.6	39.11	37.97
SK1G00040418	MergePeak_1071	quadrant5	no	1279	1160	1095	1109	1201	1159	1358	1117	1216	1175	1226	1419	1384	1357	1323	1750	1512	1696	1449	1557	1362	1457	1818	1499	1561	1528	1360	1317	1770	1706	1497	1437	1687	1502	1555	1834	1731	1738	1936	1881	38.1	38.8	38.42	37.6	39.11	37.97
SK1G00040424	MergePeak_1072	quadrant5	no	135	102	140	93	123	72	89	107	140	125	97	157	165	128	115	181	169	144	105	169	116	184	247	258	317	306	213	200	245	255	288	207	353	209	276	260	271	332	334	263	3.59	3.05	4.39	2.82	3.58	2.11
SK1G00040425	MergePeak_1072	quadrant5	no	0	0	0	0	1	0	0	0	0	0	3	0	0	0	0	0	0	0	0	2	0	0	0	0	0	0	0	0	0	0	0	0	0	0	1	0	0	0	0	0	0	0	0	0	0.03	0
SK1G00040430	MergePeak_1073	quadrant5	no	46	25	45	33	48	36	39	61	36	33	27	44	88	57	42	62	72	58	57	59	82	82	106	141	94	108	106	93	109	109	146	108	107	111	153	139	133	137	151	125	1.51	0.92	1.74	1.23	1.72	1.3
SK1G00040430	MergePeak_1074	quadrant5	no	46	25	45	33	48	36	39	61	36	33	27	44	88	57	42	62	72	58	57	59	82	82	106	141	94	108	106	93	109	109	146	108	107	111	153	139	133	137	151	125	1.51	0.92	1.74	1.23	1.72	1.3
SK1G00040431	MergePeak_1075	quadrant5	no	6	4	1	0	4	6	5	8	1	2	2	5	4	3	2	6	4	16	6	8	3	3	6	6	3	5	5	6	6	5	14	2	3	3	5	7	3	1	9	3	0.85	0.63	0.17	0	0.62	0.93
SK1G00040432	MergePeak_1076	quadrant2	no	2	3	2	3	5	6	3	13	8	1	6	15	17	12	7	12	13	15	17	4	13	5	10	22	8	34	12	19	23	17	5	21	16	6	15	25	17	18	27	10	0.11	0.19	0.13	0.2	0.31	0.38
SK1G00040434	MergePeak_1077	quadrant5	no	243	181	207	243	234	217	250	229	176	191	153	203	204	200	177	247	256	145	143	197	165	125	195	106	87	111	113	114	100	146	109	126	101	120	93	112	148	74	136	120	12.34	10.32	12.38	14.04	12.99	12.12
SK1G00040434	MergePeak_1078	quadrant5	no	243	181	207	243	234	217	250	229	176	191	153	203	204	200	177	247	256	145	143	197	165	125	195	106	87	111	113	114	100	146	109	126	101	120	93	112	148	74	136	120	12.34	10.32	12.38	14.04	12.99	12.12
SK1G00040436	MergePeak_1079	quadrant5	no	393	475	308	543	357	430	542	357	238	296	455	319	336	290	386	459	382	400	437	296	423	327	540	249	184	452	455	298	256	226	367	283	313	173	318	286	339	362	227	281	13.99	18.98	12.91	22	13.89	16.83
SK1G00040436	MergePeak_1080	quadrant5	no	393	475	308	543	357	430	542	357	238	296	455	319	336	290	386	459	382	400	437	296	423	327	540	249	184	452	455	298	256	226	367	283	313	173	318	286	339	362	227	281	13.99	18.98	12.91	22	13.89	16.83
SK1G00040438	MergePeak_1081	quadrant5	no	2031	1650	1598	1588	1537	1544	1664	1431	1341	1423	1221	1457	1493	1310	1201	1669	1423	1433	1283	1275	1159	1088	1300	1091	946	1061	1023	999	1240	1300	1073	1092	1283	1145	1155	1266	1331	1454	1346	1317	35.24	32.15	32.66	31.36	29.15	29.46
SK1G00040438	MergePeak_1082	quadrant5	no	2031	1650	1598	1588	1537	1544	1664	1431	1341	1423	1221	1457	1493	1310	1201	1669	1423	1433	1283	1275	1159	1088	1300	1091	946	1061	1023	999	1240	1300	1073	1092	1283	1145	1155	1266	1331	1454	1346	1317	35.24	32.15	32.66	31.36	29.15	29.46
SK1G00040438	MergePeak_1083	quadrant5	no	2031	1650	1598	1588	1537	1544	1664	1431	1341	1423	1221	1457	1493	1310	1201	1669	1423	1433	1283	1275	1159	1088	1300	1091	946	1061	1023	999	1240	1300	1073	1092	1283	1145	1155	1266	1331	1454	1346	1317	35.24	32.15	32.66	31.36	29.15	29.46
SK1G00040439	MergePeak_1084	quadrant5	no	156	170	111	117	143	157	126	122	140	137	102	132	133	123	124	193	205	239	167	154	134	178	195	194	180	164	123	143	203	217	216	167	228	208	282	266	197	293	257	250	6.99	8.56	5.86	5.97	7.01	7.74
SK1G00040452	MergePeak_1085	quadrant5	no	3518	3953	3233	3519	3529	3854	4103	3463	4391	3648	4236	4609	5806	4878	4907	5482	5024	5875	4653	5590	5267	5710	7016	5736	3696	6083	5765	5234	5802	5508	5088	4802	5841	5364	5260	6292	6068	6294	6690	7037	220.36	278.03	238.51	250.89	241.63	265.5
SK1G00040452	MergePeak_1086	quadrant5	no	3518	3953	3233	3519	3529	3854	4103	3463	4391	3648	4236	4609	5806	4878	4907	5482	5024	5875	4653	5590	5267	5710	7016	5736	3696	6083	5765	5234	5802	5508	5088	4802	5841	5364	5260	6292	6068	6294	6690	7037	220.36	278.03	238.51	250.89	241.63	265.5
SK1G00040453	MergePeak_1087	quadrant5	no	404	330	327	311	340	341	299	253	259	290	234	319	332	289	213	458	373	506	356	254	330	292	422	404	363	267	299	234	435	389	354	305	433	329	436	446	429	459	432	445	8.72	7.99	8.31	7.64	8.02	8.09
SK1G00040453	MergePeak_1088	quadrant5	no	404	330	327	311	340	341	299	253	259	290	234	319	332	289	213	458	373	506	356	254	330	292	422	404	363	267	299	234	435	389	354	305	433	329	436	446	429	459	432	445	8.72	7.99	8.31	7.64	8.02	8.09
SK1G00040454	MergePeak_1089	quadrant5	no	144	190	144	131	160	144	134	142	174	131	141	139	183	191	143	183	188	221	193	182	160	191	292	211	224	203	176	198	213	255	211	205	243	178	241	244	300	231	297	234	5.19	7.69	6.11	5.37	6.3	5.7
SK1G00040454	MergePeak_1090	quadrant5	no	144	190	144	131	160	144	134	142	174	131	141	139	183	191	143	183	188	221	193	182	160	191	292	211	224	203	176	198	213	255	211	205	243	178	241	244	300	231	297	234	5.19	7.69	6.11	5.37	6.3	5.7
SK1G00040455	MergePeak_1091	quadrant5	no	583	410	991	916	846	937	1353	1197	1780	1385	1024	1777	1552	1391	1370	1648	1199	1651	1261	1650	1415	1087	1102	848	893	1164	1107	1138	1167	1250	1285	988	1059	1161	1052	1313	1175	1012	1077	851	11.45	9.04	23.23	20.71	18.29	20.48
SK1G00040455	MergePeak_1092	quadrant5	no	583	410	991	916	846	937	1353	1197	1780	1385	1024	1777	1552	1391	1370	1648	1199	1651	1261	1650	1415	1087	1102	848	893	1164	1107	1138	1167	1250	1285	988	1059	1161	1052	1313	1175	1012	1077	851	11.45	9.04	23.23	20.71	18.29	20.48
SK1G00040455	MergePeak_1093	quadrant5	no	583	410	991	916	846	937	1353	1197	1780	1385	1024	1777	1552	1391	1370	1648	1199	1651	1261	1650	1415	1087	1102	848	893	1164	1107	1138	1167	1250	1285	988	1059	1161	1052	1313	1175	1012	1077	851	11.45	9.04	23.23	20.71	18.29	20.48
SK1G00040455	MergePeak_1094	quadrant5	no	583	410	991	916	846	937	1353	1197	1780	1385	1024	1777	1552	1391	1370	1648	1199	1651	1261	1650	1415	1087	1102	848	893	1164	1107	1138	1167	1250	1285	988	1059	1161	1052	1313	1175	1012	1077	851	11.45	9.04	23.23	20.71	18.29	20.48
SK1G00040455	MergePeak_1095	quadrant5	no	583	410	991	916	846	937	1353	1197	1780	1385	1024	1777	1552	1391	1370	1648	1199	1651	1261	1650	1415	1087	1102	848	893	1164	1107	1138	1167	1250	1285	988	1059	1161	1052	1313	1175	1012	1077	851	11.45	9.04	23.23	20.71	18.29	20.48
SK1G00040456	MergePeak_1096	quadrant5	no	204	190	206	239	246	226	287	204	287	262	278	279	318	272	255	325	257	415	394	326	374	314	386	355	463	397	470	429	419	471	430	416	486	336	433	473	483	487	504	419	4.22	4.41	5.02	5.63	5.56	5.14
SK1G00040456	MergePeak_1097	quadrant5	no	204	190	206	239	246	226	287	204	287	262	278	279	318	272	255	325	257	415	394	326	374	314	386	355	463	397	470	429	419	471	430	416	486	336	433	473	483	487	504	419	4.22	4.41	5.02	5.63	5.56	5.14
SK1G00040456	MergePeak_1098	quadrant5	no	204	190	206	239	246	226	287	204	287	262	278	279	318	272	255	325	257	415	394	326	374	314	386	355	463	397	470	429	419	471	430	416	486	336	433	473	483	487	504	419	4.22	4.41	5.02	5.63	5.56	5.14
SK1G00040457	MergePeak_1099	quadrant7	yes	13	7	9	5	1	2	5	10	2	2	5	5	1	1	1	4	3	1	0	3	1	2	8	0	1	4	3	0	5	1	5	2	2	0	2	3	2	0	12	6	2.4	1.45	1.96	1.05	0.2	0.41
SK1G00040458	MergePeak_1100	quadrant5	no	65	51	47	56	82	56	52	48	57	63	59	58	96	84	70	68	91	87	79	97	81	72	122	111	118	104	74	83	102	125	106	69	96	94	109	115	104	118	116	94	4.8	4.23	4.08	4.7	6.61	4.54
SK1G00040458	MergePeak_1101	quadrant5	no	65	51	47	56	82	56	52	48	57	63	59	58	96	84	70	68	91	87	79	97	81	72	122	111	118	104	74	83	102	125	106	69	96	94	109	115	104	118	116	94	4.8	4.23	4.08	4.7	6.61	4.54
SK1G00040459	MergePeak_1102	quadrant4	no	317	292	272	300	321	338	379	334	274	324	305	295	354	371	333	470	411	467	389	440	442	398	565	566	520	544	512	508	535	473	510	451	614	482	503	616	501	558	558	639	13.26	13.71	13.4	14.28	14.67	15.54
SK1G00040459	MergePeak_1103	quadrant5	no	317	292	272	300	321	338	379	334	274	324	305	295	354	371	333	470	411	467	389	440	442	398	565	566	520	544	512	508	535	473	510	451	614	482	503	616	501	558	558	639	13.26	13.71	13.4	14.28	14.67	15.54
SK1G00040461	MergePeak_1104	quadrant5	no	3089	1999	2589	3588	2962	3263	4786	3432	2944	2826	2917	4088	3443	2413	3803	4481	3571	3696	3453	3538	3996	3001	2911	2252	1164	2635	2433	2598	2106	2155	2605	2370	2379	2349	2010	2490	2766	2497	2633	2224	98.23	71.38	96.96	129.87	102.96	114.12
SK1G00040461	MergePeak_1105	quadrant5	no	3089	1999	2589	3588	2962	3263	4786	3432	2944	2826	2917	4088	3443	2413	3803	4481	3571	3696	3453	3538	3996	3001	2911	2252	1164	2635	2433	2598	2106	2155	2605	2370	2379	2349	2010	2490	2766	2497	2633	2224	98.23	71.38	96.96	129.87	102.96	114.12
SK1G00040465	MergePeak_1106	quadrant5	no	622	705	591	591	680	623	652	576	745	651	625	765	922	786	777	1016	951	1213	919	967	1010	1001	1337	1203	1014	1101	1005	1063	1189	1298	1448	1156	1485	1032	1231	1426	1479	1464	1511	1461	30.79	39.02	36.03	33.85	39.61	36.59
SK1G00040465	MergePeak_1107	quadrant5	no	622	705	591	591	680	623	652	576	745	651	625	765	922	786	777	1016	951	1213	919	967	1010	1001	1337	1203	1014	1101	1005	1063	1189	1298	1448	1156	1485	1032	1231	1426	1479	1464	1511	1461	30.79	39.02	36.03	33.85	39.61	36.59
SK1G00040466	MergePeak_1108	quadrant8	no	361	386	361	452	449	471	565	477	499	502	414	434	375	289	388	505	456	430	292	253	255	270	198	135	102	103	172	98	152	235	178	205	167	213	139	172	199	141	193	287	14.72	17.67	17.34	20.98	20.01	21.12
SK1G00040466	MergePeak_1109	quadrant8	no	361	386	361	452	449	471	565	477	499	502	414	434	375	289	388	505	456	430	292	253	255	270	198	135	102	103	172	98	152	235	178	205	167	213	139	172	199	141	193	287	14.72	17.67	17.34	20.98	20.01	21.12
SK1G00040469	MergePeak_1110	quadrant5	no	33	21	64	49	53	48	83	52	24	25	20	33	41	67	23	55	51	26	31	37	30	34	21	41	21	31	29	22	27	31	16	19	14	25	17	17	18	26	7	25	1	0.72	2.29	1.69	1.76	1.6
SK1G00040470	MergePeak_1111	quadrant5	no	363	272	276	274	317	261	381	250	286	282	268	290	309	215	283	364	285	343	295	302	307	215	366	278	350	260	304	298	333	295	272	236	327	279	320	274	282	300	360	348	35.13	29.56	31.46	30.19	33.54	27.78
SK1G00040471	MergePeak_1112	quadrant5	no	234	216	141	226	184	154	223	172	153	131	212	168	202	202	176	196	289	244	295	155	335	270	247	394	169	331	281	328	260	245	433	271	321	144	198	212	294	488	210	310	8.01	8.3	5.69	8.81	6.89	5.8
SK1G00040471	MergePeak_1113	quadrant6	no	234	216	141	226	184	154	223	172	153	131	212	168	202	202	176	196	289	244	295	155	335	270	247	394	169	331	281	328	260	245	433	271	321	144	198	212	294	488	210	310	8.01	8.3	5.69	8.81	6.89	5.8
SK1G00040471	MergePeak_1114	quadrant5	no	234	216	141	226	184	154	223	172	153	131	212	168	202	202	176	196	289	244	295	155	335	270	247	394	169	331	281	328	260	245	433	271	321	144	198	212	294	488	210	310	8.01	8.3	5.69	8.81	6.89	5.8
SK1G00040471	MergePeak_1115	quadrant5	no	234	216	141	226	184	154	223	172	153	131	212	168	202	202	176	196	289	244	295	155	335	270	247	394	169	331	281	328	260	245	433	271	321	144	198	212	294	488	210	310	8.01	8.3	5.69	8.81	6.89	5.8
SK1G00040473	MergePeak_1116	quadrant5	no	770	607	642	779	730	797	934	799	924	897	954	1086	1165	1043	968	1239	1099	1288	1144	1268	1235	1192	1403	1518	1187	1603	1372	1318	1462	1509	1419	1327	1434	1313	1460	1772	1744	1808	1558	1621	37.06	32.81	36.39	42.68	38.41	42.19
SK1G00040473	MergePeak_1117	quadrant5	no	770	607	642	779	730	797	934	799	924	897	954	1086	1165	1043	968	1239	1099	1288	1144	1268	1235	1192	1403	1518	1187	1603	1372	1318	1462	1509	1419	1327	1434	1313	1460	1772	1744	1808	1558	1621	37.06	32.81	36.39	42.68	38.41	42.19
SK1G00040474	MergePeak_1118	quadrant5	no	462	476	384	460	458	437	483	386	363	347	281	337	406	343	361	419	419	331	305	343	310	302	393	334	331	317	302	295	319	361	242	240	290	248	268	351	269	391	330	398	9.25	10.7	9.05	10.48	10.02	9.62
SK1G00040477	MergePeak_1119	quadrant5	no	2682	2104	2602	2733	2915	2788	3422	2746	3203	3257	2730	3845	3620	3154	2997	4463	3836	4142	3652	3969	3679	3611	4251	3652	3710	3817	3578	3516	4069	4241	4014	3869	4384	3748	3883	4816	4652	4515	4723	4321	37.16	32.73	42.45	43.08	44.13	42.46
SK1G00040477	MergePeak_1120	quadrant5	no	2682	2104	2602	2733	2915	2788	3422	2746	3203	3257	2730	3845	3620	3154	2997	4463	3836	4142	3652	3969	3679	3611	4251	3652	3710	3817	3578	3516	4069	4241	4014	3869	4384	3748	3883	4816	4652	4515	4723	4321	37.16	32.73	42.45	43.08	44.13	42.46
SK1G00040477	MergePeak_1121	quadrant5	no	2682	2104	2602	2733	2915	2788	3422	2746	3203	3257	2730	3845	3620	3154	2997	4463	3836	4142	3652	3969	3679	3611	4251	3652	3710	3817	3578	3516	4069	4241	4014	3869	4384	3748	3883	4816	4652	4515	4723	4321	37.16	32.73	42.45	43.08	44.13	42.46
SK1G00040477	MergePeak_1122	quadrant5	no	2682	2104	2602	2733	2915	2788	3422	2746	3203	3257	2730	3845	3620	3154	2997	4463	3836	4142	3652	3969	3679	3611	4251	3652	3710	3817	3578	3516	4069	4241	4014	3869	4384	3748	3883	4816	4652	4515	4723	4321	37.16	32.73	42.45	43.08	44.13	42.46
SK1G00040482	MergePeak_1123	quadrant5	no	706	653	809	1317	1246	1657	2024	1677	1596	1779	1670	1618	2042	2501	1566	2392	2005	2003	2061	2422	1864	2057	1794	1944	1484	1475	1310	1514	1925	1606	1597	1692	1872	1582	1183	2486	1963	1535	1613	1614	12.28	12.75	16.57	26.07	23.69	31.69
SK1G00040482	MergePeak_1124	quadrant5	no	706	653	809	1317	1246	1657	2024	1677	1596	1779	1670	1618	2042	2501	1566	2392	2005	2003	2061	2422	1864	2057	1794	1944	1484	1475	1310	1514	1925	1606	1597	1692	1872	1582	1183	2486	1963	1535	1613	1614	12.28	12.75	16.57	26.07	23.69	31.69
SK1G00040483	MergePeak_1125	quadrant5	no	752	621	635	714	663	764	735	626	722	718	709	728	869	720	748	955	830	987	835	825	864	841	1391	1195	1184	1328	1144	1067	1242	1266	1149	980	1292	936	1237	1355	1420	1546	1491	1421	21.89	20.29	21.77	23.65	21.09	24.45
SK1G00040483	MergePeak_1126	quadrant5	no	752	621	635	714	663	764	735	626	722	718	709	728	869	720	748	955	830	987	835	825	864	841	1391	1195	1184	1328	1144	1067	1242	1266	1149	980	1292	936	1237	1355	1420	1546	1491	1421	21.89	20.29	21.77	23.65	21.09	24.45
SK1G00040483	MergePeak_1127	quadrant5	no	752	621	635	714	663	764	735	626	722	718	709	728	869	720	748	955	830	987	835	825	864	841	1391	1195	1184	1328	1144	1067	1242	1266	1149	980	1292	936	1237	1355	1420	1546	1491	1421	21.89	20.29	21.77	23.65	21.09	24.45
SK1G00040488	MergePeak_1128	quadrant5	no	69	29	58	28	63	27	49	42	38	26	19	39	64	145	83	111	76	73	86	61	44	100	131	141	78	48	33	47	202	72	74	95	102	139	52	145	103	60	71	59	5.87	2.77	5.81	2.71	5.85	2.52
SK1G00040489	MergePeak_1129	quadrant5	no	66	51	44	63	75	52	53	44	52	68	65	77	76	60	57	68	71	91	68	76	63	79	117	90	98	133	70	103	113	124	86	97	117	78	107	114	101	93	111	109	3.16	2.75	2.48	3.44	3.93	2.74
SK1G00040489	MergePeak_1130	quadrant5	no	66	51	44	63	75	52	53	44	52	68	65	77	76	60	57	68	71	91	68	76	63	79	117	90	98	133	70	103	113	124	86	97	117	78	107	114	101	93	111	109	3.16	2.75	2.48	3.44	3.93	2.74
SK1G00040490	MergePeak_1131	quadrant5	no	505	482	527	521	561	538	582	549	563	494	505	650	537	492	553	799	609	702	556	651	590	512	658	535	478	465	392	494	611	668	537	556	621	510	558	767	556	518	631	565	8.08	8.66	9.93	9.49	9.81	9.47
SK1G00040490	MergePeak_1132	quadrant5	no	505	482	527	521	561	538	582	549	563	494	505	650	537	492	553	799	609	702	556	651	590	512	658	535	478	465	392	494	611	668	537	556	621	510	558	767	556	518	631	565	8.08	8.66	9.93	9.49	9.81	9.47
SK1G00040492	MergePeak_1133	quadrant5	no	23	34	26	50	61	44	47	41	51	95	49	70	46	40	71	71	68	69	91	33	78	64	38	42	40	49	35	58	41	42	57	29	42	63	29	62	78	38	32	24	0.47	0.78	0.62	1.16	1.36	0.99
SK1G00040493	MergePeak_1134	quadrant5	no	882	1323	687	1991	1609	2317	2203	2067	1647	1244	2184	1849	2558	1782	2860	2102	2539	2257	2609	1848	3105	1898	2005	1635	1406	2455	2222	1578	1447	1731	1521	1267	1137	1299	1149	1301	1938	1841	1307	1898	31.02	52.24	28.45	79.69	61.85	89.61
SK1G00040493	MergePeak_1135	quadrant5	no	882	1323	687	1991	1609	2317	2203	2067	1647	1244	2184	1849	2558	1782	2860	2102	2539	2257	2609	1848	3105	1898	2005	1635	1406	2455	2222	1578	1447	1731	1521	1267	1137	1299	1149	1301	1938	1841	1307	1898	31.02	52.24	28.45	79.69	61.85	89.61
SK1G00040494	MergePeak_1136	quadrant5	no	870	788	882	830	893	959	1186	985	1030	982	993	1193	1317	1262	1072	1446	1278	1623	1505	1415	1499	1354	1885	2166	1697	2436	2370	1789	1783	2145	2215	1930	2283	1737	2255	2448	2190	2727	2221	2367	14.18	14.42	16.93	15.4	15.91	17.19
SK1G00040494	MergePeak_1137	quadrant5	no	870	788	882	830	893	959	1186	985	1030	982	993	1193	1317	1262	1072	1446	1278	1623	1505	1415	1499	1354	1885	2166	1697	2436	2370	1789	1783	2145	2215	1930	2283	1737	2255	2448	2190	2727	2221	2367	14.18	14.42	16.93	15.4	15.91	17.19
SK1G00040494	MergePeak_1138	quadrant5	no	870	788	882	830	893	959	1186	985	1030	982	993	1193	1317	1262	1072	1446	1278	1623	1505	1415	1499	1354	1885	2166	1697	2436	2370	1789	1783	2145	2215	1930	2283	1737	2255	2448	2190	2727	2221	2367	14.18	14.42	16.93	15.4	15.91	17.19
SK1G00040496	MergePeak_1139	quadrant5	no	529	425	418	431	468	370	514	408	285	281	308	389	275	194	293	464	370	366	329	358	298	265	385	220	235	193	224	254	191	222	219	201	251	216	221	252	218	221	281	284	72.56	65.46	67.53	67.29	70.17	55.82
SK1G00040497	MergePeak_1140	quadrant5	no	400	373	346	379	399	420	492	424	315	280	391	418	561	635	463	616	499	526	586	574	458	503	515	463	496	382	362	374	498	487	476	423	548	434	414	674	514	537	465	476	9.59	10.04	9.77	10.35	10.46	11.08
SK1G00040497	MergePeak_1141	quadrant5	no	400	373	346	379	399	420	492	424	315	280	391	418	561	635	463	616	499	526	586	574	458	503	515	463	496	382	362	374	498	487	476	423	548	434	414	674	514	537	465	476	9.59	10.04	9.77	10.35	10.46	11.08
SK1G00040500	MergePeak_1142	quadrant5	no	35	63	49	41	40	45	69	44	71	48	39	40	40	41	69	64	67	71	52	72	76	38	73	56	44	67	94	51	72	67	38	71	97	41	62	72	65	65	81	86	2.52	5.09	4.15	3.36	3.14	3.56
SK1G00040502	MergePeak_1143	quadrant5	no	380	315	324	280	354	261	325	315	316	375	252	415	415	406	324	574	448	566	419	407	461	421	609	520	454	423	449	404	516	491	517	524	557	476	590	682	581	572	605	471	8.71	8.1	8.74	7.3	8.87	6.58
SK1G00040502	MergePeak_1144	quadrant5	no	380	315	324	280	354	261	325	315	316	375	252	415	415	406	324	574	448	566	419	407	461	421	609	520	454	423	449	404	516	491	517	524	557	476	590	682	581	572	605	471	8.71	8.1	8.74	7.3	8.87	6.58
SK1G00040502	MergePeak_1145	quadrant5	no	380	315	324	280	354	261	325	315	316	375	252	415	415	406	324	574	448	566	419	407	461	421	609	520	454	423	449	404	516	491	517	524	557	476	590	682	581	572	605	471	8.71	8.1	8.74	7.3	8.87	6.58
SK1G00040504	MergePeak_1146	quadrant3	no	13	4	7	17	21	32	21	42	20	12	54	51	81	44	83	52	68	75	51	32	76	60	59	77	53	75	73	66	35	28	32	24	26	31	48	38	47	48	41	60	0.5	0.17	0.32	0.75	0.89	1.36
SK1G00040505	MergePeak_1147	quadrant5	no	1358	1141	1292	1345	1399	1337	1434	1235	1309	1453	1342	1743	1766	1516	1357	2053	1814	2190	1755	1805	1753	1660	2530	2359	2105	2348	2193	2172	2411	2516	2270	2090	2517	2095	2483	2729	2555	2915	3101	2854	20.48	19.32	22.94	23.08	23.06	22.17
SK1G00040505	MergePeak_1148	quadrant5	no	1358	1141	1292	1345	1399	1337	1434	1235	1309	1453	1342	1743	1766	1516	1357	2053	1814	2190	1755	1805	1753	1660	2530	2359	2105	2348	2193	2172	2411	2516	2270	2090	2517	2095	2483	2729	2555	2915	3101	2854	20.48	19.32	22.94	23.08	23.06	22.17
SK1G00040506	MergePeak_1149	quadrant5	no	901	708	795	712	817	730	982	816	899	926	1003	1219	1317	1098	1028	1497	1174	1546	1529	1351	1555	1542	1602	1802	1560	1662	1506	1587	1630	1782	2137	1794	2178	1503	1766	2171	2050	1910	2222	1804	15.55	13.72	16.16	13.98	15.41	13.85
SK1G00040506	MergePeak_1150	quadrant5	no	901	708	795	712	817	730	982	816	899	926	1003	1219	1317	1098	1028	1497	1174	1546	1529	1351	1555	1542	1602	1802	1560	1662	1506	1587	1630	1782	2137	1794	2178	1503	1766	2171	2050	1910	2222	1804	15.55	13.72	16.16	13.98	15.41	13.85
SK1G00040507	MergePeak_1151	quadrant5	no	2603	2055	2043	2255	2045	2071	1958	1636	1530	1578	1319	1459	1635	1588	1427	2183	1888	1981	1563	1583	1538	1525	1772	1689	1333	1440	1333	1355	1675	1535	1497	1349	2018	1118	1475	1884	1756	2049	1895	1765	47.14	41.79	43.58	46.48	40.48	41.25
SK1G00040507	MergePeak_1152	quadrant5	no	2603	2055	2043	2255	2045	2071	1958	1636	1530	1578	1319	1459	1635	1588	1427	2183	1888	1981	1563	1583	1538	1525	1772	1689	1333	1440	1333	1355	1675	1535	1497	1349	2018	1118	1475	1884	1756	2049	1895	1765	47.14	41.79	43.58	46.48	40.48	41.25
SK1G00040512	MergePeak_1153	quadrant5	no	483	272	422	590	574	569	857	638	411	488	586	644	411	445	595	722	674	654	683	462	814	437	390	443	393	528	434	419	312	329	608	381	504	273	373	433	429	461	215	340	29.14	18.43	29.98	40.51	37.85	37.75
SK1G00040512	MergePeak_1154	quadrant5	no	483	272	422	590	574	569	857	638	411	488	586	644	411	445	595	722	674	654	683	462	814	437	390	443	393	528	434	419	312	329	608	381	504	273	373	433	429	461	215	340	29.14	18.43	29.98	40.51	37.85	37.75
SK1G00040513	MergePeak_1155	quadrant5	no	31104	29275	20024	23076	23684	25019	23572	20405	21735	21429	22302	24858	22339	18363	19759	30103	28776	31462	23857	21729	24655	24190	29298	22682	25375	19598	20088	21016	31854	26897	24904	23459	28776	23112	30788	30269	24374	29611	30895	34150	3001.09	3171.7	2275.46	2534.29	2497.98	2654.86
SK1G00040513	MergePeak_1156	quadrant5	no	31104	29275	20024	23076	23684	25019	23572	20405	21735	21429	22302	24858	22339	18363	19759	30103	28776	31462	23857	21729	24655	24190	29298	22682	25375	19598	20088	21016	31854	26897	24904	23459	28776	23112	30788	30269	24374	29611	30895	34150	3001.09	3171.7	2275.46	2534.29	2497.98	2654.86
SK1G00040514	MergePeak_1156	quadrant5	no	338	276	357	336	346	282	395	311	328	301	334	416	458	344	351	485	429	461	419	430	398	410	605	571	530	632	587	470	595	666	614	558	642	483	658	664	701	710	765	642	8.29	7.6	10.31	9.38	9.27	7.61
SK1G00040514	MergePeak_1157	quadrant5	no	338	276	357	336	346	282	395	311	328	301	334	416	458	344	351	485	429	461	419	430	398	410	605	571	530	632	587	470	595	666	614	558	642	483	658	664	701	710	765	642	8.29	7.6	10.31	9.38	9.27	7.61
SK1G00040517	MergePeak_1158	quadrant5	no	173	161	158	134	149	166	155	160	145	129	100	185	175	146	144	175	203	185	145	174	139	165	212	197	182	148	139	217	226	202	184	205	211	156	181	199	204	200	247	225	4.82	5.04	5.19	4.25	4.54	5.09
SK1G00040518	MergePeak_1159	quadrant5	no	216	252	180	291	252	322	380	302	293	295	341	338	498	446	423	472	354	567	512	455	468	397	665	588	326	603	527	498	560	470	563	460	605	435	435	660	624	681	617	539	6.5	8.52	6.38	9.97	8.29	10.66
SK1G00040518	MergePeak_1160	quadrant5	no	216	252	180	291	252	322	380	302	293	295	341	338	498	446	423	472	354	567	512	455	468	397	665	588	326	603	527	498	560	470	563	460	605	435	435	660	624	681	617	539	6.5	8.52	6.38	9.97	8.29	10.66
SK1G00040521	MergePeak_1161	quadrant5	no	989	811	970	1027	962	914	1102	916	995	980	961	1072	1184	1185	1056	1404	1175	1473	1228	1358	1169	1315	1669	1725	1455	1554	1669	1456	1641	1787	1723	1428	1743	1401	1772	1942	1757	2039	1959	1747	30.07	27.68	34.73	35.54	31.97	30.56
SK1G00040521	MergePeak_1162	quadrant5	no	989	811	970	1027	962	914	1102	916	995	980	961	1072	1184	1185	1056	1404	1175	1473	1228	1358	1169	1315	1669	1725	1455	1554	1669	1456	1641	1787	1723	1428	1743	1401	1772	1942	1757	2039	1959	1747	30.07	27.68	34.73	35.54	31.97	30.56
SK1G00040522	MergePeak_1163	quadrant5	no	1261	953	1095	1030	995	992	1336	1033	1137	1177	981	1282	1250	993	1088	1498	1309	1562	1317	1393	1180	1134	1528	1522	1586	1956	1734	1308	1495	1703	1383	1314	1745	1245	1812	1775	1693	2105	1930	1869	15.21	12.9	15.55	14.14	13.12	13.16
SK1G00040523	MergePeak_1164	quadrant5	no	1999	1664	1924	1792	1970	1867	1887	1685	1739	1784	1848	2179	2417	2328	1943	2690	2512	2904	2498	2581	2596	2448	3617	3264	2896	3168	2920	2616	3403	3234	3144	2802	3687	2888	3479	4066	3427	4042	3846	3804	43.32	40.5	49.11	44.21	46.67	44.5
SK1G00040523	MergePeak_1165	quadrant5	no	1999	1664	1924	1792	1970	1867	1887	1685	1739	1784	1848	2179	2417	2328	1943	2690	2512	2904	2498	2581	2596	2448	3617	3264	2896	3168	2920	2616	3403	3234	3144	2802	3687	2888	3479	4066	3427	4042	3846	3804	43.32	40.5	49.11	44.21	46.67	44.5
SK1G00040525	MergePeak_1166	quadrant5	no	121	108	96	136	137	138	189	167	118	122	165	174	149	131	135	239	190	200	186	169	180	151	162	138	113	173	157	126	165	152	134	146	204	132	151	158	160	141	202	151	9.71	9.74	9.08	12.43	12.02	12.18
SK1G00040526	MergePeak_1167	quadrant5	no	280	195	309	219	253	233	274	240	224	248	245	303	284	296	233	391	320	338	277	293	306	347	412	507	382	405	383	368	432	461	416	377	465	371	440	494	436	522	497	461	15.76	12.32	20.48	14.03	15.57	14.42
SK1G00040526	MergePeak_1168	quadrant5	no	280	195	309	219	253	233	274	240	224	248	245	303	284	296	233	391	320	338	277	293	306	347	412	507	382	405	383	368	432	461	416	377	465	371	440	494	436	522	497	461	15.76	12.32	20.48	14.03	15.57	14.42
SK1G00040530	MergePeak_1169	quadrant5	no	1441	1318	1620	1679	1687	1525	1868	1598	2243	2222	2188	2526	2739	2211	2148	3191	2696	3360	2625	2860	2828	2709	3057	2718	2396	2776	2679	2906	2970	3264	3462	2854	3402	3022	2989	3950	3644	3430	3557	3080	23.09	23.72	30.58	30.63	29.56	26.88
SK1G00040530	MergePeak_1170	quadrant5	no	1441	1318	1620	1679	1687	1525	1868	1598	2243	2222	2188	2526	2739	2211	2148	3191	2696	3360	2625	2860	2828	2709	3057	2718	2396	2776	2679	2906	2970	3264	3462	2854	3402	3022	2989	3950	3644	3430	3557	3080	23.09	23.72	30.58	30.63	29.56	26.88
SK1G00040531	MergePeak_1171	quadrant5	no	89	81	69	75	73	75	73	74	82	77	84	89	76	65	62	93	88	109	78	83	84	72	112	91	94	96	97	92	102	113	103	85	134	118	95	146	90	124	107	109	9.26	9.47	8.46	8.89	8.31	8.59
SK1G00040533	MergePeak_1172	quadrant5	no	50	31	86	55	40	54	46	50	53	44	46	50	86	47	52	76	72	83	61	70	40	66	94	78	59	76	75	72	64	93	77	55	97	68	90	116	93	112	78	95	2.4	1.67	4.86	3	2.1	2.85
SK1G00040537	MergePeak_1173	quadrant5	no	68	38	42	39	38	22	36	39	25	32	36	51	29	28	33	61	79	51	33	50	31	27	42	38	62	26	43	35	51	22	64	50	44	35	61	42	49	62	54	79	4.89	3.07	3.56	3.19	2.99	1.74
SK1G00040539	MergePeak_1174	quadrant5	no	221	177	164	197	232	180	168	195	185	213	172	256	194	192	187	287	315	300	219	202	244	223	284	239	225	196	183	176	275	294	253	263	297	254	247	312	314	266	329	310	12.07	10.85	10.55	12.24	13.85	10.81
SK1G00040539	MergePeak_1175	quadrant5	no	221	177	164	197	232	180	168	195	185	213	172	256	194	192	187	287	315	300	219	202	244	223	284	239	225	196	183	176	275	294	253	263	297	254	247	312	314	266	329	310	12.07	10.85	10.55	12.24	13.85	10.81
SK1G00040540	MergePeak_1176	quadrant5	no	747	688	661	599	587	498	499	495	445	437	386	514	451	399	372	566	527	586	498	442	469	471	753	542	577	496	435	551	606	698	730	650	825	601	812	727	663	624	707	693	22.06	22.82	22.99	20.14	18.95	16.17
SK1G00040540	MergePeak_1177	quadrant5	no	747	688	661	599	587	498	499	495	445	437	386	514	451	399	372	566	527	586	498	442	469	471	753	542	577	496	435	551	606	698	730	650	825	601	812	727	663	624	707	693	22.06	22.82	22.99	20.14	18.95	16.17
SK1G00040540	MergePeak_1178	quadrant5	no	747	688	661	599	587	498	499	495	445	437	386	514	451	399	372	566	527	586	498	442	469	471	753	542	577	496	435	551	606	698	730	650	825	601	812	727	663	624	707	693	22.06	22.82	22.99	20.14	18.95	16.17
SK1G00040541	MergePeak_1179	quadrant5	no	247	151	228	138	150	152	155	102	186	173	113	191	170	125	121	211	186	191	170	171	155	169	233	180	199	145	146	173	183	228	167	152	213	155	211	175	228	194	230	231	9.58	6.58	10.42	6.09	6.36	6.48
SK1G00040543	MergePeak_1180	quadrant5	no	1617	1655	1401	1523	1705	1901	1859	1288	1529	1438	1256	1349	1451	1347	1367	1821	1629	1770	1490	1341	1440	1433	1768	1517	1777	1464	1531	1692	1903	1616	1491	1319	1921	1376	1518	1817	1613	1767	1828	1797	33.53	38.53	34.21	35.94	38.64	43.35
SK1G00040543	MergePeak_1181	quadrant5	no	1617	1655	1401	1523	1705	1901	1859	1288	1529	1438	1256	1349	1451	1347	1367	1821	1629	1770	1490	1341	1440	1433	1768	1517	1777	1464	1531	1692	1903	1616	1491	1319	1921	1376	1518	1817	1613	1767	1828	1797	33.53	38.53	34.21	35.94	38.64	43.35
SK1G00040544	MergePeak_1181	quadrant5	no	316	540	288	336	366	344	287	335	315	203	291	348	434	574	550	525	496	581	298	559	454	433	624	506	359	403	303	414	429	530	494	553	431	466	393	656	487	472	624	569	8.37	16.08	9	10.14	10.61	10.03
SK1G00040544	MergePeak_1182	quadrant5	no	316	540	288	336	366	344	287	335	315	203	291	348	434	574	550	525	496	581	298	559	454	433	624	506	359	403	303	414	429	530	494	553	431	466	393	656	487	472	624	569	8.37	16.08	9	10.14	10.61	10.03
SK1G00040545	MergePeak_1183	quadrant5	no	1884	2025	1673	2813	2042	2190	3005	2487	2201	2103	1935	3327	1854	1181	2220	2434	2179	2282	2548	1833	2317	1444	1629	989	1420	1435	1868	1177	949	1251	1383	1589	1311	1035	1055	1001	2337	853	1235	1749	43.5	52.5	45.5	73.93	51.54	55.61
SK1G00040545	MergePeak_1184	quadrant5	no	1884	2025	1673	2813	2042	2190	3005	2487	2201	2103	1935	3327	1854	1181	2220	2434	2179	2282	2548	1833	2317	1444	1629	989	1420	1435	1868	1177	949	1251	1383	1589	1311	1035	1055	1001	2337	853	1235	1749	43.5	52.5	45.5	73.93	51.54	55.61
SK1G00040546	MergePeak_1185	quadrant5	no	9	19	8	19	15	10	13	9	11	3	6	5	13	6	20	8	6	15	11	10	8	12	22	5	12	4	3	3	8	7	8	3	5	2	8	10	9	4	9	16	0.18	0.43	0.19	0.43	0.33	0.22
SK1G00040547	MergePeak_1186	quadrant5	no	2727	2608	2843	4689	3823	4155	6047	4607	3835	3692	3770	4736	3969	3021	4355	4828	4250	4277	5397	3924	5000	3429	3813	3130	3548	4099	4742	3190	2913	3080	3313	2890	3593	2567	2829	3477	4691	3788	3928	3351	55.38	57.52	67.42	108.23	85.94	93.75
SK1G00040547	MergePeak_1187	quadrant5	no	2727	2608	2843	4689	3823	4155	6047	4607	3835	3692	3770	4736	3969	3021	4355	4828	4250	4277	5397	3924	5000	3429	3813	3130	3548	4099	4742	3190	2913	3080	3313	2890	3593	2567	2829	3477	4691	3788	3928	3351	55.38	57.52	67.42	108.23	85.94	93.75
SK1G00040547	MergePeak_1188	quadrant5	no	2727	2608	2843	4689	3823	4155	6047	4607	3835	3692	3770	4736	3969	3021	4355	4828	4250	4277	5397	3924	5000	3429	3813	3130	3548	4099	4742	3190	2913	3080	3313	2890	3593	2567	2829	3477	4691	3788	3928	3351	55.38	57.52	67.42	108.23	85.94	93.75
SK1G00040547	MergePeak_1189	quadrant5	no	2727	2608	2843	4689	3823	4155	6047	4607	3835	3692	3770	4736	3969	3021	4355	4828	4250	4277	5397	3924	5000	3429	3813	3130	3548	4099	4742	3190	2913	3080	3313	2890	3593	2567	2829	3477	4691	3788	3928	3351	55.38	57.52	67.42	108.23	85.94	93.75
SK1G00040550	MergePeak_1190	quadrant8	no	105	54	41	45	52	55	100	50	15	16	46	26	47	31	32	44	51	15	10	22	11	9	35	14	12	35	16	8	11	4	9	17	34	5	10	4	7	7	25	13	17.68	10.21	8.13	8.63	9.57	10.19
SK1G00040551	MergePeak_1191	quadrant5	no	810	718	787	828	968	976	1218	995	1098	1056	1095	1388	1338	1159	1054	1498	1171	1469	1313	1349	1355	1349	1454	1296	1226	1443	1447	1350	1529	1395	1376	1147	1529	1221	1320	1733	1617	1532	1602	1566	27.28	27.15	31.22	31.74	35.64	36.15
SK1G00040551	MergePeak_1192	quadrant5	no	810	718	787	828	968	976	1218	995	1098	1056	1095	1388	1338	1159	1054	1498	1171	1469	1313	1349	1355	1349	1454	1296	1226	1443	1447	1350	1529	1395	1376	1147	1529	1221	1320	1733	1617	1532	1602	1566	27.28	27.15	31.22	31.74	35.64	36.15
SK1G00040552	MergePeak_1193	quadrant5	no	3072	2970	2956	3207	3162	3109	4037	3356	3613	3532	3325	4474	4047	2786	3522	4858	4626	5060	4106	4200	4181	4128	5114	3911	3747	4115	4331	4075	4361	4390	4003	3850	4995	3794	3875	4928	5373	4455	5522	5012	98.5	106.93	111.62	117.04	110.82	109.63
SK1G00040553	MergePeak_1194	quadrant5	no	924	749	941	845	905	835	935	858	922	887	814	966	969	921	893	1165	1106	1235	1055	1106	1128	929	1365	1071	1035	1182	1170	1077	1174	1386	1185	1088	1357	1194	1247	1377	1242	1325	1519	1437	14.85	13.51	17.81	15.45	15.9	14.76
SK1G00040553	MergePeak_1195	quadrant5	no	924	749	941	845	905	835	935	858	922	887	814	966	969	921	893	1165	1106	1235	1055	1106	1128	929	1365	1071	1035	1182	1170	1077	1174	1386	1185	1088	1357	1194	1247	1377	1242	1325	1519	1437	14.85	13.51	17.81	15.45	15.9	14.76
SK1G00040553	MergePeak_1196	quadrant5	no	924	749	941	845	905	835	935	858	922	887	814	966	969	921	893	1165	1106	1235	1055	1106	1128	929	1365	1071	1035	1182	1170	1077	1174	1386	1185	1088	1357	1194	1247	1377	1242	1325	1519	1437	14.85	13.51	17.81	15.45	15.9	14.76
SK1G00040554	MergePeak_1197	quadrant5	no	555	444	450	491	555	472	666	547	442	458	421	573	478	371	404	526	504	536	386	395	421	426	421	328	319	402	436	377	393	459	414	357	366	382	394	370	421	400	379	429	22.21	19.95	21.21	22.36	24.27	20.77
SK1G00040554	MergePeak_1198	quadrant5	no	555	444	450	491	555	472	666	547	442	458	421	573	478	371	404	526	504	536	386	395	421	426	421	328	319	402	436	377	393	459	414	357	366	382	394	370	421	400	379	429	22.21	19.95	21.21	22.36	24.27	20.77
SK1G00040556	MergePeak_1199	quadrant5	no	304	258	319	236	248	294	298	266	265	285	236	301	296	226	243	339	330	363	286	289	298	328	373	290	301	299	314	281	363	349	328	288	348	310	346	375	265	413	419	350	11.45	10.91	14.15	10.12	10.21	12.18
SK1G00040556	MergePeak_1200	quadrant5	no	304	258	319	236	248	294	298	266	265	285	236	301	296	226	243	339	330	363	286	289	298	328	373	290	301	299	314	281	363	349	328	288	348	310	346	375	265	413	419	350	11.45	10.91	14.15	10.12	10.21	12.18
SK1G00040557	MergePeak_1201	quadrant5	no	2504	2199	2181	1959	2388	2337	2228	1736	2062	2002	1892	2188	2615	2215	1882	2667	2665	2651	2287	2313	2301	2315	3228	3096	2353	2673	2430	2547	3043	3310	2826	2699	3232	2798	3218	3516	3138	3309	3667	3465	46.91	46.26	48.12	41.77	48.9	48.15
SK1G00040557	MergePeak_1202	quadrant5	no	2504	2199	2181	1959	2388	2337	2228	1736	2062	2002	1892	2188	2615	2215	1882	2667	2665	2651	2287	2313	2301	2315	3228	3096	2353	2673	2430	2547	3043	3310	2826	2699	3232	2798	3218	3516	3138	3309	3667	3465	46.91	46.26	48.12	41.77	48.9	48.15
SK1G00040558	MergePeak_1203	quadrant5	no	220	242	156	207	240	279	291	255	207	142	160	227	217	199	158	243	255	244	233	160	202	195	289	215	182	201	209	198	278	235	190	190	185	195	216	209	255	245	286	268	6.59	8.15	5.51	7.06	7.86	9.2
SK1G00040562	MergePeak_1204	quadrant5	no	134	118	138	123	134	111	143	118	131	104	99	149	132	154	131	165	150	139	75	174	113	114	237	190	199	188	181	172	202	193	148	139	202	175	183	213	138	227	250	223	6.96	6.88	8.44	7.27	7.6	6.34
SK1G00040562	MergePeak_1205	quadrant5	no	134	118	138	123	134	111	143	118	131	104	99	149	132	154	131	165	150	139	75	174	113	114	237	190	199	188	181	172	202	193	148	139	202	175	183	213	138	227	250	223	6.96	6.88	8.44	7.27	7.6	6.34
SK1G00040564	MergePeak_1206	quadrant2	no	7	4	12	9	2	10	25	13	13	9	9	30	28	24	16	29	25	32	35	28	33	17	18	13	7	51	46	17	34	33	38	30	22	15	37	18	28	60	20	36	0.79	0.51	1.6	1.16	0.25	1.24
SK1G00040565	MergePeak_1207	quadrant5	no	176	159	162	148	164	151	155	122	129	84	87	113	130	136	109	170	115	101	104	126	109	107	137	104	93	109	92	100	104	122	81	96	110	105	82	118	102	119	154	83	10.07	10.22	10.92	9.64	10.26	9.5
SK1G00040570	MergePeak_1208	quadrant5	no	21	6	17	14	10	15	12	6	5	17	12	10	10	9	12	28	26	14	12	9	13	13	24	19	9	16	25	12	18	20	10	26	18	16	20	25	25	11	21	17	0.88	0.28	0.83	0.66	0.46	0.69
SK1G00040571	MergePeak_1209	quadrant5	no	782	656	668	807	729	778	813	619	777	769	764	920	991	755	773	1137	887	1067	935	947	884	868	1163	1116	1000	1173	1034	942	1318	1300	1121	1020	1301	1053	1132	1414	1286	1414	1382	1397	14.12	13.3	14.21	16.59	14.39	15.45
SK1G00040571	MergePeak_1210	quadrant5	no	782	656	668	807	729	778	813	619	777	769	764	920	991	755	773	1137	887	1067	935	947	884	868	1163	1116	1000	1173	1034	942	1318	1300	1121	1020	1301	1053	1132	1414	1286	1414	1382	1397	14.12	13.3	14.21	16.59	14.39	15.45
SK1G00040573	MergePeak_1211	quadrant5	no	1509	1004	1333	1156	1255	1151	1318	1317	1284	1161	1294	1784	1982	1794	1401	2010	1839	2144	1471	1859	1414	1874	1914	1892	1640	1476	1479	1733	2067	1916	1945	1927	2277	1863	1827	2450	1796	2209	2396	2097	30.59	22.86	31.83	26.68	27.81	25.66
SK1G00040573	MergePeak_1212	quadrant5	no	1509	1004	1333	1156	1255	1151	1318	1317	1284	1161	1294	1784	1982	1794	1401	2010	1839	2144	1471	1859	1414	1874	1914	1892	1640	1476	1479	1733	2067	1916	1945	1927	2277	1863	1827	2450	1796	2209	2396	2097	30.59	22.86	31.83	26.68	27.81	25.66
SK1G00040574	MergePeak_1213	quadrant2	no	98	40	119	94	64	70	156	151	84	94	159	231	331	242	90	281	175	148	242	290	210	279	178	451	260	623	322	242	361	633	441	331	259	155	408	453	310	526	340	331	3.3	1.51	4.72	3.6	2.36	2.59
SK1G00040575	MergePeak_1214	quadrant5	no	17	13	24	8	31	13	14	12	11	9	6	20	10	21	19	22	28	27	11	15	8	26	36	23	11	20	15	7	13	29	15	14	14	12	15	21	20	27	35	17	1.07	0.92	1.77	0.57	2.13	0.9
SK1G00040576	MergePeak_1215	quadrant5	no	320	227	361	276	286	257	284	273	326	293	268	388	328	251	286	370	380	386	237	383	267	392	417	338	272	373	294	339	450	436	418	336	482	353	429	501	343	446	494	412	14.57	11.6	19.35	14.3	14.23	12.87
SK1G00040576	MergePeak_1216	quadrant5	no	320	227	361	276	286	257	284	273	326	293	268	388	328	251	286	370	380	386	237	383	267	392	417	338	272	373	294	339	450	436	418	336	482	353	429	501	343	446	494	412	14.57	11.6	19.35	14.3	14.23	12.87
SK1G00040577	MergePeak_1217	quadrant5	no	1223	1086	977	852	992	830	829	709	960	956	833	1096	949	879	916	1383	1220	1280	938	938	979	1026	1261	922	864	721	721	935	1120	1153	1010	956	1117	985	1109	1411	1153	1102	1298	1163	32.06	31.95	30.16	25.43	28.43	23.93
SK1G00040577	MergePeak_1218	quadrant5	no	1223	1086	977	852	992	830	829	709	960	956	833	1096	949	879	916	1383	1220	1280	938	938	979	1026	1261	922	864	721	721	935	1120	1153	1010	956	1117	985	1109	1411	1153	1102	1298	1163	32.06	31.95	30.16	25.43	28.43	23.93
SK1G00040577	MergePeak_1219	quadrant5	no	1223	1086	977	852	992	830	829	709	960	956	833	1096	949	879	916	1383	1220	1280	938	938	979	1026	1261	922	864	721	721	935	1120	1153	1010	956	1117	985	1109	1411	1153	1102	1298	1163	32.06	31.95	30.16	25.43	28.43	23.93
SK1G00040579	MergePeak_1220	quadrant5	no	255	197	261	238	279	241	308	264	278	251	203	322	211	168	259	361	318	338	249	287	279	252	337	263	267	329	291	239	323	262	277	260	329	200	222	306	367	343	356	310	9.17	7.96	11.06	9.75	10.97	9.54
SK1G00040581	MergePeak_1221	quadrant5	no	1112	1697	1111	1298	1271	1311	1194	1093	1091	921	843	981	1301	1056	1231	1184	1234	1291	1030	1037	1055	884	1245	1026	853	810	792	663	1030	886	758	736	889	737	842	927	802	999	868	1020	64.4	110.35	75.77	85.56	80.46	83.49
SK1G00040581	MergePeak_1222	quadrant5	no	1112	1697	1111	1298	1271	1311	1194	1093	1091	921	843	981	1301	1056	1231	1184	1234	1291	1030	1037	1055	884	1245	1026	853	810	792	663	1030	886	758	736	889	737	842	927	802	999	868	1020	64.4	110.35	75.77	85.56	80.46	83.49
SK1G00040583	MergePeak_1223	quadrant5	no	1262	1142	1177	1220	1255	1462	1494	1261	1508	1303	1297	1546	1621	1632	1315	1831	1468	1863	1622	1578	1672	1564	2227	2214	1757	1739	1851	1784	2304	2046	1948	1682	2427	1851	2084	2776	2407	2772	2898	2457	19.93	20.25	21.9	21.93	21.67	25.4
SK1G00040583	MergePeak_1224	quadrant5	no	1262	1142	1177	1220	1255	1462	1494	1261	1508	1303	1297	1546	1621	1632	1315	1831	1468	1863	1622	1578	1672	1564	2227	2214	1757	1739	1851	1784	2304	2046	1948	1682	2427	1851	2084	2776	2407	2772	2898	2457	19.93	20.25	21.9	21.93	21.67	25.4
SK1G00040583	MergePeak_1225	quadrant5	no	1262	1142	1177	1220	1255	1462	1494	1261	1508	1303	1297	1546	1621	1632	1315	1831	1468	1863	1622	1578	1672	1564	2227	2214	1757	1739	1851	1784	2304	2046	1948	1682	2427	1851	2084	2776	2407	2772	2898	2457	19.93	20.25	21.9	21.93	21.67	25.4
SK1G00040583	MergePeak_1226	quadrant5	no	1262	1142	1177	1220	1255	1462	1494	1261	1508	1303	1297	1546	1621	1632	1315	1831	1468	1863	1622	1578	1672	1564	2227	2214	1757	1739	1851	1784	2304	2046	1948	1682	2427	1851	2084	2776	2407	2772	2898	2457	19.93	20.25	21.9	21.93	21.67	25.4
SK1G00040583	MergePeak_1227	quadrant5	no	1262	1142	1177	1220	1255	1462	1494	1261	1508	1303	1297	1546	1621	1632	1315	1831	1468	1863	1622	1578	1672	1564	2227	2214	1757	1739	1851	1784	2304	2046	1948	1682	2427	1851	2084	2776	2407	2772	2898	2457	19.93	20.25	21.9	21.93	21.67	25.4
SK1G00040584	MergePeak_1228	quadrant5	no	131	116	70	112	112	127	130	101	125	93	101	126	145	94	119	169	114	161	140	138	147	137	147	171	163	125	132	117	187	122	143	118	162	146	141	192	160	151	222	235	19.66	19.55	12.37	19.13	18.38	20.96
SK1G00040587	MergePeak_1229	quadrant6	no	181	140	137	127	151	136	138	149	158	166	142	169	169	186	154	238	197	211	154	206	148	211	280	259	254	276	242	223	241	254	244	213	287	248	302	343	273	270	372	340	12.17	10.57	10.85	9.72	11.1	10.06
SK1G00040587	MergePeak_1230	quadrant5	no	181	140	137	127	151	136	138	149	158	166	142	169	169	186	154	238	197	211	154	206	148	211	280	259	254	276	242	223	241	254	244	213	287	248	302	343	273	270	372	340	12.17	10.57	10.85	9.72	11.1	10.06
SK1G00040590	MergePeak_1231	quadrant5	no	1738	1518	1399	1253	1452	1258	1232	1229	1266	1281	1305	1631	1405	1129	1148	1835	1662	1659	1213	1515	1280	1391	1578	1189	941	853	908	1099	1513	1463	1239	1173	1386	1127	1281	1502	1184	1196	1569	1401	36.32	35.63	34.44	29.81	33.17	28.92
SK1G00040590	MergePeak_1232	quadrant5	no	1738	1518	1399	1253	1452	1258	1232	1229	1266	1281	1305	1631	1405	1129	1148	1835	1662	1659	1213	1515	1280	1391	1578	1189	941	853	908	1099	1513	1463	1239	1173	1386	1127	1281	1502	1184	1196	1569	1401	36.32	35.63	34.44	29.81	33.17	28.92
SK1G00040590	MergePeak_1233	quadrant5	no	1738	1518	1399	1253	1452	1258	1232	1229	1266	1281	1305	1631	1405	1129	1148	1835	1662	1659	1213	1515	1280	1391	1578	1189	941	853	908	1099	1513	1463	1239	1173	1386	1127	1281	1502	1184	1196	1569	1401	36.32	35.63	34.44	29.81	33.17	28.92
SK1G00040590	MergePeak_1234	quadrant5	no	1738	1518	1399	1253	1452	1258	1232	1229	1266	1281	1305	1631	1405	1129	1148	1835	1662	1659	1213	1515	1280	1391	1578	1189	941	853	908	1099	1513	1463	1239	1173	1386	1127	1281	1502	1184	1196	1569	1401	36.32	35.63	34.44	29.81	33.17	28.92
SK1G00040599	MergePeak_1235	quadrant5	no	667	746	579	704	668	674	687	677	614	600	628	654	786	660	627	745	705	806	695	686	616	626	824	663	649	658	655	667	727	774	727	591	720	649	650	776	733	804	831	856	17.15	21.54	17.54	20.61	18.78	19.06
SK1G00040600	MergePeak_1236	quadrant5	no	183	185	188	187	198	183	250	176	249	217	216	259	278	172	196	289	255	310	241	294	308	272	347	365	330	465	378	299	308	318	365	338	388	316	364	393	426	471	393	443	6.12	6.95	7.41	7.12	7.24	6.73
SK1G00040600	MergePeak_1237	quadrant5	no	183	185	188	187	198	183	250	176	249	217	216	259	278	172	196	289	255	310	241	294	308	272	347	365	330	465	378	299	308	318	365	338	388	316	364	393	426	471	393	443	6.12	6.95	7.41	7.12	7.24	6.73
SK1G00040600	MergePeak_1238	quadrant5	no	183	185	188	187	198	183	250	176	249	217	216	259	278	172	196	289	255	310	241	294	308	272	347	365	330	465	378	299	308	318	365	338	388	316	364	393	426	471	393	443	6.12	6.95	7.41	7.12	7.24	6.73
SK1G00040601	MergePeak_1239	quadrant5	no	1372	1409	998	1111	993	1146	1034	973	926	1048	1085	1183	1045	1002	1022	1392	1379	1503	1176	1069	1098	1141	1296	979	1008	662	685	735	1156	965	935	1001	1156	1012	1002	1293	1108	1174	1257	1341	166.51	192.01	142.65	153.47	131.73	152.96
SK1G00040603	MergePeak_1240	quadrant5	no	1147	1119	986	1148	1267	1268	1241	1153	1014	978	1142	1153	1570	1840	1219	1517	1404	1584	1492	1451	1424	1626	2032	2134	2010	1548	1426	1441	1947	1688	1811	1661	1633	1727	1168	2260	1509	1980	1796	1779	33.12	36.28	33.53	37.73	39.99	40.27
SK1G00040603	MergePeak_1241	quadrant5	no	1147	1119	986	1148	1267	1268	1241	1153	1014	978	1142	1153	1570	1840	1219	1517	1404	1584	1492	1451	1424	1626	2032	2134	2010	1548	1426	1441	1947	1688	1811	1661	1633	1727	1168	2260	1509	1980	1796	1779	33.12	36.28	33.53	37.73	39.99	40.27
SK1G00040604	MergePeak_1241	quadrant5	no	0	0	0	0	0	0	0	0	0	0	0	0	0	0	0	0	0	0	0	0	0	0	0	0	0	0	0	0	0	0	0	0	0	0	0	0	0	0	0	0	0	0	0	0	0	0
SK1G00040607	MergePeak_1242	quadrant8	no	31	22	5	20	29	33	29	52	13	8	8	14	31	17	24	16	23	9	7	12	31	13	31	23	16	12	20	15	6	10	1	5	5	12	1	2	12	3	2	15	6.83	5.44	1.3	5.02	6.99	8
SK1G00040608	MergePeak_1243	quadrant5	no	485	379	421	450	440	441	530	419	458	424	458	475	550	546	418	704	589	629	562	571	559	580	753	786	760	689	682	645	730	718	681	649	885	666	807	944	900	980	839	903	8.93	7.84	9.13	9.44	8.86	8.93
SK1G00040608	MergePeak_1244	quadrant5	no	485	379	421	450	440	441	530	419	458	424	458	475	550	546	418	704	589	629	562	571	559	580	753	786	760	689	682	645	730	718	681	649	885	666	807	944	900	980	839	903	8.93	7.84	9.13	9.44	8.86	8.93
SK1G00040608	MergePeak_1245	quadrant5	no	485	379	421	450	440	441	530	419	458	424	458	475	550	546	418	704	589	629	562	571	559	580	753	786	760	689	682	645	730	718	681	649	885	666	807	944	900	980	839	903	8.93	7.84	9.13	9.44	8.86	8.93
SK1G00040612	MergePeak_1246	quadrant5	no	229	222	142	189	179	187	195	148	157	155	134	147	212	167	166	246	169	179	143	166	149	155	185	121	87	81	92	79	117	114	135	116	121	103	99	110	116	85	133	122	6.72	7.32	4.91	6.31	5.74	6.04
SK1G00040619	MergePeak_1247	quadrant5	no	1554	1345	1335	1402	1275	1387	1373	1181	1310	1227	1109	1413	1446	1282	1092	1762	1549	1667	1257	1364	1230	1175	1442	1034	887	995	829	975	1271	1344	1110	1106	1097	1101	1126	1308	1310	1256	1434	1218	50.92	49.55	51.56	52.31	45.7	50.03
SK1G00040619	MergePeak_1248	quadrant5	no	1554	1345	1335	1402	1275	1387	1373	1181	1310	1227	1109	1413	1446	1282	1092	1762	1549	1667	1257	1364	1230	1175	1442	1034	887	995	829	975	1271	1344	1110	1106	1097	1101	1126	1308	1310	1256	1434	1218	50.92	49.55	51.56	52.31	45.7	50.03
SK1G00040623	MergePeak_1249	quadrant5	no	254	154	149	150	212	83	169	148	185	183	113	217	192	134	167	242	181	205	160	184	161	148	213	139	144	176	131	189	179	140	257	198	185	173	192	273	185	196	184	156	10.66	7.26	7.36	7.16	9.72	3.83
SK1G00040623	MergePeak_1250	quadrant5	no	254	154	149	150	212	83	169	148	185	183	113	217	192	134	167	242	181	205	160	184	161	148	213	139	144	176	131	189	179	140	257	198	185	173	192	273	185	196	184	156	10.66	7.26	7.36	7.16	9.72	3.83
SK1G00040624	MergePeak_1251	quadrant5	no	56	59	46	62	63	65	70	56	47	46	52	51	71	68	63	76	69	67	45	92	97	69	118	105	93	88	118	99	116	83	62	75	103	85	77	94	95	96	122	108	1.82	2.16	1.76	2.3	2.24	2.33
SK1G00040624	MergePeak_1252	quadrant6	no	56	59	46	62	63	65	70	56	47	46	52	51	71	68	63	76	69	67	45	92	97	69	118	105	93	88	118	99	116	83	62	75	103	85	77	94	95	96	122	108	1.82	2.16	1.76	2.3	2.24	2.33
SK1G00040625	MergePeak_1253	quadrant5	no	85	140	97	106	87	117	81	76	101	93	110	113	138	172	124	177	201	170	122	174	180	152	253	234	166	145	99	131	190	213	173	162	175	155	186	247	197	191	261	198	2.76	5.11	3.71	3.92	3.09	4.18
SK1G00040625	MergePeak_1254	quadrant4	no	85	140	97	106	87	117	81	76	101	93	110	113	138	172	124	177	201	170	122	174	180	152	253	234	166	145	99	131	190	213	173	162	175	155	186	247	197	191	261	198	2.76	5.11	3.71	3.92	3.09	4.18
SK1G00040625	MergePeak_1255	quadrant5	no	85	140	97	106	87	117	81	76	101	93	110	113	138	172	124	177	201	170	122	174	180	152	253	234	166	145	99	131	190	213	173	162	175	155	186	247	197	191	261	198	2.76	5.11	3.71	3.92	3.09	4.18
SK1G00040627	MergePeak_1256	quadrant5	no	30	73	41	38	40	40	30	35	33	29	40	39	36	28	62	39	52	45	38	31	33	41	49	37	29	28	38	34	54	46	40	59	30	34	40	29	24	36	30	48	0.93	2.55	1.5	1.35	1.36	1.37
SK1G00040628	MergePeak_1257	quadrant5	no	66	71	63	44	57	49	46	52	58	54	36	51	62	48	42	61	51	61	54	50	52	64	70	70	44	53	67	52	76	60	83	59	76	66	82	79	61	79	62	60	4.44	5.37	5	3.37	4.19	3.63
SK1G00040630	MergePeak_1258	quadrant5	no	73	45	76	82	92	65	123	148	106	63	147	186	180	63	119	235	149	147	158	116	185	134	255	142	144	287	286	139	103	80	117	85	119	66	101	108	156	155	231	150	3.01	2.08	3.69	3.85	4.15	2.95
SK1G00040635	MergePeak_1259	quadrant5	no	710	478	698	652	672	513	708	599	656	596	613	769	840	685	622	914	752	841	652	991	650	753	1097	895	744	999	824	873	998	983	961	838	939	903	877	1257	1003	1058	1128	1059	26.97	20.39	31.22	28.19	27.9	21.43
SK1G00040635	MergePeak_1260	quadrant5	no	710	478	698	652	672	513	708	599	656	596	613	769	840	685	622	914	752	841	652	991	650	753	1097	895	744	999	824	873	998	983	961	838	939	903	877	1257	1003	1058	1128	1059	26.97	20.39	31.22	28.19	27.9	21.43
SK1G00040640	MergePeak_1261	quadrant2	no	23	11	11	10	22	22	17	11	23	22	12	32	55	35	47	40	26	40	32	30	45	42	41	90	51	61	48	63	65	50	64	58	46	60	117	92	58	102	61	59	1.99	1.07	1.12	0.99	2.08	2.1
SK1G00040640	MergePeak_1262	quadrant2	no	23	11	11	10	22	22	17	11	23	22	12	32	55	35	47	40	26	40	32	30	45	42	41	90	51	61	48	63	65	50	64	58	46	60	117	92	58	102	61	59	1.99	1.07	1.12	0.99	2.08	2.1
SK1G00040643	MergePeak_1263	quadrant5	no	422	317	451	369	416	324	447	391	441	378	399	518	547	412	434	566	559	565	445	483	424	459	540	499	535	469	430	469	499	539	561	482	588	425	525	648	562	543	641	553	11.07	9.34	13.93	11.02	11.93	9.35
SK1G00040644	MergePeak_1264	quadrant5	no	455	403	411	325	373	368	319	275	331	343	361	365	403	403	339	474	411	522	360	418	373	447	678	536	657	669	576	589	734	622	540	564	749	603	792	746	636	776	854	833	8.78	8.73	9.34	7.14	7.87	7.81
SK1G00040647	MergePeak_1265	quadrant5	no	765	652	619	653	704	772	684	635	762	703	792	822	1002	965	828	1140	951	1130	953	1062	1084	1167	1255	1320	979	1228	1037	1100	1381	1310	1364	1142	1447	1147	1249	1564	1338	1556	1395	1366	21.73	20.79	20.7	21.11	21.85	24.11
SK1G00040647	MergePeak_1266	quadrant5	no	765	652	619	653	704	772	684	635	762	703	792	822	1002	965	828	1140	951	1130	953	1062	1084	1167	1255	1320	979	1228	1037	1100	1381	1310	1364	1142	1447	1147	1249	1564	1338	1556	1395	1366	21.73	20.79	20.7	21.11	21.85	24.11
SK1G00040648	MergePeak_1267	quadrant5	no	869	674	821	700	768	689	770	612	613	657	509	639	679	706	590	856	712	775	652	789	605	722	916	754	606	690	619	729	1007	813	719	635	850	815	855	993	705	884	956	864	10.03	8.74	11.16	9.2	9.69	8.75
SK1G00040649	MergePeak_1268	quadrant5	no	33	41	29	36	39	23	27	29	24	25	21	24	43	46	39	42	28	48	23	53	18	36	60	43	21	35	32	40	43	34	46	34	38	46	37	46	38	53	40	58	4.85	6.76	5.02	6.02	6.26	3.72
SK1G00040654	MergePeak_1269	quadrant6	no	0	0	0	0	0	0	0	0	0	0	0	0	0	0	0	0	0	0	0	0	0	0	0	0	0	0	0	0	0	0	0	0	0	0	0	0	0	0	0	0	0	0	0	0	0	0
SK1G00040656	MergePeak_1270	quadrant5	no	172	153	122	146	129	136	161	127	170	168	162	222	226	207	187	267	201	292	222	240	208	241	410	397	370	430	367	325	306	390	309	273	341	293	354	392	375	491	438	422	8.66	8.65	7.24	8.37	7.1	7.53
SK1G00040656	MergePeak_1271	quadrant5	no	172	153	122	146	129	136	161	127	170	168	162	222	226	207	187	267	201	292	222	240	208	241	410	397	370	430	367	325	306	390	309	273	341	293	354	392	375	491	438	422	8.66	8.65	7.24	8.37	7.1	7.53
SK1G00040658	MergePeak_1272	quadrant5	no	192	133	183	183	171	165	169	127	127	127	115	161	140	109	126	153	175	125	132	122	104	109	94	101	41	54	55	53	101	79	78	73	92	100	72	95	69	70	74	91	10.87	8.45	12.2	11.79	10.58	10.27
SK1G00040658	MergePeak_1273	quadrant5	no	192	133	183	183	171	165	169	127	127	127	115	161	140	109	126	153	175	125	132	122	104	109	94	101	41	54	55	53	101	79	78	73	92	100	72	95	69	70	74	91	10.87	8.45	12.2	11.79	10.58	10.27
SK1G00040660	MergePeak_1274	quadrant5	no	927	740	781	824	813	815	825	689	789	737	793	989	969	803	780	1105	988	1130	915	940	902	1022	1243	1157	971	1011	850	830	1058	1044	1087	895	1290	923	1073	1390	1207	1358	1440	1240	96.65	86.63	95.9	97.78	92.65	93.45
SK1G00040661	MergePeak_1275	quadrant5	no	866	597	765	650	795	638	832	751	829	795	844	1124	978	918	947	1315	1286	1373	1030	1210	1121	1113	1775	1579	1857	1831	1596	1505	1709	1859	1708	1617	1802	1329	1718	2023	1750	1987	2188	2096	20.47	15.84	21.29	17.49	20.54	16.58
SK1G00040661	MergePeak_1276	quadrant5	no	866	597	765	650	795	638	832	751	829	795	844	1124	978	918	947	1315	1286	1373	1030	1210	1121	1113	1775	1579	1857	1831	1596	1505	1709	1859	1708	1617	1802	1329	1718	2023	1750	1987	2188	2096	20.47	15.84	21.29	17.49	20.54	16.58
SK1G00040663	MergePeak_1277	quadrant5	no	8	3	7	7	13	6	6	13	22	9	12	10	14	9	5	33	10	29	22	28	12	21	21	29	12	29	16	12	23	17	29	28	29	18	38	41	29	24	32	34	0.78	0.33	0.8	0.77	1.38	0.64
SK1G00040664	MergePeak_1278	quadrant2	no	89	67	69	75	66	72	77	46	109	121	115	113	164	159	138	150	123	182	165	189	212	246	316	346	310	320	241	243	319	316	306	227	380	283	283	379	325	367	333	381	8.01	6.77	7.32	7.69	6.5	7.13
SK1G00040665	MergePeak_1279	quadrant5	no	1087	836	958	753	940	719	944	858	1068	1051	1013	1357	1255	1132	1170	1430	1369	1531	1176	1419	1227	1400	1969	1908	1644	2053	1895	1614	1858	1893	1957	1719	2163	1516	2103	2540	2216	2585	2566	2326	76.23	65.83	79.13	60.11	72.06	55.46
SK1G00040665	MergePeak_1280	quadrant5	no	1087	836	958	753	940	719	944	858	1068	1051	1013	1357	1255	1132	1170	1430	1369	1531	1176	1419	1227	1400	1969	1908	1644	2053	1895	1614	1858	1893	1957	1719	2163	1516	2103	2540	2216	2585	2566	2326	76.23	65.83	79.13	60.11	72.06	55.46
SK1G00040666	MergePeak_1281	quadrant5	no	271	432	206	676	517	687	468	500	400	263	318	245	578	562	547	400	577	574	475	379	641	362	602	617	369	763	600	450	466	507	482	339	293	360	335	433	518	829	364	669	11.88	21.27	10.64	33.74	24.78	33.13
SK1G00040666	MergePeak_1282	quadrant5	no	271	432	206	676	517	687	468	500	400	263	318	245	578	562	547	400	577	574	475	379	641	362	602	617	369	763	600	450	466	507	482	339	293	360	335	433	518	829	364	669	11.88	21.27	10.64	33.74	24.78	33.13
SK1G00040666	MergePeak_1283	quadrant5	no	271	432	206	676	517	687	468	500	400	263	318	245	578	562	547	400	577	574	475	379	641	362	602	617	369	763	600	450	466	507	482	339	293	360	335	433	518	829	364	669	11.88	21.27	10.64	33.74	24.78	33.13
SK1G00040666	MergePeak_1284	quadrant5	no	271	432	206	676	517	687	468	500	400	263	318	245	578	562	547	400	577	574	475	379	641	362	602	617	369	763	600	450	466	507	482	339	293	360	335	433	518	829	364	669	11.88	21.27	10.64	33.74	24.78	33.13
SK1G00040667	MergePeak_1284	quadrant5	no	423	295	328	328	376	340	429	314	348	318	338	415	353	387	335	560	417	456	421	465	423	450	555	517	436	490	451	466	497	571	517	518	564	496	502	628	550	562	664	509	15.61	12.22	14.25	13.78	15.17	13.8
SK1G00040667	MergePeak_1285	quadrant5	no	423	295	328	328	376	340	429	314	348	318	338	415	353	387	335	560	417	456	421	465	423	450	555	517	436	490	451	466	497	571	517	518	564	496	502	628	550	562	664	509	15.61	12.22	14.25	13.78	15.17	13.8
SK1G00040670	MergePeak_1286	quadrant5	no	479	363	374	391	423	382	375	378	422	421	403	451	470	427	373	547	535	568	450	467	519	449	482	490	475	452	450	520	563	533	485	503	573	413	524	537	518	590	582	600	15.69	13.35	14.43	14.58	15.15	13.76
SK1G00040670	MergePeak_1287	quadrant5	no	479	363	374	391	423	382	375	378	422	421	403	451	470	427	373	547	535	568	450	467	519	449	482	490	475	452	450	520	563	533	485	503	573	413	524	537	518	590	582	600	15.69	13.35	14.43	14.58	15.15	13.76
SK1G00040673	MergePeak_1289	quadrant5	no	437	360	387	358	403	358	405	307	369	285	359	443	446	394	372	481	485	512	434	413	440	457	534	533	420	405	390	372	543	479	468	434	476	477	501	464	420	468	514	559	46.82	43.31	48.83	43.66	47.2	42.18
SK1G00040675	MergePeak_1290	quadrant5	no	517	407	568	681	598	739	975	845	668	717	766	1021	864	613	692	1318	978	999	1001	788	915	607	561	378	469	666	665	557	469	473	702	529	525	444	469	456	575	565	447	420	12.52	11.07	16.21	18.78	15.84	19.69
SK1G00040675	MergePeak_1291	quadrant5	no	517	407	568	681	598	739	975	845	668	717	766	1021	864	613	692	1318	978	999	1001	788	915	607	561	378	469	666	665	557	469	473	702	529	525	444	469	456	575	565	447	420	12.52	11.07	16.21	18.78	15.84	19.69
SK1G00040676	MergePeak_1292	quadrant5	no	132	157	77	284	391	646	567	784	575	448	544	615	843	506	845	626	873	713	563	549	860	456	151	320	342	374	289	311	159	282	112	157	63	258	109	137	205	199	102	358	7.19	9.6	4.94	17.6	23.28	38.69
SK1G00040676	MergePeak_1293	quadrant5	no	132	157	77	284	391	646	567	784	575	448	544	615	843	506	845	626	873	713	563	549	860	456	151	320	342	374	289	311	159	282	112	157	63	258	109	137	205	199	102	358	7.19	9.6	4.94	17.6	23.28	38.69
SK1G00040678	MergePeak_1294	quadrant5	no	435	1200	202	1490	1059	1545	718	752	523	256	401	316	864	1057	1086	584	1064	779	670	527	1126	435	1176	758	436	404	404	429	560	549	171	241	114	356	206	177	338	337	261	582	7.8	24.16	4.27	30.41	20.76	30.47
SK1G00040679	MergePeak_1295	quadrant5	no	2405	1603	2150	1827	2250	2103	2748	2438	1940	1877	2325	2554	2526	1696	2084	3065	2838	2928	2574	2388	2718	2411	2957	2792	3145	3230	3022	2587	2657	2688	3430	2757	3170	2234	3576	2942	2813	2813	3165	3432	99.89	74.76	105.17	86.37	102.16	96.06
SK1G00040679	MergePeak_1296	quadrant5	no	2405	1603	2150	1827	2250	2103	2748	2438	1940	1877	2325	2554	2526	1696	2084	3065	2838	2928	2574	2388	2718	2411	2957	2792	3145	3230	3022	2587	2657	2688	3430	2757	3170	2234	3576	2942	2813	2813	3165	3432	99.89	74.76	105.17	86.37	102.16	96.06
SK1G00040680	MergePeak_1297	quadrant5	no	10	113	10	52	26	48	29	36	22	12	25	16	33	25	54	20	33	27	20	24	48	11	32	29	41	38	41	22	20	32	26	21	31	22	21	20	33	38	33	42	0.58	7.36	0.68	3.43	1.65	3.06
SK1G00040680	MergePeak_1298	quadrant5	no	10	113	10	52	26	48	29	36	22	12	25	16	33	25	54	20	33	27	20	24	48	11	32	29	41	38	41	22	20	32	26	21	31	22	21	20	33	38	33	42	0.58	7.36	0.68	3.43	1.65	3.06
SK1G00040682	MergePeak_1299	quadrant5	no	386	302	317	418	369	391	472	445	612	545	557	730	661	655	658	781	733	868	799	878	945	765	1100	969	1245	1209	1096	955	1194	1158	1108	996	1149	927	1160	1200	1296	1243	1214	1280	10.58	9.3	10.24	13.05	11.06	11.79
SK1G00040682	MergePeak_1300	quadrant5	no	386	302	317	418	369	391	472	445	612	545	557	730	661	655	658	781	733	868	799	878	945	765	1100	969	1245	1209	1096	955	1194	1158	1108	996	1149	927	1160	1200	1296	1243	1214	1280	10.58	9.3	10.24	13.05	11.06	11.79
SK1G00040684	MergePeak_1301	quadrant5	no	4853	3825	4307	5728	6569	6757	8887	6985	4809	4507	4071	6083	5297	3917	5012	5820	5654	5209	4501	4206	4949	3235	3841	3101	2905	3434	3778	2573	2140	2957	2754	3009	2884	2508	3270	2799	3281	3147	2818	4117	87.76	77.67	91.73	117.9	129.86	134.39
SK1G00040684	MergePeak_1302	quadrant5	no	4853	3825	4307	5728	6569	6757	8887	6985	4809	4507	4071	6083	5297	3917	5012	5820	5654	5209	4501	4206	4949	3235	3841	3101	2905	3434	3778	2573	2140	2957	2754	3009	2884	2508	3270	2799	3281	3147	2818	4117	87.76	77.67	91.73	117.9	129.86	134.39
SK1G00040684	MergePeak_1303	quadrant5	no	4853	3825	4307	5728	6569	6757	8887	6985	4809	4507	4071	6083	5297	3917	5012	5820	5654	5209	4501	4206	4949	3235	3841	3101	2905	3434	3778	2573	2140	2957	2754	3009	2884	2508	3270	2799	3281	3147	2818	4117	87.76	77.67	91.73	117.9	129.86	134.39
SK1G00040685	MergePeak_1304	quadrant5	no	392	254	264	327	331	333	366	289	347	310	293	343	425	336	328	439	395	467	335	403	379	366	510	453	421	465	457	409	415	496	475	374	443	395	473	596	463	501	600	548	14.15	10.3	11.23	13.44	13.06	13.22
SK1G00040685	MergePeak_1305	quadrant5	no	392	254	264	327	331	333	366	289	347	310	293	343	425	336	328	439	395	467	335	403	379	366	510	453	421	465	457	409	415	496	475	374	443	395	473	596	463	501	600	548	14.15	10.3	11.23	13.44	13.06	13.22
SK1G00040686	MergePeak_1306	quadrant5	no	422	546	347	564	582	719	409	574	474	375	391	484	600	752	741	694	861	775	542	602	765	538	898	775	552	406	439	484	615	755	547	471	521	515	522	716	618	642	679	961	37.35	54.27	36.17	56.82	56.31	69.99
SK1G00040687	MergePeak_1307	quadrant5	no	148	149	96	130	123	156	118	110	114	103	115	127	142	90	107	110	109	147	133	139	107	122	141	143	122	130	95	107	147	129	140	102	146	138	138	175	126	131	146	180	6.52	7.37	4.98	6.52	5.93	7.56
SK1G00040689	MergePeak_1308	quadrant5	no	2241	1728	2165	2477	2586	2329	2782	2277	1715	1758	1956	2567	1956	1613	1920	2974	2382	2235	2155	1822	1845	1505	2144	1501	1633	2103	2041	1314	1242	1631	1540	1479	1776	1080	1335	1586	2273	1689	1995	1612	39.07	33.83	44.46	49.16	49.28	44.66
SK1G00040689	MergePeak_1309	quadrant5	no	2241	1728	2165	2477	2586	2329	2782	2277	1715	1758	1956	2567	1956	1613	1920	2974	2382	2235	2155	1822	1845	1505	2144	1501	1633	2103	2041	1314	1242	1631	1540	1479	1776	1080	1335	1586	2273	1689	1995	1612	39.07	33.83	44.46	49.16	49.28	44.66
SK1G00040691	MergePeak_1310	quadrant5	no	1270	1045	1415	1848	1729	1774	2500	2103	2297	2291	2371	3291	2577	2267	2603	3106	2788	3222	3481	2843	3443	2790	2525	2801	2610	3208	2998	2639	2301	2653	3312	2796	3012	2291	2453	3015	3771	2741	2516	3100	46.15	42.64	60.56	76.43	68.68	70.89
SK1G00040691	MergePeak_1311	quadrant5	no	1270	1045	1415	1848	1729	1774	2500	2103	2297	2291	2371	3291	2577	2267	2603	3106	2788	3222	3481	2843	3443	2790	2525	2801	2610	3208	2998	2639	2301	2653	3312	2796	3012	2291	2453	3015	3771	2741	2516	3100	46.15	42.64	60.56	76.43	68.68	70.89
SK1G00040691	MergePeak_1312	quadrant5	no	1270	1045	1415	1848	1729	1774	2500	2103	2297	2291	2371	3291	2577	2267	2603	3106	2788	3222	3481	2843	3443	2790	2525	2801	2610	3208	2998	2639	2301	2653	3312	2796	3012	2291	2453	3015	3771	2741	2516	3100	46.15	42.64	60.56	76.43	68.68	70.89
SK1G00040692	MergePeak_1312	quadrant2	no	0	2	0	1	1	1	0	2	3	1	5	0	2	4	5	5	1	1	0	0	8	2	5	1	3	2	4	3	4	3	3	2	4	5	6	3	6	1	2	2	0	0.09	0	0.04	0.04	0.04
SK1G00040696	MergePeak_1313	quadrant5	no	13	20	8	12	21	11	16	16	27	16	20	10	18	25	19	43	21	44	22	10	14	17	24	23	28	54	39	10	32	19	34	18	31	20	30	24	27	44	33	32	0.28	0.48	0.2	0.29	0.49	0.26
SK1G00040697	MergePeak_1314	quadrant5	no	438	364	365	277	287	326	289	209	218	164	172	216	207	189	164	285	177	210	215	177	189	216	395	412	353	350	349	250	299	323	321	296	401	236	374	368	357	432	401	447	39.1	36.49	38.38	28.15	28.01	32.01
SK1G00040698	MergePeak_1315	quadrant5	no	396	313	306	320	357	310	303	239	358	367	267	394	364	294	324	350	374	447	327	336	362	271	515	323	418	418	380	280	421	375	444	347	429	354	415	480	434	472	474	450	17.43	15.47	15.86	16.03	17.17	15
SK1G00040698	MergePeak_1316	quadrant5	no	396	313	306	320	357	310	303	239	358	367	267	394	364	294	324	350	374	447	327	336	362	271	515	323	418	418	380	280	421	375	444	347	429	354	415	480	434	472	474	450	17.43	15.47	15.86	16.03	17.17	15
SK1G00040700	MergePeak_1317	quadrant5	no	12	27	19	17	28	20	21	26	23	28	24	18	38	51	32	36	28	38	26	42	30	48	57	46	28	53	44	40	33	33	32	46	30	24	34	45	52	75	47	41	0.45	1.14	0.84	0.73	1.15	0.83
SK1G00040701	MergePeak_1318	quadrant5	no	675	703	796	879	1053	937	1092	943	1090	1026	1218	1532	1504	1227	1221	1569	1364	1809	1551	1220	1459	1314	1208	1208	1017	1281	1363	1114	1185	1194	1537	1250	1363	1041	1342	1558	1785	1333	1263	1321	16.35	19.12	22.7	24.23	27.87	24.95
SK1G00040701	MergePeak_1319	quadrant5	no	675	703	796	879	1053	937	1092	943	1090	1026	1218	1532	1504	1227	1221	1569	1364	1809	1551	1220	1459	1314	1208	1208	1017	1281	1363	1114	1185	1194	1537	1250	1363	1041	1342	1558	1785	1333	1263	1321	16.35	19.12	22.7	24.23	27.87	24.95
SK1G00040702	MergePeak_1320	quadrant5	no	833	715	797	654	1051	1101	1072	1139	997	791	754	994	1229	874	1090	1211	1186	1050	851	978	1119	808	829	857	846	984	926	832	697	775	656	824	590	860	722	763	693	531	684	1097	63.9	61.59	72.01	57.1	88.13	92.89
SK1G00040702	MergePeak_1321	quadrant5	no	833	715	797	654	1051	1101	1072	1139	997	791	754	994	1229	874	1090	1211	1186	1050	851	978	1119	808	829	857	846	984	926	832	697	775	656	824	590	860	722	763	693	531	684	1097	63.9	61.59	72.01	57.1	88.13	92.89
SK1G00040705	MergePeak_1322	quadrant5	no	519	413	513	496	399	369	522	492	458	423	435	524	625	494	404	570	511	529	495	564	441	519	561	440	457	463	489	534	537	577	527	503	583	479	524	652	543	559	606	534	12.07	10.79	14.06	13.13	10.15	9.44
SK1G00040710	MergePeak_1323	quadrant5	no	148	129	109	110	172	157	160	143	166	224	212	221	205	173	181	246	180	256	247	226	240	216	264	265	64	218	233	282	263	281	248	271	337	288	294	295	318	331	364	284	5.59	5.44	4.85	4.7	7.07	6.5
SK1G00040710	MergePeak_1324	quadrant5	no	148	129	109	110	172	157	160	143	166	224	212	221	205	173	181	246	180	256	247	226	240	216	264	265	64	218	233	282	263	281	248	271	337	288	294	295	318	331	364	284	5.59	5.44	4.85	4.7	7.07	6.5
SK1G00040714	MergePeak_1325	quadrant6	no	382	378	345	340	398	356	450	378	327	315	268	308	379	303	330	372	350	379	321	327	322	325	453	504	468	517	509	349	362	400	397	359	535	378	508	485	456	604	483	574	12.21	15.27	11.23	14	16.26	14.49
SK1G00040714	MergePeak_1326	quadrant5	no	382	378	345	340	398	356	450	378	327	315	268	308	379	303	330	372	350	379	321	327	322	325	453	504	468	517	509	349	362	400	397	359	535	378	508	485	456	604	483	574	12.21	15.27	11.23	14	16.26	14.49
SK1G00040715	MergePeak_1327	quadrant5	no	1917	1645	1811	1879	2078	1931	2312	1882	2205	2056	2048	2671	2551	2252	2124	2993	2829	3093	2683	2630	2746	2656	3604	3249	3087	3103	3155	2835	3252	3710	3325	2921	3589	2805	3340	3911	3766	3797	3926	3788	50.47	48.63	56.16	56.31	59.81	55.91
SK1G00040715	MergePeak_1328	quadrant5	no	1917	1645	1811	1879	2078	1931	2312	1882	2205	2056	2048	2671	2551	2252	2124	2993	2829	3093	2683	2630	2746	2656	3604	3249	3087	3103	3155	2835	3252	3710	3325	2921	3589	2805	3340	3911	3766	3797	3926	3788	50.47	48.63	56.16	56.31	59.81	55.91
SK1G00040717	MergePeak_1329	quadrant5	no	39	125	33	86	68	101	67	62	47	39	32	26	75	72	92	64	79	102	56	39	83	34	48	36	28	36	37	49	52	46	33	19	24	49	29	28	45	39	34	37	0.72	2.6	0.72	1.81	1.38	2.06
SK1G00040719	MergePeak_1330	quadrant5	no	948	753	807	763	920	634	767	752	766	855	749	1070	956	737	796	1583	1252	1345	1122	1005	1049	1048	1437	1050	952	750	754	966	1259	1169	1120	992	1419	1262	1283	1346	1193	1275	1391	1138	13.48	12.02	13.51	12.35	14.3	9.91
SK1G00040719	MergePeak_1331	quadrant5	no	948	753	807	763	920	634	767	752	766	855	749	1070	956	737	796	1583	1252	1345	1122	1005	1049	1048	1437	1050	952	750	754	966	1259	1169	1120	992	1419	1262	1283	1346	1193	1275	1391	1138	13.48	12.02	13.51	12.35	14.3	9.91
SK1G00040719	MergePeak_1332	quadrant5	no	948	753	807	763	920	634	767	752	766	855	749	1070	956	737	796	1583	1252	1345	1122	1005	1049	1048	1437	1050	952	750	754	966	1259	1169	1120	992	1419	1262	1283	1346	1193	1275	1391	1138	13.48	12.02	13.51	12.35	14.3	9.91
SK1G00040719	MergePeak_1333	quadrant5	no	948	753	807	763	920	634	767	752	766	855	749	1070	956	737	796	1583	1252	1345	1122	1005	1049	1048	1437	1050	952	750	754	966	1259	1169	1120	992	1419	1262	1283	1346	1193	1275	1391	1138	13.48	12.02	13.51	12.35	14.3	9.91
SK1G00040720	MergePeak_1334	quadrant5	no	320	243	202	247	244	303	286	238	254	266	237	297	300	298	280	315	350	321	332	331	302	296	429	361	337	331	297	346	394	409	367	322	372	348	325	459	348	492	448	452	9.22	7.86	6.86	8.1	7.69	9.6
SK1G00040720	MergePeak_1335	quadrant5	no	320	243	202	247	244	303	286	238	254	266	237	297	300	298	280	315	350	321	332	331	302	296	429	361	337	331	297	346	394	409	367	322	372	348	325	459	348	492	448	452	9.22	7.86	6.86	8.1	7.69	9.6
SK1G00040720	MergePeak_1336	quadrant5	no	320	243	202	247	244	303	286	238	254	266	237	297	300	298	280	315	350	321	332	331	302	296	429	361	337	331	297	346	394	409	367	322	372	348	325	459	348	492	448	452	9.22	7.86	6.86	8.1	7.69	9.6
SK1G00040720	MergePeak_1337	quadrant5	no	320	243	202	247	244	303	286	238	254	266	237	297	300	298	280	315	350	321	332	331	302	296	429	361	337	331	297	346	394	409	367	322	372	348	325	459	348	492	448	452	9.22	7.86	6.86	8.1	7.69	9.6
SK1G00040721	MergePeak_1338	quadrant5	no	486	501	344	487	482	643	410	439	537	397	423	540	522	557	538	567	743	613	467	507	548	413	601	603	393	391	351	387	443	537	448	432	424	385	359	470	490	491	502	712	18.98	21.97	15.82	21.65	20.58	27.62
SK1G00040721	MergePeak_1339	quadrant5	no	486	501	344	487	482	643	410	439	537	397	423	540	522	557	538	567	743	613	467	507	548	413	601	603	393	391	351	387	443	537	448	432	424	385	359	470	490	491	502	712	18.98	21.97	15.82	21.65	20.58	27.62
SK1G00040721	MergePeak_1340	quadrant5	no	486	501	344	487	482	643	410	439	537	397	423	540	522	557	538	567	743	613	467	507	548	413	601	603	393	391	351	387	443	537	448	432	424	385	359	470	490	491	502	712	18.98	21.97	15.82	21.65	20.58	27.62
SK1G00040722	MergePeak_1341	quadrant5	no	219	203	241	254	224	260	352	310	300	256	221	323	305	286	299	416	258	339	248	300	266	313	363	233	168	189	273	272	281	297	259	290	273	320	187	297	271	310	333	232	5.27	5.49	6.84	6.96	5.9	6.89
SK1G00040722	MergePeak_1342	quadrant5	no	219	203	241	254	224	260	352	310	300	256	221	323	305	286	299	416	258	339	248	300	266	313	363	233	168	189	273	272	281	297	259	290	273	320	187	297	271	310	333	232	5.27	5.49	6.84	6.96	5.9	6.89
SK1G00040727	MergePeak_1343	quadrant5	no	1075	972	828	832	893	999	969	765	849	811	743	882	1080	899	761	1039	1055	1101	875	874	956	858	1097	960	819	663	778	838	1055	1080	831	807	856	937	893	974	867	1077	1004	1068	33.48	33.99	30.37	29.5	30.4	34.22
SK1G00040727	MergePeak_1344	quadrant5	no	1075	972	828	832	893	999	969	765	849	811	743	882	1080	899	761	1039	1055	1101	875	874	956	858	1097	960	819	663	778	838	1055	1080	831	807	856	937	893	974	867	1077	1004	1068	33.48	33.99	30.37	29.5	30.4	34.22
SK1G00040728	MergePeak_1345	quadrant5	no	5354	3697	6855	6870	6510	5899	8339	6462	5251	4979	5018	8236	5128	4089	5656	8367	6492	6159	5456	5923	5247	3875	3758	2652	3169	4434	4606	2914	2235	3289	2928	3329	4236	2386	2691	2831	4940	2933	4736	3130	103.74	80.43	156.43	151.51	137.88	125.7
SK1G00040728	MergePeak_1346	quadrant5	no	5354	3697	6855	6870	6510	5899	8339	6462	5251	4979	5018	8236	5128	4089	5656	8367	6492	6159	5456	5923	5247	3875	3758	2652	3169	4434	4606	2914	2235	3289	2928	3329	4236	2386	2691	2831	4940	2933	4736	3130	103.74	80.43	156.43	151.51	137.88	125.7
SK1G00040729	MergePeak_1347	quadrant5	no	330	250	392	339	335	297	429	324	229	286	241	310	290	305	278	380	308	343	224	302	229	215	312	245	221	226	250	213	245	267	246	218	304	258	298	255	297	246	307	320	21.56	18.34	30.17	25.21	23.93	21.34
SK1G00040729	MergePeak_1348	quadrant5	no	330	250	392	339	335	297	429	324	229	286	241	310	290	305	278	380	308	343	224	302	229	215	312	245	221	226	250	213	245	267	246	218	304	258	298	255	297	246	307	320	21.56	18.34	30.17	25.21	23.93	21.34
SK1G00040733	MergePeak_1349	quadrant5	no	1850	1283	1545	1944	2470	2372	2945	2447	1749	1594	1906	2341	2136	1692	1792	2815	2437	2672	2303	2241	2313	2127	2183	2617	2680	2824	2596	2025	1882	2276	2807	2197	2861	1789	2429	2751	3210	3349	2777	2821	62.84	49.46	61.92	75.66	92.16	89.24
SK1G00040733	MergePeak_1350	quadrant5	no	1850	1283	1545	1944	2470	2372	2945	2447	1749	1594	1906	2341	2136	1692	1792	2815	2437	2672	2303	2241	2313	2127	2183	2617	2680	2824	2596	2025	1882	2276	2807	2197	2861	1789	2429	2751	3210	3349	2777	2821	62.84	49.46	61.92	75.66	92.16	89.24
SK1G00040733	MergePeak_1351	quadrant5	no	1850	1283	1545	1944	2470	2372	2945	2447	1749	1594	1906	2341	2136	1692	1792	2815	2437	2672	2303	2241	2313	2127	2183	2617	2680	2824	2596	2025	1882	2276	2807	2197	2861	1789	2429	2751	3210	3349	2777	2821	62.84	49.46	61.92	75.66	92.16	89.24
SK1G00040739	MergePeak_1352	quadrant5	no	892	781	873	654	760	760	774	627	760	714	600	722	991	719	780	1160	745	1029	672	998	715	887	719	608	291	418	410	529	729	699	621	642	806	746	620	831	760	594	782	567	12.45	12.24	14.35	10.39	11.59	11.66
SK1G00040739	MergePeak_1353	quadrant5	no	892	781	873	654	760	760	774	627	760	714	600	722	991	719	780	1160	745	1029	672	998	715	887	719	608	291	418	410	529	729	699	621	642	806	746	620	831	760	594	782	567	12.45	12.24	14.35	10.39	11.59	11.66
SK1G00040744	MergePeak_1354	quadrant5	no	8076	6801	6248	6313	7701	6329	6468	4503	4747	4688	5055	4758	6442	4165	4657	5298	4969	3971	3230	3417	3041	2258	5165	3647	2869	4299	3963	3080	2753	2414	3899	3529	3442	2472	3582	4004	4020	3292	4401	4400	578.8	547.31	527.38	514.99	603.32	498.85
SK1G00040744	MergePeak_1355	quadrant5	no	8076	6801	6248	6313	7701	6329	6468	4503	4747	4688	5055	4758	6442	4165	4657	5298	4969	3971	3230	3417	3041	2258	5165	3647	2869	4299	3963	3080	2753	2414	3899	3529	3442	2472	3582	4004	4020	3292	4401	4400	578.8	547.31	527.38	514.99	603.32	498.85
SK1G00040745	MergePeak_1355	quadrant5	no	440	440	425	342	449	353	400	360	403	394	382	479	479	398	430	591	542	642	456	447	465	466	695	490	613	476	428	494	551	580	619	524	635	529	576	655	606	637	646	695	11.83	13.28	13.45	10.46	13.19	10.43
SK1G00040745	MergePeak_1356	quadrant5	no	440	440	425	342	449	353	400	360	403	394	382	479	479	398	430	591	542	642	456	447	465	466	695	490	613	476	428	494	551	580	619	524	635	529	576	655	606	637	646	695	11.83	13.28	13.45	10.46	13.19	10.43
SK1G00040746	MergePeak_1357	quadrant5	no	1	0	0	0	1	3	1	2	0	0	0	1	0	0	1	3	1	4	1	4	0	3	0	0	2	0	0	0	1	0	4	3	5	0	1	0	0	2	0	0	0.28	0	0	0	0.31	0.94
SK1G00040747	MergePeak_1358	quadrant8	no	1707	1476	1384	1819	1897	1728	2290	1961	1328	1138	1458	1645	1622	863	1565	1767	1685	1730	1301	1282	1222	1061	1094	569	646	604	773	566	565	654	673	633	751	626	623	659	657	517	778	713	66.38	64.45	63.38	80.51	80.63	73.9
SK1G00040747	MergePeak_1359	quadrant8	no	1707	1476	1384	1819	1897	1728	2290	1961	1328	1138	1458	1645	1622	863	1565	1767	1685	1730	1301	1282	1222	1061	1094	569	646	604	773	566	565	654	673	633	751	626	623	659	657	517	778	713	66.38	64.45	63.38	80.51	80.63	73.9
SK1G00040747	MergePeak_1360	quadrant8	no	1707	1476	1384	1819	1897	1728	2290	1961	1328	1138	1458	1645	1622	863	1565	1767	1685	1730	1301	1282	1222	1061	1094	569	646	604	773	566	565	654	673	633	751	626	623	659	657	517	778	713	66.38	64.45	63.38	80.51	80.63	73.9
SK1G00040747	MergePeak_1361	quadrant8	no	1707	1476	1384	1819	1897	1728	2290	1961	1328	1138	1458	1645	1622	863	1565	1767	1685	1730	1301	1282	1222	1061	1094	569	646	604	773	566	565	654	673	633	751	626	623	659	657	517	778	713	66.38	64.45	63.38	80.51	80.63	73.9
SK1G00040749	MergePeak_1362	quadrant5	no	625	640	549	602	679	568	710	595	646	751	602	750	763	807	746	1018	927	1074	896	882	921	931	1214	1010	1039	1013	1026	977	1138	1184	1148	1024	1189	948	982	1316	1194	1174	1280	1276	19.35	22.25	20.02	21.21	22.98	19.34
SK1G00040751	MergePeak_1363	quadrant5	no	131	164	99	138	135	130	120	115	114	131	107	126	150	116	114	184	167	213	140	138	180	141	212	194	164	202	164	146	185	188	199	170	197	187	157	216	237	163	209	174	3.64	5.12	3.24	4.37	4.1	3.98
SK1G00040751	MergePeak_1364	quadrant5	no	131	164	99	138	135	130	120	115	114	131	107	126	150	116	114	184	167	213	140	138	180	141	212	194	164	202	164	146	185	188	199	170	197	187	157	216	237	163	209	174	3.64	5.12	3.24	4.37	4.1	3.98
SK1G00040751	MergePeak_1365	quadrant5	no	131	164	99	138	135	130	120	115	114	131	107	126	150	116	114	184	167	213	140	138	180	141	212	194	164	202	164	146	185	188	199	170	197	187	157	216	237	163	209	174	3.64	5.12	3.24	4.37	4.1	3.98
SK1G00040752	MergePeak_1366	quadrant5	no	798	628	891	767	976	826	1145	1010	1254	1205	1036	1625	1420	1301	1310	1702	1488	1841	1258	1606	1357	1256	1351	1205	1184	1247	1154	1307	1314	1363	1540	1417	1371	1372	1061	1792	1349	1404	1486	1291	22.26	19.67	29.27	24.35	29.75	25.34
SK1G00040752	MergePeak_1367	quadrant5	no	798	628	891	767	976	826	1145	1010	1254	1205	1036	1625	1420	1301	1310	1702	1488	1841	1258	1606	1357	1256	1351	1205	1184	1247	1154	1307	1314	1363	1540	1417	1371	1372	1061	1792	1349	1404	1486	1291	22.26	19.67	29.27	24.35	29.75	25.34
SK1G00040752	MergePeak_1368	quadrant5	no	798	628	891	767	976	826	1145	1010	1254	1205	1036	1625	1420	1301	1310	1702	1488	1841	1258	1606	1357	1256	1351	1205	1184	1247	1154	1307	1314	1363	1540	1417	1371	1372	1061	1792	1349	1404	1486	1291	22.26	19.67	29.27	24.35	29.75	25.34
SK1G00040760	MergePeak_1369	quadrant5	no	285	190	236	215	265	193	238	236	271	234	210	248	274	219	219	344	273	324	235	288	218	297	404	304	332	368	334	291	315	421	294	297	358	300	384	435	365	433	518	385	6.21	4.65	6.06	5.33	6.31	4.62
SK1G00040761	MergePeak_1370	quadrant5	no	300	276	297	279	303	293	312	345	345	272	269	363	337	310	293	358	416	365	288	357	291	329	468	391	340	404	347	339	395	427	367	341	407	333	433	442	344	391	457	419	11.15	11.52	13	11.8	12.31	11.98
SK1G00040761	MergePeak_1371	quadrant5	no	300	276	297	279	303	293	312	345	345	272	269	363	337	310	293	358	416	365	288	357	291	329	468	391	340	404	347	339	395	427	367	341	407	333	433	442	344	391	457	419	11.15	11.52	13	11.8	12.31	11.98
SK1G00040765	MergePeak_1372	quadrant5	no	69	39	43	45	52	41	81	52	62	63	62	69	65	50	44	76	80	88	66	94	62	64	71	47	69	62	60	65	61	55	64	49	50	66	73	85	75	64	50	75	1.8	1.14	1.32	1.33	1.48	1.17
SK1G00040765	MergePeak_1373	quadrant5	no	69	39	43	45	52	41	81	52	62	63	62	69	65	50	44	76	80	88	66	94	62	64	71	47	69	62	60	65	61	55	64	49	50	66	73	85	75	64	50	75	1.8	1.14	1.32	1.33	1.48	1.17
SK1G00040767	MergePeak_1374	quadrant5	no	2089	1831	2080	1749	1946	1694	1858	1587	1939	1868	1628	2012	2146	1775	1739	2429	1962	2581	2020	2049	2029	2147	3070	3291	3035	3695	3343	2771	3107	3510	3353	2722	3722	2569	3881	3995	3675	4402	4143	3764	98.79	97.22	115.84	94.14	100.59	88.1
SK1G00040767	MergePeak_1375	quadrant5	no	2089	1831	2080	1749	1946	1694	1858	1587	1939	1868	1628	2012	2146	1775	1739	2429	1962	2581	2020	2049	2029	2147	3070	3291	3035	3695	3343	2771	3107	3510	3353	2722	3722	2569	3881	3995	3675	4402	4143	3764	98.79	97.22	115.84	94.14	100.59	88.1
SK1G00040770	MergePeak_1376	quadrant5	no	20	10	11	16	4	10	4	5	8	6	11	8	17	6	22	5	11	6	13	22	23	19	15	38	21	28	16	15	14	22	19	15	28	16	15	14	24	17	20	27	2.53	1.42	1.64	2.3	0.55	1.39
SK1G00040772	MergePeak_1377	quadrant5	no	46	29	66	40	40	42	67	40	51	53	32	67	60	42	42	79	63	66	56	61	50	63	51	81	60	76	66	43	92	65	67	72	66	67	70	82	69	72	65	55	1.89	1.34	3.19	1.87	1.8	1.9
SK1G00040774	MergePeak_1378	quadrant5	no	498	354	447	413	536	466	538	460	683	600	488	523	626	592	576	855	611	854	654	744	571	695	732	644	453	762	619	669	746	786	882	735	851	683	758	925	724	841	875	754	16.64	13.28	17.59	15.7	19.57	17.12
SK1G00040774	MergePeak_1379	quadrant5	no	498	354	447	413	536	466	538	460	683	600	488	523	626	592	576	855	611	854	654	744	571	695	732	644	453	762	619	669	746	786	882	735	851	683	758	925	724	841	875	754	16.64	13.28	17.59	15.7	19.57	17.12
SK1G00040775	MergePeak_1380	quadrant5	no	217	181	133	176	163	180	151	137	105	138	147	87	196	208	156	272	166	206	122	192	170	219	234	263	73	133	122	133	240	294	158	185	193	181	168	253	145	179	227	204	5.17	4.84	3.73	4.77	4.25	4.72
SK1G00040775	MergePeak_1381	quadrant5	no	217	181	133	176	163	180	151	137	105	138	147	87	196	208	156	272	166	206	122	192	170	219	234	263	73	133	122	133	240	294	158	185	193	181	168	253	145	179	227	204	5.17	4.84	3.73	4.77	4.25	4.72
SK1G00040777	MergePeak_1382	quadrant5	no	166	241	139	330	295	461	277	312	254	194	218	195	397	381	364	273	355	331	232	218	389	174	385	381	174	265	213	224	226	215	202	168	237	230	221	245	256	317	242	241	3.06	4.99	3.02	6.93	5.95	9.35
SK1G00040777	MergePeak_1383	quadrant5	no	166	241	139	330	295	461	277	312	254	194	218	195	397	381	364	273	355	331	232	218	389	174	385	381	174	265	213	224	226	215	202	168	237	230	221	245	256	317	242	241	3.06	4.99	3.02	6.93	5.95	9.35
SK1G00040778	MergePeak_1384	quadrant5	no	127	118	113	112	139	129	107	76	92	106	104	115	108	107	107	159	124	114	114	118	89	96	158	174	155	140	102	116	157	133	144	138	153	123	177	178	137	159	195	176	3.46	3.6	3.62	3.47	4.13	3.86
SK1G00040778	MergePeak_1385	quadrant5	no	127	118	113	112	139	129	107	76	92	106	104	115	108	107	107	159	124	114	114	118	89	96	158	174	155	140	102	116	157	133	144	138	153	123	177	178	137	159	195	176	3.46	3.6	3.62	3.47	4.13	3.86
SK1G00040778	MergePeak_1386	quadrant5	no	127	118	113	112	139	129	107	76	92	106	104	115	108	107	107	159	124	114	114	118	89	96	158	174	155	140	102	116	157	133	144	138	153	123	177	178	137	159	195	176	3.46	3.6	3.62	3.47	4.13	3.86
SK1G00040778	MergePeak_1387	quadrant5	no	127	118	113	112	139	129	107	76	92	106	104	115	108	107	107	159	124	114	114	118	89	96	158	174	155	140	102	116	157	133	144	138	153	123	177	178	137	159	195	176	3.46	3.6	3.62	3.47	4.13	3.86
SK1G00040780	MergePeak_1388	quadrant5	no	14	11	9	8	11	18	25	15	18	13	22	19	27	29	20	36	24	28	19	16	21	21	21	24	18	34	29	20	27	33	17	30	25	34	31	39	29	35	24	29	1	0.89	0.76	0.65	0.86	1.42
SK1G00040781	MergePeak_1389	quadrant5	no	392	313	411	373	382	311	407	398	375	382	397	506	509	364	380	577	479	591	451	586	453	488	680	639	635	729	644	611	652	788	612	622	732	607	739	728	715	749	898	667	10.11	9.06	12.48	10.95	10.77	8.82
SK1G00040781	MergePeak_1390	quadrant5	no	392	313	411	373	382	311	407	398	375	382	397	506	509	364	380	577	479	591	451	586	453	488	680	639	635	729	644	611	652	788	612	622	732	607	739	728	715	749	898	667	10.11	9.06	12.48	10.95	10.77	8.82
SK1G00040781	MergePeak_1391	quadrant5	no	392	313	411	373	382	311	407	398	375	382	397	506	509	364	380	577	479	591	451	586	453	488	680	639	635	729	644	611	652	788	612	622	732	607	739	728	715	749	898	667	10.11	9.06	12.48	10.95	10.77	8.82
SK1G00040782	MergePeak_1392	quadrant8	no	140	958	147	381	413	420	190	235	218	85	124	86	380	289	485	152	322	231	87	178	261	63	280	109	84	46	63	87	117	98	55	39	31	45	26	25	67	42	29	82	5.25	40.34	6.49	16.26	16.93	17.32
SK1G00040789	MergePeak_1393	quadrant5	no	825	782	771	674	771	776	728	634	840	716	660	973	802	820	802	967	1104	1154	762	968	863	862	1224	993	966	866	720	911	1088	1159	954	984	1016	977	1017	1127	1050	1122	1243	1185	20.7	22.04	22.79	19.25	21.15	21.42
SK1G00040789	MergePeak_1394	quadrant5	no	825	782	771	674	771	776	728	634	840	716	660	973	802	820	802	967	1104	1154	762	968	863	862	1224	993	966	866	720	911	1088	1159	954	984	1016	977	1017	1127	1050	1122	1243	1185	20.7	22.04	22.79	19.25	21.15	21.42
SK1G00040789	MergePeak_1395	quadrant5	no	825	782	771	674	771	776	728	634	840	716	660	973	802	820	802	967	1104	1154	762	968	863	862	1224	993	966	866	720	911	1088	1159	954	984	1016	977	1017	1127	1050	1122	1243	1185	20.7	22.04	22.79	19.25	21.15	21.42
SK1G00040789	MergePeak_1396	quadrant5	no	825	782	771	674	771	776	728	634	840	716	660	973	802	820	802	967	1104	1154	762	968	863	862	1224	993	966	866	720	911	1088	1159	954	984	1016	977	1017	1127	1050	1122	1243	1185	20.7	22.04	22.79	19.25	21.15	21.42
SK1G00040790	MergePeak_1397	quadrant5	no	1	0	1	0	0	3	0	0	0	0	1	1	2	0	1	0	2	0	1	1	3	1	2	1	0	5	0	1	1	0	1	0	0	0	1	2	1	1	0	3	0.29	0	0.34	0	0	0.96
SK1G00040793	MergePeak_1398	quadrant2	no	36	56	37	47	43	64	57	80	72	64	118	88	93	78	116	119	157	151	91	121	172	141	216	257	276	234	244	241	248	196	233	209	324	196	384	380	237	327	295	311	2.78	4.81	3.35	4.09	3.59	5.38
SK1G00040795	MergePeak_1399	quadrant5	no	271	252	265	308	293	333	390	263	257	192	196	256	263	182	232	267	269	247	176	205	251	140	223	179	174	175	218	133	145	185	147	154	176	137	147	173	183	171	213	200	4.45	4.65	5.13	5.76	5.26	6.02
SK1G00040796	MergePeak_1400	quadrant5	no	366	326	220	287	294	286	244	180	240	213	245	300	255	195	219	331	303	337	244	232	240	237	212	169	129	109	142	180	290	233	185	173	208	198	181	221	234	245	243	311	31.59	31.59	22.36	28.19	27.74	27.15
SK1G00040799	MergePeak_1401	quadrant5	no	3975	3085	3299	2764	3396	2377	2555	2600	3197	3750	3090	4746	3299	2503	3337	4715	4560	5037	3460	3823	3585	3289	4799	3442	4627	3143	3024	3071	4081	4758	4375	3969	4650	3926	4857	5456	5023	4962	5519	4952	179.5	156.43	175.46	142.07	167.64	118.05
SK1G00040799	MergePeak_1402	quadrant5	no	3975	3085	3299	2764	3396	2377	2555	2600	3197	3750	3090	4746	3299	2503	3337	4715	4560	5037	3460	3823	3585	3289	4799	3442	4627	3143	3024	3071	4081	4758	4375	3969	4650	3926	4857	5456	5023	4962	5519	4952	179.5	156.43	175.46	142.07	167.64	118.05
SK1G00040799	MergePeak_1403	quadrant5	no	3975	3085	3299	2764	3396	2377	2555	2600	3197	3750	3090	4746	3299	2503	3337	4715	4560	5037	3460	3823	3585	3289	4799	3442	4627	3143	3024	3071	4081	4758	4375	3969	4650	3926	4857	5456	5023	4962	5519	4952	179.5	156.43	175.46	142.07	167.64	118.05
SK1G00040799	MergePeak_1404	quadrant5	no	3975	3085	3299	2764	3396	2377	2555	2600	3197	3750	3090	4746	3299	2503	3337	4715	4560	5037	3460	3823	3585	3289	4799	3442	4627	3143	3024	3071	4081	4758	4375	3969	4650	3926	4857	5456	5023	4962	5519	4952	179.5	156.43	175.46	142.07	167.64	118.05
SK1G00040801	MergePeak_1405	quadrant5	no	1060	851	953	860	1056	1142	1186	1056	1058	1098	1067	1316	1492	1214	1303	1716	1647	1752	1469	1576	1492	1444	1606	1375	1070	1339	1276	1334	1393	1494	1468	1289	1635	1475	1510	1895	1739	1555	1880	1777	24.98	22.52	26.45	23.07	27.2	29.59
SK1G00040802	MergePeak_1406	quadrant5	no	48	17	34	38	45	33	39	51	45	80	53	69	84	68	65	75	63	86	77	105	102	102	85	82	85	79	66	87	99	78	145	93	98	105	111	141	102	138	112	96	1.74	0.69	1.45	1.57	1.79	1.32
SK1G00040802	MergePeak_1407	quadrant5	no	48	17	34	38	45	33	39	51	45	80	53	69	84	68	65	75	63	86	77	105	102	102	85	82	85	79	66	87	99	78	145	93	98	105	111	141	102	138	112	96	1.74	0.69	1.45	1.57	1.79	1.32
SK1G00040804	MergePeak_1408	quadrant5	no	5726	4473	4884	5195	6572	6841	6422	6110	7037	7151	6507	8145	8861	7914	7548	9569	8906	10388	7811	8862	7873	7086	8681	7752	7140	7652	7529	6862	8322	9098	9683	8760	9293	8976	10864	11402	9745	9649	9591	10639	64.76	56.81	65.06	66.88	81.25	85.09
SK1G00040804	MergePeak_1409	quadrant5	no	5726	4473	4884	5195	6572	6841	6422	6110	7037	7151	6507	8145	8861	7914	7548	9569	8906	10388	7811	8862	7873	7086	8681	7752	7140	7652	7529	6862	8322	9098	9683	8760	9293	8976	10864	11402	9745	9649	9591	10639	64.76	56.81	65.06	66.88	81.25	85.09
SK1G00040804	MergePeak_1410	quadrant5	no	5726	4473	4884	5195	6572	6841	6422	6110	7037	7151	6507	8145	8861	7914	7548	9569	8906	10388	7811	8862	7873	7086	8681	7752	7140	7652	7529	6862	8322	9098	9683	8760	9293	8976	10864	11402	9745	9649	9591	10639	64.76	56.81	65.06	66.88	81.25	85.09
SK1G00040804	MergePeak_1411	quadrant5	no	5726	4473	4884	5195	6572	6841	6422	6110	7037	7151	6507	8145	8861	7914	7548	9569	8906	10388	7811	8862	7873	7086	8681	7752	7140	7652	7529	6862	8322	9098	9683	8760	9293	8976	10864	11402	9745	9649	9591	10639	64.76	56.81	65.06	66.88	81.25	85.09
SK1G00040808	MergePeak_1412	quadrant5	no	75	65	54	60	76	61	66	87	54	35	47	79	82	111	83	96	92	108	94	83	68	56	103	82	136	94	78	90	115	124	94	89	78	102	135	142	105	105	125	92	3.8	3.7	3.23	3.46	4.21	3.4
SK1G00040808	MergePeak_1413	quadrant5	no	75	65	54	60	76	61	66	87	54	35	47	79	82	111	83	96	92	108	94	83	68	56	103	82	136	94	78	90	115	124	94	89	78	102	135	142	105	105	125	92	3.8	3.7	3.23	3.46	4.21	3.4
SK1G00040813	MergePeak_1414	quadrant6	no	63	69	54	81	53	71	110	43	34	78	95	66	77	50	45	75	61	94	89	61	82	80	136	71	47	79	92	113	96	62	84	82	80	106	94	92	79	89	140	77	5.41	6.66	5.47	7.92	4.98	6.71
SK1G00040814	MergePeak_1415	quadrant8	no	0	2	1	1	11	4	4	1	2	2	3	0	0	2	8	1	5	0	0	0	1	0	0	1	0	0	2	0	0	0	0	1	2	1	0	0	0	0	1	0	0	0.09	0.05	0.04	0.46	0.17
SK1G00040818	MergePeak_1416	quadrant5	no	186	229	194	207	180	216	263	226	170	119	184	188	194	105	159	171	130	162	116	118	178	130	148	143	82	100	105	94	155	112	116	76	101	143	143	118	110	142	136	141	4.28	5.92	5.26	5.42	4.53	5.46
SK1G00040818	MergePeak_1417	quadrant5	no	186	229	194	207	180	216	263	226	170	119	184	188	194	105	159	171	130	162	116	118	178	130	148	143	82	100	105	94	155	112	116	76	101	143	143	118	110	142	136	141	4.28	5.92	5.26	5.42	4.53	5.46
SK1G00040821	MergePeak_1418	quadrant8	no	29	22	15	5	29	9	23	8	8	8	9	6	20	6	11	18	27	8	9	7	17	5	12	5	2	10	5	12	7	6	5	4	11	4	5	12	8	3	13	7	4.59	3.91	2.79	0.9	5.01	1.56
SK1G00040824	MergePeak_1419	quadrant5	no	49	116	27	75	88	83	47	63	37	40	46	42	49	34	90	48	101	55	51	43	53	36	77	36	29	32	42	20	29	25	33	21	29	33	25	29	45	41	17	60	1.35	3.59	0.88	2.35	2.65	2.51
SK1G00040829	MergePeak_1420	quadrant5	no	2582	2016	2321	2113	2325	1994	2264	2151	2044	1875	1647	2111	1888	1486	1574	2204	2015	2141	1840	1883	1641	1605	1722	1388	1364	1436	1347	1459	1614	1924	2007	1575	1845	1518	1777	1760	1814	1811	1916	1735	66.35	58.17	70.25	61.81	65.31	56.35
SK1G00040829	MergePeak_1421	quadrant5	no	2582	2016	2321	2113	2325	1994	2264	2151	2044	1875	1647	2111	1888	1486	1574	2204	2015	2141	1840	1883	1641	1605	1722	1388	1364	1436	1347	1459	1614	1924	2007	1575	1845	1518	1777	1760	1814	1811	1916	1735	66.35	58.17	70.25	61.81	65.31	56.35
SK1G00040829	MergePeak_1422	quadrant5	no	2582	2016	2321	2113	2325	1994	2264	2151	2044	1875	1647	2111	1888	1486	1574	2204	2015	2141	1840	1883	1641	1605	1722	1388	1364	1436	1347	1459	1614	1924	2007	1575	1845	1518	1777	1760	1814	1811	1916	1735	66.35	58.17	70.25	61.81	65.31	56.35
SK1G00040830	MergePeak_1423	quadrant5	no	121	133	144	117	99	109	121	107	143	125	104	136	159	128	107	124	116	139	147	150	131	139	187	183	177	200	195	170	226	254	190	190	198	162	264	237	243	186	273	286	4.4	5.44	6.17	4.85	3.94	4.36
SK1G00040836	MergePeak_1424	quadrant5	no	185	119	154	121	118	105	164	121	144	143	114	138	136	103	101	152	114	139	138	119	108	122	208	165	163	193	158	168	179	194	147	150	220	157	235	196	207	271	211	203	2.62	1.89	2.57	1.95	1.83	1.63
SK1G00040836	MergePeak_1425	quadrant5	no	185	119	154	121	118	105	164	121	144	143	114	138	136	103	101	152	114	139	138	119	108	122	208	165	163	193	158	168	179	194	147	150	220	157	235	196	207	271	211	203	2.62	1.89	2.57	1.95	1.83	1.63
SK1G00040838	MergePeak_1426	quadrant5	no	159	162	151	177	182	204	245	230	226	235	291	421	394	282	299	358	320	505	360	333	384	389	525	437	381	318	343	402	449	296	388	336	334	285	465	511	501	479	443	408	1.78	2.03	1.99	2.25	2.22	2.51
SK1G00040839	MergePeak_1427	quadrant5	no	1100	1046	935	1736	1384	1597	2430	2032	1216	1048	1353	1718	1649	935	1514	1759	1756	1516	1633	1463	1659	1378	1091	610	490	801	853	928	698	604	634	687	678	496	452	672	739	658	601	722	39.99	42.7	40.04	71.84	55.01	63.86
SK1G00040839	MergePeak_1428	quadrant4	no	1100	1046	935	1736	1384	1597	2430	2032	1216	1048	1353	1718	1649	935	1514	1759	1756	1516	1633	1463	1659	1378	1091	610	490	801	853	928	698	604	634	687	678	496	452	672	739	658	601	722	39.99	42.7	40.04	71.84	55.01	63.86
SK1G00040841	MergePeak_1429	quadrant5	no	6517	5574	6857	7208	7557	8216	9053	7772	7099	7177	7962	8489	10131	9338	7222	10130	8762	9626	9686	9331	8080	9167	11518	9777	8723	10054	10123	9504	11633	11778	11728	10230	13738	10278	10980	13713	11914	13201	14432	12255	172.02	165.21	213.17	216.57	218.05	238.51
SK1G00040841	MergePeak_1430	quadrant5	no	6517	5574	6857	7208	7557	8216	9053	7772	7099	7177	7962	8489	10131	9338	7222	10130	8762	9626	9686	9331	8080	9167	11518	9777	8723	10054	10123	9504	11633	11778	11728	10230	13738	10278	10980	13713	11914	13201	14432	12255	172.02	165.21	213.17	216.57	218.05	238.51
SK1G00040842	MergePeak_1431	quadrant5	no	365	329	360	268	383	227	302	266	345	337	312	395	344	318	312	532	394	514	333	437	339	396	497	515	426	585	555	436	502	509	587	489	600	485	664	690	642	706	735	547	29.23	29.58	33.95	24.43	33.52	19.99
SK1G00040842	MergePeak_1432	quadrant5	no	365	329	360	268	383	227	302	266	345	337	312	395	344	318	312	532	394	514	333	437	339	396	497	515	426	585	555	436	502	509	587	489	600	485	664	690	642	706	735	547	29.23	29.58	33.95	24.43	33.52	19.99
SK1G00040847	MergePeak_1433	quadrant5	no	130	109	126	90	133	129	147	127	118	97	152	128	188	178	129	157	150	121	122	152	113	141	177	133	94	116	129	164	176	145	137	120	155	138	147	155	147	189	149	156	3.71	3.49	4.23	2.92	4.15	4.05
SK1G00040849	MergePeak_1434	quadrant5	no	286	205	272	414	300	357	501	422	548	598	548	668	552	494	583	816	710	795	629	697	663	603	593	358	481	417	473	470	528	543	564	588	539	536	415	681	646	373	516	499	11.98	9.64	13.41	19.73	13.73	16.44
SK1G00040849	MergePeak_1435	quadrant5	no	286	205	272	414	300	357	501	422	548	598	548	668	552	494	583	816	710	795	629	697	663	603	593	358	481	417	473	470	528	543	564	588	539	536	415	681	646	373	516	499	11.98	9.64	13.41	19.73	13.73	16.44
SK1G00040849	MergePeak_1436	quadrant5	no	286	205	272	414	300	357	501	422	548	598	548	668	552	494	583	816	710	795	629	697	663	603	593	358	481	417	473	470	528	543	564	588	539	536	415	681	646	373	516	499	11.98	9.64	13.41	19.73	13.73	16.44
SK1G00040850	MergePeak_1437	quadrant5	no	531	535	585	416	531	464	539	437	575	463	422	520	509	496	509	735	662	590	493	540	568	611	776	754	616	714	621	605	667	648	775	650	799	572	780	782	712	828	919	841	28.87	32.66	37.46	25.74	31.55	27.74
SK1G00040852	MergePeak_1438	quadrant5	no	4	2	12	3	4	10	10	8	10	10	3	5	13	5	10	8	17	11	3	8	24	14	19	16	6	14	11	19	17	8	11	8	14	9	17	19	18	23	7	19	0.29	0.16	1.01	0.24	0.31	0.79
SK1G00040853	MergePeak_1439	quadrant5	no	47	28	33	26	44	19	29	24	25	27	22	30	42	30	36	28	29	45	29	41	27	36	51	39	29	40	29	31	68	45	46	44	43	40	42	33	48	55	62	54	1.96	1.31	1.62	1.24	2.01	0.87
SK1G00040853	MergePeak_1440	quadrant4	no	47	28	33	26	44	19	29	24	25	27	22	30	42	30	36	28	29	45	29	41	27	36	51	39	29	40	29	31	68	45	46	44	43	40	42	33	48	55	62	54	1.96	1.31	1.62	1.24	2.01	0.87
SK1G00040855	MergePeak_1441	quadrant5	no	482	443	526	556	595	588	744	606	692	723	662	795	775	665	767	1045	881	927	817	889	819	868	1013	825	775	848	739	809	977	892	755	824	893	962	879	1031	879	793	1002	1036	4.72	4.87	6.07	6.2	6.37	6.33
SK1G00040855	MergePeak_1442	quadrant5	no	482	443	526	556	595	588	744	606	692	723	662	795	775	665	767	1045	881	927	817	889	819	868	1013	825	775	848	739	809	977	892	755	824	893	962	879	1031	879	793	1002	1036	4.72	4.87	6.07	6.2	6.37	6.33
SK1G00040855	MergePeak_1443	quadrant5	no	482	443	526	556	595	588	744	606	692	723	662	795	775	665	767	1045	881	927	817	889	819	868	1013	825	775	848	739	809	977	892	755	824	893	962	879	1031	879	793	1002	1036	4.72	4.87	6.07	6.2	6.37	6.33
SK1G00040855	MergePeak_1444	quadrant5	no	482	443	526	556	595	588	744	606	692	723	662	795	775	665	767	1045	881	927	817	889	819	868	1013	825	775	848	739	809	977	892	755	824	893	962	879	1031	879	793	1002	1036	4.72	4.87	6.07	6.2	6.37	6.33
SK1G00040855	MergePeak_1445	quadrant6	no	482	443	526	556	595	588	744	606	692	723	662	795	775	665	767	1045	881	927	817	889	819	868	1013	825	775	848	739	809	977	892	755	824	893	962	879	1031	879	793	1002	1036	4.72	4.87	6.07	6.2	6.37	6.33
SK1G00040856	MergePeak_1446	quadrant5	no	2524	2232	1950	2223	2783	3125	3301	2646	2366	2338	2602	3144	2592	2125	2426	3505	3175	3257	2854	3137	3045	2206	2510	2162	1801	1931	1852	1648	2362	2301	2009	1861	1481	2517	1859	2091	1814	1612	2156	3459	171.97	170.76	156.47	172.4	207.27	234.16
SK1G00040857	MergePeak_1447	quadrant8	no	19493	20738	8201	16181	11948	23675	15168	10613	9011	8517	10986	8003	10903	9261	6981	13616	9409	11597	11114	7715	8693	8156	8065	7603	7066	5081	4407	5563	11484	10464	8038	7782	4608	5445	11527	6625	5399	8414	6497	15261	983.94	1175.41	487.55	929.67	659.26	1314.29
SK1G00040858	MergePeak_1448	quadrant5	no	1215	1058	1024	811	821	724	715	708	609	519	347	726	593	369	416	921	675	732	428	539	504	503	640	517	569	570	480	507	565	549	754	619	539	467	640	839	661	732	923	608	91.51	89.48	90.83	69.53	67.59	59.97
SK1G00040859	MergePeak_1449	quadrant5	no	151	122	105	128	116	143	137	113	101	129	148	158	179	144	118	148	148	141	153	133	133	192	238	173	195	204	162	155	198	189	166	131	199	152	177	213	184	229	243	238	15.64	14.19	12.81	15.09	13.13	16.29
SK1G00040862	MergePeak_1450	quadrant5	no	2773	2399	2131	1978	2127	1874	1667	1616	1948	1945	1495	2002	1871	1769	1828	2307	2375	2465	1540	1767	1678	1551	1912	1502	1356	1102	1018	1230	1576	1718	1571	1490	1480	1358	1456	1861	1471	1596	1780	1727	52.69	51.19	47.69	42.78	44.18	39.16
SK1G00040862	MergePeak_1451	quadrant5	no	2773	2399	2131	1978	2127	1874	1667	1616	1948	1945	1495	2002	1871	1769	1828	2307	2375	2465	1540	1767	1678	1551	1912	1502	1356	1102	1018	1230	1576	1718	1571	1490	1480	1358	1456	1861	1471	1596	1780	1727	52.69	51.19	47.69	42.78	44.18	39.16
SK1G00040865	MergePeak_1452	quadrant2	no	22	78	24	49	51	9	20	36	37	17	95	69	69	137	88	65	50	75	87	57	102	65	189	107	108	100	148	107	92	46	40	58	81	117	49	112	140	41	137	83	0.52	2.06	0.67	1.31	1.31	0.23
SK1G00040868	MergePeak_1453	quadrant5	no	20903	16370	21573	22299	23503	24019	30472	24639	35427	37680	32218	44635	36975	32738	33635	50064	44992	54395	51383	49804	52282	46822	62997	48039	52485	53721	52869	53088	56731	61012	59201	55211	69176	54271	58193	59688	69809	49655	72681	66984	378.56	332.9	460.14	459.67	465.29	478.4
SK1G00040868	MergePeak_1454	quadrant5	no	20903	16370	21573	22299	23503	24019	30472	24639	35427	37680	32218	44635	36975	32738	33635	50064	44992	54395	51383	49804	52282	46822	62997	48039	52485	53721	52869	53088	56731	61012	59201	55211	69176	54271	58193	59688	69809	49655	72681	66984	378.56	332.9	460.14	459.67	465.29	478.4
SK1G00040871	MergePeak_1455	quadrant5	no	51	45	36	53	41	59	55	30	51	57	59	63	73	45	39	55	45	71	62	78	70	61	51	70	50	71	79	51	59	72	74	79	61	78	89	99	77	79	80	69	3.27	3.24	2.72	3.87	2.87	4.16
SK1G00040874	MergePeak_1456	quadrant5	no	528	871	497	723	698	812	824	586	508	373	391	439	746	612	597	572	672	650	517	445	597	357	548	441	390	383	467	371	502	490	358	298	302	358	451	337	342	449	378	527	9.75	18.05	10.81	15.19	14.09	16.49
SK1G00040876	MergePeak_1457	quadrant5	no	7	1	6	11	9	7	1	5	2	7	5	3	9	7	11	7	6	13	13	13	8	13	8	4	7	7	3	9	1	8	5	8	12	9	14	7	4	6	4	6	0.82	0.13	0.83	1.47	1.15	0.9
SK1G00040879	MergePeak_1458	quadrant5	no	228	707	238	385	388	395	357	301	240	295	268	261	469	285	418	355	295	372	277	245	373	284	448	383	232	269	269	259	362	330	264	217	338	261	368	298	393	405	307	406	7.74	26.94	9.51	14.87	14.39	14.74
SK1G00040879	MergePeak_1459	quadrant5	no	228	707	238	385	388	395	357	301	240	295	268	261	469	285	418	355	295	372	277	245	373	284	448	383	232	269	269	259	362	330	264	217	338	261	368	298	393	405	307	406	7.74	26.94	9.51	14.87	14.39	14.74
SK1G00040882	MergePeak_1460	quadrant5	no	1121	1744	811	1496	1332	1560	1439	1018	900	1080	995	953	1347	1025	1243	1286	1217	1347	1242	937	1197	978	1275	930	1023	800	843	840	1142	983	798	694	1005	852	827	885	958	967	1090	1204	38.38	67.04	32.7	58.3	49.85	58.74
SK1G00040882	MergePeak_1461	quadrant5	no	1121	1744	811	1496	1332	1560	1439	1018	900	1080	995	953	1347	1025	1243	1286	1217	1347	1242	937	1197	978	1275	930	1023	800	843	840	1142	983	798	694	1005	852	827	885	958	967	1090	1204	38.38	67.04	32.7	58.3	49.85	58.74
SK1G00040882	MergePeak_1462	quadrant5	no	1121	1744	811	1496	1332	1560	1439	1018	900	1080	995	953	1347	1025	1243	1286	1217	1347	1242	937	1197	978	1275	930	1023	800	843	840	1142	983	798	694	1005	852	827	885	958	967	1090	1204	38.38	67.04	32.7	58.3	49.85	58.74
SK1G00040885	MergePeak_1463	quadrant5	no	3111	3192	2734	5379	5816	6688	8433	7647	6456	7256	7712	8757	9590	5832	8155	9378	10118	10650	7981	7288	8895	7041	6074	4396	4210	5731	6320	4480	4442	4282	5265	5036	5172	4186	4398	5551	8426	4698	6494	5770	101.96	117.46	105.53	200.65	208.36	241.05
SK1G00040885	MergePeak_1464	quadrant5	no	3111	3192	2734	5379	5816	6688	8433	7647	6456	7256	7712	8757	9590	5832	8155	9378	10118	10650	7981	7288	8895	7041	6074	4396	4210	5731	6320	4480	4442	4282	5265	5036	5172	4186	4398	5551	8426	4698	6494	5770	101.96	117.46	105.53	200.65	208.36	241.05
SK1G00040885	MergePeak_1465	quadrant5	no	3111	3192	2734	5379	5816	6688	8433	7647	6456	7256	7712	8757	9590	5832	8155	9378	10118	10650	7981	7288	8895	7041	6074	4396	4210	5731	6320	4480	4442	4282	5265	5036	5172	4186	4398	5551	8426	4698	6494	5770	101.96	117.46	105.53	200.65	208.36	241.05
SK1G00040885	MergePeak_1466	quadrant5	no	3111	3192	2734	5379	5816	6688	8433	7647	6456	7256	7712	8757	9590	5832	8155	9378	10118	10650	7981	7288	8895	7041	6074	4396	4210	5731	6320	4480	4442	4282	5265	5036	5172	4186	4398	5551	8426	4698	6494	5770	101.96	117.46	105.53	200.65	208.36	241.05
SK1G00040886	MergePeak_1467	quadrant5	no	1801	1411	2072	2987	2154	2391	3288	2654	2866	2912	2228	4162	2356	2038	2137	3181	2672	2613	2600	1884	2242	1533	1143	783	1143	1333	1320	959	677	857	1104	1249	1095	837	740	978	2313	742	1220	1231	43.17	37.98	58.5	81.5	56.45	63.04
SK1G00040886	MergePeak_1468	quadrant5	no	1801	1411	2072	2987	2154	2391	3288	2654	2866	2912	2228	4162	2356	2038	2137	3181	2672	2613	2600	1884	2242	1533	1143	783	1143	1333	1320	959	677	857	1104	1249	1095	837	740	978	2313	742	1220	1231	43.17	37.98	58.5	81.5	56.45	63.04
SK1G00040886	MergePeak_1469	quadrant5	no	1801	1411	2072	2987	2154	2391	3288	2654	2866	2912	2228	4162	2356	2038	2137	3181	2672	2613	2600	1884	2242	1533	1143	783	1143	1333	1320	959	677	857	1104	1249	1095	837	740	978	2313	742	1220	1231	43.17	37.98	58.5	81.5	56.45	63.04
SK1G00040888	MergePeak_1470	quadrant5	no	385	239	311	253	325	256	297	279	293	345	323	353	420	569	363	475	404	553	335	533	363	450	698	644	504	602	555	432	624	517	521	490	556	498	495	762	514	529	592	692	8.78	6.12	8.35	6.56	8.1	6.42
SK1G00040888	MergePeak_1471	quadrant5	no	385	239	311	253	325	256	297	279	293	345	323	353	420	569	363	475	404	553	335	533	363	450	698	644	504	602	555	432	624	517	521	490	556	498	495	762	514	529	592	692	8.78	6.12	8.35	6.56	8.1	6.42
SK1G00040888	MergePeak_1472	quadrant5	no	385	239	311	253	325	256	297	279	293	345	323	353	420	569	363	475	404	553	335	533	363	450	698	644	504	602	555	432	624	517	521	490	556	498	495	762	514	529	592	692	8.78	6.12	8.35	6.56	8.1	6.42
SK1G00040892	MergePeak_1473	quadrant5	no	209	191	213	168	208	177	212	183	184	160	167	224	203	254	172	313	197	237	240	244	208	260	326	363	303	282	287	264	354	327	306	322	342	243	350	345	298	397	407	346	10.88	11.16	13.06	9.95	11.83	10.13
SK1G00040892	MergePeak_1474	quadrant5	no	209	191	213	168	208	177	212	183	184	160	167	224	203	254	172	313	197	237	240	244	208	260	326	363	303	282	287	264	354	327	306	322	342	243	350	345	298	397	407	346	10.88	11.16	13.06	9.95	11.83	10.13
SK1G00040892	MergePeak_1475	quadrant5	no	209	191	213	168	208	177	212	183	184	160	167	224	203	254	172	313	197	237	240	244	208	260	326	363	303	282	287	264	354	327	306	322	342	243	350	345	298	397	407	346	10.88	11.16	13.06	9.95	11.83	10.13
SK1G00040896	MergePeak_1476	quadrant5	no	97	115	88	107	106	104	139	81	83	70	75	87	60	97	70	63	87	84	108	77	84	70	124	123	154	119	77	74	111	103	87	100	86	83	93	92	114	100	122	103	2	2.66	2.13	2.51	2.38	2.35
SK1G00040900	MergePeak_1477	quadrant5	no	57	43	33	34	31	53	59	45	37	38	47	63	52	46	44	71	50	66	41	35	46	73	82	59	66	57	56	46	55	73	59	59	71	61	36	90	63	67	81	74	5.68	4.81	3.87	3.85	3.37	5.8
SK1G00040900	MergePeak_1478	quadrant5	no	57	43	33	34	31	53	59	45	37	38	47	63	52	46	44	71	50	66	41	35	46	73	82	59	66	57	56	46	55	73	59	59	71	61	36	90	63	67	81	74	5.68	4.81	3.87	3.85	3.37	5.8
SK1G00040900	MergePeak_1479	quadrant5	no	57	43	33	34	31	53	59	45	37	38	47	63	52	46	44	71	50	66	41	35	46	73	82	59	66	57	56	46	55	73	59	59	71	61	36	90	63	67	81	74	5.68	4.81	3.87	3.85	3.37	5.8
SK1G00040902	MergePeak_1480	quadrant8	no	1664	1250	1161	762	904	474	506	432	292	311	817	591	645	417	433	895	675	392	307	501	224	200	785	358	197	251	205	398	356	454	270	389	574	245	268	439	477	164	1458	378	70.15	59.17	57.64	36.56	41.66	21.98
SK1G00040902	MergePeak_1481	quadrant8	no	1664	1250	1161	762	904	474	506	432	292	311	817	591	645	417	433	895	675	392	307	501	224	200	785	358	197	251	205	398	356	454	270	389	574	245	268	439	477	164	1458	378	70.15	59.17	57.64	36.56	41.66	21.98
SK1G00040904	MergePeak_1482	quadrant5	no	219	267	212	271	305	245	289	220	262	297	260	265	394	285	253	364	285	417	373	331	342	295	406	365	277	349	373	368	413	376	336	343	386	388	323	471	446	360	460	446	2.74	3.76	3.13	3.87	4.18	3.38
SK1G00040910	MergePeak_1483	quadrant2	no	413	298	692	748	547	886	1215	1016	1741	970	1315	2123	2155	2119	1867	1892	1898	3028	2326	2026	2296	1723	2238	2304	2474	4171	3619	2338	2296	2410	2374	2089	1940	2037	2855	2401	2316	3551	2013	3026	21.78	17.65	42.99	44.91	31.54	51.4
SK1G00040913	MergePeak_1484	quadrant5	no	49	46	43	27	58	77	61	91	72	43	43	53	68	68	50	66	63	58	61	58	47	43	70	49	40	74	56	51	53	54	39	53	41	44	73	55	53	32	67	54	3.24	3.42	3.35	2.03	4.2	5.6
SK1G00040915	MergePeak_1485	quadrant5	no	334	202	245	224	242	238	164	192	205	201	186	218	204	283	250	301	289	295	186	256	249	209	272	209	172	158	157	128	250	217	182	210	192	183	167	320	239	228	191	239	15.04	10.21	12.99	11.48	11.91	11.79
SK1G00040920	MergePeak_1486	quadrant5	no	206	162	196	240	256	206	403	401	251	221	378	563	405	275	440	554	529	474	691	418	714	419	547	333	410	450	524	441	308	368	434	391	354	254	319	350	438	323	333	318	9.53	6.84	10.97	11.24	11.6	9.71
SK1G00040920	MergePeak_1487	quadrant5	no	206	162	196	240	256	206	403	401	251	221	378	563	405	275	440	554	529	474	691	418	714	419	547	333	410	450	524	441	308	368	434	391	354	254	319	350	438	323	333	318	9.53	6.84	10.97	11.24	11.6	9.71
SK1G00040921	MergePeak_1488	quadrant5	no	241	260	209	234	252	277	249	229	182	194	255	252	323	256	269	338	341	373	297	290	336	254	403	324	337	342	322	256	360	379	254	276	325	318	289	342	366	338	376	440	10.57	12.8	10.79	11.68	12.08	13.36
SK1G00040921	MergePeak_1489	quadrant5	no	241	260	209	234	252	277	249	229	182	194	255	252	323	256	269	338	341	373	297	290	336	254	403	324	337	342	322	256	360	379	254	276	325	318	289	342	366	338	376	440	10.57	12.8	10.79	11.68	12.08	13.36
SK1G00040922	MergePeak_1490	quadrant5	no	45409	34478	38582	34411	38590	32001	32171	31637	33745	36709	29052	39342	30532	28388	31577	45663	39559	43586	31405	37898	32007	30776	34072	27456	22422	23871	22070	26202	31582	34286	31358	30276	32663	28445	28812	36380	31059	29569	30279	32260	830.85	708.35	831.42	716.65	771.83	643.95
SK1G00040922	MergePeak_1491	quadrant5	no	45409	34478	38582	34411	38590	32001	32171	31637	33745	36709	29052	39342	30532	28388	31577	45663	39559	43586	31405	37898	32007	30776	34072	27456	22422	23871	22070	26202	31582	34286	31358	30276	32663	28445	28812	36380	31059	29569	30279	32260	830.85	708.35	831.42	716.65	771.83	643.95
SK1G00040923	MergePeak_1492	quadrant5	no	7	11	12	2	4	3	6	1	4	1	5	1	2	6	10	9	3	4	7	5	8	1	5	11	11	17	6	7	8	7	3	7	8	4	16	14	8	5	10	9	1.24	2.19	2.5	0.4	0.77	0.58
SK1G00040926	MergePeak_1493	quadrant5	no	623	489	587	495	581	543	564	553	610	622	568	816	731	684	656	903	895	910	855	879	851	836	1312	1057	1079	1088	1036	1059	1258	1294	1143	1084	1128	1068	1190	1310	1218	1324	1466	1347	20.94	18.45	23.23	18.93	21.34	20.07
SK1G00040926	MergePeak_1494	quadrant4	no	623	489	587	495	581	543	564	553	610	622	568	816	731	684	656	903	895	910	855	879	851	836	1312	1057	1079	1088	1036	1059	1258	1294	1143	1084	1128	1068	1190	1310	1218	1324	1466	1347	20.94	18.45	23.23	18.93	21.34	20.07
SK1G00040927	MergePeak_1495	quadrant5	no	744	569	639	671	742	591	640	539	571	548	508	639	528	559	502	763	621	735	534	589	547	618	839	631	587	604	627	554	764	744	647	603	825	647	670	833	705	770	824	677	24.92	21.4	25.21	25.58	27.17	21.77
SK1G00040927	MergePeak_1496	quadrant5	no	744	569	639	671	742	591	640	539	571	548	508	639	528	559	502	763	621	735	534	589	547	618	839	631	587	604	627	554	764	744	647	603	825	647	670	833	705	770	824	677	24.92	21.4	25.21	25.58	27.17	21.77
SK1G00040928	MergePeak_1497	quadrant8	no	3560	3259	2718	2950	2950	3026	3445	2445	2151	1915	1711	1995	1878	1280	1467	2100	1919	1944	1670	1549	1325	1441	1623	1317	1160	1484	1615	1340	1651	1472	1357	1295	1570	1135	1701	1491	1303	1890	1614	1877	117.54	120.82	105.69	110.86	106.47	109.88
SK1G00040928	MergePeak_1498	quadrant8	no	3560	3259	2718	2950	2950	3026	3445	2445	2151	1915	1711	1995	1878	1280	1467	2100	1919	1944	1670	1549	1325	1441	1623	1317	1160	1484	1615	1340	1651	1472	1357	1295	1570	1135	1701	1491	1303	1890	1614	1877	117.54	120.82	105.69	110.86	106.47	109.88
SK1G00040930	MergePeak_1499	quadrant4	no	7	0	7	4	4	2	3	3	1	3	6	4	5	11	5	6	9	4	5	3	9	5	13	7	1	4	3	8	4	6	8	7	9	1	2	19	7	3	16	2	1.16	0	1.37	0.75	0.72	0.36
SK1G00040933	MergePeak_1500	quadrant5	no	1137	995	1160	994	1182	990	1078	1011	1104	1193	1048	1323	1231	960	949	1497	1265	1436	1144	1177	1132	1187	1389	1200	1317	1215	1321	1128	1344	1379	1452	1241	1559	1243	1466	1569	1475	1592	1650	1492	37.36	36.71	44.89	37.18	42.46	35.78
SK1G00040933	MergePeak_1501	quadrant5	no	1137	995	1160	994	1182	990	1078	1011	1104	1193	1048	1323	1231	960	949	1497	1265	1436	1144	1177	1132	1187	1389	1200	1317	1215	1321	1128	1344	1379	1452	1241	1559	1243	1466	1569	1475	1592	1650	1492	37.36	36.71	44.89	37.18	42.46	35.78
SK1G00040934	MergePeak_1502	quadrant5	no	3156	3221	2988	3184	3269	2869	3398	3020	3638	3649	3365	3238	3504	2960	2902	4346	3583	4891	3991	3744	4396	4264	5629	5455	5712	6474	5873	5795	5757	5669	5812	4998	6175	4761	6045	6003	6491	6148	6772	6765	48.36	55.42	53.93	55.53	54.76	48.35
SK1G00040934	MergePeak_1503	quadrant5	no	3156	3221	2988	3184	3269	2869	3398	3020	3638	3649	3365	3238	3504	2960	2902	4346	3583	4891	3991	3744	4396	4264	5629	5455	5712	6474	5873	5795	5757	5669	5812	4998	6175	4761	6045	6003	6491	6148	6772	6765	48.36	55.42	53.93	55.53	54.76	48.35
SK1G00040934	MergePeak_1504	quadrant5	no	3156	3221	2988	3184	3269	2869	3398	3020	3638	3649	3365	3238	3504	2960	2902	4346	3583	4891	3991	3744	4396	4264	5629	5455	5712	6474	5873	5795	5757	5669	5812	4998	6175	4761	6045	6003	6491	6148	6772	6765	48.36	55.42	53.93	55.53	54.76	48.35
SK1G00040934	MergePeak_1505	quadrant5	no	3156	3221	2988	3184	3269	2869	3398	3020	3638	3649	3365	3238	3504	2960	2902	4346	3583	4891	3991	3744	4396	4264	5629	5455	5712	6474	5873	5795	5757	5669	5812	4998	6175	4761	6045	6003	6491	6148	6772	6765	48.36	55.42	53.93	55.53	54.76	48.35
SK1G00040934	MergePeak_1506	quadrant5	no	3156	3221	2988	3184	3269	2869	3398	3020	3638	3649	3365	3238	3504	2960	2902	4346	3583	4891	3991	3744	4396	4264	5629	5455	5712	6474	5873	5795	5757	5669	5812	4998	6175	4761	6045	6003	6491	6148	6772	6765	48.36	55.42	53.93	55.53	54.76	48.35
SK1G00040935	MergePeak_1507	quadrant5	no	501	432	505	612	592	580	702	614	490	416	513	589	432	385	470	658	558	574	590	473	492	396	489	349	428	528	482	363	345	444	385	324	454	260	381	411	484	423	402	397	24.77	23.98	29.4	34.43	31.99	31.53
SK1G00040935	MergePeak_1508	quadrant5	no	501	432	505	612	592	580	702	614	490	416	513	589	432	385	470	658	558	574	590	473	492	396	489	349	428	528	482	363	345	444	385	324	454	260	381	411	484	423	402	397	24.77	23.98	29.4	34.43	31.99	31.53
SK1G00040938	MergePeak_1509	quadrant5	no	410	309	408	473	476	504	686	598	460	484	568	654	601	479	525	816	731	793	620	586	627	588	590	438	471	613	526	452	508	540	514	557	743	466	476	614	744	552	695	585	25.12	21.26	29.45	32.99	31.89	33.97
SK1G00040940	MergePeak_1510	quadrant5	no	368	380	349	313	381	305	405	320	417	377	355	417	498	412	332	492	498	476	439	437	379	378	606	525	449	505	475	435	481	547	437	484	560	426	586	551	433	616	680	641	24.8	28.76	27.7	24.01	28.07	22.61
SK1G00040940	MergePeak_1511	quadrant5	no	368	380	349	313	381	305	405	320	417	377	355	417	498	412	332	492	498	476	439	437	379	378	606	525	449	505	475	435	481	547	437	484	560	426	586	551	433	616	680	641	24.8	28.76	27.7	24.01	28.07	22.61
SK1G00040941	MergePeak_1512	quadrant5	no	73	62	33	61	74	90	90	67	88	57	75	88	113	103	76	89	78	101	75	90	89	97	130	125	108	132	83	129	101	110	94	97	91	137	129	143	147	113	129	156	4.17	3.98	2.22	3.97	4.62	5.66
SK1G00040942	MergePeak_1513	quadrant5	no	1495	1473	1478	1641	1626	1694	1784	1491	1540	1543	1605	1836	2111	1923	1673	2261	2055	2604	2198	2165	2299	2184	3457	3302	3217	3126	2960	2745	3237	3293	2960	2619	3289	2593	3133	3571	3588	3825	3928	3883	37.8	41.82	43.99	47.23	44.95	47.11
SK1G00040942	MergePeak_1514	quadrant5	no	1495	1473	1478	1641	1626	1694	1784	1491	1540	1543	1605	1836	2111	1923	1673	2261	2055	2604	2198	2165	2299	2184	3457	3302	3217	3126	2960	2745	3237	3293	2960	2619	3289	2593	3133	3571	3588	3825	3928	3883	37.8	41.82	43.99	47.23	44.95	47.11
SK1G00040942	MergePeak_1515	quadrant5	no	1495	1473	1478	1641	1626	1694	1784	1491	1540	1543	1605	1836	2111	1923	1673	2261	2055	2604	2198	2165	2299	2184	3457	3302	3217	3126	2960	2745	3237	3293	2960	2619	3289	2593	3133	3571	3588	3825	3928	3883	37.8	41.82	43.99	47.23	44.95	47.11
SK1G00040943	MergePeak_1516	quadrant5	no	72	82	63	91	78	77	94	92	108	69	112	108	132	106	102	143	125	140	133	129	139	150	190	193	126	161	131	158	192	154	138	143	155	125	129	184	173	177	203	191	3.22	4.11	3.31	4.63	3.81	3.78
SK1G00040943	MergePeak_1517	quadrant5	no	72	82	63	91	78	77	94	92	108	69	112	108	132	106	102	143	125	140	133	129	139	150	190	193	126	161	131	158	192	154	138	143	155	125	129	184	173	177	203	191	3.22	4.11	3.31	4.63	3.81	3.78
SK1G00040943	MergePeak_1518	quadrant5	no	72	82	63	91	78	77	94	92	108	69	112	108	132	106	102	143	125	140	133	129	139	150	190	193	126	161	131	158	192	154	138	143	155	125	129	184	173	177	203	191	3.22	4.11	3.31	4.63	3.81	3.78
SK1G00040944	MergePeak_1519	quadrant6	no	217	173	183	179	186	201	227	193	178	176	186	246	242	221	212	277	293	338	260	288	292	287	351	389	398	405	405	356	384	386	429	354	465	358	389	447	466	532	505	580	10.26	9.19	10.19	9.63	9.61	10.45
SK1G00040945	MergePeak_1520	quadrant5	no	485	390	428	405	464	423	471	403	466	418	430	642	559	451	390	603	538	616	520	488	492	500	579	590	529	594	522	560	649	640	644	612	595	551	554	767	632	709	819	714	25.32	22.87	26.32	24.07	26.48	24.29
SK1G00040945	MergePeak_1521	quadrant5	no	485	390	428	405	464	423	471	403	466	418	430	642	559	451	390	603	538	616	520	488	492	500	579	590	529	594	522	560	649	640	644	612	595	551	554	767	632	709	819	714	25.32	22.87	26.32	24.07	26.48	24.29
SK1G00040946	MergePeak_1522	quadrant4	no	6	2	5	3	8	8	5	5	4	0	6	7	11	4	3	11	5	1	7	5	6	7	13	3	3	3	7	5	5	2	5	3	4	3	0	11	12	2	6	4	0.18	0.07	0.18	0.1	0.27	0.27
SK1G00040947	MergePeak_1523	quadrant5	no	1474	1290	1323	1486	1404	1530	1664	1392	1369	1477	1488	1804	1921	1623	1521	2209	1817	2128	1938	1859	1773	1982	2301	2211	2007	1934	1997	1889	2285	2084	2204	1949	2447	1918	2234	2695	2498	2497	2491	2509	82.44	81.01	87.15	94.6	85.84	94.11
SK1G00040947	MergePeak_1524	quadrant5	no	1474	1290	1323	1486	1404	1530	1664	1392	1369	1477	1488	1804	1921	1623	1521	2209	1817	2128	1938	1859	1773	1982	2301	2211	2007	1934	1997	1889	2285	2084	2204	1949	2447	1918	2234	2695	2498	2497	2491	2509	82.44	81.01	87.15	94.6	85.84	94.11
SK1G00040948	MergePeak_1525	quadrant5	no	196	156	179	258	303	385	525	393	276	352	391	389	388	236	405	435	532	557	491	369	493	386	252	176	256	249	319	204	216	157	190	189	189	141	169	216	310	168	200	220	6.43	5.74	6.91	9.63	10.86	13.88
SK1G00040948	MergePeak_1526	quadrant5	no	196	156	179	258	303	385	525	393	276	352	391	389	388	236	405	435	532	557	491	369	493	386	252	176	256	249	319	204	216	157	190	189	189	141	169	216	310	168	200	220	6.43	5.74	6.91	9.63	10.86	13.88
SK1G00040953	MergePeak_1527	quadrant8	no	4739	3957	5316	5482	5527	4721	5796	4510	3665	3514	3124	4331	3111	2698	3270	5005	3906	3419	2883	3190	2624	2258	3195	1907	2184	2057	2295	1910	2008	2317	1989	2194	2466	2012	1826	2471	2506	2084	2712	2234	76.66	71.88	101.28	100.94	97.74	83.99
SK1G00040953	MergePeak_1528	quadrant8	no	4739	3957	5316	5482	5527	4721	5796	4510	3665	3514	3124	4331	3111	2698	3270	5005	3906	3419	2883	3190	2624	2258	3195	1907	2184	2057	2295	1910	2008	2317	1989	2194	2466	2012	1826	2471	2506	2084	2712	2234	76.66	71.88	101.28	100.94	97.74	83.99
SK1G00040957	MergePeak_1529	quadrant5	no	23	20	12	9	10	15	20	9	9	12	10	12	15	9	8	10	18	17	6	17	22	18	15	18	17	10	15	19	18	14	10	14	18	21	17	15	17	15	7	21	2.58	2.51	1.58	1.15	1.22	1.85
SK1G00040957	MergePeak_1530	quadrant5	no	23	20	12	9	10	15	20	9	9	12	10	12	15	9	8	10	18	17	6	17	22	18	15	18	17	10	15	19	18	14	10	14	18	21	17	15	17	15	7	21	2.58	2.51	1.58	1.15	1.22	1.85
SK1G00040959	MergePeak_1531	quadrant5	no	810	652	743	848	881	857	1349	988	691	608	1087	976	1109	519	872	1093	1036	1018	844	791	929	731	824	425	560	805	632	483	368	268	314	459	429	271	279	248	307	184	357	383	35.39	31.99	38.24	42.18	42.08	41.18
SK1G00040960	MergePeak_1532	quadrant2	no	0	0	0	0	0	0	0	0	0	0	0	0	0	0	0	0	0	0	0	0	0	0	0	0	0	0	0	0	0	0	0	0	0	0	0	0	0	0	1	0	0	0	0	0	0	0
SK1G00040960	MergePeak_1533	quadrant2	no	0	0	0	0	0	0	0	0	0	0	0	0	0	0	0	0	0	0	0	0	0	0	0	0	0	0	0	0	0	0	0	0	0	0	0	0	0	0	1	0	0	0	0	0	0	0
SK1G00040961	MergePeak_1534	quadrant5	no	294	434	280	341	318	290	257	272	293	212	240	383	434	481	417	512	630	617	278	412	425	359	520	474	388	320	243	338	425	387	408	439	426	347	311	485	462	413	486	520	15.16	25.13	17	20	17.93	16.45
SK1G00040961	MergePeak_1535	quadrant5	no	294	434	280	341	318	290	257	272	293	212	240	383	434	481	417	512	630	617	278	412	425	359	520	474	388	320	243	338	425	387	408	439	426	347	311	485	462	413	486	520	15.16	25.13	17	20	17.93	16.45
SK1G00040961	MergePeak_1536	quadrant5	no	294	434	280	341	318	290	257	272	293	212	240	383	434	481	417	512	630	617	278	412	425	359	520	474	388	320	243	338	425	387	408	439	426	347	311	485	462	413	486	520	15.16	25.13	17	20	17.93	16.45
SK1G00040964	MergePeak_1537	quadrant5	no	26	28	24	52	26	50	65	32	29	28	32	54	39	31	30	58	49	24	27	19	33	18	35	15	29	35	27	34	15	20	23	29	28	22	15	27	8	18	24	28	1.88	2.27	2.04	4.27	2.05	3.97
SK1G00040965	MergePeak_1538	quadrant5	no	5	1	2	0	0	2	5	1	2	2	1	2	2	0	1	2	0	0	1	2	3	0	1	0	2	3	7	1	1	0	0	1	3	0	1	3	1	0	0	0	1	0.22	0.47	0	0	0.44
SK1G00040966	MergePeak_1539	quadrant5	no	471	371	397	372	370	352	364	377	450	407	366	426	448	336	333	552	422	515	425	378	384	356	430	287	280	309	313	341	379	442	435	337	404	301	338	433	492	345	483	400	13.57	12	13.47	12.2	11.65	11.15
SK1G00040966	MergePeak_1540	quadrant5	no	471	371	397	372	370	352	364	377	450	407	366	426	448	336	333	552	422	515	425	378	384	356	430	287	280	309	313	341	379	442	435	337	404	301	338	433	492	345	483	400	13.57	12	13.47	12.2	11.65	11.15
SK1G00040967	MergePeak_1541	quadrant5	no	0	0	0	0	0	0	0	0	0	0	0	0	0	0	0	0	0	0	0	0	0	0	0	0	0	0	0	0	0	0	0	0	0	0	0	0	0	0	0	0	0	0	0	0	0	0
SK1G00040968	MergePeak_1542	quadrant5	no	958	907	825	868	1033	974	1238	1013	979	949	1035	1101	1108	895	882	1286	1102	1368	1123	1081	1114	1065	1384	1209	1157	1256	1296	1222	1572	1607	1404	1472	1659	1380	1659	1598	1520	1624	1716	1717	24.83	26.39	25.17	25.61	29.26	27.77
SK1G00040968	MergePeak_1543	quadrant5	no	958	907	825	868	1033	974	1238	1013	979	949	1035	1101	1108	895	882	1286	1102	1368	1123	1081	1114	1065	1384	1209	1157	1256	1296	1222	1572	1607	1404	1472	1659	1380	1659	1598	1520	1624	1716	1717	24.83	26.39	25.17	25.61	29.26	27.77
SK1G00040968	MergePeak_1544	quadrant5	no	958	907	825	868	1033	974	1238	1013	979	949	1035	1101	1108	895	882	1286	1102	1368	1123	1081	1114	1065	1384	1209	1157	1256	1296	1222	1572	1607	1404	1472	1659	1380	1659	1598	1520	1624	1716	1717	24.83	26.39	25.17	25.61	29.26	27.77
SK1G00040969	MergePeak_1545	quadrant5	no	1399	1075	1324	1046	1308	1162	1339	982	1003	894	841	836	877	770	694	1225	772	853	734	847	643	665	827	605	575	693	812	670	911	838	1024	944	996	778	1218	817	734	693	839	998	68.66	59.25	76.53	58.44	70.18	62.72
SK1G00040970	MergePeak_1546	quadrant5	no	153	150	120	145	172	138	163	82	129	107	106	129	139	131	122	149	149	147	132	162	115	150	162	138	132	96	105	125	148	139	136	136	131	94	143	145	130	160	173	171	8.32	9.16	7.68	8.97	10.22	8.25
SK1G00040973	MergePeak_1547	quadrant5	no	953	826	1018	921	982	868	1076	961	1215	1079	1031	1264	1368	1208	1067	1345	1238	1457	1325	1246	1304	1341	1893	1951	1949	2085	1922	1717	1726	1874	1854	1606	2076	1589	2120	2170	2061	2362	2272	2284	31.28	30.44	39.36	34.41	35.24	31.33
SK1G00040973	MergePeak_1548	quadrant5	no	953	826	1018	921	982	868	1076	961	1215	1079	1031	1264	1368	1208	1067	1345	1238	1457	1325	1246	1304	1341	1893	1951	1949	2085	1922	1717	1726	1874	1854	1606	2076	1589	2120	2170	2061	2362	2272	2284	31.28	30.44	39.36	34.41	35.24	31.33
SK1G00040973	MergePeak_1549	quadrant4	no	953	826	1018	921	982	868	1076	961	1215	1079	1031	1264	1368	1208	1067	1345	1238	1457	1325	1246	1304	1341	1893	1951	1949	2085	1922	1717	1726	1874	1854	1606	2076	1589	2120	2170	2061	2362	2272	2284	31.28	30.44	39.36	34.41	35.24	31.33
SK1G00040974	MergePeak_1550	quadrant5	no	6128	5358	5189	6199	6739	6371	7916	7202	6788	5917	6332	8707	7488	5399	6178	8653	7452	7967	7648	6935	6569	7168	5871	4777	4012	4282	4187	5180	5485	5112	5313	5023	5619	4949	4202	6392	5873	5182	5123	5478	275.72	270.7	274.98	317.47	331.45	315.26
SK1G00040974	MergePeak_1551	quadrant5	no	6128	5358	5189	6199	6739	6371	7916	7202	6788	5917	6332	8707	7488	5399	6178	8653	7452	7967	7648	6935	6569	7168	5871	4777	4012	4282	4187	5180	5485	5112	5313	5023	5619	4949	4202	6392	5873	5182	5123	5478	275.72	270.7	274.98	317.47	331.45	315.26
SK1G00040983	MergePeak_1552	quadrant5	no	65	116	106	157	97	94	176	147	201	122	258	202	203	161	180	327	191	204	321	194	344	171	188	195	194	213	250	310	135	193	290	175	196	96	238	211	185	186	82	209	2.54	5.08	4.87	6.97	4.14	4.03
SK1G00040983	MergePeak_1553	quadrant5	no	65	116	106	157	97	94	176	147	201	122	258	202	203	161	180	327	191	204	321	194	344	171	188	195	194	213	250	310	135	193	290	175	196	96	238	211	185	186	82	209	2.54	5.08	4.87	6.97	4.14	4.03
SK1G00040983	MergePeak_1554	quadrant5	no	65	116	106	157	97	94	176	147	201	122	258	202	203	161	180	327	191	204	321	194	344	171	188	195	194	213	250	310	135	193	290	175	196	96	238	211	185	186	82	209	2.54	5.08	4.87	6.97	4.14	4.03
SK1G00040986	MergePeak_1555	quadrant5	no	539	472	523	466	507	484	509	493	573	537	547	588	613	508	593	809	713	795	520	725	588	633	762	500	549	573	542	630	670	769	657	619	662	647	624	767	649	620	751	691	9.38	9.22	10.72	9.23	9.64	9.26
SK1G00040986	MergePeak_1556	quadrant5	no	539	472	523	466	507	484	509	493	573	537	547	588	613	508	593	809	713	795	520	725	588	633	762	500	549	573	542	630	670	769	657	619	662	647	624	767	649	620	751	691	9.38	9.22	10.72	9.23	9.64	9.26
SK1G00040986	MergePeak_1557	quadrant5	no	539	472	523	466	507	484	509	493	573	537	547	588	613	508	593	809	713	795	520	725	588	633	762	500	549	573	542	630	670	769	657	619	662	647	624	767	649	620	751	691	9.38	9.22	10.72	9.23	9.64	9.26
SK1G00040986	MergePeak_1558	quadrant5	no	539	472	523	466	507	484	509	493	573	537	547	588	613	508	593	809	713	795	520	725	588	633	762	500	549	573	542	630	670	769	657	619	662	647	624	767	649	620	751	691	9.38	9.22	10.72	9.23	9.64	9.26
SK1G00040988	MergePeak_1559	quadrant2	no	27	23	32	17	24	22	28	22	33	23	31	33	42	95	62	55	57	48	35	66	31	69	78	51	54	51	46	64	99	78	71	69	74	64	63	128	60	83	73	83	1.21	1.16	1.69	0.87	1.18	1.07
SK1G00040999	MergePeak_1560	quadrant2	no	340	265	283	310	289	337	326	254	327	362	369	370	538	405	382	495	577	659	587	564	677	657	863	1013	964	926	944	916	971	923	982	826	919	737	1156	983	940	1118	1161	1039	13.24	11.58	12.98	13.74	12.3	14.43
SK1G00040999	MergePeak_1561	quadrant2	no	340	265	283	310	289	337	326	254	327	362	369	370	538	405	382	495	577	659	587	564	677	657	863	1013	964	926	944	916	971	923	982	826	919	737	1156	983	940	1118	1161	1039	13.24	11.58	12.98	13.74	12.3	14.43
SK1G00040999	MergePeak_1562	quadrant2	no	340	265	283	310	289	337	326	254	327	362	369	370	538	405	382	495	577	659	587	564	677	657	863	1013	964	926	944	916	971	923	982	826	919	737	1156	983	940	1118	1161	1039	13.24	11.58	12.98	13.74	12.3	14.43
SK1G00041003	MergePeak_1563	quadrant8	no	3280	2989	2367	2190	2826	2386	3267	2026	1053	888	2076	1273	1684	664	1183	1669	1081	847	632	553	576	377	2182	468	531	1292	1245	690	602	580	713	707	820	308	626	541	600	853	1924	974	79.83	81.69	67.85	60.67	75.19	63.87
SK1G00041003	MergePeak_1564	quadrant8	no	3280	2989	2367	2190	2826	2386	3267	2026	1053	888	2076	1273	1684	664	1183	1669	1081	847	632	553	576	377	2182	468	531	1292	1245	690	602	580	713	707	820	308	626	541	600	853	1924	974	79.83	81.69	67.85	60.67	75.19	63.87
SK1G00041003	MergePeak_1565	quadrant8	no	3280	2989	2367	2190	2826	2386	3267	2026	1053	888	2076	1273	1684	664	1183	1669	1081	847	632	553	576	377	2182	468	531	1292	1245	690	602	580	713	707	820	308	626	541	600	853	1924	974	79.83	81.69	67.85	60.67	75.19	63.87
SK1G00041004	MergePeak_1566	quadrant5	no	215	221	300	279	385	343	598	453	284	269	366	335	227	176	290	288	258	224	216	209	260	160	296	178	279	432	446	153	112	149	276	247	174	169	225	149	254	157	387	262	10.63	12.27	17.47	15.7	20.8	18.65
SK1G00041004	MergePeak_1567	quadrant5	no	215	221	300	279	385	343	598	453	284	269	366	335	227	176	290	288	258	224	216	209	260	160	296	178	279	432	446	153	112	149	276	247	174	169	225	149	254	157	387	262	10.63	12.27	17.47	15.7	20.8	18.65
SK1G00041005	MergePeak_1568	quadrant5	no	384	333	343	379	462	444	684	531	377	340	479	526	456	299	439	488	382	368	318	303	390	300	343	259	222	495	495	230	244	247	409	298	331	222	329	292	346	305	396	326	20.19	19.66	21.24	22.68	26.55	25.67
SK1G00041005	MergePeak_1569	quadrant5	no	384	333	343	379	462	444	684	531	377	340	479	526	456	299	439	488	382	368	318	303	390	300	343	259	222	495	495	230	244	247	409	298	331	222	329	292	346	305	396	326	20.19	19.66	21.24	22.68	26.55	25.67
SK1G00041005	MergePeak_1570	quadrant5	no	384	333	343	379	462	444	684	531	377	340	479	526	456	299	439	488	382	368	318	303	390	300	343	259	222	495	495	230	244	247	409	298	331	222	329	292	346	305	396	326	20.19	19.66	21.24	22.68	26.55	25.67
SK1G00041005	MergePeak_1571	quadrant5	no	384	333	343	379	462	444	684	531	377	340	479	526	456	299	439	488	382	368	318	303	390	300	343	259	222	495	495	230	244	247	409	298	331	222	329	292	346	305	396	326	20.19	19.66	21.24	22.68	26.55	25.67
SK1G00041009	MergePeak_1572	quadrant5	no	334	277	319	330	383	313	400	312	332	377	277	410	389	286	277	396	367	368	354	331	321	325	358	304	314	323	341	331	376	390	347	344	408	328	355	418	409	411	439	411	7.87	7.33	8.85	8.85	9.86	8.11
SK1G00041009	MergePeak_1573	quadrant5	no	334	277	319	330	383	313	400	312	332	377	277	410	389	286	277	396	367	368	354	331	321	325	358	304	314	323	341	331	376	390	347	344	408	328	355	418	409	411	439	411	7.87	7.33	8.85	8.85	9.86	8.11
[truncated: 25,540 more rows]
[truncated: 45 more columns]
