# Supplementary material for: Multiomics analysis of the molecular and single-cell responses of rice after deep-space flight on Chang'e-5
Source: Research Square preprint supplement (doi:10.21203/rs.3.rs-7211908/v1), 2025-08-22
Supplement: Supplementary file 4 [file 3199e2ae5eaa5ec6611a61ff.xlsx]

## Sheet: Sheet1
Supplementary Data 9. Peaks detected by DAP-seq.
Peak_Name	Chr	Start	End	Length(bp)	Abs_Summit	Pileup	Fold_Enrichment	Annotation	Genechr	Genestart	Geneend	Genelength	Exonnumber	Genestrand	Geneid	Transcriptid	Disttotss	Symbol	Description	KEGG_A_class	KEGG_B_class	Pathway	K_ID	GO Component	GO Function	GO Process	TF_family
IP_peak_1	cluster1	2360	2818	459	2493	38	2.26383	Intron (SK1T00039297-RA/SK1G00039297, intron 5 of 9)	cluster1	1062	4258	3197	10	+	SK1G00039297	SK1T00039297-RA	1431	--	XP_015649195.1 protein phosphatase 1 regulatory subunit SDS22 isoform X2 [Oryza sativa Japonica Group]	-	-	-	-	-	GO:0005515//protein binding	-	-
IP_peak_2	cluster1	4175	4766	592	4373	38.5	2.06634	3' UTR	cluster1	1062	4258	3197	10	+	SK1G00039297	SK1T00039297-RA	3311	--	XP_015649195.1 protein phosphatase 1 regulatory subunit SDS22 isoform X2 [Oryza sativa Japonica Group]	-	-	-	-	-	GO:0005515//protein binding	-	-
IP_peak_3	cluster1	5643	6961	1319	6299	40	2.66707	Intron (SK1T00039298-RA/SK1G00039298, intron 6 of 12)	cluster1	4333	7974	3642	13	-	SK1G00039298	SK1T00039298-RA	1675	MPP	XP_025878283.1 mitochondrial-processing peptidase subunit alpha isoform X1 [Oryza sativa Japonica Group]	-	-	-	-	-	GO:0004222//metalloendopeptidase activity	GO:0018189//pyrroloquinoline quinone biosynthetic process	-
IP_peak_4	cluster1	10325	10753	429	10521	33	2.12967	3' UTR	cluster1	8174	8861	688	2	+	SK1G00039299	SK1T00039299-RA	2347	CCB3	XP_015649213.1 protein COFACTOR ASSEMBLY OF COMPLEX C SUBUNIT B CCB3, chloroplastic [Oryza sativa Japonica Group]	-	-	-	-	GO:0016020//membrane	-	-	-
IP_peak_5	cluster1	12869	13520	652	13393	41.5	2.62527	Exon (SK1T00039300-RA/SK1G00039300, exon 19 of 26)	cluster1	10405	22157	11753	26	-	SK1G00039300	SK1T00039300-RA	8764	ABCD1	XP_015649181.1 ABC transporter D family member 1 [Oryza sativa Japonica Group]	-	-	-	-	GO:0005575//cellular_component;GO:0005887//integral component of plasma membrane;GO:0009380//excinuclease repair complex;GO:0009898//cytoplasmic side of plasma membrane;GO:0015627//type II protein secretion system complex;GO:0016021//integral component of membrane;GO:0043190//ATP-binding cassette (ABC) transporter complex;GO:0055051//ATP-binding cassette (ABC) transporter complex, integrated subs…	GO:0000166//nucleotide binding;GO:0003677//DNA binding;GO:0003697//single-stranded DNA binding;GO:0003924//GTPase activity;GO:0004527//exonuclease activity;GO:0005260//channel-conductance-controlling ATPase activity;GO:0005319//lipid transporter activity;GO:0005524//ATP binding;GO:0005525//GTP binding;GO:0008134//transcription factor binding;GO:0008565//protein transporter activity;GO:0009381//ex…	GO:0000910//cytokinesis;GO:0006260//DNA replication;GO:0006281//DNA repair;GO:0006289//nucleotide-excision repair;GO:0006298//mismatch repair;GO:0006310//DNA recombination;GO:0006355//regulation of transcription, DNA-templated;GO:0006810//transport;GO:0006817//phosphate ion transport;GO:0006824//cobalt ion transport;GO:0006855//drug transmembrane transport;GO:0006869//lipid transport;GO:0007059//…	-
IP_peak_6	cluster1	13935	14541	607	14135	47	2.80375	Exon (SK1T00039300-RA/SK1G00039300, exon 16 of 26)	cluster1	10405	22157	11753	26	-	SK1G00039300	SK1T00039300-RA	8022	ABCD1	XP_015649181.1 ABC transporter D family member 1 [Oryza sativa Japonica Group]	-	-	-	-	GO:0005575//cellular_component;GO:0005887//integral component of plasma membrane;GO:0009380//excinuclease repair complex;GO:0009898//cytoplasmic side of plasma membrane;GO:0015627//type II protein secretion system complex;GO:0016021//integral component of membrane;GO:0043190//ATP-binding cassette (ABC) transporter complex;GO:0055051//ATP-binding cassette (ABC) transporter complex, integrated subs…	GO:0000166//nucleotide binding;GO:0003677//DNA binding;GO:0003697//single-stranded DNA binding;GO:0003924//GTPase activity;GO:0004527//exonuclease activity;GO:0005260//channel-conductance-controlling ATPase activity;GO:0005319//lipid transporter activity;GO:0005524//ATP binding;GO:0005525//GTP binding;GO:0008134//transcription factor binding;GO:0008565//protein transporter activity;GO:0009381//ex…	GO:0000910//cytokinesis;GO:0006260//DNA replication;GO:0006281//DNA repair;GO:0006289//nucleotide-excision repair;GO:0006298//mismatch repair;GO:0006310//DNA recombination;GO:0006355//regulation of transcription, DNA-templated;GO:0006810//transport;GO:0006817//phosphate ion transport;GO:0006824//cobalt ion transport;GO:0006855//drug transmembrane transport;GO:0006869//lipid transport;GO:0007059//…	-
IP_peak_7	cluster1	17832	18689	858	18368	40.5	2.4546	Intron (SK1T00039300-RA/SK1G00039300, intron 5 of 25)	cluster1	10405	22157	11753	26	-	SK1G00039300	SK1T00039300-RA	3789	ABCD1	XP_015649181.1 ABC transporter D family member 1 [Oryza sativa Japonica Group]	-	-	-	-	GO:0005575//cellular_component;GO:0005887//integral component of plasma membrane;GO:0009380//excinuclease repair complex;GO:0009898//cytoplasmic side of plasma membrane;GO:0015627//type II protein secretion system complex;GO:0016021//integral component of membrane;GO:0043190//ATP-binding cassette (ABC) transporter complex;GO:0055051//ATP-binding cassette (ABC) transporter complex, integrated subs…	GO:0000166//nucleotide binding;GO:0003677//DNA binding;GO:0003697//single-stranded DNA binding;GO:0003924//GTPase activity;GO:0004527//exonuclease activity;GO:0005260//channel-conductance-controlling ATPase activity;GO:0005319//lipid transporter activity;GO:0005524//ATP binding;GO:0005525//GTP binding;GO:0008134//transcription factor binding;GO:0008565//protein transporter activity;GO:0009381//ex…	GO:0000910//cytokinesis;GO:0006260//DNA replication;GO:0006281//DNA repair;GO:0006289//nucleotide-excision repair;GO:0006298//mismatch repair;GO:0006310//DNA recombination;GO:0006355//regulation of transcription, DNA-templated;GO:0006810//transport;GO:0006817//phosphate ion transport;GO:0006824//cobalt ion transport;GO:0006855//drug transmembrane transport;GO:0006869//lipid transport;GO:0007059//…	-
IP_peak_8	cluster1	22748	23145	398	22964	60	3.24145	Promoter (<=1kb)	cluster1	10405	22157	11753	26	-	SK1G00039300	SK1T00039300-RA	-807	ABCD1	XP_015649181.1 ABC transporter D family member 1 [Oryza sativa Japonica Group]	-	-	-	-	GO:0005575//cellular_component;GO:0005887//integral component of plasma membrane;GO:0009380//excinuclease repair complex;GO:0009898//cytoplasmic side of plasma membrane;GO:0015627//type II protein secretion system complex;GO:0016021//integral component of membrane;GO:0043190//ATP-binding cassette (ABC) transporter complex;GO:0055051//ATP-binding cassette (ABC) transporter complex, integrated subs…	GO:0000166//nucleotide binding;GO:0003677//DNA binding;GO:0003697//single-stranded DNA binding;GO:0003924//GTPase activity;GO:0004527//exonuclease activity;GO:0005260//channel-conductance-controlling ATPase activity;GO:0005319//lipid transporter activity;GO:0005524//ATP binding;GO:0005525//GTP binding;GO:0008134//transcription factor binding;GO:0008565//protein transporter activity;GO:0009381//ex…	GO:0000910//cytokinesis;GO:0006260//DNA replication;GO:0006281//DNA repair;GO:0006289//nucleotide-excision repair;GO:0006298//mismatch repair;GO:0006310//DNA recombination;GO:0006355//regulation of transcription, DNA-templated;GO:0006810//transport;GO:0006817//phosphate ion transport;GO:0006824//cobalt ion transport;GO:0006855//drug transmembrane transport;GO:0006869//lipid transport;GO:0007059//…	-
IP_peak_9	cluster1	34530	34836	307	34670	44.5	3.44237	Intron (SK1T00039302-RA/SK1G00039302, intron 3 of 4)	cluster1	32579	35145	2567	5	+	SK1G00039302	SK1T00039302-RA	2091	--	XP_015650212.1 uncharacterized protein LOC4324469 isoform X1 [Oryza sativa Japonica Group]	-	-	-	-	-	-	GO:0030638//polyketide metabolic process	-
IP_peak_10	cluster1	45280	46232	953	46072	52.5	3.02677	Exon (SK1T00039305-RA/SK1G00039305, exon 4 of 6)	cluster1	44914	47858	2945	6	+	SK1G00039305	SK1T00039305-RA	1158	--	XP_015623114.1 coiled-coil domain-containing protein R3HCC1L [Oryza sativa Japonica Group]	-	-	-	-	GO:0005634//nucleus;GO:0005737//cytoplasm	GO:0000340//RNA 7-methylguanosine cap binding;GO:0003676//nucleic acid binding;GO:0003723//RNA binding;GO:0003729//mRNA binding;GO:0004535//poly(A)-specific ribonuclease activity;GO:0046872//metal ion binding	GO:0006402//mRNA catabolic process	-
IP_peak_11	cluster1	52513	52832	320	52685	39.5	2.88709	Intron (SK1T00039306-RA/SK1G00039306, intron 9 of 12)	cluster1	50095	59885	9791	13	-	SK1G00039306	SK1T00039306-RA	7200	ATXR5	XP_015632396.1 probable Histone-lysine N-methyltransferase ATXR5 isoform X2 [Oryza sativa Japonica Group]	-	-	-	-	-	GO:0004072//aspartate kinase activity;GO:0004349//glutamate 5-kinase activity;GO:0005515//protein binding;GO:0017084//delta1-pyrroline-5-carboxylate synthetase activity;GO:0033862//UMP kinase activity	GO:0006561//proline biosynthetic process;GO:0009089//lysine biosynthetic process via diaminopimelate;GO:0015949//nucleobase-containing small molecule interconversion	-
IP_peak_12	cluster1	53295	54185	891	53922	40.5	2.56167	Intron (SK1T00039306-RA/SK1G00039306, intron 9 of 12)	cluster1	50095	59885	9791	13	-	SK1G00039306	SK1T00039306-RA	5963	ATXR5	XP_015632396.1 probable Histone-lysine N-methyltransferase ATXR5 isoform X2 [Oryza sativa Japonica Group]	-	-	-	-	-	GO:0004072//aspartate kinase activity;GO:0004349//glutamate 5-kinase activity;GO:0005515//protein binding;GO:0017084//delta1-pyrroline-5-carboxylate synthetase activity;GO:0033862//UMP kinase activity	GO:0006561//proline biosynthetic process;GO:0009089//lysine biosynthetic process via diaminopimelate;GO:0015949//nucleobase-containing small molecule interconversion	-
IP_peak_13	cluster1	55500	56357	858	55789	37.5	2.88652	Intron (SK1T00039306-RA/SK1G00039306, intron 7 of 12)	cluster1	50095	59885	9791	13	-	SK1G00039306	SK1T00039306-RA	4096	ATXR5	XP_015632396.1 probable Histone-lysine N-methyltransferase ATXR5 isoform X2 [Oryza sativa Japonica Group]	-	-	-	-	-	GO:0004072//aspartate kinase activity;GO:0004349//glutamate 5-kinase activity;GO:0005515//protein binding;GO:0017084//delta1-pyrroline-5-carboxylate synthetase activity;GO:0033862//UMP kinase activity	GO:0006561//proline biosynthetic process;GO:0009089//lysine biosynthetic process via diaminopimelate;GO:0015949//nucleobase-containing small molecule interconversion	-
IP_peak_14	cluster1	57608	58396	789	58125	41	3.41877	Exon (SK1T00039306-RA/SK1G00039306, exon 3 of 13)	cluster1	50095	59885	9791	13	-	SK1G00039306	SK1T00039306-RA	1760	ATXR5	XP_015632396.1 probable Histone-lysine N-methyltransferase ATXR5 isoform X2 [Oryza sativa Japonica Group]	-	-	-	-	-	GO:0004072//aspartate kinase activity;GO:0004349//glutamate 5-kinase activity;GO:0005515//protein binding;GO:0017084//delta1-pyrroline-5-carboxylate synthetase activity;GO:0033862//UMP kinase activity	GO:0006561//proline biosynthetic process;GO:0009089//lysine biosynthetic process via diaminopimelate;GO:0015949//nucleobase-containing small molecule interconversion	-
IP_peak_15	cluster1	78674	79483	810	79120	36	2.42669	Intron (SK1T00039310-RA/SK1G00039310, intron 2 of 5)	cluster1	74522	80238	5717	6	-	SK1G00039310	SK1T00039310-RA	1118	PRAF1	XP_015614405.1 PH, RCC1 and FYVE domains-containing protein 1 [Oryza sativa Japonica Group]	-	-	-	-	GO:0005737//cytoplasm;GO:0016021//integral component of membrane	GO:0003677//DNA binding;GO:0003700//transcription factor activity, sequence-specific DNA binding;GO:0004813//alanine-tRNA ligase activity;GO:0005524//ATP binding;GO:0016987//sigma factor activity;GO:0043565//sequence-specific DNA binding;GO:0046872//metal ion binding	GO:0006352//DNA-templated transcription, initiation;GO:0006355//regulation of transcription, DNA-templated;GO:0006419//alanyl-tRNA aminoacylation;GO:0006606//protein import into nucleus;GO:0007059//chromosome segregation;GO:0030261//chromosome condensation;GO:0070206//protein trimerization	-
IP_peak_17	cluster1	86612	87463	852	87184	33.5	2.22221	Promoter (<=1kb)	cluster1	88101	89960	1860	1	+	SK1G00039311	SK1T00039311-RA	-917	LECRK1	KAF2954455.1 hypothetical protein DAI22_01g483900 [Oryza sativa Japonica Group]	-	-	-	-	-	GO:0004672//protein kinase activity;GO:0005524//ATP binding	GO:0006468//protein phosphorylation;GO:0048544//recognition of pollen	-
IP_peak_20	cluster1	145057	145897	841	145201	45.5	3.25023	Downstream (1-2kb)	cluster1	147082	149008	1927	4	-	SK1G00039319	SK1T00039319-RA	3807	Os01g0963400	XP_015622279.1 thioredoxin Y, chloroplastic [Oryza sativa Japonica Group]	-	-	-	-	GO:0005737//cytoplasm	GO:0003756//protein disulfide isomerase activity;GO:0015036//disulfide oxidoreductase activity;GO:0016209//antioxidant activity;GO:0016491//oxidoreductase activity;GO:0016667//oxidoreductase activity, acting on a sulfur group of donors	GO:0006457//protein folding;GO:0006790//sulfur compound metabolic process;GO:0055114//oxidation-reduction process	-
IP_peak_21	cluster1	149447	150097	651	149581	44.5	2.54451	Intron (SK1T00039320-RA/SK1G00039320, intron 1 of 6)	cluster1	149360	152108	2749	7	+	SK1G00039320	SK1T00039320-RA	221	SYP61	XP_015625156.1 syntaxin-61 [Oryza sativa Japonica Group]	Genetic Information Processing	Folding, sorting and degradation	ko04130//SNARE interactions in vesicular transport	K08500	GO:0016020//membrane	-	GO:0048193//Golgi vesicle transport	-
IP_peak_22	cluster1	151584	152011	428	151877	35	1.97454	Intron (SK1T00039320-RA/SK1G00039320, intron 6 of 6)	cluster1	149360	152108	2749	7	+	SK1G00039320	SK1T00039320-RA	2517	SYP61	XP_015625156.1 syntaxin-61 [Oryza sativa Japonica Group]	Genetic Information Processing	Folding, sorting and degradation	ko04130//SNARE interactions in vesicular transport	K08500	GO:0016020//membrane	-	GO:0048193//Golgi vesicle transport	-
IP_peak_23	cluster1	179980	180278	299	180170	33.5	2.15259	Intron (SK1T00039323-RA/SK1G00039323, intron 3 of 4)	cluster1	179027	181228	2202	5	+	SK1G00039323	SK1T00039323-RA	1143	RPS10-1	XP_006645354.1 PREDICTED: 40S ribosomal protein S10-like [Oryza brachyantha]	Genetic Information Processing	Translation	ko03010//Ribosome	K02947	-	-	-	-
IP_peak_24	cluster1	183320	184024	705	183812	46.5	3.03475	Promoter (1-2kb)	cluster1	185142	186831	1690	4	+	SK1G00039325	SK1T00039325-RA	-1330	Os01g0962400	XP_015622173.1 ubiquitin-fold modifier 1 [Oryza sativa Japonica Group]	-	-	-	-	-	-	GO:0071569//protein ufmylation	-
IP_peak_25	cluster1	186742	187213	472	186902	48	2.80082	Downstream (<1kb)	cluster1	187641	188564	924	2	-	SK1G00039326	SK1T00039326-RA	1662	VATP-P1	XP_025878279.1 V-type proton ATPase 16 kDa proteolipid subunit [Oryza sativa Japonica Group]	Metabolism;Metabolism;Cellular Processes	Global and overview maps;Energy metabolism;Transport and catabolism	ko01100//Metabolic pathways;ko00190//Oxidative phosphorylation;ko04145//Phagosome	K02155;K02155;K02155	GO:0016471//vacuolar proton-transporting V-type ATPase complex;GO:0033177//proton-transporting two-sector ATPase complex, proton-transporting domain	GO:0008553//hydrogen-exporting ATPase activity, phosphorylative mechanism;GO:0015078//hydrogen ion transmembrane transporter activity	GO:0015991//ATP hydrolysis coupled proton transport;GO:1902600//hydrogen ion transmembrane transport	-
IP_peak_26	cluster1	191817	193084	1268	192206	44	2.91755	Intron (SK1T00039327-RA/SK1G00039327, intron 6 of 6)	cluster1	189810	192911	3102	7	+	SK1G00039327	SK1T00039327-RA	2396	--	BAD87231.1 membrane protein-like [Oryza sativa Japonica Group]	-	-	-	-	GO:0016021//integral component of membrane	GO:0016811//hydrolase activity, acting on carbon-nitrogen (but not peptide) bonds, in linear amides	GO:0006672//ceramide metabolic process	-
IP_peak_27	cluster1	205588	206357	770	205796	45.5	3.04113	Exon (SK1T00039330-RA/SK1G00039330, exon 2 of 11)	cluster1	205131	213056	7926	11	+	SK1G00039330	SK1T00039330-RA	665	--	XP_015616217.1 uncharacterized protein LOC4324546 isoform X3 [Oryza sativa Japonica Group]	-	-	-	-	-	GO:0004867//serine-type endopeptidase inhibitor activity	-	-
IP_peak_28	cluster1	206886	207609	724	207055	40	2.85493	Intron (SK1T00039330-RA/SK1G00039330, intron 3 of 10)	cluster1	205131	213056	7926	11	+	SK1G00039330	SK1T00039330-RA	1924	--	XP_015616217.1 uncharacterized protein LOC4324546 isoform X3 [Oryza sativa Japonica Group]	-	-	-	-	-	GO:0004867//serine-type endopeptidase inhibitor activity	-	-
IP_peak_29	cluster1	209557	210848	1292	210665	44	3.14946	Intron (SK1T00039330-RA/SK1G00039330, intron 10 of 10)	cluster1	205131	213056	7926	11	+	SK1G00039330	SK1T00039330-RA	5534	--	XP_015616217.1 uncharacterized protein LOC4324546 isoform X3 [Oryza sativa Japonica Group]	-	-	-	-	-	GO:0004867//serine-type endopeptidase inhibitor activity	-	-
IP_peak_30	cluster1	226152	228068	1917	226873	38	2.19129	Exon (SK1T00039333-RA/SK1G00039333, exon 8 of 14)	cluster1	224790	229416	4627	14	-	SK1G00039333	SK1T00039333-RA	2543	CBSCBSPB3	XP_015622509.1 CBS domain-containing protein CBSCBSPB3 isoform X1 [Oryza sativa Japonica Group]	-	-	-	-	-	GO:0003938//IMP dehydrogenase activity;GO:0005515//protein binding;GO:0016853//isomerase activity	GO:0005975//carbohydrate metabolic process;GO:0009152//purine ribonucleotide biosynthetic process	-
IP_peak_32	cluster1	236689	237090	402	236818	34.5	2.27346	Promoter (<=1kb)	cluster1	236160	236417	258	1	-	SK1G00039334	SK1T00039334-RA	-401	--	BAD87131.1 unknown protein [Oryza sativa Japonica Group]	-	-	-	-	-	-	-	-
IP_peak_33	cluster1	247508	248405	898	247851	42.5	2.53635	Exon (SK1T00039336-RA/SK1G00039336, exon 10 of 11)	cluster1	245825	248038	2214	11	+	SK1G00039336	SK1T00039336-RA	2026	--	XP_015642595.1 uncharacterized protein LOC9271196 isoform X1 [Oryza sativa Japonica Group]	-	-	-	-	-	-	-	-
IP_peak_34	cluster1	250387	252710	2324	251239	44.75	2.49878	Intron (SK1T00039337-RA/SK1G00039337, intron 2 of 11)	cluster1	250062	254418	4357	12	+	SK1G00039337	SK1T00039337-RA	1177	RGLG3	EEE56046.1 hypothetical protein OsJ_04843 [Oryza sativa Japonica Group]	-	-	-	-	-	GO:0046872//metal ion binding	-	-
IP_peak_40	cluster1	272460	273445	986	272979	46	2.99126	Intron (SK1T00039338-RA/SK1G00039338, intron 7 of 12)	cluster1	269617	276069	6453	13	+	SK1G00039338	SK1T00039338-RA	3362	mnmG	XP_015649137.1 uncharacterized protein LOC4325242 isoform X1 [Oryza sativa Japonica Group]	-	-	-	-	GO:0005737//cytoplasm;GO:0009331//glycerol-3-phosphate dehydrogenase complex	GO:0000104//succinate dehydrogenase activity;GO:0000286//alanine dehydrogenase activity;GO:0004148//dihydrolipoyl dehydrogenase activity;GO:0004362//glutathione-disulfide reductase activity;GO:0004368//glycerol-3-phosphate dehydrogenase activity;GO:0004791//thioredoxin-disulfide reductase activity;GO:0016491//oxidoreductase activity;GO:0016668//oxidoreductase activity, acting on a sulfur group of…	GO:0006071//glycerol metabolic process;GO:0006096//glycolytic process;GO:0006099//tricarboxylic acid cycle;GO:0006400//tRNA modification;GO:0006522//alanine metabolic process;GO:0006805//xenobiotic metabolic process;GO:0009060//aerobic respiration;GO:0009061//anaerobic respiration;GO:0009236//cobalamin biosynthetic process;GO:0009398//FMN biosynthetic process;GO:0015995//chlorophyll biosynthetic …	-
IP_peak_41	cluster1	275742	276672	931	276438	37.5	2.48271	Downstream (<1kb)	cluster1	276733	279561	2829	4	-	SK1G00039339	SK1T00039339-RA	3123	NRG2	XP_015649124.1 nitrate regulatory gene2 protein [Oryza sativa Japonica Group]	-	-	-	-	-	-	-	-
IP_peak_42	cluster1	288085	288516	432	288204	42.5	1.87817	Intron (SK1T00039341-RA/SK1G00039341, intron 1 of 1)	cluster1	287995	290089	2095	2	-	SK1G00039341	SK1T00039341-RA	1885	At5g09310	XP_015649116.1 probable gamma-secretase subunit PEN-2 [Oryza sativa Japonica Group]	-	-	-	-	-	-	-	-
IP_peak_43	cluster1	296570	297678	1109	297271	42	2.70197	Intron (SK1T00039343-RA/SK1G00039343, intron 11 of 20)	cluster1	294151	301886	7736	21	+	SK1G00039343	SK1T00039343-RA	3120	PSD2	XP_015622516.1 phosphatidylserine decarboxylase proenzyme 2 [Oryza sativa Japonica Group]	Metabolism;Metabolism;Metabolism	Global and overview maps;Global and overview maps;Lipid metabolism	ko01100//Metabolic pathways;ko01110//Biosynthesis of secondary metabolites;ko00564//Glycerophospholipid metabolism	K01613;K01613;K01613	-	GO:0004609//phosphatidylserine decarboxylase activity;GO:0005509//calcium ion binding	GO:0008654//phospholipid biosynthetic process	-
IP_peak_44	cluster1	302762	303221	460	303114	41	2.33996	Downstream (<1kb)	cluster1	303238	303474	237	2	-	SK1G00039344	SK1T00039344-RA	360	--	-	-	-	-	-	GO:0005680//anaphase-promoting complex	-	-	-
IP_peak_45	cluster1	310773	311198	426	310903	27	2.52393	Promoter (<=1kb)	cluster1	309749	310887	1139	2	-	SK1G00039346	SK1T00039346-RA	-16	--	BAB89007.1 hypothetical protein [Oryza sativa Japonica Group]	-	-	-	-	-	-	-	-
IP_peak_46	cluster1	322947	323408	462	323271	35	1.9938	Promoter (<=1kb)	cluster1	323545	323966	422	2	+	SK1G00039348	SK1T00039348-RA	-274	ASR3	XP_015650008.1 abscisic stress-ripening protein 3 [Oryza sativa Japonica Group]	-	-	-	-	-	-	-	-
IP_peak_47	cluster1	327575	328531	957	328152	40.5	2.54465	Exon (SK1T00039349-RA/SK1G00039349, exon 3 of 10)	cluster1	324845	329850	5006	10	-	SK1G00039349	SK1T00039349-RA	1698	SR45	XP_010232840.1 serine/arginine-rich splicing factor SR45 isoform X1 [Brachypodium distachyon]	Genetic Information Processing;Genetic Information Processing	Translation;Translation	ko03013//RNA transport;ko03015//mRNA surveillance pathway	K14325;K14325	-	GO:0003676//nucleic acid binding	GO:0008380//RNA splicing	-
IP_peak_48	cluster1	328808	329208	401	328858	33.5	1.71738	Intron (SK1T00039349-RA/SK1G00039349, intron 1 of 9)	cluster1	324845	329850	5006	10	-	SK1G00039349	SK1T00039349-RA	992	SR45	XP_010232840.1 serine/arginine-rich splicing factor SR45 isoform X1 [Brachypodium distachyon]	Genetic Information Processing;Genetic Information Processing	Translation;Translation	ko03013//RNA transport;ko03015//mRNA surveillance pathway	K14325;K14325	-	GO:0003676//nucleic acid binding	GO:0008380//RNA splicing	-
IP_peak_49	cluster1	332626	333068	443	332864	36.5	2.25604	Intron (SK1T00039350-RA/SK1G00039350, intron 11 of 15)	cluster1	330630	336492	5863	16	-	SK1G00039350	SK1T00039350-RA	3628	MLH1	XP_015649867.1 DNA mismatch repair protein MLH1 isoform X1 [Oryza sativa Japonica Group]	Genetic Information Processing	Replication and repair	ko03430//Mismatch repair	K08734	GO:0009330//DNA topoisomerase complex (ATP-hydrolyzing)	GO:0000155//phosphorelay sensor kinase activity;GO:0003918//DNA topoisomerase type II (ATP-hydrolyzing) activity;GO:0005524//ATP binding;GO:0016887//ATPase activity;GO:0030983//mismatched DNA binding	GO:0000160//phosphorelay signal transduction system;GO:0006265//DNA topological change;GO:0006298//mismatch repair;GO:0006796//phosphate-containing compound metabolic process;GO:0006817//phosphate ion transport	-
IP_peak_50	cluster1	334132	334432	301	334325	45	2.9119	Intron (SK1T00039350-RA/SK1G00039350, intron 7 of 15)	cluster1	330630	336492	5863	16	-	SK1G00039350	SK1T00039350-RA	2167	MLH1	XP_015649867.1 DNA mismatch repair protein MLH1 isoform X1 [Oryza sativa Japonica Group]	Genetic Information Processing	Replication and repair	ko03430//Mismatch repair	K08734	GO:0009330//DNA topoisomerase complex (ATP-hydrolyzing)	GO:0000155//phosphorelay sensor kinase activity;GO:0003918//DNA topoisomerase type II (ATP-hydrolyzing) activity;GO:0005524//ATP binding;GO:0016887//ATPase activity;GO:0030983//mismatched DNA binding	GO:0000160//phosphorelay signal transduction system;GO:0006265//DNA topological change;GO:0006298//mismatch repair;GO:0006796//phosphate-containing compound metabolic process;GO:0006817//phosphate ion transport	-
IP_peak_51	cluster1	334785	335102	318	334913	44	2.96587	Intron (SK1T00039350-RA/SK1G00039350, intron 5 of 15)	cluster1	330630	336492	5863	16	-	SK1G00039350	SK1T00039350-RA	1579	MLH1	XP_015649867.1 DNA mismatch repair protein MLH1 isoform X1 [Oryza sativa Japonica Group]	Genetic Information Processing	Replication and repair	ko03430//Mismatch repair	K08734	GO:0009330//DNA topoisomerase complex (ATP-hydrolyzing)	GO:0000155//phosphorelay sensor kinase activity;GO:0003918//DNA topoisomerase type II (ATP-hydrolyzing) activity;GO:0005524//ATP binding;GO:0016887//ATPase activity;GO:0030983//mismatched DNA binding	GO:0000160//phosphorelay signal transduction system;GO:0006265//DNA topological change;GO:0006298//mismatch repair;GO:0006796//phosphate-containing compound metabolic process;GO:0006817//phosphate ion transport	-
IP_peak_52	cluster1	344411	344812	402	344679	43.5	2.22768	5' UTR	cluster1	340473	345106	4634	7	-	SK1G00039352	SK1T00039352-RA	427	At4g24290	XP_015649889.1 MACPF domain-containing protein At4g24290 [Oryza sativa Japonica Group]	-	-	-	-	-	-	-	-
IP_peak_53	cluster1	351966	352294	329	352147	82	4.9688	Intron (SK1T00039353-RA/SK1G00039353, intron 5 of 5)	cluster1	350084	357558	7475	6	-	SK1G00039353	SK1T00039353-RA	5411	ARP1	XP_015622089.1 RNA-binding protein 24 isoform X1 [Oryza sativa Japonica Group]	-	-	-	-	-	GO:0003676//nucleic acid binding;GO:0008756//o-succinylbenzoate-CoA ligase activity	GO:0008380//RNA splicing;GO:0009234//menaquinone biosynthetic process	-
IP_peak_54	cluster1	361639	362333	695	361955	41.5	2.59486	Intron (SK1T00039354-RA/SK1G00039354, intron 3 of 4)	cluster1	361327	366553	5227	5	-	SK1G00039354	SK1T00039354-RA	4598	CFM9	BAD87108.1 protein kinase-like [Oryza sativa Japonica Group]	-	-	-	-	GO:0005737//cytoplasm	GO:0003723//RNA binding	GO:0008150//biological_process;GO:0048544//recognition of pollen	-
IP_peak_55	cluster1	363698	364180	483	363979	39	2.29866	Intron (SK1T00039354-RA/SK1G00039354, intron 1 of 4)	cluster1	361327	366553	5227	5	-	SK1G00039354	SK1T00039354-RA	2574	CFM9	BAD87108.1 protein kinase-like [Oryza sativa Japonica Group]	-	-	-	-	GO:0005737//cytoplasm	GO:0003723//RNA binding	GO:0008150//biological_process;GO:0048544//recognition of pollen	-
IP_peak_56	cluster1	372117	372952	836	372663	33.5	2.041	Downstream (<1kb)	cluster1	372748	375894	3147	12	-	SK1G00039356	SK1T00039356-RA	3231	CDKC-2	KAF0893654.1 hypothetical protein E2562_028061 [Oryza meyeriana var. granulata] [Oryza meyeriana]	-	-	-	-	-	GO:0004672//protein kinase activity;GO:0005524//ATP binding	GO:0006468//protein phosphorylation	-
IP_peak_57	cluster1	381146	382518	1373	382053	46.6666666666667	2.93375666666667	Intron (SK1T00039357-RA/SK1G00039357, intron 10 of 16)	cluster1	377344	388436	11093	17	-	SK1G00039357	SK1T00039357-RA	6383	RRP12	EEC72195.1 hypothetical protein OsI_05273 [Oryza sativa Indica Group]	-	-	-	-	-	-	-	-
IP_peak_58	cluster1	384323	385619	1297	385004	40.5	2.35932	Intron (SK1T00039357-RA/SK1G00039357, intron 4 of 16)	cluster1	377344	388436	11093	17	-	SK1G00039357	SK1T00039357-RA	3432	RRP12	EEC72195.1 hypothetical protein OsI_05273 [Oryza sativa Indica Group]	-	-	-	-	-	-	-	-
IP_peak_59	cluster1	389477	389938	462	389540	36.5	2.24922	Promoter (1-2kb)	cluster1	377344	388436	11093	18	-	SK1G00039357	SK1T00039357-RB	-1104	RRP12	EEC72195.1 hypothetical protein OsI_05273 [Oryza sativa Indica Group]	-	-	-	-	-	-	-	-
IP_peak_60	cluster1	393984	394822	839	394145	63.5	3.74392	Intron (SK1T00039358-RA/SK1G00039358, intron 7 of 10)	cluster1	389657	403045	13389	11	-	SK1G00039358	SK1T00039358-RA	8900	CYP71Z18	XP_015625431.2 premnaspirodiene oxygenase [Oryza sativa Japonica Group]	-	-	-	-	-	GO:0005506//iron ion binding;GO:0016705//oxidoreductase activity, acting on paired donors, with incorporation or reduction of molecular oxygen;GO:0020037//heme binding	GO:0055114//oxidation-reduction process	-
IP_peak_61	cluster1	423304	423913	610	423415	37.5	2.51636	Promoter (1-2kb)	cluster1	417797	421432	3636	2	-	SK1G00039361	SK1T00039361-RA	-1983	At3g28040	EAY77289.1 hypothetical protein OsI_05265 [Oryza sativa Indica Group]	-	-	-	-	-	GO:0004672//protein kinase activity;GO:0005515//protein binding;GO:0005524//ATP binding	GO:0006468//protein phosphorylation	-
IP_peak_62	cluster1	435372	435865	494	435706	51	2.96341	Exon (SK1T00039363-RA/SK1G00039363, exon 1 of 2)	cluster1	432876	435761	2886	2	-	SK1G00039363	SK1T00039363-RA	55	RPS5	XP_025881773.1 disease resistance protein SUMM2 [Oryza sativa Japonica Group]	Organismal Systems	Environmental adaptation	ko04626//Plant-pathogen interaction	K13459	-	GO:0003924//GTPase activity;GO:0005515//protein binding;GO:0005524//ATP binding;GO:0005525//GTP binding;GO:0016772//transferase activity, transferring phosphorus-containing groups;GO:0043531//ADP binding	GO:0015809//arginine transport;GO:0015819//lysine transport;GO:0015822//ornithine transport	-
IP_peak_63	cluster1	439222	439932	711	439605	41.5	2.28155	Intron (SK1T00039364-RA/SK1G00039364, intron 2 of 9)	cluster1	438818	442318	3501	10	+	SK1G00039364	SK1T00039364-RA	787	--	EAZ14884.1 hypothetical protein OsJ_04815 [Oryza sativa Japonica Group]	-	-	-	-	-	GO:0004540//ribonuclease activity	GO:0006397//mRNA processing	-
IP_peak_64	cluster1	441039	441582	544	441286	34	2.13346	Intron (SK1T00039364-RA/SK1G00039364, intron 8 of 9)	cluster1	438818	442318	3501	10	+	SK1G00039364	SK1T00039364-RA	2468	--	EAZ14884.1 hypothetical protein OsJ_04815 [Oryza sativa Japonica Group]	-	-	-	-	-	GO:0004540//ribonuclease activity	GO:0006397//mRNA processing	-
IP_peak_65	cluster1	449468	449838	371	449703	37.5	2.14483	Exon (SK1T00039365-RA/SK1G00039365, exon 6 of 11)	cluster1	448550	452240	3691	11	-	SK1G00039365	SK1T00039365-RA	2537	U2AF2	EEE56030.1 hypothetical protein OsJ_04814 [Oryza sativa Japonica Group]	Genetic Information Processing	Transcription	ko03040//Spliceosome	K12837	-	GO:0003676//nucleic acid binding	GO:0008380//RNA splicing	-
IP_peak_66	cluster1	451984	452673	690	452239	39	2.45484	Exon (SK1T00039365-RA/SK1G00039365, exon 1 of 11)	cluster1	448550	452240	3691	11	-	SK1G00039365	SK1T00039365-RA	1	U2AF2	EEE56030.1 hypothetical protein OsJ_04814 [Oryza sativa Japonica Group]	Genetic Information Processing	Transcription	ko03040//Spliceosome	K12837	-	GO:0003676//nucleic acid binding	GO:0008380//RNA splicing	-
IP_peak_67	cluster1	460846	461564	719	461108	36	2.30337	Promoter (1-2kb)	cluster1	459912	460061	150	1	-	SK1G00039366	SK1T00039366-RA	-1047	--	BAF04210.1 Os01g0196800 [Oryza sativa Japonica Group]	-	-	-	-	-	-	-	-
IP_peak_70	cluster1	478807	479135	329	478958	38.5	2.39279	Promoter (<=1kb)	cluster1	479790	480779	990	1	+	SK1G00039370	SK1T00039370-RA	-832	--	XP_015632524.1 U-box domain-containing protein 14 [Oryza sativa Japonica Group]	-	-	-	-	-	GO:0005515//protein binding	-	-
IP_peak_71	cluster1	488455	488844	390	488587	33.5	2.43939	Promoter (<=1kb)	cluster1	487613	487738	126	1	-	SK1G00039371	SK1T00039371-RA	-849	--	EAY86160.1 hypothetical protein OsI_07540 [Oryza sativa Indica Group]	-	-	-	-	-	-	-	-
IP_peak_73	cluster1	505838	506475	638	506393	36	1.71053	Intron (SK1T00039372-RA/SK1G00039372, intron 9 of 9)	cluster1	504726	512846	8121	10	-	SK1G00039372	SK1T00039372-RA	6453	CLT1	KAF2954367.1 hypothetical protein DAI22_01g476700 [Oryza sativa Japonica Group]	-	-	-	-	GO:0016021//integral component of membrane	GO:0022857//transmembrane transporter activity	GO:0055085//transmembrane transport	-
IP_peak_74	cluster1	508178	509004	827	508445	48	2.93806	Intron (SK1T00039372-RA/SK1G00039372, intron 7 of 9)	cluster1	504726	512846	8121	10	-	SK1G00039372	SK1T00039372-RA	4401	CLT1	KAF2954367.1 hypothetical protein DAI22_01g476700 [Oryza sativa Japonica Group]	-	-	-	-	GO:0016021//integral component of membrane	GO:0022857//transmembrane transporter activity	GO:0055085//transmembrane transport	-
IP_peak_75	cluster1	509267	510169	903	509485	47.5	2.76877	Intron (SK1T00039372-RA/SK1G00039372, intron 4 of 9)	cluster1	504726	512846	8121	10	-	SK1G00039372	SK1T00039372-RA	3361	CLT1	KAF2954367.1 hypothetical protein DAI22_01g476700 [Oryza sativa Japonica Group]	-	-	-	-	GO:0016021//integral component of membrane	GO:0022857//transmembrane transporter activity	GO:0055085//transmembrane transport	-
IP_peak_76	cluster1	514877	515330	454	514960	36	2.08414	Intron (SK1T00039373-RA/SK1G00039373, intron 3 of 4)	cluster1	514426	518047	3622	5	-	SK1G00039373	SK1T00039373-RA	3087	--	BAD88269.1 hypothetical protein [Oryza sativa Japonica Group]	-	-	-	-	-	-	-	-
IP_peak_77	cluster1	516455	517094	640	516930	41.5	2.25384	Intron (SK1T00039373-RA/SK1G00039373, intron 2 of 4)	cluster1	514426	518047	3622	5	-	SK1G00039373	SK1T00039373-RA	1117	--	BAD88269.1 hypothetical protein [Oryza sativa Japonica Group]	-	-	-	-	-	-	-	-
IP_peak_78	cluster1	532330	532744	415	532498	120.5	7.83104	Intron (SK1T00039377-RA/SK1G00039377, intron 1 of 3)	cluster1	531723	536243	4521	4	+	SK1G00039377	SK1T00039377-RA	775	NPC2	EAY77273.1 hypothetical protein OsI_05247 [Oryza sativa Indica Group]	Metabolism;Metabolism;Metabolism;Metabolism;Metabolism	Global and overview maps;Global and overview maps;Lipid metabolism;Carbohydrate metabolism;Lipid metabolism	ko01100//Metabolic pathways;ko01110//Biosynthesis of secondary metabolites;ko00564//Glycerophospholipid metabolism;ko00562//Inositol phosphate metabolism;ko00565//Ether lipid metabolism	K01114;K01114;K01114;K01114;K01114	-	GO:0004629//phospholipase C activity;GO:0016788//hydrolase activity, acting on ester bonds	-	-
IP_peak_79	cluster1	533894	534198	305	534041	42	2.57993	Intron (SK1T00039377-RA/SK1G00039377, intron 1 of 3)	cluster1	531723	536243	4521	4	+	SK1G00039377	SK1T00039377-RA	2318	NPC2	EAY77273.1 hypothetical protein OsI_05247 [Oryza sativa Indica Group]	Metabolism;Metabolism;Metabolism;Metabolism;Metabolism	Global and overview maps;Global and overview maps;Lipid metabolism;Carbohydrate metabolism;Lipid metabolism	ko01100//Metabolic pathways;ko01110//Biosynthesis of secondary metabolites;ko00564//Glycerophospholipid metabolism;ko00562//Inositol phosphate metabolism;ko00565//Ether lipid metabolism	K01114;K01114;K01114;K01114;K01114	-	GO:0004629//phospholipase C activity;GO:0016788//hydrolase activity, acting on ester bonds	-	-
IP_peak_83	cluster1	584338	584713	376	584526	36	2.14633	Downstream (2-3kb)	cluster1	586891	589114	2224	4	-	SK1G00039380	SK1T00039380-RA	4588	--	EEE56020.1 hypothetical protein OsJ_04797 [Oryza sativa Japonica Group]	-	-	-	-	GO:0005680//anaphase-promoting complex	GO:0008270//zinc ion binding;GO:0046872//metal ion binding;GO:0061630//ubiquitin protein ligase activity;GO:0097602//cullin family protein binding	GO:0031145//anaphase-promoting complex-dependent proteasomal ubiquitin-dependent protein catabolic process	-
IP_peak_84	cluster1	588067	588559	493	588281	34	2.20207	Intron (SK1T00039380-RA/SK1G00039380, intron 2 of 3)	cluster1	586891	589114	2224	4	-	SK1G00039380	SK1T00039380-RA	833	--	EEE56020.1 hypothetical protein OsJ_04797 [Oryza sativa Japonica Group]	-	-	-	-	GO:0005680//anaphase-promoting complex	GO:0008270//zinc ion binding;GO:0046872//metal ion binding;GO:0061630//ubiquitin protein ligase activity;GO:0097602//cullin family protein binding	GO:0031145//anaphase-promoting complex-dependent proteasomal ubiquitin-dependent protein catabolic process	-
IP_peak_85	cluster1	592184	592697	514	592361	39	2.59137	Promoter (1-2kb)	cluster1	593482	593742	261	1	+	SK1G00039381	SK1T00039381-RA	-1121	--	-	-	-	-	-	-	-	-	-
IP_peak_86	cluster1	593890	594564	675	594022	39	2.37668	Downstream (1-2kb)	cluster1	593482	593742	261	1	+	SK1G00039381	SK1T00039381-RA	540	--	-	-	-	-	-	-	-	-	-
IP_peak_88	cluster1	611752	612828	1077	612569	40.5	2.63971	Promoter (1-2kb)	cluster1	613773	614969	1197	1	+	SK1G00039385	SK1T00039385-RA	-1204	--	XP_015614523.1 uncharacterized protein LOC4325399 [Oryza sativa Japonica Group]	-	-	-	-	GO:0005737//cytoplasm	GO:0016987//sigma factor activity	GO:0006352//DNA-templated transcription, initiation;GO:0006979//response to oxidative stress	-
IP_peak_89	cluster1	619795	620125	331	619981	45	2.48956	Promoter (1-2kb)	cluster1	616281	618422	2142	1	-	SK1G00039386	SK1T00039386-RA	-1559	--	EEE56017.1 hypothetical protein OsJ_04788 [Oryza sativa Japonica Group]	-	-	-	-	-	-	-	-
IP_peak_90	cluster1	623802	624401	600	624209	39	2.88853	Intron (SK1T00039387-RA/SK1G00039387, intron 2 of 7)	cluster1	622208	628043	5836	8	+	SK1G00039387	SK1T00039387-RA	2001	IRO2	XP_015612709.1 protein IRON-RELATED TRANSCRIPTION FACTOR 2 isoform X1 [Oryza sativa Japonica Group]	Metabolism;Metabolism;Metabolism	Global and overview maps;Global and overview maps;Carbohydrate metabolism	ko01100//Metabolic pathways;ko01110//Biosynthesis of secondary metabolites;ko00500//Starch and sucrose metabolism	K16055;K16055;K16055	-	GO:0003824//catalytic activity;GO:0004805//trehalose-phosphatase activity;GO:0016787//hydrolase activity;GO:0046983//protein dimerization activity	GO:0005992//trehalose biosynthetic process;GO:0008152//metabolic process	bHLH
IP_peak_91	cluster1	630786	631479	694	631084	29.5	2.54671	Intron (SK1T00039388-RA/SK1G00039388, intron 1 of 5)	cluster1	629183	632219	3037	6	-	SK1G00039388	SK1T00039388-RA	1135	--	EEC75573.1 hypothetical protein OsI_12258 [Oryza sativa Indica Group]	-	-	-	-	-	GO:0042586//peptide deformylase activity	-	-
IP_peak_92	cluster1	656704	657431	728	657027	42.5	2.83725	Intron (SK1T00039393-RA/SK1G00039393, intron 12 of 17)	cluster1	653892	662127	8236	18	-	SK1G00039393	SK1T00039393-RA	5100	lacZ	KAB8085246.1 hypothetical protein EE612_008019 [Oryza sativa]	Metabolism;Metabolism;Metabolism;Metabolism	Global and overview maps;Carbohydrate metabolism;Lipid metabolism;Glycan biosynthesis and metabolism	ko01100//Metabolic pathways;ko00052//Galactose metabolism;ko00600//Sphingolipid metabolism;ko00511//Other glycan degradation	K01190;K01190;K01190;K01190	GO:0009341//beta-galactosidase complex	GO:0004553//hydrolase activity, hydrolyzing O-glycosyl compounds;GO:0004565//beta-galactosidase activity	GO:0005975//carbohydrate metabolic process	-
IP_peak_93	cluster1	657772	658174	403	657904	47.5	2.6429	Intron (SK1T00039393-RA/SK1G00039393, intron 9 of 17)	cluster1	653892	662127	8236	18	-	SK1G00039393	SK1T00039393-RA	4223	lacZ	KAB8085246.1 hypothetical protein EE612_008019 [Oryza sativa]	Metabolism;Metabolism;Metabolism;Metabolism	Global and overview maps;Carbohydrate metabolism;Lipid metabolism;Glycan biosynthesis and metabolism	ko01100//Metabolic pathways;ko00052//Galactose metabolism;ko00600//Sphingolipid metabolism;ko00511//Other glycan degradation	K01190;K01190;K01190;K01190	GO:0009341//beta-galactosidase complex	GO:0004553//hydrolase activity, hydrolyzing O-glycosyl compounds;GO:0004565//beta-galactosidase activity	GO:0005975//carbohydrate metabolic process	-
IP_peak_94	cluster1	660190	660524	335	660381	51.5	2.44738	Intron (SK1T00039393-RA/SK1G00039393, intron 4 of 17)	cluster1	653892	662127	8236	18	-	SK1G00039393	SK1T00039393-RA	1746	lacZ	KAB8085246.1 hypothetical protein EE612_008019 [Oryza sativa]	Metabolism;Metabolism;Metabolism;Metabolism	Global and overview maps;Carbohydrate metabolism;Lipid metabolism;Glycan biosynthesis and metabolism	ko01100//Metabolic pathways;ko00052//Galactose metabolism;ko00600//Sphingolipid metabolism;ko00511//Other glycan degradation	K01190;K01190;K01190;K01190	GO:0009341//beta-galactosidase complex	GO:0004553//hydrolase activity, hydrolyzing O-glycosyl compounds;GO:0004565//beta-galactosidase activity	GO:0005975//carbohydrate metabolic process	-
IP_peak_97	cluster1	684942	685735	794	685169	39	2.52838	Intron (SK1T00039395-RA/SK1G00039395, intron 1 of 8)	cluster1	684075	691332	7258	9	+	SK1G00039395	SK1T00039395-RA	1094	PRAF1	XP_015611264.1 PH, RCC1 and FYVE domains-containing protein 1 [Oryza sativa Japonica Group]	-	-	-	-	GO:0005938//cell cortex	GO:0005515//protein binding;GO:0005543//phospholipid binding;GO:0046872//metal ion binding	GO:0032065//cortical protein anchoring	-
IP_peak_98	cluster1	690146	690581	436	690401	37	1.97108	Intron (SK1T00039395-RA/SK1G00039395, intron 7 of 8)	cluster1	684075	691332	7258	9	+	SK1G00039395	SK1T00039395-RA	6326	PRAF1	XP_015611264.1 PH, RCC1 and FYVE domains-containing protein 1 [Oryza sativa Japonica Group]	-	-	-	-	GO:0005938//cell cortex	GO:0005515//protein binding;GO:0005543//phospholipid binding;GO:0046872//metal ion binding	GO:0032065//cortical protein anchoring	-
IP_peak_99	cluster1	690950	691350	401	691221	54.5	3.25493	3' UTR	cluster1	692052	697084	5033	8	-	SK1G00039396	SK1T00039396-RA	5863	At3g54460	XP_015611255.1 F-box protein At3g54460 [Oryza sativa Japonica Group]	-	-	-	-	-	GO:0003677//DNA binding;GO:0005515//protein binding;GO:0005524//ATP binding;GO:0008270//zinc ion binding;GO:0016787//hydrolase activity	-	-
IP_peak_100	cluster1	700714	701121	408	700903	38	2.62384	Downstream (<1kb)	cluster1	700994	702228	1235	2	-	SK1G00039398	SK1T00039398-RA	1325	GER8	XP_015644058.1 germin-like protein 1-3 [Oryza sativa Japonica Group]	-	-	-	-	-	-	-	-
IP_peak_102	cluster1	707526	707851	326	707672	31.5	2.29574	Promoter (1-2kb)	cluster1	709603	712510	2908	5	+	SK1G00039399	SK1T00039399-RA	-1931	FIS1A	BAD87890.1 unknown protein [Oryza sativa Japonica Group]	-	-	-	-	-	-	-	-
IP_peak_103	cluster1	722749	723449	701	723207	42.5	2.70537	Intron (SK1T00039401-RA/SK1G00039401, intron 1 of 5)	cluster1	720739	724308	3570	6	-	SK1G00039401	SK1T00039401-RA	1101	UMPS2	XP_015621270.1 uridine 5'-monophosphate synthase [Oryza sativa Japonica Group]	Metabolism;Metabolism	Global and overview maps;Nucleotide metabolism	ko01100//Metabolic pathways;ko00240//Pyrimidine metabolism	K13421;K13421	GO:0005737//cytoplasm	GO:0000310//xanthine phosphoribosyltransferase activity;GO:0003999//adenine phosphoribosyltransferase activity;GO:0004588//orotate phosphoribosyltransferase activity;GO:0004590//orotidine-5'-phosphate decarboxylase activity	GO:0006166//purine ribonucleoside salvage;GO:0006207//'de novo' pyrimidine nucleobase biosynthetic process;GO:0009116//nucleoside metabolic process;GO:0009220//pyrimidine ribonucleotide biosynthetic process;GO:0046110//xanthine metabolic process	-
IP_peak_104	cluster1	727956	728840	885	728112	41.5	2.50566	Exon (SK1T00039402-RA/SK1G00039402, exon 4 of 7)	cluster1	726346	729916	3571	7	-	SK1G00039402	SK1T00039402-RA	1804	UMPS1	EEC72170.1 hypothetical protein OsI_05215 [Oryza sativa Indica Group]	Metabolism;Metabolism	Global and overview maps;Nucleotide metabolism	ko01100//Metabolic pathways;ko00240//Pyrimidine metabolism	K13421;K13421	GO:0005737//cytoplasm	GO:0000310//xanthine phosphoribosyltransferase activity;GO:0003999//adenine phosphoribosyltransferase activity;GO:0004588//orotate phosphoribosyltransferase activity;GO:0004590//orotidine-5'-phosphate decarboxylase activity	GO:0006166//purine ribonucleoside salvage;GO:0006207//'de novo' pyrimidine nucleobase biosynthetic process;GO:0009116//nucleoside metabolic process;GO:0009220//pyrimidine ribonucleotide biosynthetic process;GO:0046110//xanthine metabolic process	-
IP_peak_105	cluster1	732544	732991	448	732806	39.5	2.58313	Intron (SK1T00039403-RA/SK1G00039403, intron 4 of 8)	cluster1	730732	734514	3783	9	-	SK1G00039403	SK1T00039403-RA	1708	AGD11	EAY77240.1 hypothetical protein OsI_05214 [Oryza sativa Indica Group]	Cellular Processes	Transport and catabolism	ko04144//Endocytosis	K12486	-	GO:0005096//GTPase activator activity	-	-
IP_peak_106	cluster1	737931	738681	751	738125	40	2.65125	Intron (SK1T00039404-RA/SK1G00039404, intron 3 of 17)	cluster1	736943	743805	6863	18	+	SK1G00039404	SK1T00039404-RA	1182	FY	EEE56009.1 hypothetical protein OsJ_04772 [Oryza sativa Japonica Group]	Genetic Information Processing	Translation	ko03015//mRNA surveillance pathway	K15542	-	GO:0005515//protein binding	-	-
IP_peak_107	cluster1	739773	740547	775	739896	39	2.28873	Intron (SK1T00039404-RA/SK1G00039404, intron 8 of 17)	cluster1	736943	743805	6863	18	+	SK1G00039404	SK1T00039404-RA	2953	FY	EEE56009.1 hypothetical protein OsJ_04772 [Oryza sativa Japonica Group]	Genetic Information Processing	Translation	ko03015//mRNA surveillance pathway	K15542	-	GO:0005515//protein binding	-	-
IP_peak_108	cluster1	741763	742221	459	741870	34.5	2.19888	Intron (SK1T00039404-RA/SK1G00039404, intron 14 of 17)	cluster1	736943	743805	6863	18	+	SK1G00039404	SK1T00039404-RA	4927	FY	EEE56009.1 hypothetical protein OsJ_04772 [Oryza sativa Japonica Group]	Genetic Information Processing	Translation	ko03015//mRNA surveillance pathway	K15542	-	GO:0005515//protein binding	-	-
IP_peak_109	cluster1	744703	745057	355	744891	38.5	2.24336	Exon (SK1T00039405-RA/SK1G00039405, exon 8 of 10)	cluster1	743705	747643	3939	10	-	SK1G00039405	SK1T00039405-RA	2752	At3g54510	KAB8085230.1 hypothetical protein EE612_007996 [Oryza sativa]	-	-	-	-	GO:0016020//membrane	-	-	-
IP_peak_110	cluster1	745560	747132	1573	746093	40.5	2.46924	Exon (SK1T00039405-RA/SK1G00039405, exon 5 of 10)	cluster1	743705	747643	3939	10	-	SK1G00039405	SK1T00039405-RA	1550	At3g54510	KAB8085230.1 hypothetical protein EE612_007996 [Oryza sativa]	-	-	-	-	GO:0016020//membrane	-	-	-
IP_peak_111	cluster1	748589	749346	758	748919	31.5	2.40311	Intron (SK1T00039406-RA/SK1G00039406, intron 2 of 9)	cluster1	747946	753019	5074	10	+	SK1G00039406	SK1T00039406-RA	973	PLPBP	XP_015633399.1 pyridoxal phosphate homeostasis protein isoform X1 [Oryza sativa Japonica Group]	-	-	-	-	-	-	-	-
IP_peak_112	cluster1	775806	776162	357	775943	45	2.53174	Intron (SK1T00039411-RA/SK1G00039411, intron 6 of 10)	cluster1	768096	782096	14001	11	-	SK1G00039411	SK1T00039411-RA	6153	GSTU8	OEL28585.1 putative glutathione S-transferase [Dichanthelium oligosanthes]	Metabolism;Metabolism	Global and overview maps;Metabolism of other amino acids	ko01100//Metabolic pathways;ko00480//Glutathione metabolism	K00799;K00799	-	GO:0005515//protein binding;GO:0015035//protein disulfide oxidoreductase activity;GO:0016034//maleylacetoacetate isomerase activity	GO:0006559//L-phenylalanine catabolic process;GO:0006572//tyrosine catabolic process;GO:0006749//glutathione metabolic process;GO:0006790//sulfur compound metabolic process;GO:0042965//glutaredoxin biosynthetic process;GO:0045454//cell redox homeostasis;GO:0055114//oxidation-reduction process	-
IP_peak_113	cluster1	778942	779463	522	779367	44.5	2.60263	Intron (SK1T00039411-RA/SK1G00039411, intron 4 of 10)	cluster1	768096	782096	14001	11	-	SK1G00039411	SK1T00039411-RA	2729	GSTU8	OEL28585.1 putative glutathione S-transferase [Dichanthelium oligosanthes]	Metabolism;Metabolism	Global and overview maps;Metabolism of other amino acids	ko01100//Metabolic pathways;ko00480//Glutathione metabolism	K00799;K00799	-	GO:0005515//protein binding;GO:0015035//protein disulfide oxidoreductase activity;GO:0016034//maleylacetoacetate isomerase activity	GO:0006559//L-phenylalanine catabolic process;GO:0006572//tyrosine catabolic process;GO:0006749//glutathione metabolic process;GO:0006790//sulfur compound metabolic process;GO:0042965//glutaredoxin biosynthetic process;GO:0045454//cell redox homeostasis;GO:0055114//oxidation-reduction process	-
IP_peak_115	cluster1	810177	811283	1107	810699	35.5	2.14125	Intron (SK1T00039414-RA/SK1G00039414, intron 2 of 7)	cluster1	809202	813856	4655	8	+	SK1G00039414	SK1T00039414-RA	1497	OSB2	XP_015622390.1 protein OSB3, chloroplastic/mitochondrial [Oryza sativa Japonica Group]	-	-	-	-	-	GO:0003697//single-stranded DNA binding	GO:0006260//DNA replication;GO:0006281//DNA repair;GO:0006310//DNA recombination	-
IP_peak_116	cluster1	833312	834009	698	833749	38	2.20471	Downstream (2-3kb)	cluster1	833022	833246	225	1	+	SK1G00039416	SK1T00039416-RA	727	--	-	-	-	-	-	-	-	-	-
IP_peak_123	cluster1	877444	877806	363	877606	42	2.59191	Exon (SK1T00039421-RA/SK1G00039421, exon 6 of 7)	cluster1	875710	877903	2194	7	+	SK1G00039421	SK1T00039421-RA	1896	PROC1	XP_015610789.1 pyrroline-5-carboxylate reductase [Oryza sativa Japonica Group]	Metabolism;Metabolism;Metabolism;Metabolism	Global and overview maps;Global and overview maps;Global and overview maps;Amino acid metabolism	ko01100//Metabolic pathways;ko01110//Biosynthesis of secondary metabolites;ko01230//Biosynthesis of amino acids;ko00330//Arginine and proline metabolism	K00286;K00286;K00286;K00286	-	GO:0004665//prephenate dehydrogenase (NADP+) activity;GO:0004735//pyrroline-5-carboxylate reductase activity;GO:0005355//glucose transmembrane transporter activity;GO:0008679//2-hydroxy-3-oxopropionate reductase activity;GO:0008977//prephenate dehydrogenase activity;GO:0016616//oxidoreductase activity, acting on the CH-OH group of donors, NAD or NADP as acceptor;GO:0016651//oxidoreductase activit…	GO:0006561//proline biosynthetic process;GO:0006571//tyrosine biosynthetic process;GO:0046168//glycerol-3-phosphate catabolic process;GO:0055114//oxidation-reduction process	-
IP_peak_124	cluster1	882404	882710	307	882495	44	2.88916	Promoter (1-2kb)	cluster1	878210	880729	2520	3	-	SK1G00039422	SK1T00039422-RA	-1766	--	EEC72155.1 hypothetical protein OsI_05189 [Oryza sativa Indica Group]	-	-	-	-	-	-	-	-
IP_peak_125	cluster1	885255	885763	509	885464	41.5	2.73721	Promoter (1-2kb)	cluster1	882953	884281	1329	1	-	SK1G00039423	SK1T00039423-RA	-1183	SCL3	XP_015610769.1 scarecrow-like protein 3 isoform X1 [Oryza sativa Japonica Group]	-	-	-	-	-	-	-	GRAS
IP_peak_127	cluster1	902293	903123	831	902983	37.5	2.72717	Intron (SK1T00039425-RA/SK1G00039425, intron 5 of 15)	cluster1	897796	905690	7895	16	-	SK1G00039425	SK1T00039425-RA	2707	MUS81	XP_015622535.1 crossover junction endonuclease MUS81 isoform X1 [Oryza sativa Japonica Group]	Genetic Information Processing	Replication and repair	ko03440//Homologous recombination	K08991	-	GO:0003677//DNA binding;GO:0004518//nuclease activity	-	-
IP_peak_128	cluster1	904494	905326	833	904943	49.5	2.68504	Intron (SK1T00039425-RA/SK1G00039425, intron 1 of 15)	cluster1	897796	905690	7895	16	-	SK1G00039425	SK1T00039425-RA	747	MUS81	XP_015622535.1 crossover junction endonuclease MUS81 isoform X1 [Oryza sativa Japonica Group]	Genetic Information Processing	Replication and repair	ko03440//Homologous recombination	K08991	-	GO:0003677//DNA binding;GO:0004518//nuclease activity	-	-
IP_peak_129	cluster1	918253	918636	384	918460	40.5	2.7085	5' UTR	cluster1	917148	918495	1348	2	-	SK1G00039428	SK1T00039428-RA	35	BANGLUC	XP_015651097.1 glucan endo-1,3-beta-glucosidase GV [Oryza sativa Japonica Group]	-	-	-	-	-	GO:0004553//hydrolase activity, hydrolyzing O-glycosyl compounds	GO:0005975//carbohydrate metabolic process	-
IP_peak_130	cluster1	919196	919639	444	919282	43.5	3.20297	Promoter (<=1kb)	cluster1	917148	918495	1348	2	-	SK1G00039428	SK1T00039428-RA	-787	BANGLUC	XP_015651097.1 glucan endo-1,3-beta-glucosidase GV [Oryza sativa Japonica Group]	-	-	-	-	-	GO:0004553//hydrolase activity, hydrolyzing O-glycosyl compounds	GO:0005975//carbohydrate metabolic process	-
IP_peak_131	cluster1	960729	961149	421	960952	33.5	2.04089	Intron (SK1T00039434-RA/SK1G00039434, intron 7 of 13)	cluster1	958016	962949	4934	14	+	SK1G00039434	SK1T00039434-RA	2936	RNP1	XP_015641898.1 RNA-binding protein Musashi homolog 2 isoform X1 [Oryza sativa Japonica Group]	Genetic Information Processing	Translation	ko03015//mRNA surveillance pathway	K14411	-	GO:0003676//nucleic acid binding	GO:0008380//RNA splicing	-
IP_peak_132	cluster1	962436	962809	374	962626	39.5	2.63596	Promoter (<=1kb)	cluster1	963444	966085	2642	6	+	SK1G00039435	SK1T00039435-RA	-818	BAT1	BAD88022.1 putative GABA-specific permease [Oryza sativa Japonica Group]	-	-	-	-	GO:0016020//membrane;GO:0016021//integral component of membrane	GO:0015171//amino acid transmembrane transporter activity;GO:0022857//transmembrane transporter activity	GO:0006865//amino acid transport;GO:0055085//transmembrane transport	-
IP_peak_133	cluster1	964204	964492	289	964376	39.5	2.25475	Intron (SK1T00039435-RA/SK1G00039435, intron 3 of 5)	cluster1	963444	966085	2642	6	+	SK1G00039435	SK1T00039435-RA	932	BAT1	BAD88022.1 putative GABA-specific permease [Oryza sativa Japonica Group]	-	-	-	-	GO:0016020//membrane;GO:0016021//integral component of membrane	GO:0015171//amino acid transmembrane transporter activity;GO:0022857//transmembrane transporter activity	GO:0006865//amino acid transport;GO:0055085//transmembrane transport	-
IP_peak_134	cluster1	990517	991776	1260	991316	40.6666666666667	2.64213333333333	Exon (SK1T00039438-RA/SK1G00039438, exon 4 of 15)	cluster1	989229	1001542	12314	15	+	SK1G00039438	SK1T00039438-RA	2087	At3g10140	OEL37777.1 Glucan endo-1,3-beta-glucosidase GII [Dichanthelium oligosanthes]	-	-	-	-	GO:0005737//cytoplasm	GO:0003677//DNA binding;GO:0003697//single-stranded DNA binding;GO:0004553//hydrolase activity, hydrolyzing O-glycosyl compounds;GO:0005524//ATP binding;GO:0008094//DNA-dependent ATPase activity;GO:0009044//xylan 1,4-beta-xylosidase activity;GO:0016818//hydrolase activity, acting on acid anhydrides, in phosphorus-containing anhydrides	GO:0005975//carbohydrate metabolic process;GO:0006281//DNA repair;GO:0006310//DNA recombination;GO:0009432//SOS response;GO:0032297//negative regulation of DNA-dependent DNA replication initiation	-
IP_peak_135	cluster1	992228	992834	607	992755	43	2.18128	Intron (SK1T00039438-RA/SK1G00039438, intron 8 of 14)	cluster1	989229	1001542	12314	15	+	SK1G00039438	SK1T00039438-RA	3526	At3g10140	OEL37777.1 Glucan endo-1,3-beta-glucosidase GII [Dichanthelium oligosanthes]	-	-	-	-	GO:0005737//cytoplasm	GO:0003677//DNA binding;GO:0003697//single-stranded DNA binding;GO:0004553//hydrolase activity, hydrolyzing O-glycosyl compounds;GO:0005524//ATP binding;GO:0008094//DNA-dependent ATPase activity;GO:0009044//xylan 1,4-beta-xylosidase activity;GO:0016818//hydrolase activity, acting on acid anhydrides, in phosphorus-containing anhydrides	GO:0005975//carbohydrate metabolic process;GO:0006281//DNA repair;GO:0006310//DNA recombination;GO:0009432//SOS response;GO:0032297//negative regulation of DNA-dependent DNA replication initiation	-
IP_peak_136	cluster1	1008222	1008549	328	1008409	34.5	2.54865	Intron (SK1T00039440-RA/SK1G00039440, intron 1 of 1)	cluster1	1008015	1011652	3638	2	+	SK1G00039440	SK1T00039440-RA	394	BANGLUC	XP_015627362.1 lichenase-2 [Oryza sativa Japonica Group]	-	-	-	-	-	GO:0004553//hydrolase activity, hydrolyzing O-glycosyl compounds	GO:0005975//carbohydrate metabolic process	-
IP_peak_137	cluster1	1011511	1011962	452	1011711	44.5	3.30572	Promoter (1-2kb)	cluster1	1013271	1014593	1323	1	+	SK1G00039441	SK1T00039441-RA	-1560	--	XP_015646178.1 uncharacterized protein LOC4326053 [Oryza sativa Japonica Group]	-	-	-	-	-	GO:0005515//protein binding	-	-
IP_peak_138	cluster1	1024836	1025206	371	1025013	30	2.30187	Promoter (<=1kb)	cluster1	1025775	1027028	1254	3	+	SK1G00039444	SK1T00039444-RA	-762	--	CAD39341.2 OSJNBa0094O15.10 [Oryza sativa Japonica Group]	-	-	-	-	-	-	-	-
IP_peak_139	cluster1	1036352	1036819	468	1036696	30.5	2.52744	Promoter (1-2kb)	cluster1	1034439	1035395	957	1	-	SK1G00039445	SK1T00039445-RA	-1301	BANGLUC	BAD87992.1 putative beta-1,3-glucanase precursor [Oryza sativa Japonica Group]	-	-	-	-	-	GO:0004553//hydrolase activity, hydrolyzing O-glycosyl compounds	GO:0005975//carbohydrate metabolic process	-
IP_peak_140	cluster1	1038211	1038702	492	1038321	34	2.53103	Downstream (<1kb)	cluster1	1038730	1040091	1362	2	-	SK1G00039446	SK1T00039446-RA	1770	VIT_06s0061g00120	EAY77205.1 hypothetical protein OsI_05174 [Oryza sativa Indica Group]	-	-	-	-	-	GO:0004553//hydrolase activity, hydrolyzing O-glycosyl compounds	GO:0005975//carbohydrate metabolic process	-
IP_peak_141	cluster1	1045470	1046034	565	1045554	27	2.5114	Exon (SK1T00039447-RA/SK1G00039447, exon 1 of 2)	cluster1	1044184	1045605	1422	2	-	SK1G00039447	SK1T00039447-RA	51	BANGLUC	EAY77204.1 hypothetical protein OsI_05173 [Oryza sativa Indica Group]	-	-	-	-	-	GO:0004553//hydrolase activity, hydrolyzing O-glycosyl compounds	GO:0005975//carbohydrate metabolic process	-
IP_peak_142	cluster1	1064472	1064854	383	1064608	64.5	3.7292	Promoter (<=1kb)	cluster1	1062402	1064136	1735	2	-	SK1G00039448	SK1T00039448-RB	-472	VIT_06s0061g00120	EAY77172.1 hypothetical protein OsI_05142 [Oryza sativa Indica Group]	-	-	-	-	-	GO:0004553//hydrolase activity, hydrolyzing O-glycosyl compounds	GO:0005975//carbohydrate metabolic process	-
IP_peak_145	cluster1	1095149	1096199	1051	1095633	38.5	2.64419	Intron (SK1T00039450-RA/SK1G00039450, intron 1 of 8)	cluster1	1093689	1102065	8377	9	+	SK1G00039450	SK1T00039450-RA	1944	HXK3	EAY77169.1 hypothetical protein OsI_05139 [Oryza sativa Indica Group]	Metabolism;Metabolism;Metabolism;Metabolism;Metabolism;Metabolism;Metabolism;Metabolism	Global and overview maps;Global and overview maps;Global and overview maps;Carbohydrate metabolism;Carbohydrate metabolism;Carbohydrate metabolism;Carbohydrate metabolism;Carbohydrate metabolism	ko01100//Metabolic pathways;ko01110//Biosynthesis of secondary metabolites;ko01200//Carbon metabolism;ko00500//Starch and sucrose metabolism;ko00010//Glycolysis / Gluconeogenesis;ko00520//Amino sugar and nucleotide sugar metabolism;ko00051//Fructose and mannose metabolism;ko00052//Galactose metabolism	K00844;K00844;K00844;K00844;K00844;K00844;K00844;K00844	-	GO:0003677//DNA binding;GO:0005524//ATP binding;GO:0016773//phosphotransferase activity, alcohol group as acceptor	GO:0005975//carbohydrate metabolic process	-
IP_peak_146	cluster1	1102969	1103762	794	1103298	46	2.93603	Downstream (2-3kb)	cluster1	1105418	1107463	2046	5	-	SK1G00039451	SK1T00039451-RA	4165	CKX4	XP_015621343.1 cytokinin dehydrogenase 4 [Oryza sativa Japonica Group]	Metabolism	Metabolism of terpenoids and polyketides	ko00908//Zeatin biosynthesis	K00279	-	GO:0008891//glycolate oxidase activity;GO:0016491//oxidoreductase activity;GO:0019139//cytokinin dehydrogenase activity;GO:0050660//flavin adenine dinucleotide binding	GO:0005975//carbohydrate metabolic process;GO:0009690//cytokinin metabolic process;GO:0055114//oxidation-reduction process	-
IP_peak_147	cluster1	1111544	1112036	493	1111787	42	2.79259	Promoter (1-2kb)	cluster1	1113752	1114502	751	2	+	SK1G00000166	SK1T00000166-RA	-1965	--	-	-	-	-	-	-	-	-	-
IP_peak_153	cluster1	1148255	1148606	352	1148435	38.5	2.98503	Downstream (2-3kb)	cluster1	1150843	1153392	2550	2	-	SK1G00039453	SK1T00039453-RA	4957	--	BAF07266.1 Os01g0939800 [Oryza sativa Japonica Group]	-	-	-	-	-	-	-	-
IP_peak_154	cluster1	1148878	1149433	556	1149172	43.5	2.44093	Downstream (1-2kb)	cluster1	1150843	1153392	2550	2	-	SK1G00039453	SK1T00039453-RA	4220	--	BAF07266.1 Os01g0939800 [Oryza sativa Japonica Group]	-	-	-	-	-	-	-	-
IP_peak_155	cluster1	1150692	1151238	547	1150962	33.5	2.57006	Exon (SK1T00039453-RA/SK1G00039453, exon 2 of 2)	cluster1	1150843	1153392	2550	2	-	SK1G00039453	SK1T00039453-RA	2430	--	BAF07266.1 Os01g0939800 [Oryza sativa Japonica Group]	-	-	-	-	-	-	-	-
IP_peak_156	cluster1	1154969	1156217	1249	1155590	37.5	2.98538	Downstream (1-2kb)	cluster1	1150843	1153392	2550	2	-	SK1G00039453	SK1T00039453-RA	-2198	--	BAF07266.1 Os01g0939800 [Oryza sativa Japonica Group]	-	-	-	-	-	-	-	-
IP_peak_157	cluster1	1156861	1157780	920	1157576	37	2.65314	3' UTR	cluster1	1157426	1161684	4259	3	-	SK1G00039454	SK1T00039454-RA	4108	SFGH	XP_015621310.1 S-formylglutathione hydrolase isoform X2 [Oryza sativa Japonica Group]	-	-	-	-	-	GO:0018738//S-formylglutathione hydrolase activity	GO:0046292//formaldehyde metabolic process	-
IP_peak_158	cluster1	1158502	1159215	714	1159060	42.5	2.99475	3' UTR	cluster1	1157426	1161684	4259	3	-	SK1G00039454	SK1T00039454-RA	2624	SFGH	XP_015621310.1 S-formylglutathione hydrolase isoform X2 [Oryza sativa Japonica Group]	-	-	-	-	-	GO:0018738//S-formylglutathione hydrolase activity	GO:0046292//formaldehyde metabolic process	-
IP_peak_159	cluster1	1159548	1160424	877	1160140	45.5	2.6964	Intron (SK1T00039454-RA/SK1G00039454, intron 2 of 2)	cluster1	1157426	1161684	4259	3	-	SK1G00039454	SK1T00039454-RA	1544	SFGH	XP_015621310.1 S-formylglutathione hydrolase isoform X2 [Oryza sativa Japonica Group]	-	-	-	-	-	GO:0018738//S-formylglutathione hydrolase activity	GO:0046292//formaldehyde metabolic process	-
IP_peak_160	cluster1	1162790	1163475	686	1162987	44.5	3.04935	Promoter (1-2kb)	cluster1	1157426	1161684	4259	3	-	SK1G00039454	SK1T00039454-RA	-1303	SFGH	XP_015621310.1 S-formylglutathione hydrolase isoform X2 [Oryza sativa Japonica Group]	-	-	-	-	-	GO:0018738//S-formylglutathione hydrolase activity	GO:0046292//formaldehyde metabolic process	-
IP_peak_161	cluster1	1176679	1177146	468	1176967	35	2.15477	Promoter (1-2kb)	cluster1	1178847	1181895	3049	6	+	SK1G00039458	SK1T00039458-RA	-1880	--	XP_015633194.1 mediator of DNA damage checkpoint protein 1 [Oryza sativa Japonica Group]	-	-	-	-	-	-	-	-
IP_peak_162	cluster1	1178947	1179735	789	1179569	54	3.25125	Exon (SK1T00039458-RA/SK1G00039458, exon 1 of 6)	cluster1	1178847	1181895	3049	6	+	SK1G00039458	SK1T00039458-RA	722	--	XP_015633194.1 mediator of DNA damage checkpoint protein 1 [Oryza sativa Japonica Group]	-	-	-	-	-	-	-	-
IP_peak_163	cluster1	1181098	1181444	347	1181271	32	1.95462	Promoter (1-2kb)	cluster1	1183179	1184793	1615	3	+	SK1G00039459	SK1T00039459-RA	-1908	--	EAY77162.1 hypothetical protein OsI_05128 [Oryza sativa Indica Group]	-	-	-	-	-	-	-	-
IP_peak_164	cluster1	1184454	1184783	330	1184523	32.5	1.97036	Exon (SK1T00039459-RA/SK1G00039459, exon 1 of 3)	cluster1	1183179	1184793	1615	3	+	SK1G00039459	SK1T00039459-RA	1344	--	EAY77162.1 hypothetical protein OsI_05128 [Oryza sativa Indica Group]	-	-	-	-	-	-	-	-
IP_peak_165	cluster1	1192769	1193085	317	1192846	39	2.32547	Promoter (<=1kb)	cluster1	1185965	1192658	6694	7	-	SK1G00039460	SK1T00039460-RA	-188	ACA1	XP_015621941.1 calcium-transporting ATPase 1, plasma membrane-type [Oryza sativa Japonica Group]	-	-	-	-	GO:0031004//potassium ion-transporting ATPase complex	GO:0004008//copper-exporting ATPase activity;GO:0004647//phosphoserine phosphatase activity;GO:0005375//copper ion transmembrane transporter activity;GO:0005388//calcium-transporting ATPase activity;GO:0005516//calmodulin binding;GO:0008556//potassium-transporting ATPase activity;GO:0008967//phosphoglycolate phosphatase activity;GO:0015434//cadmium-transporting ATPase activity;GO:0015444//magnesi…	GO:0006545//glycine biosynthetic process;GO:0006564//L-serine biosynthetic process;GO:0006813//potassium ion transport;GO:0006816//calcium ion transport;GO:0006825//copper ion transport;GO:0008152//metabolic process;GO:0015691//cadmium ion transport;GO:0015693//magnesium ion transport;GO:0030001//metal ion transport	-
IP_peak_166	cluster1	1193811	1194158	348	1193995	42	2.68827	Exon (SK1T00039461-RA/SK1G00039461, exon 2 of 3)	cluster1	1193611	1194988	1378	3	-	SK1G00039461	SK1T00039461-RA	993	--	BAB89724.1 unknown protein [Oryza sativa Japonica Group]	Metabolism;Metabolism	Global and overview maps;Glycan biosynthesis and metabolism	ko01100//Metabolic pathways;ko00563//Glycosylphosphatidylinositol(GPI)-anchor biosynthesis	K11001;K11001	GO:0016020//membrane;GO:0030176//integral component of endoplasmic reticulum membrane	GO:0030234//enzyme regulator activity;GO:0051082//unfolded protein binding	GO:0017004//cytochrome complex assembly;GO:0019348//dolichol metabolic process	-
IP_peak_167	cluster1	1206012	1206469	458	1206160	35	2.11699	Exon (SK1T00039463-RA/SK1G00039463, exon 4 of 6)	cluster1	1204302	1209137	4836	6	+	SK1G00039463	SK1T00039463-RA	1858	--	XP_015622299.1 uncharacterized protein LOC4326504 [Oryza sativa Japonica Group]	-	-	-	-	-	-	-	-
IP_peak_168	cluster1	1215319	1215652	334	1215428	34	1.95041	Exon (SK1T00039465-RA/SK1G00039465, exon 7 of 9)	cluster1	1214415	1219453	5039	9	-	SK1G00039465	SK1T00039465-RA	4025	BRN1	XP_015610705.1 RNA-binding protein BRN1 [Oryza sativa Japonica Group]	-	-	-	-	GO:0005634//nucleus;GO:0005737//cytoplasm	GO:0003676//nucleic acid binding;GO:0003723//RNA binding;GO:0003824//catalytic activity;GO:0004535//poly(A)-specific ribonuclease activity;GO:0008121//ubiquinol-cytochrome-c reductase activity;GO:0046872//metal ion binding	GO:0006402//mRNA catabolic process;GO:0008380//RNA splicing	-
IP_peak_169	cluster1	1216508	1216973	466	1216761	38.5	2.1755	Exon (SK1T00039465-RA/SK1G00039465, exon 3 of 9)	cluster1	1214415	1219453	5039	9	-	SK1G00039465	SK1T00039465-RA	2692	BRN1	XP_015610705.1 RNA-binding protein BRN1 [Oryza sativa Japonica Group]	-	-	-	-	GO:0005634//nucleus;GO:0005737//cytoplasm	GO:0003676//nucleic acid binding;GO:0003723//RNA binding;GO:0003824//catalytic activity;GO:0004535//poly(A)-specific ribonuclease activity;GO:0008121//ubiquinol-cytochrome-c reductase activity;GO:0046872//metal ion binding	GO:0006402//mRNA catabolic process;GO:0008380//RNA splicing	-
IP_peak_170	cluster1	1220365	1220910	546	1220719	34	2.21616	Promoter (1-2kb)	cluster1	1214415	1219453	5039	9	-	SK1G00039465	SK1T00039465-RA	-1266	BRN1	XP_015610705.1 RNA-binding protein BRN1 [Oryza sativa Japonica Group]	-	-	-	-	GO:0005634//nucleus;GO:0005737//cytoplasm	GO:0003676//nucleic acid binding;GO:0003723//RNA binding;GO:0003824//catalytic activity;GO:0004535//poly(A)-specific ribonuclease activity;GO:0008121//ubiquinol-cytochrome-c reductase activity;GO:0046872//metal ion binding	GO:0006402//mRNA catabolic process;GO:0008380//RNA splicing	-
IP_peak_171	cluster1	1227700	1228183	484	1227862	39	2.45195	Exon (SK1T00039467-RA/SK1G00039467, exon 1 of 1)	cluster1	1226081	1228831	2751	1	-	SK1G00039467	SK1T00039467-RA	969	PCMP-E2	EAY77155.1 hypothetical protein OsI_05121 [Oryza sativa Indica Group]	-	-	-	-	-	-	-	-
IP_peak_172	cluster1	1229612	1229980	369	1229866	38.5	2.44089	Promoter (1-2kb)	cluster1	1226081	1228831	2751	1	-	SK1G00039467	SK1T00039467-RA	-1035	PCMP-E2	EAY77155.1 hypothetical protein OsI_05121 [Oryza sativa Indica Group]	-	-	-	-	-	-	-	-
IP_peak_173	cluster1	1252264	1252884	621	1252441	42	2.80568	Promoter (<=1kb)	cluster1	1253324	1269524	16201	13	+	SK1G00039471	SK1T00039471-RA	-883	RGA2	XP_015649424.1 disease resistance protein RGA2 [Oryza sativa Japonica Group]	-	-	-	-	GO:0005575//cellular_component	GO:0003674//molecular_function;GO:0005102//receptor binding;GO:0005515//protein binding;GO:0005524//ATP binding;GO:0016887//ATPase activity;GO:0043531//ADP binding	GO:0008150//biological_process;GO:0030155//regulation of cell adhesion;GO:0030334//regulation of cell migration;GO:0045995//regulation of embryonic development	-
IP_peak_174	cluster1	1253706	1254188	483	1253960	42	3.13942	Exon (SK1T00039471-RA/SK1G00039471, exon 2 of 13)	cluster1	1253324	1269524	16201	13	+	SK1G00039471	SK1T00039471-RA	636	RGA2	XP_015649424.1 disease resistance protein RGA2 [Oryza sativa Japonica Group]	-	-	-	-	GO:0005575//cellular_component	GO:0003674//molecular_function;GO:0005102//receptor binding;GO:0005515//protein binding;GO:0005524//ATP binding;GO:0016887//ATPase activity;GO:0043531//ADP binding	GO:0008150//biological_process;GO:0030155//regulation of cell adhesion;GO:0030334//regulation of cell migration;GO:0045995//regulation of embryonic development	-
IP_peak_175	cluster1	1254550	1254868	319	1254649	29.5	2.25748	Exon (SK1T00039471-RA/SK1G00039471, exon 2 of 13)	cluster1	1253324	1269524	16201	13	+	SK1G00039471	SK1T00039471-RA	1325	RGA2	XP_015649424.1 disease resistance protein RGA2 [Oryza sativa Japonica Group]	-	-	-	-	GO:0005575//cellular_component	GO:0003674//molecular_function;GO:0005102//receptor binding;GO:0005515//protein binding;GO:0005524//ATP binding;GO:0016887//ATPase activity;GO:0043531//ADP binding	GO:0008150//biological_process;GO:0030155//regulation of cell adhesion;GO:0030334//regulation of cell migration;GO:0045995//regulation of embryonic development	-
IP_peak_176	cluster1	1257446	1258074	629	1257795	33	1.96369	Exon (SK1T00039471-RA/SK1G00039471, exon 3 of 13)	cluster1	1253324	1269524	16201	13	+	SK1G00039471	SK1T00039471-RA	4471	RGA2	XP_015649424.1 disease resistance protein RGA2 [Oryza sativa Japonica Group]	-	-	-	-	GO:0005575//cellular_component	GO:0003674//molecular_function;GO:0005102//receptor binding;GO:0005515//protein binding;GO:0005524//ATP binding;GO:0016887//ATPase activity;GO:0043531//ADP binding	GO:0008150//biological_process;GO:0030155//regulation of cell adhesion;GO:0030334//regulation of cell migration;GO:0045995//regulation of embryonic development	-
IP_peak_177	cluster1	1258692	1260474	1783	1259523	43	2.74614	Exon (SK1T00039471-RA/SK1G00039471, exon 3 of 13)	cluster1	1253324	1269524	16201	13	+	SK1G00039471	SK1T00039471-RA	6199	RGA2	XP_015649424.1 disease resistance protein RGA2 [Oryza sativa Japonica Group]	-	-	-	-	GO:0005575//cellular_component	GO:0003674//molecular_function;GO:0005102//receptor binding;GO:0005515//protein binding;GO:0005524//ATP binding;GO:0016887//ATPase activity;GO:0043531//ADP binding	GO:0008150//biological_process;GO:0030155//regulation of cell adhesion;GO:0030334//regulation of cell migration;GO:0045995//regulation of embryonic development	-
IP_peak_178	cluster1	1269553	1270334	782	1270115	44.5	2.39443	Promoter (<=1kb)	cluster1	1270959	1288575	17617	7	+	SK1G00039472	SK1T00039472-RA	-844	CLP	OEL21144.1 Basic 7S globulin 2 [Dichanthelium oligosanthes]	-	-	-	-	-	-	-	-
IP_peak_180	cluster1	1305651	1306476	826	1306309	63.5	3.87823	Intron (SK1T00039476-RA/SK1G00039476, intron 1 of 7)	cluster1	1305280	1310460	5181	8	+	SK1G00039476	SK1T00039476-RA	1029	PVA22	XP_015620641.1 vesicle-associated protein 1-2 [Oryza sativa Japonica Group]	-	-	-	-	-	GO:0005524//ATP binding	GO:0006260//DNA replication;GO:0007059//chromosome segregation;GO:0030261//chromosome condensation	-
IP_peak_181	cluster1	1311923	1312316	394	1312096	40	2.64006	Promoter (<=1kb)	cluster1	1312645	1315299	2655	2	+	SK1G00039477	SK1T00039477-RA	-549	--	XP_015620623.1 FK506-binding protein 5 isoform X1 [Oryza sativa Japonica Group]	-	-	-	-	-	-	-	-
IP_peak_182	cluster1	1314777	1315189	413	1314908	41	2.59102	Promoter (1-2kb)	cluster1	1316616	1316849	234	1	+	SK1G00039478	SK1T00039478-RA	-1708	--	BAS76104.1 Os01g0936600, partial [Oryza sativa Japonica Group]	-	-	-	-	-	-	-	-
IP_peak_183	cluster1	1322343	1322773	431	1322670	39.5	2.31637	5' UTR	cluster1	1322611	1327167	4557	11	+	SK1G00039480	SK1T00039480-RA	59	faeA	XP_015616791.1 probable feruloyl esterase A [Oryza sativa Japonica Group]	-	-	-	-	-	GO:0016787//hydrolase activity	GO:0006629//lipid metabolic process	-
IP_peak_184	cluster1	1324213	1325396	1184	1324961	37.3333333333333	2.12563666666667	Intron (SK1T00039480-RA/SK1G00039480, intron 8 of 10)	cluster1	1322611	1327167	4557	11	+	SK1G00039480	SK1T00039480-RA	2350	faeA	XP_015616791.1 probable feruloyl esterase A [Oryza sativa Japonica Group]	-	-	-	-	-	GO:0016787//hydrolase activity	GO:0006629//lipid metabolic process	-
IP_peak_185	cluster1	1330528	1331149	622	1330910	49.5	2.812	Intron (SK1T00039481-RA/SK1G00039481, intron 1 of 4)	cluster1	1327282	1331758	4477	5	-	SK1G00039481	SK1T00039481-RA	848	RLCK185	EEC72116.1 hypothetical protein OsI_05101 [Oryza sativa Indica Group]	-	-	-	-	-	GO:0004672//protein kinase activity;GO:0005524//ATP binding	GO:0006468//protein phosphorylation	-
IP_peak_186	cluster1	1338259	1338796	538	1338440	50	2.99896	Promoter (<=1kb)	cluster1	1339383	1341248	1866	3	+	SK1G00039484	SK1T00039484-RA	-943	SDH4	XP_015619484.1 succinate dehydrogenase subunit 4, mitochondrial [Oryza sativa Japonica Group]	-	-	-	-	-	-	-	-
IP_peak_187	cluster1	1349446	1350238	793	1349879	46	2.80126	Intron (SK1T00039486-RA/SK1G00039486, intron 5 of 7)	cluster1	1348229	1353115	4887	8	-	SK1G00039486	SK1T00039486-RA	3236	CYC1-2	XP_015619474.1 cytochrome c1-2, heme protein, mitochondrial [Oryza sativa Japonica Group]	Metabolism;Metabolism	Global and overview maps;Energy metabolism	ko01100//Metabolic pathways;ko00190//Oxidative phosphorylation	K00413;K00413	-	GO:0009055//electron carrier activity;GO:0020037//heme binding	-	-
IP_peak_188	cluster1	1352271	1352775	505	1352471	38.5	2.25501	Intron (SK1T00039486-RA/SK1G00039486, intron 1 of 7)	cluster1	1348229	1353115	4887	8	-	SK1G00039486	SK1T00039486-RA	644	CYC1-2	XP_015619474.1 cytochrome c1-2, heme protein, mitochondrial [Oryza sativa Japonica Group]	Metabolism;Metabolism	Global and overview maps;Energy metabolism	ko01100//Metabolic pathways;ko00190//Oxidative phosphorylation	K00413;K00413	-	GO:0009055//electron carrier activity;GO:0020037//heme binding	-	-
IP_peak_189	cluster1	1354830	1355850	1021	1355338	36	2.24145	Exon (SK1T00039487-RA/SK1G00039487, exon 4 of 15)	cluster1	1354112	1360626	6515	15	+	SK1G00039487	SK1T00039487-RA	1226	SPATA20	XP_015617421.1 spermatogenesis-associated protein 20 isoform X2 [Oryza sativa Japonica Group]	Metabolism;Metabolism	Global and overview maps;Nucleotide metabolism	ko01100//Metabolic pathways;ko00240//Pyrimidine metabolism	K00943;K00943	-	-	-	-
IP_peak_190	cluster1	1356989	1357387	399	1357183	40	2.36782	Intron (SK1T00039487-RA/SK1G00039487, intron 8 of 14)	cluster1	1354112	1360626	6515	15	+	SK1G00039487	SK1T00039487-RA	3071	SPATA20	XP_015617421.1 spermatogenesis-associated protein 20 isoform X2 [Oryza sativa Japonica Group]	Metabolism;Metabolism	Global and overview maps;Nucleotide metabolism	ko01100//Metabolic pathways;ko00240//Pyrimidine metabolism	K00943;K00943	-	-	-	-
IP_peak_191	cluster1	1362745	1364015	1271	1363388	44	2.31339	Exon (SK1T00039488-RA/SK1G00039488, exon 6 of 10)	cluster1	1360506	1366306	5801	10	-	SK1G00039488	SK1T00039488-RA	2918	HAK2	EEC72112.1 hypothetical protein OsI_05095 [Oryza sativa Indica Group]	-	-	-	-	GO:0016020//membrane	GO:0015079//potassium ion transmembrane transporter activity	GO:0006813//potassium ion transport;GO:0071805//potassium ion transmembrane transport	-
IP_peak_192	cluster1	1365478	1365820	343	1365687	38.5	2.14724	Intron (SK1T00039488-RA/SK1G00039488, intron 1 of 9)	cluster1	1360506	1366306	5801	10	-	SK1G00039488	SK1T00039488-RA	619	HAK2	EEC72112.1 hypothetical protein OsI_05095 [Oryza sativa Indica Group]	-	-	-	-	GO:0016020//membrane	GO:0015079//potassium ion transmembrane transporter activity	GO:0006813//potassium ion transport;GO:0071805//potassium ion transmembrane transport	-
IP_peak_193	cluster1	1372760	1373403	644	1373030	44	2.25955	Exon (SK1T00039490-RA/SK1G00039490, exon 5 of 10)	cluster1	1371014	1376045	5032	10	-	SK1G00039490	SK1T00039490-RA	3015	CUL2	EAY77128.1 hypothetical protein OsI_05093 [Oryza sativa Indica Group]	-	-	-	-	-	GO:0031625//ubiquitin protein ligase binding	GO:0006511//ubiquitin-dependent protein catabolic process	-
IP_peak_195	cluster1	1393242	1393907	666	1393356	36.5	2.48602	Intron (SK1T00039491-RA/SK1G00039491, intron 1 of 1)	cluster1	1392501	1400970	8470	2	+	SK1G00039491	SK1T00039491-RA	855	NFYB5	XP_015635864.1 nuclear transcription factor Y subunit B-1 [Oryza sativa Japonica Group]	-	-	-	-	GO:0005669//transcription factor TFIID complex;GO:0071821//FANCM-MHF complex	GO:0003677//DNA binding	GO:0006352//DNA-templated transcription, initiation	NF-YB
IP_peak_196	cluster1	1394591	1395030	440	1394793	33	2.19297	Intron (SK1T00039491-RA/SK1G00039491, intron 1 of 1)	cluster1	1392501	1400970	8470	2	+	SK1G00039491	SK1T00039491-RA	2292	NFYB5	XP_015635864.1 nuclear transcription factor Y subunit B-1 [Oryza sativa Japonica Group]	-	-	-	-	GO:0005669//transcription factor TFIID complex;GO:0071821//FANCM-MHF complex	GO:0003677//DNA binding	GO:0006352//DNA-templated transcription, initiation	NF-YB
IP_peak_198	cluster1	1406748	1407041	294	1406866	31.5	2.04216	Promoter (<=1kb)	cluster1	1407629	1410951	3323	3	+	SK1G00000207	SK1T00000207-RA	-763	GAF1	EAY77125.1 hypothetical protein OsI_05090 [Oryza sativa Indica Group]	-	-	-	-	-	GO:0003677//DNA binding	-	C2H2
IP_peak_199	cluster1	1421247	1421556	310	1421419	36	2.48912	Intron (SK1T00039493-RA/SK1G00039493, intron 2 of 8)	cluster1	1418850	1430321	11472	9	+	SK1G00039493	SK1T00039493-RA	2569	TY3B-G	BAF19594.2 Os06g0493000 [Oryza sativa Japonica Group]	-	-	-	-	-	GO:0003824//catalytic activity;GO:0004190//aspartic-type endopeptidase activity;GO:0008236//serine-type peptidase activity;GO:0016787//hydrolase activity;GO:0070205//2-succinyl-6-hydroxy-2,4-cyclohexadiene-1-carboxylate synthase activity	GO:0006508//proteolysis;GO:0008150//biological_process;GO:0009102//biotin biosynthetic process;GO:0009234//menaquinone biosynthetic process;GO:0015074//DNA integration	-
IP_peak_200	cluster1	1425011	1425559	549	1425271	40.5	2.42888	Exon (SK1T00039493-RA/SK1G00039493, exon 8 of 9)	cluster1	1418850	1430321	11472	9	+	SK1G00039493	SK1T00039493-RA	6421	TY3B-G	BAF19594.2 Os06g0493000 [Oryza sativa Japonica Group]	-	-	-	-	-	GO:0003824//catalytic activity;GO:0004190//aspartic-type endopeptidase activity;GO:0008236//serine-type peptidase activity;GO:0016787//hydrolase activity;GO:0070205//2-succinyl-6-hydroxy-2,4-cyclohexadiene-1-carboxylate synthase activity	GO:0006508//proteolysis;GO:0008150//biological_process;GO:0009102//biotin biosynthetic process;GO:0009234//menaquinone biosynthetic process;GO:0015074//DNA integration	-
IP_peak_201	cluster1	1426402	1426806	405	1426611	44.5	2.37392	Exon (SK1T00039493-RA/SK1G00039493, exon 8 of 9)	cluster1	1418850	1430321	11472	9	+	SK1G00039493	SK1T00039493-RA	7761	TY3B-G	BAF19594.2 Os06g0493000 [Oryza sativa Japonica Group]	-	-	-	-	-	GO:0003824//catalytic activity;GO:0004190//aspartic-type endopeptidase activity;GO:0008236//serine-type peptidase activity;GO:0016787//hydrolase activity;GO:0070205//2-succinyl-6-hydroxy-2,4-cyclohexadiene-1-carboxylate synthase activity	GO:0006508//proteolysis;GO:0008150//biological_process;GO:0009102//biotin biosynthetic process;GO:0009234//menaquinone biosynthetic process;GO:0015074//DNA integration	-
IP_peak_202	cluster1	1437817	1438109	293	1437964	42.5	2.32694	Intron (SK1T00039494-RA/SK1G00039494, intron 11 of 15)	cluster1	1431596	1444294	12699	16	-	SK1G00039494	SK1T00039494-RA	6330	LD	XP_015620702.1 homeobox protein LUMINIDEPENDENS [Oryza sativa Japonica Group]	-	-	-	-	GO:0009523//photosystem II;GO:0009654//photosystem II oxygen evolving complex;GO:0019898//extrinsic component of membrane	GO:0003677//DNA binding;GO:0005509//calcium ion binding;GO:0009036//Type II site-specific deoxyribonuclease activity	GO:0009307//DNA restriction-modification system;GO:0015979//photosynthesis	HB-other
IP_peak_203	cluster1	1439084	1440064	981	1439685	38	2.22917	Intron (SK1T00039494-RA/SK1G00039494, intron 10 of 15)	cluster1	1431596	1444294	12699	16	-	SK1G00039494	SK1T00039494-RA	4609	LD	XP_015620702.1 homeobox protein LUMINIDEPENDENS [Oryza sativa Japonica Group]	-	-	-	-	GO:0009523//photosystem II;GO:0009654//photosystem II oxygen evolving complex;GO:0019898//extrinsic component of membrane	GO:0003677//DNA binding;GO:0005509//calcium ion binding;GO:0009036//Type II site-specific deoxyribonuclease activity	GO:0009307//DNA restriction-modification system;GO:0015979//photosynthesis	HB-other
IP_peak_204	cluster1	1442271	1443521	1251	1442577	50.5	3.00719	Exon (SK1T00039494-RA/SK1G00039494, exon 3 of 16)	cluster1	1431596	1444294	12699	16	-	SK1G00039494	SK1T00039494-RA	1717	LD	XP_015620702.1 homeobox protein LUMINIDEPENDENS [Oryza sativa Japonica Group]	-	-	-	-	GO:0009523//photosystem II;GO:0009654//photosystem II oxygen evolving complex;GO:0019898//extrinsic component of membrane	GO:0003677//DNA binding;GO:0005509//calcium ion binding;GO:0009036//Type II site-specific deoxyribonuclease activity	GO:0009307//DNA restriction-modification system;GO:0015979//photosynthesis	HB-other
IP_peak_206	cluster1	1459470	1459935	466	1459789	44	2.49839	Intron (SK1T00039497-RA/SK1G00039497, intron 1 of 3)	cluster1	1457380	1461920	4541	4	+	SK1G00039497	SK1T00039497-RA	2409	ATG18A	XP_015621196.1 autophagy-related protein 18a [Oryza sativa Japonica Group]	-	-	-	-	-	GO:0005515//protein binding	-	-
IP_peak_207	cluster1	1460421	1461557	1137	1461216	39	2.10227	Intron (SK1T00039497-RA/SK1G00039497, intron 2 of 3)	cluster1	1457380	1461920	4541	4	+	SK1G00039497	SK1T00039497-RA	3836	ATG18A	XP_015621196.1 autophagy-related protein 18a [Oryza sativa Japonica Group]	-	-	-	-	-	GO:0005515//protein binding	-	-
IP_peak_209	cluster1	1495200	1496019	820	1495422	45.5	2.50836	Downstream (2-3kb)	cluster1	1497439	1497816	378	1	+	SK1G00039500	SK1T00039500-RA	-2017	Os01g0933500	XP_015648425.1 flowering-promoting factor 1-like protein 2 [Oryza sativa Japonica Group]	-	-	-	-	-	-	-	-
IP_peak_212	cluster1	1504249	1504801	553	1504471	44.5	2.78803	Intron (SK1T00039501-RA/SK1G00039501, intron 1 of 2)	cluster1	1504202	1505802	1601	3	+	SK1G00039501	SK1T00039501-RA	269	HIPP33	XP_015648384.1 heavy metal-associated isoprenylated plant protein 35 [Oryza sativa Japonica Group]	-	-	-	-	GO:0005576//extracellular region	GO:0008236//serine-type peptidase activity;GO:0045340//mercury ion binding;GO:0046872//metal ion binding	GO:0006508//proteolysis;GO:0015694//mercury ion transport	-
IP_peak_213	cluster1	1518563	1518967	405	1518804	36	2.4136	Intron (SK1T00039506-RA/SK1G00039506, intron 5 of 12)	cluster1	1516176	1521135	4960	13	-	SK1G00039506	SK1T00039506-RA	2331	Kbtbd12	XP_015621601.1 uncharacterized protein LOC4326821 isoform X2 [Oryza sativa Japonica Group]	-	-	-	-	-	GO:0005515//protein binding	-	-
IP_peak_214	cluster1	1519362	1520211	850	1519761	39	2.67677	Exon (SK1T00039506-RA/SK1G00039506, exon 3 of 13)	cluster1	1516176	1521135	4960	13	-	SK1G00039506	SK1T00039506-RA	1374	Kbtbd12	XP_015621601.1 uncharacterized protein LOC4326821 isoform X2 [Oryza sativa Japonica Group]	-	-	-	-	-	GO:0005515//protein binding	-	-
IP_peak_215	cluster1	1528120	1528481	362	1528367	31	2.31649	Promoter (<=1kb)	cluster1	1529216	1533908	4693	8	+	SK1G00039508	SK1T00039508-RA	-849	HAK6	EEC72103.1 hypothetical protein OsI_05069 [Oryza sativa Indica Group]	-	-	-	-	GO:0016020//membrane	GO:0015079//potassium ion transmembrane transporter activity	GO:0006813//potassium ion transport;GO:0071805//potassium ion transmembrane transport	-
IP_peak_218	cluster1	1635560	1635921	362	1635701	42	2.66068	Intron (SK1T00039518-RA/SK1G00039518, intron 2 of 5)	cluster1	1634923	1637602	2680	6	+	SK1G00039518	SK1T00039518-RA	778	TPK1	EEC72096.1 hypothetical protein OsI_05056 [Oryza sativa Indica Group]	Metabolism;Metabolism	Global and overview maps;Metabolism of cofactors and vitamins	ko01100//Metabolic pathways;ko00730//Thiamine metabolism	K00949;K00949	-	GO:0004788//thiamine diphosphokinase activity;GO:0005524//ATP binding;GO:0030975//thiamine binding	GO:0006772//thiamine metabolic process;GO:0009229//thiamine diphosphate biosynthetic process	-
IP_peak_219	cluster1	1638689	1639116	428	1638998	36.5	2.36107	Exon (SK1T00039519-RA/SK1G00039519, exon 2 of 7)	cluster1	1638279	1641328	3050	7	+	SK1G00039519	SK1T00039519-RA	719	Taz	EEC72095.1 hypothetical protein OsI_05055 [Oryza sativa Indica Group]	Metabolism	Lipid metabolism	ko00564//Glycerophospholipid metabolism	K13511	-	GO:0016746//transferase activity, transferring acyl groups	GO:0031412//gas vesicle organization	-
IP_peak_220	cluster1	1654843	1655310	468	1655075	35.5	2.4201	Intron (SK1T00039523-RA/SK1G00039523, intron 7 of 12)	cluster1	1653037	1659006	5970	13	-	SK1G00039523	SK1T00039523-RA	3931	BGLU5	Q5JK35.1 RecName: Full=Beta-glucosidase 5; Short=Os1bglu5; Flags: Precursor [Oryza sativa Japonica Group]	Metabolism;Metabolism;Metabolism;Metabolism;Metabolism	Global and overview maps;Global and overview maps;Biosynthesis of other secondary metabolites;Carbohydrate metabolism;Metabolism of other amino acids	ko01100//Metabolic pathways;ko01110//Biosynthesis of secondary metabolites;ko00940//Phenylpropanoid biosynthesis;ko00500//Starch and sucrose metabolism;ko00460//Cyanoamino acid metabolism	K01188;K01188;K01188;K01188;K01188	GO:0009341//beta-galactosidase complex	GO:0004553//hydrolase activity, hydrolyzing O-glycosyl compounds;GO:0004565//beta-galactosidase activity	GO:0005975//carbohydrate metabolic process;GO:0006012//galactose metabolic process;GO:0071704//organic substance metabolic process	-
IP_peak_221	cluster1	1669826	1670301	476	1669972	46	2.86592	Downstream (1-2kb)	cluster1	1667005	1667703	699	1	+	SK1G00039524	SK1T00039524-RA	2967	--	EAY77087.1 hypothetical protein OsI_05048 [Oryza sativa Indica Group]	-	-	-	-	-	-	-	-
IP_peak_222	cluster1	1671635	1672253	619	1672010	39	2.37591	Exon (SK1T00039525-RA/SK1G00039525, exon 9 of 9)	cluster1	1671339	1675944	4606	9	-	SK1G00039525	SK1T00039525-RA	3934	HAK5	XP_015622303.1 potassium transporter 5 [Oryza sativa Japonica Group]	-	-	-	-	GO:0016020//membrane	GO:0015079//potassium ion transmembrane transporter activity	GO:0006813//potassium ion transport;GO:0071805//potassium ion transmembrane transport	-
IP_peak_223	cluster1	1674041	1674793	753	1674223	45	3.00115	Exon (SK1T00039525-RA/SK1G00039525, exon 5 of 9)	cluster1	1671339	1675944	4606	9	-	SK1G00039525	SK1T00039525-RA	1721	HAK5	XP_015622303.1 potassium transporter 5 [Oryza sativa Japonica Group]	-	-	-	-	GO:0016020//membrane	GO:0015079//potassium ion transmembrane transporter activity	GO:0006813//potassium ion transport;GO:0071805//potassium ion transmembrane transport	-
IP_peak_224	cluster1	1675040	1675469	430	1675272	37.5	2.71102	Exon (SK1T00039525-RA/SK1G00039525, exon 2 of 9)	cluster1	1671339	1675944	4606	9	-	SK1G00039525	SK1T00039525-RA	672	HAK5	XP_015622303.1 potassium transporter 5 [Oryza sativa Japonica Group]	-	-	-	-	GO:0016020//membrane	GO:0015079//potassium ion transmembrane transporter activity	GO:0006813//potassium ion transport;GO:0071805//potassium ion transmembrane transport	-
IP_peak_229	cluster1	1714993	1715442	450	1715260	36	2.05757	Promoter (1-2kb)	cluster1	1716796	1718709	1914	7	+	SK1G00039532	SK1T00039532-RA	-1536	ACR4	XP_015613429.1 serine/threonine-protein kinase-like protein ACR4 isoform X1 [Oryza sativa Japonica Group]	-	-	-	-	-	GO:0004672//protein kinase activity;GO:0005524//ATP binding	GO:0006468//protein phosphorylation	-
IP_peak_230	cluster1	1716163	1716683	521	1716291	40.5	2.65651	Promoter (<=1kb)	cluster1	1716796	1718709	1914	7	+	SK1G00039532	SK1T00039532-RA	-505	ACR4	XP_015613429.1 serine/threonine-protein kinase-like protein ACR4 isoform X1 [Oryza sativa Japonica Group]	-	-	-	-	-	GO:0004672//protein kinase activity;GO:0005524//ATP binding	GO:0006468//protein phosphorylation	-
IP_peak_231	cluster1	1721715	1722725	1011	1722480	48.5	2.93658	Promoter (1-2kb)	cluster1	1718830	1720552	1723	5	-	SK1G00039533	SK1T00039533-RA	-1928	PNSB5	XP_015613463.1 photosynthetic NDH subunit of subcomplex B 5, chloroplastic [Oryza sativa Japonica Group]	-	-	-	-	-	-	-	-
IP_peak_233	cluster1	1754394	1755120	727	1754655	33.5	2.29409	Promoter (<=1kb)	cluster1	1755358	1761680	6323	5	+	SK1G00000257	SK1T00000257-RA	-703	LAX2	XP_025878234.1 protein LAX PANICLE 2-like isoform X1 [Oryza sativa Japonica Group]	-	-	-	-	-	-	-	-
IP_peak_234	cluster1	1758137	1758677	541	1758487	41.5	2.71129	Intron (SK1T00000257-RA/SK1G00000257, intron 4 of 4)	cluster1	1755358	1761680	6323	5	+	SK1G00000257	SK1T00000257-RA	3129	LAX2	XP_025878234.1 protein LAX PANICLE 2-like isoform X1 [Oryza sativa Japonica Group]	-	-	-	-	-	-	-	-
IP_peak_236	cluster1	1773815	1774419	605	1774129	43	2.64098	Promoter (<=1kb)	cluster1	1775100	1788251	13152	20	+	SK1G00039539	SK1T00039539-RA	-971	SCD2	XP_015622187.1 coiled-coil domain-containing protein SCD2 [Oryza sativa Japonica Group]	-	-	-	-	-	GO:0005524//ATP binding	GO:0007059//chromosome segregation;GO:0030261//chromosome condensation	-
IP_peak_237	cluster1	1779366	1780477	1112	1779458	40	2.39737	Intron (SK1T00039539-RA/SK1G00039539, intron 10 of 19)	cluster1	1775100	1788251	13152	20	+	SK1G00039539	SK1T00039539-RA	4358	SCD2	XP_015622187.1 coiled-coil domain-containing protein SCD2 [Oryza sativa Japonica Group]	-	-	-	-	-	GO:0005524//ATP binding	GO:0007059//chromosome segregation;GO:0030261//chromosome condensation	-
IP_peak_239	cluster1	1798380	1798914	535	1798699	42.5	2.57451	Intron (SK1T00039541-RA/SK1G00039541, intron 4 of 12)	cluster1	1796979	1800959	3981	13	+	SK1G00039541	SK1T00039541-RA	1720	AK1	EEC72085.1 hypothetical protein OsI_05030 [Oryza sativa Indica Group]	Metabolism;Metabolism;Metabolism;Metabolism;Metabolism;Metabolism;Metabolism;Metabolism	Global and overview maps;Global and overview maps;Global and overview maps;Amino acid metabolism;Amino acid metabolism;Global and overview maps;Amino acid metabolism;Biosynthesis of other secondary metabolites	ko01100//Metabolic pathways;ko01110//Biosynthesis of secondary metabolites;ko01230//Biosynthesis of amino acids;ko00270//Cysteine and methionine metabolism;ko00260//Glycine, serine and threonine metabolism;ko01210//2-Oxocarboxylic acid metabolism;ko00300//Lysine biosynthesis;ko00261//Monobactam biosynthesis	K00928;K00928;K00928;K00928;K00928;K00928;K00928;K00928	-	GO:0004072//aspartate kinase activity;GO:0009040//ureidoglycolate dehydrogenase activity;GO:0033862//UMP kinase activity	GO:0009089//lysine biosynthetic process via diaminopimelate;GO:0015949//nucleobase-containing small molecule interconversion	-
IP_peak_240	cluster1	1799608	1800479	872	1799935	37	2.39295	Exon (SK1T00039541-RA/SK1G00039541, exon 10 of 13)	cluster1	1796979	1800959	3981	13	+	SK1G00039541	SK1T00039541-RA	2956	AK1	EEC72085.1 hypothetical protein OsI_05030 [Oryza sativa Indica Group]	Metabolism;Metabolism;Metabolism;Metabolism;Metabolism;Metabolism;Metabolism;Metabolism	Global and overview maps;Global and overview maps;Global and overview maps;Amino acid metabolism;Amino acid metabolism;Global and overview maps;Amino acid metabolism;Biosynthesis of other secondary metabolites	ko01100//Metabolic pathways;ko01110//Biosynthesis of secondary metabolites;ko01230//Biosynthesis of amino acids;ko00270//Cysteine and methionine metabolism;ko00260//Glycine, serine and threonine metabolism;ko01210//2-Oxocarboxylic acid metabolism;ko00300//Lysine biosynthesis;ko00261//Monobactam biosynthesis	K00928;K00928;K00928;K00928;K00928;K00928;K00928;K00928	-	GO:0004072//aspartate kinase activity;GO:0009040//ureidoglycolate dehydrogenase activity;GO:0033862//UMP kinase activity	GO:0009089//lysine biosynthetic process via diaminopimelate;GO:0015949//nucleobase-containing small molecule interconversion	-
IP_peak_241	cluster1	1802910	1803362	453	1802959	35	1.95343	Downstream (<1kb)	cluster1	1803921	1806706	2786	2	-	SK1G00039542	SK1T00039542-RA	3747	--	XP_025878232.1 uncharacterized protein LOC112937620 [Oryza sativa Japonica Group]	-	-	-	-	-	-	-	-
IP_peak_242	cluster1	1809258	1810505	1248	1809531	65	3.42459	3' UTR	cluster1	1803921	1806706	2786	2	-	SK1G00039542	SK1T00039542-RA	-2825	--	XP_025878232.1 uncharacterized protein LOC112937620 [Oryza sativa Japonica Group]	-	-	-	-	-	-	-	-
IP_peak_243	cluster1	1811538	1812538	1001	1812020	42.5	2.14994	Exon (SK1T00039543-RA/SK1G00039543, exon 11 of 17)	cluster1	1807245	1814662	7418	17	-	SK1G00039543	SK1T00039543-RA	2642	ARF4	EEC72083.1 hypothetical protein OsI_05027 [Oryza sativa Indica Group]	-	-	-	-	GO:0005634//nucleus	GO:0003677//DNA binding	GO:0006355//regulation of transcription, DNA-templated;GO:0009725//response to hormone	ARF
IP_peak_244	cluster1	1814941	1815767	827	1815084	90.5	5.19555	Promoter (<=1kb)	cluster1	1807245	1814662	7418	17	-	SK1G00039543	SK1T00039543-RA	-422	ARF4	EEC72083.1 hypothetical protein OsI_05027 [Oryza sativa Indica Group]	-	-	-	-	GO:0005634//nucleus	GO:0003677//DNA binding	GO:0006355//regulation of transcription, DNA-templated;GO:0009725//response to hormone	ARF
IP_peak_245	cluster1	1820953	1821598	646	1821186	55	3.00102	Promoter (<=1kb)	cluster1	1820664	1820840	177	1	-	SK1G00039545	SK1T00039545-RA	-346	--	BAT02652.1 Os07g0616100 [Oryza sativa Japonica Group]	-	-	-	-	-	-	-	-
IP_peak_246	cluster1	1836131	1837032	902	1836844	48	3.07104	Promoter (1-2kb)	cluster1	1838523	1841448	2926	3	+	SK1G00039548	SK1T00039548-RA	-1679	--	EEC72080.1 hypothetical protein OsI_05024 [Oryza sativa Indica Group]	-	-	-	-	GO:0005730//nucleolus;GO:0030686//90S preribosome;GO:0030688//preribosome, small subunit precursor	GO:0003824//catalytic activity;GO:0005507//copper ion binding;GO:0045340//mercury ion binding;GO:0046872//metal ion binding	GO:0000462//maturation of SSU-rRNA from tricistronic rRNA transcript (SSU-rRNA, 5.8S rRNA, LSU-rRNA);GO:0006400//tRNA modification;GO:0006825//copper ion transport;GO:0015694//mercury ion transport	-
IP_peak_247	cluster1	1837622	1838438	817	1838073	40.5	2.59531	Promoter (<=1kb)	cluster1	1838523	1841448	2926	3	+	SK1G00039548	SK1T00039548-RA	-450	--	EEC72080.1 hypothetical protein OsI_05024 [Oryza sativa Indica Group]	-	-	-	-	GO:0005730//nucleolus;GO:0030686//90S preribosome;GO:0030688//preribosome, small subunit precursor	GO:0003824//catalytic activity;GO:0005507//copper ion binding;GO:0045340//mercury ion binding;GO:0046872//metal ion binding	GO:0000462//maturation of SSU-rRNA from tricistronic rRNA transcript (SSU-rRNA, 5.8S rRNA, LSU-rRNA);GO:0006400//tRNA modification;GO:0006825//copper ion transport;GO:0015694//mercury ion transport	-
IP_peak_248	cluster1	1839514	1840013	500	1839578	41.5	2.04046	Intron (SK1T00039548-RA/SK1G00039548, intron 1 of 2)	cluster1	1838523	1841448	2926	3	+	SK1G00039548	SK1T00039548-RA	1055	--	EEC72080.1 hypothetical protein OsI_05024 [Oryza sativa Indica Group]	-	-	-	-	GO:0005730//nucleolus;GO:0030686//90S preribosome;GO:0030688//preribosome, small subunit precursor	GO:0003824//catalytic activity;GO:0005507//copper ion binding;GO:0045340//mercury ion binding;GO:0046872//metal ion binding	GO:0000462//maturation of SSU-rRNA from tricistronic rRNA transcript (SSU-rRNA, 5.8S rRNA, LSU-rRNA);GO:0006400//tRNA modification;GO:0006825//copper ion transport;GO:0015694//mercury ion transport	-
IP_peak_249	cluster1	1840262	1840917	656	1840446	35	2.35342	Intron (SK1T00039548-RA/SK1G00039548, intron 1 of 2)	cluster1	1838523	1841448	2926	3	+	SK1G00039548	SK1T00039548-RA	1923	--	EEC72080.1 hypothetical protein OsI_05024 [Oryza sativa Indica Group]	-	-	-	-	GO:0005730//nucleolus;GO:0030686//90S preribosome;GO:0030688//preribosome, small subunit precursor	GO:0003824//catalytic activity;GO:0005507//copper ion binding;GO:0045340//mercury ion binding;GO:0046872//metal ion binding	GO:0000462//maturation of SSU-rRNA from tricistronic rRNA transcript (SSU-rRNA, 5.8S rRNA, LSU-rRNA);GO:0006400//tRNA modification;GO:0006825//copper ion transport;GO:0015694//mercury ion transport	-
IP_peak_251	cluster1	1847625	1848085	461	1847815	35	2.16011	Intron (SK1T00039549-RA/SK1G00039549, intron 12 of 14)	cluster1	1845957	1856186	10230	15	-	SK1G00039549	SK1T00039549-RA	8371	SUVH4	XP_015629359.1 histone-lysine N-methyltransferase, H3 lysine-9 specific SUVH4 [Oryza sativa Japonica Group]	Metabolism;Metabolism	Global and overview maps;Amino acid metabolism	ko01100//Metabolic pathways;ko00310//Lysine degradation	K11420;K11420	GO:0005634//nucleus	GO:0005515//protein binding;GO:0008270//zinc ion binding;GO:0018024//histone-lysine N-methyltransferase activity	GO:0034968//histone lysine methylation	-
IP_peak_252	cluster1	1848970	1849728	759	1849522	42.5	2.27153	Intron (SK1T00039549-RA/SK1G00039549, intron 11 of 14)	cluster1	1845957	1856186	10230	15	-	SK1G00039549	SK1T00039549-RA	6664	SUVH4	XP_015629359.1 histone-lysine N-methyltransferase, H3 lysine-9 specific SUVH4 [Oryza sativa Japonica Group]	Metabolism;Metabolism	Global and overview maps;Amino acid metabolism	ko01100//Metabolic pathways;ko00310//Lysine degradation	K11420;K11420	GO:0005634//nucleus	GO:0005515//protein binding;GO:0008270//zinc ion binding;GO:0018024//histone-lysine N-methyltransferase activity	GO:0034968//histone lysine methylation	-
IP_peak_253	cluster1	1854102	1854426	325	1854237	41	2.30052	Intron (SK1T00039549-RA/SK1G00039549, intron 4 of 14)	cluster1	1845957	1856186	10230	15	-	SK1G00039549	SK1T00039549-RA	1949	SUVH4	XP_015629359.1 histone-lysine N-methyltransferase, H3 lysine-9 specific SUVH4 [Oryza sativa Japonica Group]	Metabolism;Metabolism	Global and overview maps;Amino acid metabolism	ko01100//Metabolic pathways;ko00310//Lysine degradation	K11420;K11420	GO:0005634//nucleus	GO:0005515//protein binding;GO:0008270//zinc ion binding;GO:0018024//histone-lysine N-methyltransferase activity	GO:0034968//histone lysine methylation	-
IP_peak_254	cluster1	1854781	1855081	301	1854885	30	2.17052	Intron (SK1T00039549-RA/SK1G00039549, intron 2 of 14)	cluster1	1845957	1856186	10230	15	-	SK1G00039549	SK1T00039549-RA	1301	SUVH4	XP_015629359.1 histone-lysine N-methyltransferase, H3 lysine-9 specific SUVH4 [Oryza sativa Japonica Group]	Metabolism;Metabolism	Global and overview maps;Amino acid metabolism	ko01100//Metabolic pathways;ko00310//Lysine degradation	K11420;K11420	GO:0005634//nucleus	GO:0005515//protein binding;GO:0008270//zinc ion binding;GO:0018024//histone-lysine N-methyltransferase activity	GO:0034968//histone lysine methylation	-
IP_peak_255	cluster1	1857163	1858140	978	1857519	34.5	2.29041	Promoter (1-2kb)	cluster1	1845957	1856186	10230	15	-	SK1G00039549	SK1T00039549-RA	-1333	SUVH4	XP_015629359.1 histone-lysine N-methyltransferase, H3 lysine-9 specific SUVH4 [Oryza sativa Japonica Group]	Metabolism;Metabolism	Global and overview maps;Amino acid metabolism	ko01100//Metabolic pathways;ko00310//Lysine degradation	K11420;K11420	GO:0005634//nucleus	GO:0005515//protein binding;GO:0008270//zinc ion binding;GO:0018024//histone-lysine N-methyltransferase activity	GO:0034968//histone lysine methylation	-
IP_peak_256	cluster1	1858894	1859195	302	1859050	33	2.42325	Downstream (2-3kb)	cluster1	1845957	1856186	10230	15	-	SK1G00039549	SK1T00039549-RA	-2864	SUVH4	XP_015629359.1 histone-lysine N-methyltransferase, H3 lysine-9 specific SUVH4 [Oryza sativa Japonica Group]	Metabolism;Metabolism	Global and overview maps;Amino acid metabolism	ko01100//Metabolic pathways;ko00310//Lysine degradation	K11420;K11420	GO:0005634//nucleus	GO:0005515//protein binding;GO:0008270//zinc ion binding;GO:0018024//histone-lysine N-methyltransferase activity	GO:0034968//histone lysine methylation	-
IP_peak_257	cluster1	1873284	1873791	508	1873683	40.5	1.80758	Promoter (<=1kb)	cluster1	1873701	1883866	10166	8	+	SK1G00039551	SK1T00039551-RA	-18	Os01g0926700	PWZ18644.1 putative glucuronosyltransferase [Zea mays]	-	-	-	-	-	-	-	-
IP_peak_260	cluster1	1898676	1899537	862	1898810	37.5	2.02219	3' UTR	cluster1	1896175	1899022	2848	6	+	SK1G00039553	SK1T00039553-RA	2635	tal	XP_015617463.1 uncharacterized protein LOC4327239 [Oryza sativa Japonica Group]	Metabolism;Metabolism;Metabolism;Metabolism;Metabolism	Global and overview maps;Global and overview maps;Global and overview maps;Global and overview maps;Carbohydrate metabolism	ko01100//Metabolic pathways;ko01110//Biosynthesis of secondary metabolites;ko01200//Carbon metabolism;ko01230//Biosynthesis of amino acids;ko00030//Pentose phosphate pathway	K00616;K00616;K00616;K00616;K00616	-	GO:0004801//sedoheptulose-7-phosphate:D-glyceraldehyde-3-phosphate glyceronetransferase activity;GO:0016832//aldehyde-lyase activity	GO:0005975//carbohydrate metabolic process;GO:0006098//pentose-phosphate shunt	-
IP_peak_262	cluster1	1910849	1911568	720	1911030	53.5	2.58175	Intron (SK1T00039555-RA/SK1G00039555, intron 2 of 4)	cluster1	1910141	1912868	2728	5	+	SK1G00039555	SK1T00039555-RA	889	UBC27	XP_015618841.1 ubiquitin-conjugating enzyme E2 27 [Oryza sativa Japonica Group]	Genetic Information Processing	Folding, sorting and degradation	ko04120//Ubiquitin mediated proteolysis	K04649	-	GO:0003690//double-stranded DNA binding;GO:0005515//protein binding	GO:0006355//regulation of transcription, DNA-templated	-
IP_peak_264	cluster1	1916701	1917554	854	1916770	37.5	2.30586	Promoter (1-2kb)	cluster1	1917778	1923514	5737	7	+	SK1G00039556	SK1T00039556-RA	-1008	At1g54610	XP_015618815.1 probable serine/threonine-protein kinase At1g54610 [Oryza sativa Japonica Group]	-	-	-	-	-	GO:0004672//protein kinase activity;GO:0005524//ATP binding;GO:0016709//oxidoreductase activity, acting on paired donors, with incorporation or reduction of molecular oxygen, NAD(P)H as one donor, and incorporation of one atom of oxygen	GO:0006468//protein phosphorylation;GO:0006744//ubiquinone biosynthetic process	-
IP_peak_265	cluster1	1920415	1921630	1216	1920832	43.5	2.60033	Intron (SK1T00039556-RA/SK1G00039556, intron 2 of 6)	cluster1	1917778	1923514	5737	7	+	SK1G00039556	SK1T00039556-RA	3054	At1g54610	XP_015618815.1 probable serine/threonine-protein kinase At1g54610 [Oryza sativa Japonica Group]	-	-	-	-	-	GO:0004672//protein kinase activity;GO:0005524//ATP binding;GO:0016709//oxidoreductase activity, acting on paired donors, with incorporation or reduction of molecular oxygen, NAD(P)H as one donor, and incorporation of one atom of oxygen	GO:0006468//protein phosphorylation;GO:0006744//ubiquinone biosynthetic process	-
IP_peak_266	cluster1	1926269	1926724	456	1926557	32	1.90193	Promoter (1-2kb)	cluster1	1923903	1924615	713	2	-	SK1G00039557	SK1T00039557-RA	-1942	--	EEC72070.1 hypothetical protein OsI_05003 [Oryza sativa Indica Group]	-	-	-	-	-	-	-	-
IP_peak_269	cluster1	1931317	1931673	357	1931425	36.5	1.89329	Downstream (2-3kb)	cluster1	1934017	1934796	780	1	-	SK1G00039558	SK1T00039558-RA	3371	NAC083	BAB89659.1 P0482D04.6 [Oryza sativa Japonica Group]	-	-	-	-	-	GO:0003677//DNA binding	GO:0006355//regulation of transcription, DNA-templated	NAC
IP_peak_270	cluster1	1932253	1932640	388	1932453	105	5.77732	Downstream (1-2kb)	cluster1	1934017	1934796	780	1	-	SK1G00039558	SK1T00039558-RA	2343	NAC083	BAB89659.1 P0482D04.6 [Oryza sativa Japonica Group]	-	-	-	-	-	GO:0003677//DNA binding	GO:0006355//regulation of transcription, DNA-templated	NAC
IP_peak_271	cluster1	1932913	1933811	899	1933369	46.5	2.80711	Downstream (<1kb)	cluster1	1934017	1934796	780	1	-	SK1G00039558	SK1T00039558-RA	1427	NAC083	BAB89659.1 P0482D04.6 [Oryza sativa Japonica Group]	-	-	-	-	-	GO:0003677//DNA binding	GO:0006355//regulation of transcription, DNA-templated	NAC
IP_peak_272	cluster1	1938922	1939184	263	1939005	34.5	2.34705	Exon (SK1T00039559-RA/SK1G00039559, exon 2 of 5)	cluster1	1938014	1940995	2982	5	+	SK1G00039559	SK1T00039559-RA	991	PAT07	EEC72069.1 hypothetical protein OsI_05001 [Oryza sativa Indica Group]	-	-	-	-	-	GO:0016409//palmitoyltransferase activity	-	-
IP_peak_273	cluster1	1941286	1941940	655	1941464	35.5	1.84281	Downstream (<1kb)	cluster1	1941793	1943709	1917	2	-	SK1G00039560	SK1T00039560-RA	2245	DCI1	KAB8084992.1 hypothetical protein EE612_007688, partial [Oryza sativa]	Cellular Processes	Transport and catabolism	ko04146//Peroxisome	K12663	GO:0016507//mitochondrial fatty acid beta-oxidation multienzyme complex	GO:0003824//catalytic activity;GO:0003857//3-hydroxyacyl-CoA dehydrogenase activity;GO:0003860//3-hydroxyisobutyryl-CoA hydrolase activity;GO:0004165//dodecenoyl-CoA delta-isomerase activity;GO:0004300//enoyl-CoA hydratase activity;GO:0008692//3-hydroxybutyryl-CoA epimerase activity;GO:0008935//1,4-dihydroxy-2-naphthoyl-CoA synthase activity;GO:0016787//hydrolase activity;GO:0016830//carbon-carbo…	GO:0006635//fatty acid beta-oxidation;GO:0009062//fatty acid catabolic process;GO:0009234//menaquinone biosynthetic process;GO:0010124//phenylacetate catabolic process;GO:0010128//benzoate catabolic process via CoA ligation;GO:0019439//aromatic compound catabolic process	-
IP_peak_274	cluster1	1944406	1944735	330	1944569	35	2.55844	Promoter (<=1kb)	cluster1	1945229	1945483	255	1	+	SK1G00039561	SK1T00039561-RA	-660	--	BAS77373.1 Os02g0188201 [Oryza sativa Japonica Group]	-	-	-	-	-	-	-	-
IP_peak_275	cluster1	1948200	1948541	342	1948351	29.5	2.03289	Intron (SK1T00039562-RA/SK1G00039562, intron 1 of 8)	cluster1	1946011	1965402	19392	9	+	SK1G00039562	SK1T00039562-RA	2340	RPP13	EEC72068.1 hypothetical protein OsI_04999 [Oryza sativa Indica Group]	-	-	-	-	-	GO:0043531//ADP binding	-	-
IP_peak_276	cluster1	1954733	1955374	642	1954883	44.5	2.49966	Intron (SK1T00039562-RA/SK1G00039562, intron 4 of 8)	cluster1	1946011	1965402	19392	9	+	SK1G00039562	SK1T00039562-RA	8872	RPP13	EEC72068.1 hypothetical protein OsI_04999 [Oryza sativa Indica Group]	-	-	-	-	-	GO:0043531//ADP binding	-	-
IP_peak_277	cluster1	1961805	1962193	389	1962073	38.5	2.38216	Intron (SK1T00039562-RA/SK1G00039562, intron 4 of 8)	cluster1	1946011	1965402	19392	9	+	SK1G00039562	SK1T00039562-RA	16062	RPP13	EEC72068.1 hypothetical protein OsI_04999 [Oryza sativa Indica Group]	-	-	-	-	-	GO:0043531//ADP binding	-	-
IP_peak_278	cluster1	1963571	1964245	675	1963898	33.5	2.22458	Exon (SK1T00039562-RA/SK1G00039562, exon 7 of 9)	cluster1	1946011	1965402	19392	9	+	SK1G00039562	SK1T00039562-RA	17887	RPP13	EEC72068.1 hypothetical protein OsI_04999 [Oryza sativa Indica Group]	-	-	-	-	-	GO:0043531//ADP binding	-	-
IP_peak_280	cluster1	1974003	1974620	618	1974394	36	2.25981	Downstream (2-3kb)	cluster1	1976611	1977141	531	1	+	SK1G00039564	SK1T00039564-RA	-2217	--	EAY77041.1 hypothetical protein OsI_04997 [Oryza sativa Indica Group]	Environmental Information Processing	Signal transduction	ko04075//Plant hormone signal transduction	K14488	-	-	GO:0009733//response to auxin	-
IP_peak_281	cluster1	1975523	1976335	813	1976065	33.5	2.72282	Promoter (<=1kb)	cluster1	1976611	1977141	531	1	+	SK1G00039564	SK1T00039564-RA	-546	--	EAY77041.1 hypothetical protein OsI_04997 [Oryza sativa Indica Group]	Environmental Information Processing	Signal transduction	ko04075//Plant hormone signal transduction	K14488	-	-	GO:0009733//response to auxin	-
IP_peak_282	cluster1	2002265	2003112	848	2002506	37	2.47007	Downstream (<1kb)	cluster1	2003418	2012862	9445	14	-	SK1G00039565	SK1T00039565-RA	10356	HHT1	KAF0925510.1 hypothetical protein E2562_016701 [Oryza meyeriana var. granulata] [Oryza meyeriana]	Metabolism	Lipid metabolism	ko00073//Cutin, suberine and wax biosynthesis	K15400	-	GO:0016747//transferase activity, transferring acyl groups other than amino-acyl groups	-	-
IP_peak_283	cluster1	2006089	2007368	1280	2006642	38	2.68576	Intron (SK1T00039565-RA/SK1G00039565, intron 11 of 13)	cluster1	2003418	2012862	9445	14	-	SK1G00039565	SK1T00039565-RA	6220	HHT1	KAF0925510.1 hypothetical protein E2562_016701 [Oryza meyeriana var. granulata] [Oryza meyeriana]	Metabolism	Lipid metabolism	ko00073//Cutin, suberine and wax biosynthesis	K15400	-	GO:0016747//transferase activity, transferring acyl groups other than amino-acyl groups	-	-
IP_peak_284	cluster1	2007898	2008385	488	2008161	35	2.6688	Exon (SK1T00039565-RA/SK1G00039565, exon 8 of 14)	cluster1	2003418	2012862	9445	14	-	SK1G00039565	SK1T00039565-RA	4701	HHT1	KAF0925510.1 hypothetical protein E2562_016701 [Oryza meyeriana var. granulata] [Oryza meyeriana]	Metabolism	Lipid metabolism	ko00073//Cutin, suberine and wax biosynthesis	K15400	-	GO:0016747//transferase activity, transferring acyl groups other than amino-acyl groups	-	-
IP_peak_285	cluster1	2011634	2012057	424	2011930	39	2.58807	Intron (SK1T00039565-RA/SK1G00039565, intron 2 of 13)	cluster1	2003418	2012862	9445	14	-	SK1G00039565	SK1T00039565-RA	932	HHT1	KAF0925510.1 hypothetical protein E2562_016701 [Oryza meyeriana var. granulata] [Oryza meyeriana]	Metabolism	Lipid metabolism	ko00073//Cutin, suberine and wax biosynthesis	K15400	-	GO:0016747//transferase activity, transferring acyl groups other than amino-acyl groups	-	-
IP_peak_286	cluster1	2015180	2015548	369	2015395	35	2.38736	Promoter (<=1kb)	cluster1	2015714	2017889	2176	6	+	SK1G00039566	SK1T00039566-RA	-319	RPL7A-1	EAY77039.1 hypothetical protein OsI_04994 [Oryza sativa Indica Group]	Genetic Information Processing	Translation	ko03010//Ribosome	K02936	GO:0016021//integral component of membrane	-	-	-
IP_peak_287	cluster1	2023015	2023318	304	2023116	41	2.68785	Promoter (1-2kb)	cluster1	2024206	2030556	6351	9	+	SK1G00039568	SK1T00039568-RA	-1090	EXA1	KAF2954066.1 hypothetical protein DAI22_01g453500 [Oryza sativa Japonica Group]	-	-	-	-	-	GO:0005515//protein binding	-	-
IP_peak_288	cluster1	2034359	2034740	382	2034453	43	2.48614	3' UTR	cluster1	2030420	2036384	5965	2	-	SK1G00039569	SK1T00039569-RA	1931	TCP20	EEC72064.1 hypothetical protein OsI_04991 [Oryza sativa Indica Group]	-	-	-	-	-	-	-	TCP
IP_peak_289	cluster1	2048994	2050434	1441	2050093	51	2.46178	Intron (SK1T00039570-RA/SK1G00039570, intron 14 of 15)	cluster1	2045999	2050314	4316	16	+	SK1G00039570	SK1T00039570-RA	4094	SPBC1711.16	XP_015645860.1 uncharacterized WD repeat-containing protein C17D11.16 [Oryza sativa Japonica Group]	-	-	-	-	-	GO:0005515//protein binding	-	-
IP_peak_290	cluster1	2050910	2051576	667	2051081	46	2.73467	Downstream (1-2kb)	cluster1	2052877	2053443	567	1	-	SK1G00039571	SK1T00039571-RA	2362	--	EAY77034.1 hypothetical protein OsI_04989 [Oryza sativa Indica Group]	-	-	-	-	GO:0005634//nucleus	GO:0008270//zinc ion binding	-	-
IP_peak_291	cluster1	2052588	2052988	401	2052727	42	2.58135	Downstream (<1kb)	cluster1	2052877	2053443	567	1	-	SK1G00039571	SK1T00039571-RA	716	--	EAY77034.1 hypothetical protein OsI_04989 [Oryza sativa Indica Group]	-	-	-	-	GO:0005634//nucleus	GO:0008270//zinc ion binding	-	-
IP_peak_292	cluster1	2062162	2062971	810	2062252	39	2.26936	Promoter (1-2kb)	cluster1	2060396	2060617	222	1	-	SK1G00039573	SK1T00039573-RA	-1635	--	BAS75967.1 Os01g0923950 [Oryza sativa Japonica Group]	-	-	-	-	-	-	-	-
IP_peak_293	cluster1	2067442	2068022	581	2067604	39	2.41582	Intron (SK1T00039574-RA/SK1G00039574, intron 1 of 1)	cluster1	2067298	2070184	2887	2	+	SK1G00039574	SK1T00039574-RA	306	FBX6	XP_015622240.1 F-box only protein 6 [Oryza sativa Japonica Group]	-	-	-	-	-	GO:0005515//protein binding	-	-
IP_peak_294	cluster1	2072298	2072937	640	2072435	44	2.1817	Exon (SK1T00039575-RA/SK1G00039575, exon 1 of 1)	cluster1	2071538	2073772	2235	1	-	SK1G00039575	SK1T00039575-RA	1337	pi041	EAY77031.1 hypothetical protein OsI_04986 [Oryza sativa Indica Group]	-	-	-	-	-	GO:0005515//protein binding	GO:0006457//protein folding;GO:0009408//response to heat	-
IP_peak_295	cluster1	2074345	2074831	487	2074644	39.5	2.55907	Promoter (<=1kb)	cluster1	2071538	2073772	2235	1	-	SK1G00039575	SK1T00039575-RA	-872	pi041	EAY77031.1 hypothetical protein OsI_04986 [Oryza sativa Indica Group]	-	-	-	-	-	GO:0005515//protein binding	GO:0006457//protein folding;GO:0009408//response to heat	-
IP_peak_298	cluster1	2125535	2125908	374	2125760	32.5	2.51517	Exon (SK1T00039579-RA/SK1G00039579, exon 11 of 14)	cluster1	2124703	2128667	3965	14	-	SK1G00039579	SK1T00039579-RA	2907	CBSCBSPB1	XP_015640062.1 CBS domain-containing protein CBSCBSPB1 [Oryza sativa Japonica Group]	-	-	-	-	-	GO:0003938//IMP dehydrogenase activity;GO:0004122//cystathionine beta-synthase activity;GO:0005515//protein binding;GO:0016853//isomerase activity	GO:0005975//carbohydrate metabolic process;GO:0009152//purine ribonucleotide biosynthetic process;GO:0019344//cysteine biosynthetic process	-
IP_peak_299	cluster1	2133617	2133878	262	2133728	38.5	2.44854	Downstream (<1kb)	cluster1	2133881	2134108	228	1	-	SK1G00039580	SK1T00039580-RA	380	--	XP_015627748.1 uncharacterized protein LOC4327249 [Oryza sativa Japonica Group]	-	-	-	-	GO:0005783//endoplasmic reticulum	-	-	-
IP_peak_300	cluster1	2152141	2152999	859	2152764	43.5	3.00597	Downstream (<1kb)	cluster1	2152805	2162092	9288	6	-	SK1G00039583	SK1T00039583-RA	9328	MADS51	ABF84007.1 MADS-box protein 84 [Oryza sativa Indica Group]	-	-	-	-	-	GO:0003677//DNA binding;GO:0046983//protein dimerization activity	-	M-type
IP_peak_301	cluster1	2156970	2157437	468	2157313	41	2.33575	Intron (SK1T00039583-RA/SK1G00039583, intron 1 of 5)	cluster1	2152805	2162092	9288	6	-	SK1G00039583	SK1T00039583-RA	4779	MADS51	ABF84007.1 MADS-box protein 84 [Oryza sativa Indica Group]	-	-	-	-	-	GO:0003677//DNA binding;GO:0046983//protein dimerization activity	-	M-type
IP_peak_302	cluster1	2159634	2160095	462	2159901	37.5	2.3566	Intron (SK1T00039583-RA/SK1G00039583, intron 1 of 5)	cluster1	2152805	2162092	9288	6	-	SK1G00039583	SK1T00039583-RA	2191	MADS51	ABF84007.1 MADS-box protein 84 [Oryza sativa Indica Group]	-	-	-	-	-	GO:0003677//DNA binding;GO:0046983//protein dimerization activity	-	M-type
IP_peak_309	cluster1	2260906	2261485	580	2261297	38.5	2.26376	3' UTR	cluster1	2261250	2265141	3892	6	-	SK1G00039592	SK1T00039592-RA	3844	TOM20	A2WYG9.2 RecName: Full=Probable mitochondrial import receptor subunit TOM20; AltName: Full=Translocase of outer membrane 20 kDa subunit [Oryza sativa Indica Group]	-	-	-	-	-	GO:0005515//protein binding	-	-
IP_peak_310	cluster1	2267046	2267546	501	2267125	39	2.2328	Downstream (1-2kb)	cluster1	2265479	2267075	1597	2	+	SK1G00039593	SK1T00039593-RA	1646	KING1	XP_015616061.1 SNF1-related protein kinase regulatory subunit gamma-1 [Oryza sativa Japonica Group]	-	-	-	-	GO:0009898//cytoplasmic side of plasma membrane;GO:0043190//ATP-binding cassette (ABC) transporter complex	GO:0003938//IMP dehydrogenase activity;GO:0004122//cystathionine beta-synthase activity;GO:0004133//glycogen debranching enzyme activity;GO:0005524//ATP binding;GO:0015095//magnesium ion transmembrane transporter activity;GO:0016853//isomerase activity;GO:0031263//amine-transporting ATPase activity	GO:0005975//carbohydrate metabolic process;GO:0005980//glycogen catabolic process;GO:0009152//purine ribonucleotide biosynthetic process;GO:0015693//magnesium ion transport;GO:0015837//amine transport;GO:0019344//cysteine biosynthetic process	-
IP_peak_311	cluster1	2272708	2273221	514	2272970	42.5	2.00277	Downstream (<1kb)	cluster1	2268733	2270682	1950	1	-	SK1G00039594	SK1T00039594-RA	-2288	EXO70B1	KAB8084948.1 hypothetical protein EE612_007621 [Oryza sativa]	-	-	-	-	GO:0000145//exocyst	-	GO:0006887//exocytosis	-
IP_peak_312	cluster1	2273501	2274056	556	2273911	35.5	2.22295	Intron (SK1T00039595-RA/SK1G00039595, intron 25 of 27)	cluster1	2273177	2284996	11820	28	-	SK1G00039595	SK1T00039595-RA	11085	GCS1	XP_015690781.1 PREDICTED: LOW QUALITY PROTEIN: alpha-glucosidase 2-like [Oryza brachyantha]	Metabolism;Genetic Information Processing;Metabolism	Global and overview maps;Folding, sorting and degradation;Glycan biosynthesis and metabolism	ko01100//Metabolic pathways;ko04141//Protein processing in endoplasmic reticulum;ko00510//N-Glycan biosynthesis	K01228;K01228;K01228	-	GO:0004555//alpha,alpha-trehalase activity	GO:0005991//trehalose metabolic process	-
IP_peak_313	cluster1	2277807	2279056	1250	2278722	43.5	2.65212	Intron (SK1T00039595-RA/SK1G00039595, intron 16 of 27)	cluster1	2273177	2284996	11820	28	-	SK1G00039595	SK1T00039595-RA	6274	GCS1	XP_015690781.1 PREDICTED: LOW QUALITY PROTEIN: alpha-glucosidase 2-like [Oryza brachyantha]	Metabolism;Genetic Information Processing;Metabolism	Global and overview maps;Folding, sorting and degradation;Glycan biosynthesis and metabolism	ko01100//Metabolic pathways;ko04141//Protein processing in endoplasmic reticulum;ko00510//N-Glycan biosynthesis	K01228;K01228;K01228	-	GO:0004555//alpha,alpha-trehalase activity	GO:0005991//trehalose metabolic process	-
IP_peak_314	cluster1	2280955	2281455	501	2281297	38	2.41634	Intron (SK1T00039595-RA/SK1G00039595, intron 10 of 27)	cluster1	2273177	2284996	11820	28	-	SK1G00039595	SK1T00039595-RA	3699	GCS1	XP_015690781.1 PREDICTED: LOW QUALITY PROTEIN: alpha-glucosidase 2-like [Oryza brachyantha]	Metabolism;Genetic Information Processing;Metabolism	Global and overview maps;Folding, sorting and degradation;Glycan biosynthesis and metabolism	ko01100//Metabolic pathways;ko04141//Protein processing in endoplasmic reticulum;ko00510//N-Glycan biosynthesis	K01228;K01228;K01228	-	GO:0004555//alpha,alpha-trehalase activity	GO:0005991//trehalose metabolic process	-
IP_peak_315	cluster1	2282031	2282882	852	2282763	38	2.20549	Exon (SK1T00039595-RA/SK1G00039595, exon 6 of 28)	cluster1	2273177	2284996	11820	28	-	SK1G00039595	SK1T00039595-RA	2233	GCS1	XP_015690781.1 PREDICTED: LOW QUALITY PROTEIN: alpha-glucosidase 2-like [Oryza brachyantha]	Metabolism;Genetic Information Processing;Metabolism	Global and overview maps;Folding, sorting and degradation;Glycan biosynthesis and metabolism	ko01100//Metabolic pathways;ko04141//Protein processing in endoplasmic reticulum;ko00510//N-Glycan biosynthesis	K01228;K01228;K01228	-	GO:0004555//alpha,alpha-trehalase activity	GO:0005991//trehalose metabolic process	-
IP_peak_316	cluster1	2283154	2284293	1140	2283782	34	2.38421	Intron (SK1T00039595-RA/SK1G00039595, intron 2 of 27)	cluster1	2273177	2284996	11820	28	-	SK1G00039595	SK1T00039595-RA	1214	GCS1	XP_015690781.1 PREDICTED: LOW QUALITY PROTEIN: alpha-glucosidase 2-like [Oryza brachyantha]	Metabolism;Genetic Information Processing;Metabolism	Global and overview maps;Folding, sorting and degradation;Glycan biosynthesis and metabolism	ko01100//Metabolic pathways;ko04141//Protein processing in endoplasmic reticulum;ko00510//N-Glycan biosynthesis	K01228;K01228;K01228	-	GO:0004555//alpha,alpha-trehalase activity	GO:0005991//trehalose metabolic process	-
IP_peak_317	cluster1	2306920	2307408	489	2307065	39	2.50549	Intron (SK1T00039597-RB/SK1G00039597, intron 5 of 8)	cluster1	2299032	2312177	13146	9	-	SK1G00039597	SK1T00039597-RB	5112	At4g15970	TVU36023.1 hypothetical protein EJB05_17933, partial [Eragrostis curvula]	-	-	-	-	-	GO:0003824//catalytic activity;GO:0005516//calmodulin binding	GO:0008616//queuosine biosynthetic process	-
IP_peak_318	cluster1	2312272	2312678	407	2312465	51	3.37959	Promoter (<=1kb)	cluster1	2299032	2312177	13146	9	-	SK1G00039597	SK1T00039597-RB	-288	At4g15970	TVU36023.1 hypothetical protein EJB05_17933, partial [Eragrostis curvula]	-	-	-	-	-	GO:0003824//catalytic activity;GO:0005516//calmodulin binding	GO:0008616//queuosine biosynthetic process	-
IP_peak_319	cluster1	2317488	2317929	442	2317681	50	3.00389	Exon (SK1T00039598-RA/SK1G00039598, exon 16 of 20)	cluster1	2311537	2319990	8454	20	+	SK1G00039598	SK1T00039598-RA	6144	DRP3A	KAB8084938.1 hypothetical protein EE612_007606 [Oryza sativa]	-	-	-	-	GO:0005737//cytoplasm	GO:0003924//GTPase activity;GO:0005525//GTP binding;GO:0043022//ribosome binding	GO:0042254//ribosome biogenesis	-
IP_peak_320	cluster1	2318576	2319086	511	2318753	41	2.60168	Intron (SK1T00039598-RA/SK1G00039598, intron 17 of 19)	cluster1	2311537	2319990	8454	20	+	SK1G00039598	SK1T00039598-RA	7216	DRP3A	KAB8084938.1 hypothetical protein EE612_007606 [Oryza sativa]	-	-	-	-	GO:0005737//cytoplasm	GO:0003924//GTPase activity;GO:0005525//GTP binding;GO:0043022//ribosome binding	GO:0042254//ribosome biogenesis	-
IP_peak_321	cluster1	2321313	2321836	524	2321532	43.5	2.67584	Intron (SK1T00039599-RA/SK1G00039599, intron 14 of 15)	cluster1	2320014	2327084	7071	16	-	SK1G00039599	SK1T00039599-RA	5552	pc1998	XP_015614269.1 uncharacterized protein LOC4327742 isoform X2 [Oryza sativa Japonica Group]	-	-	-	-	-	GO:0008168//methyltransferase activity;GO:0008173//RNA methyltransferase activity;GO:0008276//protein methyltransferase activity;GO:0008649//rRNA methyltransferase activity;GO:0008757//S-adenosylmethionine-dependent methyltransferase activity;GO:0052913//16S rRNA (guanine(966)-N(2))-methyltransferase activity	GO:0000154//rRNA modification;GO:0006396//RNA processing;GO:0006400//tRNA modification;GO:0006412//translation;GO:0018364//peptidyl-glutamine methylation;GO:0031167//rRNA methylation	-
IP_peak_322	cluster1	2322360	2323085	726	2322786	35	2.19294	Intron (SK1T00039599-RA/SK1G00039599, intron 11 of 15)	cluster1	2320014	2327084	7071	16	-	SK1G00039599	SK1T00039599-RA	4298	pc1998	XP_015614269.1 uncharacterized protein LOC4327742 isoform X2 [Oryza sativa Japonica Group]	-	-	-	-	-	GO:0008168//methyltransferase activity;GO:0008173//RNA methyltransferase activity;GO:0008276//protein methyltransferase activity;GO:0008649//rRNA methyltransferase activity;GO:0008757//S-adenosylmethionine-dependent methyltransferase activity;GO:0052913//16S rRNA (guanine(966)-N(2))-methyltransferase activity	GO:0000154//rRNA modification;GO:0006396//RNA processing;GO:0006400//tRNA modification;GO:0006412//translation;GO:0018364//peptidyl-glutamine methylation;GO:0031167//rRNA methylation	-
IP_peak_323	cluster1	2323361	2324313	953	2323807	52	3.10575	Exon (SK1T00039599-RA/SK1G00039599, exon 10 of 16)	cluster1	2320014	2327084	7071	16	-	SK1G00039599	SK1T00039599-RA	3277	pc1998	XP_015614269.1 uncharacterized protein LOC4327742 isoform X2 [Oryza sativa Japonica Group]	-	-	-	-	-	GO:0008168//methyltransferase activity;GO:0008173//RNA methyltransferase activity;GO:0008276//protein methyltransferase activity;GO:0008649//rRNA methyltransferase activity;GO:0008757//S-adenosylmethionine-dependent methyltransferase activity;GO:0052913//16S rRNA (guanine(966)-N(2))-methyltransferase activity	GO:0000154//rRNA modification;GO:0006396//RNA processing;GO:0006400//tRNA modification;GO:0006412//translation;GO:0018364//peptidyl-glutamine methylation;GO:0031167//rRNA methylation	-
IP_peak_324	cluster1	2325128	2325540	413	2325434	44.5	2.69789	Exon (SK1T00039599-RA/SK1G00039599, exon 5 of 16)	cluster1	2320014	2327084	7071	16	-	SK1G00039599	SK1T00039599-RA	1650	pc1998	XP_015614269.1 uncharacterized protein LOC4327742 isoform X2 [Oryza sativa Japonica Group]	-	-	-	-	-	GO:0008168//methyltransferase activity;GO:0008173//RNA methyltransferase activity;GO:0008276//protein methyltransferase activity;GO:0008649//rRNA methyltransferase activity;GO:0008757//S-adenosylmethionine-dependent methyltransferase activity;GO:0052913//16S rRNA (guanine(966)-N(2))-methyltransferase activity	GO:0000154//rRNA modification;GO:0006396//RNA processing;GO:0006400//tRNA modification;GO:0006412//translation;GO:0018364//peptidyl-glutamine methylation;GO:0031167//rRNA methylation	-
IP_peak_325	cluster1	2346408	2347144	737	2346754	36.5	1.96984	Intron (SK1T00039602-RA/SK1G00039602, intron 1 of 1)	cluster1	2345617	2349300	3684	2	+	SK1G00039602	SK1T00039602-RA	1137	CBSX6	EAY77001.1 hypothetical protein OsI_04957 [Oryza sativa Indica Group]	-	-	-	-	-	-	-	-
IP_peak_326	cluster1	2347444	2348075	632	2347594	40.5	2.64983	Intron (SK1T00039602-RA/SK1G00039602, intron 1 of 1)	cluster1	2345617	2349300	3684	2	+	SK1G00039602	SK1T00039602-RA	1977	CBSX6	EAY77001.1 hypothetical protein OsI_04957 [Oryza sativa Indica Group]	-	-	-	-	-	-	-	-
IP_peak_327	cluster1	2354117	2354931	815	2354415	38.5	2.59037	Exon (SK1T00039603-RA/SK1G00039603, exon 2 of 3)	cluster1	2351890	2356272	4383	3	+	SK1G00039603	SK1T00039603-RA	2525	SSI2	XP_015622023.1 stearoyl-[acyl-carrier-protein] 9-desaturase 2, chloroplastic [Oryza sativa Japonica Group]	Metabolism;Metabolism;Metabolism;Metabolism	Global and overview maps;Global and overview maps;Lipid metabolism;Lipid metabolism	ko01100//Metabolic pathways;ko01212//Fatty acid metabolism;ko00061//Fatty acid biosynthesis;ko01040//Biosynthesis of unsaturated fatty acids	K03921;K03921;K03921;K03921	-	GO:0004767//sphingomyelin phosphodiesterase activity;GO:0016491//oxidoreductase activity;GO:0045300//acyl-[acyl-carrier-protein] desaturase activity;GO:0046872//metal ion binding	GO:0006631//fatty acid metabolic process;GO:0055114//oxidation-reduction process	-
IP_peak_328	cluster1	2357835	2358430	596	2358194	43.5	3.08137	Promoter (1-2kb)	cluster1	2359905	2366408	6504	6	+	SK1G00039604	SK1T00039604-RA	-1711	PIN5A	XP_015621857.1 probable auxin efflux carrier component 5a isoform X1 [Oryza sativa Japonica Group]	-	-	-	-	GO:0016021//integral component of membrane	-	GO:0055085//transmembrane transport	-
IP_peak_329	cluster1	2366432	2366731	300	2366621	34.5	2.22829	Intron (SK1T00039605-RA/SK1G00039605, intron 11 of 13)	cluster1	2363699	2369602	5904	14	-	SK1G00039605	SK1T00039605-RA	2981	--	EEE55899.1 hypothetical protein OsJ_04564 [Oryza sativa Japonica Group]	-	-	-	-	-	GO:0003674//molecular_function;GO:0070205//2-succinyl-6-hydroxy-2,4-cyclohexadiene-1-carboxylate synthase activity	GO:0009234//menaquinone biosynthetic process;GO:0015979//photosynthesis	-
IP_peak_330	cluster1	2374460	2374879	420	2374783	52	2.00934	Intron (SK1T00039606-RA/SK1G00039606, intron 1 of 5)	cluster1	2369682	2375442	5761	6	-	SK1G00039606	SK1T00039606-RA	659	--	EEC72047.1 hypothetical protein OsI_04953 [Oryza sativa Indica Group]	-	-	-	-	-	-	-	-
IP_peak_333	cluster1	2425010	2425538	529	2425215	43.5	2.79859	Intron (SK1T00039610-RA/SK1G00039610, intron 1 of 7)	cluster1	2424164	2429900	5737	8	+	SK1G00039610	SK1T00039610-RA	1051	--	EEC72041.1 hypothetical protein OsI_04945 [Oryza sativa Indica Group]	-	-	-	-	-	-	-	-
IP_peak_334	cluster1	2426209	2426815	607	2426401	40	2.26792	Exon (SK1T00039610-RA/SK1G00039610, exon 6 of 8)	cluster1	2424164	2429900	5737	8	+	SK1G00039610	SK1T00039610-RA	2237	--	EEC72041.1 hypothetical protein OsI_04945 [Oryza sativa Indica Group]	-	-	-	-	-	-	-	-
IP_peak_335	cluster1	2428029	2428343	315	2428215	40.5	2.59232	Intron (SK1T00039610-RA/SK1G00039610, intron 6 of 7)	cluster1	2424164	2429900	5737	8	+	SK1G00039610	SK1T00039610-RA	4051	--	EEC72041.1 hypothetical protein OsI_04945 [Oryza sativa Indica Group]	-	-	-	-	-	-	-	-
IP_peak_336	cluster1	2440333	2440856	524	2440653	40.5	2.53618	Exon (SK1T00039613-RA/SK1G00039613, exon 6 of 8)	cluster1	2438276	2441659	3384	8	+	SK1G00039613	SK1T00039613-RA	2377	XRI1	EEC72039.1 hypothetical protein OsI_04941 [Oryza sativa Indica Group]	-	-	-	-	-	-	-	-
IP_peak_337	cluster1	2441228	2441630	403	2441477	37	2.48543	3' UTR	cluster1	2438276	2441659	3384	8	+	SK1G00039613	SK1T00039613-RA	3201	XRI1	EEC72039.1 hypothetical protein OsI_04941 [Oryza sativa Indica Group]	-	-	-	-	-	-	-	-
IP_peak_339	cluster1	2453074	2453654	581	2453502	33.5	2.26284	Promoter (1-2kb)	cluster1	2454911	2455858	948	1	+	SK1G00039614	SK1T00039614-RA	-1409	--	EEC72038.1 hypothetical protein OsI_04939 [Oryza sativa Indica Group]	-	-	-	-	GO:0000109//nucleotide-excision repair complex;GO:0016021//integral component of membrane;GO:0030289//protein phosphatase 4 complex	GO:0005249//voltage-gated potassium channel activity;GO:0019888//protein phosphatase regulator activity;GO:0030955//potassium ion binding;GO:0046872//metal ion binding	GO:0006289//nucleotide-excision repair;GO:0006813//potassium ion transport	-
IP_peak_340	cluster1	2485173	2485736	564	2485429	54.5	4.03596	Intron (SK1T00039618-RA/SK1G00039618, intron 6 of 6)	cluster1	2481803	2486248	4446	7	+	SK1G00039618	SK1T00039618-RA	3626	Os01g0917400	EAY76977.1 hypothetical protein OsI_04935 [Oryza sativa Indica Group]	-	-	-	-	-	GO:0046872//metal ion binding	-	C3H
IP_peak_342	cluster1	2494574	2495743	1170	2495224	38	2.16914	Downstream (2-3kb)	cluster1	2493953	2494414	462	2	+	SK1G00039619	SK1T00039619-RA	1271	--	XP_015631637.1 IAA-amino acid hydrolase ILR1-like 6 [Oryza sativa Japonica Group]	-	-	-	-	-	-	-	-
IP_peak_343	cluster1	2503315	2504097	783	2503631	37.5	2.66907	Downstream (2-3kb)	cluster1	2497995	2500551	2557	2	-	SK1G00039620	SK1T00039620-RA	-3080	--	XP_015631438.1 uncharacterized protein LOC4324338 [Oryza sativa Japonica Group]	-	-	-	-	-	-	-	-
IP_peak_344	cluster1	2505680	2506093	414	2505887	42.5	2.36408	Downstream (<1kb)	cluster1	2506525	2507322	798	2	-	SK1G00039621	SK1T00039621-RA	1435	--	EAY76973.1 hypothetical protein OsI_04931 [Oryza sativa Indica Group]	-	-	-	-	-	-	-	-
IP_peak_345	cluster1	2514229	2515050	822	2514396	31.5	2.25409	Intron (SK1T00039622-RA/SK1G00039622, intron 2 of 29)	cluster1	2513589	2528686	15098	30	+	SK1G00039622	SK1T00039622-RA	807	THO2	BAS75892.1 Os01g0916800 [Oryza sativa Japonica Group]	Genetic Information Processing;Genetic Information Processing	Transcription;Translation	ko03040//Spliceosome;ko03013//RNA transport	K12879;K12879	-	-	-	-
IP_peak_346	cluster1	2514872	2515595	724	2515279	34	2.35623	Exon (SK1T00039622-RA/SK1G00039622, exon 5 of 30)	cluster1	2513589	2528686	15098	30	+	SK1G00039622	SK1T00039622-RA	1690	THO2	BAS75892.1 Os01g0916800 [Oryza sativa Japonica Group]	Genetic Information Processing;Genetic Information Processing	Transcription;Translation	ko03040//Spliceosome;ko03013//RNA transport	K12879;K12879	-	-	-	-
IP_peak_347	cluster1	2515949	2517405	1457	2516937	45.6666666666667	3.25806666666667	Intron (SK1T00039622-RA/SK1G00039622, intron 9 of 29)	cluster1	2513589	2528686	15098	30	+	SK1G00039622	SK1T00039622-RA	3348	THO2	BAS75892.1 Os01g0916800 [Oryza sativa Japonica Group]	Genetic Information Processing;Genetic Information Processing	Transcription;Translation	ko03040//Spliceosome;ko03013//RNA transport	K12879;K12879	-	-	-	-
IP_peak_348	cluster1	2519396	2520400	1005	2519640	47.5	2.58621	Exon (SK1T00039622-RA/SK1G00039622, exon 14 of 30)	cluster1	2513589	2528686	15098	30	+	SK1G00039622	SK1T00039622-RA	6051	THO2	BAS75892.1 Os01g0916800 [Oryza sativa Japonica Group]	Genetic Information Processing;Genetic Information Processing	Transcription;Translation	ko03040//Spliceosome;ko03013//RNA transport	K12879;K12879	-	-	-	-
IP_peak_349	cluster1	2526098	2527123	1026	2526521	47	2.66827	Exon (SK1T00039622-RA/SK1G00039622, exon 28 of 30)	cluster1	2513589	2528686	15098	30	+	SK1G00039622	SK1T00039622-RA	12932	THO2	BAS75892.1 Os01g0916800 [Oryza sativa Japonica Group]	Genetic Information Processing;Genetic Information Processing	Transcription;Translation	ko03040//Spliceosome;ko03013//RNA transport	K12879;K12879	-	-	-	-
IP_peak_350	cluster1	2529045	2529458	414	2529330	37	2.22335	Downstream (<1kb)	cluster1	2530158	2530863	706	3	-	SK1G00039623	SK1T00039623-RA	1533	--	XP_015622055.1 forkhead box protein G1 [Oryza sativa Japonica Group]	-	-	-	-	-	-	-	-
IP_peak_351	cluster1	2531915	2532260	346	2532118	32.5	2.11003	Promoter (1-2kb)	cluster1	2530158	2530863	706	3	-	SK1G00039623	SK1T00039623-RA	-1255	--	XP_015622055.1 forkhead box protein G1 [Oryza sativa Japonica Group]	-	-	-	-	-	-	-	-
IP_peak_352	cluster1	2545909	2546348	440	2546187	37.5	2.37642	Exon (SK1T00039626-RB/SK1G00039626, exon 5 of 14)	cluster1	2544662	2550712	6051	14	+	SK1G00039626	SK1T00039626-RB	1525	PQBP1	KAF2953975.1 hypothetical protein DAI22_01g447200 [Oryza sativa Japonica Group]	Genetic Information Processing	Transcription	ko03040//Spliceosome	K12865	-	GO:0003824//catalytic activity;GO:0005515//protein binding	GO:0009847//spore germination	-
IP_peak_353	cluster1	2546634	2547992	1359	2547524	51	3.15585	Intron (SK1T00039626-RB/SK1G00039626, intron 7 of 13)	cluster1	2544662	2550712	6051	14	+	SK1G00039626	SK1T00039626-RB	2862	PQBP1	KAF2953975.1 hypothetical protein DAI22_01g447200 [Oryza sativa Japonica Group]	Genetic Information Processing	Transcription	ko03040//Spliceosome	K12865	-	GO:0003824//catalytic activity;GO:0005515//protein binding	GO:0009847//spore germination	-
IP_peak_354	cluster1	2549581	2550579	999	2549993	38.5	2.52102	Promoter (1-2kb)	cluster1	2551401	2558261	6861	11	+	SK1G00039627	SK1T00039627-RA	-1408	At1g31730	EAY76957.1 hypothetical protein OsI_04915 [Oryza sativa Indica Group]	-	-	-	-	GO:0030117//membrane coat	GO:0005515//protein binding;GO:0005524//ATP binding;GO:0017111//nucleoside-triphosphatase activity	GO:0006351//transcription, DNA-templated;GO:0006886//intracellular protein transport;GO:0016192//vesicle-mediated transport	-
IP_peak_355	cluster1	2552920	2553212	293	2553094	50	2.3852	Exon (SK1T00039627-RA/SK1G00039627, exon 3 of 11)	cluster1	2551401	2558261	6861	11	+	SK1G00039627	SK1T00039627-RA	1693	At1g31730	EAY76957.1 hypothetical protein OsI_04915 [Oryza sativa Indica Group]	-	-	-	-	GO:0030117//membrane coat	GO:0005515//protein binding;GO:0005524//ATP binding;GO:0017111//nucleoside-triphosphatase activity	GO:0006351//transcription, DNA-templated;GO:0006886//intracellular protein transport;GO:0016192//vesicle-mediated transport	-
IP_peak_356	cluster1	2561962	2562693	732	2562042	43	2.08621	Promoter (<=1kb)	cluster1	2562780	2563436	657	1	+	SK1G00039628	SK1T00039628-RA	-738	--	XP_015616656.1 glycine-rich cell wall structural protein 2-like [Oryza sativa Japonica Group]	-	-	-	-	-	-	-	-
IP_peak_357	cluster1	2565492	2565836	345	2565622	31.5	1.98537	Promoter (<=1kb)	cluster1	2565959	2566750	792	1	+	SK1G00039629	SK1T00039629-RA	-337	--	EAY76955.1 hypothetical protein OsI_04913 [Oryza sativa Indica Group]	-	-	-	-	-	-	-	-
IP_peak_358	cluster1	2568506	2568816	311	2568605	37.5	1.94077	Promoter (<=1kb)	cluster1	2569219	2570061	843	1	+	SK1G00039630	SK1T00039630-RA	-614	--	EEC72027.1 hypothetical protein OsI_04912 [Oryza sativa Indica Group]	-	-	-	-	-	-	-	-
IP_peak_359	cluster1	2572006	2572735	730	2572142	45	2.90047	Promoter (<=1kb)	cluster1	2573043	2576556	3514	7	+	SK1G00039631	SK1T00039631-RA	-901	FKBP15-1	XP_015625485.1 peptidyl-prolyl cis-trans isomerase FKBP15-1 isoform X1 [Oryza sativa Japonica Group]	-	-	-	-	GO:0005854//nascent polypeptide-associated complex	GO:0003755//peptidyl-prolyl cis-trans isomerase activity;GO:0051082//unfolded protein binding	GO:0051083//'de novo' cotranslational protein folding	-
IP_peak_363	cluster1	2599712	2600357	646	2600001	38	2.31928	Exon (SK1T00039633-RA/SK1G00039633, exon 6 of 29)	cluster1	2598763	2608483	9721	29	+	SK1G00039633	SK1T00039633-RA	1238	SEC	XP_015621048.1 probable UDP-N-acetylglucosamine--peptide N-acetylglucosaminyltransferase SEC [Oryza sativa Japonica Group]	Metabolism	Glycan biosynthesis and metabolism	ko00514//Other types of O-glycan biosynthesis	K09667	GO:0045203//integral component of cell outer membrane	GO:0005215//transporter activity;GO:0005515//protein binding;GO:0008237//metallopeptidase activity;GO:0008270//zinc ion binding;GO:0042802//identical protein binding;GO:0046983//protein dimerization activity	GO:0015774//polysaccharide transport;GO:0042710//biofilm formation	-
IP_peak_364	cluster1	2604747	2605244	498	2605107	38.5	2.48477	Intron (SK1T00039633-RA/SK1G00039633, intron 19 of 28)	cluster1	2598763	2608483	9721	29	+	SK1G00039633	SK1T00039633-RA	6344	SEC	XP_015621048.1 probable UDP-N-acetylglucosamine--peptide N-acetylglucosaminyltransferase SEC [Oryza sativa Japonica Group]	Metabolism	Glycan biosynthesis and metabolism	ko00514//Other types of O-glycan biosynthesis	K09667	GO:0045203//integral component of cell outer membrane	GO:0005215//transporter activity;GO:0005515//protein binding;GO:0008237//metallopeptidase activity;GO:0008270//zinc ion binding;GO:0042802//identical protein binding;GO:0046983//protein dimerization activity	GO:0015774//polysaccharide transport;GO:0042710//biofilm formation	-
IP_peak_365	cluster1	2605860	2606418	559	2606070	42	2.8197	Intron (SK1T00039633-RA/SK1G00039633, intron 20 of 28)	cluster1	2598763	2608483	9721	29	+	SK1G00039633	SK1T00039633-RA	7307	SEC	XP_015621048.1 probable UDP-N-acetylglucosamine--peptide N-acetylglucosaminyltransferase SEC [Oryza sativa Japonica Group]	Metabolism	Glycan biosynthesis and metabolism	ko00514//Other types of O-glycan biosynthesis	K09667	GO:0045203//integral component of cell outer membrane	GO:0005215//transporter activity;GO:0005515//protein binding;GO:0008237//metallopeptidase activity;GO:0008270//zinc ion binding;GO:0042802//identical protein binding;GO:0046983//protein dimerization activity	GO:0015774//polysaccharide transport;GO:0042710//biofilm formation	-
IP_peak_366	cluster1	2606970	2607449	480	2607226	34	2.25308	Intron (SK1T00039633-RA/SK1G00039633, intron 24 of 28)	cluster1	2598763	2608483	9721	29	+	SK1G00039633	SK1T00039633-RA	8463	SEC	XP_015621048.1 probable UDP-N-acetylglucosamine--peptide N-acetylglucosaminyltransferase SEC [Oryza sativa Japonica Group]	Metabolism	Glycan biosynthesis and metabolism	ko00514//Other types of O-glycan biosynthesis	K09667	GO:0045203//integral component of cell outer membrane	GO:0005215//transporter activity;GO:0005515//protein binding;GO:0008237//metallopeptidase activity;GO:0008270//zinc ion binding;GO:0042802//identical protein binding;GO:0046983//protein dimerization activity	GO:0015774//polysaccharide transport;GO:0042710//biofilm formation	-
IP_peak_368	cluster1	2629449	2629843	395	2629553	36.5	2.21995	Intron (SK1T00039637-RA/SK1G00039637, intron 3 of 3)	cluster1	2628295	2631735	3441	4	-	SK1G00039637	SK1T00039637-RA	2182	YLS7	EEC72023.1 hypothetical protein OsI_04903 [Oryza sativa Indica Group]	-	-	-	-	-	-	-	-
IP_peak_369	cluster1	2662721	2663183	463	2662852	37	2.17139	Exon (SK1T00039645-RA/SK1G00039645, exon 1 of 1)	cluster1	2662551	2664035	1485	1	-	SK1G00039645	SK1T00039645-RA	1183	--	EAY76936.1 hypothetical protein OsI_04894 [Oryza sativa Indica Group]	-	-	-	-	-	-	-	-
IP_peak_370	cluster1	2670692	2671058	367	2670884	39	2.47118	5' UTR	cluster1	2669452	2678100	8649	6	+	SK1G00039647	SK1T00039647-RB	1432	EMB2758	KAB8084865.1 hypothetical protein EE612_007521 [Oryza sativa]	-	-	-	-	-	GO:0003676//nucleic acid binding	-	-
IP_peak_371	cluster1	2672731	2673128	398	2672949	35	1.94234	Intron (SK1T00039647-RA/SK1G00039647, intron 3 of 5)	cluster1	2669452	2677018	7567	6	+	SK1G00039647	SK1T00039647-RA	3497	EMB2758	KAB8084865.1 hypothetical protein EE612_007521 [Oryza sativa]	-	-	-	-	-	GO:0003676//nucleic acid binding	-	-
IP_peak_372	cluster1	2674262	2674852	591	2674671	43	1.83011	Intron (SK1T00039647-RA/SK1G00039647, intron 5 of 5)	cluster1	2669452	2677018	7567	6	+	SK1G00039647	SK1T00039647-RA	5219	EMB2758	KAB8084865.1 hypothetical protein EE612_007521 [Oryza sativa]	-	-	-	-	-	GO:0003676//nucleic acid binding	-	-
IP_peak_373	cluster1	2713649	2714097	449	2713893	38.5	3.08467	Intron (SK1T00039654-RA/SK1G00039654, intron 7 of 11)	cluster1	2711864	2716103	4240	12	-	SK1G00039654	SK1T00039654-RA	2210	SRD2	XP_015628206.1 snRNA-activating protein complex subunit isoform X2 [Oryza sativa Japonica Group]	-	-	-	-	-	-	-	-
IP_peak_374	cluster1	2761831	2762416	586	2761890	33	2.32699	Intron (SK1T00039658-RA/SK1G00039658, intron 8 of 12)	cluster1	2759247	2763866	4620	13	+	SK1G00039658	SK1T00039658-RA	2643	--	EEC72013.1 hypothetical protein OsI_04882 [Oryza sativa Indica Group]	-	-	-	-	-	-	-	-
IP_peak_375	cluster1	2763787	2764233	447	2763952	47	2.90998	Downstream (<1kb)	cluster1	2759247	2763866	4620	13	+	SK1G00039658	SK1T00039658-RA	4705	--	EEC72013.1 hypothetical protein OsI_04882 [Oryza sativa Indica Group]	-	-	-	-	-	-	-	-
IP_peak_377	cluster1	2848308	2849520	1213	2848659	38	3.29343	Promoter (1-2kb)	cluster1	2849896	2854471	4576	13	+	SK1G00039661	SK1T00039661-RA	-1237	ABCB26	XP_015613646.1 ABC transporter B family member 26, chloroplastic [Oryza sativa Japonica Group]	Environmental Information Processing	Membrane transport	ko02010//ABC transporters	K05656	GO:0005575//cellular_component;GO:0005737//cytoplasm;GO:0005887//integral component of plasma membrane;GO:0009380//excinuclease repair complex;GO:0009898//cytoplasmic side of plasma membrane;GO:0016021//integral component of membrane;GO:0043190//ATP-binding cassette (ABC) transporter complex;GO:0055051//ATP-binding cassette (ABC) transporter complex, integrated substrate binding;GO:0055052//ATP-b…	GO:0003924//GTPase activity;GO:0004140//dephospho-CoA kinase activity;GO:0005260//channel-conductance-controlling ATPase activity;GO:0005319//lipid transporter activity;GO:0005524//ATP binding;GO:0005525//GTP binding;GO:0008565//protein transporter activity;GO:0009381//excinuclease ABC activity;GO:0015220//choline transmembrane transporter activity;GO:0015221//lipopolysaccharide transmembrane tra…	GO:0000012//single strand break repair;GO:0000910//cytokinesis;GO:0006289//nucleotide-excision repair;GO:0006810//transport;GO:0006817//phosphate ion transport;GO:0006824//cobalt ion transport;GO:0006855//drug transmembrane transport;GO:0006869//lipid transport;GO:0007059//chromosome segregation;GO:0007601//visual perception;GO:0008150//biological_process;GO:0008272//sulfate transport;GO:0015675/…	-
IP_peak_378	cluster1	2851508	2852288	781	2851889	45	3.20254	Intron (SK1T00039661-RA/SK1G00039661, intron 3 of 12)	cluster1	2849896	2854471	4576	13	+	SK1G00039661	SK1T00039661-RA	1993	ABCB26	XP_015613646.1 ABC transporter B family member 26, chloroplastic [Oryza sativa Japonica Group]	Environmental Information Processing	Membrane transport	ko02010//ABC transporters	K05656	GO:0005575//cellular_component;GO:0005737//cytoplasm;GO:0005887//integral component of plasma membrane;GO:0009380//excinuclease repair complex;GO:0009898//cytoplasmic side of plasma membrane;GO:0016021//integral component of membrane;GO:0043190//ATP-binding cassette (ABC) transporter complex;GO:0055051//ATP-binding cassette (ABC) transporter complex, integrated substrate binding;GO:0055052//ATP-b…	GO:0003924//GTPase activity;GO:0004140//dephospho-CoA kinase activity;GO:0005260//channel-conductance-controlling ATPase activity;GO:0005319//lipid transporter activity;GO:0005524//ATP binding;GO:0005525//GTP binding;GO:0008565//protein transporter activity;GO:0009381//excinuclease ABC activity;GO:0015220//choline transmembrane transporter activity;GO:0015221//lipopolysaccharide transmembrane tra…	GO:0000012//single strand break repair;GO:0000910//cytokinesis;GO:0006289//nucleotide-excision repair;GO:0006810//transport;GO:0006817//phosphate ion transport;GO:0006824//cobalt ion transport;GO:0006855//drug transmembrane transport;GO:0006869//lipid transport;GO:0007059//chromosome segregation;GO:0007601//visual perception;GO:0008150//biological_process;GO:0008272//sulfate transport;GO:0015675/…	-
IP_peak_379	cluster1	2855164	2855834	671	2855408	34	2.41301	3' UTR	cluster1	2849896	2854471	4576	13	+	SK1G00039661	SK1T00039661-RA	5512	ABCB26	XP_015613646.1 ABC transporter B family member 26, chloroplastic [Oryza sativa Japonica Group]	Environmental Information Processing	Membrane transport	ko02010//ABC transporters	K05656	GO:0005575//cellular_component;GO:0005737//cytoplasm;GO:0005887//integral component of plasma membrane;GO:0009380//excinuclease repair complex;GO:0009898//cytoplasmic side of plasma membrane;GO:0016021//integral component of membrane;GO:0043190//ATP-binding cassette (ABC) transporter complex;GO:0055051//ATP-binding cassette (ABC) transporter complex, integrated substrate binding;GO:0055052//ATP-b…	GO:0003924//GTPase activity;GO:0004140//dephospho-CoA kinase activity;GO:0005260//channel-conductance-controlling ATPase activity;GO:0005319//lipid transporter activity;GO:0005524//ATP binding;GO:0005525//GTP binding;GO:0008565//protein transporter activity;GO:0009381//excinuclease ABC activity;GO:0015220//choline transmembrane transporter activity;GO:0015221//lipopolysaccharide transmembrane tra…	GO:0000012//single strand break repair;GO:0000910//cytokinesis;GO:0006289//nucleotide-excision repair;GO:0006810//transport;GO:0006817//phosphate ion transport;GO:0006824//cobalt ion transport;GO:0006855//drug transmembrane transport;GO:0006869//lipid transport;GO:0007059//chromosome segregation;GO:0007601//visual perception;GO:0008150//biological_process;GO:0008272//sulfate transport;GO:0015675/…	-
IP_peak_380	cluster1	2857495	2859004	1510	2858588	41	2.95582	Exon (SK1T00039662-RA/SK1G00039662, exon 12 of 19)	cluster1	2855133	2862257	7125	19	-	SK1G00039662	SK1T00039662-RA	3669	RPN2	EEC72011.1 hypothetical protein OsI_04877 [Oryza sativa Indica Group]	Metabolism;Genetic Information Processing;Metabolism;Metabolism	Global and overview maps;Folding, sorting and degradation;Glycan biosynthesis and metabolism;Glycan biosynthesis and metabolism	ko01100//Metabolic pathways;ko04141//Protein processing in endoplasmic reticulum;ko00510//N-Glycan biosynthesis;ko00513//Various types of N-glycan biosynthesis	K12667;K12667;K12667;K12667	GO:0008250//oligosaccharyltransferase complex;GO:0016021//integral component of membrane	-	GO:0006487//protein N-linked glycosylation	-
IP_peak_381	cluster1	2867718	2868468	751	2867895	38	2.66832	Intron (SK1T00039663-RA/SK1G00039663, intron 9 of 16)	cluster1	2865557	2873556	8000	17	+	SK1G00039663	SK1T00039663-RA	2338	Os01g0911100	BAD82339.1 putative DEAD box RNA helicase [Oryza sativa Japonica Group]	Genetic Information Processing	Transcription	ko03040//Spliceosome	K12823	GO:0005576//extracellular region;GO:0009380//excinuclease repair complex;GO:0042600//chorion	GO:0003676//nucleic acid binding;GO:0003677//DNA binding;GO:0004003//ATP-dependent DNA helicase activity;GO:0004386//helicase activity;GO:0004527//exonuclease activity;GO:0005213//structural constituent of chorion;GO:0005524//ATP binding;GO:0008026//ATP-dependent helicase activity;GO:0009381//excinuclease ABC activity;GO:0016787//hydrolase activity	GO:0006139//nucleobase-containing compound metabolic process;GO:0006268//DNA unwinding involved in DNA replication;GO:0006281//DNA repair;GO:0006289//nucleotide-excision repair;GO:0006310//DNA recombination;GO:0007304//chorion-containing eggshell formation;GO:0043571//maintenance of CRISPR repeat elements	-
IP_peak_382	cluster1	2869236	2870018	783	2869644	49	3.07024	3' UTR	cluster1	2865557	2873556	8000	17	+	SK1G00039663	SK1T00039663-RA	4087	Os01g0911100	BAD82339.1 putative DEAD box RNA helicase [Oryza sativa Japonica Group]	Genetic Information Processing	Transcription	ko03040//Spliceosome	K12823	GO:0005576//extracellular region;GO:0009380//excinuclease repair complex;GO:0042600//chorion	GO:0003676//nucleic acid binding;GO:0003677//DNA binding;GO:0004003//ATP-dependent DNA helicase activity;GO:0004386//helicase activity;GO:0004527//exonuclease activity;GO:0005213//structural constituent of chorion;GO:0005524//ATP binding;GO:0008026//ATP-dependent helicase activity;GO:0009381//excinuclease ABC activity;GO:0016787//hydrolase activity	GO:0006139//nucleobase-containing compound metabolic process;GO:0006268//DNA unwinding involved in DNA replication;GO:0006281//DNA repair;GO:0006289//nucleotide-excision repair;GO:0006310//DNA recombination;GO:0007304//chorion-containing eggshell formation;GO:0043571//maintenance of CRISPR repeat elements	-
IP_peak_383	cluster1	2871699	2872950	1252	2872303	43	2.8405	Intron (SK1T00039663-RA/SK1G00039663, intron 14 of 16)	cluster1	2865557	2873556	8000	17	+	SK1G00039663	SK1T00039663-RA	6746	Os01g0911100	BAD82339.1 putative DEAD box RNA helicase [Oryza sativa Japonica Group]	Genetic Information Processing	Transcription	ko03040//Spliceosome	K12823	GO:0005576//extracellular region;GO:0009380//excinuclease repair complex;GO:0042600//chorion	GO:0003676//nucleic acid binding;GO:0003677//DNA binding;GO:0004003//ATP-dependent DNA helicase activity;GO:0004386//helicase activity;GO:0004527//exonuclease activity;GO:0005213//structural constituent of chorion;GO:0005524//ATP binding;GO:0008026//ATP-dependent helicase activity;GO:0009381//excinuclease ABC activity;GO:0016787//hydrolase activity	GO:0006139//nucleobase-containing compound metabolic process;GO:0006268//DNA unwinding involved in DNA replication;GO:0006281//DNA repair;GO:0006289//nucleotide-excision repair;GO:0006310//DNA recombination;GO:0007304//chorion-containing eggshell formation;GO:0043571//maintenance of CRISPR repeat elements	-
IP_peak_384	cluster1	2877966	2878495	530	2878442	33	2.28684	Downstream (2-3kb)	cluster1	2880903	2881208	306	1	+	SK1G00039665	SK1T00039665-RA	-2461	--	XP_015648552.1 protein S100-A9 [Oryza sativa Japonica Group]	-	-	-	-	-	-	-	-
IP_peak_385	cluster1	2878994	2879639	646	2879464	35	2.40866	Promoter (1-2kb)	cluster1	2880903	2881208	306	1	+	SK1G00039665	SK1T00039665-RA	-1439	--	XP_015648552.1 protein S100-A9 [Oryza sativa Japonica Group]	-	-	-	-	-	-	-	-
IP_peak_386	cluster1	2916522	2916792	271	2916665	36.5	2.38168	Downstream (1-2kb)	cluster1	2914867	2916156	1290	1	+	SK1G00039667	SK1T00039667-RA	1798	--	EAY76914.1 hypothetical protein OsI_04875 [Oryza sativa Indica Group]	-	-	-	-	GO:0000775//chromosome, centromeric region	GO:0003677//DNA binding;GO:0003682//chromatin binding	-	-
IP_peak_387	cluster1	2917119	2918154	1036	2917543	43.5	2.8132	Downstream (<1kb)	cluster1	2914867	2916156	1290	1	+	SK1G00039667	SK1T00039667-RA	2676	--	EAY76914.1 hypothetical protein OsI_04875 [Oryza sativa Indica Group]	-	-	-	-	GO:0000775//chromosome, centromeric region	GO:0003677//DNA binding;GO:0003682//chromatin binding	-	-
IP_peak_388	cluster1	2918369	2919412	1044	2918485	41	2.75358	Intron (SK1T00039668-RA/SK1G00039668, intron 6 of 7)	cluster1	2917792	2920225	2434	8	-	SK1G00039668	SK1T00039668-RA	1740	--	EEC72009.1 hypothetical protein OsI_04874 [Oryza sativa Indica Group]	-	-	-	-	-	-	-	-
IP_peak_389	cluster1	2920969	2921924	956	2921736	44	2.56875	Promoter (1-2kb)	cluster1	2917792	2920225	2434	8	-	SK1G00039668	SK1T00039668-RA	-1511	--	EEC72009.1 hypothetical protein OsI_04874 [Oryza sativa Indica Group]	-	-	-	-	-	-	-	-
IP_peak_391	cluster1	2923406	2924629	1224	2923696	35	2.41539	Downstream (2-3kb)	cluster1	2917792	2920225	2434	8	-	SK1G00039668	SK1T00039668-RA	-3471	--	EEC72009.1 hypothetical protein OsI_04874 [Oryza sativa Indica Group]	-	-	-	-	-	-	-	-
IP_peak_392	cluster1	2936423	2937021	599	2936469	35.5	2.00276	3' UTR	cluster1	2934281	2935429	1149	1	+	SK1G00039671	SK1T00039671-RA	2188	--	EAY76910.1 hypothetical protein OsI_04871 [Oryza sativa Indica Group]	-	-	-	-	-	-	-	-
IP_peak_393	cluster1	2937684	2938355	672	2937901	44.5	3.08868	3' UTR	cluster1	2934281	2935429	1149	1	+	SK1G00039671	SK1T00039671-RA	3620	--	EAY76910.1 hypothetical protein OsI_04871 [Oryza sativa Indica Group]	-	-	-	-	-	-	-	-
IP_peak_394	cluster1	2961022	2961702	681	2961420	35	2.04047	Intron (SK1T00039673-RA/SK1G00039673, intron 7 of 9)	cluster1	2945242	2963025	17784	10	+	SK1G00039673	SK1T00039673-RA	16178	HDT1	XP_015616368.1 histone deacetylase HDT2 isoform X1 [Oryza sativa Japonica Group]	-	-	-	-	GO:0032040//small-subunit processome	-	GO:0006270//DNA replication initiation	C2H2
IP_peak_395	cluster1	2962809	2963813	1005	2963440	45.5	2.85849	Promoter (1-2kb)	cluster1	2965114	2966097	984	1	+	SK1G00039674	SK1T00039674-RA	-1674	--	EEC72003.1 hypothetical protein OsI_04864 [Oryza sativa Indica Group]	-	-	-	-	-	-	-	-
IP_peak_396	cluster1	2976912	2978028	1117	2977465	44.5	2.54894	Exon (SK1T00039676-RA/SK1G00039676, exon 13 of 26)	cluster1	2973028	2983507	10480	26	+	SK1G00039676	SK1T00039676-RA	4437	DCL3A	XP_015621462.1 endoribonuclease Dicer homolog 3a [Oryza sativa Japonica Group]	-	-	-	-	GO:0009380//excinuclease repair complex	GO:0003676//nucleic acid binding;GO:0003677//DNA binding;GO:0004003//ATP-dependent DNA helicase activity;GO:0004525//ribonuclease III activity;GO:0005515//protein binding;GO:0005524//ATP binding;GO:0009381//excinuclease ABC activity;GO:0016787//hydrolase activity	GO:0006268//DNA unwinding involved in DNA replication;GO:0006281//DNA repair;GO:0006289//nucleotide-excision repair;GO:0006310//DNA recombination;GO:0006396//RNA processing	-
IP_peak_397	cluster1	2983329	2983588	260	2983443	49.5	3.01656	Promoter (1-2kb)	cluster1	2984797	2985331	535	2	+	SK1G00039677	SK1T00039677-RA	-1354	HDT2	BAS75820.1 Os01g0909150 [Oryza sativa Japonica Group]	-	-	-	-	-	-	-	-
IP_peak_398	cluster1	2986650	2987048	399	2986868	44	2.42153	Downstream (1-2kb)	cluster1	2984797	2985331	535	2	+	SK1G00039677	SK1T00039677-RA	2071	HDT2	BAS75820.1 Os01g0909150 [Oryza sativa Japonica Group]	-	-	-	-	-	-	-	-
IP_peak_399	cluster1	3000562	3001310	749	3000802	39	2.6886	Downstream (<1kb)	cluster1	3001131	3002651	1521	1	-	SK1G00039681	SK1T00039681-RA	1849	--	EAY76899.1 hypothetical protein OsI_04858 [Oryza sativa Indica Group]	-	-	-	-	-	-	-	-
IP_peak_400	cluster1	3012495	3013042	548	3012608	37	2.43161	Exon (SK1T00039682-RA/SK1G00039682, exon 3 of 12)	cluster1	3010842	3015404	4563	12	+	SK1G00039682	SK1T00039682-RA	1766	RGLG2	XP_015616475.1 E3 ubiquitin-protein ligase RGLG2 [Oryza sativa Japonica Group]	-	-	-	-	-	GO:0046872//metal ion binding	-	-
IP_peak_401	cluster1	3014324	3014735	412	3014576	75	4.16055	Intron (SK1T00039682-RA/SK1G00039682, intron 10 of 11)	cluster1	3010842	3015404	4563	12	+	SK1G00039682	SK1T00039682-RA	3734	RGLG2	XP_015616475.1 E3 ubiquitin-protein ligase RGLG2 [Oryza sativa Japonica Group]	-	-	-	-	-	GO:0046872//metal ion binding	-	-
IP_peak_402	cluster1	3028559	3029555	997	3029082	48	2.67062	Promoter (1-2kb)	cluster1	3030450	3033461	3012	5	+	SK1G00039685	SK1T00039685-RA	-1368	--	XP_015614457.1 uncharacterized protein LOC4324987 [Oryza sativa Japonica Group]	-	-	-	-	-	-	-	-
IP_peak_403	cluster1	3031018	3031429	412	3031142	42.5	1.8327	Intron (SK1T00039685-RA/SK1G00039685, intron 1 of 4)	cluster1	3030450	3033461	3012	5	+	SK1G00039685	SK1T00039685-RA	692	--	XP_015614457.1 uncharacterized protein LOC4324987 [Oryza sativa Japonica Group]	-	-	-	-	-	-	-	-
IP_peak_404	cluster1	3040532	3041116	585	3040801	41.5	2.28167	Intron (SK1T00039687-RA/SK1G00039687, intron 3 of 8)	cluster1	3040024	3042951	2928	9	+	SK1G00039687	SK1T00039687-RA	777	TBC1D13	EEC71997.1 hypothetical protein OsI_04852 [Oryza sativa Indica Group]	-	-	-	-	-	-	-	-
IP_peak_405	cluster1	3052564	3053219	656	3052686	39	2.39412	Downstream (1-2kb)	cluster1	3054056	3057599	3544	6	-	SK1G00039689	SK1T00039689-RA	4913	PLA2	A2WY46.1 RecName: Full=Protein terminal ear1 homolog; AltName: Full=Protein LEAFY HEAD2; AltName: Full=Protein PLASTOCHRON2 [Oryza sativa Indica Group]	-	-	-	-	-	GO:0003676//nucleic acid binding	GO:0008380//RNA splicing	-
IP_peak_406	cluster1	3075003	3075420	418	3075082	41.5	1.89698	Exon (SK1T00039691-RA/SK1G00039691, exon 7 of 7)	cluster1	3073607	3080443	6837	7	-	SK1G00039691	SK1T00039691-RA	5361	JMJ705	EEC71996.1 hypothetical protein OsI_04849 [Oryza sativa Indica Group]	-	-	-	-	-	-	-	C2H2
IP_peak_407	cluster1	3076293	3076817	525	3076404	38.5	2.26445	Intron (SK1T00039691-RA/SK1G00039691, intron 5 of 6)	cluster1	3073607	3080443	6837	7	-	SK1G00039691	SK1T00039691-RA	4039	JMJ705	EEC71996.1 hypothetical protein OsI_04849 [Oryza sativa Indica Group]	-	-	-	-	-	-	-	C2H2
IP_peak_408	cluster1	3078972	3079357	386	3079219	44.5	2.82059	Intron (SK1T00039691-RA/SK1G00039691, intron 2 of 6)	cluster1	3073607	3080443	6837	7	-	SK1G00039691	SK1T00039691-RA	1224	JMJ705	EEC71996.1 hypothetical protein OsI_04849 [Oryza sativa Indica Group]	-	-	-	-	-	-	-	C2H2
IP_peak_409	cluster1	3084284	3084820	537	3084540	38	2.64387	Intron (SK1T00039692-RA/SK1G00039692, intron 5 of 12)	cluster1	3081532	3086682	5151	13	-	SK1G00039692	SK1T00039692-RA	2142	PIGS	XP_015622389.1 GPI transamidase component PIG-S [Oryza sativa Japonica Group]	Metabolism;Metabolism	Global and overview maps;Glycan biosynthesis and metabolism	ko01100//Metabolic pathways;ko00563//Glycosylphosphatidylinositol(GPI)-anchor biosynthesis	K05291;K05291	GO:0042765//GPI-anchor transamidase complex	-	GO:0016255//attachment of GPI anchor to protein	-
IP_peak_410	cluster1	3088276	3089062	787	3088787	33.5	2.0658	Downstream (<1kb)	cluster1	3088813	3089849	1037	2	-	SK1G00039693	SK1T00039693-RA	1062	BAG4	XP_015642263.1 BAG family molecular chaperone regulator 2 [Oryza sativa Japonica Group]	-	-	-	-	-	GO:0005515//protein binding	-	-
IP_peak_411	cluster1	3113222	3113775	554	3113669	29.5	2.06304	Intron (SK1T00039699-RA/SK1G00039699, intron 4 of 19)	cluster1	3110171	3120985	10815	20	+	SK1G00039699	SK1T00039699-RA	3498	VPS53	EEC71991.1 hypothetical protein OsI_04842 [Oryza sativa Indica Group]	-	-	-	-	GO:0000145//exocyst;GO:0005783//endoplasmic reticulum;GO:0017119//Golgi transport complex	GO:0003677//DNA binding;GO:0046983//protein dimerization activity	GO:0006886//intracellular protein transport;GO:0006887//exocytosis;GO:0048193//Golgi vesicle transport	M-type
IP_peak_412	cluster1	3114679	3116203	1525	3115252	37.5	2.5895	Intron (SK1T00039699-RA/SK1G00039699, intron 6 of 19)	cluster1	3110171	3120985	10815	20	+	SK1G00039699	SK1T00039699-RA	5081	VPS53	EEC71991.1 hypothetical protein OsI_04842 [Oryza sativa Indica Group]	-	-	-	-	GO:0000145//exocyst;GO:0005783//endoplasmic reticulum;GO:0017119//Golgi transport complex	GO:0003677//DNA binding;GO:0046983//protein dimerization activity	GO:0006886//intracellular protein transport;GO:0006887//exocytosis;GO:0048193//Golgi vesicle transport	M-type
IP_peak_413	cluster1	3116497	3117419	923	3117288	45.5	3.04445	Intron (SK1T00039699-RA/SK1G00039699, intron 11 of 19)	cluster1	3110171	3120985	10815	20	+	SK1G00039699	SK1T00039699-RA	7117	VPS53	EEC71991.1 hypothetical protein OsI_04842 [Oryza sativa Indica Group]	-	-	-	-	GO:0000145//exocyst;GO:0005783//endoplasmic reticulum;GO:0017119//Golgi transport complex	GO:0003677//DNA binding;GO:0046983//protein dimerization activity	GO:0006886//intracellular protein transport;GO:0006887//exocytosis;GO:0048193//Golgi vesicle transport	M-type
IP_peak_415	cluster1	3128016	3129008	993	3128521	36	2.17598	Intron (SK1T00039700-RA/SK1G00039700, intron 1 of 13)	cluster1	3127788	3132296	4509	14	+	SK1G00039700	SK1T00039700-RA	733	--	XP_015625550.1 uncharacterized protein LOC4324974 [Oryza sativa Japonica Group]	-	-	-	-	-	GO:0016757//transferase activity, transferring glycosyl groups	-	-
IP_peak_416	cluster1	3130190	3131893	1704	3130879	45	2.92353	Intron (SK1T00039700-RA/SK1G00039700, intron 9 of 13)	cluster1	3127788	3132296	4509	14	+	SK1G00039700	SK1T00039700-RA	3091	--	XP_015625550.1 uncharacterized protein LOC4324974 [Oryza sativa Japonica Group]	-	-	-	-	-	GO:0016757//transferase activity, transferring glycosyl groups	-	-
IP_peak_417	cluster1	3146841	3147484	644	3147193	40.5	2.25174	Promoter (1-2kb)	cluster1	3142331	3145681	3351	5	-	SK1G00039703	SK1T00039703-RA	-1512	AIRP2	XP_015621835.1 E3 ubiquitin-protein ligase AIRP2 [Oryza sativa Japonica Group]	-	-	-	-	GO:0000109//nucleotide-excision repair complex;GO:0005675//holo TFIIH complex	GO:0004693//cyclin-dependent protein serine/threonine kinase activity;GO:0008270//zinc ion binding;GO:0046872//metal ion binding	GO:0006289//nucleotide-excision repair;GO:0006352//DNA-templated transcription, initiation	-
IP_peak_420	cluster1	3196533	3197462	930	3197132	35	2.51626	Exon (SK1T00039709-RA/SK1G00039709, exon 3 of 5)	cluster1	3195523	3199491	3969	5	+	SK1G00039709	SK1T00039709-RA	1609	RR26	EEC71985.1 hypothetical protein OsI_04831 [Oryza sativa Indica Group]	Environmental Information Processing	Signal transduction	ko04075//Plant hormone signal transduction	K14491	GO:0016020//membrane	GO:0000156//phosphorelay response regulator activity;GO:0003677//DNA binding;GO:0003700//transcription factor activity, sequence-specific DNA binding;GO:0004673//protein histidine kinase activity;GO:0005524//ATP binding	GO:0000160//phosphorelay signal transduction system;GO:0006355//regulation of transcription, DNA-templated;GO:0006796//phosphate-containing compound metabolic process;GO:0006808//regulation of nitrogen utilization;GO:0030436//asexual sporulation;GO:0042173//regulation of sporulation resulting in formation of a cellular spore	ARR-B
IP_peak_421	cluster1	3207744	3208431	688	3207954	37	2.6172	Intron (SK1T00039710-RA/SK1G00039710, intron 1 of 7)	cluster1	3207200	3211846	4647	8	+	SK1G00039710	SK1T00039710-RA	754	SERGT1	XP_015638657.1 peptidyl serine alpha-galactosyltransferase [Oryza sativa Japonica Group]	Metabolism	Glycan biosynthesis and metabolism	ko00514//Other types of O-glycan biosynthesis	K20781	-	-	-	-
IP_peak_422	cluster1	3208711	3209060	350	3208876	43.5	2.22104	Exon (SK1T00039710-RA/SK1G00039710, exon 3 of 8)	cluster1	3207200	3211846	4647	8	+	SK1G00039710	SK1T00039710-RA	1676	SERGT1	XP_015638657.1 peptidyl serine alpha-galactosyltransferase [Oryza sativa Japonica Group]	Metabolism	Glycan biosynthesis and metabolism	ko00514//Other types of O-glycan biosynthesis	K20781	-	-	-	-
IP_peak_423	cluster1	3214236	3215095	860	3214754	45	2.92312	Exon (SK1T00039711-RA/SK1G00039711, exon 3 of 21)	cluster1	3212539	3220834	8296	21	+	SK1G00039711	SK1T00039711-RA	2215	SMC2-2	CAD59410.1 SMC2 protein [Oryza sativa]	-	-	-	-	GO:0005694//chromosome;GO:0005737//cytoplasm;GO:0005887//integral component of plasma membrane;GO:0009898//cytoplasmic side of plasma membrane;GO:0019028//viral capsid;GO:0019031//viral envelope;GO:0043190//ATP-binding cassette (ABC) transporter complex;GO:0055051//ATP-binding cassette (ABC) transporter complex, integrated substrate binding;GO:0055052//ATP-binding cassette (ABC) transporter compl…	GO:0004527//exonuclease activity;GO:0005198//structural molecule activity;GO:0005319//lipid transporter activity;GO:0005515//protein binding;GO:0005524//ATP binding;GO:0015439//heme-transporting ATPase activity;GO:0015619//thiamine pyrophosphate-transporting ATPase activity;GO:0016887//ATPase activity;GO:0033230//cysteine-transporting ATPase activity;GO:0048502//thiamine-transporting ATPase activ…	GO:0006260//DNA replication;GO:0006281//DNA repair;GO:0006310//DNA recombination;GO:0006869//lipid transport;GO:0007059//chromosome segregation;GO:0015886//heme transport;GO:0015888//thiamine transport;GO:0030261//chromosome condensation;GO:0030974//thiamine pyrophosphate transport;GO:0033228//cysteine export;GO:0051276//chromosome organization;GO:0051607//defense response to virus	-
IP_peak_424	cluster1	3216275	3216683	409	3216531	35	2.12214	Intron (SK1T00039711-RA/SK1G00039711, intron 9 of 20)	cluster1	3212539	3220834	8296	21	+	SK1G00039711	SK1T00039711-RA	3992	SMC2-2	CAD59410.1 SMC2 protein [Oryza sativa]	-	-	-	-	GO:0005694//chromosome;GO:0005737//cytoplasm;GO:0005887//integral component of plasma membrane;GO:0009898//cytoplasmic side of plasma membrane;GO:0019028//viral capsid;GO:0019031//viral envelope;GO:0043190//ATP-binding cassette (ABC) transporter complex;GO:0055051//ATP-binding cassette (ABC) transporter complex, integrated substrate binding;GO:0055052//ATP-binding cassette (ABC) transporter compl…	GO:0004527//exonuclease activity;GO:0005198//structural molecule activity;GO:0005319//lipid transporter activity;GO:0005515//protein binding;GO:0005524//ATP binding;GO:0015439//heme-transporting ATPase activity;GO:0015619//thiamine pyrophosphate-transporting ATPase activity;GO:0016887//ATPase activity;GO:0033230//cysteine-transporting ATPase activity;GO:0048502//thiamine-transporting ATPase activ…	GO:0006260//DNA replication;GO:0006281//DNA repair;GO:0006310//DNA recombination;GO:0006869//lipid transport;GO:0007059//chromosome segregation;GO:0015886//heme transport;GO:0015888//thiamine transport;GO:0030261//chromosome condensation;GO:0030974//thiamine pyrophosphate transport;GO:0033228//cysteine export;GO:0051276//chromosome organization;GO:0051607//defense response to virus	-
IP_peak_425	cluster1	3219059	3219646	588	3219521	39.5	1.95512	Exon (SK1T00039711-RA/SK1G00039711, exon 18 of 21)	cluster1	3212539	3220834	8296	21	+	SK1G00039711	SK1T00039711-RA	6982	SMC2-2	CAD59410.1 SMC2 protein [Oryza sativa]	-	-	-	-	GO:0005694//chromosome;GO:0005737//cytoplasm;GO:0005887//integral component of plasma membrane;GO:0009898//cytoplasmic side of plasma membrane;GO:0019028//viral capsid;GO:0019031//viral envelope;GO:0043190//ATP-binding cassette (ABC) transporter complex;GO:0055051//ATP-binding cassette (ABC) transporter complex, integrated substrate binding;GO:0055052//ATP-binding cassette (ABC) transporter compl…	GO:0004527//exonuclease activity;GO:0005198//structural molecule activity;GO:0005319//lipid transporter activity;GO:0005515//protein binding;GO:0005524//ATP binding;GO:0015439//heme-transporting ATPase activity;GO:0015619//thiamine pyrophosphate-transporting ATPase activity;GO:0016887//ATPase activity;GO:0033230//cysteine-transporting ATPase activity;GO:0048502//thiamine-transporting ATPase activ…	GO:0006260//DNA replication;GO:0006281//DNA repair;GO:0006310//DNA recombination;GO:0006869//lipid transport;GO:0007059//chromosome segregation;GO:0015886//heme transport;GO:0015888//thiamine transport;GO:0030261//chromosome condensation;GO:0030974//thiamine pyrophosphate transport;GO:0033228//cysteine export;GO:0051276//chromosome organization;GO:0051607//defense response to virus	-
IP_peak_426	cluster1	3221314	3222389	1076	3221747	42	2.68678	Intron (SK1T00039712-RA/SK1G00039712, intron 3 of 3)	cluster1	3221499	3223488	1990	4	-	SK1G00039712	SK1T00039712-RA	1741	--	XP_015620893.1 uncharacterized protein LOC4325019 [Oryza sativa Japonica Group]	-	-	-	-	-	-	-	-
IP_peak_427	cluster1	3222699	3223301	603	3223081	38.5	2.47568	Intron (SK1T00039712-RA/SK1G00039712, intron 1 of 3)	cluster1	3221499	3223488	1990	4	-	SK1G00039712	SK1T00039712-RA	407	--	XP_015620893.1 uncharacterized protein LOC4325019 [Oryza sativa Japonica Group]	-	-	-	-	-	-	-	-
IP_peak_428	cluster1	3226038	3226451	414	3226188	32	1.87759	Intron (SK1T00039713-RA/SK1G00039713, intron 6 of 11)	cluster1	3223976	3229367	5392	12	+	SK1G00039713	SK1T00039713-RA	2212	ADCK1	EEC71983.1 hypothetical protein OsI_04827 [Oryza sativa Indica Group]	-	-	-	-	-	GO:0016709//oxidoreductase activity, acting on paired donors, with incorporation or reduction of molecular oxygen, NAD(P)H as one donor, and incorporation of one atom of oxygen	GO:0006744//ubiquinone biosynthetic process	-
IP_peak_429	cluster1	3228717	3229147	431	3228948	36	2.05588	Intron (SK1T00039713-RA/SK1G00039713, intron 11 of 11)	cluster1	3223976	3229367	5392	12	+	SK1G00039713	SK1T00039713-RA	4972	ADCK1	EEC71983.1 hypothetical protein OsI_04827 [Oryza sativa Indica Group]	-	-	-	-	-	GO:0016709//oxidoreductase activity, acting on paired donors, with incorporation or reduction of molecular oxygen, NAD(P)H as one donor, and incorporation of one atom of oxygen	GO:0006744//ubiquinone biosynthetic process	-
IP_peak_431	cluster1	3262090	3262403	314	3262229	43.5	2.99579	Intron (SK1T00039717-RA/SK1G00039717, intron 3 of 7)	cluster1	3258560	3265969	7410	8	-	SK1G00039717	SK1T00039717-RA	3740	NPF8.3	EEC71979.1 hypothetical protein OsI_04820 [Oryza sativa Indica Group]	-	-	-	-	GO:0016020//membrane	GO:0015333//peptide:proton symporter activity;GO:0022857//transmembrane transporter activity	GO:0015833//peptide transport;GO:0055085//transmembrane transport	-
IP_peak_432	cluster1	3277399	3277975	577	3277752	41	2.3186	Intron (SK1T00039719-RA/SK1G00039719, intron 13 of 19)	cluster1	3275560	3286093	10534	20	-	SK1G00039719	SK1T00039719-RA	8341	At1g67690	EEC71978.1 hypothetical protein OsI_04818 [Oryza sativa Indica Group]	-	-	-	-	GO:0015627//type II protein secretion system complex	GO:0003674//molecular_function;GO:0004222//metalloendopeptidase activity	GO:0006508//proteolysis;GO:0015628//protein secretion by the type II secretion system;GO:0033103//protein secretion by the type VI secretion system	-
IP_peak_433	cluster1	3291203	3291580	378	3291328	43.5	2.89916	Downstream (1-2kb)	cluster1	3292694	3293017	324	1	-	SK1G00039720	SK1T00039720-RA	1689	--	BAF07029.1 Os01g0902000 [Oryza sativa Japonica Group]	-	-	-	-	-	-	-	-
IP_peak_434	cluster1	3296482	3297644	1163	3296922	39.5	2.51374	Exon (SK1T00039721-RA/SK1G00039721, exon 4 of 9)	cluster1	3293335	3299191	5857	9	+	SK1G00039721	SK1T00039721-RA	3587	ABCC5	XP_015616248.1 putative ABC transporter C family member 15 [Oryza sativa Japonica Group]	-	-	-	-	GO:0005575//cellular_component;GO:0005737//cytoplasm;GO:0005887//integral component of plasma membrane;GO:0009288//bacterial-type flagellum;GO:0009380//excinuclease repair complex;GO:0009898//cytoplasmic side of plasma membrane;GO:0015627//type II protein secretion system complex;GO:0016021//integral component of membrane;GO:0030257//type III protein secretion system complex;GO:0043190//ATP-bindi…	GO:0000166//nucleotide binding;GO:0003677//DNA binding;GO:0003924//GTPase activity;GO:0005260//channel-conductance-controlling ATPase activity;GO:0005319//lipid transporter activity;GO:0005524//ATP binding;GO:0005525//GTP binding;GO:0008565//protein transporter activity;GO:0009381//excinuclease ABC activity;GO:0015220//choline transmembrane transporter activity;GO:0015221//lipopolysaccharide tran…	GO:0000910//cytokinesis;GO:0001539//cilium or flagellum-dependent cell motility;GO:0006289//nucleotide-excision repair;GO:0006810//transport;GO:0006817//phosphate ion transport;GO:0006824//cobalt ion transport;GO:0006855//drug transmembrane transport;GO:0006869//lipid transport;GO:0007601//visual perception;GO:0008150//biological_process;GO:0008272//sulfate transport;GO:0009405//pathogenesis;GO:0…	-
IP_peak_435	cluster1	3298114	3298822	709	3298620	43.5	2.66211	Promoter (1-2kb)	cluster1	3300405	3304855	4451	12	+	SK1G00039722	SK1T00039722-RA	-1785	PTAC10	XP_015616255.1 protein PLASTID TRANSCRIPTIONALLY ACTIVE 10 [Oryza sativa Japonica Group]	-	-	-	-	-	-	-	-
IP_peak_436	cluster1	3299246	3299765	520	3299429	40.5	2.60778	Promoter (<=1kb)	cluster1	3300405	3304855	4451	12	+	SK1G00039722	SK1T00039722-RA	-976	PTAC10	XP_015616255.1 protein PLASTID TRANSCRIPTIONALLY ACTIVE 10 [Oryza sativa Japonica Group]	-	-	-	-	-	-	-	-
IP_peak_437	cluster1	3301775	3302562	788	3302377	45.5	2.78491	Intron (SK1T00039722-RA/SK1G00039722, intron 3 of 11)	cluster1	3300405	3304855	4451	12	+	SK1G00039722	SK1T00039722-RA	1972	PTAC10	XP_015616255.1 protein PLASTID TRANSCRIPTIONALLY ACTIVE 10 [Oryza sativa Japonica Group]	-	-	-	-	-	-	-	-
IP_peak_438	cluster1	3302919	3303761	843	3303471	36.5	2.13107	Intron (SK1T00039722-RA/SK1G00039722, intron 8 of 11)	cluster1	3300405	3304855	4451	12	+	SK1G00039722	SK1T00039722-RA	3066	PTAC10	XP_015616255.1 protein PLASTID TRANSCRIPTIONALLY ACTIVE 10 [Oryza sativa Japonica Group]	-	-	-	-	-	-	-	-
IP_peak_439	cluster1	3307794	3308413	620	3308180	39	2.39443	Intron (SK1T00039723-RA/SK1G00039723, intron 4 of 4)	cluster1	3306135	3308318	2184	5	+	SK1G00039723	SK1T00039723-RA	2045	yuiD	XP_015624381.1 uncharacterized protein LOC4325009 [Oryza sativa Japonica Group]	-	-	-	-	-	-	-	-
IP_peak_440	cluster1	3332328	3332633	306	3332495	37	2.69408	Exon (SK1T00039727-RA/SK1G00039727, exon 5 of 6)	cluster1	3331868	3335320	3453	6	-	SK1G00039727	SK1T00039727-RA	2825	4CLL5	XP_025878198.1 4-coumarate--CoA ligase-like 5 [Oryza sativa Japonica Group]	Metabolism;Metabolism;Metabolism;Metabolism	Global and overview maps;Global and overview maps;Biosynthesis of other secondary metabolites;Metabolism of cofactors and vitamins	ko01100//Metabolic pathways;ko01110//Biosynthesis of secondary metabolites;ko00940//Phenylpropanoid biosynthesis;ko00130//Ubiquinone and other terpenoid-quinone biosynthesis	K01904;K01904;K01904;K01904	-	GO:0003987//acetate-CoA ligase activity;GO:0008668//(2,3-dihydroxybenzoyl)adenylate synthase activity;GO:0008756//o-succinylbenzoate-CoA ligase activity;GO:0030729//acetoacetate-CoA ligase activity;GO:0047473//D-alanine-poly(phosphoribitol) ligase activity;GO:0047475//phenylacetate-CoA ligase activity;GO:0050218//propionate-CoA ligase activity	GO:0009234//menaquinone biosynthetic process;GO:0010124//phenylacetate catabolic process;GO:0019287//isopentenyl diphosphate biosynthetic process, mevalonate pathway;GO:0019290//siderophore biosynthetic process;GO:0019350//teichoic acid biosynthetic process;GO:0019427//acetyl-CoA biosynthetic process from acetate	-
IP_peak_441	cluster1	3342261	3343425	1165	3342879	35	2.23205	Exon (SK1T00039728-RA/SK1G00039728, exon 4 of 7)	cluster1	3341570	3344125	2556	7	-	SK1G00039728	SK1T00039728-RA	1246	VTC2	EEC71974.1 hypothetical protein OsI_04811 [Oryza sativa Indica Group]	Metabolism;Metabolism;Metabolism	Global and overview maps;Global and overview maps;Carbohydrate metabolism	ko01100//Metabolic pathways;ko01110//Biosynthesis of secondary metabolites;ko00053//Ascorbate and aldarate metabolism	K14190;K14190;K14190	-	-	-	-
IP_peak_443	cluster1	3360015	3360755	741	3360294	38.5	2.55628	Promoter (1-2kb)	cluster1	3362278	3366559	4282	6	+	SK1G00039730	SK1T00039730-RA	-1984	PUB45	EEC71972.1 hypothetical protein OsI_04809 [Oryza sativa Indica Group]	-	-	-	-	GO:0000109//nucleotide-excision repair complex	GO:0004842//ubiquitin-protein transferase activity;GO:0005515//protein binding;GO:0008270//zinc ion binding	GO:0006289//nucleotide-excision repair;GO:0016567//protein ubiquitination	-
IP_peak_444	cluster1	3361247	3361889	643	3361520	37.5	2.48	Promoter (<=1kb)	cluster1	3362278	3366559	4282	6	+	SK1G00039730	SK1T00039730-RA	-758	PUB45	EEC71972.1 hypothetical protein OsI_04809 [Oryza sativa Indica Group]	-	-	-	-	GO:0000109//nucleotide-excision repair complex	GO:0004842//ubiquitin-protein transferase activity;GO:0005515//protein binding;GO:0008270//zinc ion binding	GO:0006289//nucleotide-excision repair;GO:0016567//protein ubiquitination	-
IP_peak_445	cluster1	3370319	3371087	769	3370561	48.5	2.71337	Downstream (1-2kb)	cluster1	3372139	3377901	5763	6	-	SK1G00039731	SK1T00039731-RA	7340	BHLH128	ADX60271.1 bHLH transcription factor, partial [Oryza sativa Japonica Group]	-	-	-	-	-	GO:0046983//protein dimerization activity	-	bHLH
IP_peak_446	cluster1	3376349	3376917	569	3376672	43	2.80303	Intron (SK1T00039731-RA/SK1G00039731, intron 1 of 5)	cluster1	3372139	3377901	5763	6	-	SK1G00039731	SK1T00039731-RA	1229	BHLH128	ADX60271.1 bHLH transcription factor, partial [Oryza sativa Japonica Group]	-	-	-	-	-	GO:0046983//protein dimerization activity	-	bHLH
IP_peak_447	cluster1	3389313	3389729	417	3389585	39.5	2.21657	Downstream (2-3kb)	cluster1	3391674	3391913	240	1	+	SK1G00039732	SK1T00039732-RA	-2089	--	BAS75744.1 Os01g0900750 [Oryza sativa Japonica Group]	-	-	-	-	-	-	-	-
IP_peak_451	cluster1	3419714	3420326	613	3420135	40.5	2.8674	Promoter (<=1kb)	cluster1	3417971	3419314	1344	1	-	SK1G00039734	SK1T00039734-RA	-821	EG1	XP_015640022.2 phospholipase A1 EG1, chloroplastic/mitochondrial [Oryza sativa Japonica Group]	-	-	-	-	-	-	GO:0006629//lipid metabolic process	-
IP_peak_452	cluster1	3420734	3421143	410	3420983	39.5	2.64622	Promoter (1-2kb)	cluster1	3417971	3419314	1344	1	-	SK1G00039734	SK1T00039734-RA	-1669	EG1	XP_015640022.2 phospholipase A1 EG1, chloroplastic/mitochondrial [Oryza sativa Japonica Group]	-	-	-	-	-	-	GO:0006629//lipid metabolic process	-
IP_peak_455	cluster1	3431662	3432336	675	3431727	32.5	1.86415	Intron (SK1T00039735-RA/SK1G00039735, intron 12 of 12)	cluster1	3430081	3438833	8753	13	-	SK1G00039735	SK1T00039735-RA	7106	Daglb	XP_015621117.2 uncharacterized protein LOC4325036 [Oryza sativa Japonica Group]	-	-	-	-	-	-	GO:0006629//lipid metabolic process	-
IP_peak_456	cluster1	3432582	3432920	339	3432805	44	2.24557	Exon (SK1T00039735-RA/SK1G00039735, exon 12 of 13)	cluster1	3430081	3438833	8753	13	-	SK1G00039735	SK1T00039735-RA	6028	Daglb	XP_015621117.2 uncharacterized protein LOC4325036 [Oryza sativa Japonica Group]	-	-	-	-	-	-	GO:0006629//lipid metabolic process	-
IP_peak_457	cluster1	3434426	3435118	693	3434879	36.5	2.08498	Exon (SK1T00039735-RA/SK1G00039735, exon 7 of 13)	cluster1	3430081	3438833	8753	13	-	SK1G00039735	SK1T00039735-RA	3954	Daglb	XP_015621117.2 uncharacterized protein LOC4325036 [Oryza sativa Japonica Group]	-	-	-	-	-	-	GO:0006629//lipid metabolic process	-
IP_peak_458	cluster1	3436313	3436619	307	3436448	38.5	2.77138	Exon (SK1T00039735-RA/SK1G00039735, exon 5 of 13)	cluster1	3430081	3438833	8753	13	-	SK1G00039735	SK1T00039735-RA	2385	Daglb	XP_015621117.2 uncharacterized protein LOC4325036 [Oryza sativa Japonica Group]	-	-	-	-	-	-	GO:0006629//lipid metabolic process	-
IP_peak_459	cluster1	3436994	3437337	344	3437161	37	2.64502	Exon (SK1T00039735-RA/SK1G00039735, exon 3 of 13)	cluster1	3430081	3438833	8753	13	-	SK1G00039735	SK1T00039735-RA	1672	Daglb	XP_015621117.2 uncharacterized protein LOC4325036 [Oryza sativa Japonica Group]	-	-	-	-	-	-	GO:0006629//lipid metabolic process	-
IP_peak_460	cluster1	3444319	3444683	365	3444468	30	2.49709	Promoter (<=1kb)	cluster1	3444526	3444711	186	1	+	SK1G00039737	SK1T00039737-RA	-58	--	KAB8088062.1 hypothetical protein EE612_012535 [Oryza sativa]	-	-	-	-	-	-	-	-
IP_peak_463	cluster1	3453903	3454607	705	3454037	50.5	3.13075	Exon (SK1T00039738-RA/SK1G00039738, exon 3 of 8)	cluster1	3452720	3456394	3675	8	+	SK1G00039738	SK1T00039738-RA	1317	BBM2	EEC71967.1 hypothetical protein OsI_04803 [Oryza sativa Indica Group]	-	-	-	-	-	GO:0003700//transcription factor activity, sequence-specific DNA binding	GO:0006355//regulation of transcription, DNA-templated	AP2
IP_peak_465	cluster1	3462207	3463028	822	3462689	35	2.13328	Promoter (<=1kb)	cluster1	3463263	3468014	4752	13	+	SK1G00039740	SK1T00039740-RA	-574	--	XP_015622399.1 uncharacterized protein At3g49140 [Oryza sativa Japonica Group]	-	-	-	-	-	-	-	-
IP_peak_466	cluster1	3495256	3495838	583	3495618	32.5	2.22088	Downstream (<1kb)	cluster1	3496160	3498652	2493	4	-	SK1G00039746	SK1T00039746-RA	3034	OsI_14861	XP_015646579.1 papaya proteinase 4 [Oryza sativa Japonica Group]	Cellular Processes	Transport and catabolism	ko04145//Phagosome	K01365	-	-	-	-
IP_peak_467	cluster1	3498424	3498731	308	3498570	49.5	2.90291	Intron (SK1T00039746-RA/SK1G00039746, intron 1 of 3)	cluster1	3496160	3498652	2493	4	-	SK1G00039746	SK1T00039746-RA	82	OsI_14861	XP_015646579.1 papaya proteinase 4 [Oryza sativa Japonica Group]	Cellular Processes	Transport and catabolism	ko04145//Phagosome	K01365	-	-	-	-
IP_peak_468	cluster1	3503134	3504267	1134	3503550	45.5	2.6392	Exon (SK1T00039747-RA/SK1G00039747, exon 3 of 8)	cluster1	3502291	3505882	3592	8	+	SK1G00039747	SK1T00039747-RA	1259	PTI11	EEC71964.1 hypothetical protein OsI_04798 [Oryza sativa Indica Group]	Organismal Systems	Environmental adaptation	ko04626//Plant-pathogen interaction	K13436	-	GO:0004672//protein kinase activity;GO:0005524//ATP binding	GO:0006468//protein phosphorylation	-
IP_peak_469	cluster1	3504584	3505125	542	3504705	37.5	1.96632	Intron (SK1T00039747-RA/SK1G00039747, intron 5 of 7)	cluster1	3502291	3505882	3592	8	+	SK1G00039747	SK1T00039747-RA	2414	PTI11	EEC71964.1 hypothetical protein OsI_04798 [Oryza sativa Indica Group]	Organismal Systems	Environmental adaptation	ko04626//Plant-pathogen interaction	K13436	-	GO:0004672//protein kinase activity;GO:0005524//ATP binding	GO:0006468//protein phosphorylation	-
IP_peak_470	cluster1	3507715	3508730	1016	3508224	51.5	2.64237	Exon (SK1T00039748-RA/SK1G00039748, exon 11 of 16)	cluster1	3506688	3512537	5850	16	-	SK1G00039748	SK1T00039748-RA	4313	CSTLP3	XP_015621473.1 CMP-sialic acid transporter 3 [Oryza sativa Japonica Group]	-	-	-	-	GO:0000139//Golgi membrane;GO:0016021//integral component of membrane	GO:0015165//pyrimidine nucleotide-sugar transmembrane transporter activity	GO:0090481//pyrimidine nucleotide-sugar transmembrane transport	-
IP_peak_471	cluster1	3509307	3510590	1284	3509974	45.5	2.74986	Exon (SK1T00039748-RA/SK1G00039748, exon 7 of 16)	cluster1	3506688	3512537	5850	16	-	SK1G00039748	SK1T00039748-RA	2563	CSTLP3	XP_015621473.1 CMP-sialic acid transporter 3 [Oryza sativa Japonica Group]	-	-	-	-	GO:0000139//Golgi membrane;GO:0016021//integral component of membrane	GO:0015165//pyrimidine nucleotide-sugar transmembrane transporter activity	GO:0090481//pyrimidine nucleotide-sugar transmembrane transport	-
IP_peak_472	cluster1	3511117	3511432	316	3511290	51.5	3.15847	Intron (SK1T00039748-RA/SK1G00039748, intron 2 of 15)	cluster1	3506688	3512537	5850	16	-	SK1G00039748	SK1T00039748-RA	1247	CSTLP3	XP_015621473.1 CMP-sialic acid transporter 3 [Oryza sativa Japonica Group]	-	-	-	-	GO:0000139//Golgi membrane;GO:0016021//integral component of membrane	GO:0015165//pyrimidine nucleotide-sugar transmembrane transporter activity	GO:0090481//pyrimidine nucleotide-sugar transmembrane transport	-
IP_peak_473	cluster1	3516189	3517030	842	3516936	53.5	2.84187	Intron (SK1T00039749-RA/SK1G00039749, intron 2 of 2)	cluster1	3515077	3518469	3393	3	-	SK1G00039749	SK1T00039749-RA	1533	--	XP_015621523.1 uncharacterized protein LOC4325113 [Oryza sativa Japonica Group]	-	-	-	-	-	-	-	-
IP_peak_474	cluster1	3522755	3523295	541	3522960	36	2.23826	Promoter (1-2kb)	cluster1	3524914	3527254	2341	2	+	SK1G00039750	SK1T00039750-RA	-1954	--	EEC71961.1 hypothetical protein OsI_04795 [Oryza sativa Indica Group]	-	-	-	-	GO:0016021//integral component of membrane	GO:0046923//ER retention sequence binding	GO:0006621//protein retention in ER lumen	-
IP_peak_475	cluster1	3527208	3527942	735	3527540	34	2.26783	Downstream (1-2kb)	cluster1	3524914	3527254	2341	2	+	SK1G00039750	SK1T00039750-RA	2626	--	EEC71961.1 hypothetical protein OsI_04795 [Oryza sativa Indica Group]	-	-	-	-	GO:0016021//integral component of membrane	GO:0046923//ER retention sequence binding	GO:0006621//protein retention in ER lumen	-
IP_peak_476	cluster1	3531425	3532184	760	3531908	40.5	2.66775	Promoter (<=1kb)	cluster1	3529172	3531292	2121	6	-	SK1G00039751	SK1T00039751-RA	-616	PLP2	XP_015624009.1 patatin-like protein 2 [Oryza sativa Japonica Group]	-	-	-	-	-	GO:0009030//thiamine-phosphate kinase activity	GO:0006629//lipid metabolic process;GO:0009228//thiamine biosynthetic process	-
IP_peak_477	cluster1	3540094	3540602	509	3540447	34	2.15501	Exon (SK1T00039753-RA/SK1G00039753, exon 5 of 19)	cluster1	3538530	3545223	6694	19	+	SK1G00039753	SK1T00039753-RA	1917	SRL2	XP_015621439.1 uncharacterized protein LOC4325109 [Oryza sativa Japonica Group]	-	-	-	-	-	GO:0070403//NAD+ binding	GO:0006631//fatty acid metabolic process;GO:0055114//oxidation-reduction process	-
IP_peak_479	cluster1	3564989	3565911	923	3565419	51	2.84807	Intron (SK1T00039754-RA/SK1G00039754, intron 1 of 13)	cluster1	3563569	3573181	9613	14	+	SK1G00039754	SK1T00039754-RA	1850	SYN4	AAP79440.1 cohesin-like protein [Oryza sativa Indica Group]	-	-	-	-	-	GO:0005515//protein binding	-	-
IP_peak_480	cluster1	3566983	3567855	873	3567696	39	2.42368	Intron (SK1T00039754-RA/SK1G00039754, intron 4 of 13)	cluster1	3563569	3573181	9613	14	+	SK1G00039754	SK1T00039754-RA	4127	SYN4	AAP79440.1 cohesin-like protein [Oryza sativa Indica Group]	-	-	-	-	-	GO:0005515//protein binding	-	-
IP_peak_483	cluster1	3587942	3588352	411	3588221	35.5	2.40832	3' UTR	cluster1	3585500	3585682	183	1	+	SK1G00039756	SK1T00039756-RA	2721	--	KAB8085834.1 hypothetical protein EE612_008830, partial [Oryza sativa]	-	-	-	-	-	-	-	-
IP_peak_484	cluster1	3588982	3589708	727	3589261	45	3.21643	5' UTR	cluster1	3585500	3585682	183	1	+	SK1G00039756	SK1T00039756-RA	3761	--	KAB8085834.1 hypothetical protein EE612_008830, partial [Oryza sativa]	-	-	-	-	-	-	-	-
IP_peak_485	cluster1	3590656	3591304	649	3591014	40.5	2.37973	Intron (SK1T00039757-RA/SK1G00039757, intron 7 of 13)	cluster1	3587689	3593371	5683	14	-	SK1G00039757	SK1T00039757-RA	2357	BGLU4	XP_015650173.1 beta-glucosidase 4 isoform X2 [Oryza sativa Japonica Group]	Metabolism;Metabolism;Metabolism;Metabolism;Metabolism	Global and overview maps;Global and overview maps;Biosynthesis of other secondary metabolites;Carbohydrate metabolism;Metabolism of other amino acids	ko01100//Metabolic pathways;ko01110//Biosynthesis of secondary metabolites;ko00940//Phenylpropanoid biosynthesis;ko00500//Starch and sucrose metabolism;ko00460//Cyanoamino acid metabolism	K01188;K01188;K01188;K01188;K01188	GO:0009341//beta-galactosidase complex	GO:0004553//hydrolase activity, hydrolyzing O-glycosyl compounds;GO:0004565//beta-galactosidase activity	GO:0005975//carbohydrate metabolic process;GO:0006012//galactose metabolic process;GO:0071704//organic substance metabolic process	-
IP_peak_486	cluster1	3592021	3592957	937	3592343	39.5	2.81711	5' UTR	cluster1	3587689	3593371	5683	14	-	SK1G00039757	SK1T00039757-RA	1028	BGLU4	XP_015650173.1 beta-glucosidase 4 isoform X2 [Oryza sativa Japonica Group]	Metabolism;Metabolism;Metabolism;Metabolism;Metabolism	Global and overview maps;Global and overview maps;Biosynthesis of other secondary metabolites;Carbohydrate metabolism;Metabolism of other amino acids	ko01100//Metabolic pathways;ko01110//Biosynthesis of secondary metabolites;ko00940//Phenylpropanoid biosynthesis;ko00500//Starch and sucrose metabolism;ko00460//Cyanoamino acid metabolism	K01188;K01188;K01188;K01188;K01188	GO:0009341//beta-galactosidase complex	GO:0004553//hydrolase activity, hydrolyzing O-glycosyl compounds;GO:0004565//beta-galactosidase activity	GO:0005975//carbohydrate metabolic process;GO:0006012//galactose metabolic process;GO:0071704//organic substance metabolic process	-
IP_peak_487	cluster1	3601767	3603156	1390	3602531	39.3333333333333	2.63266	Intron (SK1T00039759-RA/SK1G00039759, intron 5 of 15)	cluster1	3600971	3607563	6593	16	+	SK1G00039759	SK1T00039759-RA	1560	RNS2	XP_015650189.1 ribonuclease 2 [Oryza sativa Japonica Group]	-	-	-	-	GO:0005576//extracellular region	GO:0003723//RNA binding;GO:0033897//ribonuclease T2 activity	GO:0008219//cell death;GO:0009405//pathogenesis	-
IP_peak_488	cluster1	3606582	3607356	775	3606843	36.5	2.4399	Intron (SK1T00039759-RA/SK1G00039759, intron 14 of 15)	cluster1	3600971	3607563	6593	16	+	SK1G00039759	SK1T00039759-RA	5872	RNS2	XP_015650189.1 ribonuclease 2 [Oryza sativa Japonica Group]	-	-	-	-	GO:0005576//extracellular region	GO:0003723//RNA binding;GO:0033897//ribonuclease T2 activity	GO:0008219//cell death;GO:0009405//pathogenesis	-
IP_peak_489	cluster1	3608250	3608953	704	3608354	38.5	2.39753	Intron (SK1T00039760-RA/SK1G00039760, intron 4 of 4)	cluster1	3607919	3614409	6491	5	-	SK1G00039760	SK1T00039760-RA	6055	--	EAY76822.1 hypothetical protein OsI_04782 [Oryza sativa Indica Group]	-	-	-	-	-	-	GO:0006367//transcription initiation from RNA polymerase II promoter	-
IP_peak_490	cluster1	3610033	3610612	580	3610462	36.5	2.22477	Intron (SK1T00039760-RA/SK1G00039760, intron 3 of 4)	cluster1	3607919	3614409	6491	5	-	SK1G00039760	SK1T00039760-RA	3947	--	EAY76822.1 hypothetical protein OsI_04782 [Oryza sativa Indica Group]	-	-	-	-	-	-	GO:0006367//transcription initiation from RNA polymerase II promoter	-
IP_peak_491	cluster1	3619020	3620410	1391	3619434	31	2.31123	Downstream (2-3kb)	cluster1	3607919	3614409	6491	5	-	SK1G00039760	SK1T00039760-RA	-5025	--	EAY76822.1 hypothetical protein OsI_04782 [Oryza sativa Indica Group]	-	-	-	-	-	-	GO:0006367//transcription initiation from RNA polymerase II promoter	-
IP_peak_492	cluster1	3620290	3621438	1149	3621283	38	2.40418	Downstream (<1kb)	cluster1	3607919	3614409	6491	5	-	SK1G00039760	SK1T00039760-RA	-6874	--	EAY76822.1 hypothetical protein OsI_04782 [Oryza sativa Indica Group]	-	-	-	-	-	-	GO:0006367//transcription initiation from RNA polymerase II promoter	-
IP_peak_493	cluster1	3626985	3627466	482	3627264	45	2.94549	Intron (SK1T00039762-RA/SK1G00039762, intron 6 of 8)	cluster1	3621785	3630144	8360	9	-	SK1G00039762	SK1T00039762-RA	2880	RPL5B	XP_015614983.1 60S ribosomal protein L5-2 [Oryza sativa Japonica Group]	Genetic Information Processing	Translation	ko03010//Ribosome	K02932	GO:0005840//ribosome	GO:0003735//structural constituent of ribosome;GO:0008097//5S rRNA binding	GO:0006412//translation	-
IP_peak_494	cluster1	3640249	3640969	721	3640776	29	2.04608	Intron (SK1T00039765-RA/SK1G00039765, intron 8 of 12)	cluster1	3638808	3645343	6536	13	-	SK1G00039765	SK1T00039765-RA	4567	FSM	EEC71951.1 hypothetical protein OsI_04775 [Oryza sativa Indica Group]	-	-	-	-	-	-	-	-
IP_peak_495	cluster1	3641304	3641990	687	3641722	66	4.9068	Exon (SK1T00039765-RA/SK1G00039765, exon 6 of 13)	cluster1	3638808	3645343	6536	13	-	SK1G00039765	SK1T00039765-RA	3621	FSM	EEC71951.1 hypothetical protein OsI_04775 [Oryza sativa Indica Group]	-	-	-	-	-	-	-	-
IP_peak_496	cluster1	3663510	3664281	772	3663656	45	2.87643	Intron (SK1T00039768-RA/SK1G00039768, intron 1 of 13)	cluster1	3663077	3667331	4255	14	+	SK1G00039768	SK1T00039768-RA	579	CRT3	XP_015620841.1 calreticulin-3 [Oryza sativa Japonica Group]	Genetic Information Processing;Cellular Processes	Folding, sorting and degradation;Transport and catabolism	ko04141//Protein processing in endoplasmic reticulum;ko04145//Phagosome	K08057;K08057	GO:0005783//endoplasmic reticulum	GO:0005509//calcium ion binding;GO:0051082//unfolded protein binding	GO:0006457//protein folding	-
IP_peak_497	cluster1	3665762	3666607	846	3666390	42.5	2.60924	Intron (SK1T00039768-RA/SK1G00039768, intron 12 of 13)	cluster1	3663077	3667331	4255	14	+	SK1G00039768	SK1T00039768-RA	3313	CRT3	XP_015620841.1 calreticulin-3 [Oryza sativa Japonica Group]	Genetic Information Processing;Cellular Processes	Folding, sorting and degradation;Transport and catabolism	ko04141//Protein processing in endoplasmic reticulum;ko04145//Phagosome	K08057;K08057	GO:0005783//endoplasmic reticulum	GO:0005509//calcium ion binding;GO:0051082//unfolded protein binding	GO:0006457//protein folding	-
IP_peak_498	cluster1	3675540	3675922	383	3675700	98	5.30491	Intron (SK1T00039770-RA/SK1G00039770, intron 3 of 4)	cluster1	3671145	3681489	10345	5	-	SK1G00039770	SK1T00039770-RA	5789	At3g07570	OEL21176.1 Cytochrome b561 and DOMON domain-containing protein [Dichanthelium oligosanthes]	-	-	-	-	-	-	-	-
IP_peak_499	cluster1	3686298	3686892	595	3686586	38	2.29676	Promoter (1-2kb)	cluster1	3688064	3688285	222	1	+	SK1G00000507	SK1T00000507-RA	-1478	--	-	-	-	-	-	-	-	-	-
IP_peak_500	cluster1	3693821	3694425	605	3694209	41	2.67814	Promoter (<=1kb)	cluster1	3694963	3697058	2096	8	+	SK1G00039772	SK1T00039772-RA	-754	--	XP_015632051.1 uncharacterized protein LOC4324965 isoform X3 [Oryza sativa Japonica Group]	-	-	-	-	GO:0005854//nascent polypeptide-associated complex	GO:0003755//peptidyl-prolyl cis-trans isomerase activity;GO:0051082//unfolded protein binding	GO:0006457//protein folding;GO:0015031//protein transport;GO:0051083//'de novo' cotranslational protein folding	-
IP_peak_501	cluster1	3695991	3696686	696	3696287	77.5	5.27574	Intron (SK1T00039772-RA/SK1G00039772, intron 6 of 7)	cluster1	3694963	3697058	2096	8	+	SK1G00039772	SK1T00039772-RA	1324	--	XP_015632051.1 uncharacterized protein LOC4324965 isoform X3 [Oryza sativa Japonica Group]	-	-	-	-	GO:0005854//nascent polypeptide-associated complex	GO:0003755//peptidyl-prolyl cis-trans isomerase activity;GO:0051082//unfolded protein binding	GO:0006457//protein folding;GO:0015031//protein transport;GO:0051083//'de novo' cotranslational protein folding	-
IP_peak_503	cluster1	3702214	3702764	551	3702647	48.5	2.86642	Exon (SK1T00039774-RA/SK1G00039774, exon 6 of 7)	cluster1	3700263	3703788	3526	7	+	SK1G00039774	SK1T00039774-RA	2384	--	KAF2953774.1 hypothetical protein DAI22_01g432000 [Oryza sativa Japonica Group]	-	-	-	-	-	GO:0003677//DNA binding;GO:0008270//zinc ion binding	-	-
IP_peak_504	cluster1	3704930	3705351	422	3705112	39	2.41918	Intron (SK1T00039775-RA/SK1G00039775, intron 2 of 3)	cluster1	3704085	3706503	2419	4	-	SK1G00039775	SK1T00039775-RA	1391	--	EAY76805.1 hypothetical protein OsI_04763 [Oryza sativa Indica Group]	-	-	-	-	-	-	-	-
IP_peak_505	cluster1	3708046	3708453	408	3708354	55.5	3.01719	Promoter (1-2kb)	cluster1	3710196	3712358	2163	4	+	SK1G00039776	SK1T00039776-RA	-1842	FRK1	A2WXV8.1 RecName: Full=Fructokinase-1; AltName: Full=Fructokinase I; AltName: Full=OsFKI [Oryza sativa Indica Group]	Metabolism;Metabolism;Metabolism;Metabolism;Metabolism	Global and overview maps;Global and overview maps;Carbohydrate metabolism;Carbohydrate metabolism;Carbohydrate metabolism	ko01100//Metabolic pathways;ko01110//Biosynthesis of secondary metabolites;ko00500//Starch and sucrose metabolism;ko00520//Amino sugar and nucleotide sugar metabolism;ko00051//Fructose and mannose metabolism	K00847;K00847;K00847;K00847;K00847	-	GO:0004747//ribokinase activity;GO:0008662//1-phosphofructokinase activity;GO:0016773//phosphotransferase activity, alcohol group as acceptor;GO:0047590//5-dehydro-2-deoxygluconokinase activity	GO:0009244//lipopolysaccharide core region biosynthetic process;GO:0019303//D-ribose catabolic process;GO:0019310//inositol catabolic process	-
IP_peak_506	cluster1	3720720	3721064	345	3720884	44	2.91771	Exon (SK1T00039777-RA/SK1G00039777, exon 3 of 4)	cluster1	3719162	3722979	3818	4	-	SK1G00039777	SK1T00039777-RA	2095	At3g03305	EAY76803.1 hypothetical protein OsI_04761 [Oryza sativa Indica Group]	-	-	-	-	-	GO:0016787//hydrolase activity;GO:0036094//small molecule binding	-	-
IP_peak_509	cluster1	3742072	3742716	645	3742212	35.5	2.40666	Promoter (<=1kb)	cluster1	3738617	3741459	2843	6	-	SK1G00039779	SK1T00039779-RA	-753	BT3	EEC71943.1 hypothetical protein OsI_04757 [Oryza sativa Indica Group]	-	-	-	-	-	GO:0005515//protein binding	-	-
IP_peak_511	cluster1	3783974	3784319	346	3784089	34.5	2.12874	Exon (SK1T00039781-RA/SK1G00039781, exon 21 of 37)	cluster1	3777290	3791928	14639	37	+	SK1G00039781	SK1T00039781-RA	6799	PAE5	OEL34529.1 Pectin acetylesterase 5 [Dichanthelium oligosanthes]	-	-	-	-	GO:0005789//endoplasmic reticulum membrane;GO:0009279//cell outer membrane	GO:0005515//protein binding;GO:0008236//serine-type peptidase activity;GO:0016787//hydrolase activity;GO:0022857//transmembrane transporter activity	GO:0006323//DNA packaging;GO:0006508//proteolysis;GO:0006629//lipid metabolic process;GO:0055085//transmembrane transport	-
IP_peak_512	cluster1	3785593	3786074	482	3785845	34	2.16304	Intron (SK1T00039781-RA/SK1G00039781, intron 25 of 36)	cluster1	3777290	3791928	14639	37	+	SK1G00039781	SK1T00039781-RA	8555	PAE5	OEL34529.1 Pectin acetylesterase 5 [Dichanthelium oligosanthes]	-	-	-	-	GO:0005789//endoplasmic reticulum membrane;GO:0009279//cell outer membrane	GO:0005515//protein binding;GO:0008236//serine-type peptidase activity;GO:0016787//hydrolase activity;GO:0022857//transmembrane transporter activity	GO:0006323//DNA packaging;GO:0006508//proteolysis;GO:0006629//lipid metabolic process;GO:0055085//transmembrane transport	-
IP_peak_513	cluster1	3790042	3790620	579	3790565	39	2.06684	Exon (SK1T00039781-RA/SK1G00039781, exon 34 of 37)	cluster1	3777290	3791928	14639	37	+	SK1G00039781	SK1T00039781-RA	13275	PAE5	OEL34529.1 Pectin acetylesterase 5 [Dichanthelium oligosanthes]	-	-	-	-	GO:0005789//endoplasmic reticulum membrane;GO:0009279//cell outer membrane	GO:0005515//protein binding;GO:0008236//serine-type peptidase activity;GO:0016787//hydrolase activity;GO:0022857//transmembrane transporter activity	GO:0006323//DNA packaging;GO:0006508//proteolysis;GO:0006629//lipid metabolic process;GO:0055085//transmembrane transport	-
IP_peak_514	cluster1	3805084	3805718	635	3805551	36.5	2.67332	Promoter (1-2kb)	cluster1	3807497	3809355	1859	2	+	SK1G00039783	SK1T00039783-RA	-1946	--	AAT77397.1 putative polyprotein [Oryza sativa Japonica Group]	-	-	-	-	-	-	-	-
IP_peak_515	cluster1	3826470	3826805	336	3826580	43	2.8353	Intron (SK1T00039784-RA/SK1G00039784, intron 2 of 4)	cluster1	3824529	3836174	11646	5	-	SK1G00039784	SK1T00039784-RA	9594	BIR2	XP_015621110.1 probably inactive leucine-rich repeat receptor-like protein kinase At5g48380 [Oryza sativa Japonica Group]	-	-	-	-	-	GO:0005515//protein binding	-	-
IP_peak_516	cluster1	3828097	3829040	944	3828241	39	2.14298	Intron (SK1T00039784-RA/SK1G00039784, intron 2 of 4)	cluster1	3824529	3836174	11646	5	-	SK1G00039784	SK1T00039784-RA	7933	BIR2	XP_015621110.1 probably inactive leucine-rich repeat receptor-like protein kinase At5g48380 [Oryza sativa Japonica Group]	-	-	-	-	-	GO:0005515//protein binding	-	-
IP_peak_517	cluster1	3849688	3850007	320	3849881	40.5	2.59216	Promoter (<=1kb)	cluster1	3847553	3849285	1733	3	-	SK1G00039787	SK1T00039787-RA	-596	At2g43860	BAB90184.1 putative polygalacturonase [Oryza sativa Japonica Group]	Metabolism;Metabolism	Global and overview maps;Carbohydrate metabolism	ko01100//Metabolic pathways;ko00040//Pentose and glucuronate interconversions	K01184;K01184	-	GO:0004650//polygalacturonase activity	GO:0005975//carbohydrate metabolic process;GO:0051186//cofactor metabolic process;GO:0071941//nitrogen cycle metabolic process	-
IP_peak_518	cluster1	3862316	3863141	826	3862479	42	2.77043	Promoter (<=1kb)	cluster1	3858565	3861983	3419	5	-	SK1G00039789	SK1T00039789-RA	-496	ZIP4	XP_015621103.2 TPR repeat-containing protein ZIP4 [Oryza sativa Japonica Group]	-	-	-	-	-	GO:0005515//protein binding	GO:0051321//meiotic cell cycle	-
IP_peak_520	cluster1	3879077	3879990	914	3879299	52.5	4.16768	Downstream (<1kb)	cluster1	3880085	3880973	889	2	-	SK1G00039792	SK1T00039792-RA	1674	--	EEC71934.1 hypothetical protein OsI_04742 [Oryza sativa Indica Group]	-	-	-	-	-	-	-	-
IP_peak_521	cluster1	3887273	3887973	701	3887758	40.5	2.60239	Downstream (<1kb)	cluster1	3888413	3889179	767	2	-	SK1G00039794	SK1T00039794-RA	1421	At2g19130	XP_015628041.1 G-type lectin S-receptor-like serine/threonine-protein kinase At2g19130 [Oryza sativa Japonica Group]	-	-	-	-	GO:0016021//integral component of membrane	GO:0004672//protein kinase activity;GO:0005524//ATP binding;GO:0016709//oxidoreductase activity, acting on paired donors, with incorporation or reduction of molecular oxygen, NAD(P)H as one donor, and incorporation of one atom of oxygen	GO:0006468//protein phosphorylation;GO:0006744//ubiquinone biosynthetic process;GO:0048544//recognition of pollen	-
IP_peak_522	cluster1	3890835	3891214	380	3891040	30	1.88369	Promoter (1-2kb)	cluster1	3888413	3889179	767	2	-	SK1G00039794	SK1T00039794-RA	-1861	At2g19130	XP_015628041.1 G-type lectin S-receptor-like serine/threonine-protein kinase At2g19130 [Oryza sativa Japonica Group]	-	-	-	-	GO:0016021//integral component of membrane	GO:0004672//protein kinase activity;GO:0005524//ATP binding;GO:0016709//oxidoreductase activity, acting on paired donors, with incorporation or reduction of molecular oxygen, NAD(P)H as one donor, and incorporation of one atom of oxygen	GO:0006468//protein phosphorylation;GO:0006744//ubiquinone biosynthetic process;GO:0048544//recognition of pollen	-
IP_peak_523	cluster1	3891613	3891973	361	3891830	36	2.31145	Intron (SK1T00039794-RB/SK1G00039794, intron 7 of 7)	cluster1	3889183	3901277	12095	8	-	SK1G00039794	SK1T00039794-RB	9447	At2g19130	XP_015628041.1 G-type lectin S-receptor-like serine/threonine-protein kinase At2g19130 [Oryza sativa Japonica Group]	-	-	-	-	GO:0016021//integral component of membrane	GO:0004672//protein kinase activity;GO:0005524//ATP binding;GO:0016709//oxidoreductase activity, acting on paired donors, with incorporation or reduction of molecular oxygen, NAD(P)H as one donor, and incorporation of one atom of oxygen	GO:0006468//protein phosphorylation;GO:0006744//ubiquinone biosynthetic process;GO:0048544//recognition of pollen	-
IP_peak_524	cluster1	3892727	3893805	1079	3893127	45.6666666666667	2.44344333333333	Exon (SK1T00039794-RB/SK1G00039794, exon 7 of 8)	cluster1	3889183	3901277	12095	8	-	SK1G00039794	SK1T00039794-RB	8150	At2g19130	XP_015628041.1 G-type lectin S-receptor-like serine/threonine-protein kinase At2g19130 [Oryza sativa Japonica Group]	-	-	-	-	GO:0016021//integral component of membrane	GO:0004672//protein kinase activity;GO:0005524//ATP binding;GO:0016709//oxidoreductase activity, acting on paired donors, with incorporation or reduction of molecular oxygen, NAD(P)H as one donor, and incorporation of one atom of oxygen	GO:0006468//protein phosphorylation;GO:0006744//ubiquinone biosynthetic process;GO:0048544//recognition of pollen	-
IP_peak_525	cluster1	3901395	3902444	1050	3902198	39.5	2.7083	Promoter (<=1kb)	cluster1	3889183	3901277	12095	8	-	SK1G00039794	SK1T00039794-RB	-921	At2g19130	XP_015628041.1 G-type lectin S-receptor-like serine/threonine-protein kinase At2g19130 [Oryza sativa Japonica Group]	-	-	-	-	GO:0016021//integral component of membrane	GO:0004672//protein kinase activity;GO:0005524//ATP binding;GO:0016709//oxidoreductase activity, acting on paired donors, with incorporation or reduction of molecular oxygen, NAD(P)H as one donor, and incorporation of one atom of oxygen	GO:0006468//protein phosphorylation;GO:0006744//ubiquinone biosynthetic process;GO:0048544//recognition of pollen	-
IP_peak_526	cluster1	3908073	3908804	732	3908580	39.5	2.51002	Intron (SK1T00039795-RA/SK1G00039795, intron 1 of 7)	cluster1	3907235	3916749	9515	8	+	SK1G00039795	SK1T00039795-RA	1345	At2g19130	EAY76778.1 hypothetical protein OsI_04734 [Oryza sativa Indica Group]	-	-	-	-	GO:0005887//integral component of plasma membrane	GO:0004672//protein kinase activity;GO:0005524//ATP binding	GO:0006468//protein phosphorylation;GO:0048544//recognition of pollen	-
IP_peak_527	cluster1	3914202	3915199	998	3914703	39	2.6497	Intron (SK1T00039795-RA/SK1G00039795, intron 5 of 7)	cluster1	3907235	3916749	9515	8	+	SK1G00039795	SK1T00039795-RA	7468	At2g19130	EAY76778.1 hypothetical protein OsI_04734 [Oryza sativa Indica Group]	-	-	-	-	GO:0005887//integral component of plasma membrane	GO:0004672//protein kinase activity;GO:0005524//ATP binding	GO:0006468//protein phosphorylation;GO:0048544//recognition of pollen	-
IP_peak_528	cluster1	3920402	3920727	326	3920509	33.5	2.39114	Downstream (1-2kb)	cluster1	3922001	3922915	915	2	-	SK1G00039796	SK1T00039796-RA	2406	LBD6	ABU44494.1 LOB domain protein 6 [Oryza sativa Japonica Group]	-	-	-	-	GO:0015627//type II protein secretion system complex	-	GO:0015628//protein secretion by the type II secretion system	LBD
IP_peak_529	cluster1	3923829	3924228	400	3924001	37.5	2.48568	Promoter (1-2kb)	cluster1	3922001	3922915	915	2	-	SK1G00039796	SK1T00039796-RA	-1086	LBD6	ABU44494.1 LOB domain protein 6 [Oryza sativa Japonica Group]	-	-	-	-	GO:0015627//type II protein secretion system complex	-	GO:0015628//protein secretion by the type II secretion system	LBD
IP_peak_530	cluster1	3953647	3954291	645	3953945	48	2.89857	Promoter (<=1kb)	cluster1	3954429	3954758	330	1	+	SK1G00039800	SK1T00039800-RA	-484	--	XP_015630051.1 uncharacterized protein LOC4324903 [Oryza sativa Japonica Group]	-	-	-	-	-	-	-	-
IP_peak_531	cluster1	3961027	3961663	637	3961461	52	3.34869	Downstream (1-2kb)	cluster1	3962580	3963023	444	1	-	SK1G00039802	SK1T00039802-RA	1562	--	XP_015642462.1 protein AUXIN-REGULATED GENE INVOLVED IN ORGAN SIZE [Oryza sativa Japonica Group]	-	-	-	-	-	-	-	-
IP_peak_532	cluster1	3975953	3976528	576	3976076	40.5	2.62179	Intron (SK1T00039805-RA/SK1G00039805, intron 1 of 3)	cluster1	3975549	3981893	6345	4	+	SK1G00039805	SK1T00039805-RA	527	At1g74260	XP_015617627.1 probable phosphoribosylformylglycinamidine synthase, chloroplastic/mitochondrial [Oryza sativa Japonica Group]	Metabolism;Metabolism;Metabolism	Global and overview maps;Global and overview maps;Nucleotide metabolism	ko01100//Metabolic pathways;ko01110//Biosynthesis of secondary metabolites;ko00230//Purine metabolism	K01952;K01952;K01952	-	GO:0003824//catalytic activity;GO:0004642//phosphoribosylformylglycinamidine synthase activity	GO:0006189//'de novo' IMP biosynthetic process;GO:0009058//biosynthetic process;GO:0009152//purine ribonucleotide biosynthetic process;GO:0015948//methanogenesis	-
IP_peak_533	cluster1	3981757	3982028	272	3981888	43	2.67765	3' UTR	cluster1	3975549	3981893	6345	4	+	SK1G00039805	SK1T00039805-RA	6339	At1g74260	XP_015617627.1 probable phosphoribosylformylglycinamidine synthase, chloroplastic/mitochondrial [Oryza sativa Japonica Group]	Metabolism;Metabolism;Metabolism	Global and overview maps;Global and overview maps;Nucleotide metabolism	ko01100//Metabolic pathways;ko01110//Biosynthesis of secondary metabolites;ko00230//Purine metabolism	K01952;K01952;K01952	-	GO:0003824//catalytic activity;GO:0004642//phosphoribosylformylglycinamidine synthase activity	GO:0006189//'de novo' IMP biosynthetic process;GO:0009058//biosynthetic process;GO:0009152//purine ribonucleotide biosynthetic process;GO:0015948//methanogenesis	-
IP_peak_534	cluster1	3984664	3985503	840	3984846	43	2.84874	Downstream (1-2kb)	cluster1	3986551	3988939	2389	3	-	SK1G00039806	SK1T00039806-RA	4093	NAC035	XP_015631974.1 NAC domain-containing protein 35 [Oryza sativa Japonica Group]	-	-	-	-	-	GO:0003677//DNA binding	GO:0006355//regulation of transcription, DNA-templated	NAC
IP_peak_535	cluster1	3989409	3989793	385	3989515	39	2.2279	Promoter (<=1kb)	cluster1	3986551	3988939	2389	3	-	SK1G00039806	SK1T00039806-RA	-576	NAC035	XP_015631974.1 NAC domain-containing protein 35 [Oryza sativa Japonica Group]	-	-	-	-	-	GO:0003677//DNA binding	GO:0006355//regulation of transcription, DNA-templated	NAC
IP_peak_539	cluster1	4032541	4034448	1908	4033459	45.6666666666667	3.12338666666667	Intron (SK1T00039808-RA/SK1G00039808, intron 3 of 4)	cluster1	4029449	4034210	4762	5	+	SK1G00039808	SK1T00039808-RA	4010	OsI_04717	A2WXR5.1 RecName: Full=PHD finger protein ALFIN-LIKE 6 [Oryza sativa Indica Group]	-	-	-	-	-	GO:0042393//histone binding	GO:0006355//regulation of transcription, DNA-templated	-
IP_peak_540	cluster1	4036792	4037325	534	4037214	35.5	1.95019	Promoter (<=1kb)	cluster1	4036591	4036977	387	2	-	SK1G00039809	SK1T00039809-RA	-237	--	BAF14960.1 Os04g0469700 [Oryza sativa Japonica Group]	-	-	-	-	-	-	-	-
IP_peak_541	cluster1	4037865	4038840	976	4038627	46	3.12215	Promoter (1-2kb)	cluster1	4036591	4036977	387	2	-	SK1G00039809	SK1T00039809-RA	-1650	--	BAF14960.1 Os04g0469700 [Oryza sativa Japonica Group]	-	-	-	-	-	-	-	-
IP_peak_542	cluster1	4042992	4043378	387	4043217	44	2.70014	Intron (SK1T00039810-RA/SK1G00039810, intron 2 of 5)	cluster1	4041910	4049388	7479	6	+	SK1G00039810	SK1T00039810-RA	1307	prfB	XP_015627980.1 uncharacterized protein LOC9268172 [Oryza sativa Japonica Group]	-	-	-	-	-	GO:0003677//DNA binding;GO:0003700//transcription factor activity, sequence-specific DNA binding;GO:0003747//translation release factor activity;GO:0043565//sequence-specific DNA binding	GO:0006355//regulation of transcription, DNA-templated;GO:0006415//translational termination	-
IP_peak_543	cluster1	4047233	4047749	517	4047394	42	2.51309	Intron (SK1T00039810-RA/SK1G00039810, intron 2 of 5)	cluster1	4041910	4049388	7479	6	+	SK1G00039810	SK1T00039810-RA	5484	prfB	XP_015627980.1 uncharacterized protein LOC9268172 [Oryza sativa Japonica Group]	-	-	-	-	-	GO:0003677//DNA binding;GO:0003700//transcription factor activity, sequence-specific DNA binding;GO:0003747//translation release factor activity;GO:0043565//sequence-specific DNA binding	GO:0006355//regulation of transcription, DNA-templated;GO:0006415//translational termination	-
IP_peak_544	cluster1	4049173	4050166	994	4049606	35	2.46801	Intron (SK1T00039811-RA/SK1G00039811, intron 9 of 12)	cluster1	4048334	4052117	3784	13	-	SK1G00039811	SK1T00039811-RA	2511	ISPD	XP_015625415.1 2-C-methyl-D-erythritol 4-phosphate cytidylyltransferase, chloroplastic isoform X1 [Oryza sativa Japonica Group]	Metabolism;Metabolism;Metabolism	Global and overview maps;Global and overview maps;Metabolism of terpenoids and polyketides	ko01100//Metabolic pathways;ko01110//Biosynthesis of secondary metabolites;ko00900//Terpenoid backbone biosynthesis	K00991;K00991;K00991	GO:0005737//cytoplasm	GO:0003977//UDP-N-acetylglucosamine diphosphorylase activity;GO:0005525//GTP binding;GO:0008879//glucose-1-phosphate thymidylyltransferase activity;GO:0016779//nucleotidyltransferase activity;GO:0019134//glucosamine-1-phosphate N-acetyltransferase activity;GO:0050518//2-C-methyl-D-erythritol 4-phosphate cytidylyltransferase activity;GO:0070567//cytidylyltransferase activity;GO:0070568//guanylyltr…	GO:0000271//polysaccharide biosynthetic process;GO:0006777//Mo-molybdopterin cofactor biosynthetic process;GO:0009058//biosynthetic process;GO:0009103//lipopolysaccharide biosynthetic process;GO:0009252//peptidoglycan biosynthetic process;GO:0019288//isopentenyl diphosphate biosynthetic process, methylerythritol 4-phosphate pathway;GO:0032324//molybdopterin cofactor biosynthetic process	-
IP_peak_545	cluster1	4056448	4057508	1061	4056852	42	2.26965	Intron (SK1T00039813-RA/SK1G00039813, intron 7 of 13)	cluster1	4054431	4060055	5625	14	-	SK1G00039813	SK1T00039813-RA	3203	--	BAD82128.1 unknown protein [Oryza sativa Japonica Group]	-	-	-	-	-	-	-	-
IP_peak_546	cluster1	4058823	4059359	537	4059074	53.5	2.94598	Intron (SK1T00039813-RA/SK1G00039813, intron 2 of 13)	cluster1	4054431	4060055	5625	14	-	SK1G00039813	SK1T00039813-RA	981	--	BAD82128.1 unknown protein [Oryza sativa Japonica Group]	-	-	-	-	-	-	-	-
IP_peak_547	cluster1	4083676	4084967	1292	4083819	43	2.49333	Intron (SK1T00039816-RA/SK1G00039816, intron 2 of 6)	cluster1	4080548	4084760	4213	7	-	SK1G00039816	SK1T00039816-RA	941	SPIN1	XP_015621181.1 KH domain-containing protein At1g09660/At1g09670 [Oryza sativa Japonica Group]	-	-	-	-	-	GO:0003723//RNA binding	-	-
IP_peak_548	cluster1	4096165	4096824	660	4096331	36	2.08751	Exon (SK1T00039818-RA/SK1G00039818, exon 3 of 7)	cluster1	4095069	4097883	2815	7	-	SK1G00039818	SK1T00039818-RA	1552	MADS21	XP_015621182.1 MADS-box transcription factor 21 [Oryza sativa Japonica Group]	-	-	-	-	GO:0005634//nucleus	GO:0003677//DNA binding;GO:0003700//transcription factor activity, sequence-specific DNA binding;GO:0046983//protein dimerization activity	GO:0006355//regulation of transcription, DNA-templated	MIKC
IP_peak_549	cluster1	4106019	4106495	477	4106198	51.5	2.52906	Intron (SK1T00039819-RA/SK1G00039819, intron 1 of 2)	cluster1	4105648	4108215	2568	3	+	SK1G00039819	SK1T00039819-RA	550	--	EAY76749.1 hypothetical protein OsI_04705 [Oryza sativa Indica Group]	-	-	-	-	-	-	-	-
IP_peak_550	cluster1	4106983	4107243	261	4107140	36.5	2.49951	Intron (SK1T00039819-RA/SK1G00039819, intron 2 of 2)	cluster1	4105648	4108215	2568	3	+	SK1G00039819	SK1T00039819-RA	1492	--	EAY76749.1 hypothetical protein OsI_04705 [Oryza sativa Indica Group]	-	-	-	-	-	-	-	-
IP_peak_551	cluster1	4124874	4125226	353	4125017	37.5	2.57147	Intron (SK1T00039823-RA/SK1G00039823, intron 2 of 2)	cluster1	4123137	4125948	2812	3	+	SK1G00039823	SK1T00039823-RA	1880	--	XP_015625247.1 uncharacterized protein LOC107276097 [Oryza sativa Japonica Group]	-	-	-	-	-	-	-	-
IP_peak_553	cluster1	4135498	4137705	2208	4136952	43	2.68358333333333	Intron (SK1T00039824-RA/SK1G00039824, intron 2 of 9)	cluster1	4134685	4140394	5710	10	+	SK1G00039824	SK1T00039824-RA	2267	--	XP_015622357.1 protein WVD2-like 7 [Oryza sativa Japonica Group]	-	-	-	-	-	-	-	-
IP_peak_554	cluster1	4145037	4145396	360	4145214	45.5	2.48528	Intron (SK1T00039825-RA/SK1G00039825, intron 1 of 1)	cluster1	4144372	4146790	2419	2	+	SK1G00039825	SK1T00039825-RA	842	--	XP_015621278.1 uncharacterized protein LOC4324881 [Oryza sativa Japonica Group]	-	-	-	-	-	-	-	-
IP_peak_555	cluster1	4146143	4146497	355	4146263	37.5	2.34402	Exon (SK1T00039825-RA/SK1G00039825, exon 2 of 2)	cluster1	4144372	4146790	2419	2	+	SK1G00039825	SK1T00039825-RA	1891	--	XP_015621278.1 uncharacterized protein LOC4324881 [Oryza sativa Japonica Group]	-	-	-	-	-	-	-	-
IP_peak_556	cluster1	4147734	4148424	691	4147970	43.5	2.49058	Downstream (1-2kb)	cluster1	4144372	4146790	2419	2	+	SK1G00039825	SK1T00039825-RA	3598	--	XP_015621278.1 uncharacterized protein LOC4324881 [Oryza sativa Japonica Group]	-	-	-	-	-	-	-	-
IP_peak_559	cluster1	4184013	4184496	484	4184384	30	1.99202	Intron (SK1T00039830-RA/SK1G00039830, intron 2 of 17)	cluster1	4183483	4195035	11553	18	+	SK1G00039830	SK1T00039830-RA	901	At5g08430	EEC71912.1 hypothetical protein OsI_04692 [Oryza sativa Indica Group]	-	-	-	-	-	GO:0003677//DNA binding;GO:0005515//protein binding	-	-
IP_peak_560	cluster1	4184867	4185461	595	4185195	126	6.66191	Intron (SK1T00039830-RA/SK1G00039830, intron 3 of 17)	cluster1	4183483	4195035	11553	18	+	SK1G00039830	SK1T00039830-RA	1712	At5g08430	EEC71912.1 hypothetical protein OsI_04692 [Oryza sativa Indica Group]	-	-	-	-	-	GO:0003677//DNA binding;GO:0005515//protein binding	-	-
IP_peak_561	cluster1	4187422	4187984	563	4187860	31	2.23411	Intron (SK1T00039830-RA/SK1G00039830, intron 6 of 17)	cluster1	4183483	4195035	11553	18	+	SK1G00039830	SK1T00039830-RA	4377	At5g08430	EEC71912.1 hypothetical protein OsI_04692 [Oryza sativa Indica Group]	-	-	-	-	-	GO:0003677//DNA binding;GO:0005515//protein binding	-	-
IP_peak_562	cluster1	4190033	4190479	447	4190288	37	2.82783	Intron (SK1T00039830-RA/SK1G00039830, intron 9 of 17)	cluster1	4183483	4195035	11553	18	+	SK1G00039830	SK1T00039830-RA	6805	At5g08430	EEC71912.1 hypothetical protein OsI_04692 [Oryza sativa Indica Group]	-	-	-	-	-	GO:0003677//DNA binding;GO:0005515//protein binding	-	-
IP_peak_563	cluster1	4194701	4195357	657	4195253	41	2.39438	3' UTR	cluster1	4195121	4198942	3822	5	-	SK1G00039831	SK1T00039831-RA	3689	PUB4	EEC71911.1 hypothetical protein OsI_04691 [Oryza sativa Indica Group]	-	-	-	-	-	GO:0004842//ubiquitin-protein transferase activity;GO:0005515//protein binding	GO:0016567//protein ubiquitination	-
IP_peak_565	cluster1	4218448	4218857	410	4218694	37	2.21195	Intron (SK1T00039833-RA/SK1G00039833, intron 3 of 8)	cluster1	4216600	4222114	5515	9	+	SK1G00039833	SK1T00039833-RA	2094	At5g64030	EAY76734.1 hypothetical protein OsI_04689 [Oryza sativa Indica Group]	-	-	-	-	-	GO:0008168//methyltransferase activity	-	-
IP_peak_566	cluster1	4220980	4221744	765	4221528	48.5	2.67823	Exon (SK1T00039833-RA/SK1G00039833, exon 9 of 9)	cluster1	4216600	4222114	5515	9	+	SK1G00039833	SK1T00039833-RA	4928	At5g64030	EAY76734.1 hypothetical protein OsI_04689 [Oryza sativa Indica Group]	-	-	-	-	-	GO:0008168//methyltransferase activity	-	-
IP_peak_568	cluster1	4259997	4261040	1044	4260460	42.5	2.59497	Downstream (1-2kb)	cluster1	4261912	4268080	6169	13	-	SK1G00039836	SK1T00039836-RA	7620	UBN1	EEC71910.1 hypothetical protein OsI_04685 [Oryza sativa Indica Group]	-	-	-	-	-	-	-	-
IP_peak_569	cluster1	4261795	4263430	1636	4262743	49	2.9939	Intron (SK1T00039836-RA/SK1G00039836, intron 11 of 12)	cluster1	4261912	4268080	6169	13	-	SK1G00039836	SK1T00039836-RA	5337	UBN1	EEC71910.1 hypothetical protein OsI_04685 [Oryza sativa Indica Group]	-	-	-	-	-	-	-	-
IP_peak_570	cluster1	4265873	4266474	602	4266024	38.5	2.29838	Intron (SK1T00039836-RA/SK1G00039836, intron 4 of 12)	cluster1	4261912	4268080	6169	13	-	SK1G00039836	SK1T00039836-RA	2056	UBN1	EEC71910.1 hypothetical protein OsI_04685 [Oryza sativa Indica Group]	-	-	-	-	-	-	-	-
IP_peak_571	cluster1	4266766	4267078	313	4266933	34.5	2.2603	Intron (SK1T00039836-RA/SK1G00039836, intron 3 of 12)	cluster1	4261912	4268080	6169	13	-	SK1G00039836	SK1T00039836-RA	1147	UBN1	EEC71910.1 hypothetical protein OsI_04685 [Oryza sativa Indica Group]	-	-	-	-	-	-	-	-
IP_peak_572	cluster1	4267331	4267671	341	4267512	41	3.04435	Intron (SK1T00039836-RA/SK1G00039836, intron 1 of 12)	cluster1	4261912	4268080	6169	13	-	SK1G00039836	SK1T00039836-RA	568	UBN1	EEC71910.1 hypothetical protein OsI_04685 [Oryza sativa Indica Group]	-	-	-	-	-	-	-	-
IP_peak_573	cluster1	4274737	4275762	1026	4275296	39.3333333333333	2.68671666666667	Intron (SK1T00039837-RA/SK1G00039837, intron 1 of 1)	cluster1	4268788	4279222	10435	2	-	SK1G00039837	SK1T00039837-RA	3926	At1g11050	BAS75577.1 Os01g0883000 [Oryza sativa Japonica Group]	-	-	-	-	-	GO:0004672//protein kinase activity;GO:0005524//ATP binding	GO:0006468//protein phosphorylation	-
IP_peak_574	cluster1	4279978	4280329	352	4280199	34	2.64813	Promoter (<=1kb)	cluster1	4268788	4279222	10435	2	-	SK1G00039837	SK1T00039837-RA	-977	At1g11050	BAS75577.1 Os01g0883000 [Oryza sativa Japonica Group]	-	-	-	-	-	GO:0004672//protein kinase activity;GO:0005524//ATP binding	GO:0006468//protein phosphorylation	-
IP_peak_575	cluster1	4292751	4293269	519	4293023	39.5	2.05057	Intron (SK1T00039840-RA/SK1G00039840, intron 9 of 10)	cluster1	4291981	4298494	6514	11	-	SK1G00039840	SK1T00039840-RA	5471	At1g71900	EAZ14388.1 hypothetical protein OsJ_04308 [Oryza sativa Japonica Group]	-	-	-	-	GO:0016020//membrane;GO:0016021//integral component of membrane	GO:0015095//magnesium ion transmembrane transporter activity	GO:0015693//magnesium ion transport	-
IP_peak_576	cluster1	4296379	4297879	1501	4296957	39.6666666666667	2.20981333333333	Exon (SK1T00039840-RA/SK1G00039840, exon 4 of 11)	cluster1	4291981	4298494	6514	11	-	SK1G00039840	SK1T00039840-RA	1537	At1g71900	EAZ14388.1 hypothetical protein OsJ_04308 [Oryza sativa Japonica Group]	-	-	-	-	GO:0016020//membrane;GO:0016021//integral component of membrane	GO:0015095//magnesium ion transmembrane transporter activity	GO:0015693//magnesium ion transport	-
IP_peak_577	cluster1	4312547	4313313	767	4312754	39	2.51091	Exon (SK1T00039843-RA/SK1G00039843, exon 2 of 9)	cluster1	4311330	4315326	3997	9	+	SK1G00039843	SK1T00039843-RA	1424	PERK13	XP_015612124.1 inactive protein kinase SELMODRAFT_444075 isoform X1 [Oryza sativa Japonica Group]	-	-	-	-	-	GO:0004672//protein kinase activity;GO:0005524//ATP binding	GO:0006468//protein phosphorylation	-
IP_peak_578	cluster1	4314565	4315013	449	4314815	36	2.25083	Intron (SK1T00039843-RA/SK1G00039843, intron 7 of 8)	cluster1	4311330	4315326	3997	9	+	SK1G00039843	SK1T00039843-RA	3485	PERK13	XP_015612124.1 inactive protein kinase SELMODRAFT_444075 isoform X1 [Oryza sativa Japonica Group]	-	-	-	-	-	GO:0004672//protein kinase activity;GO:0005524//ATP binding	GO:0006468//protein phosphorylation	-
IP_peak_580	cluster1	4320084	4321023	940	4320327	38.5	2.33515	Intron (SK1T00039844-RA/SK1G00039844, intron 1 of 4)	cluster1	4319882	4323234	3353	5	+	SK1G00039844	SK1T00039844-RA	445	SKP2A	XP_015612144.1 F-box protein SKP2A [Oryza sativa Japonica Group]	Genetic Information Processing	Folding, sorting and degradation	ko04120//Ubiquitin mediated proteolysis	K03875	-	GO:0005515//protein binding	-	-
IP_peak_582	cluster1	4331769	4332968	1200	4332695	50	2.7125	Intron (SK1T00039847-RA/SK1G00039847, intron 1 of 3)	cluster1	4331257	4335109	3853	4	+	SK1G00039847	SK1T00039847-RA	1438	SCL1	XP_015610828.1 scarecrow-like protein 1 [Oryza sativa Japonica Group]	-	-	-	-	-	-	-	GRAS
IP_peak_583	cluster1	4334722	4335112	391	4334929	35	2.1493	3' UTR	cluster1	4331257	4335109	3853	4	+	SK1G00039847	SK1T00039847-RA	3672	SCL1	XP_015610828.1 scarecrow-like protein 1 [Oryza sativa Japonica Group]	-	-	-	-	-	-	-	GRAS
IP_peak_584	cluster1	4339241	4339499	259	4339334	62.5	3.27137	Promoter (<=1kb)	cluster1	4335225	4339042	3818	5	-	SK1G00039848	SK1T00039848-RA	-292	DCLRE1B	XP_015610818.1 5' exonuclease Apollo [Oryza sativa Japonica Group]	-	-	-	-	-	GO:0005198//structural molecule activity;GO:0008270//zinc ion binding;GO:0047922//gentisate 1,2-dioxygenase activity	GO:0006401//RNA catabolic process	-
IP_peak_587	cluster1	4362800	4363687	888	4363335	39.5	2.25102	Exon (SK1T00039851-RA/SK1G00039851, exon 11 of 22)	cluster1	4359759	4368169	8411	22	+	SK1G00039851	SK1T00039851-RA	3576	PKL	BAS75560.1 Os01g0881000 [Oryza sativa Japonica Group]	-	-	-	-	-	GO:0003676//nucleic acid binding;GO:0003677//DNA binding;GO:0005524//ATP binding;GO:0016787//hydrolase activity;GO:0042393//histone binding	-	-
IP_peak_588	cluster1	4364657	4365210	554	4365084	52	3.0145	Exon (SK1T00039851-RA/SK1G00039851, exon 16 of 22)	cluster1	4359759	4368169	8411	22	+	SK1G00039851	SK1T00039851-RA	5325	PKL	BAS75560.1 Os01g0881000 [Oryza sativa Japonica Group]	-	-	-	-	-	GO:0003676//nucleic acid binding;GO:0003677//DNA binding;GO:0005524//ATP binding;GO:0016787//hydrolase activity;GO:0042393//histone binding	-	-
IP_peak_589	cluster1	4381402	4382035	634	4381580	77	5.03688	Intron (SK1T00039856-RA/SK1G00039856, intron 1 of 4)	cluster1	4380362	4384287	3926	5	+	SK1G00039856	SK1T00039856-RA	1218	TBL7	EAY76708.1 hypothetical protein OsI_04663 [Oryza sativa Indica Group]	-	-	-	-	-	-	-	-
IP_peak_590	cluster1	4395745	4396055	311	4395877	48	2.80783	Intron (SK1T00039858-RA/SK1G00039858, intron 4 of 4)	cluster1	4394388	4399903	5516	5	-	SK1G00039858	SK1T00039858-RA	4026	GUX1	EEC71899.1 hypothetical protein OsI_04661 [Oryza sativa Indica Group]	-	-	-	-	-	GO:0016757//transferase activity, transferring glycosyl groups	-	-
IP_peak_591	cluster1	4401216	4401880	665	4401700	50	3.67727	Promoter (1-2kb)	cluster1	4394388	4399903	5516	5	-	SK1G00039858	SK1T00039858-RA	-1797	GUX1	EEC71899.1 hypothetical protein OsI_04661 [Oryza sativa Indica Group]	-	-	-	-	-	GO:0016757//transferase activity, transferring glycosyl groups	-	-
IP_peak_592	cluster1	4440922	4441420	499	4441111	27.5	2.22404	Intron (SK1T00039862-RA/SK1G00039862, intron 2 of 2)	cluster1	4439930	4441752	1823	3	-	SK1G00039862	SK1T00039862-RA	641	--	BAS75542.1 Os01g0879600 [Oryza sativa Japonica Group]	-	-	-	-	-	-	-	-
IP_peak_593	cluster1	4447366	4447767	402	4447571	38	2.38975	Intron (SK1T00039863-RA/SK1G00039863, intron 5 of 5)	cluster1	4446147	4448364	2218	6	+	SK1G00039863	SK1T00039863-RA	1424	--	EAY76703.1 hypothetical protein OsI_04658 [Oryza sativa Indica Group]	-	-	-	-	-	GO:0005515//protein binding	-	-
IP_peak_594	cluster1	4448217	4448554	338	4448356	31	2.14133	Exon (SK1T00039863-RA/SK1G00039863, exon 6 of 6)	cluster1	4446147	4448364	2218	6	+	SK1G00039863	SK1T00039863-RA	2209	--	EAY76703.1 hypothetical protein OsI_04658 [Oryza sativa Indica Group]	-	-	-	-	-	GO:0005515//protein binding	-	-
IP_peak_595	cluster1	4450604	4451547	944	4451356	178	12.0025	5' UTR	cluster1	4448908	4451748	2841	4	-	SK1G00039864	SK1T00039864-RA	392	--	XP_025878165.1 uncharacterized protein LOC4324837 isoform X2 [Oryza sativa Japonica Group]	-	-	-	-	-	GO:0004553//hydrolase activity, hydrolyzing O-glycosyl compounds	GO:0005975//carbohydrate metabolic process	-
IP_peak_596	cluster1	4472628	4473065	438	4472844	58.5	3.56712	Intron (SK1T00039869-RA/SK1G00039869, intron 1 of 3)	cluster1	4471752	4475959	4208	4	+	SK1G00039869	SK1T00039869-RA	1092	AAP5	EAY76697.1 hypothetical protein OsI_04651 [Oryza sativa Indica Group]	-	-	-	-	GO:0005887//integral component of plasma membrane	GO:0015173//aromatic amino acid transmembrane transporter activity	GO:0003333//amino acid transmembrane transport;GO:0015801//aromatic amino acid transport	-
IP_peak_598	cluster1	4486634	4487132	499	4486793	34	2.19367	Promoter (1-2kb)	cluster1	4488024	4490826	2803	6	+	SK1G00039870	SK1T00039870-RA	-1231	AAP6	EAY76696.1 hypothetical protein OsI_04649 [Oryza sativa Indica Group]	-	-	-	-	-	-	-	-
IP_peak_600	cluster1	4506066	4506528	463	4506312	35.5	2.43004	Promoter (<=1kb)	cluster1	4506321	4507386	1066	3	+	SK1G00039873	SK1T00039873-RA	-9	--	BAS75523.1 Os01g0878000, partial [Oryza sativa Japonica Group]	-	-	-	-	-	-	-	-
IP_peak_601	cluster1	4520946	4521929	984	4521335	166	10.9137	Downstream (1-2kb)	cluster1	4523235	4527677	4443	5	-	SK1G00039875	SK1T00039875-RA	6342	At1g33420	EAY76692.1 hypothetical protein OsI_04645 [Oryza sativa Indica Group]	-	-	-	-	-	-	-	-
IP_peak_602	cluster1	4539696	4540239	544	4539952	37.5	2.19784	Exon (SK1T00039876-RA/SK1G00039876, exon 14 of 23)	cluster1	4535967	4545986	10020	23	-	SK1G00039876	SK1T00039876-RA	6034	B3GALT8	XP_015690549.1 PREDICTED: mitotic spindle checkpoint protein MAD1-like [Oryza brachyantha]	-	-	-	-	GO:0016020//membrane	GO:0005524//ATP binding;GO:0016757//transferase activity, transferring glycosyl groups;GO:0016758//transferase activity, transferring hexosyl groups	GO:0006486//protein glycosylation;GO:0007059//chromosome segregation;GO:0007094//mitotic spindle assembly checkpoint;GO:0030261//chromosome condensation	-
IP_peak_603	cluster1	4542241	4542532	292	4542368	34.5	2.14656	Intron (SK1T00039876-RA/SK1G00039876, intron 8 of 22)	cluster1	4535967	4545986	10020	23	-	SK1G00039876	SK1T00039876-RA	3618	B3GALT8	XP_015690549.1 PREDICTED: mitotic spindle checkpoint protein MAD1-like [Oryza brachyantha]	-	-	-	-	GO:0016020//membrane	GO:0005524//ATP binding;GO:0016757//transferase activity, transferring glycosyl groups;GO:0016758//transferase activity, transferring hexosyl groups	GO:0006486//protein glycosylation;GO:0007059//chromosome segregation;GO:0007094//mitotic spindle assembly checkpoint;GO:0030261//chromosome condensation	-
IP_peak_604	cluster1	4542837	4543303	467	4543044	43.5	2.76284	Intron (SK1T00039876-RA/SK1G00039876, intron 6 of 22)	cluster1	4535967	4545986	10020	23	-	SK1G00039876	SK1T00039876-RA	2942	B3GALT8	XP_015690549.1 PREDICTED: mitotic spindle checkpoint protein MAD1-like [Oryza brachyantha]	-	-	-	-	GO:0016020//membrane	GO:0005524//ATP binding;GO:0016757//transferase activity, transferring glycosyl groups;GO:0016758//transferase activity, transferring hexosyl groups	GO:0006486//protein glycosylation;GO:0007059//chromosome segregation;GO:0007094//mitotic spindle assembly checkpoint;GO:0030261//chromosome condensation	-
IP_peak_605	cluster1	4543578	4544031	454	4543695	33	2.16239	Intron (SK1T00039876-RA/SK1G00039876, intron 6 of 22)	cluster1	4535967	4545986	10020	23	-	SK1G00039876	SK1T00039876-RA	2291	B3GALT8	XP_015690549.1 PREDICTED: mitotic spindle checkpoint protein MAD1-like [Oryza brachyantha]	-	-	-	-	GO:0016020//membrane	GO:0005524//ATP binding;GO:0016757//transferase activity, transferring glycosyl groups;GO:0016758//transferase activity, transferring hexosyl groups	GO:0006486//protein glycosylation;GO:0007059//chromosome segregation;GO:0007094//mitotic spindle assembly checkpoint;GO:0030261//chromosome condensation	-
IP_peak_606	cluster1	4548552	4548913	362	4548685	51.5	3.38752	Downstream (1-2kb)	cluster1	4548180	4548320	141	1	+	SK1G00039877	SK1T00039877-RA	505	--	-	-	-	-	-	-	-	-	-
IP_peak_607	cluster1	4554433	4555203	771	4554509	36	2.32418	Downstream (1-2kb)	cluster1	4552156	4554430	2275	4	+	SK1G00039879	SK1T00039879-RA	2353	RAD52-1	XP_015621221.1 DNA repair RAD52-like protein 1, mitochondrial [Oryza sativa Japonica Group]	-	-	-	-	GO:0030288//outer membrane-bounded periplasmic space	GO:0005215//transporter activity	GO:0006810//transport;GO:0009405//pathogenesis	-
IP_peak_608	cluster1	4558675	4559230	556	4558824	35.5	2.31007	Intron (SK1T00039880-RA/SK1G00039880, intron 4 of 5)	cluster1	4555599	4562001	6403	6	-	SK1G00039880	SK1T00039880-RA	3177	ARP1	XP_015621219.1 RNA-binding protein 24-B isoform X1 [Oryza sativa Japonica Group]	-	-	-	-	-	GO:0003676//nucleic acid binding	GO:0008380//RNA splicing	-
IP_peak_609	cluster1	4560567	4560856	290	4560648	33	1.98571	Intron (SK1T00039880-RA/SK1G00039880, intron 2 of 5)	cluster1	4555599	4562001	6403	6	-	SK1G00039880	SK1T00039880-RA	1353	ARP1	XP_015621219.1 RNA-binding protein 24-B isoform X1 [Oryza sativa Japonica Group]	-	-	-	-	-	GO:0003676//nucleic acid binding	GO:0008380//RNA splicing	-
IP_peak_610	cluster1	4586849	4587478	630	4587043	37.5	2.20038	Downstream (2-3kb)	cluster1	4589262	4589399	138	1	+	SK1G00039883	SK1T00039883-RA	-2219	--	BAS75511.1 Os01g0876650, partial [Oryza sativa Japonica Group]	-	-	-	-	-	-	-	-
IP_peak_611	cluster1	4594466	4595324	859	4595000	43	2.43471	Intron (SK1T00039884-RA/SK1G00039884, intron 1 of 3)	cluster1	4591342	4595640	4299	4	-	SK1G00039884	SK1T00039884-RA	640	SF3B4	XP_015621556.1 splicing factor 3B subunit 4 isoform X2 [Oryza sativa Japonica Group]	Genetic Information Processing	Transcription	ko03040//Spliceosome	K12831	-	GO:0003676//nucleic acid binding	GO:0008380//RNA splicing	-
IP_peak_612	cluster1	4598583	4599445	863	4599292	47	2.6055	Intron (SK1T00039885-RA/SK1G00039885, intron 3 of 4)	cluster1	4597150	4601112	3963	5	+	SK1G00039885	SK1T00039885-RA	2142	SUN4	EEC71894.1 hypothetical protein OsI_04640 [Oryza sativa Indica Group]	-	-	-	-	-	-	-	-
IP_peak_615	cluster1	4625015	4625364	350	4625180	45	3.15943	Downstream (<1kb)	cluster1	4626177	4632847	6671	19	-	SK1G00039890	SK1T00039890-RA	7667	Os01g0875500	KAF2953592.1 hypothetical protein DAI22_01g418700 [Oryza sativa Japonica Group]	-	-	-	-	GO:0009341//beta-galactosidase complex	GO:0004565//beta-galactosidase activity;GO:0030246//carbohydrate binding	GO:0005975//carbohydrate metabolic process	-
IP_peak_616	cluster1	4627521	4628789	1269	4628370	35.5	2.21599	Exon (SK1T00039890-RA/SK1G00039890, exon 14 of 19)	cluster1	4626177	4632847	6671	19	-	SK1G00039890	SK1T00039890-RA	4477	Os01g0875500	KAF2953592.1 hypothetical protein DAI22_01g418700 [Oryza sativa Japonica Group]	-	-	-	-	GO:0009341//beta-galactosidase complex	GO:0004565//beta-galactosidase activity;GO:0030246//carbohydrate binding	GO:0005975//carbohydrate metabolic process	-
IP_peak_617	cluster1	4636079	4636541	463	4636294	45.5	2.78837	Intron (SK1T00039891-RA/SK1G00039891, intron 1 of 5)	cluster1	4635403	4640365	4963	6	+	SK1G00039891	SK1T00039891-RA	891	At4g06599	EEC71890.1 hypothetical protein OsI_04634 [Oryza sativa Indica Group]	-	-	-	-	-	GO:0005515//protein binding;GO:0016787//hydrolase activity	GO:0008152//metabolic process	-
IP_peak_618	cluster1	4637308	4638801	1494	4638268	38.5	2.61362	Intron (SK1T00039891-RA/SK1G00039891, intron 2 of 5)	cluster1	4635403	4640365	4963	6	+	SK1G00039891	SK1T00039891-RA	2865	At4g06599	EEC71890.1 hypothetical protein OsI_04634 [Oryza sativa Indica Group]	-	-	-	-	-	GO:0005515//protein binding;GO:0016787//hydrolase activity	GO:0008152//metabolic process	-
IP_peak_619	cluster1	4642071	4642437	367	4642246	37	2.57457	Intron (SK1T00039892-RA/SK1G00039892, intron 4 of 4)	cluster1	4641745	4646616	4872	5	-	SK1G00039892	SK1T00039892-RA	4370	--	BAS75495.1 Os01g0875300, partial [Oryza sativa Japonica Group]	-	-	-	-	-	-	-	-
IP_peak_621	cluster1	4658990	4659473	484	4659289	39	2.29846	Downstream (1-2kb)	cluster1	4656730	4657841	1112	2	+	SK1G00039893	SK1T00039893-RA	2559	--	EAY76676.1 hypothetical protein OsI_04631 [Oryza sativa Indica Group]	-	-	-	-	-	-	-	-
IP_peak_622	cluster1	4670017	4670626	610	4670423	57	3.43963	3' UTR	cluster1	4668342	4671179	2838	7	+	SK1G00039895	SK1T00039895-RB	2081	aq_1628	EEC71889.1 hypothetical protein OsI_04629 [Oryza sativa Indica Group]	-	-	-	-	-	GO:0003677//DNA binding;GO:0003824//catalytic activity;GO:0003887//DNA-directed DNA polymerase activity	GO:0006260//DNA replication	-
IP_peak_625	cluster1	4708100	4708440	341	4708307	50.5	2.68085	Intron (SK1T00039899-RA/SK1G00039899, intron 1 of 4)	cluster1	4706948	4711146	4199	5	+	SK1G00039899	SK1T00039899-RA	1359	dguok	XP_015650445.1 uncharacterized protein LOC4324769 [Oryza sativa Japonica Group]	-	-	-	-	GO:0005940//septin ring;GO:0016021//integral component of membrane	GO:0003677//DNA binding;GO:0034061//DNA polymerase activity	GO:0000921//septin ring assembly	-
IP_peak_626	cluster1	4710129	4711365	1237	4710755	60.5	2.95745	Exon (SK1T00039899-RA/SK1G00039899, exon 5 of 5)	cluster1	4706948	4711146	4199	5	+	SK1G00039899	SK1T00039899-RA	3807	dguok	XP_015650445.1 uncharacterized protein LOC4324769 [Oryza sativa Japonica Group]	-	-	-	-	GO:0005940//septin ring;GO:0016021//integral component of membrane	GO:0003677//DNA binding;GO:0034061//DNA polymerase activity	GO:0000921//septin ring assembly	-
IP_peak_628	cluster1	4723966	4724718	753	4724353	43	2.56142	Intron (SK1T00039900-RA/SK1G00039900, intron 7 of 11)	cluster1	4719642	4726921	7280	12	+	SK1G00039900	SK1T00039900-RA	4711	PSI1	EEC71888.1 hypothetical protein OsI_04625 [Oryza sativa Indica Group]	-	-	-	-	-	GO:0005524//ATP binding;GO:0008134//transcription factor binding	GO:0006355//regulation of transcription, DNA-templated;GO:0045927//positive regulation of growth	-
IP_peak_629	cluster1	4725995	4726694	700	4726055	37	1.86555	Exon (SK1T00039900-RA/SK1G00039900, exon 12 of 12)	cluster1	4719642	4726921	7280	12	+	SK1G00039900	SK1T00039900-RA	6413	PSI1	EEC71888.1 hypothetical protein OsI_04625 [Oryza sativa Indica Group]	-	-	-	-	-	GO:0005524//ATP binding;GO:0008134//transcription factor binding	GO:0006355//regulation of transcription, DNA-templated;GO:0045927//positive regulation of growth	-
IP_peak_630	cluster1	4731572	4732050	479	4731758	51.5	2.92118	Exon (SK1T00039901-RA/SK1G00039901, exon 8 of 9)	cluster1	4728439	4734901	6463	9	+	SK1G00039901	SK1T00039901-RA	3319	EDRF1	EEC71887.1 hypothetical protein OsI_04624 [Oryza sativa Indica Group]	-	-	-	-	-	-	-	-
IP_peak_631	cluster1	4732264	4732904	641	4732396	39.5	2.21696	Exon (SK1T00039901-RA/SK1G00039901, exon 8 of 9)	cluster1	4728439	4734901	6463	9	+	SK1G00039901	SK1T00039901-RA	3957	EDRF1	EEC71887.1 hypothetical protein OsI_04624 [Oryza sativa Indica Group]	-	-	-	-	-	-	-	-
IP_peak_632	cluster1	4736448	4737727	1280	4736582	43	2.29889	Intron (SK1T00039902-RA/SK1G00039902, intron 6 of 8)	cluster1	4735910	4738049	2140	9	-	SK1G00039902	SK1T00039902-RA	1467	At2g21120	EAY76667.1 hypothetical protein OsI_04623 [Oryza sativa Indica Group]	-	-	-	-	GO:0016020//membrane;GO:0016021//integral component of membrane	GO:0015095//magnesium ion transmembrane transporter activity	GO:0015693//magnesium ion transport	-
IP_peak_634	cluster1	4753006	4753426	421	4753357	28.5	2.27171	Promoter (1-2kb)	cluster1	4755092	4755331	240	1	+	SK1G00039903	SK1T00039903-RA	-1735	--	BAS75478.1 Os01g0873300 [Oryza sativa Japonica Group]	-	-	-	-	-	-	-	-
IP_peak_635	cluster1	4756935	4757227	293	4757096	33.5	2.36983	Promoter (<=1kb)	cluster1	4757354	4759006	1653	1	+	SK1G00039904	SK1T00039904-RA	-258	ASE1	EAY76663.1 hypothetical protein OsI_04619 [Oryza sativa Indica Group]	Metabolism;Metabolism;Metabolism;Metabolism	Global and overview maps;Global and overview maps;Nucleotide metabolism;Amino acid metabolism	ko01100//Metabolic pathways;ko01110//Biosynthesis of secondary metabolites;ko00230//Purine metabolism;ko00250//Alanine, aspartate and glutamate metabolism	K00764;K00764;K00764;K00764	-	GO:0004044//amidophosphoribosyltransferase activity;GO:0004066//asparagine synthase (glutamine-hydrolyzing) activity;GO:0004360//glutamine-fructose-6-phosphate transaminase (isomerizing) activity;GO:0004749//ribose phosphate diphosphokinase activity	GO:0006040//amino sugar metabolic process;GO:0006529//asparagine biosynthetic process;GO:0009116//nucleoside metabolic process;GO:0009152//purine ribonucleotide biosynthetic process;GO:0009252//peptidoglycan biosynthetic process;GO:0052699//ergothioneine biosynthetic process	-
IP_peak_636	cluster1	4784982	4785406	425	4785180	35	2.15614	Intron (SK1T00039906-RA/SK1G00039906, intron 6 of 10)	cluster1	4783365	4787449	4085	11	+	SK1G00039906	SK1T00039906-RA	1815	PDPK2	XP_015622220.1 3-phosphoinositide-dependent protein kinase 2 isoform X1 [Oryza sativa Japonica Group]	-	-	-	-	-	GO:0004672//protein kinase activity;GO:0005524//ATP binding	GO:0006468//protein phosphorylation	-
IP_peak_637	cluster1	4790286	4790764	479	4790612	42	2.54069	Intron (SK1T00039907-RA/SK1G00039907, intron 7 of 22)	cluster1	4788098	4795940	7843	23	+	SK1G00039907	SK1T00039907-RA	2514	XRN3	XP_015621120.1 5'-3' exoribonuclease 3 isoform X1 [Oryza sativa Japonica Group]	Genetic Information Processing;Genetic Information Processing	Folding, sorting and degradation;Translation	ko03018//RNA degradation;ko03008//Ribosome biogenesis in eukaryotes	K12619;K12619	-	GO:0003676//nucleic acid binding;GO:0004527//exonuclease activity;GO:0008270//zinc ion binding	-	-
IP_peak_638	cluster1	4791016	4791649	634	4791201	36	2.23686	Exon (SK1T00039907-RA/SK1G00039907, exon 10 of 23)	cluster1	4788098	4795940	7843	23	+	SK1G00039907	SK1T00039907-RA	3103	XRN3	XP_015621120.1 5'-3' exoribonuclease 3 isoform X1 [Oryza sativa Japonica Group]	Genetic Information Processing;Genetic Information Processing	Folding, sorting and degradation;Translation	ko03018//RNA degradation;ko03008//Ribosome biogenesis in eukaryotes	K12619;K12619	-	GO:0003676//nucleic acid binding;GO:0004527//exonuclease activity;GO:0008270//zinc ion binding	-	-
IP_peak_639	cluster1	4792729	4793607	879	4792864	45	2.79724	Exon (SK1T00039907-RA/SK1G00039907, exon 13 of 23)	cluster1	4788098	4795940	7843	23	+	SK1G00039907	SK1T00039907-RA	4766	XRN3	XP_015621120.1 5'-3' exoribonuclease 3 isoform X1 [Oryza sativa Japonica Group]	Genetic Information Processing;Genetic Information Processing	Folding, sorting and degradation;Translation	ko03018//RNA degradation;ko03008//Ribosome biogenesis in eukaryotes	K12619;K12619	-	GO:0003676//nucleic acid binding;GO:0004527//exonuclease activity;GO:0008270//zinc ion binding	-	-
IP_peak_640	cluster1	4798323	4798626	304	4798487	42	2.14357	Downstream (2-3kb)	cluster1	4788098	4795940	7843	23	+	SK1G00039907	SK1T00039907-RA	10389	XRN3	XP_015621120.1 5'-3' exoribonuclease 3 isoform X1 [Oryza sativa Japonica Group]	Genetic Information Processing;Genetic Information Processing	Folding, sorting and degradation;Translation	ko03018//RNA degradation;ko03008//Ribosome biogenesis in eukaryotes	K12619;K12619	-	GO:0003676//nucleic acid binding;GO:0004527//exonuclease activity;GO:0008270//zinc ion binding	-	-
IP_peak_641	cluster1	4836005	4836549	545	4836140	35.5	2.91687	Intron (SK1T00039909-RA/SK1G00039909, intron 15 of 17)	cluster1	4824923	4851587	26665	18	-	SK1G00039909	SK1T00039909-RA	15447	NPF5.10	OEL37935.1 Protein NRT1/ PTR FAMILY 5.10 [Dichanthelium oligosanthes]	-	-	-	-	GO:0016020//membrane	GO:0015333//peptide:proton symporter activity;GO:0022857//transmembrane transporter activity	GO:0015833//peptide transport;GO:0055085//transmembrane transport	-
IP_peak_642	cluster1	4837283	4837837	555	4837678	42	3.3005	Intron (SK1T00039909-RA/SK1G00039909, intron 15 of 17)	cluster1	4824923	4851587	26665	18	-	SK1G00039909	SK1T00039909-RA	13909	NPF5.10	OEL37935.1 Protein NRT1/ PTR FAMILY 5.10 [Dichanthelium oligosanthes]	-	-	-	-	GO:0016020//membrane	GO:0015333//peptide:proton symporter activity;GO:0022857//transmembrane transporter activity	GO:0015833//peptide transport;GO:0055085//transmembrane transport	-
IP_peak_643	cluster1	4839301	4839868	568	4839765	26.5	2.38307	Intron (SK1T00039909-RA/SK1G00039909, intron 13 of 17)	cluster1	4824923	4851587	26665	18	-	SK1G00039909	SK1T00039909-RA	11822	NPF5.10	OEL37935.1 Protein NRT1/ PTR FAMILY 5.10 [Dichanthelium oligosanthes]	-	-	-	-	GO:0016020//membrane	GO:0015333//peptide:proton symporter activity;GO:0022857//transmembrane transporter activity	GO:0015833//peptide transport;GO:0055085//transmembrane transport	-
IP_peak_644	cluster1	4856889	4857391	503	4857278	34.5	1.97784	Promoter (<=1kb)	cluster1	4857797	4859852	2056	3	+	SK1G00039911	SK1T00039911-RA	-519	--	BAH91398.1 Os01g0871350, partial [Oryza sativa Japonica Group]	-	-	-	-	-	-	GO:0045087//innate immune response	-
IP_peak_645	cluster1	4858220	4859516	1297	4858498	42	2.31571	Intron (SK1T00039911-RA/SK1G00039911, intron 2 of 2)	cluster1	4857797	4859852	2056	3	+	SK1G00039911	SK1T00039911-RA	701	--	BAH91398.1 Os01g0871350, partial [Oryza sativa Japonica Group]	-	-	-	-	-	-	GO:0045087//innate immune response	-
IP_peak_646	cluster1	4860018	4860576	559	4860148	39	2.44764	Downstream (<1kb)	cluster1	4857797	4859852	2056	3	+	SK1G00039911	SK1T00039911-RA	2351	--	BAH91398.1 Os01g0871350, partial [Oryza sativa Japonica Group]	-	-	-	-	-	-	GO:0045087//innate immune response	-
IP_peak_647	cluster1	4862249	4862585	337	4862397	46.5	2.55998	Intron (SK1T00039912-RA/SK1G00039912, intron 4 of 9)	cluster1	4860494	4863843	3350	10	-	SK1G00039912	SK1T00039912-RA	1446	AAT	XP_015641332.1 bifunctional aspartate aminotransferase and glutamate/aspartate-prephenate aminotransferase [Oryza sativa Japonica Group]	Metabolism;Metabolism;Metabolism;Metabolism;Metabolism;Metabolism;Metabolism;Metabolism	Global and overview maps;Global and overview maps;Global and overview maps;Amino acid metabolism;Amino acid metabolism;Amino acid metabolism;Biosynthesis of other secondary metabolites;Biosynthesis of other secondary metabolites	ko01100//Metabolic pathways;ko01110//Biosynthesis of secondary metabolites;ko01230//Biosynthesis of amino acids;ko00400//Phenylalanine, tyrosine and tryptophan biosynthesis;ko00350//Tyrosine metabolism;ko00360//Phenylalanine metabolism;ko00960//Tropane, piperidine and pyridine alkaloid biosynthesis;ko00950//Isoquinoline alkaloid biosynthesis	K15849;K15849;K15849;K15849;K15849;K15849;K15849;K15849	GO:0005737//cytoplasm	GO:0003824//catalytic activity;GO:0004400//histidinol-phosphate transaminase activity;GO:0004838//L-tyrosine:2-oxoglutarate aminotransferase activity;GO:0009016//succinyldiaminopimelate transaminase activity;GO:0030170//pyridoxal phosphate binding;GO:0047688//aspartate 4-decarboxylase activity;GO:0048472//threonine-phosphate decarboxylase activity	GO:0000105//histidine biosynthetic process;GO:0006531//aspartate metabolic process;GO:0006559//L-phenylalanine catabolic process;GO:0006572//tyrosine catabolic process;GO:0009058//biosynthetic process;GO:0009236//cobalamin biosynthetic process;GO:0019877//diaminopimelate biosynthetic process;GO:0042398//cellular modified amino acid biosynthetic process	-
IP_peak_648	cluster1	4866811	4867350	540	4867059	36	2.1073	Intron (SK1T00039913-RA/SK1G00039913, intron 2 of 2)	cluster1	4864721	4869652	4932	3	-	SK1G00039913	SK1T00039913-RA	2593	--	-	-	-	-	-	-	-	-	-
IP_peak_649	cluster1	4868899	4869429	531	4869235	45.5	2.77992	Intron (SK1T00039913-RA/SK1G00039913, intron 1 of 2)	cluster1	4864721	4869652	4932	3	-	SK1G00039913	SK1T00039913-RA	417	--	-	-	-	-	-	-	-	-	-
IP_peak_650	cluster1	4873195	4874049	855	4873426	53	3.06936	Exon (SK1T00039914-RA/SK1G00039914, exon 14 of 14)	cluster1	4873268	4879912	6645	14	-	SK1G00039914	SK1T00039914-RA	6486	EMB8	EEC71877.1 hypothetical protein OsI_04599 [Oryza sativa Indica Group]	-	-	-	-	-	GO:0008236//serine-type peptidase activity	GO:0006508//proteolysis	-
IP_peak_651	cluster1	4875560	4875988	429	4875698	41.5	2.43585	Intron (SK1T00039914-RA/SK1G00039914, intron 7 of 13)	cluster1	4873268	4879912	6645	14	-	SK1G00039914	SK1T00039914-RA	4214	EMB8	EEC71877.1 hypothetical protein OsI_04599 [Oryza sativa Indica Group]	-	-	-	-	-	GO:0008236//serine-type peptidase activity	GO:0006508//proteolysis	-
IP_peak_652	cluster1	4880567	4881112	546	4880944	63	4.39043	Promoter (1-2kb)	cluster1	4873268	4879912	6645	14	-	SK1G00039914	SK1T00039914-RA	-1032	EMB8	EEC71877.1 hypothetical protein OsI_04599 [Oryza sativa Indica Group]	-	-	-	-	-	GO:0008236//serine-type peptidase activity	GO:0006508//proteolysis	-
IP_peak_653	cluster1	4905476	4905745	270	4905598	42.5	3.02863	Downstream (<1kb)	cluster1	4905795	4908157	2363	2	-	SK1G00039918	SK1T00039918-RA	2559	AMT3-1	XP_015622013.1 ammonium transporter 3 member 1 isoform X1 [Oryza sativa Japonica Group]	-	-	-	-	GO:0016020//membrane	GO:0008519//ammonium transmembrane transporter activity	GO:0015696//ammonium transport	-
IP_peak_655	cluster1	4917090	4917586	497	4917222	33	2.3454	Downstream (<1kb)	cluster1	4917464	4921399	3936	12	-	SK1G00039919	SK1T00039919-RA	4177	PIGU	KAF2953531.1 hypothetical protein DAI22_01g414800 [Oryza sativa Japonica Group]	Metabolism;Metabolism	Global and overview maps;Glycan biosynthesis and metabolism	ko01100//Metabolic pathways;ko00563//Glycosylphosphatidylinositol(GPI)-anchor biosynthesis	K05293;K05293	-	-	-	-
IP_peak_656	cluster1	4917817	4919513	1697	4918808	38	2.58485666666667	Intron (SK1T00039919-RA/SK1G00039919, intron 6 of 11)	cluster1	4917464	4921399	3936	12	-	SK1G00039919	SK1T00039919-RA	2591	PIGU	KAF2953531.1 hypothetical protein DAI22_01g414800 [Oryza sativa Japonica Group]	Metabolism;Metabolism	Global and overview maps;Glycan biosynthesis and metabolism	ko01100//Metabolic pathways;ko00563//Glycosylphosphatidylinositol(GPI)-anchor biosynthesis	K05293;K05293	-	-	-	-
IP_peak_657	cluster1	4925978	4926642	665	4926389	39.5	2.44112	Exon (SK1T00039920-RA/SK1G00039920, exon 8 of 12)	cluster1	4923204	4928352	5149	12	+	SK1G00039920	SK1T00039920-RA	3185	Os01g0870100	BAD81711.1 putative DMI1 protein [Oryza sativa Japonica Group]	-	-	-	-	-	GO:0008324//cation transmembrane transporter activity	GO:0006813//potassium ion transport	-
IP_peak_658	cluster1	4930331	4930925	595	4930660	38.5	2.47805	Intron (SK1T00039921-RA/SK1G00039921, intron 6 of 8)	cluster1	4929400	4934054	4655	9	-	SK1G00039921	SK1T00039921-RA	3394	SAPK4	XP_015613364.1 serine/threonine-protein kinase SAPK4 [Oryza sativa Japonica Group]	Environmental Information Processing;Environmental Information Processing	Signal transduction;Signal transduction	ko04075//Plant hormone signal transduction;ko04016//MAPK signaling pathway - plant	K14498;K14498	GO:0005634//nucleus	GO:0004672//protein kinase activity;GO:0005524//ATP binding;GO:0008270//zinc ion binding	GO:0006383//transcription from RNA polymerase III promoter;GO:0006468//protein phosphorylation	-
IP_peak_659	cluster1	4931560	4932489	930	4932118	36.5	2.16753	Intron (SK1T00039921-RA/SK1G00039921, intron 6 of 8)	cluster1	4929400	4934054	4655	9	-	SK1G00039921	SK1T00039921-RA	1936	SAPK4	XP_015613364.1 serine/threonine-protein kinase SAPK4 [Oryza sativa Japonica Group]	Environmental Information Processing;Environmental Information Processing	Signal transduction;Signal transduction	ko04075//Plant hormone signal transduction;ko04016//MAPK signaling pathway - plant	K14498;K14498	GO:0005634//nucleus	GO:0004672//protein kinase activity;GO:0005524//ATP binding;GO:0008270//zinc ion binding	GO:0006383//transcription from RNA polymerase III promoter;GO:0006468//protein phosphorylation	-
IP_peak_660	cluster1	4934895	4935872	978	4935747	38	2.50319	Promoter (1-2kb)	cluster1	4929400	4934054	4655	9	-	SK1G00039921	SK1T00039921-RA	-1693	SAPK4	XP_015613364.1 serine/threonine-protein kinase SAPK4 [Oryza sativa Japonica Group]	Environmental Information Processing;Environmental Information Processing	Signal transduction;Signal transduction	ko04075//Plant hormone signal transduction;ko04016//MAPK signaling pathway - plant	K14498;K14498	GO:0005634//nucleus	GO:0004672//protein kinase activity;GO:0005524//ATP binding;GO:0008270//zinc ion binding	GO:0006383//transcription from RNA polymerase III promoter;GO:0006468//protein phosphorylation	-
IP_peak_662	cluster1	4942436	4943063	628	4942562	48	2.85033	Downstream (2-3kb)	cluster1	4944610	4947658	3049	3	-	SK1G00039922	SK1T00039922-RA	5096	PSBS1	XP_015621169.1 photosystem II 22 kDa protein, chloroplastic [Oryza sativa Japonica Group]	Metabolism	Energy metabolism	ko00195//Photosynthesis	K03542	-	-	-	-
IP_peak_663	cluster1	4953877	4954765	889	4954498	50	2.97412	Intron (SK1T00039924-RA/SK1G00039924, intron 8 of 8)	cluster1	4952205	4954900	2696	9	+	SK1G00039924	SK1T00039924-RA	2293	2025-08-07	XP_015627924.1 AUGMIN subunit 7 [Oryza sativa Japonica Group]	-	-	-	-	GO:0030956//glutamyl-tRNA(Gln) amidotransferase complex	GO:0050567//glutaminyl-tRNA synthase (glutamine-hydrolyzing) activity;GO:0051011//microtubule minus-end binding	GO:0006424//glutamyl-tRNA aminoacylation	-
IP_peak_664	cluster1	4958761	4959181	421	4958940	160.5	10.5843	Promoter (<=1kb)	cluster1	4959651	4973567	13917	16	+	SK1G00039926	SK1T00039926-RA	-711	--	EEE55732.1 hypothetical protein OsJ_04220 [Oryza sativa Japonica Group]	-	-	-	-	-	GO:0005515//protein binding	-	-
IP_peak_665	cluster1	4959907	4960259	353	4960074	39.5	2.4372	Intron (SK1T00039926-RA/SK1G00039926, intron 1 of 15)	cluster1	4959651	4973567	13917	16	+	SK1G00039926	SK1T00039926-RA	423	--	EEE55732.1 hypothetical protein OsJ_04220 [Oryza sativa Japonica Group]	-	-	-	-	-	GO:0005515//protein binding	-	-
IP_peak_666	cluster1	4961439	4962307	869	4962167	35.5	2.45935	Intron (SK1T00039926-RA/SK1G00039926, intron 3 of 15)	cluster1	4959651	4973567	13917	16	+	SK1G00039926	SK1T00039926-RA	2516	--	EEE55732.1 hypothetical protein OsJ_04220 [Oryza sativa Japonica Group]	-	-	-	-	-	GO:0005515//protein binding	-	-
IP_peak_667	cluster1	4964457	4964833	377	4964654	37	2.23169	Intron (SK1T00039926-RA/SK1G00039926, intron 7 of 15)	cluster1	4959651	4973567	13917	16	+	SK1G00039926	SK1T00039926-RA	5003	--	EEE55732.1 hypothetical protein OsJ_04220 [Oryza sativa Japonica Group]	-	-	-	-	-	GO:0005515//protein binding	-	-
IP_peak_668	cluster1	4965129	4966460	1332	4965677	48.5	3.17366	Intron (SK1T00039926-RA/SK1G00039926, intron 7 of 15)	cluster1	4959651	4973567	13917	16	+	SK1G00039926	SK1T00039926-RA	6026	--	EEE55732.1 hypothetical protein OsJ_04220 [Oryza sativa Japonica Group]	-	-	-	-	-	GO:0005515//protein binding	-	-
IP_peak_669	cluster1	4966773	4967989	1217	4967461	41.5	2.7735	Intron (SK1T00039926-RA/SK1G00039926, intron 7 of 15)	cluster1	4959651	4973567	13917	16	+	SK1G00039926	SK1T00039926-RA	7810	--	EEE55732.1 hypothetical protein OsJ_04220 [Oryza sativa Japonica Group]	-	-	-	-	-	GO:0005515//protein binding	-	-
IP_peak_670	cluster1	4968433	4970993	2561	4970108	47	3.10965	Exon (SK1T00039926-RA/SK1G00039926, exon 10 of 16)	cluster1	4959651	4973567	13917	16	+	SK1G00039926	SK1T00039926-RA	10457	--	EEE55732.1 hypothetical protein OsJ_04220 [Oryza sativa Japonica Group]	-	-	-	-	-	GO:0005515//protein binding	-	-
IP_peak_671	cluster1	4972146	4973119	974	4972412	41.5	2.50104	Intron (SK1T00039926-RA/SK1G00039926, intron 14 of 15)	cluster1	4959651	4973567	13917	16	+	SK1G00039926	SK1T00039926-RA	12761	--	EEE55732.1 hypothetical protein OsJ_04220 [Oryza sativa Japonica Group]	-	-	-	-	-	GO:0005515//protein binding	-	-
IP_peak_672	cluster1	5005757	5006095	339	5005959	32.5	2.17937	Exon (SK1T00039930-RA/SK1G00039930, exon 1 of 32)	cluster1	5004946	5017161	12216	32	+	SK1G00039930	SK1T00039930-RA	1013	Os01g0868300	EEC71866.1 hypothetical protein OsI_04575 [Oryza sativa Indica Group]	Genetic Information Processing	Replication and repair	ko03030//DNA replication	K02320	GO:0005634//nucleus	GO:0000166//nucleotide binding;GO:0003677//DNA binding;GO:0003887//DNA-directed DNA polymerase activity;GO:0008270//zinc ion binding	GO:0006260//DNA replication	-
IP_peak_673	cluster1	5008971	5009768	798	5009263	43.5	2.65242	Exon (SK1T00039930-RA/SK1G00039930, exon 13 of 32)	cluster1	5004946	5017161	12216	32	+	SK1G00039930	SK1T00039930-RA	4317	Os01g0868300	EEC71866.1 hypothetical protein OsI_04575 [Oryza sativa Indica Group]	Genetic Information Processing	Replication and repair	ko03030//DNA replication	K02320	GO:0005634//nucleus	GO:0000166//nucleotide binding;GO:0003677//DNA binding;GO:0003887//DNA-directed DNA polymerase activity;GO:0008270//zinc ion binding	GO:0006260//DNA replication	-
IP_peak_674	cluster1	5013709	5014454	746	5014001	69	3.35408	Intron (SK1T00039930-RA/SK1G00039930, intron 27 of 31)	cluster1	5004946	5017161	12216	32	+	SK1G00039930	SK1T00039930-RA	9055	Os01g0868300	EEC71866.1 hypothetical protein OsI_04575 [Oryza sativa Indica Group]	Genetic Information Processing	Replication and repair	ko03030//DNA replication	K02320	GO:0005634//nucleus	GO:0000166//nucleotide binding;GO:0003677//DNA binding;GO:0003887//DNA-directed DNA polymerase activity;GO:0008270//zinc ion binding	GO:0006260//DNA replication	-
IP_peak_675	cluster1	5018317	5018907	591	5018726	36	2.20858	Promoter (<=1kb)	cluster1	5018778	5024251	5474	5	+	SK1G00039931	SK1T00039931-RA	-52	PAT08	XP_015621925.1 protein S-acyltransferase 8 [Oryza sativa Japonica Group]	-	-	-	-	-	GO:0016409//palmitoyltransferase activity	GO:0070072//vacuolar proton-transporting V-type ATPase complex assembly	-
IP_peak_676	cluster1	5020072	5020619	548	5020277	41.5	2.05871	Exon (SK1T00039931-RA/SK1G00039931, exon 2 of 5)	cluster1	5018778	5024251	5474	5	+	SK1G00039931	SK1T00039931-RA	1499	PAT08	XP_015621925.1 protein S-acyltransferase 8 [Oryza sativa Japonica Group]	-	-	-	-	-	GO:0016409//palmitoyltransferase activity	GO:0070072//vacuolar proton-transporting V-type ATPase complex assembly	-
IP_peak_677	cluster1	5021295	5021969	675	5021857	39	2.48739	Intron (SK1T00039931-RA/SK1G00039931, intron 4 of 4)	cluster1	5018778	5024251	5474	5	+	SK1G00039931	SK1T00039931-RA	3079	PAT08	XP_015621925.1 protein S-acyltransferase 8 [Oryza sativa Japonica Group]	-	-	-	-	-	GO:0016409//palmitoyltransferase activity	GO:0070072//vacuolar proton-transporting V-type ATPase complex assembly	-
IP_peak_678	cluster1	5055199	5055510	312	5055433	38.5	2.26283	Promoter (1-2kb)	cluster1	5057152	5059671	2520	2	+	SK1G00039935	SK1T00039935-RA	-1719	ERF110	XP_015613619.1 ethylene-responsive transcription factor ABR1 [Oryza sativa Japonica Group]	-	-	-	-	-	GO:0003700//transcription factor activity, sequence-specific DNA binding	GO:0006355//regulation of transcription, DNA-templated	ERF
IP_peak_679	cluster1	5064025	5064659	635	5064310	47	2.64473	Exon (SK1T00039936-RA/SK1G00039936, exon 7 of 8)	cluster1	5061574	5064901	3328	8	+	SK1G00039936	SK1T00039936-RA	2736	LCV2	KAF0919223.1 hypothetical protein E2562_028999 [Oryza meyeriana var. granulata] [Oryza meyeriana]	-	-	-	-	-	-	-	-
IP_peak_680	cluster1	5067104	5067604	501	5067368	54.5	3.09429	Intron (SK1T00039937-RA/SK1G00039937, intron 5 of 14)	cluster1	5064879	5069178	4300	15	-	SK1G00039937	SK1T00039937-RA	1810	At1g43190	XP_015613598.1 polypyrimidine tract-binding protein homolog 3 isoform X1 [Oryza sativa Japonica Group]	-	-	-	-	-	GO:0003676//nucleic acid binding;GO:0003723//RNA binding	GO:0008380//RNA splicing	-
IP_peak_681	cluster1	5075612	5076501	890	5076185	48.5	3.32889	Exon (SK1T00039938-RA/SK1G00039938, exon 10 of 17)	cluster1	5070552	5083503	12952	17	-	SK1G00039938	SK1T00039938-RA	7318	UGT80B1	TVU36386.1 hypothetical protein EJB05_18319, partial [Eragrostis curvula]	-	-	-	-	GO:0016020//membrane	GO:0008194//UDP-glycosyltransferase activity;GO:0016758//transferase activity, transferring hexosyl groups	GO:0005975//carbohydrate metabolic process;GO:0030259//lipid glycosylation	-
IP_peak_682	cluster1	5077917	5078829	913	5078540	43	2.74775	Intron (SK1T00039938-RA/SK1G00039938, intron 5 of 16)	cluster1	5070552	5083503	12952	17	-	SK1G00039938	SK1T00039938-RA	4963	UGT80B1	TVU36386.1 hypothetical protein EJB05_18319, partial [Eragrostis curvula]	-	-	-	-	GO:0016020//membrane	GO:0008194//UDP-glycosyltransferase activity;GO:0016758//transferase activity, transferring hexosyl groups	GO:0005975//carbohydrate metabolic process;GO:0030259//lipid glycosylation	-
IP_peak_683	cluster1	5079125	5080354	1230	5079623	39	2.46012	Intron (SK1T00039938-RA/SK1G00039938, intron 4 of 16)	cluster1	5070552	5083503	12952	17	-	SK1G00039938	SK1T00039938-RA	3880	UGT80B1	TVU36386.1 hypothetical protein EJB05_18319, partial [Eragrostis curvula]	-	-	-	-	GO:0016020//membrane	GO:0008194//UDP-glycosyltransferase activity;GO:0016758//transferase activity, transferring hexosyl groups	GO:0005975//carbohydrate metabolic process;GO:0030259//lipid glycosylation	-
IP_peak_684	cluster1	5082908	5083209	302	5083011	30.5	2.16757	Intron (SK1T00039938-RA/SK1G00039938, intron 1 of 16)	cluster1	5070552	5083503	12952	17	-	SK1G00039938	SK1T00039938-RA	492	UGT80B1	TVU36386.1 hypothetical protein EJB05_18319, partial [Eragrostis curvula]	-	-	-	-	GO:0016020//membrane	GO:0008194//UDP-glycosyltransferase activity;GO:0016758//transferase activity, transferring hexosyl groups	GO:0005975//carbohydrate metabolic process;GO:0030259//lipid glycosylation	-
IP_peak_685	cluster1	5092329	5093051	723	5092916	39.5	2.60085	Downstream (<1kb)	cluster1	5090161	5092711	2551	4	+	SK1G00039939	SK1T00039939-RA	2755	BZIP12	XP_015612904.1 bZIP transcription factor 12-like [Oryza sativa Japonica Group]	Environmental Information Processing	Signal transduction	ko04075//Plant hormone signal transduction	K14432	-	GO:0003677//DNA binding;GO:0003700//transcription factor activity, sequence-specific DNA binding;GO:0003924//GTPase activity;GO:0005525//GTP binding;GO:0008855//exodeoxyribonuclease VII activity	GO:0006355//regulation of transcription, DNA-templated	bZIP
IP_peak_686	cluster1	5094823	5095123	301	5094915	39.5	2.5545	Exon (SK1T00039940-RA/SK1G00039940, exon 9 of 13)	cluster1	5093418	5097891	4474	13	-	SK1G00039940	SK1T00039940-RA	2976	--	EEC71860.1 hypothetical protein OsI_04565 [Oryza sativa Indica Group]	-	-	-	-	-	GO:0005515//protein binding	-	-
IP_peak_687	cluster1	5098875	5099374	500	5099120	39.5	2.55631	Promoter (1-2kb)	cluster1	5093418	5097891	4474	13	-	SK1G00039940	SK1T00039940-RA	-1229	--	EEC71860.1 hypothetical protein OsI_04565 [Oryza sativa Indica Group]	-	-	-	-	-	GO:0005515//protein binding	-	-
IP_peak_688	cluster1	5099643	5100514	872	5099818	41	2.65868	Promoter (1-2kb)	cluster1	5093418	5097891	4474	13	-	SK1G00039940	SK1T00039940-RA	-1927	--	EEC71860.1 hypothetical protein OsI_04565 [Oryza sativa Indica Group]	-	-	-	-	-	GO:0005515//protein binding	-	-
IP_peak_690	cluster1	5112274	5112667	394	5112450	39	2.44026	Intron (SK1T00039941-RA/SK1G00039941, intron 4 of 5)	cluster1	5111029	5114315	3287	6	-	SK1G00039941	SK1T00039941-RA	1865	TULP3	XP_015641437.1 tubby-like F-box protein 3 [Oryza sativa Japonica Group]	-	-	-	-	-	GO:0005515//protein binding	-	-
IP_peak_691	cluster1	5113244	5113899	656	5113499	61	3.65878	Intron (SK1T00039941-RA/SK1G00039941, intron 1 of 5)	cluster1	5111029	5114315	3287	6	-	SK1G00039941	SK1T00039941-RA	816	TULP3	XP_015641437.1 tubby-like F-box protein 3 [Oryza sativa Japonica Group]	-	-	-	-	-	GO:0005515//protein binding	-	-
IP_peak_692	cluster1	5121399	5122552	1154	5121810	42.5	2.73257	Intron (SK1T00039943-RA/SK1G00039943, intron 1 of 2)	cluster1	5121211	5122623	1413	3	+	SK1G00039943	SK1T00039943-RA	599	LSM3A	XP_015641494.1 sm-like protein LSM3A [Oryza sativa Japonica Group]	Genetic Information Processing;Genetic Information Processing	Transcription;Folding, sorting and degradation	ko03040//Spliceosome;ko03018//RNA degradation	K12622;K12622	-	-	-	-
IP_peak_693	cluster1	5124309	5124644	336	5124454	43.5	2.83918	Promoter (1-2kb)	cluster1	5126289	5127618	1330	8	+	SK1G00039944	SK1T00039944-RA	-1835	IPP	XP_015641483.1 soluble inorganic pyrophosphatase [Oryza sativa Japonica Group]	Metabolism	Energy metabolism	ko00190//Oxidative phosphorylation	K01507	GO:0005737//cytoplasm	GO:0000287//magnesium ion binding;GO:0004427//inorganic diphosphatase activity	GO:0006796//phosphate-containing compound metabolic process	-
IP_peak_694	cluster1	5131520	5132833	1314	5132048	51	3.29492	Promoter (1-2kb)	cluster1	5127824	5130807	2984	12	-	SK1G00039945	SK1T00039945-RA	-1241	OsI_04558	XP_015641461.1 fructose-1,6-bisphosphatase, cytosolic [Oryza sativa Japonica Group]	Metabolism;Metabolism;Metabolism;Metabolism;Metabolism;Metabolism;Metabolism	Global and overview maps;Global and overview maps;Global and overview maps;Carbohydrate metabolism;Energy metabolism;Carbohydrate metabolism;Carbohydrate metabolism	ko01100//Metabolic pathways;ko01110//Biosynthesis of secondary metabolites;ko01200//Carbon metabolism;ko00010//Glycolysis / Gluconeogenesis;ko00710//Carbon fixation in photosynthetic organisms;ko00051//Fructose and mannose metabolism;ko00030//Pentose phosphate pathway	K03841;K03841;K03841;K03841;K03841;K03841;K03841	-	-	-	-
IP_peak_695	cluster1	5133785	5134119	335	5133906	34.5	2.07022	Intron (SK1T00039946-RA/SK1G00039946, intron 2 of 6)	cluster1	5131705	5135452	3748	7	-	SK1G00039946	SK1T00039946-RA	1546	YKT61	XP_015641471.1 VAMP-like protein YKT61 [Oryza sativa Japonica Group]	Genetic Information Processing	Folding, sorting and degradation	ko04130//SNARE interactions in vesicular transport	K08516	GO:0016021//integral component of membrane	-	GO:0016192//vesicle-mediated transport	-
IP_peak_696	cluster1	5139284	5140030	747	5139576	35.5	2.18087	Intron (SK1T00039948-RA/SK1G00039948, intron 1 of 4)	cluster1	5136835	5140553	3719	5	-	SK1G00039948	SK1T00039948-RA	977	ACT7	XP_015641450.1 actin-7 [Oryza sativa Japonica Group]	-	-	-	-	-	-	-	-
IP_peak_700	cluster1	5172021	5172410	390	5172253	44.5	2.80991	Exon (SK1T00039952-RA/SK1G00039952, exon 6 of 10)	cluster1	5170325	5175849	5525	10	-	SK1G00039952	SK1T00039952-RA	3596	LHW	EAY76601.1 hypothetical protein OsI_04550 [Oryza sativa Indica Group]	-	-	-	-	-	GO:0046983//protein dimerization activity	-	bHLH
IP_peak_701	cluster1	5191565	5192092	528	5191996	37	2.53514	Promoter (1-2kb)	cluster1	5193352	5197597	4246	8	+	SK1G00039955	SK1T00039955-RA	-1356	At2g26230	XP_015622191.1 uricase [Oryza sativa Japonica Group]	Metabolism;Metabolism;Metabolism	Global and overview maps;Nucleotide metabolism;Biosynthesis of other secondary metabolites	ko01100//Metabolic pathways;ko00230//Purine metabolism;ko00232//Caffeine metabolism	K00365;K00365;K00365	-	GO:0004846//urate oxidase activity	GO:0019628//urate catabolic process	-
IP_peak_702	cluster1	5195776	5197276	1501	5196446	35	2.58524	Intron (SK1T00039955-RA/SK1G00039955, intron 7 of 7)	cluster1	5193352	5197597	4246	8	+	SK1G00039955	SK1T00039955-RA	3094	At2g26230	XP_015622191.1 uricase [Oryza sativa Japonica Group]	Metabolism;Metabolism;Metabolism	Global and overview maps;Nucleotide metabolism;Biosynthesis of other secondary metabolites	ko01100//Metabolic pathways;ko00230//Purine metabolism;ko00232//Caffeine metabolism	K00365;K00365;K00365	-	GO:0004846//urate oxidase activity	GO:0019628//urate catabolic process	-
IP_peak_703	cluster1	5215861	5216108	248	5215976	51.5	2.93709	Intron (SK1T00039956-RA/SK1G00039956, intron 5 of 14)	cluster1	5215102	5221028	5927	15	+	SK1G00039956	SK1T00039956-RA	874	NEK5	XP_015621068.2 serine/threonine-protein kinase Nek5 isoform X2 [Oryza sativa Japonica Group]	-	-	-	-	-	GO:0004672//protein kinase activity;GO:0005524//ATP binding;GO:0016787//hydrolase activity	GO:0006468//protein phosphorylation;GO:0008152//metabolic process	-
IP_peak_704	cluster1	5216408	5217217	810	5216560	47	2.55152	Intron (SK1T00039956-RA/SK1G00039956, intron 9 of 14)	cluster1	5215102	5221028	5927	15	+	SK1G00039956	SK1T00039956-RA	1458	NEK5	XP_015621068.2 serine/threonine-protein kinase Nek5 isoform X2 [Oryza sativa Japonica Group]	-	-	-	-	-	GO:0004672//protein kinase activity;GO:0005524//ATP binding;GO:0016787//hydrolase activity	GO:0006468//protein phosphorylation;GO:0008152//metabolic process	-
IP_peak_705	cluster1	5218025	5219085	1061	5218648	33.3333333333333	2.02779	Exon (SK1T00039956-RA/SK1G00039956, exon 14 of 15)	cluster1	5215102	5221028	5927	15	+	SK1G00039956	SK1T00039956-RA	3546	NEK5	XP_015621068.2 serine/threonine-protein kinase Nek5 isoform X2 [Oryza sativa Japonica Group]	-	-	-	-	-	GO:0004672//protein kinase activity;GO:0005524//ATP binding;GO:0016787//hydrolase activity	GO:0006468//protein phosphorylation;GO:0008152//metabolic process	-
IP_peak_706	cluster1	5220622	5221203	582	5221115	43.5	2.82428	Promoter (1-2kb)	cluster1	5222644	5222871	228	1	+	SK1G00039957	SK1T00039957-RA	-1529	--	BAS75368.1 Os01g0864566 [Oryza sativa Japonica Group]	-	-	-	-	-	-	-	-
IP_peak_707	cluster1	5233197	5233520	324	5233316	39	2.06373	Downstream (1-2kb)	cluster1	5231488	5232198	711	1	+	SK1G00039959	SK1T00039959-RA	1828	--	BAB63813.1 putative harpin inducing protein [Oryza sativa Japonica Group]	-	-	-	-	-	-	-	-
IP_peak_710	cluster1	5265587	5266367	781	5265783	98.5	6.1158	Downstream (1-2kb)	cluster1	5267586	5267975	390	1	-	SK1G00039963	SK1T00039963-RA	2192	--	XP_015646296.1 uncharacterized protein LOC4324785 [Oryza sativa Japonica Group]	-	-	-	-	-	-	-	-
IP_peak_711	cluster1	5268972	5269361	390	5269124	28	1.92521	Promoter (1-2kb)	cluster1	5270237	5273396	3160	2	+	SK1G00039964	SK1T00039964-RA	-1113	--	EAY76587.1 hypothetical protein OsI_04535 [Oryza sativa Indica Group]	-	-	-	-	-	-	-	-
IP_peak_712	cluster1	5271626	5271929	304	5271772	40	2.70443	Intron (SK1T00039964-RA/SK1G00039964, intron 1 of 1)	cluster1	5270237	5273396	3160	2	+	SK1G00039964	SK1T00039964-RA	1535	--	EAY76587.1 hypothetical protein OsI_04535 [Oryza sativa Indica Group]	-	-	-	-	-	-	-	-
IP_peak_713	cluster1	5275281	5275541	261	5275418	70.5	4.47202	5' UTR	cluster1	5274133	5275463	1331	2	-	SK1G00039965	SK1T00039965-RA	45	DIVARICATA	AIX87959.1 MYB transcription factor [Oryza sativa Indica Group]	-	-	-	-	-	GO:0003700//transcription factor activity, sequence-specific DNA binding	GO:0006355//regulation of transcription, DNA-templated	MYB
IP_peak_714	cluster1	5279229	5279940	712	5279719	38.5	2.23289	3' UTR	cluster1	5276801	5283432	6632	4	+	SK1G00039966	SK1T00039966-RA	2918	--	-	-	-	-	-	-	-	-	-
IP_peak_716	cluster1	5326279	5327088	810	5326782	33	2.57951	Promoter (1-2kb)	cluster1	5324330	5325664	1335	2	-	SK1G00039968	SK1T00039968-RA	-1118	NAC090	XP_015632683.1 NAC domain-containing protein 90 isoform X1 [Oryza sativa Japonica Group]	-	-	-	-	-	GO:0003677//DNA binding	GO:0006355//regulation of transcription, DNA-templated	NAC
IP_peak_717	cluster1	5334492	5334878	387	5334616	37	2.18352	Downstream (1-2kb)	cluster1	5335746	5336405	660	1	-	SK1G00039970	SK1T00039970-RA	1789	--	XP_015620569.1 rab-like protein 6 isoform X2 [Oryza sativa Japonica Group]	-	-	-	-	-	-	-	-
IP_peak_718	cluster1	5340524	5341194	671	5341009	42.5	2.53373	Intron (SK1T00039973-RA/SK1G00039973, intron 2 of 10)	cluster1	5339946	5344209	4264	11	+	SK1G00039973	SK1T00039973-RA	1063	SNX1	XP_015620548.1 sorting nexin 1 [Oryza sativa Japonica Group]	Cellular Processes	Transport and catabolism	ko04144//Endocytosis	K17917	-	GO:0035091//phosphatidylinositol binding	-	-
IP_peak_719	cluster1	5342770	5343818	1049	5343308	43.5	2.30752	Exon (SK1T00039973-RA/SK1G00039973, exon 9 of 11)	cluster1	5339946	5344209	4264	11	+	SK1G00039973	SK1T00039973-RA	3362	SNX1	XP_015620548.1 sorting nexin 1 [Oryza sativa Japonica Group]	Cellular Processes	Transport and catabolism	ko04144//Endocytosis	K17917	-	GO:0035091//phosphatidylinositol binding	-	-
IP_peak_720	cluster1	5355557	5356113	557	5355735	35	2.08814	Intron (SK1T00039977-RA/SK1G00039977, intron 1 of 2)	cluster1	5352776	5356844	4069	3	-	SK1G00039977	SK1T00039977-RA	1109	--	XP_025878138.1 uncharacterized protein LOC4324739 [Oryza sativa Japonica Group]	-	-	-	-	-	GO:0000155//phosphorelay sensor kinase activity;GO:0005506//iron ion binding;GO:0005515//protein binding	GO:0006749//glutathione metabolic process;GO:0007165//signal transduction;GO:0030091//protein repair;GO:0051186//cofactor metabolic process	-
IP_peak_723	cluster1	5378107	5378588	482	5378399	35	3.00896	Downstream (2-3kb)	cluster1	5377064	5377450	387	1	+	SK1G00039980	SK1T00039980-RA	1335	--	EAY76573.1 hypothetical protein OsI_04519 [Oryza sativa Indica Group]	-	-	-	-	GO:0016021//integral component of membrane	-	GO:0015886//heme transport;GO:0017004//cytochrome complex assembly	-
IP_peak_724	cluster1	5382593	5383391	799	5382709	42.5	2.45893	3' UTR	cluster1	5380462	5381355	894	1	+	SK1G00039981	SK1T00039981-RA	2247	--	KAF0918550.1 hypothetical protein E2562_025153 [Oryza meyeriana var. granulata] [Oryza meyeriana]	-	-	-	-	-	-	-	-
IP_peak_725	cluster1	5397768	5398182	415	5398037	30	2.78155	Downstream (2-3kb)	cluster1	5394167	5394613	447	1	-	SK1G00039983	SK1T00039983-RA	-3424	--	BAS83147.1 Os03g0236050, partial [Oryza sativa Japonica Group]	-	-	-	-	-	-	-	-
IP_peak_729	cluster1	5438322	5438754	433	5438572	32.5	1.88622	Intron (SK1T00039988-RA/SK1G00039988, intron 2 of 12)	cluster1	5437794	5444715	6922	13	+	SK1G00039988	SK1T00039988-RA	778	LG2	EEC71846.1 hypothetical protein OsI_04511 [Oryza sativa Indica Group]	Environmental Information Processing	Signal transduction	ko04075//Plant hormone signal transduction	K14431	-	GO:0003700//transcription factor activity, sequence-specific DNA binding;GO:0005096//GTPase activator activity;GO:0043565//sequence-specific DNA binding	GO:0006351//transcription, DNA-templated;GO:0006355//regulation of transcription, DNA-templated;GO:0043547//positive regulation of GTPase activity	bZIP
IP_peak_730	cluster1	5471161	5471494	334	5471302	38	2.28669	Intron (SK1T00039992-RA/SK1G00039992, intron 2 of 5)	cluster1	5468304	5472781	4478	6	-	SK1G00039992	SK1T00039992-RA	1479	--	EAY76562.1 hypothetical protein OsI_04508 [Oryza sativa Indica Group]	-	-	-	-	-	GO:0003674//molecular_function;GO:0047570//3-oxoadipate enol-lactonase activity;GO:0070205//2-succinyl-6-hydroxy-2,4-cyclohexadiene-1-carboxylate synthase activity	GO:0009234//menaquinone biosynthetic process;GO:0015979//photosynthesis;GO:0042952//beta-ketoadipate pathway	-
IP_peak_731	cluster1	5484243	5484695	453	5484380	37	2.46109	Promoter (<=1kb)	cluster1	5481680	5483644	1965	2	-	SK1G00039994	SK1T00039994-RA	-736	--	AAG21913.1 putative cyanase [Oryza sativa Japonica Group]	-	-	-	-	GO:0005886//plasma membrane;GO:0016021//integral component of membrane	-	-	-
IP_peak_732	cluster1	5488432	5488908	477	5488656	39.5	2.17428	Downstream (1-2kb)	cluster1	5490312	5491493	1182	1	-	SK1G00039995	SK1T00039995-RA	2837	STLP1	A2WX64.1 RecName: Full=Sialyltransferase-like protein 1 [Oryza sativa Indica Group]	-	-	-	-	-	GO:0008373//sialyltransferase activity	GO:0006486//protein glycosylation	-
IP_peak_733	cluster1	5489638	5490216	579	5489866	38	2.41407	Downstream (<1kb)	cluster1	5490312	5491493	1182	1	-	SK1G00039995	SK1T00039995-RA	1627	STLP1	A2WX64.1 RecName: Full=Sialyltransferase-like protein 1 [Oryza sativa Indica Group]	-	-	-	-	-	GO:0008373//sialyltransferase activity	GO:0006486//protein glycosylation	-
IP_peak_734	cluster1	5494530	5495337	808	5494921	43.5	2.70385	Intron (SK1T00039997-RA/SK1G00039997, intron 4 of 4)	cluster1	5494148	5497384	3237	5	-	SK1G00039997	SK1T00039997-RA	2463	--	EEC71842.1 hypothetical protein OsI_04505 [Oryza sativa Indica Group]	-	-	-	-	-	-	-	-
IP_peak_735	cluster1	5498084	5498519	436	5498212	36.5	2.27941	Intron (SK1T00039998-RA/SK1G00039998, intron 1 of 7)	cluster1	5497430	5501997	4568	8	+	SK1G00039998	SK1T00039998-RA	782	TAF12	XP_015621479.1 transcription initiation factor TFIID subunit 12 [Oryza sativa Japonica Group]	Genetic Information Processing	Transcription	ko03022//Basal transcription factors	K03126	GO:0005669//transcription factor TFIID complex;GO:0005681//spliceosomal complex	GO:0008855//exodeoxyribonuclease VII activity	GO:0000398//mRNA splicing, via spliceosome;GO:0006352//DNA-templated transcription, initiation	-
IP_peak_736	cluster1	5498780	5499090	311	5498921	36.5	2.30706	Intron (SK1T00039998-RA/SK1G00039998, intron 1 of 7)	cluster1	5497430	5501997	4568	8	+	SK1G00039998	SK1T00039998-RA	1491	TAF12	XP_015621479.1 transcription initiation factor TFIID subunit 12 [Oryza sativa Japonica Group]	Genetic Information Processing	Transcription	ko03022//Basal transcription factors	K03126	GO:0005669//transcription factor TFIID complex;GO:0005681//spliceosomal complex	GO:0008855//exodeoxyribonuclease VII activity	GO:0000398//mRNA splicing, via spliceosome;GO:0006352//DNA-templated transcription, initiation	-
IP_peak_737	cluster1	5500138	5500870	733	5500487	43.5	2.82695	Intron (SK1T00039998-RA/SK1G00039998, intron 3 of 7)	cluster1	5497430	5501997	4568	8	+	SK1G00039998	SK1T00039998-RA	3057	TAF12	XP_015621479.1 transcription initiation factor TFIID subunit 12 [Oryza sativa Japonica Group]	Genetic Information Processing	Transcription	ko03022//Basal transcription factors	K03126	GO:0005669//transcription factor TFIID complex;GO:0005681//spliceosomal complex	GO:0008855//exodeoxyribonuclease VII activity	GO:0000398//mRNA splicing, via spliceosome;GO:0006352//DNA-templated transcription, initiation	-
IP_peak_739	cluster1	5554957	5555686	730	5555129	36	2.54225	Exon (SK1T00040005-RA/SK1G00040005, exon 6 of 7)	cluster1	5553918	5558416	4499	7	-	SK1G00040005	SK1T00040005-RA	3287	NAT12	EEC71836.1 hypothetical protein OsI_04495 [Oryza sativa Indica Group]	-	-	-	-	GO:0016020//membrane;GO:0016021//integral component of membrane	GO:0015205//nucleobase transmembrane transporter activity;GO:0022857//transmembrane transporter activity;GO:0042907//xanthine transmembrane transporter activity	GO:0015851//nucleobase transport;GO:0042906//xanthine transport;GO:0055085//transmembrane transport	-
IP_peak_740	cluster1	5556076	5556740	665	5556184	42.5	2.02967	Intron (SK1T00040005-RA/SK1G00040005, intron 3 of 6)	cluster1	5553918	5558416	4499	7	-	SK1G00040005	SK1T00040005-RA	2232	NAT12	EEC71836.1 hypothetical protein OsI_04495 [Oryza sativa Indica Group]	-	-	-	-	GO:0016020//membrane;GO:0016021//integral component of membrane	GO:0015205//nucleobase transmembrane transporter activity;GO:0022857//transmembrane transporter activity;GO:0042907//xanthine transmembrane transporter activity	GO:0015851//nucleobase transport;GO:0042906//xanthine transport;GO:0055085//transmembrane transport	-
IP_peak_741	cluster1	5569064	5569856	793	5569627	44.5	2.63834	Intron (SK1T00040006-RA/SK1G00040006, intron 1 of 4)	cluster1	5568586	5574975	6390	5	+	SK1G00040006	SK1T00040006-RA	1041	GAT1	XP_015620994.1 GABA transporter 1 [Oryza sativa Japonica Group]	-	-	-	-	-	-	-	-
IP_peak_742	cluster1	5571995	5572350	356	5572171	41.5	2.26615	Intron (SK1T00040006-RA/SK1G00040006, intron 2 of 4)	cluster1	5568586	5574975	6390	5	+	SK1G00040006	SK1T00040006-RA	3585	GAT1	XP_015620994.1 GABA transporter 1 [Oryza sativa Japonica Group]	-	-	-	-	-	-	-	-
IP_peak_745	cluster1	5581688	5582168	481	5581821	37.5	3.4657	Promoter (<=1kb)	cluster1	5582611	5584827	2217	5	+	SK1G00040008	SK1T00040008-RA	-790	At5g58770	BAB63702.1 putative undecaprenyl pyrophosphate synthetase [Oryza sativa Japonica Group]	Metabolism;Metabolism	Global and overview maps;Metabolism of terpenoids and polyketides	ko01110//Biosynthesis of secondary metabolites;ko00900//Terpenoid backbone biosynthesis	K11778;K11778	GO:0005737//cytoplasm	GO:0008834//di-trans,poly-cis-decaprenylcistransferase activity;GO:0016765//transferase activity, transferring alkyl or aryl (other than methyl) groups	GO:0009252//peptidoglycan biosynthetic process	-
IP_peak_748	cluster1	5594393	5595213	821	5594729	45	2.73701	Downstream (2-3kb)	cluster1	5597371	5599812	2442	4	-	SK1G00040010	SK1T00040010-RA	5083	--	XP_015620307.1 uncharacterized protein LOC4324752 [Oryza sativa Japonica Group]	-	-	-	-	-	GO:2001070//starch binding	-	-
IP_peak_749	cluster1	5600405	5601118	714	5600932	37	2.60097	Promoter (1-2kb)	cluster1	5597371	5599812	2442	4	-	SK1G00040010	SK1T00040010-RA	-1120	--	XP_015620307.1 uncharacterized protein LOC4324752 [Oryza sativa Japonica Group]	-	-	-	-	-	GO:2001070//starch binding	-	-
IP_peak_750	cluster1	5601363	5602162	800	5601657	47.5	3.2636	Promoter (1-2kb)	cluster1	5597371	5599812	2442	4	-	SK1G00040010	SK1T00040010-RA	-1845	--	XP_015620307.1 uncharacterized protein LOC4324752 [Oryza sativa Japonica Group]	-	-	-	-	-	GO:2001070//starch binding	-	-
IP_peak_751	cluster1	5609321	5610248	928	5610037	41.5	2.30695	Intron (SK1T00040012-RA/SK1G00040012, intron 3 of 8)	cluster1	5607606	5615047	7442	9	+	SK1G00040012	SK1T00040012-RA	2431	NUP62	XP_015613820.1 nuclear pore complex protein NUP62 [Oryza sativa Japonica Group]	Genetic Information Processing	Translation	ko03013//RNA transport	K14306	GO:0005801//cis-Golgi network;GO:0016020//membrane;GO:0031514//motile cilium	GO:0005516//calmodulin binding;GO:0005524//ATP binding	GO:0006886//intracellular protein transport;GO:0007059//chromosome segregation;GO:0030261//chromosome condensation	-
IP_peak_752	cluster1	5612959	5613646	688	5613356	36	2.43526	Intron (SK1T00040012-RA/SK1G00040012, intron 6 of 8)	cluster1	5607606	5615047	7442	9	+	SK1G00040012	SK1T00040012-RA	5750	NUP62	XP_015613820.1 nuclear pore complex protein NUP62 [Oryza sativa Japonica Group]	Genetic Information Processing	Translation	ko03013//RNA transport	K14306	GO:0005801//cis-Golgi network;GO:0016020//membrane;GO:0031514//motile cilium	GO:0005516//calmodulin binding;GO:0005524//ATP binding	GO:0006886//intracellular protein transport;GO:0007059//chromosome segregation;GO:0030261//chromosome condensation	-
IP_peak_753	cluster1	5631066	5631744	679	5631261	34.5	3.00503	Promoter (<=1kb)	cluster1	5632086	5635154	3069	4	+	SK1G00040015	SK1T00040015-RA	-825	--	-	-	-	-	-	-	-	-	-
IP_peak_756	cluster1	5669433	5671454	2022	5670516	34.6666666666667	2.35392666666667	Intron (SK1T00040016-RA/SK1G00040016, intron 11 of 14)	cluster1	5669975	5673235	3261	15	-	SK1G00040016	SK1T00040016-RA	2719	CDC6	Q5N897.1 RecName: Full=Cell division control protein 6 homolog [Oryza sativa Japonica Group]	-	-	-	-	-	GO:0003678//DNA helicase activity;GO:0005524//ATP binding;GO:0016818//hydrolase activity, acting on acid anhydrides, in phosphorus-containing anhydrides;GO:0016887//ATPase activity	GO:0000723//telomere maintenance;GO:0006281//DNA repair;GO:0009306//protein secretion;GO:0032297//negative regulation of DNA-dependent DNA replication initiation	-
IP_peak_757	cluster1	5687980	5688441	462	5688336	41.5	2.21007	Intron (SK1T00040020-RA/SK1G00040020, intron 2 of 2)	cluster1	5687005	5689139	2135	3	-	SK1G00040020	SK1T00040020-RA	803	MYB118	XP_015645142.1 transcription factor MYB73 [Oryza sativa Japonica Group]	-	-	-	-	-	-	-	MYB
IP_peak_758	cluster1	5710554	5711369	816	5710928	35	2.51451	Promoter (<=1kb)	cluster1	5711256	5715414	4159	4	+	SK1G00040023	SK1T00040023-RA	-328	pol	AAX92720.1 retrotransposon protein, putative, unclassified [Oryza sativa Japonica Group]	-	-	-	-	-	GO:0003964//RNA-directed DNA polymerase activity	GO:0000373//Group II intron splicing	-
IP_peak_759	cluster1	5719699	5720118	420	5719953	37.5	2.34436	Promoter (<=1kb)	cluster1	5718130	5719430	1301	3	-	SK1G00040024	SK1T00040024-RA	-523	--	BAD82466.1 hypothetical protein [Oryza sativa Japonica Group]	-	-	-	-	-	-	-	-
IP_peak_761	cluster1	5735124	5735529	406	5735369	33	2.20418	Downstream (2-3kb)	cluster1	5738241	5739878	1638	1	-	SK1G00040026	SK1T00040026-RA	4509	CYP86A1	XP_015631717.1 cytochrome P450 86A1 [Oryza sativa Japonica Group]	Metabolism;Metabolism	Lipid metabolism;Lipid metabolism	ko00071//Fatty acid degradation;ko00073//Cutin, suberine and wax biosynthesis	K15401;K15401	-	GO:0005506//iron ion binding;GO:0016705//oxidoreductase activity, acting on paired donors, with incorporation or reduction of molecular oxygen;GO:0020037//heme binding	GO:0055114//oxidation-reduction process	-
IP_peak_763	cluster1	5754909	5755279	371	5755177	41.5	3.25644	Downstream (<1kb)	cluster1	5755294	5755710	417	1	-	SK1G00040029	SK1T00040029-RA	533	--	XP_015646286.1 josephin-like protein [Oryza sativa Japonica Group]	-	-	-	-	-	-	-	-
IP_peak_764	cluster1	5758588	5759202	615	5758710	37.5	2.75657	Promoter (<=1kb)	cluster1	5759467	5760247	781	3	+	SK1G00040031	SK1T00040031-RA	-757	--	EAY76531.1 hypothetical protein OsI_04474 [Oryza sativa Indica Group]	-	-	-	-	-	-	-	-
IP_peak_766	cluster1	5792400	5793202	803	5792980	43.5	2.07658	Downstream (2-3kb)	cluster1	5795801	5796784	984	1	-	SK1G00040034	SK1T00040034-RA	3804	--	XP_015618803.1 leucine-rich repeat extensin-like protein 3 [Oryza sativa Japonica Group]	-	-	-	-	-	-	-	-
IP_peak_767	cluster1	5808390	5808824	435	5808647	33.5	1.79051	Intron (SK1T00040036-RA/SK1G00040036, intron 6 of 13)	cluster1	5805165	5810906	5742	14	-	SK1G00040036	SK1T00040036-RA	2259	--	EEC71824.1 hypothetical protein OsI_04469 [Oryza sativa Indica Group]	-	-	-	-	-	-	-	-
IP_peak_768	cluster1	5812001	5812540	540	5812212	44	2.36174	Promoter (1-2kb)	cluster1	5805165	5810906	5742	14	-	SK1G00040036	SK1T00040036-RA	-1306	--	EEC71824.1 hypothetical protein OsI_04469 [Oryza sativa Indica Group]	-	-	-	-	-	-	-	-
IP_peak_769	cluster1	5818831	5819280	450	5819017	45.5	2.74718	Intron (SK1T00040037-RA/SK1G00040037, intron 1 of 2)	cluster1	5816845	5820603	3759	3	-	SK1G00040037	SK1T00040037-RA	1586	COI1A	BAF06745.2 Os01g0853400 [Oryza sativa Japonica Group]	Environmental Information Processing	Signal transduction	ko04075//Plant hormone signal transduction	K13463	-	GO:0005515//protein binding	-	-
IP_peak_770	cluster1	5833148	5834072	925	5833604	40.5	2.33188	Exon (SK1T00040039-RA/SK1G00040039, exon 1 of 1)	cluster1	5832867	5834978	2112	1	-	SK1G00040039	SK1T00040039-RA	1374	At3g09060	XP_015616080.1 pentatricopeptide repeat-containing protein At3g09060 isoform X1 [Oryza sativa Japonica Group]	-	-	-	-	GO:0045203//integral component of cell outer membrane	GO:0005215//transporter activity	GO:0015774//polysaccharide transport;GO:0042710//biofilm formation	-
IP_peak_771	cluster1	5842251	5843076	826	5842941	37	2.3266	Intron (SK1T00040040-RA/SK1G00040040, intron 2 of 3)	cluster1	5836679	5845745	9067	4	+	SK1G00040040	SK1T00040040-RA	6262	--	XP_015616088.1 uncharacterized protein LOC4324815 [Oryza sativa Japonica Group]	-	-	-	-	-	-	-	-
IP_peak_772	cluster1	5845344	5845810	467	5845537	30.5	2.06196	Intron (SK1T00040040-RA/SK1G00040040, intron 3 of 3)	cluster1	5836679	5845745	9067	4	+	SK1G00040040	SK1T00040040-RA	8858	--	XP_015616088.1 uncharacterized protein LOC4324815 [Oryza sativa Japonica Group]	-	-	-	-	-	-	-	-
IP_peak_774	cluster1	5870787	5871364	578	5871215	43.5	3.00317	Exon (SK1T00040044-RA/SK1G00040044, exon 5 of 8)	cluster1	5869225	5872800	3576	8	+	SK1G00040044	SK1T00040044-RA	1990	PHT4;3	XP_015620915.1 probable anion transporter 3, chloroplastic [Oryza sativa Japonica Group]	-	-	-	-	GO:0005887//integral component of plasma membrane;GO:0016020//membrane	GO:0008028//monocarboxylic acid transmembrane transporter activity;GO:0015307//drug:proton antiporter activity;GO:0015535//fucose:proton symporter activity;GO:0022857//transmembrane transporter activity;GO:0042910//xenobiotic transporter activity	GO:0006855//drug transmembrane transport;GO:0015718//monocarboxylic acid transport;GO:0015756//fucose transport;GO:0042493//response to drug;GO:0042908//xenobiotic transport;GO:0055085//transmembrane transport	-
IP_peak_775	cluster1	5872434	5873130	697	5872932	53.5	3.53389	Promoter (<=1kb)	cluster1	5873573	5876594	3022	6	+	SK1G00040045	SK1T00040045-RA	-641	CRCK1	XP_015620916.1 calmodulin-binding receptor-like cytoplasmic kinase 2 isoform X1 [Oryza sativa Japonica Group]	-	-	-	-	-	GO:0004672//protein kinase activity;GO:0005524//ATP binding	GO:0006468//protein phosphorylation	-
IP_peak_776	cluster1	5904121	5904624	504	5904370	49	3.09352	Intron (SK1T00040049-RA/SK1G00040049, intron 1 of 4)	cluster1	5901810	5910126	8317	5	+	SK1G00040049	SK1T00040049-RA	2560	Os01g0851400	PWZ31528.1 putative ataxin-3 [Zea mays]	Genetic Information Processing	Folding, sorting and degradation	ko04141//Protein processing in endoplasmic reticulum	K11863	-	GO:0004843//thiol-dependent ubiquitin-specific protease activity	GO:0016579//protein deubiquitination	-
IP_peak_777	cluster1	5905744	5906318	575	5906087	41.5	2.55672	Intron (SK1T00040049-RA/SK1G00040049, intron 2 of 4)	cluster1	5901810	5910126	8317	5	+	SK1G00040049	SK1T00040049-RA	4277	Os01g0851400	PWZ31528.1 putative ataxin-3 [Zea mays]	Genetic Information Processing	Folding, sorting and degradation	ko04141//Protein processing in endoplasmic reticulum	K11863	-	GO:0004843//thiol-dependent ubiquitin-specific protease activity	GO:0016579//protein deubiquitination	-
IP_peak_778	cluster1	5919856	5920430	575	5920134	39	2.22611	3' UTR	cluster1	5923505	5924155	651	1	-	SK1G00040051	SK1T00040051-RA	4021	At3g10130	EEC71815.1 hypothetical protein OsI_04454 [Oryza sativa Indica Group]	-	-	-	-	-	-	-	-
IP_peak_779	cluster1	5920839	5921393	555	5921242	66.5	4.50614	Downstream (2-3kb)	cluster1	5923505	5924155	651	1	-	SK1G00040051	SK1T00040051-RA	2913	At3g10130	EEC71815.1 hypothetical protein OsI_04454 [Oryza sativa Indica Group]	-	-	-	-	-	-	-	-
IP_peak_780	cluster1	5938368	5938726	359	5938509	37.5	2.46929	Promoter (1-2kb)	cluster1	5934001	5936699	2699	6	-	SK1G00040053	SK1T00040053-RA	-1810	LAC7	PWZ31531.1 Laccase-7 [Zea mays]	-	-	-	-	-	GO:0005375//copper ion transmembrane transporter activity;GO:0005507//copper ion binding;GO:0016491//oxidoreductase activity	GO:0006825//copper ion transport;GO:0055114//oxidation-reduction process	-
IP_peak_781	cluster1	5942903	5943557	655	5943223	41.5	2.93135	Intron (SK1T00040053-RB/SK1G00040053, intron 9 of 9)	cluster1	5936664	5952059	15396	10	-	SK1G00040053	SK1T00040053-RB	8836	LAC7	PWZ31531.1 Laccase-7 [Zea mays]	-	-	-	-	-	GO:0005375//copper ion transmembrane transporter activity;GO:0005507//copper ion binding;GO:0016491//oxidoreductase activity	GO:0006825//copper ion transport;GO:0055114//oxidation-reduction process	-
IP_peak_782	cluster1	5946795	5947504	710	5947351	49	2.92576	Intron (SK1T00040053-RB/SK1G00040053, intron 5 of 9)	cluster1	5936664	5952059	15396	10	-	SK1G00040053	SK1T00040053-RB	4708	LAC7	PWZ31531.1 Laccase-7 [Zea mays]	-	-	-	-	-	GO:0005375//copper ion transmembrane transporter activity;GO:0005507//copper ion binding;GO:0016491//oxidoreductase activity	GO:0006825//copper ion transport;GO:0055114//oxidation-reduction process	-
IP_peak_783	cluster1	5948588	5948988	401	5948848	44.5	2.54727	Intron (SK1T00040053-RB/SK1G00040053, intron 3 of 9)	cluster1	5936664	5952059	15396	10	-	SK1G00040053	SK1T00040053-RB	3211	LAC7	PWZ31531.1 Laccase-7 [Zea mays]	-	-	-	-	-	GO:0005375//copper ion transmembrane transporter activity;GO:0005507//copper ion binding;GO:0016491//oxidoreductase activity	GO:0006825//copper ion transport;GO:0055114//oxidation-reduction process	-
IP_peak_784	cluster1	5950088	5950374	287	5950231	81.5	4.79207	Intron (SK1T00040053-RB/SK1G00040053, intron 2 of 9)	cluster1	5936664	5952059	15396	10	-	SK1G00040053	SK1T00040053-RB	1828	LAC7	PWZ31531.1 Laccase-7 [Zea mays]	-	-	-	-	-	GO:0005375//copper ion transmembrane transporter activity;GO:0005507//copper ion binding;GO:0016491//oxidoreductase activity	GO:0006825//copper ion transport;GO:0055114//oxidation-reduction process	-
IP_peak_785	cluster1	5953129	5953639	511	5953475	36	2.14947	Promoter (1-2kb)	cluster1	5936664	5952059	15396	10	-	SK1G00040053	SK1T00040053-RB	-1416	LAC7	PWZ31531.1 Laccase-7 [Zea mays]	-	-	-	-	-	GO:0005375//copper ion transmembrane transporter activity;GO:0005507//copper ion binding;GO:0016491//oxidoreductase activity	GO:0006825//copper ion transport;GO:0055114//oxidation-reduction process	-
IP_peak_786	cluster1	5961024	5961693	670	5961207	70.5	3.45791	Promoter (1-2kb)	cluster1	5962735	5964310	1576	2	+	SK1G00040054	SK1T00040054-RA	-1528	MYB1	EAY76504.1 hypothetical protein OsI_04445 [Oryza sativa Indica Group]	-	-	-	-	GO:0005634//nucleus	GO:0003676//nucleic acid binding;GO:0005524//ATP binding;GO:0016818//hydrolase activity, acting on acid anhydrides, in phosphorus-containing anhydrides	GO:0006338//chromatin remodeling	MYB
IP_peak_788	cluster1	5971301	5971680	380	5971439	43	3.05193	Intron (SK1T00040055-RA/SK1G00040055, intron 1 of 2)	cluster1	5970758	5973946	3189	3	+	SK1G00040055	SK1T00040055-RA	681	--	XP_015623718.1 uncharacterized protein LOC9267992 isoform X1 [Oryza sativa Japonica Group]	-	-	-	-	-	GO:0008270//zinc ion binding	-	-
IP_peak_789	cluster1	5980226	5981331	1106	5980897	49.5	2.96916	Intron (SK1T00040056-RA/SK1G00040056, intron 7 of 11)	cluster1	5979380	5984409	5030	12	-	SK1G00040056	SK1T00040056-RA	3512	ERH1	XP_015622359.1 phosphatidylinositol:ceramide inositolphosphotransferase [Oryza sativa Japonica Group]	-	-	-	-	-	GO:0004347//glucose-6-phosphate isomerase activity	GO:0006094//gluconeogenesis;GO:0006096//glycolytic process	-
IP_peak_790	cluster1	5983125	5983755	631	5983504	33.5	2.04425	Intron (SK1T00040056-RA/SK1G00040056, intron 2 of 11)	cluster1	5979380	5984409	5030	12	-	SK1G00040056	SK1T00040056-RA	905	ERH1	XP_015622359.1 phosphatidylinositol:ceramide inositolphosphotransferase [Oryza sativa Japonica Group]	-	-	-	-	-	GO:0004347//glucose-6-phosphate isomerase activity	GO:0006094//gluconeogenesis;GO:0006096//glycolytic process	-
IP_peak_792	cluster1	5993923	5994962	1040	5994341	123	6.98648	Downstream (<1kb)	cluster1	5994419	5996877	2459	5	-	SK1G00040057	SK1T00040057-RA	2536	--	EAY76501.1 hypothetical protein OsI_04442 [Oryza sativa Indica Group]	-	-	-	-	-	-	-	-
IP_peak_794	cluster1	6014123	6014480	358	6014307	50	3.27723	Promoter (1-2kb)	cluster1	6015760	6016642	883	4	+	SK1G00040058	SK1T00040058-RA	-1453	--	XP_015632009.1 universal stress protein PHOS32 [Oryza sativa Japonica Group]	-	-	-	-	-	-	-	-
IP_peak_795	cluster1	6031101	6031462	362	6031248	35	2.74354	Downstream (<1kb)	cluster1	6031345	6032943	1599	4	-	SK1G00040063	SK1T00040063-RA	1695	--	KAF0920858.1 hypothetical protein E2562_037503 [Oryza meyeriana var. granulata] [Oryza meyeriana]	-	-	-	-	-	-	-	-
IP_peak_796	cluster1	6048141	6048531	391	6048324	43.5	3.48944	Intron (SK1T00040064-RA/SK1G00040064, intron 1 of 1)	cluster1	6047719	6050180	2462	2	+	SK1G00040064	SK1T00040064-RA	605	RAB11C	XP_015624957.1 ras-related protein Rab2BV [Oryza sativa Japonica Group]	-	-	-	-	GO:0005737//cytoplasm	GO:0003924//GTPase activity;GO:0005524//ATP binding;GO:0005525//GTP binding;GO:0017111//nucleoside-triphosphatase activity;GO:0043022//ribosome binding	GO:0006400//tRNA modification;GO:0006576//cellular biogenic amine metabolic process;GO:0008150//biological_process;GO:0042254//ribosome biogenesis	-
IP_peak_798	cluster1	6080381	6080653	273	6080545	41.5	2.17538	Intron (SK1T00040066-RA/SK1G00040066, intron 1 of 3)	cluster1	6079391	6083555	4165	4	+	SK1G00040066	SK1T00040066-RA	1154	BLH9	ABW97410.1 putative transcription factor qSH-1 [Oryza sativa Indica Group]	-	-	-	-	-	GO:0003677//DNA binding	GO:0006355//regulation of transcription, DNA-templated	TALE
IP_peak_800	cluster1	6114087	6115140	1054	6114601	38.5	2.85716	3' UTR	cluster1	6114385	6117936	3552	7	-	SK1G00040069	SK1T00040069-RB	3335	AKR4C10	ACS92968.1 aldo-keto reductase [Oryza sativa Indica Group]	Metabolism;Metabolism;Metabolism;Metabolism;Metabolism	Global and overview maps;Global and overview maps;Carbohydrate metabolism;Lipid metabolism;Carbohydrate metabolism	ko01100//Metabolic pathways;ko01110//Biosynthesis of secondary metabolites;ko00010//Glycolysis / Gluconeogenesis;ko00561//Glycerolipid metabolism;ko00040//Pentose and glucuronate interconversions	K00002;K00002;K00002;K00002;K00002	-	GO:0047834//D-threo-aldose 1-dehydrogenase activity	-	-
IP_peak_801	cluster1	6116107	6116672	566	6116414	34	2.044	Intron (SK1T00040069-RB/SK1G00040069, intron 4 of 6)	cluster1	6114385	6117936	3552	7	-	SK1G00040069	SK1T00040069-RB	1522	AKR4C10	ACS92968.1 aldo-keto reductase [Oryza sativa Indica Group]	Metabolism;Metabolism;Metabolism;Metabolism;Metabolism	Global and overview maps;Global and overview maps;Carbohydrate metabolism;Lipid metabolism;Carbohydrate metabolism	ko01100//Metabolic pathways;ko01110//Biosynthesis of secondary metabolites;ko00010//Glycolysis / Gluconeogenesis;ko00561//Glycerolipid metabolism;ko00040//Pentose and glucuronate interconversions	K00002;K00002;K00002;K00002;K00002	-	GO:0047834//D-threo-aldose 1-dehydrogenase activity	-	-
IP_peak_802	cluster1	6121074	6121861	788	6121246	48	2.93464	3' UTR	cluster1	6117717	6121464	3748	2	-	SK1G00040069	SK1T00040069-RC	218	AKR4C10	ACS92968.1 aldo-keto reductase [Oryza sativa Indica Group]	Metabolism;Metabolism;Metabolism;Metabolism;Metabolism	Global and overview maps;Global and overview maps;Carbohydrate metabolism;Lipid metabolism;Carbohydrate metabolism	ko01100//Metabolic pathways;ko01110//Biosynthesis of secondary metabolites;ko00010//Glycolysis / Gluconeogenesis;ko00561//Glycerolipid metabolism;ko00040//Pentose and glucuronate interconversions	K00002;K00002;K00002;K00002;K00002	-	GO:0047834//D-threo-aldose 1-dehydrogenase activity	-	-
IP_peak_803	cluster1	6129421	6129969	549	6129665	41.5	2.26075	Downstream (<1kb)	cluster1	6127075	6129498	2424	3	+	SK1G00040070	SK1T00040070-RA	2590	OsI_04425	XP_015629876.1 CASP-like protein 5B1 [Oryza sativa Japonica Group]	-	-	-	-	-	-	-	-
IP_peak_804	cluster1	6140747	6142012	1266	6141849	43.5	2.3229	Intron (SK1T00040073-RA/SK1G00040073, intron 6 of 7)	cluster1	6138478	6143227	4750	8	+	SK1G00040073	SK1T00040073-RA	3371	TAF12B	EAY76482.1 hypothetical protein OsI_04423 [Oryza sativa Indica Group]	Genetic Information Processing	Transcription	ko03022//Basal transcription factors	K03126	GO:0005669//transcription factor TFIID complex	-	GO:0006352//DNA-templated transcription, initiation	-
IP_peak_805	cluster1	6142773	6143665	893	6143390	38.6666666666667	2.11423666666667	Downstream (<1kb)	cluster1	6138478	6143227	4750	8	+	SK1G00040073	SK1T00040073-RA	4912	TAF12B	EAY76482.1 hypothetical protein OsI_04423 [Oryza sativa Indica Group]	Genetic Information Processing	Transcription	ko03022//Basal transcription factors	K03126	GO:0005669//transcription factor TFIID complex	-	GO:0006352//DNA-templated transcription, initiation	-
IP_peak_806	cluster1	6147456	6148203	748	6148030	38.5	2.41159	Intron (SK1T00040074-RA/SK1G00040074, intron 1 of 10)	cluster1	6143958	6149560	5603	11	-	SK1G00040074	SK1T00040074-RA	1530	UVR8	KAF2953290.1 hypothetical protein DAI22_01g398401 [Oryza sativa Japonica Group]	-	-	-	-	-	-	-	-
IP_peak_809	cluster1	6156923	6157757	835	6157532	39	2.47225	Intron (SK1T00040075-RA/SK1G00040075, intron 4 of 8)	cluster1	6154974	6160717	5744	9	+	SK1G00040075	SK1T00040075-RA	2558	At2g39750	XP_015643148.1 probable methyltransferase PMT11 [Oryza sativa Japonica Group]	-	-	-	-	-	GO:0008168//methyltransferase activity;GO:0008171//O-methyltransferase activity;GO:0008966//phosphoglucosamine mutase activity	GO:0008299//isoprenoid biosynthetic process;GO:0009102//biotin biosynthetic process;GO:0009103//lipopolysaccharide biosynthetic process;GO:0009252//peptidoglycan biosynthetic process	-
IP_peak_810	cluster1	6159282	6160220	939	6159594	41.5	2.53962	Intron (SK1T00040075-RA/SK1G00040075, intron 7 of 8)	cluster1	6154974	6160717	5744	9	+	SK1G00040075	SK1T00040075-RA	4620	At2g39750	XP_015643148.1 probable methyltransferase PMT11 [Oryza sativa Japonica Group]	-	-	-	-	-	GO:0008168//methyltransferase activity;GO:0008171//O-methyltransferase activity;GO:0008966//phosphoglucosamine mutase activity	GO:0008299//isoprenoid biosynthetic process;GO:0009102//biotin biosynthetic process;GO:0009103//lipopolysaccharide biosynthetic process;GO:0009252//peptidoglycan biosynthetic process	-
IP_peak_812	cluster1	6167523	6168733	1211	6168237	43.5	2.45873	Intron (SK1T00040076-RA/SK1G00040076, intron 9 of 13)	cluster1	6163812	6175829	12018	14	-	SK1G00040076	SK1T00040076-RA	7592	HESO1	XP_025878118.1 protein HESO1 [Oryza sativa Japonica Group]	-	-	-	-	-	-	-	-
IP_peak_813	cluster1	6170661	6171035	375	6170891	56	2.85676	Intron (SK1T00040076-RA/SK1G00040076, intron 9 of 13)	cluster1	6163812	6175829	12018	14	-	SK1G00040076	SK1T00040076-RA	4938	HESO1	XP_025878118.1 protein HESO1 [Oryza sativa Japonica Group]	-	-	-	-	-	-	-	-
IP_peak_814	cluster1	6173414	6174543	1130	6173877	43.5	2.69501	Intron (SK1T00040076-RA/SK1G00040076, intron 2 of 13)	cluster1	6163812	6175829	12018	14	-	SK1G00040076	SK1T00040076-RA	1952	HESO1	XP_025878118.1 protein HESO1 [Oryza sativa Japonica Group]	-	-	-	-	-	-	-	-
IP_peak_818	cluster1	6230837	6231236	400	6231125	40	2.40713	Downstream (1-2kb)	cluster1	6232500	6233261	762	1	-	SK1G00040081	SK1T00040081-RA	2136	PCL1	XP_025878116.1 transcription factor PCL1-like [Oryza sativa Japonica Group]	-	-	-	-	-	GO:0003700//transcription factor activity, sequence-specific DNA binding	GO:0006355//regulation of transcription, DNA-templated	G2-like
IP_peak_819	cluster1	6236376	6236888	513	6236634	38.5	2.16678	Exon (SK1T00040082-RA/SK1G00040082, exon 7 of 10)	cluster1	6234129	6241584	7456	10	-	SK1G00040082	SK1T00040082-RA	4950	APUM1	EAY76473.1 hypothetical protein OsI_04410 [Oryza sativa Indica Group]	-	-	-	-	-	GO:0003723//RNA binding	-	-
IP_peak_820	cluster1	6259740	6260406	667	6260028	37.5	2.22826	Intron (SK1T00040085-RA/SK1G00040085, intron 1 of 6)	cluster1	6258723	6262279	3557	7	+	SK1G00040085	SK1T00040085-RA	1305	PAT16	XP_015650734.1 probable protein S-acyltransferase 16 [Oryza sativa Japonica Group]	-	-	-	-	-	GO:0016409//palmitoyltransferase activity;GO:0016787//hydrolase activity	-	-
IP_peak_821	cluster1	6260686	6261117	432	6260931	33	2.3454	Exon (SK1T00040085-RA/SK1G00040085, exon 6 of 7)	cluster1	6258723	6262279	3557	7	+	SK1G00040085	SK1T00040085-RA	2208	PAT16	XP_015650734.1 probable protein S-acyltransferase 16 [Oryza sativa Japonica Group]	-	-	-	-	-	GO:0016409//palmitoyltransferase activity;GO:0016787//hydrolase activity	-	-
IP_peak_822	cluster1	6303944	6304245	302	6304099	36.5	2.57196	Promoter (1-2kb)	cluster1	6300061	6302697	2637	6	-	SK1G00040092	SK1T00040092-RA	-1402	LAC5	XP_015642298.2 LOW QUALITY PROTEIN: putative laccase-5 [Oryza sativa Japonica Group]	-	-	-	-	-	GO:0005375//copper ion transmembrane transporter activity;GO:0005507//copper ion binding;GO:0016491//oxidoreductase activity	GO:0006825//copper ion transport;GO:0055114//oxidation-reduction process	-
IP_peak_823	cluster1	6305455	6306006	552	6305779	40	2.33993	Downstream (<1kb)	cluster1	6306159	6306440	282	1	-	SK1G00040093	SK1T00040093-RA	661	SMR5	XP_015645240.1 cyclin-dependent protein kinase inhibitor SMR4 [Oryza sativa Japonica Group]	-	-	-	-	GO:0005576//extracellular region;GO:0016021//integral component of membrane	GO:0005179//hormone activity;GO:0005249//voltage-gated potassium channel activity;GO:0030955//potassium ion binding	GO:0006813//potassium ion transport	-
IP_peak_824	cluster1	6310270	6310806	537	6310682	32	2.40694	3' UTR	cluster1	6307450	6308160	711	1	+	SK1G00040094	SK1T00040094-RA	3232	--	AAO65879.1 unknown protein [Oryza sativa Japonica Group]	-	-	-	-	-	-	-	-
IP_peak_825	cluster1	6311276	6312276	1001	6311884	37	2.22527	Intron (SK1T00040095-RA/SK1G00040095, intron 10 of 12)	cluster1	6310628	6317184	6557	13	-	SK1G00040095	SK1T00040095-RA	5300	MIRO1	EEC71783.1 hypothetical protein OsI_04400 [Oryza sativa Indica Group]	-	-	-	-	GO:0005737//cytoplasm	GO:0003924//GTPase activity;GO:0004176//ATP-dependent peptidase activity;GO:0005509//calcium ion binding;GO:0005525//GTP binding;GO:0043022//ribosome binding	GO:0006508//proteolysis;GO:0042254//ribosome biogenesis	-
IP_peak_826	cluster1	6312499	6313819	1321	6313333	48.5	2.87559	5' UTR	cluster1	6310628	6317184	6557	13	-	SK1G00040095	SK1T00040095-RA	3851	MIRO1	EEC71783.1 hypothetical protein OsI_04400 [Oryza sativa Indica Group]	-	-	-	-	GO:0005737//cytoplasm	GO:0003924//GTPase activity;GO:0004176//ATP-dependent peptidase activity;GO:0005509//calcium ion binding;GO:0005525//GTP binding;GO:0043022//ribosome binding	GO:0006508//proteolysis;GO:0042254//ribosome biogenesis	-
IP_peak_828	cluster1	6388613	6389281	669	6388758	98.5	6.559	Intron (SK1T00040100-RA/SK1G00040100, intron 3 of 5)	cluster1	6387904	6390903	3000	6	+	SK1G00040100	SK1T00040100-RA	854	LAC4	XP_015632622.1 laccase-4 [Oryza sativa Japonica Group]	-	-	-	-	-	GO:0005375//copper ion transmembrane transporter activity;GO:0005507//copper ion binding;GO:0016491//oxidoreductase activity	GO:0006825//copper ion transport;GO:0055114//oxidation-reduction process	-
IP_peak_829	cluster1	6394973	6395958	986	6395582	36.3333333333333	1.91421666666667	Exon (SK1T00040101-RA/SK1G00040101, exon 1 of 1)	cluster1	6395453	6397915	2463	1	-	SK1G00040101	SK1T00040101-RA	2333	SCL14	EEC71776.1 hypothetical protein OsI_04388 [Oryza sativa Indica Group]	-	-	-	-	-	-	-	GRAS
IP_peak_830	cluster1	6412850	6413801	952	6413573	46	2.7616	Intron (SK1T00040102-RA/SK1G00040102, intron 5 of 13)	cluster1	6411018	6418642	7625	14	+	SK1G00040102	SK1T00040102-RA	2555	RNR1	XP_015622110.1 ribonuclease II, chloroplastic/mitochondrial [Oryza sativa Japonica Group]	-	-	-	-	-	GO:0003723//RNA binding;GO:0004540//ribonuclease activity;GO:0008859//exoribonuclease II activity;GO:0008997//ribonuclease R activity;GO:0016896//exoribonuclease activity, producing 5'-phosphomonoesters	GO:0006401//RNA catabolic process	-
IP_peak_831	cluster1	6422711	6423434	724	6423178	47.5	2.20018	Promoter (1-2kb)	cluster1	6420666	6421774	1109	5	-	SK1G00040103	SK1T00040103-RA	-1404	ERG1	XP_015616516.1 elicitor-responsive protein 1 [Oryza sativa Japonica Group]	-	-	-	-	-	-	-	-
IP_peak_832	cluster1	6424893	6426421	1529	6425382	43	2.4183	3' UTR	cluster1	6420666	6421774	1109	5	-	SK1G00040103	SK1T00040103-RA	-3608	ERG1	XP_015616516.1 elicitor-responsive protein 1 [Oryza sativa Japonica Group]	-	-	-	-	-	-	-	-
IP_peak_833	cluster1	6429230	6430335	1106	6429721	40	2.43208	Intron (SK1T00040104-RA/SK1G00040104, intron 8 of 15)	cluster1	6425089	6434984	9896	16	-	SK1G00040104	SK1T00040104-RA	5263	MYB3R-2	XP_015616493.1 transcription factor MYB3R-2 [Oryza sativa Japonica Group]	-	-	-	-	GO:0005634//nucleus	GO:0003676//nucleic acid binding;GO:0004807//triose-phosphate isomerase activity;GO:0005524//ATP binding;GO:0016818//hydrolase activity, acting on acid anhydrides, in phosphorus-containing anhydrides	GO:0006096//glycolytic process;GO:0006338//chromatin remodeling	MYB
IP_peak_834	cluster1	6431621	6432229	609	6432065	34	2.27204	Intron (SK1T00040104-RA/SK1G00040104, intron 6 of 15)	cluster1	6425089	6434984	9896	16	-	SK1G00040104	SK1T00040104-RA	2919	MYB3R-2	XP_015616493.1 transcription factor MYB3R-2 [Oryza sativa Japonica Group]	-	-	-	-	GO:0005634//nucleus	GO:0003676//nucleic acid binding;GO:0004807//triose-phosphate isomerase activity;GO:0005524//ATP binding;GO:0016818//hydrolase activity, acting on acid anhydrides, in phosphorus-containing anhydrides	GO:0006096//glycolytic process;GO:0006338//chromatin remodeling	MYB
IP_peak_835	cluster1	6432677	6433497	821	6433047	43	2.96403	Intron (SK1T00040104-RA/SK1G00040104, intron 3 of 15)	cluster1	6425089	6434984	9896	16	-	SK1G00040104	SK1T00040104-RA	1937	MYB3R-2	XP_015616493.1 transcription factor MYB3R-2 [Oryza sativa Japonica Group]	-	-	-	-	GO:0005634//nucleus	GO:0003676//nucleic acid binding;GO:0004807//triose-phosphate isomerase activity;GO:0005524//ATP binding;GO:0016818//hydrolase activity, acting on acid anhydrides, in phosphorus-containing anhydrides	GO:0006096//glycolytic process;GO:0006338//chromatin remodeling	MYB
IP_peak_836	cluster1	6433772	6434242	471	6433958	30.5	2.0818	Intron (SK1T00040104-RA/SK1G00040104, intron 2 of 15)	cluster1	6425089	6434984	9896	16	-	SK1G00040104	SK1T00040104-RA	1026	MYB3R-2	XP_015616493.1 transcription factor MYB3R-2 [Oryza sativa Japonica Group]	-	-	-	-	GO:0005634//nucleus	GO:0003676//nucleic acid binding;GO:0004807//triose-phosphate isomerase activity;GO:0005524//ATP binding;GO:0016818//hydrolase activity, acting on acid anhydrides, in phosphorus-containing anhydrides	GO:0006096//glycolytic process;GO:0006338//chromatin remodeling	MYB
IP_peak_837	cluster1	6438083	6439060	978	6438903	39.5	2.64187	Intron (SK1T00040106-RA/SK1G00040106, intron 5 of 5)	cluster1	6437410	6440203	2794	6	-	SK1G00040106	SK1T00040106-RA	1300	--	EEE55650.1 hypothetical protein OsJ_04033 [Oryza sativa Japonica Group]	-	-	-	-	-	-	-	-
IP_peak_839	cluster1	6456042	6456466	425	6456203	39.5	2.12385	Promoter (1-2kb)	cluster1	6457633	6462574	4942	9	+	SK1G00040108	SK1T00040108-RA	-1430	ESMD1	XP_015627167.1 protein ESMERALDA 1 [Oryza sativa Japonica Group]	-	-	-	-	-	-	-	-
IP_peak_840	cluster1	6458284	6459291	1008	6458457	38	2.60522	Intron (SK1T00040108-RA/SK1G00040108, intron 1 of 8)	cluster1	6457633	6462574	4942	9	+	SK1G00040108	SK1T00040108-RA	824	ESMD1	XP_015627167.1 protein ESMERALDA 1 [Oryza sativa Japonica Group]	-	-	-	-	-	-	-	-
IP_peak_841	cluster1	6461311	6461947	637	6461696	40.5	2.2046	Exon (SK1T00040108-RA/SK1G00040108, exon 6 of 9)	cluster1	6457633	6462574	4942	9	+	SK1G00040108	SK1T00040108-RA	4063	ESMD1	XP_015627167.1 protein ESMERALDA 1 [Oryza sativa Japonica Group]	-	-	-	-	-	-	-	-
IP_peak_842	cluster1	6465619	6466556	938	6465813	34.5	2.28996	Intron (SK1T00040109-RA/SK1G00040109, intron 1 of 1)	cluster1	6464305	6469894	5590	2	+	SK1G00040109	SK1T00040109-RA	1508	FLA4	KAF2953235.1 hypothetical protein DAI22_01g394900 [Oryza sativa Japonica Group]	-	-	-	-	-	-	-	-
IP_peak_843	cluster1	6485044	6485481	438	6485281	44.5	3.72507	Exon (SK1T00040111-RA/SK1G00040111, exon 2 of 2)	cluster1	6483998	6485395	1398	2	+	SK1G00040111	SK1T00040111-RA	1283	RPL36A	XP_015625189.1 60S ribosomal protein L36-3 [Oryza sativa Japonica Group]	Genetic Information Processing	Translation	ko03010//Ribosome	K02920	GO:0005840//ribosome	GO:0003735//structural constituent of ribosome	GO:0006412//translation	-
IP_peak_844	cluster1	6595279	6596005	727	6595447	38	2.17738	Exon (SK1T00040113-RA/SK1G00040113, exon 1 of 1)	cluster1	6593912	6595477	1566	1	+	SK1G00040113	SK1T00040113-RA	1535	--	XP_015621384.1 uncharacterized protein LOC4327389 [Oryza sativa Japonica Group]	-	-	-	-	-	-	-	-
IP_peak_845	cluster1	6631026	6631351	326	6631204	44	2.36315	Intron (SK1T00040116-RA/SK1G00040116, intron 2 of 5)	cluster1	6628027	6634136	6110	6	+	SK1G00040116	SK1T00040116-RA	3177	UBC7	XP_015618097.1 ubiquitin-conjugating enzyme E2 7 [Oryza sativa Japonica Group]	Genetic Information Processing;Genetic Information Processing	Folding, sorting and degradation;Folding, sorting and degradation	ko04141//Protein processing in endoplasmic reticulum;ko04120//Ubiquitin mediated proteolysis	K10575;K10575	-	GO:0005515//protein binding	-	-
IP_peak_846	cluster1	6642922	6643358	437	6643182	43	3.09166	Intron (SK1T00040119-RA/SK1G00040119, intron 3 of 4)	cluster1	6642630	6644271	1642	5	-	SK1G00040119	SK1T00040119-RA	1089	rplQ	XP_015627914.1 uncharacterized protein LOC4327382 [Oryza sativa Japonica Group]	Genetic Information Processing	Translation	ko03010//Ribosome	K02879	GO:0005762//mitochondrial large ribosomal subunit;GO:0005840//ribosome;GO:0022625//cytosolic large ribosomal subunit	GO:0003735//structural constituent of ribosome	GO:0006412//translation	-
IP_peak_848	cluster1	6663398	6664026	629	6663526	42.5	2.78561	Promoter (<=1kb)	cluster1	6664299	6667412	3114	2	+	SK1G00040122	SK1T00040122-RA	-773	At3g55350	EEC71765.1 hypothetical protein OsI_04365 [Oryza sativa Indica Group]	-	-	-	-	-	GO:0003677//DNA binding;GO:0003688//DNA replication origin binding;GO:0003779//actin binding;GO:0005524//ATP binding;GO:0016788//hydrolase activity, acting on ester bonds;GO:0043565//sequence-specific DNA binding	GO:0006270//DNA replication initiation;GO:0006275//regulation of DNA replication;GO:0007010//cytoskeleton organization	-
IP_peak_849	cluster1	6671699	6672200	502	6672012	33	2.32301	Promoter (1-2kb)	cluster1	6667935	6670239	2305	7	-	SK1G00040123	SK1T00040123-RA	-1773	Os01g0838800	EEE55643.1 hypothetical protein OsJ_04013 [Oryza sativa Japonica Group]	-	-	-	-	-	-	-	-
IP_peak_850	cluster1	6693040	6693328	289	6693174	32	1.95176	Promoter (<=1kb)	cluster1	6693555	6693659	105	1	+	SK1G00040126	SK1T00040126-RA	-381	--	KAF2953209.1 hypothetical protein DAI22_01g393100 [Oryza sativa Japonica Group]	-	-	-	-	-	-	-	-
IP_peak_852	cluster1	6721911	6722353	443	6722144	43	2.16884	Intron (SK1T00040130-RA/SK1G00040130, intron 1 of 17)	cluster1	6721431	6733438	12008	18	+	SK1G00040130	SK1T00040130-RA	713	MTP5	EEC71762.1 hypothetical protein OsI_04358 [Oryza sativa Indica Group]	-	-	-	-	GO:0016020//membrane;GO:0016021//integral component of membrane	GO:0004672//protein kinase activity;GO:0005524//ATP binding;GO:0008324//cation transmembrane transporter activity;GO:0015562//efflux transmembrane transporter activity	GO:0006468//protein phosphorylation;GO:0006812//cation transport;GO:0055085//transmembrane transport	-
IP_peak_853	cluster1	6722631	6723224	594	6722829	39	2.10483	Intron (SK1T00040130-RA/SK1G00040130, intron 2 of 17)	cluster1	6721431	6733438	12008	18	+	SK1G00040130	SK1T00040130-RA	1398	MTP5	EEC71762.1 hypothetical protein OsI_04358 [Oryza sativa Indica Group]	-	-	-	-	GO:0016020//membrane;GO:0016021//integral component of membrane	GO:0004672//protein kinase activity;GO:0005524//ATP binding;GO:0008324//cation transmembrane transporter activity;GO:0015562//efflux transmembrane transporter activity	GO:0006468//protein phosphorylation;GO:0006812//cation transport;GO:0055085//transmembrane transport	-
IP_peak_854	cluster1	6723475	6724566	1092	6723790	45.5	2.6483	Intron (SK1T00040130-RA/SK1G00040130, intron 6 of 17)	cluster1	6721431	6733438	12008	18	+	SK1G00040130	SK1T00040130-RA	2359	MTP5	EEC71762.1 hypothetical protein OsI_04358 [Oryza sativa Indica Group]	-	-	-	-	GO:0016020//membrane;GO:0016021//integral component of membrane	GO:0004672//protein kinase activity;GO:0005524//ATP binding;GO:0008324//cation transmembrane transporter activity;GO:0015562//efflux transmembrane transporter activity	GO:0006468//protein phosphorylation;GO:0006812//cation transport;GO:0055085//transmembrane transport	-
IP_peak_855	cluster1	6730790	6731718	929	6731281	43	2.43682	Intron (SK1T00040130-RA/SK1G00040130, intron 15 of 17)	cluster1	6721431	6733438	12008	18	+	SK1G00040130	SK1T00040130-RA	9850	MTP5	EEC71762.1 hypothetical protein OsI_04358 [Oryza sativa Indica Group]	-	-	-	-	GO:0016020//membrane;GO:0016021//integral component of membrane	GO:0004672//protein kinase activity;GO:0005524//ATP binding;GO:0008324//cation transmembrane transporter activity;GO:0015562//efflux transmembrane transporter activity	GO:0006468//protein phosphorylation;GO:0006812//cation transport;GO:0055085//transmembrane transport	-
IP_peak_857	cluster1	6740360	6740773	414	6740580	38.5	2.52613	Intron (SK1T00040132-RA/SK1G00040132, intron 2 of 2)	cluster1	6740387	6741173	787	3	-	SK1G00040132	SK1T00040132-RA	593	--	XP_015629123.1 uncharacterized protein LOC4327369 isoform X1 [Oryza sativa Japonica Group]	-	-	-	-	-	-	-	-
IP_peak_858	cluster1	6748821	6749389	569	6749202	37	2.86305	Intron (SK1T00040133-RA/SK1G00040133, intron 2 of 11)	cluster1	6745132	6750730	5599	12	-	SK1G00040133	SK1T00040133-RA	1528	RIN1	XP_015640454.1 ruvB-like protein 1 [Oryza sativa Japonica Group]	-	-	-	-	GO:0009360//DNA polymerase III complex;GO:0009379//Holliday junction helicase complex	GO:0003678//DNA helicase activity;GO:0003887//DNA-directed DNA polymerase activity;GO:0004222//metalloendopeptidase activity;GO:0004252//serine-type endopeptidase activity;GO:0005198//structural molecule activity;GO:0005524//ATP binding;GO:0009378//four-way junction helicase activity;GO:0016887//ATPase activity	GO:0006260//DNA replication;GO:0006281//DNA repair;GO:0006310//DNA recombination;GO:0006508//proteolysis;GO:0009306//protein secretion;GO:0031412//gas vesicle organization;GO:0051301//cell division	-
IP_peak_859	cluster1	6759923	6760437	515	6760143	29.5	1.937	Intron (SK1T00040135-RA/SK1G00040135, intron 1 of 8)	cluster1	6758402	6760170	1769	9	-	SK1G00040135	SK1T00040135-RA	27	--	EEC71757.1 hypothetical protein OsI_04349 [Oryza sativa Indica Group]	Metabolism;Metabolism	Global and overview maps;Lipid metabolism	ko01100//Metabolic pathways;ko00561//Glycerolipid metabolism	K01054;K01054	-	GO:0003824//catalytic activity;GO:0008236//serine-type peptidase activity;GO:0016787//hydrolase activity;GO:0047570//3-oxoadipate enol-lactonase activity;GO:0070205//2-succinyl-6-hydroxy-2,4-cyclohexadiene-1-carboxylate synthase activity	GO:0006508//proteolysis;GO:0009102//biotin biosynthetic process;GO:0009234//menaquinone biosynthetic process;GO:0042952//beta-ketoadipate pathway	-
IP_peak_860	cluster1	6768576	6769000	425	6768766	38	2.53091	Downstream (2-3kb)	cluster1	6770778	6770966	189	1	-	SK1G00040138	SK1T00040138-RA	2200	--	BAS94332.1 Os05g0452500, partial [Oryza sativa Japonica Group]	-	-	-	-	-	-	-	-
IP_peak_861	cluster1	6769366	6769748	383	6769647	31	1.98267	Downstream (1-2kb)	cluster1	6770778	6770966	189	1	-	SK1G00040138	SK1T00040138-RA	1319	--	BAS94332.1 Os05g0452500, partial [Oryza sativa Japonica Group]	-	-	-	-	-	-	-	-
IP_peak_862	cluster1	6770047	6770695	649	6770415	43	2.99286	Downstream (<1kb)	cluster1	6770778	6770966	189	1	-	SK1G00040138	SK1T00040138-RA	551	--	BAS94332.1 Os05g0452500, partial [Oryza sativa Japonica Group]	-	-	-	-	-	-	-	-
IP_peak_863	cluster1	6772694	6773112	419	6772881	33	2.18208	Promoter (<=1kb)	cluster1	6771526	6772620	1095	1	-	SK1G00040139	SK1T00040139-RA	-261	MAKR4	EAY76415.1 hypothetical protein OsI_04346 [Oryza sativa Indica Group]	-	-	-	-	-	-	-	-
IP_peak_864	cluster1	6774289	6774834	546	6774399	37.5	2.50292	Promoter (1-2kb)	cluster1	6771526	6772620	1095	1	-	SK1G00040139	SK1T00040139-RA	-1779	MAKR4	EAY76415.1 hypothetical protein OsI_04346 [Oryza sativa Indica Group]	-	-	-	-	-	-	-	-
IP_peak_865	cluster1	6782113	6783488	1376	6783219	39.5	2.77373	Promoter (<=1kb)	cluster1	6783734	6784826	1093	2	+	SK1G00040141	SK1T00040141-RA	-515	CAND7	EAY76413.1 hypothetical protein OsI_04344 [Oryza sativa Indica Group]	-	-	-	-	GO:0016021//integral component of membrane	-	-	-
IP_peak_867	cluster1	6803984	6804344	361	6804090	40	2.46354	Intron (SK1T00040144-RA/SK1G00040144, intron 8 of 12)	cluster1	6801438	6811012	9575	13	-	SK1G00040144	SK1T00040144-RA	6922	SAC3A	EEC71756.1 hypothetical protein OsI_04342 [Oryza sativa Indica Group]	-	-	-	-	-	-	-	-
IP_peak_868	cluster1	6808507	6808945	439	6808803	32.5	2.14551	Exon (SK1T00040144-RA/SK1G00040144, exon 2 of 13)	cluster1	6801438	6811012	9575	13	-	SK1G00040144	SK1T00040144-RA	2209	SAC3A	EEC71756.1 hypothetical protein OsI_04342 [Oryza sativa Indica Group]	-	-	-	-	-	-	-	-
IP_peak_869	cluster1	6809928	6810568	641	6810160	44	2.45339	Intron (SK1T00040144-RA/SK1G00040144, intron 1 of 12)	cluster1	6801438	6811012	9575	13	-	SK1G00040144	SK1T00040144-RA	852	SAC3A	EEC71756.1 hypothetical protein OsI_04342 [Oryza sativa Indica Group]	-	-	-	-	-	-	-	-
IP_peak_870	cluster1	6816269	6816549	281	6816382	30	1.96195	Downstream (<1kb)	cluster1	6816814	6817125	312	1	-	SK1G00040145	SK1T00040145-RA	743	At1g07660	XP_016507811.1 PREDICTED: uncharacterized protein LOC107825453 [Nicotiana tabacum]	-	-	-	-	GO:0071821//FANCM-MHF complex	GO:0003677//DNA binding	GO:0006352//DNA-templated transcription, initiation	-
IP_peak_871	cluster1	6822962	6823425	464	6823093	39.5	2.4598	Exon (SK1T00040146-RA/SK1G00040146, exon 2 of 2)	cluster1	6821690	6824471	2782	2	+	SK1G00040146	SK1T00040146-RA	1403	NET2A	EAY76409.1 hypothetical protein OsI_04339 [Oryza sativa Indica Group]	-	-	-	-	GO:0019028//viral capsid;GO:0019031//viral envelope	GO:0003779//actin binding;GO:0005198//structural molecule activity;GO:0005524//ATP binding	GO:0007059//chromosome segregation;GO:0030261//chromosome condensation	-
IP_peak_874	cluster1	6846204	6846926	723	6846440	44	2.36814	3' UTR	cluster1	6843366	6847076	3711	3	+	SK1G00040148	SK1T00040148-RA	3074	--	-	-	-	-	-	-	-	-	-
IP_peak_875	cluster1	6847363	6847827	465	6847606	32	2.20566	Intron (SK1T00040149-RA/SK1G00040149, intron 10 of 12)	cluster1	6846818	6851226	4409	13	-	SK1G00040149	SK1T00040149-RA	3620	RBOHH	XP_015617582.1 putative respiratory burst oxidase homolog protein H [Oryza sativa Japonica Group]	-	-	-	-	-	GO:0004601//peroxidase activity;GO:0005509//calcium ion binding;GO:0016491//oxidoreductase activity;GO:0016655//oxidoreductase activity, acting on NAD(P)H, quinone or similar compound as acceptor;GO:0050664//oxidoreductase activity, acting on NAD(P)H, oxygen as acceptor	GO:0006814//sodium ion transport;GO:0055114//oxidation-reduction process	-
IP_peak_876	cluster1	6880181	6880973	793	6880606	44	2.77192	Intron (SK1T00040151-RA/SK1G00040151, intron 8 of 17)	cluster1	6876594	6886117	9524	18	+	SK1G00040151	SK1T00040151-RA	4012	TBC1D9B	XP_015621935.1 TBC1 domain family member 8B isoform X2 [Oryza sativa Japonica Group]	-	-	-	-	-	GO:0015087//cobalt ion transmembrane transporter activity;GO:0015095//magnesium ion transmembrane transporter activity	GO:0006824//cobalt ion transport;GO:0015693//magnesium ion transport	-
IP_peak_877	cluster1	6883144	6883695	552	6883305	38	2.47457	Intron (SK1T00040151-RA/SK1G00040151, intron 12 of 17)	cluster1	6876594	6886117	9524	18	+	SK1G00040151	SK1T00040151-RA	6711	TBC1D9B	XP_015621935.1 TBC1 domain family member 8B isoform X2 [Oryza sativa Japonica Group]	-	-	-	-	-	GO:0015087//cobalt ion transmembrane transporter activity;GO:0015095//magnesium ion transmembrane transporter activity	GO:0006824//cobalt ion transport;GO:0015693//magnesium ion transport	-
IP_peak_878	cluster1	6898523	6898881	359	6898718	46	2.19854	Intron (SK1T00040155-RA/SK1G00040155, intron 7 of 7)	cluster1	6898168	6902734	4567	8	-	SK1G00040155	SK1T00040155-RA	4016	Os01g0834700	XP_015611509.1 zinc finger CCCH domain-containing protein 11 [Oryza sativa Japonica Group]	-	-	-	-	-	GO:0046872//metal ion binding	-	C3H
IP_peak_879	cluster1	6899463	6899935	473	6899769	36.5	1.99083	Intron (SK1T00040155-RA/SK1G00040155, intron 6 of 7)	cluster1	6898168	6902734	4567	8	-	SK1G00040155	SK1T00040155-RA	2965	Os01g0834700	XP_015611509.1 zinc finger CCCH domain-containing protein 11 [Oryza sativa Japonica Group]	-	-	-	-	-	GO:0046872//metal ion binding	-	C3H
IP_peak_880	cluster1	6900123	6900540	418	6900430	41	2.39703	Intron (SK1T00040155-RA/SK1G00040155, intron 4 of 7)	cluster1	6898168	6902734	4567	8	-	SK1G00040155	SK1T00040155-RA	2304	Os01g0834700	XP_015611509.1 zinc finger CCCH domain-containing protein 11 [Oryza sativa Japonica Group]	-	-	-	-	-	GO:0046872//metal ion binding	-	C3H
IP_peak_881	cluster1	6910257	6910708	452	6910516	40	2.47346	Promoter (1-2kb)	cluster1	6912005	6913481	1477	5	+	SK1G00040157	SK1T00040157-RA	-1489	NFYB2	Q5QMG3.1 RecName: Full=Nuclear transcription factor Y subunit B-2; AltName: Full=OsNF-YB-2; AltName: Full=Transcriptional activator HAP3A [Oryza sativa Japonica Group]	-	-	-	-	GO:0005669//transcription factor TFIID complex	GO:0003677//DNA binding	GO:0006352//DNA-templated transcription, initiation;GO:0006366//transcription from RNA polymerase II promoter	NF-YB
IP_peak_882	cluster1	6940097	6940632	536	6940477	40	2.90267	Downstream (2-3kb)	cluster1	6935651	6936966	1316	4	+	SK1G00040159	SK1T00040159-RA	4826	--	BAS75089.1 Os01g0834250, partial [Oryza sativa Japonica Group]	-	-	-	-	-	-	-	-
IP_peak_883	cluster1	6943142	6943839	698	6943635	40.5	2.751	Intron (SK1T00040160-RA/SK1G00040160, intron 16 of 17)	cluster1	6942609	6953587	10979	18	-	SK1G00040160	SK1T00040160-RA	9952	VHA-a1	XP_015620007.1 V-type proton ATPase subunit a1 [Oryza sativa Japonica Group]	Metabolism;Metabolism;Cellular Processes	Global and overview maps;Energy metabolism;Transport and catabolism	ko01100//Metabolic pathways;ko00190//Oxidative phosphorylation;ko04145//Phagosome	K02154;K02154;K02154	GO:0033179//proton-transporting V-type ATPase, V0 domain	GO:0015078//hydrogen ion transmembrane transporter activity	GO:1902600//hydrogen ion transmembrane transport	-
IP_peak_884	cluster1	6945093	6945932	840	6945707	38.5	2.67163	Exon (SK1T00040160-RA/SK1G00040160, exon 13 of 18)	cluster1	6942609	6953587	10979	18	-	SK1G00040160	SK1T00040160-RA	7880	VHA-a1	XP_015620007.1 V-type proton ATPase subunit a1 [Oryza sativa Japonica Group]	Metabolism;Metabolism;Cellular Processes	Global and overview maps;Energy metabolism;Transport and catabolism	ko01100//Metabolic pathways;ko00190//Oxidative phosphorylation;ko04145//Phagosome	K02154;K02154;K02154	GO:0033179//proton-transporting V-type ATPase, V0 domain	GO:0015078//hydrogen ion transmembrane transporter activity	GO:1902600//hydrogen ion transmembrane transport	-
IP_peak_885	cluster1	6946785	6947364	580	6946951	38.5	2.33408	Exon (SK1T00040160-RA/SK1G00040160, exon 12 of 18)	cluster1	6942609	6953587	10979	18	-	SK1G00040160	SK1T00040160-RA	6636	VHA-a1	XP_015620007.1 V-type proton ATPase subunit a1 [Oryza sativa Japonica Group]	Metabolism;Metabolism;Cellular Processes	Global and overview maps;Energy metabolism;Transport and catabolism	ko01100//Metabolic pathways;ko00190//Oxidative phosphorylation;ko04145//Phagosome	K02154;K02154;K02154	GO:0033179//proton-transporting V-type ATPase, V0 domain	GO:0015078//hydrogen ion transmembrane transporter activity	GO:1902600//hydrogen ion transmembrane transport	-
IP_peak_886	cluster1	6947820	6948341	522	6948014	41.5	2.96978	Intron (SK1T00040160-RA/SK1G00040160, intron 11 of 17)	cluster1	6942609	6953587	10979	18	-	SK1G00040160	SK1T00040160-RA	5573	VHA-a1	XP_015620007.1 V-type proton ATPase subunit a1 [Oryza sativa Japonica Group]	Metabolism;Metabolism;Cellular Processes	Global and overview maps;Energy metabolism;Transport and catabolism	ko01100//Metabolic pathways;ko00190//Oxidative phosphorylation;ko04145//Phagosome	K02154;K02154;K02154	GO:0033179//proton-transporting V-type ATPase, V0 domain	GO:0015078//hydrogen ion transmembrane transporter activity	GO:1902600//hydrogen ion transmembrane transport	-
IP_peak_887	cluster1	6948582	6949632	1051	6949329	37.5	2.6172	Exon (SK1T00040160-RA/SK1G00040160, exon 8 of 18)	cluster1	6942609	6953587	10979	18	-	SK1G00040160	SK1T00040160-RA	4258	VHA-a1	XP_015620007.1 V-type proton ATPase subunit a1 [Oryza sativa Japonica Group]	Metabolism;Metabolism;Cellular Processes	Global and overview maps;Energy metabolism;Transport and catabolism	ko01100//Metabolic pathways;ko00190//Oxidative phosphorylation;ko04145//Phagosome	K02154;K02154;K02154	GO:0033179//proton-transporting V-type ATPase, V0 domain	GO:0015078//hydrogen ion transmembrane transporter activity	GO:1902600//hydrogen ion transmembrane transport	-
IP_peak_888	cluster1	6951414	6952686	1273	6951848	43.3333333333333	2.50923333333333	Intron (SK1T00040160-RA/SK1G00040160, intron 2 of 17)	cluster1	6942609	6953587	10979	18	-	SK1G00040160	SK1T00040160-RA	1739	VHA-a1	XP_015620007.1 V-type proton ATPase subunit a1 [Oryza sativa Japonica Group]	Metabolism;Metabolism;Cellular Processes	Global and overview maps;Energy metabolism;Transport and catabolism	ko01100//Metabolic pathways;ko00190//Oxidative phosphorylation;ko04145//Phagosome	K02154;K02154;K02154	GO:0033179//proton-transporting V-type ATPase, V0 domain	GO:0015078//hydrogen ion transmembrane transporter activity	GO:1902600//hydrogen ion transmembrane transport	-
IP_peak_889	cluster1	6960169	6960992	824	6960356	41	2.27591	Intron (SK1T00040162-RA/SK1G00040162, intron 1 of 3)	cluster1	6959825	6965052	5228	4	+	SK1G00040162	SK1T00040162-RA	531	ICR2	XP_025878096.1 interactor of constitutive active ROPs 2, chloroplastic isoform X2 [Oryza sativa Japonica Group]	-	-	-	-	-	GO:0005524//ATP binding	GO:0007059//chromosome segregation;GO:0030261//chromosome condensation	-
IP_peak_890	cluster1	6964901	6965186	286	6965008	42	2.53914	3' UTR	cluster1	6966078	6966371	294	1	-	SK1G00040163	SK1T00040163-RA	1363	--	BAS77330.1 Os02g0184100 [Oryza sativa Japonica Group]	-	-	-	-	-	-	-	-
IP_peak_891	cluster1	6983893	6984582	690	6984087	48.5	2.29076	Exon (SK1T00040165-RA/SK1G00040165, exon 10 of 11)	cluster1	6977948	6985417	7470	11	+	SK1G00040165	SK1T00040165-RA	6139	Os01g0833700	XP_025878070.1 coatomer subunit delta-3 isoform X1 [Oryza sativa Japonica Group]	-	-	-	-	-	GO:0003677//DNA binding	-	-
IP_peak_892	cluster1	6996569	6997041	473	6996702	37	2.08858	Intron (SK1T00040166-RA/SK1G00040166, intron 5 of 8)	cluster1	6993875	6997766	3892	9	+	SK1G00040166	SK1T00040166-RA	2827	SCPL27	EAY76388.1 hypothetical protein OsI_04319 [Oryza sativa Indica Group]	-	-	-	-	-	GO:0004185//serine-type carboxypeptidase activity	GO:0006508//proteolysis	-
IP_peak_893	cluster1	6998134	6998477	344	6998226	42	2.01402	Downstream (<1kb)	cluster1	6998566	6999226	661	2	-	SK1G00040167	SK1T00040167-RA	1000	At4g08330	XP_015650941.1 uncharacterized protein At4g08330, chloroplastic [Oryza sativa Japonica Group]	-	-	-	-	-	-	-	-
IP_peak_894	cluster1	7004476	7004898	423	7004680	35	1.97447	Promoter (1-2kb)	cluster1	7000083	7003499	3417	3	-	SK1G00040168	SK1T00040168-RA	-1181	--	EEC71748.1 hypothetical protein OsI_04317 [Oryza sativa Indica Group]	-	-	-	-	-	GO:0050385//ureidoglycolate lyase activity	GO:0000256//allantoin catabolic process	-
IP_peak_895	cluster1	7008285	7008690	406	7008487	40	2.36468	Promoter (<=1kb)	cluster1	7009333	7011626	2294	6	+	SK1G00040169	SK1T00040169-RA	-846	ctdspl2	EEC71746.1 hypothetical protein OsI_04315 [Oryza sativa Indica Group]	-	-	-	-	-	-	GO:0006886//intracellular protein transport	-
IP_peak_896	cluster1	7010873	7011471	599	7011186	38	2.08276	Intron (SK1T00040169-RA/SK1G00040169, intron 4 of 5)	cluster1	7009333	7011626	2294	6	+	SK1G00040169	SK1T00040169-RA	1853	ctdspl2	EEC71746.1 hypothetical protein OsI_04315 [Oryza sativa Indica Group]	-	-	-	-	-	-	GO:0006886//intracellular protein transport	-
IP_peak_897	cluster1	7016830	7018181	1352	7017291	40.5	2.98291	Exon (SK1T00040171-RA/SK1G00040171, exon 3 of 8)	cluster1	7014645	7019835	5191	8	-	SK1G00040171	SK1T00040171-RA	2544	pom1	XP_015616076.1 serine/threonine-protein kinase PKH2 [Oryza sativa Japonica Group]	-	-	-	-	-	GO:0004672//protein kinase activity;GO:0005524//ATP binding	GO:0006468//protein phosphorylation	-
IP_peak_899	cluster1	7028895	7029675	781	7029274	43.5	2.95204	Downstream (2-3kb)	cluster1	7032077	7036772	4696	4	-	SK1G00040172	SK1T00040172-RA	7498	At5g05600	XP_015624858.1 probable 2-oxoglutarate-dependent dioxygenase At5g05600 [Oryza sativa Japonica Group]	-	-	-	-	-	GO:0016491//oxidoreductase activity	GO:0055114//oxidation-reduction process	-
IP_peak_900	cluster1	7033939	7034228	290	7034139	30.5	2.08169	Intron (SK1T00040172-RA/SK1G00040172, intron 2 of 3)	cluster1	7032077	7036772	4696	4	-	SK1G00040172	SK1T00040172-RA	2633	At5g05600	XP_015624858.1 probable 2-oxoglutarate-dependent dioxygenase At5g05600 [Oryza sativa Japonica Group]	-	-	-	-	-	GO:0016491//oxidoreductase activity	GO:0055114//oxidation-reduction process	-
IP_peak_901	cluster1	7048662	7050269	1608	7049496	48	2.94346	Intron (SK1T00040173-RA/SK1G00040173, intron 5 of 6)	cluster1	7048919	7054544	5626	7	-	SK1G00040173	SK1T00040173-RA	5048	CPK3	EEC71743.1 hypothetical protein OsI_04311 [Oryza sativa Indica Group]	Organismal Systems	Environmental adaptation	ko04626//Plant-pathogen interaction	K13412	-	GO:0004672//protein kinase activity;GO:0005509//calcium ion binding;GO:0005515//protein binding;GO:0005524//ATP binding	GO:0006468//protein phosphorylation	-
IP_peak_902	cluster1	7055531	7055977	447	7055745	40	2.1564	Promoter (1-2kb)	cluster1	7048919	7054544	5626	7	-	SK1G00040173	SK1T00040173-RA	-1201	CPK3	EEC71743.1 hypothetical protein OsI_04311 [Oryza sativa Indica Group]	Organismal Systems	Environmental adaptation	ko04626//Plant-pathogen interaction	K13412	-	GO:0004672//protein kinase activity;GO:0005509//calcium ion binding;GO:0005515//protein binding;GO:0005524//ATP binding	GO:0006468//protein phosphorylation	-
IP_peak_903	cluster1	7071770	7072371	602	7072052	36.5	2.69034	Intron (SK1T00040176-RA/SK1G00040176, intron 1 of 5)	cluster1	7071174	7074175	3002	6	+	SK1G00040176	SK1T00040176-RA	878	Os01g0832000	XP_015624995.1 probable phytol kinase 2, chloroplastic [Oryza sativa Japonica Group]	Metabolism;Metabolism	Global and overview maps;Metabolism of terpenoids and polyketides	ko01110//Biosynthesis of secondary metabolites;ko00900//Terpenoid backbone biosynthesis	K15892;K15892	-	GO:0005524//ATP binding	-	-
IP_peak_904	cluster1	7072782	7073412	631	7073252	37	2.89441	Intron (SK1T00040176-RA/SK1G00040176, intron 3 of 5)	cluster1	7071174	7074175	3002	6	+	SK1G00040176	SK1T00040176-RA	2078	Os01g0832000	XP_015624995.1 probable phytol kinase 2, chloroplastic [Oryza sativa Japonica Group]	Metabolism;Metabolism	Global and overview maps;Metabolism of terpenoids and polyketides	ko01110//Biosynthesis of secondary metabolites;ko00900//Terpenoid backbone biosynthesis	K15892;K15892	-	GO:0005524//ATP binding	-	-
IP_peak_905	cluster1	7088999	7089870	872	7089611	43	3.21992	Exon (SK1T00040180-RA/SK1G00040180, exon 3 of 4)	cluster1	7088169	7091095	2927	4	-	SK1G00040180	SK1T00040180-RA	1484	BAG4	EEC71739.1 hypothetical protein OsI_04304 [Oryza sativa Indica Group]	-	-	-	-	-	GO:0005515//protein binding;GO:0051087//chaperone binding	-	-
IP_peak_907	cluster1	7132585	7132966	382	7132691	46.5	2.36956	5' UTR	cluster1	7125350	7132731	7382	5	-	SK1G00040183	SK1T00040183-RA	40	ESK1	EAY76370.1 hypothetical protein OsI_04301 [Oryza sativa Indica Group]	-	-	-	-	-	-	-	-
IP_peak_908	cluster1	7134334	7134851	518	7134675	37	2.47691	Promoter (1-2kb)	cluster1	7125350	7132731	7382	5	-	SK1G00040183	SK1T00040183-RA	-1944	ESK1	EAY76370.1 hypothetical protein OsI_04301 [Oryza sativa Indica Group]	-	-	-	-	-	-	-	-
IP_peak_910	cluster1	7154677	7155072	396	7154927	47	3.22119	Intron (SK1T00040185-RA/SK1G00040185, intron 5 of 7)	cluster1	7152635	7157670	5036	8	+	SK1G00040185	SK1T00040185-RA	2292	ZNHIT3	XP_015627289.1 zinc finger HIT domain-containing protein 3 isoform X1 [Oryza sativa Japonica Group]	-	-	-	-	-	-	-	-
IP_peak_911	cluster1	7155358	7155787	430	7155592	34.5	2.2347	Intron (SK1T00040185-RA/SK1G00040185, intron 6 of 7)	cluster1	7152635	7157670	5036	8	+	SK1G00040185	SK1T00040185-RA	2957	ZNHIT3	XP_015627289.1 zinc finger HIT domain-containing protein 3 isoform X1 [Oryza sativa Japonica Group]	-	-	-	-	-	-	-	-
IP_peak_912	cluster1	7156641	7157520	880	7156896	35	2.28572	Intron (SK1T00040185-RA/SK1G00040185, intron 7 of 7)	cluster1	7152635	7157670	5036	8	+	SK1G00040185	SK1T00040185-RA	4261	ZNHIT3	XP_015627289.1 zinc finger HIT domain-containing protein 3 isoform X1 [Oryza sativa Japonica Group]	-	-	-	-	-	-	-	-
IP_peak_913	cluster1	7161026	7161416	391	7161196	45	2.65258	Downstream (2-3kb)	cluster1	7158954	7160639	1686	1	+	SK1G00040186	SK1T00040186-RA	2242	Rnf5	XP_015651015.1 uncharacterized protein LOC9270054 [Oryza sativa Japonica Group]	Genetic Information Processing	Folding, sorting and degradation	ko04141//Protein processing in endoplasmic reticulum	K10666	GO:0000109//nucleotide-excision repair complex;GO:0005680//anaphase-promoting complex	GO:0008270//zinc ion binding;GO:0046872//metal ion binding;GO:0061630//ubiquitin protein ligase activity;GO:0097602//cullin family protein binding	GO:0006289//nucleotide-excision repair;GO:0031145//anaphase-promoting complex-dependent proteasomal ubiquitin-dependent protein catabolic process	-
IP_peak_914	cluster1	7164423	7165799	1377	7164676	38.3333333333333	2.00766333333333	Intron (SK1T00040187-RA/SK1G00040187, intron 5 of 6)	cluster1	7163504	7167176	3673	7	-	SK1G00040187	SK1T00040187-RA	2500	NDA1	BAD73631.1 putative NADH dehydrogenase (ubiquinone) [Oryza sativa Japonica Group]	-	-	-	-	-	GO:0004148//dihydrolipoyl dehydrogenase activity;GO:0004362//glutathione-disulfide reductase activity;GO:0015042//trypanothione-disulfide reductase activity;GO:0016152//mercury (II) reductase activity;GO:0016491//oxidoreductase activity;GO:0045550//geranylgeranyl reductase activity;GO:0050451//CoA-disulfide reductase activity;GO:0050627//mycothione reductase activity;GO:0070402//NADPH binding	GO:0006096//glycolytic process;GO:0010126//mycothiol metabolic process;GO:0015995//chlorophyll biosynthetic process;GO:0030494//bacteriochlorophyll biosynthetic process;GO:0045454//cell redox homeostasis;GO:0046689//response to mercury ion;GO:0051068//dihydrolipoamide metabolic process;GO:0055114//oxidation-reduction process	-
IP_peak_915	cluster1	7168793	7169326	534	7169031	39	2.43511	Exon (SK1T00040188-RA/SK1G00040188, exon 1 of 2)	cluster1	7167673	7170804	3132	2	+	SK1G00040188	SK1T00040188-RA	1358	ABCI8	XP_015651045.1 uncharacterized protein LOC4327425 [Oryza sativa Japonica Group]	-	-	-	-	-	GO:0005198//structural molecule activity	GO:0016226//iron-sulfur cluster assembly	-
IP_peak_916	cluster1	7179141	7179519	379	7179208	32	1.89006	Promoter (<=1kb)	cluster1	7180068	7180259	192	2	+	SK1G00040192	SK1T00040192-RA	-860	--	EAY76360.1 hypothetical protein OsI_04292 [Oryza sativa Indica Group]	-	-	-	-	GO:0005576//extracellular region	GO:0008200//ion channel inhibitor activity;GO:0019871//sodium channel inhibitor activity	GO:0009405//pathogenesis	-
IP_peak_917	cluster1	7185385	7186116	732	7185859	49.5	3.03672	Promoter (<=1kb)	cluster1	7186383	7187245	863	2	+	SK1G00040194	SK1T00040194-RA	-524	--	EAY76358.1 hypothetical protein OsI_04290 [Oryza sativa Indica Group]	-	-	-	-	-	-	-	-
IP_peak_918	cluster1	7201077	7201717	641	7201582	39	2.02336	Downstream (<1kb)	cluster1	7201590	7203784	2195	5	-	SK1G00040197	SK1T00040197-RA	2202	MRL7	XP_025878013.1 thioredoxin-like fold domain-containing protein MRL7 homolog, chloroplastic [Oryza sativa Japonica Group]	-	-	-	-	GO:0005737//cytoplasm	GO:0015036//disulfide oxidoreductase activity	GO:0055114//oxidation-reduction process	-
IP_peak_919	cluster1	7201998	7202925	928	7202749	46	3.26058	Exon (SK1T00040197-RA/SK1G00040197, exon 2 of 5)	cluster1	7201590	7203784	2195	5	-	SK1G00040197	SK1T00040197-RA	1035	MRL7	XP_025878013.1 thioredoxin-like fold domain-containing protein MRL7 homolog, chloroplastic [Oryza sativa Japonica Group]	-	-	-	-	GO:0005737//cytoplasm	GO:0015036//disulfide oxidoreductase activity	GO:0055114//oxidation-reduction process	-
IP_peak_922	cluster1	7226102	7227724	1623	7227196	42	2.64095	Intron (SK1T00040199-RA/SK1G00040199, intron 6 of 7)	cluster1	7226323	7231384	5062	8	-	SK1G00040199	SK1T00040199-RA	4188	At2g40280	EEC71735.1 hypothetical protein OsI_04288 [Oryza sativa Indica Group]	-	-	-	-	-	GO:0008168//methyltransferase activity;GO:0008171//O-methyltransferase activity	GO:0008299//isoprenoid biosynthetic process;GO:0009086//methionine biosynthetic process;GO:0009102//biotin biosynthetic process;GO:0009234//menaquinone biosynthetic process	-
IP_peak_923	cluster1	7238268	7238539	272	7238337	33.5	2.3003	Promoter (1-2kb)	cluster1	7235193	7237154	1962	6	-	SK1G00040201	SK1T00040201-RA	-1183	CCR1	BAD73619.1 putative cinnamoyl-CoA reductase [Oryza sativa Japonica Group]	-	-	-	-	-	GO:0003824//catalytic activity;GO:0003854//3-beta-hydroxy-delta5-steroid dehydrogenase activity;GO:0003978//UDP-glucose 4-epimerase activity;GO:0008446//GDP-mannose 4,6-dehydratase activity;GO:0008460//dTDP-glucose 4,6-dehydratase activity;GO:0008667//2,3-dihydro-2,3-dihydroxybenzoate dehydrogenase activity;GO:0008712//ADP-glyceromanno-heptose 6-epimerase activity;GO:0016616//oxidoreductase activ…	GO:0000271//polysaccharide biosynthetic process;GO:0005975//carbohydrate metabolic process;GO:0006012//galactose metabolic process;GO:0006694//steroid biosynthetic process;GO:0008152//metabolic process;GO:0009243//O antigen biosynthetic process;GO:0009244//lipopolysaccharide core region biosynthetic process;GO:0019305//dTDP-rhamnose biosynthetic process;GO:0055114//oxidation-reduction process	-
IP_peak_925	cluster1	7243818	7244295	478	7243958	37.5	2.2408	Downstream (2-3kb)	cluster1	7246338	7246964	627	1	-	SK1G00040202	SK1T00040202-RA	3006	PYL4	AIX10778.1 ABA receptor 8 [Oryza sativa Indica Group]	Environmental Information Processing;Environmental Information Processing	Signal transduction;Signal transduction	ko04075//Plant hormone signal transduction;ko04016//MAPK signaling pathway - plant	K14496;K14496	-	-	GO:0006952//defense response	-
IP_peak_926	cluster1	7250444	7250980	537	7250777	40	2.24952	Promoter (<=1kb)	cluster1	7250879	7252377	1499	3	+	SK1G00040203	SK1T00040203-RA	-102	At1g58430	KAB8084113.1 hypothetical protein EE612_006590 [Oryza sativa]	-	-	-	-	-	GO:0016788//hydrolase activity, acting on ester bonds	-	-
IP_peak_927	cluster1	7270422	7270700	279	7270592	36	2.49553	Intron (SK1T00040208-RA/SK1G00040208, intron 3 of 4)	cluster1	7268060	7272140	4081	5	+	SK1G00040208	SK1T00040208-RA	2532	SNX2B	XP_025880804.1 uncharacterized protein LOC4327520 [Oryza sativa Japonica Group]	-	-	-	-	-	GO:0035091//phosphatidylinositol binding	-	-
IP_peak_928	cluster1	7278248	7278963	716	7278707	39.5	2.26296	Exon (SK1T00040209-RA/SK1G00040209, exon 3 of 7)	cluster1	7276474	7281965	5492	7	+	SK1G00040209	SK1T00040209-RA	2233	RER6	XP_025880804.1 uncharacterized protein LOC4327520 [Oryza sativa Japonica Group]	-	-	-	-	-	-	-	-
IP_peak_929	cluster1	7286610	7287231	622	7286897	40.5	2.5384	Intron (SK1T00040210-RA/SK1G00040210, intron 1 of 1)	cluster1	7286082	7289299	3218	2	+	SK1G00040210	SK1T00040210-RA	815	--	XP_015642622.1 uncharacterized protein LOC4327519 [Oryza sativa Japonica Group]	-	-	-	-	-	-	-	-
IP_peak_930	cluster1	7292753	7293614	862	7293033	32	2.35297	Intron (SK1T00040211-RA/SK1G00040211, intron 2 of 19)	cluster1	7292314	7303018	10705	20	+	SK1G00040211	SK1T00040211-RA	719	--	EEC71729.1 hypothetical protein OsI_04276 [Oryza sativa Indica Group]	-	-	-	-	-	GO:0008234//cysteine-type peptidase activity	GO:0006508//proteolysis	-
IP_peak_931	cluster1	7299853	7300308	456	7300033	32.5	2.43874	Intron (SK1T00040211-RA/SK1G00040211, intron 18 of 19)	cluster1	7292314	7303018	10705	20	+	SK1G00040211	SK1T00040211-RA	7719	--	EEC71729.1 hypothetical protein OsI_04276 [Oryza sativa Indica Group]	-	-	-	-	-	GO:0008234//cysteine-type peptidase activity	GO:0006508//proteolysis	-
IP_peak_932	cluster1	7302447	7302852	406	7302619	47.5	3.67363	Intron (SK1T00040211-RA/SK1G00040211, intron 19 of 19)	cluster1	7292314	7303018	10705	20	+	SK1G00040211	SK1T00040211-RA	10305	--	EEC71729.1 hypothetical protein OsI_04276 [Oryza sativa Indica Group]	-	-	-	-	-	GO:0008234//cysteine-type peptidase activity	GO:0006508//proteolysis	-
IP_peak_933	cluster1	7310192	7311073	882	7310723	35	2.58779	Exon (SK1T00040212-RA/SK1G00040212, exon 1 of 6)	cluster1	7308122	7310850	2729	6	-	SK1G00040212	SK1T00040212-RA	127	--	KAF2953089.1 hypothetical protein DAI22_01g385100 [Oryza sativa Japonica Group]	-	-	-	-	GO:0009360//DNA polymerase III complex	GO:0003677//DNA binding;GO:0003887//DNA-directed DNA polymerase activity	GO:0006260//DNA replication;GO:0007267//cell-cell signaling	-
IP_peak_934	cluster1	7343352	7343700	349	7343548	39	2.09167	Intron (SK1T00040216-RA/SK1G00040216, intron 7 of 14)	cluster1	7332916	7349005	16090	15	+	SK1G00040216	SK1T00040216-RA	10632	TOL6	KAB8084100.1 hypothetical protein EE612_006571 [Oryza sativa]	-	-	-	-	GO:0005887//integral component of plasma membrane	GO:0015173//aromatic amino acid transmembrane transporter activity	GO:0003333//amino acid transmembrane transport;GO:0006886//intracellular protein transport;GO:0015801//aromatic amino acid transport	-
IP_peak_935	cluster1	7345179	7346421	1243	7345770	31.5	2.18653	Intron (SK1T00040216-RA/SK1G00040216, intron 8 of 14)	cluster1	7332916	7349005	16090	15	+	SK1G00040216	SK1T00040216-RA	12854	TOL6	KAB8084100.1 hypothetical protein EE612_006571 [Oryza sativa]	-	-	-	-	GO:0005887//integral component of plasma membrane	GO:0015173//aromatic amino acid transmembrane transporter activity	GO:0003333//amino acid transmembrane transport;GO:0006886//intracellular protein transport;GO:0015801//aromatic amino acid transport	-
IP_peak_936	cluster1	7351734	7352023	290	7351857	37	2.23204	Intron (SK1T00040217-RA/SK1G00040217, intron 1 of 1)	cluster1	7350719	7353880	3162	2	+	SK1G00040217	SK1T00040217-RA	1138	--	EAY76335.1 hypothetical protein OsI_04269 [Oryza sativa Indica Group]	-	-	-	-	-	-	-	-
IP_peak_938	cluster1	7394190	7394638	449	7394425	49	2.33602	Intron (SK1T00040221-RA/SK1G00040221, intron 1 of 1)	cluster1	7392371	7395386	3016	2	-	SK1G00040221	SK1T00040221-RA	961	--	EAY76330.1 hypothetical protein OsI_04263 [Oryza sativa Indica Group]	-	-	-	-	-	-	-	-
IP_peak_939	cluster1	7400406	7401259	854	7400764	35	2.76567	3' UTR	cluster1	7399863	7402498	2636	3	-	SK1G00040222	SK1T00040222-RA	1734	--	-	-	-	-	-	-	-	-	-
IP_peak_940	cluster1	7407785	7408295	511	7408074	38.5	1.96568	Promoter (1-2kb)	cluster1	7405901	7406892	992	2	-	SK1G00001009	SK1T00001009-RA	-1182	--	EEC71723.1 hypothetical protein OsI_04261 [Oryza sativa Indica Group]	-	-	-	-	-	-	-	-
IP_peak_941	cluster1	7410449	7411202	754	7410662	49.5	2.95135	3' UTR	cluster1	7409013	7411569	2557	2	-	SK1G00040223	SK1T00040223-RA	907	--	EEE55601.1 hypothetical protein OsJ_03914 [Oryza sativa Japonica Group]	-	-	-	-	-	-	-	-
IP_peak_942	cluster1	7412845	7413099	255	7412957	36	2.33421	Promoter (1-2kb)	cluster1	7409013	7411569	2557	2	-	SK1G00040223	SK1T00040223-RA	-1388	--	EEE55601.1 hypothetical protein OsJ_03914 [Oryza sativa Japonica Group]	-	-	-	-	-	-	-	-
IP_peak_943	cluster1	7416983	7417355	373	7417078	31	2.23944	Promoter (<=1kb)	cluster1	7414674	7416114	1441	3	-	SK1G00040224	SK1T00040224-RA	-964	EPFL6	AXR71435.1 hypothetical protein Os01g0824500 [Oryza sativa]	-	-	-	-	-	-	-	-
IP_peak_944	cluster1	7422780	7423253	474	7422957	29.5	2.31214	Promoter (1-2kb)	cluster1	7420978	7421229	252	1	-	SK1G00040225	SK1T00040225-RA	-1728	--	-	-	-	-	-	-	-	-	-
IP_peak_946	cluster1	7453149	7453741	593	7453428	39.5	2.35403	Promoter (1-2kb)	cluster1	7454504	7455817	1314	1	+	SK1G00040228	SK1T00040228-RA	-1076	--	EEC71721.1 hypothetical protein OsI_04256 [Oryza sativa Indica Group]	-	-	-	-	-	-	-	-
IP_peak_947	cluster1	7480628	7481366	739	7480964	37	2.295	Promoter (<=1kb)	cluster1	7477704	7480025	2322	3	-	SK1G00040231	SK1T00040231-RA	-939	--	XP_015622445.1 uncharacterized protein LOC4327571 isoform X1 [Oryza sativa Japonica Group]	-	-	-	-	-	-	-	-
IP_peak_948	cluster1	7483913	7484510	598	7484236	48.5	3.12129	Promoter (1-2kb)	cluster1	7481953	7482750	798	4	-	SK1G00040232	SK1T00040232-RA	-1486	RPS26	KAF2931274.1 hypothetical protein DAI22_05g206100 [Oryza sativa Japonica Group]	Genetic Information Processing	Translation	ko03010//Ribosome	K02976	GO:0005840//ribosome	GO:0003735//structural constituent of ribosome	GO:0006412//translation	-
IP_peak_949	cluster1	7492567	7492870	304	7492704	44	2.63238	Promoter (1-2kb)	cluster1	7489036	7490939	1904	3	-	SK1G00040234	SK1T00040234-RA	-1765	EXPA2	XP_015625064.1 expansin-A2 [Oryza sativa Japonica Group]	-	-	-	-	-	-	-	-
IP_peak_951	cluster1	7514796	7515185	390	7514893	36	2.11668	Downstream (<1kb)	cluster1	7515307	7515504	198	1	-	SK1G00040238	SK1T00040238-RA	611	--	-	-	-	-	-	-	-	-	-
IP_peak_952	cluster1	7545391	7546411	1021	7545966	37.5	2.17354	Promoter (1-2kb)	cluster1	7547923	7548384	462	1	+	SK1G00040240	SK1T00040240-RA	-1957	--	BAS74981.1 Os01g0822001, partial [Oryza sativa Japonica Group]	-	-	-	-	-	-	-	-
IP_peak_955	cluster1	7572374	7573165	792	7572755	37	2.30698	Intron (SK1T00040243-RA/SK1G00040243, intron 10 of 11)	cluster1	7568353	7573581	5229	12	+	SK1G00040243	SK1T00040243-RA	4402	At4g13780	EAY76306.1 hypothetical protein OsI_04241 [Oryza sativa Indica Group]	-	-	-	-	GO:0009328//phenylalanine-tRNA ligase complex	GO:0000049//tRNA binding;GO:0004825//methionine-tRNA ligase activity;GO:0004826//phenylalanine-tRNA ligase activity;GO:0005515//protein binding	GO:0006431//methionyl-tRNA aminoacylation;GO:0006432//phenylalanyl-tRNA aminoacylation;GO:0009306//protein secretion;GO:0050821//protein stabilization	-
IP_peak_956	cluster1	7573635	7573965	331	7573737	42.5	2.35003	Promoter (1-2kb)	cluster1	7574794	7577857	3064	6	+	SK1G00040244	SK1T00040244-RA	-1057	FAX3	EEC71716.1 hypothetical protein OsI_04240 [Oryza sativa Indica Group]	-	-	-	-	GO:0016020//membrane	-	-	-
IP_peak_957	cluster1	7578190	7578795	606	7578493	40	2.33695	3' UTR	cluster1	7577856	7580140	2285	2	-	SK1G00040245	SK1T00040245-RA	1647	WRKY62	EAY76304.1 hypothetical protein OsI_04239 [Oryza sativa Indica Group]	-	-	-	-	-	GO:0003700//transcription factor activity, sequence-specific DNA binding;GO:0043565//sequence-specific DNA binding	GO:0006355//regulation of transcription, DNA-templated	WRKY
IP_peak_959	cluster1	7622259	7622615	357	7622421	48.5	2.87213	Exon (SK1T00040248-RA/SK1G00040248, exon 2 of 3)	cluster1	7620680	7622909	2230	3	-	SK1G00040248	SK1T00040248-RA	488	WRKY62	EAY76301.1 hypothetical protein OsI_04235 [Oryza sativa Indica Group]	-	-	-	-	-	GO:0003700//transcription factor activity, sequence-specific DNA binding;GO:0043565//sequence-specific DNA binding	GO:0006355//regulation of transcription, DNA-templated	WRKY
IP_peak_960	cluster1	7627281	7627763	483	7627615	41.5	2.76336	Downstream (1-2kb)	cluster1	7626504	7626722	219	1	+	SK1G00040249	SK1T00040249-RA	1111	--	BAS74971.1 Os01g0820800 [Oryza sativa Japonica Group]	-	-	-	-	-	-	-	-
IP_peak_961	cluster1	7631204	7632071	868	7631528	39	2.50711	Intron (SK1T00040250-RA/SK1G00040250, intron 1 of 2)	cluster1	7628634	7634962	6329	3	-	SK1G00040250	SK1T00040250-RA	3434	WRKY70	XP_015644112.1 probable WRKY transcription factor 2 [Oryza sativa Japonica Group]	-	-	-	-	-	GO:0003700//transcription factor activity, sequence-specific DNA binding;GO:0043565//sequence-specific DNA binding	GO:0006355//regulation of transcription, DNA-templated;GO:0007224//smoothened signaling pathway	WRKY
IP_peak_962	cluster1	7632317	7633376	1060	7632839	32.6666666666667	2.48256666666667	Intron (SK1T00040250-RA/SK1G00040250, intron 1 of 2)	cluster1	7628634	7634962	6329	3	-	SK1G00040250	SK1T00040250-RA	2123	WRKY70	XP_015644112.1 probable WRKY transcription factor 2 [Oryza sativa Japonica Group]	-	-	-	-	-	GO:0003700//transcription factor activity, sequence-specific DNA binding;GO:0043565//sequence-specific DNA binding	GO:0006355//regulation of transcription, DNA-templated;GO:0007224//smoothened signaling pathway	WRKY
IP_peak_963	cluster1	7634264	7634724	461	7634558	46.5	3.59989	Intron (SK1T00040250-RA/SK1G00040250, intron 1 of 2)	cluster1	7628634	7634962	6329	3	-	SK1G00040250	SK1T00040250-RA	404	WRKY70	XP_015644112.1 probable WRKY transcription factor 2 [Oryza sativa Japonica Group]	-	-	-	-	-	GO:0003700//transcription factor activity, sequence-specific DNA binding;GO:0043565//sequence-specific DNA binding	GO:0006355//regulation of transcription, DNA-templated;GO:0007224//smoothened signaling pathway	WRKY
IP_peak_964	cluster1	7647648	7648153	506	7648013	40	2.80316	Intron (SK1T00040252-RA/SK1G00040252, intron 2 of 2)	cluster1	7646086	7650065	3980	3	-	SK1G00040252	SK1T00040252-RA	2052	WRKY20	EAY76297.1 hypothetical protein OsI_04231 [Oryza sativa Indica Group]	-	-	-	-	-	GO:0003700//transcription factor activity, sequence-specific DNA binding;GO:0043565//sequence-specific DNA binding	GO:0006355//regulation of transcription, DNA-templated	WRKY
IP_peak_965	cluster1	7649372	7649921	550	7649632	47.5	3.66875	Exon (SK1T00040252-RA/SK1G00040252, exon 2 of 3)	cluster1	7646086	7650065	3980	3	-	SK1G00040252	SK1T00040252-RA	433	WRKY20	EAY76297.1 hypothetical protein OsI_04231 [Oryza sativa Indica Group]	-	-	-	-	-	GO:0003700//transcription factor activity, sequence-specific DNA binding;GO:0043565//sequence-specific DNA binding	GO:0006355//regulation of transcription, DNA-templated	WRKY
IP_peak_966	cluster1	7650832	7651569	738	7651248	38.5	2.44402	Promoter (1-2kb)	cluster1	7646086	7650065	3980	3	-	SK1G00040252	SK1T00040252-RA	-1183	WRKY20	EAY76297.1 hypothetical protein OsI_04231 [Oryza sativa Indica Group]	-	-	-	-	-	GO:0003700//transcription factor activity, sequence-specific DNA binding;GO:0043565//sequence-specific DNA binding	GO:0006355//regulation of transcription, DNA-templated	WRKY
IP_peak_968	cluster1	7674079	7674685	607	7674523	32.5	2.05816	Intron (SK1T00040255-RA/SK1G00040255, intron 3 of 20)	cluster1	7672189	7682414	10226	21	+	SK1G00040255	SK1T00040255-RA	2334	scy1	EEC71713.1 hypothetical protein OsI_04229 [Oryza sativa Indica Group]	-	-	-	-	-	GO:0004672//protein kinase activity;GO:0005515//protein binding;GO:0005524//ATP binding	GO:0006468//protein phosphorylation	-
IP_peak_969	cluster1	7675820	7676349	530	7676083	32.5	1.97914	Intron (SK1T00040255-RA/SK1G00040255, intron 6 of 20)	cluster1	7672189	7682414	10226	21	+	SK1G00040255	SK1T00040255-RA	3894	scy1	EEC71713.1 hypothetical protein OsI_04229 [Oryza sativa Indica Group]	-	-	-	-	-	GO:0004672//protein kinase activity;GO:0005515//protein binding;GO:0005524//ATP binding	GO:0006468//protein phosphorylation	-
IP_peak_970	cluster1	7676618	7677901	1284	7676893	45.5	2.28606	Intron (SK1T00040255-RA/SK1G00040255, intron 8 of 20)	cluster1	7672189	7682414	10226	21	+	SK1G00040255	SK1T00040255-RA	4704	scy1	EEC71713.1 hypothetical protein OsI_04229 [Oryza sativa Indica Group]	-	-	-	-	-	GO:0004672//protein kinase activity;GO:0005515//protein binding;GO:0005524//ATP binding	GO:0006468//protein phosphorylation	-
IP_peak_971	cluster1	7678431	7679372	942	7678990	383.5	22.4839	Intron (SK1T00040255-RA/SK1G00040255, intron 16 of 20)	cluster1	7672189	7682414	10226	21	+	SK1G00040255	SK1T00040255-RA	6801	scy1	EEC71713.1 hypothetical protein OsI_04229 [Oryza sativa Indica Group]	-	-	-	-	-	GO:0004672//protein kinase activity;GO:0005515//protein binding;GO:0005524//ATP binding	GO:0006468//protein phosphorylation	-
IP_peak_972	cluster1	7680656	7681170	515	7680836	57.5	3.24858	Intron (SK1T00040255-RA/SK1G00040255, intron 18 of 20)	cluster1	7672189	7682414	10226	21	+	SK1G00040255	SK1T00040255-RA	8647	scy1	EEC71713.1 hypothetical protein OsI_04229 [Oryza sativa Indica Group]	-	-	-	-	-	GO:0004672//protein kinase activity;GO:0005515//protein binding;GO:0005524//ATP binding	GO:0006468//protein phosphorylation	-
IP_peak_974	cluster1	7731801	7732874	1074	7732047	41	3.01241	Intron (SK1T00040262-RA/SK1G00040262, intron 1 of 24)	cluster1	7731677	7742751	11075	25	+	SK1G00040262	SK1T00040262-RA	370	SYT2	KAF0892179.1 hypothetical protein E2562_013532 [Oryza meyeriana var. granulata] [Oryza meyeriana]	-	-	-	-	-	-	-	-
IP_peak_975	cluster1	7735270	7735807	538	7735470	34.5	2.06682	Intron (SK1T00040262-RA/SK1G00040262, intron 8 of 24)	cluster1	7731677	7742751	11075	25	+	SK1G00040262	SK1T00040262-RA	3793	SYT2	KAF0892179.1 hypothetical protein E2562_013532 [Oryza meyeriana var. granulata] [Oryza meyeriana]	-	-	-	-	-	-	-	-
IP_peak_976	cluster1	7737496	7738424	929	7737906	40.5	2.33046	Intron (SK1T00040262-RA/SK1G00040262, intron 13 of 24)	cluster1	7731677	7742751	11075	25	+	SK1G00040262	SK1T00040262-RA	6229	SYT2	KAF0892179.1 hypothetical protein E2562_013532 [Oryza meyeriana var. granulata] [Oryza meyeriana]	-	-	-	-	-	-	-	-
IP_peak_977	cluster1	7740254	7740680	427	7740538	33	1.98354	Exon (SK1T00040262-RA/SK1G00040262, exon 19 of 25)	cluster1	7731677	7742751	11075	25	+	SK1G00040262	SK1T00040262-RA	8861	SYT2	KAF0892179.1 hypothetical protein E2562_013532 [Oryza meyeriana var. granulata] [Oryza meyeriana]	-	-	-	-	-	-	-	-
IP_peak_978	cluster1	7741480	7741975	496	7741573	37	2.23204	Exon (SK1T00040262-RA/SK1G00040262, exon 23 of 25)	cluster1	7731677	7742751	11075	25	+	SK1G00040262	SK1T00040262-RA	9896	SYT2	KAF0892179.1 hypothetical protein E2562_013532 [Oryza meyeriana var. granulata] [Oryza meyeriana]	-	-	-	-	-	-	-	-
IP_peak_979	cluster1	7744178	7744939	762	7744581	33	2.02898	Intron (SK1T00040263-RA/SK1G00040263, intron 2 of 2)	cluster1	7743236	7748268	5033	3	-	SK1G00040263	SK1T00040263-RA	3687	At5g58300	XP_015625966.1 probable inactive receptor kinase At5g58300 [Oryza sativa Japonica Group]	-	-	-	-	-	GO:0004672//protein kinase activity;GO:0005515//protein binding;GO:0005524//ATP binding	GO:0006468//protein phosphorylation	-
IP_peak_980	cluster1	7746503	7746838	336	7746640	39.5	2.3391	Intron (SK1T00040263-RA/SK1G00040263, intron 1 of 2)	cluster1	7743236	7748268	5033	3	-	SK1G00040263	SK1T00040263-RA	1628	At5g58300	XP_015625966.1 probable inactive receptor kinase At5g58300 [Oryza sativa Japonica Group]	-	-	-	-	-	GO:0004672//protein kinase activity;GO:0005515//protein binding;GO:0005524//ATP binding	GO:0006468//protein phosphorylation	-
IP_peak_981	cluster1	7753851	7754158	308	7754030	46.5	2.35506	Exon (SK1T00040264-RA/SK1G00040264, exon 4 of 5)	cluster1	7752261	7756713	4453	5	-	SK1G00040264	SK1T00040264-RA	2683	--	EEC71708.1 hypothetical protein OsI_04220 [Oryza sativa Indica Group]	-	-	-	-	-	-	-	-
IP_peak_982	cluster1	7754955	7755270	316	7755132	46	2.41333	Promoter (1-2kb)	cluster1	7756371	7759569	3199	2	+	SK1G00040265	SK1T00040265-RA	-1239	--	BAD73352.1 unknown protein [Oryza sativa Japonica Group]	-	-	-	-	-	-	-	-
IP_peak_983	cluster1	7755801	7756225	425	7755993	47.5	2.51458	Promoter (<=1kb)	cluster1	7756371	7759569	3199	2	+	SK1G00040265	SK1T00040265-RA	-378	--	BAD73352.1 unknown protein [Oryza sativa Japonica Group]	-	-	-	-	-	-	-	-
IP_peak_984	cluster1	7766838	7767714	877	7767441	50.5	2.91016	Intron (SK1T00040266-RA/SK1G00040266, intron 4 of 20)	cluster1	7764347	7776711	12365	21	+	SK1G00040266	SK1T00040266-RA	3094	At1g06840	XP_015620925.1 probable LRR receptor-like serine/threonine-protein kinase At1g06840 isoform X1 [Oryza sativa Japonica Group]	-	-	-	-	-	GO:0004672//protein kinase activity;GO:0005515//protein binding;GO:0005524//ATP binding	GO:0006468//protein phosphorylation	-
IP_peak_985	cluster1	7772356	7772910	555	7772569	38.5	2.39723	Exon (SK1T00040266-RA/SK1G00040266, exon 15 of 21)	cluster1	7764347	7776711	12365	21	+	SK1G00040266	SK1T00040266-RA	8222	At1g06840	XP_015620925.1 probable LRR receptor-like serine/threonine-protein kinase At1g06840 isoform X1 [Oryza sativa Japonica Group]	-	-	-	-	-	GO:0004672//protein kinase activity;GO:0005515//protein binding;GO:0005524//ATP binding	GO:0006468//protein phosphorylation	-
IP_peak_986	cluster1	7774574	7775211	638	7774762	46.5	3.06182	Exon (SK1T00040266-RA/SK1G00040266, exon 17 of 21)	cluster1	7764347	7776711	12365	21	+	SK1G00040266	SK1T00040266-RA	10415	At1g06840	XP_015620925.1 probable LRR receptor-like serine/threonine-protein kinase At1g06840 isoform X1 [Oryza sativa Japonica Group]	-	-	-	-	-	GO:0004672//protein kinase activity;GO:0005515//protein binding;GO:0005524//ATP binding	GO:0006468//protein phosphorylation	-
IP_peak_987	cluster1	7788937	7789796	860	7789396	45	2.53495	Downstream (<1kb)	cluster1	7790160	7793030	2871	7	-	SK1G00040268	SK1T00040268-RA	3634	SPIN1	XP_015625212.1 KH domain-containing protein SPIN1-like [Oryza sativa Japonica Group]	-	-	-	-	-	GO:0003723//RNA binding	-	-
IP_peak_990	cluster1	7803192	7803974	783	7803786	46.5	2.87263	Promoter (<=1kb)	cluster1	7801986	7803411	1426	2	-	SK1G00040270	SK1T00040270-RA	-375	--	XP_015621089.1 uncharacterized protein LOC107275876 [Oryza sativa Japonica Group]	-	-	-	-	-	-	-	-
IP_peak_991	cluster1	7807781	7808304	524	7808066	62.5	3.76681	Exon (SK1T00040271-RA/SK1G00040271, exon 9 of 12)	cluster1	7806460	7811248	4789	12	-	SK1G00040271	SK1T00040271-RA	3182	PILS6	XP_015621088.1 protein PIN-LIKES 6 [Oryza sativa Japonica Group]	-	-	-	-	GO:0016021//integral component of membrane	-	GO:0055085//transmembrane transport	-
IP_peak_992	cluster1	7810160	7810506	347	7810296	97.5	4.91078	Intron (SK1T00040271-RA/SK1G00040271, intron 1 of 11)	cluster1	7806460	7811248	4789	12	-	SK1G00040271	SK1T00040271-RA	952	PILS6	XP_015621088.1 protein PIN-LIKES 6 [Oryza sativa Japonica Group]	-	-	-	-	GO:0016021//integral component of membrane	-	GO:0055085//transmembrane transport	-
IP_peak_994	cluster1	7817362	7817971	610	7817494	37	1.94201	Downstream (<1kb)	cluster1	7806460	7811248	4789	12	-	SK1G00040271	SK1T00040271-RA	-6246	PILS6	XP_015621088.1 protein PIN-LIKES 6 [Oryza sativa Japonica Group]	-	-	-	-	GO:0016021//integral component of membrane	-	GO:0055085//transmembrane transport	-
IP_peak_995	cluster1	7828688	7829381	694	7829186	46	2.58042	Intron (SK1T00040274-RA/SK1G00040274, intron 6 of 9)	cluster1	7827886	7831593	3708	10	-	SK1G00040274	SK1T00040274-RA	2407	PGM1	EEC71703.1 hypothetical protein OsI_04213 [Oryza sativa Indica Group]	Metabolism;Metabolism;Metabolism;Metabolism;Metabolism;Metabolism	Global and overview maps;Global and overview maps;Global and overview maps;Global and overview maps;Carbohydrate metabolism;Amino acid metabolism	ko01100//Metabolic pathways;ko01110//Biosynthesis of secondary metabolites;ko01200//Carbon metabolism;ko01230//Biosynthesis of amino acids;ko00010//Glycolysis / Gluconeogenesis;ko00260//Glycine, serine and threonine metabolism	K15633;K15633;K15633;K15633;K15633;K15633	GO:0005737//cytoplasm	GO:0003824//catalytic activity;GO:0004619//phosphoglycerate mutase activity;GO:0030145//manganese ion binding;GO:0046537//2,3-bisphosphoglycerate-independent phosphoglycerate mutase activity;GO:0046872//metal ion binding	GO:0006007//glucose catabolic process;GO:0006094//gluconeogenesis;GO:0006096//glycolytic process	-
IP_peak_996	cluster1	7837414	7837721	308	7837565	49	3.03869	Downstream (1-2kb)	cluster1	7839093	7839326	234	1	-	SK1G00040276	SK1T00040276-RA	1761	--	BAT16495.1 Os12g0239300, partial [Oryza sativa Japonica Group]	-	-	-	-	-	-	-	-
IP_peak_997	cluster1	7854961	7856571	1611	7855500	42.5	2.74143	Intron (SK1T00040279-RA/SK1G00040279, intron 2 of 10)	cluster1	7854085	7862773	8689	11	+	SK1G00040279	SK1T00040279-RA	1415	GIP	CAH67713.1 H0512B01.8 [Oryza sativa]	Genetic Information Processing	Transcription	ko03020//RNA polymerase	K03006	GO:0016021//integral component of membrane	GO:0003676//nucleic acid binding;GO:0008270//zinc ion binding	GO:0015074//DNA integration	-
IP_peak_998	cluster1	7856842	7857422	581	7857108	39	2.9835	Exon (SK1T00040279-RA/SK1G00040279, exon 7 of 11)	cluster1	7854085	7862773	8689	11	+	SK1G00040279	SK1T00040279-RA	3023	GIP	CAH67713.1 H0512B01.8 [Oryza sativa]	Genetic Information Processing	Transcription	ko03020//RNA polymerase	K03006	GO:0016021//integral component of membrane	GO:0003676//nucleic acid binding;GO:0008270//zinc ion binding	GO:0015074//DNA integration	-
IP_peak_999	cluster1	7864954	7865843	890	7865765	37.5	2.38478	Intron (SK1T00040280-RA/SK1G00040280, intron 1 of 3)	cluster1	7863422	7866899	3478	4	-	SK1G00040280	SK1T00040280-RA	1134	--	AAV32162.1 unknown protein [Oryza sativa Japonica Group]	-	-	-	-	-	-	-	-
IP_peak_1001	cluster1	7889954	7890430	477	7890328	34	2.5904	Downstream (<1kb)	cluster1	7890664	7892531	1868	3	-	SK1G00040282	SK1T00040282-RA	2203	Bp10	XP_015635630.1 L-ascorbate oxidase homolog [Oryza sativa Japonica Group]	Metabolism;Metabolism	Global and overview maps;Carbohydrate metabolism	ko01100//Metabolic pathways;ko00053//Ascorbate and aldarate metabolism	K00423;K00423	-	GO:0005375//copper ion transmembrane transporter activity;GO:0005507//copper ion binding;GO:0016491//oxidoreductase activity	GO:0006825//copper ion transport;GO:0055114//oxidation-reduction process	-
IP_peak_1002	cluster1	7898631	7898943	313	7898792	34	2.48644	Intron (SK1T00040284-RA/SK1G00040284, intron 8 of 18)	cluster1	7895699	7900823	5125	19	-	SK1G00040284	SK1T00040284-RA	2031	At5g49770	EAY76270.1 hypothetical protein OsI_04206 [Oryza sativa Indica Group]	-	-	-	-	-	GO:0004672//protein kinase activity;GO:0005515//protein binding;GO:0005524//ATP binding	GO:0006468//protein phosphorylation	-
IP_peak_1003	cluster1	7901058	7901479	422	7901350	35.5	2.48544	Promoter (<=1kb)	cluster1	7895699	7900823	5125	19	-	SK1G00040284	SK1T00040284-RA	-527	At5g49770	EAY76270.1 hypothetical protein OsI_04206 [Oryza sativa Indica Group]	-	-	-	-	-	GO:0004672//protein kinase activity;GO:0005515//protein binding;GO:0005524//ATP binding	GO:0006468//protein phosphorylation	-
IP_peak_1004	cluster1	7905635	7906114	480	7905785	36	2.44848	Intron (SK1T00040285-RA/SK1G00040285, intron 3 of 7)	cluster1	7904326	7906846	2521	8	+	SK1G00040285	SK1T00040285-RA	1459	MOR1	XP_025877808.1 protein MOR1-like isoform X1 [Oryza sativa Japonica Group]	-	-	-	-	-	GO:0005515//protein binding	-	-
IP_peak_1005	cluster1	7907626	7908825	1200	7908221	40.5	2.43811	Downstream (<1kb)	cluster1	7908699	7908998	300	1	-	SK1G00040286	SK1T00040286-RA	777	--	BAF04210.1 Os01g0196800 [Oryza sativa Japonica Group]	-	-	-	-	GO:0008537//proteasome activator complex	-	-	-
IP_peak_1006	cluster1	7916513	7917347	835	7917202	49	2.47218	Promoter (1-2kb)	cluster1	7918435	7935277	16843	52	+	SK1G00040287	SK1T00040287-RA	-1233	MOR1	KAB8084022.1 hypothetical protein EE612_006462 [Oryza sativa]	-	-	-	-	GO:0000221//vacuolar proton-transporting V-type ATPase, V1 domain	GO:0004674//protein serine/threonine kinase activity;GO:0005515//protein binding	GO:1902600//hydrogen ion transmembrane transport	-
IP_peak_1007	cluster1	7921330	7922626	1297	7921583	38.5	2.56155	Intron (SK1T00040287-RA/SK1G00040287, intron 6 of 51)	cluster1	7918435	7935277	16843	52	+	SK1G00040287	SK1T00040287-RA	3148	MOR1	KAB8084022.1 hypothetical protein EE612_006462 [Oryza sativa]	-	-	-	-	GO:0000221//vacuolar proton-transporting V-type ATPase, V1 domain	GO:0004674//protein serine/threonine kinase activity;GO:0005515//protein binding	GO:1902600//hydrogen ion transmembrane transport	-
IP_peak_1008	cluster1	7922878	7923292	415	7923281	33.5	1.69701	Intron (SK1T00040287-RA/SK1G00040287, intron 11 of 51)	cluster1	7918435	7935277	16843	52	+	SK1G00040287	SK1T00040287-RA	4846	MOR1	KAB8084022.1 hypothetical protein EE612_006462 [Oryza sativa]	-	-	-	-	GO:0000221//vacuolar proton-transporting V-type ATPase, V1 domain	GO:0004674//protein serine/threonine kinase activity;GO:0005515//protein binding	GO:1902600//hydrogen ion transmembrane transport	-
IP_peak_1009	cluster1	7923755	7924087	333	7924002	36	2.46639	Intron (SK1T00040287-RA/SK1G00040287, intron 14 of 51)	cluster1	7918435	7935277	16843	52	+	SK1G00040287	SK1T00040287-RA	5567	MOR1	KAB8084022.1 hypothetical protein EE612_006462 [Oryza sativa]	-	-	-	-	GO:0000221//vacuolar proton-transporting V-type ATPase, V1 domain	GO:0004674//protein serine/threonine kinase activity;GO:0005515//protein binding	GO:1902600//hydrogen ion transmembrane transport	-
IP_peak_1010	cluster1	7924715	7925048	334	7924901	30	2.08619	Intron (SK1T00040287-RA/SK1G00040287, intron 17 of 51)	cluster1	7918435	7935277	16843	52	+	SK1G00040287	SK1T00040287-RA	6466	MOR1	KAB8084022.1 hypothetical protein EE612_006462 [Oryza sativa]	-	-	-	-	GO:0000221//vacuolar proton-transporting V-type ATPase, V1 domain	GO:0004674//protein serine/threonine kinase activity;GO:0005515//protein binding	GO:1902600//hydrogen ion transmembrane transport	-
IP_peak_1011	cluster1	7925705	7926113	409	7925828	35	2.3882	Intron (SK1T00040287-RA/SK1G00040287, intron 18 of 51)	cluster1	7918435	7935277	16843	52	+	SK1G00040287	SK1T00040287-RA	7393	MOR1	KAB8084022.1 hypothetical protein EE612_006462 [Oryza sativa]	-	-	-	-	GO:0000221//vacuolar proton-transporting V-type ATPase, V1 domain	GO:0004674//protein serine/threonine kinase activity;GO:0005515//protein binding	GO:1902600//hydrogen ion transmembrane transport	-
IP_peak_1012	cluster1	7929777	7930510	734	7930250	36.5	2.24272	Intron (SK1T00040287-RA/SK1G00040287, intron 34 of 51)	cluster1	7918435	7935277	16843	52	+	SK1G00040287	SK1T00040287-RA	11815	MOR1	KAB8084022.1 hypothetical protein EE612_006462 [Oryza sativa]	-	-	-	-	GO:0000221//vacuolar proton-transporting V-type ATPase, V1 domain	GO:0004674//protein serine/threonine kinase activity;GO:0005515//protein binding	GO:1902600//hydrogen ion transmembrane transport	-
IP_peak_1013	cluster1	7953587	7953906	320	7953833	41.5	2.52761	Exon (SK1T00040290-RA/SK1G00040290, exon 2 of 2)	cluster1	7951264	7954870	3607	2	+	SK1G00040290	SK1T00040290-RA	2569	PCMP-E28	EAZ13934.1 hypothetical protein OsJ_03861 [Oryza sativa Japonica Group]	-	-	-	-	-	-	GO:0006886//intracellular protein transport;GO:0016192//vesicle-mediated transport	-
IP_peak_1014	cluster1	7957010	7957707	698	7957560	46	2.53106	Intron (SK1T00040291-RA/SK1G00040291, intron 4 of 8)	cluster1	7955367	7962807	7441	9	-	SK1G00040291	SK1T00040291-RA	5247	VAR3	EEC71698.1 hypothetical protein OsI_04199 [Oryza sativa Indica Group]	-	-	-	-	-	-	-	-
IP_peak_1015	cluster1	7960416	7961745	1330	7960812	41.6666666666667	2.45202666666667	Exon (SK1T00040291-RA/SK1G00040291, exon 4 of 9)	cluster1	7955367	7962807	7441	9	-	SK1G00040291	SK1T00040291-RA	1995	VAR3	EEC71698.1 hypothetical protein OsI_04199 [Oryza sativa Indica Group]	-	-	-	-	-	-	-	-
IP_peak_1018	cluster1	7986814	7987590	777	7987195	46	2.57468	Intron (SK1T00040294-RA/SK1G00040294, intron 5 of 8)	cluster1	7985744	7989158	3415	9	+	SK1G00040294	SK1T00040294-RA	1451	CBR1	XP_015634676.1 NADH--cytochrome b5 reductase 1 [Oryza sativa Japonica Group]	Metabolism	Carbohydrate metabolism	ko00520//Amino sugar and nucleotide sugar metabolism	K00326	-	GO:0004846//urate oxidase activity;GO:0009055//electron carrier activity;GO:0016002//sulfite reductase activity;GO:0016491//oxidoreductase activity;GO:0016655//oxidoreductase activity, acting on NAD(P)H, quinone or similar compound as acceptor	GO:0006790//sulfur compound metabolic process;GO:0006814//sodium ion transport;GO:0010124//phenylacetate catabolic process;GO:0019628//urate catabolic process;GO:0055114//oxidation-reduction process	-
IP_peak_1019	cluster1	7995744	7996325	582	7996192	42	2.39717	Intron (SK1T00040296-RA/SK1G00040296, intron 2 of 4)	cluster1	7994832	7997982	3151	5	+	SK1G00040296	SK1T00040296-RA	1360	SKIP24	EEC71696.1 hypothetical protein OsI_04194 [Oryza sativa Indica Group]	-	-	-	-	GO:0005634//nucleus;GO:0070449//elongin complex	GO:0005515//protein binding;GO:0005524//ATP binding;GO:0008855//exodeoxyribonuclease VII activity	GO:0006368//transcription elongation from RNA polymerase II promoter;GO:0007059//chromosome segregation;GO:0030261//chromosome condensation	-
IP_peak_1020	cluster1	8006333	8007094	762	8006593	40	2.67242	Intron (SK1T00040299-RA/SK1G00040299, intron 1 of 9)	cluster1	8006044	8010524	4481	10	+	SK1G00040299	SK1T00040299-RA	549	IP5P10	XP_015622451.1 type I inositol polyphosphate 5-phosphatase 10 isoform X2 [Oryza sativa Japonica Group]	-	-	-	-	-	-	-	-
IP_peak_1021	cluster1	8021986	8022313	328	8022160	38.5	2.46606	Promoter (1-2kb)	cluster1	8017379	8020758	3380	6	-	SK1G00040301	SK1T00040301-RA	-1402	--	KAB8084002.1 hypothetical protein EE612_006437 [Oryza sativa]	Genetic Information Processing	Translation	ko03015//mRNA surveillance pathway	K14404	-	-	-	-
IP_peak_1022	cluster1	8023285	8023752	468	8023384	32.5	2.29809	Intron (SK1T00040302-RA/SK1G00040302, intron 9 of 12)	cluster1	8022039	8028418	6380	13	-	SK1G00040302	SK1T00040302-RA	5034	AGD14	EAY76254.1 hypothetical protein OsI_04189 [Oryza sativa Indica Group]	-	-	-	-	-	GO:0005096//GTPase activator activity;GO:0008270//zinc ion binding	-	-
IP_peak_1023	cluster1	8026242	8026785	544	8026623	41.5	2.60911	Intron (SK1T00040302-RA/SK1G00040302, intron 2 of 12)	cluster1	8022039	8028418	6380	13	-	SK1G00040302	SK1T00040302-RA	1795	AGD14	EAY76254.1 hypothetical protein OsI_04189 [Oryza sativa Indica Group]	-	-	-	-	-	GO:0005096//GTPase activator activity;GO:0008270//zinc ion binding	-	-
IP_peak_1024	cluster1	8027606	8028007	402	8027804	40.5	2.53639	Intron (SK1T00040302-RA/SK1G00040302, intron 1 of 12)	cluster1	8022039	8028418	6380	13	-	SK1G00040302	SK1T00040302-RA	614	AGD14	EAY76254.1 hypothetical protein OsI_04189 [Oryza sativa Indica Group]	-	-	-	-	-	GO:0005096//GTPase activator activity;GO:0008270//zinc ion binding	-	-
IP_peak_1025	cluster1	8032414	8033251	838	8033043	36.5	2.42467	Exon (SK1T00040303-RA/SK1G00040303, exon 8 of 13)	cluster1	8030026	8035505	5480	13	+	SK1G00040303	SK1T00040303-RA	3017	BGLU3	XP_015626437.2 beta-glucosidase 3 [Oryza sativa Japonica Group]	Metabolism;Metabolism;Metabolism;Metabolism;Metabolism	Global and overview maps;Global and overview maps;Biosynthesis of other secondary metabolites;Carbohydrate metabolism;Metabolism of other amino acids	ko01100//Metabolic pathways;ko01110//Biosynthesis of secondary metabolites;ko00940//Phenylpropanoid biosynthesis;ko00500//Starch and sucrose metabolism;ko00460//Cyanoamino acid metabolism	K01188;K01188;K01188;K01188;K01188	GO:0009341//beta-galactosidase complex	GO:0004553//hydrolase activity, hydrolyzing O-glycosyl compounds;GO:0004565//beta-galactosidase activity	GO:0005975//carbohydrate metabolic process;GO:0006012//galactose metabolic process;GO:0071704//organic substance metabolic process	-
IP_peak_1026	cluster1	8033488	8034091	604	8033894	46.5	3.00314	Intron (SK1T00040303-RA/SK1G00040303, intron 10 of 12)	cluster1	8030026	8035505	5480	13	+	SK1G00040303	SK1T00040303-RA	3868	BGLU3	XP_015626437.2 beta-glucosidase 3 [Oryza sativa Japonica Group]	Metabolism;Metabolism;Metabolism;Metabolism;Metabolism	Global and overview maps;Global and overview maps;Biosynthesis of other secondary metabolites;Carbohydrate metabolism;Metabolism of other amino acids	ko01100//Metabolic pathways;ko01110//Biosynthesis of secondary metabolites;ko00940//Phenylpropanoid biosynthesis;ko00500//Starch and sucrose metabolism;ko00460//Cyanoamino acid metabolism	K01188;K01188;K01188;K01188;K01188	GO:0009341//beta-galactosidase complex	GO:0004553//hydrolase activity, hydrolyzing O-glycosyl compounds;GO:0004565//beta-galactosidase activity	GO:0005975//carbohydrate metabolic process;GO:0006012//galactose metabolic process;GO:0071704//organic substance metabolic process	-
IP_peak_1027	cluster1	8048709	8049497	789	8049100	46	2.7218	Exon (SK1T00040305-RA/SK1G00040305, exon 3 of 8)	cluster1	8047500	8050316	2817	8	+	SK1G00040305	SK1T00040305-RA	1600	VPS36	EEC71690.1 hypothetical protein OsI_04182 [Oryza sativa Indica Group]	Cellular Processes	Transport and catabolism	ko04144//Endocytosis	K12190	-	GO:0004045//aminoacyl-tRNA hydrolase activity;GO:0005198//structural molecule activity;GO:0032266//phosphatidylinositol-3-phosphate binding;GO:0043130//ubiquitin binding	GO:0006412//translation;GO:0071973//bacterial-type flagellum-dependent cell motility	-
IP_peak_1028	cluster1	8052577	8052966	390	8052760	42	2.64499	Exon (SK1T00040306-RA/SK1G00040306, exon 3 of 7)	cluster1	8050852	8054222	3371	7	-	SK1G00040306	SK1T00040306-RA	1462	Os01g0813400	XP_015618373.1 ADP-ribosylation factor 1 [Oryza sativa Japonica Group]	Cellular Processes	Transport and catabolism	ko04144//Endocytosis	K07937	GO:0048501//signal recognition particle, plasma membrane targeting	GO:0003873//6-phosphofructo-2-kinase activity;GO:0003924//GTPase activity;GO:0005048//signal sequence binding;GO:0005524//ATP binding;GO:0005525//GTP binding;GO:0019001//guanyl nucleotide binding;GO:0031683//G-protein beta/gamma-subunit complex binding	GO:0006000//fructose metabolic process;GO:0007186//G-protein coupled receptor signaling pathway;GO:0009306//protein secretion;GO:0042254//ribosome biogenesis	-
IP_peak_1029	cluster1	8067153	8068554	1402	8068024	41	2.52191	Intron (SK1T00040308-RA/SK1G00040308, intron 2 of 2)	cluster1	8066397	8068999	2603	3	+	SK1G00040308	SK1T00040308-RA	1627	DPBF3	XP_015627754.1 ABSCISIC ACID-INSENSITIVE 5-like protein 2 [Oryza sativa Japonica Group]	Environmental Information Processing	Signal transduction	ko04075//Plant hormone signal transduction	K14432	-	GO:0003677//DNA binding;GO:0003700//transcription factor activity, sequence-specific DNA binding	GO:0006355//regulation of transcription, DNA-templated	bZIP
IP_peak_1030	cluster1	8068773	8069514	742	8069041	43	2.83447	Promoter (1-2kb)	cluster1	8070448	8073834	3387	6	+	SK1G00001107	SK1T00001107-RA	-1407	HINT1	EEE55566.1 hypothetical protein OsJ_03841 [Oryza sativa Japonica Group]	-	-	-	-	-	-	-	-
IP_peak_1031	cluster1	8070667	8070994	328	8070810	44	2.63831	Intron (SK1T00001107-RA/SK1G00001107, intron 1 of 5)	cluster1	8070448	8073834	3387	6	+	SK1G00001107	SK1T00001107-RA	362	HINT1	EEE55566.1 hypothetical protein OsJ_03841 [Oryza sativa Japonica Group]	-	-	-	-	-	-	-	-
IP_peak_1032	cluster1	8079542	8080257	716	8079754	36.5	2.30712	Promoter (1-2kb)	cluster1	8080783	8081076	294	1	+	SK1G00040310	SK1T00040310-RA	-1029	--	BAS74887.1 Os01g0812850 [Oryza sativa Japonica Group]	-	-	-	-	-	-	-	-
IP_peak_1033	cluster1	8080993	8081647	655	8081523	39	2.33332	Promoter (<=1kb)	cluster1	8082249	8084000	1752	4	+	SK1G00040311	SK1T00040311-RA	-726	RPL30	XP_015633083.1 60S ribosomal protein L30 [Oryza sativa Japonica Group]	Genetic Information Processing	Translation	ko03010//Ribosome	K02908	-	-	-	-
IP_peak_1034	cluster1	8083138	8083908	771	8083444	34.5	2.25868	Intron (SK1T00040311-RA/SK1G00040311, intron 1 of 3)	cluster1	8082249	8084000	1752	4	+	SK1G00040311	SK1T00040311-RA	1195	RPL30	XP_015633083.1 60S ribosomal protein L30 [Oryza sativa Japonica Group]	Genetic Information Processing	Translation	ko03010//Ribosome	K02908	-	-	-	-
IP_peak_1035	cluster1	8111759	8112334	576	8112096	34	2.06856	3' UTR	cluster1	8106238	8107176	939	1	-	SK1G00040314	SK1T00040314-RA	-4920	NHL13	EAY76236.1 hypothetical protein OsI_04172 [Oryza sativa Indica Group]	-	-	-	-	-	-	-	-
IP_peak_1036	cluster1	8115912	8116360	449	8116059	44	2.64695	Exon (SK1T00040315-RA/SK1G00040315, exon 2 of 3)	cluster1	8111714	8117503	5790	3	-	SK1G00040315	SK1T00040315-RA	1444	--	KAB8083986.1 hypothetical protein EE612_006418 [Oryza sativa]	-	-	-	-	-	-	GO:0000469//cleavage involved in rRNA processing	-
IP_peak_1037	cluster1	8121573	8122639	1067	8121888	35.5	1.9725	Intron (SK1T00040316-RA/SK1G00040316, intron 1 of 2)	cluster1	8120185	8123187	3003	3	-	SK1G00040316	SK1T00040316-RA	1299	GAM1	CAA67000.1 transcription factor GAMyb [Oryza sativa Indica Group]	-	-	-	-	GO:0005634//nucleus	GO:0003676//nucleic acid binding;GO:0005524//ATP binding;GO:0016818//hydrolase activity, acting on acid anhydrides, in phosphorus-containing anhydrides	GO:0006338//chromatin remodeling	MYB
IP_peak_1038	cluster1	8144993	8146400	1408	8145974	40	2.8227	Intron (SK1T00040318-RA/SK1G00040318, intron 2 of 6)	cluster1	8144313	8148244	3932	7	+	SK1G00040318	SK1T00040318-RA	1661	ARAD1	EAY76230.1 hypothetical protein OsI_04166 [Oryza sativa Indica Group]	-	-	-	-	-	-	-	-
IP_peak_1039	cluster1	8150881	8151259	379	8151093	38	2.11947	Exon (SK1T00040319-RA/SK1G00040319, exon 1 of 1)	cluster1	8150636	8152846	2211	1	-	SK1G00040319	SK1T00040319-RA	1753	SUVH1	EAY76229.1 hypothetical protein OsI_04165 [Oryza sativa Indica Group]	Metabolism;Metabolism	Global and overview maps;Amino acid metabolism	ko01100//Metabolic pathways;ko00310//Lysine degradation	K11420;K11420	GO:0005634//nucleus	GO:0005515//protein binding;GO:0008270//zinc ion binding;GO:0018024//histone-lysine N-methyltransferase activity	GO:0034968//histone lysine methylation	-
IP_peak_1040	cluster1	8162255	8162805	551	8162558	34	2.0069	Intron (SK1T00040321-RA/SK1G00040321, intron 1 of 10)	cluster1	8158535	8163023	4489	11	-	SK1G00040321	SK1T00040321-RA	465	PAG1	XP_015644254.1 proteasome subunit alpha type-3 [Oryza sativa Japonica Group]	Genetic Information Processing	Folding, sorting and degradation	ko03050//Proteasome	K02727	GO:0000502//proteasome complex;GO:0005839//proteasome core complex;GO:0019773//proteasome core complex, alpha-subunit complex	GO:0004175//endopeptidase activity;GO:0004298//threonine-type endopeptidase activity	GO:0006511//ubiquitin-dependent protein catabolic process;GO:0010498//proteasomal protein catabolic process;GO:0051603//proteolysis involved in cellular protein catabolic process	-
IP_peak_1041	cluster1	8165628	8166244	617	8165814	42	2.53455	Promoter (1-2kb)	cluster1	8166868	8205382	38515	47	+	SK1G00040322	SK1T00040322-RA	-1054	At1g51810	EEC71681.1 hypothetical protein OsI_04158 [Oryza sativa Indica Group]	-	-	-	-	-	GO:0003674//molecular_function;GO:0004222//metalloendopeptidase activity;GO:0004672//protein kinase activity;GO:0005515//protein binding;GO:0005524//ATP binding	GO:0006468//protein phosphorylation;GO:0009306//protein secretion	-
IP_peak_1042	cluster1	8171636	8172642	1007	8172115	37.5	2.25786	Intron (SK1T00040322-RA/SK1G00040322, intron 8 of 46)	cluster1	8166868	8205382	38515	47	+	SK1G00040322	SK1T00040322-RA	5247	At1g51810	EEC71681.1 hypothetical protein OsI_04158 [Oryza sativa Indica Group]	-	-	-	-	-	GO:0003674//molecular_function;GO:0004222//metalloendopeptidase activity;GO:0004672//protein kinase activity;GO:0005515//protein binding;GO:0005524//ATP binding	GO:0006468//protein phosphorylation;GO:0009306//protein secretion	-
IP_peak_1043	cluster1	8179239	8180084	846	8179582	40.5	2.25468	Intron (SK1T00040322-RA/SK1G00040322, intron 13 of 46)	cluster1	8166868	8205382	38515	47	+	SK1G00040322	SK1T00040322-RA	12714	At1g51810	EEC71681.1 hypothetical protein OsI_04158 [Oryza sativa Indica Group]	-	-	-	-	-	GO:0003674//molecular_function;GO:0004222//metalloendopeptidase activity;GO:0004672//protein kinase activity;GO:0005515//protein binding;GO:0005524//ATP binding	GO:0006468//protein phosphorylation;GO:0009306//protein secretion	-
IP_peak_1044	cluster1	8183247	8184172	926	8183619	40.5	2.86009	Exon (SK1T00040322-RA/SK1G00040322, exon 20 of 47)	cluster1	8166868	8205382	38515	47	+	SK1G00040322	SK1T00040322-RA	16751	At1g51810	EEC71681.1 hypothetical protein OsI_04158 [Oryza sativa Indica Group]	-	-	-	-	-	GO:0003674//molecular_function;GO:0004222//metalloendopeptidase activity;GO:0004672//protein kinase activity;GO:0005515//protein binding;GO:0005524//ATP binding	GO:0006468//protein phosphorylation;GO:0009306//protein secretion	-
IP_peak_1045	cluster1	8185255	8186143	889	8185544	36.5	2.89281	Intron (SK1T00040322-RA/SK1G00040322, intron 23 of 46)	cluster1	8166868	8205382	38515	47	+	SK1G00040322	SK1T00040322-RA	18676	At1g51810	EEC71681.1 hypothetical protein OsI_04158 [Oryza sativa Indica Group]	-	-	-	-	-	GO:0003674//molecular_function;GO:0004222//metalloendopeptidase activity;GO:0004672//protein kinase activity;GO:0005515//protein binding;GO:0005524//ATP binding	GO:0006468//protein phosphorylation;GO:0009306//protein secretion	-
IP_peak_1046	cluster1	8199952	8200454	503	8200116	35.5	2.48159	Intron (SK1T00040322-RA/SK1G00040322, intron 34 of 46)	cluster1	8166868	8205382	38515	47	+	SK1G00040322	SK1T00040322-RA	33248	At1g51810	EEC71681.1 hypothetical protein OsI_04158 [Oryza sativa Indica Group]	-	-	-	-	-	GO:0003674//molecular_function;GO:0004222//metalloendopeptidase activity;GO:0004672//protein kinase activity;GO:0005515//protein binding;GO:0005524//ATP binding	GO:0006468//protein phosphorylation;GO:0009306//protein secretion	-
IP_peak_1048	cluster1	8220126	8220623	498	8220356	46.5	2.58822	Intron (SK1T00040324-RA/SK1G00040324, intron 1 of 3)	cluster1	8219137	8223147	4011	4	+	SK1G00040324	SK1T00040324-RA	1219	RNC1	XP_015648830.1 ribonuclease III domain-containing protein RNC1, chloroplastic [Oryza sativa Japonica Group]	-	-	-	-	-	GO:0004525//ribonuclease III activity	GO:0006396//RNA processing	-
IP_peak_1051	cluster1	8286498	8287025	528	8286762	38.5	2.32574	Intron (SK1T00040330-RA/SK1G00040330, intron 5 of 5)	cluster1	8286392	8290221	3830	6	-	SK1G00040330	SK1T00040330-RA	3459	LRR1	XP_015648898.1 leucine-rich repeat protein 1 [Oryza sativa Japonica Group]	Metabolism;Metabolism	Global and overview maps;Carbohydrate metabolism	ko01100//Metabolic pathways;ko00650//Butanoate metabolism	K00109;K00109	-	GO:0005515//protein binding	-	-
IP_peak_1052	cluster1	8289003	8289613	611	8289147	32	2.05197	Intron (SK1T00040330-RA/SK1G00040330, intron 2 of 5)	cluster1	8286392	8290221	3830	6	-	SK1G00040330	SK1T00040330-RA	1074	LRR1	XP_015648898.1 leucine-rich repeat protein 1 [Oryza sativa Japonica Group]	Metabolism;Metabolism	Global and overview maps;Carbohydrate metabolism	ko01100//Metabolic pathways;ko00650//Butanoate metabolism	K00109;K00109	-	GO:0005515//protein binding	-	-
IP_peak_1055	cluster1	8356601	8356921	321	8356734	37	2.37454	Intron (SK1T00040335-RA/SK1G00040335, intron 2 of 10)	cluster1	8355436	8361478	6043	11	+	SK1G00040335	SK1T00040335-RA	1298	TGAL1	EEC71673.1 hypothetical protein OsI_04142 [Oryza sativa Indica Group]	Environmental Information Processing	Signal transduction	ko04075//Plant hormone signal transduction	K14431	-	GO:0003700//transcription factor activity, sequence-specific DNA binding;GO:0043565//sequence-specific DNA binding	GO:0006351//transcription, DNA-templated;GO:0006355//regulation of transcription, DNA-templated	bZIP
IP_peak_1056	cluster1	8358038	8358887	850	8358332	44.5	3.34584	Intron (SK1T00040335-RA/SK1G00040335, intron 7 of 10)	cluster1	8355436	8361478	6043	11	+	SK1G00040335	SK1T00040335-RA	2896	TGAL1	EEC71673.1 hypothetical protein OsI_04142 [Oryza sativa Indica Group]	Environmental Information Processing	Signal transduction	ko04075//Plant hormone signal transduction	K14431	-	GO:0003700//transcription factor activity, sequence-specific DNA binding;GO:0043565//sequence-specific DNA binding	GO:0006351//transcription, DNA-templated;GO:0006355//regulation of transcription, DNA-templated	bZIP
IP_peak_1057	cluster1	8360769	8361849	1081	8361265	35	2.41171	Intron (SK1T00040335-RA/SK1G00040335, intron 10 of 10)	cluster1	8355436	8361478	6043	11	+	SK1G00040335	SK1T00040335-RA	5829	TGAL1	EEC71673.1 hypothetical protein OsI_04142 [Oryza sativa Indica Group]	Environmental Information Processing	Signal transduction	ko04075//Plant hormone signal transduction	K14431	-	GO:0003700//transcription factor activity, sequence-specific DNA binding;GO:0043565//sequence-specific DNA binding	GO:0006351//transcription, DNA-templated;GO:0006355//regulation of transcription, DNA-templated	bZIP
IP_peak_1058	cluster1	8368246	8368619	374	8368422	39	2.04192	Promoter (<=1kb)	cluster1	8368596	8371928	3333	1	+	SK1G00040337	SK1T00040337-RA	-174	RGA1	XP_015651137.1 putative disease resistance protein RGA4 [Oryza sativa Japonica Group]	-	-	-	-	-	GO:0005515//protein binding;GO:0043531//ADP binding	-	-
IP_peak_1059	cluster1	8368889	8369668	780	8369282	39	2.37096	Exon (SK1T00040337-RA/SK1G00040337, exon 1 of 1)	cluster1	8368596	8371928	3333	1	+	SK1G00040337	SK1T00040337-RA	686	RGA1	XP_015651137.1 putative disease resistance protein RGA4 [Oryza sativa Japonica Group]	-	-	-	-	-	GO:0005515//protein binding;GO:0043531//ADP binding	-	-
IP_peak_1062	cluster1	8464269	8464600	332	8464526	39	1.70417	Downstream (<1kb)	cluster1	8465214	8466295	1082	2	-	SK1G00040344	SK1T00040344-RA	1769	--	-	-	-	-	-	-	-	-	-
IP_peak_1063	cluster1	8478999	8479394	396	8479245	44	3.11892	Intron (SK1T00040346-RA/SK1G00040346, intron 4 of 7)	cluster1	8478364	8481859	3496	8	+	SK1G00040346	SK1T00040346-RA	881	RBL20	XP_015649731.1 rhomboid-like protein 20 [Oryza sativa Japonica Group]	-	-	-	-	GO:0005887//integral component of plasma membrane;GO:0016021//integral component of membrane	GO:0004252//serine-type endopeptidase activity;GO:0043130//ubiquitin binding	GO:0006289//nucleotide-excision repair;GO:0006464//cellular protein modification process	-
IP_peak_1064	cluster1	8479741	8481290	1550	8480350	55.5	3.86801	Intron (SK1T00040346-RA/SK1G00040346, intron 5 of 7)	cluster1	8478364	8481859	3496	8	+	SK1G00040346	SK1T00040346-RA	1986	RBL20	XP_015649731.1 rhomboid-like protein 20 [Oryza sativa Japonica Group]	-	-	-	-	GO:0005887//integral component of plasma membrane;GO:0016021//integral component of membrane	GO:0004252//serine-type endopeptidase activity;GO:0043130//ubiquitin binding	GO:0006289//nucleotide-excision repair;GO:0006464//cellular protein modification process	-
IP_peak_1067	cluster1	8488344	8488704	361	8488508	30	1.98042	Intron (SK1T00040347-RA/SK1G00040347, intron 2 of 3)	cluster1	8486310	8490162	3853	4	-	SK1G00040347	SK1T00040347-RA	1654	TUBB4	EEC71666.1 hypothetical protein OsI_04129 [Oryza sativa Indica Group]	Cellular Processes	Transport and catabolism	ko04145//Phagosome	K07375	-	GO:0003924//GTPase activity	GO:0000910//cytokinesis	-
IP_peak_1068	cluster1	8493628	8494027	400	8493842	42.5	2.54547	Intron (SK1T00040348-RA/SK1G00040348, intron 3 of 3)	cluster1	8491595	8494241	2647	4	+	SK1G00040348	SK1T00040348-RA	2247	NRPB5A	XP_015649715.1 DNA-directed RNA polymerases II and IV subunit 5A [Oryza sativa Japonica Group]	Genetic Information Processing	Transcription	ko03020//RNA polymerase	K03013	-	GO:0003677//DNA binding;GO:0003899//DNA-directed RNA polymerase activity;GO:0004519//endonuclease activity	GO:0006351//transcription, DNA-templated;GO:0009307//DNA restriction-modification system	-
IP_peak_1069	cluster1	8499537	8500670	1134	8500104	44	2.53518	Exon (SK1T00040349-RA/SK1G00040349, exon 5 of 12)	cluster1	8497331	8503946	6616	12	+	SK1G00040349	SK1T00040349-RA	2773	SCAB1	XP_015621581.1 stomatal closure-related actin-binding protein 1 [Oryza sativa Japonica Group]	-	-	-	-	-	GO:0003779//actin binding	-	-
IP_peak_1070	cluster1	8525991	8526294	304	8526138	31.5	2.31271	Intron (SK1T00040355-RA/SK1G00040355, intron 1 of 1)	cluster1	8525597	8527433	1837	2	+	SK1G00040355	SK1T00040355-RA	541	RPL34	XP_015614884.1 50S ribosomal protein L34, chloroplastic [Oryza sativa Japonica Group]	Genetic Information Processing	Translation	ko03010//Ribosome	K02914	GO:0000315//organellar large ribosomal subunit;GO:0005840//ribosome;GO:0022625//cytosolic large ribosomal subunit	GO:0003735//structural constituent of ribosome	GO:0006412//translation	-
IP_peak_1071	cluster1	8568401	8568916	516	8568594	47.5	3.74573	Intron (SK1T00040357-RA/SK1G00040357, intron 1 of 5)	cluster1	8547329	8570627	23299	6	-	SK1G00040357	SK1T00040357-RA	2033	CYP94A1	XP_015624649.1 cytochrome P450 94B3 [Oryza sativa Japonica Group]	-	-	-	-	GO:0000276//mitochondrial proton-transporting ATP synthase complex, coupling factor F(o)	GO:0005506//iron ion binding;GO:0015078//hydrogen ion transmembrane transporter activity;GO:0016705//oxidoreductase activity, acting on paired donors, with incorporation or reduction of molecular oxygen;GO:0020037//heme binding;GO:0030298//receptor signaling protein tyrosine kinase activator activity;GO:0030971//receptor tyrosine kinase binding	GO:0015986//ATP synthesis coupled proton transport;GO:0055114//oxidation-reduction process	-
IP_peak_1072	cluster1	8604129	8604687	559	8604468	41.5	2.99331	Intron (SK1T00040358-RA/SK1G00040358, intron 2 of 3)	cluster1	8597449	8613698	16250	4	-	SK1G00040358	SK1T00040358-RA	9230	CYP94B1	XP_015647094.1 cytochrome P450 94B3 [Oryza sativa Japonica Group]	-	-	-	-	GO:0000276//mitochondrial proton-transporting ATP synthase complex, coupling factor F(o);GO:0009523//photosystem II;GO:0009538//photosystem I reaction center	GO:0003674//molecular_function;GO:0003677//DNA binding;GO:0005506//iron ion binding;GO:0015078//hydrogen ion transmembrane transporter activity;GO:0016705//oxidoreductase activity, acting on paired donors, with incorporation or reduction of molecular oxygen;GO:0020037//heme binding	GO:0008150//biological_process;GO:0015986//ATP synthesis coupled proton transport;GO:0055114//oxidation-reduction process	-
IP_peak_1073	cluster1	8611237	8611766	530	8611621	31	2.19589	Intron (SK1T00040358-RA/SK1G00040358, intron 1 of 3)	cluster1	8597449	8613698	16250	4	-	SK1G00040358	SK1T00040358-RA	2077	CYP94B1	XP_015647094.1 cytochrome P450 94B3 [Oryza sativa Japonica Group]	-	-	-	-	GO:0000276//mitochondrial proton-transporting ATP synthase complex, coupling factor F(o);GO:0009523//photosystem II;GO:0009538//photosystem I reaction center	GO:0003674//molecular_function;GO:0003677//DNA binding;GO:0005506//iron ion binding;GO:0015078//hydrogen ion transmembrane transporter activity;GO:0016705//oxidoreductase activity, acting on paired donors, with incorporation or reduction of molecular oxygen;GO:0020037//heme binding	GO:0008150//biological_process;GO:0015986//ATP synthesis coupled proton transport;GO:0055114//oxidation-reduction process	-
IP_peak_1074	cluster1	8615407	8615792	386	8615611	43	3.43785	Promoter (<=1kb)	cluster1	8614250	8614927	678	1	-	SK1G00040360	SK1T00040360-RA	-684	CYP94B3	XP_025881252.1 cytochrome P450 94B3-like [Oryza sativa Japonica Group]	-	-	-	-	-	GO:0005506//iron ion binding;GO:0016705//oxidoreductase activity, acting on paired donors, with incorporation or reduction of molecular oxygen;GO:0020037//heme binding	GO:0055114//oxidation-reduction process	-
IP_peak_1077	cluster1	8673003	8673835	833	8673684	46.5	3.27951	Downstream (1-2kb)	cluster1	8675512	8676417	906	1	-	SK1G00040368	SK1T00040368-RA	2733	EDL3	XP_015645582.1 EID1-like F-box protein 3 [Oryza sativa Japonica Group]	-	-	-	-	-	GO:0005515//protein binding	-	-
IP_peak_1078	cluster1	8676760	8677185	426	8676985	171.5	10.6811	Promoter (<=1kb)	cluster1	8675512	8676417	906	1	-	SK1G00040368	SK1T00040368-RA	-568	EDL3	XP_015645582.1 EID1-like F-box protein 3 [Oryza sativa Japonica Group]	-	-	-	-	-	GO:0005515//protein binding	-	-
IP_peak_1079	cluster1	8682466	8683353	888	8683199	35.5	2.26104	Intron (SK1T00040370-RA/SK1G00040370, intron 10 of 10)	cluster1	8682519	8687700	5182	11	-	SK1G00040370	SK1T00040370-RA	4501	ISPE	EAY76173.1 hypothetical protein OsI_04105 [Oryza sativa Indica Group]	Metabolism;Metabolism;Metabolism	Global and overview maps;Global and overview maps;Metabolism of terpenoids and polyketides	ko01100//Metabolic pathways;ko01110//Biosynthesis of secondary metabolites;ko00900//Terpenoid backbone biosynthesis	K00919;K00919;K00919	-	GO:0004163//diphosphomevalonate decarboxylase activity;GO:0004413//homoserine kinase activity;GO:0004496//mevalonate kinase activity;GO:0004765//shikimate kinase activity;GO:0005524//ATP binding;GO:0050515//4-(cytidine 5'-diphospho)-2-C-methyl-D-erythritol kinase activity	GO:0009088//threonine biosynthetic process;GO:0009423//chorismate biosynthetic process;GO:0016114//terpenoid biosynthetic process;GO:0016126//sterol biosynthetic process;GO:0019287//isopentenyl diphosphate biosynthetic process, mevalonate pathway	-
IP_peak_1080	cluster1	8685770	8686915	1146	8686543	34	2.14422	Exon (SK1T00040370-RA/SK1G00040370, exon 2 of 11)	cluster1	8682519	8687700	5182	11	-	SK1G00040370	SK1T00040370-RA	1157	ISPE	EAY76173.1 hypothetical protein OsI_04105 [Oryza sativa Indica Group]	Metabolism;Metabolism;Metabolism	Global and overview maps;Global and overview maps;Metabolism of terpenoids and polyketides	ko01100//Metabolic pathways;ko01110//Biosynthesis of secondary metabolites;ko00900//Terpenoid backbone biosynthesis	K00919;K00919;K00919	-	GO:0004163//diphosphomevalonate decarboxylase activity;GO:0004413//homoserine kinase activity;GO:0004496//mevalonate kinase activity;GO:0004765//shikimate kinase activity;GO:0005524//ATP binding;GO:0050515//4-(cytidine 5'-diphospho)-2-C-methyl-D-erythritol kinase activity	GO:0009088//threonine biosynthetic process;GO:0009423//chorismate biosynthetic process;GO:0016114//terpenoid biosynthetic process;GO:0016126//sterol biosynthetic process;GO:0019287//isopentenyl diphosphate biosynthetic process, mevalonate pathway	-
IP_peak_1081	cluster1	8711521	8711971	451	8711652	34	2.27969	Intron (SK1T00040373-RA/SK1G00040373, intron 1 of 10)	cluster1	8710536	8721052	10517	11	+	SK1G00040373	SK1T00040373-RA	1116	Os01g0801600	OEL28355.1 putative glycerol-3-phosphate dehydrogenase [NAD(+)] 2, cytosolic [Dichanthelium oligosanthes]	Metabolism;Metabolism	Global and overview maps;Lipid metabolism	ko01110//Biosynthesis of secondary metabolites;ko00564//Glycerophospholipid metabolism	K00006;K00006	-	GO:0004367//glycerol-3-phosphate dehydrogenase [NAD+] activity;GO:0004553//hydrolase activity, hydrolyzing O-glycosyl compounds;GO:0016616//oxidoreductase activity, acting on the CH-OH group of donors, NAD or NADP as acceptor;GO:0051287//NAD binding	GO:0005975//carbohydrate metabolic process;GO:0046168//glycerol-3-phosphate catabolic process;GO:0055114//oxidation-reduction process	-
IP_peak_1082	cluster1	8712329	8712846	518	8712513	41	2.68929	Intron (SK1T00040373-RA/SK1G00040373, intron 1 of 10)	cluster1	8710536	8721052	10517	11	+	SK1G00040373	SK1T00040373-RA	1977	Os01g0801600	OEL28355.1 putative glycerol-3-phosphate dehydrogenase [NAD(+)] 2, cytosolic [Dichanthelium oligosanthes]	Metabolism;Metabolism	Global and overview maps;Lipid metabolism	ko01110//Biosynthesis of secondary metabolites;ko00564//Glycerophospholipid metabolism	K00006;K00006	-	GO:0004367//glycerol-3-phosphate dehydrogenase [NAD+] activity;GO:0004553//hydrolase activity, hydrolyzing O-glycosyl compounds;GO:0016616//oxidoreductase activity, acting on the CH-OH group of donors, NAD or NADP as acceptor;GO:0051287//NAD binding	GO:0005975//carbohydrate metabolic process;GO:0046168//glycerol-3-phosphate catabolic process;GO:0055114//oxidation-reduction process	-
IP_peak_1083	cluster1	8716337	8717107	771	8716683	40.5	2.40301	Intron (SK1T00040373-RA/SK1G00040373, intron 6 of 10)	cluster1	8710536	8721052	10517	11	+	SK1G00040373	SK1T00040373-RA	6147	Os01g0801600	OEL28355.1 putative glycerol-3-phosphate dehydrogenase [NAD(+)] 2, cytosolic [Dichanthelium oligosanthes]	Metabolism;Metabolism	Global and overview maps;Lipid metabolism	ko01110//Biosynthesis of secondary metabolites;ko00564//Glycerophospholipid metabolism	K00006;K00006	-	GO:0004367//glycerol-3-phosphate dehydrogenase [NAD+] activity;GO:0004553//hydrolase activity, hydrolyzing O-glycosyl compounds;GO:0016616//oxidoreductase activity, acting on the CH-OH group of donors, NAD or NADP as acceptor;GO:0051287//NAD binding	GO:0005975//carbohydrate metabolic process;GO:0046168//glycerol-3-phosphate catabolic process;GO:0055114//oxidation-reduction process	-
IP_peak_1084	cluster1	8719231	8719956	726	8719357	41	2.85196	Promoter (1-2kb)	cluster1	8721319	8721435	117	1	+	SK1G00040374	SK1T00040374-RA	-1962	--	AER41606.1 legume+lectins+beta+domain+containing+protein [Oryza glaberrima]	-	-	-	-	-	-	-	-
IP_peak_1085	cluster1	8738987	8739762	776	8739606	39	2.52602	Intron (SK1T00040375-RA/SK1G00040375, intron 1 of 1)	cluster1	8738297	8740985	2689	2	+	SK1G00040375	SK1T00040375-RA	1309	--	EEC71655.1 hypothetical protein OsI_04098 [Oryza sativa Indica Group]	-	-	-	-	-	-	-	-
IP_peak_1086	cluster1	8742542	8744003	1462	8743379	42	2.87861	Exon (SK1T00040376-RA/SK1G00040376, exon 14 of 19)	cluster1	8741542	8751628	10087	19	-	SK1G00040376	SK1T00040376-RA	8249	ARP	XP_021313040.1 DNA-(apurinic or apyrimidinic site) lyase, chloroplastic [Sorghum bicolor]	Genetic Information Processing	Replication and repair	ko03410//Base excision repair	K01142	-	GO:0003677//DNA binding;GO:0008853//exodeoxyribonuclease III activity	GO:0006281//DNA repair;GO:0006353//DNA-templated transcription, termination	-
IP_peak_1087	cluster1	8746250	8746715	466	8746467	36	2.40804	Intron (SK1T00040376-RA/SK1G00040376, intron 12 of 18)	cluster1	8741542	8751628	10087	19	-	SK1G00040376	SK1T00040376-RA	5161	ARP	XP_021313040.1 DNA-(apurinic or apyrimidinic site) lyase, chloroplastic [Sorghum bicolor]	Genetic Information Processing	Replication and repair	ko03410//Base excision repair	K01142	-	GO:0003677//DNA binding;GO:0008853//exodeoxyribonuclease III activity	GO:0006281//DNA repair;GO:0006353//DNA-templated transcription, termination	-
IP_peak_1088	cluster1	8748173	8749320	1148	8748948	39.5	2.89614	Intron (SK1T00040376-RA/SK1G00040376, intron 7 of 18)	cluster1	8741542	8751628	10087	19	-	SK1G00040376	SK1T00040376-RA	2680	ARP	XP_021313040.1 DNA-(apurinic or apyrimidinic site) lyase, chloroplastic [Sorghum bicolor]	Genetic Information Processing	Replication and repair	ko03410//Base excision repair	K01142	-	GO:0003677//DNA binding;GO:0008853//exodeoxyribonuclease III activity	GO:0006281//DNA repair;GO:0006353//DNA-templated transcription, termination	-
IP_peak_1089	cluster1	8764180	8764876	697	8764541	40	3.18127	Intron (SK1T00040378-RA/SK1G00040378, intron 1 of 3)	cluster1	8762325	8765941	3617	4	-	SK1G00040378	SK1T00040378-RA	1400	--	ACA04812.1 endosperm transfer cell specific PR60 precursor [Oryza sativa Japonica Group]	-	-	-	-	-	-	-	-
IP_peak_1090	cluster1	8769815	8770418	604	8770193	171	9.28937	3' UTR	cluster1	8767586	8767978	393	1	-	SK1G00040379	SK1T00040379-RA	-2215	--	BAS74794.1 Os01g0800600 [Oryza sativa Japonica Group]	-	-	-	-	-	-	-	-
IP_peak_1091	cluster1	8775620	8776214	595	8775736	38	2.13889	Intron (SK1T00040380-RA/SK1G00040380, intron 2 of 12)	cluster1	8770016	8777340	7325	13	-	SK1G00040380	SK1T00040380-RA	1604	PAP27	EEC71650.1 hypothetical protein OsI_04091 [Oryza sativa Indica Group]	-	-	-	-	-	GO:0003993//acid phosphatase activity;GO:0016787//hydrolase activity;GO:0046872//metal ion binding	-	-
IP_peak_1094	cluster1	8814246	8815091	846	8814562	32	2.24653	Downstream (2-3kb)	cluster1	8817414	8820450	3037	5	-	SK1G00040388	SK1T00040388-RA	5888	tag	EAY76151.1 hypothetical protein OsI_04083 [Oryza sativa Indica Group]	Genetic Information Processing	Replication and repair	ko03410//Base excision repair	K01246	-	GO:0008725//DNA-3-methyladenine glycosylase activity	GO:0006281//DNA repair;GO:0006284//base-excision repair	-
IP_peak_1095	cluster1	8830570	8830969	400	8830769	43	2.81143	Downstream (2-3kb)	cluster1	8833006	8833419	414	1	+	SK1G00040389	SK1T00040389-RA	-2237	--	BAT01823.1 Os07g0523000, partial [Oryza sativa Japonica Group]	-	-	-	-	-	-	-	-
IP_peak_1097	cluster1	8851664	8853211	1548	8851892	34.5	2.36439	Intron (SK1T00040393-RA/SK1G00040393, intron 5 of 5)	cluster1	8851522	8853738	2217	6	-	SK1G00040393	SK1T00040393-RA	1846	CEST	B8AAV3.1 RecName: Full=Protein CHLOROPLAST ENHANCING STRESS TOLERANCE, chloroplastic; Short=OsCEST; Flags: Precursor [Oryza sativa Indica Group]	-	-	-	-	-	-	-	-
IP_peak_1098	cluster1	8867575	8868409	835	8868126	38	2.36579	Intron (SK1T00040395-RA/SK1G00040395, intron 10 of 10)	cluster1	8863117	8877939	14823	11	-	SK1G00040395	SK1T00040395-RA	9813	--	XP_015620496.1 uncharacterized protein LOC4327625 [Oryza sativa Japonica Group]	-	-	-	-	GO:0016020//membrane	-	-	-
IP_peak_1099	cluster1	8868976	8869263	288	8869094	35.5	2.29833	5' UTR	cluster1	8863117	8877939	14823	11	-	SK1G00040395	SK1T00040395-RA	8845	--	XP_015620496.1 uncharacterized protein LOC4327625 [Oryza sativa Japonica Group]	-	-	-	-	GO:0016020//membrane	-	-	-
IP_peak_1100	cluster1	8878328	8879067	740	8878865	38	2.82992	Promoter (<=1kb)	cluster1	8863117	8877939	14823	11	-	SK1G00040395	SK1T00040395-RA	-926	--	XP_015620496.1 uncharacterized protein LOC4327625 [Oryza sativa Japonica Group]	-	-	-	-	GO:0016020//membrane	-	-	-
IP_peak_1101	cluster1	8882147	8882681	535	8882543	50	3.09712	Promoter (<=1kb)	cluster1	8880033	8882114	2082	2	-	SK1G00040396	SK1T00040396-RA	-429	SDH6	EEC75305.1 hypothetical protein OsI_11670 [Oryza sativa Indica Group]	-	-	-	-	-	-	-	-
IP_peak_1103	cluster1	8915703	8916385	683	8915920	42	2.70072	Intron (SK1T00040399-RA/SK1G00040399, intron 1 of 8)	cluster1	8914793	8919482	4690	9	+	SK1G00040399	SK1T00040399-RA	1127	RING1A	EEC71638.1 hypothetical protein OsI_04070 [Oryza sativa Indica Group]	-	-	-	-	-	GO:0008270//zinc ion binding;GO:0046872//metal ion binding;GO:0061630//ubiquitin protein ligase activity	-	-
IP_peak_1104	cluster1	8917274	8917952	679	8917813	47.5	2.64937	Intron (SK1T00040399-RA/SK1G00040399, intron 4 of 8)	cluster1	8914793	8919482	4690	9	+	SK1G00040399	SK1T00040399-RA	3020	RING1A	EEC71638.1 hypothetical protein OsI_04070 [Oryza sativa Indica Group]	-	-	-	-	-	GO:0008270//zinc ion binding;GO:0046872//metal ion binding;GO:0061630//ubiquitin protein ligase activity	-	-
IP_peak_1105	cluster1	8918817	8919897	1081	8919461	40.5	2.47457	Exon (SK1T00040399-RA/SK1G00040399, exon 9 of 9)	cluster1	8914793	8919482	4690	9	+	SK1G00040399	SK1T00040399-RA	4668	RING1A	EEC71638.1 hypothetical protein OsI_04070 [Oryza sativa Indica Group]	-	-	-	-	-	GO:0008270//zinc ion binding;GO:0046872//metal ion binding;GO:0061630//ubiquitin protein ligase activity	-	-
IP_peak_1106	cluster1	8926908	8927319	412	8927024	37	2.16607	Downstream (<1kb)	cluster1	8925023	8926996	1974	6	+	SK1G00040400	SK1T00040400-RA	2001	--	EEC71635.1 hypothetical protein OsI_04067 [Oryza sativa Indica Group]	Metabolism;Metabolism	Global and overview maps;Lipid metabolism	ko01100//Metabolic pathways;ko00564//Glycerophospholipid metabolism	K01094;K01094	-	GO:0008962//phosphatidylglycerophosphatase activity;GO:0008967//phosphoglycolate phosphatase activity;GO:0016787//hydrolase activity	GO:0008152//metabolic process;GO:0009853//photorespiration;GO:0015671//oxygen transport	-
IP_peak_1107	cluster1	8928869	8929536	668	8929413	44.5	2.90941	Intron (SK1T00040401-RA/SK1G00040401, intron 2 of 3)	cluster1	8927390	8930083	2694	4	-	SK1G00040401	SK1T00040401-RA	670	hbdA	XP_015621276.1 uncharacterized protein LOC4325632 [Oryza sativa Japonica Group]	Metabolism;Metabolism;Metabolism;Metabolism	Global and overview maps;Global and overview maps;Amino acid metabolism;Carbohydrate metabolism	ko01100//Metabolic pathways;ko01200//Carbon metabolism;ko00360//Phenylalanine metabolism;ko00650//Butanoate metabolism	K00074;K00074;K00074;K00074	GO:0009320//phosphoribosylaminoimidazole carboxylase complex;GO:0010007//magnesium chelatase complex;GO:0016507//mitochondrial fatty acid beta-oxidation multienzyme complex	GO:0003857//3-hydroxyacyl-CoA dehydrogenase activity;GO:0004165//dodecenoyl-CoA delta-isomerase activity;GO:0004300//enoyl-CoA hydratase activity;GO:0004638//phosphoribosylaminoimidazole carboxylase activity;GO:0005488//binding;GO:0008692//3-hydroxybutyryl-CoA epimerase activity;GO:0016152//mercury (II) reductase activity;GO:0016491//oxidoreductase activity;GO:0016616//oxidoreductase activity, ac…	GO:0006631//fatty acid metabolic process;GO:0006635//fatty acid beta-oxidation;GO:0006813//potassium ion transport;GO:0009062//fatty acid catabolic process;GO:0009152//purine ribonucleotide biosynthetic process;GO:0009228//thiamine biosynthetic process;GO:0015995//chlorophyll biosynthetic process;GO:0019439//aromatic compound catabolic process;GO:0030494//bacteriochlorophyll biosynthetic process;…	-
IP_peak_1109	cluster1	8958095	8958856	762	8958622	42	3.58615	Downstream (2-3kb)	cluster1	8961218	8961463	246	1	-	SK1G00040406	SK1T00040406-RA	2841	--	BAD53018.1 unknown protein [Oryza sativa Japonica Group]	-	-	-	-	-	-	-	-
IP_peak_1110	cluster1	8965366	8965663	298	8965467	32.5	2.09223	Exon (SK1T00040408-RA/SK1G00040408, exon 37 of 39)	cluster1	8964387	8991380	26994	39	-	SK1G00040408	SK1T00040408-RA	25913	SBT3.5	EEC71630.1 hypothetical protein OsI_04057 [Oryza sativa Indica Group]	-	-	-	-	-	GO:0008233//peptidase activity;GO:0008236//serine-type peptidase activity	GO:0006508//proteolysis;GO:0009306//protein secretion	-
IP_peak_1111	cluster1	8969732	8970214	483	8969975	39.5	2.57212	Intron (SK1T00040408-RA/SK1G00040408, intron 29 of 38)	cluster1	8964387	8991380	26994	39	-	SK1G00040408	SK1T00040408-RA	21405	SBT3.5	EEC71630.1 hypothetical protein OsI_04057 [Oryza sativa Indica Group]	-	-	-	-	-	GO:0008233//peptidase activity;GO:0008236//serine-type peptidase activity	GO:0006508//proteolysis;GO:0009306//protein secretion	-
IP_peak_1112	cluster1	8970630	8971436	807	8971296	35.5	2.45999	Intron (SK1T00040408-RA/SK1G00040408, intron 29 of 38)	cluster1	8964387	8991380	26994	39	-	SK1G00040408	SK1T00040408-RA	20084	SBT3.5	EEC71630.1 hypothetical protein OsI_04057 [Oryza sativa Indica Group]	-	-	-	-	-	GO:0008233//peptidase activity;GO:0008236//serine-type peptidase activity	GO:0006508//proteolysis;GO:0009306//protein secretion	-
IP_peak_1113	cluster1	8973213	8973816	604	8973692	43.5	2.73906	Exon (SK1T00040408-RA/SK1G00040408, exon 26 of 39)	cluster1	8964387	8991380	26994	39	-	SK1G00040408	SK1T00040408-RA	17688	SBT3.5	EEC71630.1 hypothetical protein OsI_04057 [Oryza sativa Indica Group]	-	-	-	-	-	GO:0008233//peptidase activity;GO:0008236//serine-type peptidase activity	GO:0006508//proteolysis;GO:0009306//protein secretion	-
IP_peak_1114	cluster1	8984627	8985512	886	8985059	41	2.72152	Intron (SK1T00040408-RA/SK1G00040408, intron 11 of 38)	cluster1	8964387	8991380	26994	39	-	SK1G00040408	SK1T00040408-RA	6321	SBT3.5	EEC71630.1 hypothetical protein OsI_04057 [Oryza sativa Indica Group]	-	-	-	-	-	GO:0008233//peptidase activity;GO:0008236//serine-type peptidase activity	GO:0006508//proteolysis;GO:0009306//protein secretion	-
[truncated: 26,095 more rows]
