# Supplementary material for: Multiomics analysis of the molecular and single-cell responses of rice after deep-space flight on Chang'e-5
Source: Research Square preprint supplement (doi:10.21203/rs.3.rs-7211908/v1), 2025-08-22
Supplement: Supplementary file 5 [file ae5f945ee5b50e4abd79b2cf.xlsx]

## Sheet: Sheet1
Supplementary Data 3. Branch node 3 affects cell differentiation fate genes.
Branch	Geneid	Gene_Cluster	P_Value	FDR	Symbol	Description	KEGG_A_Class	KEGG_B_Class	Pathway	K_Id	GO Component	GO Function	GO Process
State 1,2,3,4 -vs- State 1,2,3,5	SK1G00039300	2	8.44536e-32	4.79994e-30	ABCD1	XP_015649181.1 ABC transporter D family member 1 [Oryza sativa Japonica Group]	-	-	-	-	GO:0005575//cellular_component;GO:0005887//integral component of plasma membrane;GO:0009380//excinuclease repair complex;GO:0009898//cytoplasmic side of plasma membrane;GO:0015627//type II protein secretion system complex;GO:0016021//integral component of membrane;GO:0043190//ATP-binding cassette (ABC) transporter complex;GO:0055051//ATP-binding cassette (ABC) transporter complex, integrated subs…	GO:0000166//nucleotide binding;GO:0003677//DNA binding;GO:0003697//single-stranded DNA binding;GO:0003924//GTPase activity;GO:0004527//exonuclease activity;GO:0005260//channel-conductance-controlling ATPase activity;GO:0005319//lipid transporter activity;GO:0005524//ATP binding;GO:0005525//GTP binding;GO:0008134//transcription factor binding;GO:0008565//protein transporter activity;GO:0009381//ex…	GO:0000910//cytokinesis;GO:0006260//DNA replication;GO:0006281//DNA repair;GO:0006289//nucleotide-excision repair;GO:0006298//mismatch repair;GO:0006310//DNA recombination;GO:0006355//regulation of transcription, DNA-templated;GO:0006810//transport;GO:0006817//phosphate ion transport;GO:0006824//cobalt ion transport;GO:0006855//drug transmembrane transport;GO:0006869//lipid transport;GO:0007059//…
State 1,2,3,4 -vs- State 1,2,3,5	SK1G00039322	2	1.26646e-91	3.06036e-89	Sb03g046810	CAH69262.1 TPA: class III peroxidase 20 precursor [Oryza sativa Japonica Group]	Metabolism;Metabolism;Metabolism	Global and overview maps;Global and overview maps;Biosynthesis of other secondary metabolites	ko01100//Metabolic pathways;ko01110//Biosynthesis of secondary metabolites;ko00940//Phenylpropanoid biosynthesis	K00430;K00430;K00430	-	GO:0004601//peroxidase activity;GO:0020037//heme binding	GO:0006979//response to oxidative stress;GO:0055114//oxidation-reduction process
State 1,2,3,4 -vs- State 1,2,3,5	SK1G00039323	5	2.01e-36	1.32221e-34	RPS10-1	XP_006645354.1 PREDICTED: 40S ribosomal protein S10-like [Oryza brachyantha]	Genetic Information Processing	Translation	ko03010//Ribosome	K02947	-	-	-
State 1,2,3,4 -vs- State 1,2,3,5	SK1G00039343	4	4.79248e-25	2.16588e-23	PSD2	XP_015622516.1 phosphatidylserine decarboxylase proenzyme 2 [Oryza sativa Japonica Group]	Metabolism;Metabolism;Metabolism	Global and overview maps;Global and overview maps;Lipid metabolism	ko01100//Metabolic pathways;ko01110//Biosynthesis of secondary metabolites;ko00564//Glycerophospholipid metabolism	K01613;K01613;K01613	-	GO:0004609//phosphatidylserine decarboxylase activity;GO:0005509//calcium ion binding	GO:0008654//phospholipid biosynthetic process
State 1,2,3,4 -vs- State 1,2,3,5	SK1G00039354	1	5.59851e-49	5.33164e-47	CFM9	BAD87108.1 protein kinase-like [Oryza sativa Japonica Group]	-	-	-	-	GO:0005737//cytoplasm	GO:0003723//RNA binding	GO:0008150//biological_process;GO:0048544//recognition of pollen
State 1,2,3,4 -vs- State 1,2,3,5	SK1G00039362	2	6.19307e-13	1.58723e-11	Os01g0957000	EEC72189.1 hypothetical protein OsI_05264 [Oryza sativa Indica Group]	Metabolism;Metabolism	Global and overview maps;Metabolism of cofactors and vitamins	ko01100//Metabolic pathways;ko00760//Nicotinate and nicotinamide metabolism	K00858;K00858	-	GO:0003951//NAD+ kinase activity;GO:0004623//phospholipase A2 activity;GO:0016301//kinase activity	GO:0006644//phospholipid metabolic process;GO:0006741//NADP biosynthetic process;GO:0050482//arachidonic acid secretion
State 1,2,3,4 -vs- State 1,2,3,5	SK1G00039375	5	5.8862e-18	1.99133e-16	CML23	EAY77275.1 hypothetical protein OsI_05249 [Oryza sativa Indica Group]	Organismal Systems	Environmental adaptation	ko04626//Plant-pathogen interaction	K13448	-	GO:0004553//hydrolase activity, hydrolyzing O-glycosyl compounds;GO:0005509//calcium ion binding;GO:0005515//protein binding;GO:0009055//electron carrier activity	GO:0000272//polysaccharide catabolic process;GO:0055114//oxidation-reduction process
State 1,2,3,4 -vs- State 1,2,3,5	SK1G00039379	4	1.49081e-10	3.22535e-09	LRP1	EEC72181.1 hypothetical protein OsI_05244 [Oryza sativa Indica Group]	-	-	-	-	-	-	-
State 1,2,3,4 -vs- State 1,2,3,5	SK1G00039380	4	4.02986e-09	7.76716e-08	--	EEE56020.1 hypothetical protein OsJ_04797 [Oryza sativa Japonica Group]	-	-	-	-	GO:0005680//anaphase-promoting complex	GO:0008270//zinc ion binding;GO:0046872//metal ion binding;GO:0061630//ubiquitin protein ligase activity;GO:0097602//cullin family protein binding	GO:0031145//anaphase-promoting complex-dependent proteasomal ubiquitin-dependent protein catabolic process
State 1,2,3,4 -vs- State 1,2,3,5	SK1G00039382	4	1.24071e-09	2.50411e-08	Os01g0954000	XP_015629376.1 probable NADPH:quinone oxidoreductase 2 [Oryza sativa Japonica Group]	-	-	-	-	-	GO:0003674//molecular_function;GO:0008752//FMN reductase activity;GO:0016491//oxidoreductase activity	GO:0044273//sulfur compound catabolic process;GO:0046685//response to arsenic-containing substance;GO:0055114//oxidation-reduction process
State 1,2,3,4 -vs- State 1,2,3,5	SK1G00039384	4	1.13249e-12	2.8551e-11	Os01g0953600	XP_015614534.1 probable NADPH:quinone oxidoreductase 1 [Oryza sativa Japonica Group]	-	-	-	-	-	GO:0003674//molecular_function;GO:0008752//FMN reductase activity;GO:0016491//oxidoreductase activity	GO:0044273//sulfur compound catabolic process;GO:0046685//response to arsenic-containing substance;GO:0055114//oxidation-reduction process
State 1,2,3,4 -vs- State 1,2,3,5	SK1G00039391	5	3.70287e-25	1.68201e-23	--	XP_015612726.1 uncharacterized protein LOC4325751 [Oryza sativa Japonica Group]	-	-	-	-	-	-	-
State 1,2,3,4 -vs- State 1,2,3,5	SK1G00039398	1	2.78597e-17	9.13788e-16	GER8	XP_015644058.1 germin-like protein 1-3 [Oryza sativa Japonica Group]	-	-	-	-	-	-	-
State 1,2,3,4 -vs- State 1,2,3,5	SK1G00039400	2	2.21644e-08	3.98444e-07	CYP94A1	EAY77243.1 hypothetical protein OsI_05217 [Oryza sativa Indica Group]	-	-	-	-	-	GO:0005506//iron ion binding;GO:0016705//oxidoreductase activity, acting on paired donors, with incorporation or reduction of molecular oxygen;GO:0020037//heme binding	GO:0055114//oxidation-reduction process
State 1,2,3,4 -vs- State 1,2,3,5	SK1G00039406	3	3.57215e-08	6.29726e-07	PLPBP	XP_015633399.1 pyridoxal phosphate homeostasis protein isoform X1 [Oryza sativa Japonica Group]	-	-	-	-	-	-	-
State 1,2,3,4 -vs- State 1,2,3,5	SK1G00039419	4	7.52694e-10	1.54283e-08	--	XP_025878262.1 cysteine-rich and transmembrane domain-containing protein WIH1-like [Oryza sativa Japonica Group]	-	-	-	-	-	-	-
State 1,2,3,4 -vs- State 1,2,3,5	SK1G00039428	2	5.30301e-08	9.16659e-07	BANGLUC	XP_015651097.1 glucan endo-1,3-beta-glucosidase GV [Oryza sativa Japonica Group]	-	-	-	-	-	GO:0004553//hydrolase activity, hydrolyzing O-glycosyl compounds	GO:0005975//carbohydrate metabolic process
State 1,2,3,4 -vs- State 1,2,3,5	SK1G00039448	4	3.08517e-51	3.0958e-49	VIT_06s0061g00120	EAY77172.1 hypothetical protein OsI_05142 [Oryza sativa Indica Group]	-	-	-	-	-	GO:0004553//hydrolase activity, hydrolyzing O-glycosyl compounds	GO:0005975//carbohydrate metabolic process
State 1,2,3,4 -vs- State 1,2,3,5	SK1G00039455	2	7.59755e-09	1.42643e-07	Os01g0939600	BAF07264.1 Os01g0939600, partial [Oryza sativa Japonica Group]	Metabolism;Metabolism	Global and overview maps;Lipid metabolism	ko01110//Biosynthesis of secondary metabolites;ko00564//Glycerophospholipid metabolism	K00006;K00006	-	GO:0004367//glycerol-3-phosphate dehydrogenase [NAD+] activity;GO:0016616//oxidoreductase activity, acting on the CH-OH group of donors, NAD or NADP as acceptor;GO:0051287//NAD binding	GO:0005975//carbohydrate metabolic process;GO:0046168//glycerol-3-phosphate catabolic process;GO:0055114//oxidation-reduction process
State 1,2,3,4 -vs- State 1,2,3,5	SK1G00039462	5	4.46588e-08	7.75731e-07	At3g12390	XP_015622168.1 nascent polypeptide-associated complex subunit alpha-like protein 1 [Oryza sativa Japonica Group]	-	-	-	-	-	-	-
State 1,2,3,4 -vs- State 1,2,3,5	SK1G00039472	2	7.52393e-122	2.59481e-119	CLP	OEL21144.1 Basic 7S globulin 2 [Dichanthelium oligosanthes]	-	-	-	-	-	-	-
State 1,2,3,4 -vs- State 1,2,3,5	SK1G00039494	1	4.69819e-30	2.49461e-28	LD	XP_015620702.1 homeobox protein LUMINIDEPENDENS [Oryza sativa Japonica Group]	-	-	-	-	GO:0009523//photosystem II;GO:0009654//photosystem II oxygen evolving complex;GO:0019898//extrinsic component of membrane	GO:0003677//DNA binding;GO:0005509//calcium ion binding;GO:0009036//Type II site-specific deoxyribonuclease activity	GO:0009307//DNA restriction-modification system;GO:0015979//photosynthesis
State 1,2,3,4 -vs- State 1,2,3,5	SK1G00039525	2	1.14221e-103	3.3532e-101	HAK5	XP_015622303.1 potassium transporter 5 [Oryza sativa Japonica Group]	-	-	-	-	GO:0016020//membrane	GO:0015079//potassium ion transmembrane transporter activity	GO:0006813//potassium ion transport;GO:0071805//potassium ion transmembrane transport
State 1,2,3,4 -vs- State 1,2,3,5	SK1G00039536	2	8.854e-16	2.6631e-14	Os01g0928700	XP_015613384.1 long chain base biosynthesis protein 2c [Oryza sativa Japonica Group]	Metabolism;Metabolism	Global and overview maps;Lipid metabolism	ko01100//Metabolic pathways;ko00600//Sphingolipid metabolism	K00654;K00654	-	GO:0003870//5-aminolevulinate synthase activity;GO:0008710//8-amino-7-oxononanoate synthase activity;GO:0008890//glycine C-acetyltransferase activity;GO:0016829//lyase activity;GO:0030170//pyridoxal phosphate binding	GO:0006520//cellular amino acid metabolic process;GO:0006567//threonine catabolic process;GO:0006783//heme biosynthetic process;GO:0009058//biosynthetic process;GO:0009102//biotin biosynthetic process
State 1,2,3,4 -vs- State 1,2,3,5	SK1G00039537	2	1.10754e-10	2.41511e-09	Os01g0928600	EAY77076.1 hypothetical protein OsI_05036 [Oryza sativa Indica Group]	Metabolism;Metabolism	Global and overview maps;Lipid metabolism	ko01100//Metabolic pathways;ko00600//Sphingolipid metabolism	K00654;K00654	-	GO:0003870//5-aminolevulinate synthase activity;GO:0004587//ornithine-oxo-acid transaminase activity;GO:0008710//8-amino-7-oxononanoate synthase activity;GO:0008890//glycine C-acetyltransferase activity;GO:0016829//lyase activity;GO:0030170//pyridoxal phosphate binding	GO:0006520//cellular amino acid metabolic process;GO:0006567//threonine catabolic process;GO:0006783//heme biosynthetic process;GO:0009058//biosynthetic process;GO:0009102//biotin biosynthetic process
State 1,2,3,4 -vs- State 1,2,3,5	SK1G00039550	2	1.76526e-14	4.99645e-13	pitC	XP_015636207.1 phosphatidylinositol transfer protein 3 [Oryza sativa Japonica Group]	-	-	-	-	-	-	-
State 1,2,3,4 -vs- State 1,2,3,5	SK1G00039551	5	9.7992e-12	2.32213e-10	Os01g0926700	PWZ18644.1 putative glucuronosyltransferase [Zea mays]	-	-	-	-	-	-	-
State 1,2,3,4 -vs- State 1,2,3,5	SK1G00039552	4	1.80615e-09	3.59429e-08	Os01g0926400	EAY77054.1 hypothetical protein OsI_05011 [Oryza sativa Indica Group]	-	-	-	-	-	-	-
State 1,2,3,4 -vs- State 1,2,3,5	SK1G00039553	4	2.18171e-44	1.8023e-42	tal	XP_015617463.1 uncharacterized protein LOC4327239 [Oryza sativa Japonica Group]	Metabolism;Metabolism;Metabolism;Metabolism;Metabolism	Global and overview maps;Global and overview maps;Global and overview maps;Global and overview maps;Carbohydrate metabolism	ko01100//Metabolic pathways;ko01110//Biosynthesis of secondary metabolites;ko01200//Carbon metabolism;ko01230//Biosynthesis of amino acids;ko00030//Pentose phosphate pathway	K00616;K00616;K00616;K00616;K00616	-	GO:0004801//sedoheptulose-7-phosphate:D-glyceraldehyde-3-phosphate glyceronetransferase activity;GO:0016832//aldehyde-lyase activity	GO:0005975//carbohydrate metabolic process;GO:0006098//pentose-phosphate shunt
State 1,2,3,4 -vs- State 1,2,3,5	SK1G00039570	5	3.06557e-10	6.48186e-09	SPBC1711.16	XP_015645860.1 uncharacterized WD repeat-containing protein C17D11.16 [Oryza sativa Japonica Group]	-	-	-	-	-	GO:0005515//protein binding	-
State 1,2,3,4 -vs- State 1,2,3,5	SK1G00039572	3	3.46708e-50	3.41157e-48	RPL27	EEC72062.1 hypothetical protein OsI_04988 [Oryza sativa Indica Group]	Genetic Information Processing	Translation	ko03010//Ribosome	K02899	GO:0000315//organellar large ribosomal subunit;GO:0005840//ribosome;GO:0022625//cytosolic large ribosomal subunit	GO:0003735//structural constituent of ribosome	GO:0006412//translation
State 1,2,3,4 -vs- State 1,2,3,5	SK1G00039592	5	6.82131e-19	2.41341e-17	TOM20	A2WYG9.2 RecName: Full=Probable mitochondrial import receptor subunit TOM20; AltName: Full=Translocase of outer membrane 20 kDa subunit [Oryza sativa Indica Group]	-	-	-	-	-	GO:0005515//protein binding	-
State 1,2,3,4 -vs- State 1,2,3,5	SK1G00039606	2	2.83615e-25	1.29161e-23	--	EEC72047.1 hypothetical protein OsI_04953 [Oryza sativa Indica Group]	-	-	-	-	-	-	-
State 1,2,3,4 -vs- State 1,2,3,5	SK1G00039611	1	1.96541e-15	5.82279e-14	SUMO1	P55857.1 RecName: Full=Small ubiquitin-related modifier 1; Short=OsSUMO1; AltName: Full=Ubiquitin-like protein SMT3 [Oryza sativa Japonica Group]	Genetic Information Processing	Translation	ko03013//RNA transport	K12160	-	GO:0005515//protein binding	-
State 1,2,3,4 -vs- State 1,2,3,5	SK1G00039624	5	2.66172e-79	4.95023e-77	RBG4	XP_015622053.1 glycine-rich RNA-binding protein 4, mitochondrial [Oryza sativa Japonica Group]	-	-	-	-	-	GO:0003676//nucleic acid binding	GO:0008380//RNA splicing
State 1,2,3,4 -vs- State 1,2,3,5	SK1G00039682	4	7.11412e-13	1.81153e-11	RGLG2	XP_015616475.1 E3 ubiquitin-protein ligase RGLG2 [Oryza sativa Japonica Group]	-	-	-	-	-	GO:0046872//metal ion binding	-
State 1,2,3,4 -vs- State 1,2,3,5	SK1G00039702	5	1.32036e-84	2.75894e-82	FBA3	XP_015613809.1 fructose-bisphosphate aldolase 3, cytoplasmic [Oryza sativa Japonica Group]	Metabolism;Metabolism;Metabolism;Metabolism;Metabolism;Metabolism;Metabolism;Metabolism	Global and overview maps;Global and overview maps;Global and overview maps;Global and overview maps;Carbohydrate metabolism;Energy metabolism;Carbohydrate metabolism;Carbohydrate metabolism	ko01100//Metabolic pathways;ko01110//Biosynthesis of secondary metabolites;ko01200//Carbon metabolism;ko01230//Biosynthesis of amino acids;ko00010//Glycolysis / Gluconeogenesis;ko00710//Carbon fixation in photosynthetic organisms;ko00051//Fructose and mannose metabolism;ko00030//Pentose phosphate pathway	K01623;K01623;K01623;K01623;K01623;K01623;K01623;K01623	-	GO:0004332//fructose-bisphosphate aldolase activity;GO:0050371//tyrosine phenol-lyase activity	GO:0006096//glycolytic process;GO:0006570//tyrosine metabolic process
State 1,2,3,4 -vs- State 1,2,3,5	SK1G00039703	1	1.26125e-64	1.74328e-62	AIRP2	XP_015621835.1 E3 ubiquitin-protein ligase AIRP2 [Oryza sativa Japonica Group]	-	-	-	-	GO:0000109//nucleotide-excision repair complex;GO:0005675//holo TFIIH complex	GO:0004693//cyclin-dependent protein serine/threonine kinase activity;GO:0008270//zinc ion binding;GO:0046872//metal ion binding	GO:0006289//nucleotide-excision repair;GO:0006352//DNA-templated transcription, initiation
State 1,2,3,4 -vs- State 1,2,3,5	SK1G00039762	5	3.72938e-23	1.56961e-21	RPL5B	XP_015614983.1 60S ribosomal protein L5-2 [Oryza sativa Japonica Group]	Genetic Information Processing	Translation	ko03010//Ribosome	K02932	GO:0005840//ribosome	GO:0003735//structural constituent of ribosome;GO:0008097//5S rRNA binding	GO:0006412//translation
State 1,2,3,4 -vs- State 1,2,3,5	SK1G00039770	1	1.83862e-18	6.32252e-17	At3g07570	OEL21176.1 Cytochrome b561 and DOMON domain-containing protein [Dichanthelium oligosanthes]	-	-	-	-	-	-	-
State 1,2,3,4 -vs- State 1,2,3,5	SK1G00000507	2	1.93758e-17	6.39654e-16	--	-	-	-	-	-	-	-	-
State 1,2,3,4 -vs- State 1,2,3,5	SK1G00039800	2	9.36985e-12	2.22484e-10	--	XP_015630051.1 uncharacterized protein LOC4324903 [Oryza sativa Japonica Group]	-	-	-	-	-	-	-
State 1,2,3,4 -vs- State 1,2,3,5	SK1G00039813	2	1.03225e-10	2.26624e-09	--	BAD82128.1 unknown protein [Oryza sativa Japonica Group]	-	-	-	-	-	-	-
State 1,2,3,4 -vs- State 1,2,3,5	SK1G00039853	5	2.94021e-09	5.75439e-08	OsI_04666	XP_015630103.1 stearoyl-[acyl-carrier-protein] 9-desaturase 1, chloroplastic [Oryza sativa Japonica Group]	Metabolism;Metabolism;Metabolism;Metabolism	Global and overview maps;Global and overview maps;Lipid metabolism;Lipid metabolism	ko01100//Metabolic pathways;ko01212//Fatty acid metabolism;ko00061//Fatty acid biosynthesis;ko01040//Biosynthesis of unsaturated fatty acids	K03921;K03921;K03921;K03921	-	GO:0016491//oxidoreductase activity;GO:0045300//acyl-[acyl-carrier-protein] desaturase activity;GO:0046872//metal ion binding	GO:0006631//fatty acid metabolic process;GO:0055114//oxidation-reduction process
State 1,2,3,4 -vs- State 1,2,3,5	SK1G00039898	4	3.23186e-18	1.10599e-16	MYB308	XP_015627699.1 myb-related protein 308 [Oryza sativa Japonica Group]	-	-	-	-	GO:0005634//nucleus	GO:0003676//nucleic acid binding;GO:0005524//ATP binding;GO:0016818//hydrolase activity, acting on acid anhydrides, in phosphorus-containing anhydrides	GO:0006338//chromatin remodeling
State 1,2,3,4 -vs- State 1,2,3,5	SK1G00039900	2	1.0562e-13	2.86264e-12	PSI1	EEC71888.1 hypothetical protein OsI_04625 [Oryza sativa Indica Group]	-	-	-	-	-	GO:0005524//ATP binding;GO:0008134//transcription factor binding	GO:0006355//regulation of transcription, DNA-templated;GO:0045927//positive regulation of growth
State 1,2,3,4 -vs- State 1,2,3,5	SK1G00000685	3	2.85402e-09	5.59186e-08	sbt3	XP_025881016.1 uncharacterized protein LOC4324925 [Oryza sativa Japonica Group]	-	-	-	-	-	GO:0008236//serine-type peptidase activity	GO:0006508//proteolysis;GO:0009306//protein secretion
State 1,2,3,4 -vs- State 1,2,3,5	SK1G00039947	2	1.41616e-13	3.79946e-12	HTR2	EOY31042.1 Histone superfamily protein [Theobroma cacao]	-	-	-	-	GO:0071821//FANCM-MHF complex	GO:0003677//DNA binding	-
State 1,2,3,4 -vs- State 1,2,3,5	SK1G00039948	4	2.96054e-36	1.9403e-34	ACT7	XP_015641450.1 actin-7 [Oryza sativa Japonica Group]	-	-	-	-	-	-	-
State 1,2,3,4 -vs- State 1,2,3,5	SK1G00039951	2	1.3502e-13	3.63072e-12	PUB23	XP_015619864.1 E3 ubiquitin-protein ligase PUB23 [Oryza sativa Japonica Group]	-	-	-	-	-	GO:0004842//ubiquitin-protein transferase activity;GO:0005515//protein binding;GO:0008270//zinc ion binding	GO:0016567//protein ubiquitination
State 1,2,3,4 -vs- State 1,2,3,5	SK1G00039958	2	5.92343e-36	3.8537e-34	--	ABY66166.1 DL119 protein [Oryza sativa Indica Group]	-	-	-	-	-	-	-
State 1,2,3,4 -vs- State 1,2,3,5	SK1G00039960	4	9.92049e-11	2.18067e-09	--	EAY76592.1 hypothetical protein OsI_04540 [Oryza sativa Indica Group]	-	-	-	-	-	-	-
State 1,2,3,4 -vs- State 1,2,3,5	SK1G00039982	4	8.74859e-15	2.52862e-13	At2g27500	KAF2953433.1 hypothetical protein DAI22_01g407900 [Oryza sativa Japonica Group]	-	-	-	-	-	GO:0004553//hydrolase activity, hydrolyzing O-glycosyl compounds	GO:0005975//carbohydrate metabolic process
State 1,2,3,4 -vs- State 1,2,3,5	SK1G00039984	3	4.50153e-29	2.31074e-27	FDX6	XP_015618660.1 ferredoxin, root R-B1 [Oryza sativa Japonica Group]	Metabolism	Energy metabolism	ko00195//Photosynthesis	K02639	-	GO:0009055//electron carrier activity;GO:0050136//NADH dehydrogenase (quinone) activity;GO:0051536//iron-sulfur cluster binding	GO:0006120//mitochondrial electron transport, NADH to ubiquinone;GO:0010124//phenylacetate catabolic process
State 1,2,3,4 -vs- State 1,2,3,5	SK1G00039985	4	1.32285e-123	4.6525e-121	CHIT3	PHT74588.1 Acidic endochitinase [Capsicum annuum]	Metabolism;Metabolism	Global and overview maps;Carbohydrate metabolism	ko01100//Metabolic pathways;ko00520//Amino sugar and nucleotide sugar metabolism	K01183;K01183	-	-	GO:0005975//carbohydrate metabolic process
State 1,2,3,4 -vs- State 1,2,3,5	SK1G00039986	5	2.05758e-08	3.712e-07	RPL10A	BAB91757.1 putative 60S ribosomal protein L10A [Oryza sativa Japonica Group]	Genetic Information Processing	Translation	ko03010//Ribosome	K02865	GO:0000311//plastid large ribosomal subunit;GO:0022625//cytosolic large ribosomal subunit	GO:0003735//structural constituent of ribosome;GO:0008982//protein-N(PI)-phosphohistidine-sugar phosphotransferase activity	GO:0006412//translation;GO:0009401//phosphoenolpyruvate-dependent sugar phosphotransferase system
State 1,2,3,4 -vs- State 1,2,3,5	SK1G00039999	4	2.71088e-17	8.89982e-16	CYP94C1	EAY76557.1 hypothetical protein OsI_04502 [Oryza sativa Indica Group]	-	-	-	-	-	GO:0005506//iron ion binding;GO:0016705//oxidoreductase activity, acting on paired donors, with incorporation or reduction of molecular oxygen;GO:0020037//heme binding	GO:0055114//oxidation-reduction process
State 1,2,3,4 -vs- State 1,2,3,5	SK1G00040003	1	2.45923e-08	4.39642e-07	Os01g0857700	EAY76553.1 hypothetical protein OsI_04498 [Oryza sativa Indica Group]	Genetic Information Processing	Transcription	ko03040//Spliceosome	K12873	GO:0005634//nucleus	-	-
State 1,2,3,4 -vs- State 1,2,3,5	SK1G00040038	4	2.15517e-08	3.87822e-07	--	XP_015616097.1 uncharacterized protein LOC4324817 [Oryza sativa Japonica Group]	-	-	-	-	-	GO:0019904//protein domain specific binding	GO:0042981//regulation of apoptotic process
State 1,2,3,4 -vs- State 1,2,3,5	SK1G00040064	5	3.93147e-16	1.20184e-14	RAB11C	XP_015624957.1 ras-related protein Rab2BV [Oryza sativa Japonica Group]	-	-	-	-	GO:0005737//cytoplasm	GO:0003924//GTPase activity;GO:0005524//ATP binding;GO:0005525//GTP binding;GO:0017111//nucleoside-triphosphatase activity;GO:0043022//ribosome binding	GO:0006400//tRNA modification;GO:0006576//cellular biogenic amine metabolic process;GO:0008150//biological_process;GO:0042254//ribosome biogenesis
State 1,2,3,4 -vs- State 1,2,3,5	SK1G00040069	4	3.44172e-77	6.05232e-75	AKR4C10	ACS92968.1 aldo-keto reductase [Oryza sativa Indica Group]	Metabolism;Metabolism;Metabolism;Metabolism;Metabolism	Global and overview maps;Global and overview maps;Carbohydrate metabolism;Lipid metabolism;Carbohydrate metabolism	ko01100//Metabolic pathways;ko01110//Biosynthesis of secondary metabolites;ko00010//Glycolysis / Gluconeogenesis;ko00561//Glycerolipid metabolism;ko00040//Pentose and glucuronate interconversions	K00002;K00002;K00002;K00002;K00002	-	GO:0047834//D-threo-aldose 1-dehydrogenase activity	-
State 1,2,3,4 -vs- State 1,2,3,5	SK1G00040103	4	1.39543e-18	4.85488e-17	ERG1	XP_015616516.1 elicitor-responsive protein 1 [Oryza sativa Japonica Group]	-	-	-	-	-	-	-
State 1,2,3,4 -vs- State 1,2,3,5	SK1G00040114	5	5.70941e-25	2.56396e-23	HSP70-4	XP_015618966.1 probable mediator of RNA polymerase II transcription subunit 37c [Oryza sativa Japonica Group]	Genetic Information Processing;Genetic Information Processing;Cellular Processes	Folding, sorting and degradation;Transcription;Transport and catabolism	ko04141//Protein processing in endoplasmic reticulum;ko03040//Spliceosome;ko04144//Endocytosis	K03283;K03283;K03283	-	GO:0004856//xylulokinase activity;GO:0005515//protein binding;GO:0005524//ATP binding;GO:0016773//phosphotransferase activity, alcohol group as acceptor;GO:0016787//hydrolase activity;GO:0016887//ATPase activity;GO:0051082//unfolded protein binding	GO:0005975//carbohydrate metabolic process;GO:0005997//xylulose metabolic process;GO:0006457//protein folding;GO:0006950//response to stress;GO:0008360//regulation of cell shape;GO:0042732//D-xylose metabolic process;GO:0043093//FtsZ-dependent cytokinesis
State 1,2,3,4 -vs- State 1,2,3,5	SK1G00040116	3	9.21184e-28	4.55108e-26	UBC7	XP_015618097.1 ubiquitin-conjugating enzyme E2 7 [Oryza sativa Japonica Group]	Genetic Information Processing;Genetic Information Processing	Folding, sorting and degradation;Folding, sorting and degradation	ko04141//Protein processing in endoplasmic reticulum;ko04120//Ubiquitin mediated proteolysis	K10575;K10575	-	GO:0005515//protein binding	-
State 1,2,3,4 -vs- State 1,2,3,5	SK1G00040121	5	2.9104e-15	8.56532e-14	--	EAY76434.1 hypothetical protein OsI_04367 [Oryza sativa Indica Group]	-	-	-	-	-	GO:0046872//metal ion binding	GO:0006351//transcription, DNA-templated
State 1,2,3,4 -vs- State 1,2,3,5	SK1G00040124	2	1.59373e-08	2.90172e-07	ZAT5	EAY76430.1 hypothetical protein OsI_04363 [Oryza sativa Indica Group]	-	-	-	-	-	-	GO:0006351//transcription, DNA-templated
State 1,2,3,4 -vs- State 1,2,3,5	SK1G00040132	4	4.9004e-10	1.02095e-08	--	XP_015629123.1 uncharacterized protein LOC4327369 isoform X1 [Oryza sativa Japonica Group]	-	-	-	-	-	-	-
State 1,2,3,4 -vs- State 1,2,3,5	SK1G00040133	4	5.08031e-11	1.14652e-09	RIN1	XP_015640454.1 ruvB-like protein 1 [Oryza sativa Japonica Group]	-	-	-	-	GO:0009360//DNA polymerase III complex;GO:0009379//Holliday junction helicase complex	GO:0003678//DNA helicase activity;GO:0003887//DNA-directed DNA polymerase activity;GO:0004222//metalloendopeptidase activity;GO:0004252//serine-type endopeptidase activity;GO:0005198//structural molecule activity;GO:0005524//ATP binding;GO:0009378//four-way junction helicase activity;GO:0016887//ATPase activity	GO:0006260//DNA replication;GO:0006281//DNA repair;GO:0006310//DNA recombination;GO:0006508//proteolysis;GO:0009306//protein secretion;GO:0031412//gas vesicle organization;GO:0051301//cell division
State 1,2,3,4 -vs- State 1,2,3,5	SK1G00040145	2	1.69826e-18	5.85117e-17	At1g07660	XP_016507811.1 PREDICTED: uncharacterized protein LOC107825453 [Nicotiana tabacum]	-	-	-	-	GO:0071821//FANCM-MHF complex	GO:0003677//DNA binding	GO:0006352//DNA-templated transcription, initiation
State 1,2,3,4 -vs- State 1,2,3,5	SK1G00040156	5	6.67321e-85	1.41099e-82	RPS23	EAZ14059.1 hypothetical protein OsJ_03983 [Oryza sativa Japonica Group]	Genetic Information Processing	Translation	ko03010//Ribosome	K02973	GO:0000314//organellar small ribosomal subunit;GO:0005634//nucleus;GO:0005840//ribosome;GO:0022627//cytosolic small ribosomal subunit	GO:0003677//DNA binding;GO:0003735//structural constituent of ribosome;GO:0004879//RNA polymerase II transcription factor activity, ligand-activated sequence-specific DNA binding;GO:0005496//steroid binding	GO:0006355//regulation of transcription, DNA-templated;GO:0006412//translation;GO:0030521//androgen receptor signaling pathway
State 1,2,3,4 -vs- State 1,2,3,5	SK1G00040164	5	3.79615e-08	6.6591e-07	IQD1	XP_015621415.1 protein IQ-DOMAIN 1 [Oryza sativa Japonica Group]	-	-	-	-	-	GO:0005515//protein binding	-
State 1,2,3,4 -vs- State 1,2,3,5	SK1G00040165	5	2.62978e-12	6.47368e-11	Os01g0833700	XP_025878070.1 coatomer subunit delta-3 isoform X1 [Oryza sativa Japonica Group]	-	-	-	-	-	GO:0003677//DNA binding	-
State 1,2,3,4 -vs- State 1,2,3,5	SK1G00040172	2	2.67323e-75	4.52182e-73	At5g05600	XP_015624858.1 probable 2-oxoglutarate-dependent dioxygenase At5g05600 [Oryza sativa Japonica Group]	-	-	-	-	-	GO:0016491//oxidoreductase activity	GO:0055114//oxidation-reduction process
State 1,2,3,4 -vs- State 1,2,3,5	SK1G00040179	4	2.3043e-08	4.12983e-07	AMT2-3	XP_015621584.1 ammonium transporter 2 member 3 [Oryza sativa Japonica Group]	-	-	-	-	GO:0016020//membrane	GO:0008519//ammonium transmembrane transporter activity	GO:0015696//ammonium transport
State 1,2,3,4 -vs- State 1,2,3,5	SK1G00040201	1	5.02657e-11	1.13512e-09	CCR1	BAD73619.1 putative cinnamoyl-CoA reductase [Oryza sativa Japonica Group]	-	-	-	-	-	GO:0003824//catalytic activity;GO:0003854//3-beta-hydroxy-delta5-steroid dehydrogenase activity;GO:0003978//UDP-glucose 4-epimerase activity;GO:0008446//GDP-mannose 4,6-dehydratase activity;GO:0008460//dTDP-glucose 4,6-dehydratase activity;GO:0008667//2,3-dihydro-2,3-dihydroxybenzoate dehydrogenase activity;GO:0008712//ADP-glyceromanno-heptose 6-epimerase activity;GO:0016616//oxidoreductase activ…	GO:0000271//polysaccharide biosynthetic process;GO:0005975//carbohydrate metabolic process;GO:0006012//galactose metabolic process;GO:0006694//steroid biosynthetic process;GO:0008152//metabolic process;GO:0009243//O antigen biosynthetic process;GO:0009244//lipopolysaccharide core region biosynthetic process;GO:0019305//dTDP-rhamnose biosynthetic process;GO:0055114//oxidation-reduction process
State 1,2,3,4 -vs- State 1,2,3,5	SK1G00040232	5	4.03787e-10	8.47214e-09	RPS26	KAF2931274.1 hypothetical protein DAI22_05g206100 [Oryza sativa Japonica Group]	Genetic Information Processing	Translation	ko03010//Ribosome	K02976	GO:0005840//ribosome	GO:0003735//structural constituent of ribosome	GO:0006412//translation
State 1,2,3,4 -vs- State 1,2,3,5	SK1G00040234	1	3.15217e-30	1.68378e-28	EXPA2	XP_015625064.1 expansin-A2 [Oryza sativa Japonica Group]	-	-	-	-	-	-	-
State 1,2,3,4 -vs- State 1,2,3,5	SK1G00040236	1	4.10907e-42	3.15254e-40	LTP10	XP_015629722.1 non-specific lipid-transfer protein 1 [Oryza sativa Japonica Group]	-	-	-	-	-	-	-
State 1,2,3,4 -vs- State 1,2,3,5	SK1G00040256	4	2.64359e-08	4.7165e-07	PCMP-H52	EAY76294.1 hypothetical protein OsI_04228 [Oryza sativa Indica Group]	-	-	-	-	-	GO:0008270//zinc ion binding;GO:0042802//identical protein binding;GO:0046872//metal ion binding	-
State 1,2,3,4 -vs- State 1,2,3,5	SK1G00040291	5	2.01089e-62	2.68537e-60	VAR3	EEC71698.1 hypothetical protein OsI_04199 [Oryza sativa Indica Group]	-	-	-	-	-	-	-
State 1,2,3,4 -vs- State 1,2,3,5	SK1G00040294	2	2.87641e-13	7.55181e-12	CBR1	XP_015634676.1 NADH--cytochrome b5 reductase 1 [Oryza sativa Japonica Group]	Metabolism	Carbohydrate metabolism	ko00520//Amino sugar and nucleotide sugar metabolism	K00326	-	GO:0004846//urate oxidase activity;GO:0009055//electron carrier activity;GO:0016002//sulfite reductase activity;GO:0016491//oxidoreductase activity;GO:0016655//oxidoreductase activity, acting on NAD(P)H, quinone or similar compound as acceptor	GO:0006790//sulfur compound metabolic process;GO:0006814//sodium ion transport;GO:0010124//phenylacetate catabolic process;GO:0019628//urate catabolic process;GO:0055114//oxidation-reduction process
State 1,2,3,4 -vs- State 1,2,3,5	SK1G00040306	3	4.44854e-41	3.34082e-39	Os01g0813400	XP_015618373.1 ADP-ribosylation factor 1 [Oryza sativa Japonica Group]	Cellular Processes	Transport and catabolism	ko04144//Endocytosis	K07937	GO:0048501//signal recognition particle, plasma membrane targeting	GO:0003873//6-phosphofructo-2-kinase activity;GO:0003924//GTPase activity;GO:0005048//signal sequence binding;GO:0005524//ATP binding;GO:0005525//GTP binding;GO:0019001//guanyl nucleotide binding;GO:0031683//G-protein beta/gamma-subunit complex binding	GO:0006000//fructose metabolic process;GO:0007186//G-protein coupled receptor signaling pathway;GO:0009306//protein secretion;GO:0042254//ribosome biogenesis
State 1,2,3,4 -vs- State 1,2,3,5	SK1G00040309	4	7.70585e-11	1.70973e-09	RER3	EEC71687.1 hypothetical protein OsI_04178 [Oryza sativa Indica Group]	-	-	-	-	-	-	-
State 1,2,3,4 -vs- State 1,2,3,5	SK1G00040314	1	2.5326e-10	5.39994e-09	NHL13	EAY76236.1 hypothetical protein OsI_04172 [Oryza sativa Indica Group]	-	-	-	-	-	-	-
State 1,2,3,4 -vs- State 1,2,3,5	SK1G00040355	3	3.15221e-41	2.3824e-39	RPL34	XP_015614884.1 50S ribosomal protein L34, chloroplastic [Oryza sativa Japonica Group]	Genetic Information Processing	Translation	ko03010//Ribosome	K02914	GO:0000315//organellar large ribosomal subunit;GO:0005840//ribosome;GO:0022625//cytosolic large ribosomal subunit	GO:0003735//structural constituent of ribosome	GO:0006412//translation
State 1,2,3,4 -vs- State 1,2,3,5	SK1G00040364	2	2.84102e-10	6.02501e-09	Os01g0803200	XP_015621143.1 cysteine proteinase inhibitor 1 [Oryza sativa Japonica Group]	-	-	-	-	-	GO:0004869//cysteine-type endopeptidase inhibitor activity	-
State 1,2,3,4 -vs- State 1,2,3,5	SK1G00040388	2	2.62114e-117	8.70169e-115	tag	EAY76151.1 hypothetical protein OsI_04083 [Oryza sativa Indica Group]	Genetic Information Processing	Replication and repair	ko03410//Base excision repair	K01246	-	GO:0008725//DNA-3-methyladenine glycosylase activity	GO:0006281//DNA repair;GO:0006284//base-excision repair
State 1,2,3,4 -vs- State 1,2,3,5	SK1G00040398	4	8.27862e-14	2.25689e-12	ERF4	AAV98701.1 BTH-induced ERF transcriptional factor 2 [Oryza sativa Indica Group]	-	-	-	-	-	GO:0000772//mating pheromone activity;GO:0003700//transcription factor activity, sequence-specific DNA binding	GO:0006355//regulation of transcription, DNA-templated
State 1,2,3,4 -vs- State 1,2,3,5	SK1G00040408	2	2.66324e-101	7.62932e-99	SBT3.5	EEC71630.1 hypothetical protein OsI_04057 [Oryza sativa Indica Group]	-	-	-	-	-	GO:0008233//peptidase activity;GO:0008236//serine-type peptidase activity	GO:0006508//proteolysis;GO:0009306//protein secretion
State 1,2,3,4 -vs- State 1,2,3,5	SK1G00040410	3	4.66357e-19	1.66995e-17	GOS2	XP_015621165.1 protein translation factor SUI1 homolog isoform X2 [Oryza sativa Japonica Group]	Genetic Information Processing	Translation	ko03013//RNA transport	K03113	GO:0005840//ribosome	GO:0003743//translation initiation factor activity	GO:0006413//translational initiation
State 1,2,3,4 -vs- State 1,2,3,5	SK1G00040414	5	2.87404e-08	5.10458e-07	--	XP_015633594.1 uncharacterized protein LOC4324133 [Oryza sativa Japonica Group]	-	-	-	-	-	-	-
State 1,2,3,4 -vs- State 1,2,3,5	SK1G00040416	5	2.36807e-13	6.26347e-12	--	EAY76123.1 hypothetical protein OsI_04052 [Oryza sativa Indica Group]	-	-	-	-	-	GO:0005524//ATP binding	GO:0019069//viral capsid assembly
State 1,2,3,4 -vs- State 1,2,3,5	SK1G00040430	2	1.12759e-56	1.33961e-54	PME2.1	EAY76103.1 hypothetical protein OsI_04029 [Oryza sativa Indica Group]	Metabolism;Metabolism	Global and overview maps;Carbohydrate metabolism	ko01100//Metabolic pathways;ko00040//Pentose and glucuronate interconversions	K01051;K01051	-	GO:0004857//enzyme inhibitor activity;GO:0030599//pectinesterase activity	GO:0042545//cell wall modification
State 1,2,3,4 -vs- State 1,2,3,5	SK1G00040436	4	1.04179e-10	2.28436e-09	PER56	EAY76097.1 hypothetical protein OsI_04022 [Oryza sativa Indica Group]	Metabolism;Metabolism;Metabolism	Global and overview maps;Global and overview maps;Biosynthesis of other secondary metabolites	ko01100//Metabolic pathways;ko01110//Biosynthesis of secondary metabolites;ko00940//Phenylpropanoid biosynthesis	K00430;K00430;K00430	-	GO:0004601//peroxidase activity;GO:0020037//heme binding	GO:0006979//response to oxidative stress;GO:0055114//oxidation-reduction process
State 1,2,3,4 -vs- State 1,2,3,5	SK1G00040452	4	1.64575e-53	1.77152e-51	FQR1	EAY76084.1 hypothetical protein OsI_04011 [Oryza sativa Indica Group]	Metabolism;Metabolism;Metabolism	Global and overview maps;Global and overview maps;Metabolism of cofactors and vitamins	ko01100//Metabolic pathways;ko01110//Biosynthesis of secondary metabolites;ko00130//Ubiquinone and other terpenoid-quinone biosynthesis	K03809;K03809;K03809	-	GO:0003955//NAD(P)H dehydrogenase (quinone) activity;GO:0009055//electron carrier activity;GO:0010181//FMN binding;GO:0016491//oxidoreductase activity	GO:0055114//oxidation-reduction process
State 1,2,3,4 -vs- State 1,2,3,5	SK1G00040455	4	2.78353e-21	1.09015e-19	SD18	EAY76080.1 hypothetical protein OsI_04007 [Oryza sativa Indica Group]	-	-	-	-	-	GO:0004672//protein kinase activity;GO:0004674//protein serine/threonine kinase activity;GO:0005524//ATP binding	GO:0006468//protein phosphorylation;GO:0048544//recognition of pollen
State 1,2,3,4 -vs- State 1,2,3,5	SK1G00040457	1	5.20298e-25	2.34544e-23	PBP1	EAY76075.1 hypothetical protein OsI_04003 [Oryza sativa Indica Group]	-	-	-	-	-	GO:0005509//calcium ion binding;GO:0005515//protein binding	-
State 1,2,3,4 -vs- State 1,2,3,5	SK1G00040459	2	5.08338e-68	7.40048e-66	PHOS34	XP_015622057.1 universal stress protein PHOS32 [Oryza sativa Japonica Group]	-	-	-	-	-	-	-
State 1,2,3,4 -vs- State 1,2,3,5	SK1G00040461	1	5.99233e-22	2.39707e-20	DGK5	EEE55501.1 hypothetical protein OsJ_03694 [Oryza sativa Japonica Group]	Metabolism;Metabolism;Metabolism;Metabolism;Environmental Information Processing	Global and overview maps;Global and overview maps;Lipid metabolism;Lipid metabolism;Signal transduction	ko01100//Metabolic pathways;ko01110//Biosynthesis of secondary metabolites;ko00564//Glycerophospholipid metabolism;ko00561//Glycerolipid metabolism;ko04070//Phosphatidylinositol signaling system	K00901;K00901;K00901;K00901;K00901	GO:0005575//cellular_component	GO:0001727//lipid kinase activity;GO:0003951//NAD+ kinase activity;GO:0004143//diacylglycerol kinase activity;GO:0016301//kinase activity	GO:0006741//NADP biosynthetic process;GO:0007205//protein kinase C-activating G-protein coupled receptor signaling pathway;GO:0008150//biological_process
State 1,2,3,4 -vs- State 1,2,3,5	SK1G00040487	4	5.11387e-11	1.15337e-09	--	EEC71582.1 hypothetical protein OsI_03955 [Oryza sativa Indica Group]	-	-	-	-	-	-	-
State 1,2,3,4 -vs- State 1,2,3,5	SK1G00040513	3	7.54342e-41	5.62936e-39	PSBW	XP_015619359.1 photosystem II reaction center W protein, chloroplastic [Oryza sativa Japonica Group]	Metabolism	Energy metabolism	ko00195//Photosynthesis	K02721	GO:0009507//chloroplast;GO:0009523//photosystem II	-	GO:0015979//photosynthesis
State 1,2,3,4 -vs- State 1,2,3,5	SK1G00040557	1	2.69351e-10	5.72585e-09	CRWN4	EAY75957.1 hypothetical protein OsI_03874 [Oryza sativa Indica Group]	-	-	-	-	-	-	-
State 1,2,3,4 -vs- State 1,2,3,5	SK1G00040578	2	2.19163e-09	4.33469e-08	CM1	EAY75932.1 hypothetical protein OsI_03851 [Oryza sativa Indica Group]	Metabolism;Metabolism;Metabolism;Metabolism	Global and overview maps;Global and overview maps;Global and overview maps;Amino acid metabolism	ko01100//Metabolic pathways;ko01110//Biosynthesis of secondary metabolites;ko01230//Biosynthesis of amino acids;ko00400//Phenylalanine, tyrosine and tryptophan biosynthesis	K01850;K01850;K01850;K01850	-	GO:0004106//chorismate mutase activity	GO:0046417//chorismate metabolic process
State 1,2,3,4 -vs- State 1,2,3,5	SK1G00040587	5	4.65564e-10	9.71666e-09	C9orf85	XP_015627675.1 uncharacterized protein C9orf85 homolog [Oryza sativa Japonica Group]	-	-	-	-	-	-	-
State 1,2,3,4 -vs- State 1,2,3,5	SK1G00040603	4	2.2442e-12	5.55143e-11	Os01g0760600	XP_015621160.1 aspartate aminotransferase, cytoplasmic [Oryza sativa Japonica Group]	Metabolism;Metabolism;Metabolism;Metabolism;Metabolism;Metabolism;Metabolism;Metabolism;Metabolism;Metabolism;Metabolism;Metabolism;Metabolism;Metabolism;Metabolism	Global and overview maps;Global and overview maps;Global and overview maps;Global and overview maps;Amino acid metabolism;Energy metabolism;Amino acid metabolism;Amino acid metabolism;Global and overview maps;Amino acid metabolism;Amino acid metabolism;Amino acid metabolism;Amino acid metabolism;Biosynthesis of other secondary metabolites;Biosynthesis of other secondary metabolites	ko01100//Metabolic pathways;ko01110//Biosynthesis of secondary metabolites;ko01200//Carbon metabolism;ko01230//Biosynthesis of amino acids;ko00270//Cysteine and methionine metabolism;ko00710//Carbon fixation in photosynthetic organisms;ko00330//Arginine and proline metabolism;ko00250//Alanine, aspartate and glutamate metabolism;ko01210//2-Oxocarboxylic acid metabolism;ko00400//Phenylalanine, tyro…	K14454;K14454;K14454;K14454;K14454;K14454;K14454;K14454;K14454;K14454;K14454;K14454;K14454;K14454;K14454	GO:0005737//cytoplasm	GO:0004400//histidinol-phosphate transaminase activity;GO:0030170//pyridoxal phosphate binding;GO:0048472//threonine-phosphate decarboxylase activity	GO:0000105//histidine biosynthetic process;GO:0009058//biosynthetic process;GO:0009236//cobalamin biosynthetic process
State 1,2,3,4 -vs- State 1,2,3,5	SK1G00040630	4	1.50803e-69	2.26984e-67	GA2OX3	EAY75874.1 hypothetical protein OsI_03793 [Oryza sativa Indica Group]	Metabolism;Metabolism	Global and overview maps;Metabolism of terpenoids and polyketides	ko01110//Biosynthesis of secondary metabolites;ko00904//Diterpenoid biosynthesis	K04125;K04125	-	GO:0016491//oxidoreductase activity	GO:0055114//oxidation-reduction process
State 1,2,3,4 -vs- State 1,2,3,5	SK1G00040645	2	2.37711e-41	1.80427e-39	--	XP_015642446.1 uncharacterized protein LOC4325135 [Oryza sativa Japonica Group]	-	-	-	-	-	-	-
State 1,2,3,4 -vs- State 1,2,3,5	SK1G00040647	2	5.82532e-12	1.40385e-10	--	EEC71500.1 hypothetical protein OsI_03777 [Oryza sativa Indica Group]	-	-	-	-	-	GO:0004674//protein serine/threonine kinase activity;GO:0005524//ATP binding	GO:0007059//chromosome segregation;GO:0030261//chromosome condensation
State 1,2,3,4 -vs- State 1,2,3,5	SK1G00040665	4	5.237e-43	4.14318e-41	RPL18A	XP_006644713.1 PREDICTED: 60S ribosomal protein L18a [Oryza brachyantha]	Genetic Information Processing	Translation	ko03010//Ribosome	K02882	GO:0005840//ribosome	GO:0003735//structural constituent of ribosome	GO:0006412//translation
State 1,2,3,4 -vs- State 1,2,3,5	SK1G00040686	3	1.49595e-15	4.4468e-14	RPL13	XP_015623039.1 50S ribosomal protein L13, chloroplastic [Oryza sativa Japonica Group]	Genetic Information Processing	Translation	ko03010//Ribosome	K02871	GO:0000315//organellar large ribosomal subunit;GO:0005840//ribosome;GO:0022625//cytosolic large ribosomal subunit	GO:0003735//structural constituent of ribosome	GO:0006412//translation
State 1,2,3,4 -vs- State 1,2,3,5	SK1G00040700	3	2.8152e-18	9.65265e-17	PYRC	XP_015621519.1 dihydroorotase, mitochondrial [Oryza sativa Japonica Group]	Metabolism;Metabolism	Global and overview maps;Nucleotide metabolism	ko01100//Metabolic pathways;ko00240//Pyrimidine metabolism	K01465;K01465	-	GO:0004151//dihydroorotase activity;GO:0016787//hydrolase activity	GO:0009220//pyrimidine ribonucleotide biosynthetic process
State 1,2,3,4 -vs- State 1,2,3,5	SK1G00040723	3	1.29936e-08	2.3915e-07	PME53	XP_015635832.1 probable pectinesterase 53 [Oryza sativa Japonica Group]	Metabolism;Metabolism	Global and overview maps;Carbohydrate metabolism	ko01100//Metabolic pathways;ko00040//Pentose and glucuronate interconversions	K01051;K01051	-	GO:0030599//pectinesterase activity	GO:0042545//cell wall modification
State 1,2,3,4 -vs- State 1,2,3,5	SK1G00040725	5	2.03333e-22	8.29253e-21	--	EAY75778.1 hypothetical protein OsI_03694 [Oryza sativa Indica Group]	-	-	-	-	-	GO:0005515//protein binding	-
State 1,2,3,4 -vs- State 1,2,3,5	SK1G00040730	4	3.05623e-11	7.04043e-10	LOS1	EAY75772.1 hypothetical protein OsI_03688 [Oryza sativa Indica Group]	-	-	-	-	GO:0005737//cytoplasm	GO:0003743//translation initiation factor activity;GO:0003746//translation elongation factor activity;GO:0003747//translation release factor activity;GO:0003924//GTPase activity;GO:0004781//sulfate adenylyltransferase (ATP) activity;GO:0005525//GTP binding;GO:0043022//ribosome binding	GO:0000103//sulfate assimilation;GO:0001514//selenocysteine incorporation;GO:0006412//translation;GO:0006413//translational initiation;GO:0006414//translational elongation;GO:0006415//translational termination;GO:0006950//response to stress;GO:0042254//ribosome biogenesis
State 1,2,3,4 -vs- State 1,2,3,5	SK1G00040733	2	4.87689e-23	2.04289e-21	IAA6	EAY75770.1 hypothetical protein OsI_03686 [Oryza sativa Indica Group]	Environmental Information Processing	Signal transduction	ko04075//Plant hormone signal transduction	K14484	-	-	-
State 1,2,3,4 -vs- State 1,2,3,5	SK1G00040744	4	3.59136e-129	1.34287e-126	--	EAY75762.1 hypothetical protein OsI_03675 [Oryza sativa Indica Group]	-	-	-	-	GO:0001669//acrosomal vesicle	-	GO:0007340//acrosome reaction;GO:0007342//fusion of sperm to egg plasma membrane
State 1,2,3,4 -vs- State 1,2,3,5	SK1G00040767	1	2.5436e-14	7.12009e-13	RTNLB1	EAY75742.1 hypothetical protein OsI_03655 [Oryza sativa Indica Group]	-	-	-	-	-	-	-
State 1,2,3,4 -vs- State 1,2,3,5	SK1G00040821	3	2.75233e-08	4.89821e-07	--	EAY75686.1 hypothetical protein OsI_03594 [Oryza sativa Indica Group]	-	-	-	-	-	-	-
State 1,2,3,4 -vs- State 1,2,3,5	SK1G00040825	2	8.86936e-12	2.10741e-10	PDF1	KAB8083310.1 hypothetical protein EE612_005462, partial [Oryza sativa]	-	-	-	-	-	-	-
State 1,2,3,4 -vs- State 1,2,3,5	SK1G00040839	4	1.0821e-15	3.23555e-14	Os01g0723600	EAY75668.1 hypothetical protein OsI_03574 [Oryza sativa Indica Group]	-	-	-	-	GO:0005737//cytoplasm	GO:0000287//magnesium ion binding;GO:0003999//adenine phosphoribosyltransferase activity;GO:0004422//hypoxanthine phosphoribosyltransferase activity;GO:0004588//orotate phosphoribosyltransferase activity;GO:0004749//ribose phosphate diphosphokinase activity	GO:0006166//purine ribonucleoside salvage;GO:0009116//nucleoside metabolic process;GO:0009152//purine ribonucleotide biosynthetic process;GO:0009165//nucleotide biosynthetic process;GO:0009220//pyrimidine ribonucleotide biosynthetic process
State 1,2,3,4 -vs- State 1,2,3,5	SK1G00040842	5	2.09875e-39	1.4851e-37	RPS24A	XP_015614819.1 40S ribosomal protein S24-1 [Oryza sativa Japonica Group]	Genetic Information Processing	Translation	ko03010//Ribosome	K02974	GO:0005840//ribosome	GO:0003735//structural constituent of ribosome;GO:0005085//guanyl-nucleotide exchange factor activity	GO:0006412//translation
State 1,2,3,4 -vs- State 1,2,3,5	SK1G00040855	2	6.86863e-15	1.98849e-13	--	EAY75646.1 hypothetical protein OsI_03551 [Oryza sativa Indica Group]	-	-	-	-	-	GO:0043531//ADP binding	-
State 1,2,3,4 -vs- State 1,2,3,5	SK1G00040858	1	8.66558e-11	1.91549e-09	At1g17710	EAY75640.1 hypothetical protein OsI_03545 [Oryza sativa Indica Group]	Metabolism;Metabolism	Global and overview maps;Lipid metabolism	ko01100//Metabolic pathways;ko00564//Glycerophospholipid metabolism	K06124;K06124	-	GO:0016787//hydrolase activity;GO:0016791//phosphatase activity	GO:0008152//metabolic process
State 1,2,3,4 -vs- State 1,2,3,5	SK1G00040886	1	1.97461e-13	5.24622e-12	IP5P3	KAB8083223.1 hypothetical protein EE612_005348 [Oryza sativa]	-	-	-	-	-	-	-
State 1,2,3,4 -vs- State 1,2,3,5	SK1G00040888	4	2.90585e-15	8.55899e-14	--	EAY75611.1 hypothetical protein OsI_03515 [Oryza sativa Indica Group]	-	-	-	-	GO:0010007//magnesium chelatase complex	GO:0005488//binding;GO:0008168//methyltransferase activity;GO:0008170//N-methyltransferase activity;GO:0008171//O-methyltransferase activity;GO:0008689//3-demethylubiquinone-9 3-O-methyltransferase activity;GO:0008757//S-adenosylmethionine-dependent methyltransferase activity;GO:0016851//magnesium chelatase activity;GO:0046025//precorrin-6Y C5,15-methyltransferase (decarboxylating) activity;GO:00…	GO:0006412//translation;GO:0006744//ubiquinone biosynthetic process;GO:0008299//isoprenoid biosynthetic process;GO:0009102//biotin biosynthetic process;GO:0015995//chlorophyll biosynthetic process;GO:0018364//peptidyl-glutamine methylation;GO:0044272//sulfur compound biosynthetic process;GO:0046140//corrin biosynthetic process;GO:0055114//oxidation-reduction process
State 1,2,3,4 -vs- State 1,2,3,5	SK1G00040922	3	1.9526e-17	6.44014e-16	GDCSP	EAY75571.1 hypothetical protein OsI_03474 [Oryza sativa Indica Group]	Metabolism;Metabolism;Metabolism;Metabolism;Metabolism	Global and overview maps;Global and overview maps;Global and overview maps;Carbohydrate metabolism;Amino acid metabolism	ko01100//Metabolic pathways;ko01110//Biosynthesis of secondary metabolites;ko01200//Carbon metabolism;ko00630//Glyoxylate and dicarboxylate metabolism;ko00260//Glycine, serine and threonine metabolism	K00281;K00281;K00281;K00281;K00281	-	GO:0004375//glycine dehydrogenase (decarboxylating) activity;GO:0004837//tyrosine decarboxylase activity;GO:0016829//lyase activity;GO:0018826//methionine gamma-lyase activity;GO:0031071//cysteine desulfurase activity	GO:0006520//cellular amino acid metabolic process;GO:0006546//glycine catabolic process;GO:0009087//methionine catabolic process;GO:0009093//cysteine catabolic process;GO:0016226//iron-sulfur cluster assembly;GO:0019464//glycine decarboxylation via glycine cleavage system;GO:0051188//cofactor biosynthetic process;GO:0055114//oxidation-reduction process
State 1,2,3,4 -vs- State 1,2,3,5	SK1G00040933	5	2.41252e-11	5.58655e-10	MSI4	XP_015621920.2 WD-40 repeat-containing protein MSI4 isoform X1 [Oryza sativa Japonica Group]	-	-	-	-	-	GO:0005515//protein binding	-
State 1,2,3,4 -vs- State 1,2,3,5	SK1G00040962	5	1.38116e-10	2.99521e-09	LEA14	APU66353.1 late embryogenesis abundant protein group 3 protein [Oryza sativa Indica Group]	-	-	-	-	-	-	-
State 1,2,3,4 -vs- State 1,2,3,5	SK1G00041003	4	7.11339e-28	3.53896e-26	MAPKKK17	XP_015689680.1 PREDICTED: serine/threonine-protein kinase TAO3-like [Oryza brachyantha]	-	-	-	-	-	GO:0004672//protein kinase activity;GO:0005524//ATP binding;GO:0016709//oxidoreductase activity, acting on paired donors, with incorporation or reduction of molecular oxygen, NAD(P)H as one donor, and incorporation of one atom of oxygen;GO:0045735//nutrient reservoir activity	GO:0006468//protein phosphorylation;GO:0006744//ubiquinone biosynthetic process;GO:0009405//pathogenesis
State 1,2,3,4 -vs- State 1,2,3,5	SK1G00041004	5	1.0207e-08	1.89631e-07	MAPKKK17	EAY75501.1 hypothetical protein OsI_03400 [Oryza sativa Indica Group]	Environmental Information Processing	Signal transduction	ko04016//MAPK signaling pathway - plant	K20716	-	GO:0004672//protein kinase activity;GO:0005524//ATP binding	GO:0006468//protein phosphorylation;GO:0016567//protein ubiquitination
State 1,2,3,4 -vs- State 1,2,3,5	SK1G00041020	2	1.91804e-51	1.9411e-49	ABCB11	EAY75483.1 hypothetical protein OsI_03383 [Oryza sativa Indica Group]	Environmental Information Processing	Membrane transport	ko02010//ABC transporters	K05658	GO:0005575//cellular_component;GO:0005737//cytoplasm;GO:0005887//integral component of plasma membrane;GO:0009380//excinuclease repair complex;GO:0009898//cytoplasmic side of plasma membrane;GO:0016021//integral component of membrane;GO:0043190//ATP-binding cassette (ABC) transporter complex;GO:0055051//ATP-binding cassette (ABC) transporter complex, integrated substrate binding;GO:0055052//ATP-b…	GO:0000166//nucleotide binding;GO:0003674//molecular_function;GO:0003676//nucleic acid binding;GO:0003677//DNA binding;GO:0003924//GTPase activity;GO:0004020//adenylylsulfate kinase activity;GO:0004140//dephospho-CoA kinase activity;GO:0005260//channel-conductance-controlling ATPase activity;GO:0005319//lipid transporter activity;GO:0005524//ATP binding;GO:0005525//GTP binding;GO:0008565//protein…	GO:0000910//cytokinesis;GO:0006289//nucleotide-excision repair;GO:0006790//sulfur compound metabolic process;GO:0006810//transport;GO:0006817//phosphate ion transport;GO:0006824//cobalt ion transport;GO:0006855//drug transmembrane transport;GO:0006869//lipid transport;GO:0007186//G-protein coupled receptor signaling pathway;GO:0007601//visual perception;GO:0008150//biological_process;GO:0008272//…
State 1,2,3,4 -vs- State 1,2,3,5	SK1G00041025	4	1.53927e-16	4.83874e-15	ABCB11	EEC71330.1 hypothetical protein OsI_03378 [Oryza sativa Indica Group]	Environmental Information Processing	Membrane transport	ko02010//ABC transporters	K05658	GO:0005575//cellular_component;GO:0005737//cytoplasm;GO:0005887//integral component of plasma membrane;GO:0009380//excinuclease repair complex;GO:0009898//cytoplasmic side of plasma membrane;GO:0016021//integral component of membrane;GO:0043190//ATP-binding cassette (ABC) transporter complex;GO:0055051//ATP-binding cassette (ABC) transporter complex, integrated substrate binding;GO:0055052//ATP-b…	GO:0003674//molecular_function;GO:0003924//GTPase activity;GO:0004020//adenylylsulfate kinase activity;GO:0004140//dephospho-CoA kinase activity;GO:0004849//uridine kinase activity;GO:0005260//channel-conductance-controlling ATPase activity;GO:0005319//lipid transporter activity;GO:0005524//ATP binding;GO:0005525//GTP binding;GO:0008134//transcription factor binding;GO:0008565//protein transporte…	GO:0000910//cytokinesis;GO:0006289//nucleotide-excision repair;GO:0006355//regulation of transcription, DNA-templated;GO:0006790//sulfur compound metabolic process;GO:0006810//transport;GO:0006817//phosphate ion transport;GO:0006824//cobalt ion transport;GO:0006855//drug transmembrane transport;GO:0006869//lipid transport;GO:0007186//G-protein coupled receptor signaling pathway;GO:0007601//visual…
State 1,2,3,4 -vs- State 1,2,3,5	SK1G00041049	4	1.92129e-09	3.81487e-08	LPP2	EAY75456.1 hypothetical protein OsI_03357 [Oryza sativa Indica Group]	Metabolism;Metabolism;Metabolism	Global and overview maps;Lipid metabolism;Lipid metabolism	ko01110//Biosynthesis of secondary metabolites;ko00564//Glycerophospholipid metabolism;ko00561//Glycerolipid metabolism	K18693;K18693;K18693	-	GO:0005451//monovalent cation:proton antiporter activity	GO:0015672//monovalent inorganic cation transport;GO:0015992//proton transport
State 1,2,3,4 -vs- State 1,2,3,5	SK1G00041084	3	1.13168e-44	9.43655e-43	RACK1A	XP_015620921.1 guanine nucleotide-binding protein subunit beta-like protein A [Oryza sativa Japonica Group]	-	-	-	-	GO:0033588//Elongator holoenzyme complex	GO:0005515//protein binding	GO:0002098//tRNA wobble uridine modification
State 1,2,3,4 -vs- State 1,2,3,5	SK1G00041093	5	1.13263e-13	3.05956e-12	ATPB	XP_015620979.1 ATP synthase subunit beta, mitochondrial-like [Oryza sativa Japonica Group]	Metabolism;Metabolism	Global and overview maps;Energy metabolism	ko01100//Metabolic pathways;ko00190//Oxidative phosphorylation	K02133;K02133	GO:0000275//mitochondrial proton-transporting ATP synthase complex, catalytic core F(1);GO:0009288//bacterial-type flagellum;GO:0016469//proton-transporting two-sector ATPase complex;GO:0016471//vacuolar proton-transporting V-type ATPase complex;GO:0030257//type III protein secretion system complex;GO:0045261//proton-transporting ATP synthase complex, catalytic core F(1);GO:0045262//plasma membra…	GO:0003924//GTPase activity;GO:0004386//helicase activity;GO:0005524//ATP binding;GO:0005525//GTP binding;GO:0008186//RNA-dependent ATPase activity;GO:0008553//hydrogen-exporting ATPase activity, phosphorylative mechanism;GO:0016887//ATPase activity;GO:0043531//ADP binding;GO:0046933//proton-transporting ATP synthase activity, rotational mechanism;GO:0046961//proton-transporting ATPase activity, …	GO:0001539//cilium or flagellum-dependent cell motility;GO:0006353//DNA-templated transcription, termination;GO:0006754//ATP biosynthetic process;GO:0009405//pathogenesis;GO:0015986//ATP synthesis coupled proton transport;GO:0015991//ATP hydrolysis coupled proton transport;GO:0030254//protein secretion by the type III secretion system;GO:0046034//ATP metabolic process;GO:1902600//hydrogen ion tra…
State 1,2,3,4 -vs- State 1,2,3,5	SK1G00041103	4	1.55202e-18	5.36815e-17	--	EEC71284.1 hypothetical protein OsI_03297 [Oryza sativa Indica Group]	-	-	-	-	-	-	-
State 1,2,3,4 -vs- State 1,2,3,5	SK1G00041112	2	3.94973e-08	6.90464e-07	Os01g0681900	EAY75387.1 hypothetical protein OsI_03285 [Oryza sativa Indica Group]	Metabolism;Metabolism;Metabolism;Metabolism;Metabolism	Global and overview maps;Global and overview maps;Global and overview maps;Amino acid metabolism;Energy metabolism	ko01100//Metabolic pathways;ko01110//Biosynthesis of secondary metabolites;ko01230//Biosynthesis of amino acids;ko00250//Alanine, aspartate and glutamate metabolism;ko00910//Nitrogen metabolism	K00264;K00264;K00264;K00264;K00264	GO:0009342//glutamate synthase complex (NADPH)	GO:0003824//catalytic activity;GO:0004148//dihydrolipoyl dehydrogenase activity;GO:0004355//glutamate synthase (NADPH) activity;GO:0004362//glutathione-disulfide reductase activity;GO:0004452//isopentenyl-diphosphate delta-isomerase activity;GO:0004499//N,N-dimethylaniline monooxygenase activity;GO:0004729//oxygen-dependent protoporphyrinogen oxidase activity;GO:0004791//thioredoxin-disulfide red…	GO:0006096//glycolytic process;GO:0006537//glutamate biosynthetic process;GO:0006779//porphyrin-containing compound biosynthetic process;GO:0006790//sulfur compound metabolic process;GO:0006805//xenobiotic metabolic process;GO:0006807//nitrogen compound metabolic process;GO:0008299//isoprenoid biosynthetic process;GO:0009228//thiamine biosynthetic process;GO:0009398//FMN biosynthetic process;GO:0…
State 1,2,3,4 -vs- State 1,2,3,5	SK1G00041117	2	3.59766e-80	6.83402e-78	LACS4	XP_015621736.1 long chain acyl-CoA synthetase 4 isoform X1 [Oryza sativa Japonica Group]	Metabolism;Cellular Processes;Metabolism;Metabolism;Metabolism	Global and overview maps;Transport and catabolism;Global and overview maps;Lipid metabolism;Lipid metabolism	ko01100//Metabolic pathways;ko04146//Peroxisome;ko01212//Fatty acid metabolism;ko00071//Fatty acid degradation;ko00061//Fatty acid biosynthesis	K01897;K01897;K01897;K01897;K01897	-	GO:0003987//acetate-CoA ligase activity;GO:0004043//L-aminoadipate-semialdehyde dehydrogenase activity;GO:0008668//(2,3-dihydroxybenzoyl)adenylate synthase activity;GO:0008756//o-succinylbenzoate-CoA ligase activity;GO:0030729//acetoacetate-CoA ligase activity;GO:0047473//D-alanine-poly(phosphoribitol) ligase activity;GO:0050218//propionate-CoA ligase activity	GO:0009234//menaquinone biosynthetic process;GO:0019287//isopentenyl diphosphate biosynthetic process, mevalonate pathway;GO:0019290//siderophore biosynthetic process;GO:0019350//teichoic acid biosynthetic process;GO:0019427//acetyl-CoA biosynthetic process from acetate;GO:0019878//lysine biosynthetic process via aminoadipic acid
State 1,2,3,4 -vs- State 1,2,3,5	SK1G00041126	5	1.10185e-30	5.97557e-29	Os01g0679700	NP_001147066.1 60S ribosomal protein L37a isoform 2 [Zea mays]	Genetic Information Processing	Translation	ko03010//Ribosome	K02921	GO:0000315//organellar large ribosomal subunit;GO:0005840//ribosome;GO:0022625//cytosolic large ribosomal subunit	GO:0003735//structural constituent of ribosome;GO:0008270//zinc ion binding;GO:0051539//4 iron, 4 sulfur cluster binding;GO:0070283//radical SAM enzyme activity	GO:0006412//translation;GO:0015948//methanogenesis;GO:0035556//intracellular signal transduction;GO:0046500//S-adenosylmethionine metabolic process
State 1,2,3,4 -vs- State 1,2,3,5	SK1G00041149	4	6.87085e-13	1.75209e-11	IRX9L	EAY75350.1 hypothetical protein OsI_03246 [Oryza sativa Indica Group]	-	-	-	-	GO:0016020//membrane	GO:0015018//galactosylgalactosylxylosylprotein 3-beta-glucuronosyltransferase activity	-
State 1,2,3,4 -vs- State 1,2,3,5	SK1G00041151	1	3.89202e-12	9.48233e-11	PRXIIC	XP_015622003.1 peroxiredoxin-2C [Oryza sativa Japonica Group]	-	-	-	-	GO:0009427//bacterial-type flagellum basal body, distal rod, L ring	GO:0003774//motor activity;GO:0016209//antioxidant activity;GO:0016491//oxidoreductase activity;GO:0051920//peroxiredoxin activity	GO:0006979//response to oxidative stress;GO:0055114//oxidation-reduction process;GO:0071973//bacterial-type flagellum-dependent cell motility
State 1,2,3,4 -vs- State 1,2,3,5	SK1G00041160	3	6.11658e-16	1.85704e-14	ASIL2	EAY75340.1 hypothetical protein OsI_03233 [Oryza sativa Indica Group]	-	-	-	-	GO:0005634//nucleus	GO:0051116//cobaltochelatase activity	GO:0009236//cobalamin biosynthetic process
State 1,2,3,4 -vs- State 1,2,3,5	SK1G00041164	5	3.43384e-09	6.66176e-08	DOF1.5	XP_015619286.1 dof zinc finger protein 5-like [Oryza sativa Japonica Group]	-	-	-	-	-	GO:0003677//DNA binding	GO:0006355//regulation of transcription, DNA-templated
State 1,2,3,4 -vs- State 1,2,3,5	SK1G00041175	3	5.27069e-08	9.11516e-07	DI19-3	BAS73621.1 Os01g0672400 [Oryza sativa Japonica Group]	-	-	-	-	-	-	-
State 1,2,3,4 -vs- State 1,2,3,5	SK1G00041195	5	1.42934e-09	2.8734e-08	RABA1F	XP_015615400.1 ras-related protein RABA1f [Oryza sativa Japonica Group]	-	-	-	-	GO:0005737//cytoplasm	GO:0003677//DNA binding;GO:0003924//GTPase activity;GO:0005524//ATP binding;GO:0005525//GTP binding;GO:0016887//ATPase activity;GO:0017111//nucleoside-triphosphatase activity;GO:0043022//ribosome binding;GO:0051539//4 iron, 4 sulfur cluster binding	GO:0006400//tRNA modification;GO:0032508//DNA duplex unwinding;GO:0042254//ribosome biogenesis;GO:0051186//cofactor metabolic process
State 1,2,3,4 -vs- State 1,2,3,5	SK1G00041202	5	2.18879e-33	1.3178e-31	RPL18A	XP_015651447.1 60S ribosomal protein L18a-like [Oryza sativa Japonica Group]	Genetic Information Processing	Translation	ko03010//Ribosome	K02882	GO:0005840//ribosome	GO:0003735//structural constituent of ribosome	GO:0006412//translation
State 1,2,3,4 -vs- State 1,2,3,5	SK1G00041214	5	9.96237e-10	2.02798e-08	WRKY28	EAY75285.1 hypothetical protein OsI_03172 [Oryza sativa Indica Group]	-	-	-	-	-	GO:0003700//transcription factor activity, sequence-specific DNA binding;GO:0043565//sequence-specific DNA binding	GO:0006355//regulation of transcription, DNA-templated
State 1,2,3,4 -vs- State 1,2,3,5	SK1G00041234	3	4.52386e-53	4.78263e-51	RPL12-2	XP_015624137.1 50S ribosomal protein L12, chloroplastic [Oryza sativa Japonica Group]	Genetic Information Processing	Translation	ko03010//Ribosome	K02935	GO:0000315//organellar large ribosomal subunit;GO:0005840//ribosome;GO:0022625//cytosolic large ribosomal subunit	GO:0003735//structural constituent of ribosome	GO:0006412//translation
State 1,2,3,4 -vs- State 1,2,3,5	SK1G00041250	2	1.56043e-09	3.12631e-08	CHIT3	XP_015622676.1 acidic endochitinase [Oryza sativa Japonica Group]	Metabolism;Metabolism	Global and overview maps;Carbohydrate metabolism	ko01100//Metabolic pathways;ko00520//Amino sugar and nucleotide sugar metabolism	K01183;K01183	-	-	GO:0005975//carbohydrate metabolic process;GO:0019048//modulation by virus of host morphology or physiology
State 1,2,3,4 -vs- State 1,2,3,5	SK1G00041276	4	1.17602e-14	3.37708e-13	CICDH	XP_015612407.1 cytosolic isocitrate dehydrogenase [NADP] [Oryza sativa Japonica Group]	Metabolism;Metabolism;Metabolism;Metabolism;Metabolism;Cellular Processes;Metabolism;Metabolism	Global and overview maps;Global and overview maps;Global and overview maps;Global and overview maps;Metabolism of other amino acids;Transport and catabolism;Carbohydrate metabolism;Global and overview maps	ko01100//Metabolic pathways;ko01110//Biosynthesis of secondary metabolites;ko01200//Carbon metabolism;ko01230//Biosynthesis of amino acids;ko00480//Glutathione metabolism;ko04146//Peroxisome;ko00020//Citrate cycle (TCA cycle);ko01210//2-Oxocarboxylic acid metabolism	K00031;K00031;K00031;K00031;K00031;K00031;K00031;K00031	GO:0005962//mitochondrial isocitrate dehydrogenase complex (NAD+);GO:0045243//cytosolic isocitrate dehydrogenase complex (NAD+)	GO:0003862//3-isopropylmalate dehydrogenase activity;GO:0004449//isocitrate dehydrogenase (NAD+) activity;GO:0004450//isocitrate dehydrogenase (NADP+) activity;GO:0016616//oxidoreductase activity, acting on the CH-OH group of donors, NAD or NADP as acceptor	GO:0006099//tricarboxylic acid cycle;GO:0006102//isocitrate metabolic process;GO:0009098//leucine biosynthetic process;GO:0055114//oxidation-reduction process
State 1,2,3,4 -vs- State 1,2,3,5	SK1G00041280	1	4.08666e-29	2.10692e-27	ctps2	XP_015622258.1 CTP synthase isoform X2 [Oryza sativa Japonica Group]	Metabolism;Metabolism	Global and overview maps;Nucleotide metabolism	ko01100//Metabolic pathways;ko00240//Pyrimidine metabolism	K01937;K01937	GO:0005951//carbamoyl-phosphate synthase complex	GO:0000107//imidazoleglycerol-phosphate synthase activity;GO:0003883//CTP synthase activity;GO:0003922//GMP synthase (glutamine-hydrolyzing) activity;GO:0004088//carbamoyl-phosphate synthase (glutamine-hydrolyzing) activity;GO:0016787//hydrolase activity;GO:0016884//carbon-nitrogen ligase activity, with glutamine as amido-N-donor	GO:0000105//histidine biosynthetic process;GO:0006177//GMP biosynthetic process;GO:0006221//pyrimidine nucleotide biosynthetic process;GO:0009220//pyrimidine ribonucleotide biosynthetic process
State 1,2,3,4 -vs- State 1,2,3,5	SK1G00041310	5	1.92187e-48	1.80128e-46	MMDH	XP_015621604.1 malate dehydrogenase, mitochondrial [Oryza sativa Japonica Group]	Metabolism;Metabolism;Metabolism;Metabolism;Metabolism;Metabolism;Metabolism;Metabolism	Global and overview maps;Global and overview maps;Global and overview maps;Amino acid metabolism;Carbohydrate metabolism;Energy metabolism;Carbohydrate metabolism;Carbohydrate metabolism	ko01100//Metabolic pathways;ko01110//Biosynthesis of secondary metabolites;ko01200//Carbon metabolism;ko00270//Cysteine and methionine metabolism;ko00620//Pyruvate metabolism;ko00710//Carbon fixation in photosynthetic organisms;ko00630//Glyoxylate and dicarboxylate metabolism;ko00020//Citrate cycle (TCA cycle)	K00026;K00026;K00026;K00026;K00026;K00026;K00026;K00026	GO:0005737//cytoplasm	GO:0003854//3-beta-hydroxy-delta5-steroid dehydrogenase activity;GO:0004459//L-lactate dehydrogenase activity;GO:0004553//hydrolase activity, hydrolyzing O-glycosyl compounds;GO:0016491//oxidoreductase activity;GO:0016616//oxidoreductase activity, acting on the CH-OH group of donors, NAD or NADP as acceptor;GO:0030060//L-malate dehydrogenase activity	GO:0005975//carbohydrate metabolic process;GO:0006099//tricarboxylic acid cycle;GO:0006694//steroid biosynthetic process;GO:0055114//oxidation-reduction process
State 1,2,3,4 -vs- State 1,2,3,5	SK1G00041334	3	1.82568e-20	6.88449e-19	BASS2	XP_015621662.1 probable sodium/metabolite cotransporter BASS2, chloroplastic [Oryza sativa Japonica Group]	-	-	-	-	GO:0016020//membrane	GO:0008490//arsenite secondary active transmembrane transporter activity;GO:0008508//bile acid:sodium symporter activity	GO:0015700//arsenite transport;GO:0015721//bile acid and bile salt transport;GO:0046685//response to arsenic-containing substance
State 1,2,3,4 -vs- State 1,2,3,5	SK1G00041335	4	8.71795e-32	4.94695e-30	Os01g0645000	XP_015631641.1 zinc finger CCCH domain-containing protein 9 isoform X1 [Oryza sativa Japonica Group]	-	-	-	-	-	GO:0046872//metal ion binding	-
State 1,2,3,4 -vs- State 1,2,3,5	SK1G00041340	4	2.93322e-29	1.52108e-27	--	XP_015648357.1 uncharacterized protein LOC4326569 [Oryza sativa Japonica Group]	-	-	-	-	-	-	-
State 1,2,3,4 -vs- State 1,2,3,5	SK1G00041344	5	1.92961e-10	4.1441e-09	At4g11060	XP_015622362.1 single-stranded DNA-binding protein, mitochondrial [Oryza sativa Japonica Group]	Genetic Information Processing;Genetic Information Processing;Genetic Information Processing	Replication and repair;Replication and repair;Replication and repair	ko03440//Homologous recombination;ko03030//DNA replication;ko03430//Mismatch repair	K03111;K03111;K03111	GO:0005856//cytoskeleton	GO:0003697//single-stranded DNA binding	GO:0006260//DNA replication;GO:0006281//DNA repair;GO:0006310//DNA recombination
State 1,2,3,4 -vs- State 1,2,3,5	SK1G00041359	2	9.80829e-89	2.27719e-86	--	XP_015617246.1 carbonic anhydrase, chloroplastic isoform X3 [Oryza sativa Japonica Group]	Metabolism;Metabolism	Global and overview maps;Energy metabolism	ko01100//Metabolic pathways;ko00910//Nitrogen metabolism	K01673;K01673	-	-	-
State 1,2,3,4 -vs- State 1,2,3,5	SK1G00041375	2	4.87964e-16	1.4853e-14	--	XP_015628722.1 epoxide hydrolase 3 [Oryza sativa Japonica Group]	-	-	-	-	-	GO:0003674//molecular_function;GO:0003824//catalytic activity;GO:0004414//homoserine O-acetyltransferase activity;GO:0008236//serine-type peptidase activity;GO:0016787//hydrolase activity;GO:0016788//hydrolase activity, acting on ester bonds;GO:0047570//3-oxoadipate enol-lactonase activity;GO:0070205//2-succinyl-6-hydroxy-2,4-cyclohexadiene-1-carboxylate synthase activity	GO:0006112//energy reserve metabolic process;GO:0006508//proteolysis;GO:0009086//methionine biosynthetic process;GO:0009102//biotin biosynthetic process;GO:0009234//menaquinone biosynthetic process;GO:0015979//photosynthesis;GO:0030163//protein catabolic process;GO:0042952//beta-ketoadipate pathway
State 1,2,3,4 -vs- State 1,2,3,5	SK1G00041393	3	7.03968e-34	4.27459e-32	RPL31	XP_015625272.1 uncharacterized protein LOC4326593 [Oryza sativa Japonica Group]	Genetic Information Processing	Translation	ko03010//Ribosome	K02909	GO:0000315//organellar large ribosomal subunit;GO:0005840//ribosome;GO:0022625//cytosolic large ribosomal subunit	GO:0003735//structural constituent of ribosome	GO:0006412//translation
State 1,2,3,4 -vs- State 1,2,3,5	SK1G00041403	2	1.29291e-11	3.0395e-10	GPAT1	XP_015634691.1 glycerol-3-phosphate acyltransferase 1 [Oryza sativa Japonica Group]	Metabolism;Metabolism;Metabolism;Metabolism	Global and overview maps;Global and overview maps;Lipid metabolism;Lipid metabolism	ko01100//Metabolic pathways;ko01110//Biosynthesis of secondary metabolites;ko00564//Glycerophospholipid metabolism;ko00561//Glycerolipid metabolism	K13508;K13508;K13508;K13508	-	GO:0016746//transferase activity, transferring acyl groups	-
State 1,2,3,4 -vs- State 1,2,3,5	SK1G00041418	2	2.30578e-14	6.47477e-13	CYP72A11	XP_025815404.1 uncharacterized protein LOC112892460 [Panicum hallii]	-	-	-	-	-	GO:0005506//iron ion binding;GO:0016705//oxidoreductase activity, acting on paired donors, with incorporation or reduction of molecular oxygen;GO:0020037//heme binding	GO:0055114//oxidation-reduction process
State 1,2,3,4 -vs- State 1,2,3,5	SK1G00041421	2	6.66398e-15	1.93239e-13	CYP72A15	XP_015615867.1 cytochrome P450 72A15 [Oryza sativa Japonica Group]	-	-	-	-	GO:0005737//cytoplasm	GO:0004802//transketolase activity;GO:0005506//iron ion binding;GO:0016705//oxidoreductase activity, acting on paired donors, with incorporation or reduction of molecular oxygen;GO:0016884//carbon-nitrogen ligase activity, with glutamine as amido-N-donor;GO:0020037//heme binding	GO:0006098//pentose-phosphate shunt;GO:0055114//oxidation-reduction process
State 1,2,3,4 -vs- State 1,2,3,5	SK1G00041432	1	2.21919e-09	4.3859e-08	KIN13B	XP_015620912.1 kinesin-like protein KIN-13B [Oryza sativa Japonica Group]	-	-	-	-	GO:0016021//integral component of membrane	GO:0005524//ATP binding;GO:0008017//microtubule binding	GO:0007018//microtubule-based movement;GO:0009405//pathogenesis
State 1,2,3,4 -vs- State 1,2,3,5	SK1G00041435	5	3.03997e-13	7.96356e-12	SGT1	XP_015621707.1 protein SGT1 homolog [Oryza sativa Japonica Group]	Organismal Systems	Environmental adaptation	ko04626//Plant-pathogen interaction	K12795	-	GO:0005515//protein binding	-
State 1,2,3,4 -vs- State 1,2,3,5	SK1G00041484	1	2.58715e-10	5.50964e-09	ctps	BAS73176.1 Os01g0616900 [Oryza sativa Japonica Group]	Metabolism;Metabolism	Global and overview maps;Nucleotide metabolism	ko01100//Metabolic pathways;ko00240//Pyrimidine metabolism	K01937;K01937	GO:0005951//carbamoyl-phosphate synthase complex	GO:0000107//imidazoleglycerol-phosphate synthase activity;GO:0003883//CTP synthase activity;GO:0003922//GMP synthase (glutamine-hydrolyzing) activity;GO:0004088//carbamoyl-phosphate synthase (glutamine-hydrolyzing) activity;GO:0016787//hydrolase activity;GO:0016884//carbon-nitrogen ligase activity, with glutamine as amido-N-donor	GO:0000105//histidine biosynthetic process;GO:0006177//GMP biosynthetic process;GO:0006221//pyrimidine nucleotide biosynthetic process;GO:0009220//pyrimidine ribonucleotide biosynthetic process
State 1,2,3,4 -vs- State 1,2,3,5	SK1G00041497	2	1.62209e-236	1.5573e-233	--	AAW72834.1 subitilisin-chymotrypsin inhibitor [Oryza sativa Japonica Group]	-	-	-	-	-	GO:0004867//serine-type endopeptidase inhibitor activity	GO:0009611//response to wounding
State 1,2,3,4 -vs- State 1,2,3,5	SK1G00041498	2	1.78164e-52	1.8614e-50	--	AAW72835.1 subitilisin-chymotrypsin inhibitor [Oryza sativa Japonica Group]	-	-	-	-	-	GO:0004867//serine-type endopeptidase inhibitor activity	GO:0009611//response to wounding
State 1,2,3,4 -vs- State 1,2,3,5	SK1G00041533	2	9.5342e-11	2.10356e-09	ABCG37	XP_015648329.1 ABC transporter G family member 37 isoform X1 [Oryza sativa Japonica Group]	-	-	-	-	GO:0005575//cellular_component;GO:0005737//cytoplasm;GO:0005887//integral component of plasma membrane;GO:0009379//Holliday junction helicase complex;GO:0009380//excinuclease repair complex;GO:0009898//cytoplasmic side of plasma membrane;GO:0016020//membrane;GO:0016021//integral component of membrane;GO:0043190//ATP-binding cassette (ABC) transporter complex;GO:0055051//ATP-binding cassette (ABC)…	GO:0000166//nucleotide binding;GO:0003674//molecular_function;GO:0003723//RNA binding;GO:0003724//RNA helicase activity;GO:0003924//GTPase activity;GO:0004385//guanylate kinase activity;GO:0004386//helicase activity;GO:0005260//channel-conductance-controlling ATPase activity;GO:0005319//lipid transporter activity;GO:0005524//ATP binding;GO:0005525//GTP binding;GO:0008565//protein transporter acti…	GO:0000910//cytokinesis;GO:0002949//tRNA threonylcarbamoyladenosine modification;GO:0006281//DNA repair;GO:0006289//nucleotide-excision repair;GO:0006310//DNA recombination;GO:0006400//tRNA modification;GO:0006464//cellular protein modification process;GO:0006576//cellular biogenic amine metabolic process;GO:0006777//Mo-molybdopterin cofactor biosynthetic process;GO:0006810//transport;GO:0006817/…
State 1,2,3,4 -vs- State 1,2,3,5	SK1G00041535	2	1.96344e-12	4.87388e-11	ABCG36	RWR83060.1 ABC transporter-like protein [Cinnamomum micranthum f. kanehirae]	-	-	-	-	GO:0000502//proteasome complex;GO:0005575//cellular_component;GO:0005576//extracellular region;GO:0005737//cytoplasm;GO:0005887//integral component of plasma membrane;GO:0009338//exodeoxyribonuclease V complex;GO:0009379//Holliday junction helicase complex;GO:0009380//excinuclease repair complex;GO:0009898//cytoplasmic side of plasma membrane;GO:0015627//type II protein secretion system complex;G…	GO:0000166//nucleotide binding;GO:0003674//molecular_function;GO:0003677//DNA binding;GO:0003678//DNA helicase activity;GO:0003723//RNA binding;GO:0003724//RNA helicase activity;GO:0003924//GTPase activity;GO:0004003//ATP-dependent DNA helicase activity;GO:0004176//ATP-dependent peptidase activity;GO:0004222//metalloendopeptidase activity;GO:0004386//helicase activity;GO:0005102//receptor binding…	GO:0000910//cytokinesis;GO:0002949//tRNA threonylcarbamoyladenosine modification;GO:0006260//DNA replication;GO:0006281//DNA repair;GO:0006289//nucleotide-excision repair;GO:0006310//DNA recombination;GO:0006400//tRNA modification;GO:0006464//cellular protein modification process;GO:0006508//proteolysis;GO:0006810//transport;GO:0006817//phosphate ion transport;GO:0006824//cobalt ion transport;GO:…
State 1,2,3,4 -vs- State 1,2,3,5	SK1G00041543	2	3.29653e-56	3.85196e-54	BAT1	XP_015622189.1 amino-acid permease BAT1 homolog isoform X2 [Oryza sativa Japonica Group]	-	-	-	-	GO:0005887//integral component of plasma membrane;GO:0016020//membrane	GO:0005275//amine transmembrane transporter activity;GO:0022857//transmembrane transporter activity	GO:0015837//amine transport;GO:0055085//transmembrane transport
State 1,2,3,4 -vs- State 1,2,3,5	SK1G00041548	5	5.15239e-38	3.51967e-36	dnajb6-a	KAF2951092.1 hypothetical protein DAI22_01g237000 [Oryza sativa Japonica Group]	-	-	-	-	-	GO:0005515//protein binding	GO:0006457//protein folding;GO:0009408//response to heat
State 1,2,3,4 -vs- State 1,2,3,5	SK1G00041559	4	1.74022e-99	4.90603e-97	HSR4	XP_015621227.1 AAA-ATPase At3g50940 [Oryza sativa Japonica Group]	-	-	-	-	GO:0000502//proteasome complex;GO:0009360//DNA polymerase III complex;GO:0009379//Holliday junction helicase complex;GO:0009898//cytoplasmic side of plasma membrane;GO:0055052//ATP-binding cassette (ABC) transporter complex, substrate-binding subunit-containing	GO:0003723//RNA binding;GO:0003724//RNA helicase activity;GO:0003887//DNA-directed DNA polymerase activity;GO:0004222//metalloendopeptidase activity;GO:0004386//helicase activity;GO:0005524//ATP binding;GO:0009378//four-way junction helicase activity;GO:0015412//molybdate transmembrane-transporting ATPase activity;GO:0016818//hydrolase activity, acting on acid anhydrides, in phosphorus-containing…	GO:0006260//DNA replication;GO:0006281//DNA repair;GO:0006310//DNA recombination;GO:0006508//proteolysis;GO:0010498//proteasomal protein catabolic process;GO:0015689//molybdate ion transport;GO:0019941//modification-dependent protein catabolic process;GO:0032297//negative regulation of DNA-dependent DNA replication initiation;GO:0051301//cell division
State 1,2,3,4 -vs- State 1,2,3,5	SK1G00041600	4	2.62352e-16	8.14249e-15	TOGT1	XP_015621166.1 scopoletin glucosyltransferase [Oryza sativa Japonica Group]	Metabolism;Metabolism	Global and overview maps;Biosynthesis of other secondary metabolites	ko01110//Biosynthesis of secondary metabolites;ko00940//Phenylpropanoid biosynthesis	K23260;K23260	-	GO:0008194//UDP-glycosyltransferase activity	-
State 1,2,3,4 -vs- State 1,2,3,5	SK1G00041611	4	8.15474e-09	1.52781e-07	D14	XP_015650138.1 probable esterase KAI2 [Oryza sativa Japonica Group]	-	-	-	-	-	GO:0003674//molecular_function;GO:0003824//catalytic activity;GO:0047570//3-oxoadipate enol-lactonase activity;GO:0070205//2-succinyl-6-hydroxy-2,4-cyclohexadiene-1-carboxylate synthase activity	GO:0009102//biotin biosynthetic process;GO:0009234//menaquinone biosynthetic process;GO:0015979//photosynthesis;GO:0042952//beta-ketoadipate pathway
State 1,2,3,4 -vs- State 1,2,3,5	SK1G00041635	4	2.56567e-22	1.04277e-20	ALDH2C4	KAB8082074.1 hypothetical protein EE612_003819 [Oryza sativa]	Metabolism	Biosynthesis of other secondary metabolites	ko00940//Phenylpropanoid biosynthesis	K12355	-	GO:0003842//1-pyrroline-5-carboxylate dehydrogenase activity;GO:0004350//glutamate-5-semialdehyde dehydrogenase activity;GO:0004491//methylmalonate-semialdehyde dehydrogenase (acylating) activity;GO:0004777//succinate-semialdehyde dehydrogenase (NAD+) activity;GO:0008802//betaine-aldehyde dehydrogenase activity;GO:0009013//succinate-semialdehyde dehydrogenase [NAD(P)+] activity;GO:0016491//oxidor…	GO:0006527//arginine catabolic process;GO:0006561//proline biosynthetic process;GO:0006562//proline catabolic process;GO:0006574//valine catabolic process;GO:0006578//amino-acid betaine biosynthetic process;GO:0009450//gamma-aminobutyric acid catabolic process;GO:0010124//phenylacetate catabolic process;GO:0055114//oxidation-reduction process
State 1,2,3,4 -vs- State 1,2,3,5	SK1G00041650	2	8.48285e-33	4.94791e-31	LOG	XP_015621391.1 cytokinin riboside 5'-monophosphate phosphoribohydrolase LOG [Oryza sativa Japonica Group]	-	-	-	-	-	-	-
State 1,2,3,4 -vs- State 1,2,3,5	SK1G00041679	5	1.09743e-10	2.396e-09	GPC1	XP_015615982.1 uncharacterized membrane protein C776.05 isoform X1 [Oryza sativa Japonica Group]	-	-	-	-	-	-	-
State 1,2,3,4 -vs- State 1,2,3,5	SK1G00041691	3	2.443e-08	4.3718e-07	--	KAB8082007.1 hypothetical protein EE612_003725 [Oryza sativa]	-	-	-	-	-	GO:0016788//hydrolase activity, acting on ester bonds	-
State 1,2,3,4 -vs- State 1,2,3,5	SK1G00041695	2	1.02612e-18	3.59467e-17	--	EEE54869.1 hypothetical protein OsJ_02359 [Oryza sativa Japonica Group]	-	-	-	-	-	GO:0005524//ATP binding;GO:0043531//ADP binding	-
State 1,2,3,4 -vs- State 1,2,3,5	SK1G00041733	2	4.60188e-09	8.7886e-08	SCD1	XP_015621216.1 DENN domain and WD repeat-containing protein SCD1 [Oryza sativa Japonica Group]	-	-	-	-	-	GO:0005515//protein binding	-
State 1,2,3,4 -vs- State 1,2,3,5	SK1G00041737	1	1.06812e-10	2.33487e-09	RHD3	XP_015617808.1 protein ROOT HAIR DEFECTIVE 3 [Oryza sativa Japonica Group]	-	-	-	-	GO:0016020//membrane	GO:0000309//nicotinamide-nucleotide adenylyltransferase activity;GO:0003924//GTPase activity;GO:0005524//ATP binding;GO:0005525//GTP binding;GO:0008237//metallopeptidase activity;GO:0008241//peptidyl-dipeptidase activity;GO:0018835//carbon phosphorus lyase activity;GO:0019843//rRNA binding;GO:0043022//ribosome binding	GO:0006508//proteolysis;GO:0009435//NAD biosynthetic process;GO:0019634//organic phosphonate metabolic process;GO:0042254//ribosome biogenesis
State 1,2,3,4 -vs- State 1,2,3,5	SK1G00041761	5	1.81001e-08	3.28539e-07	--	EAY74613.1 hypothetical protein OsI_02501 [Oryza sativa Indica Group]	-	-	-	-	-	-	-
State 1,2,3,4 -vs- State 1,2,3,5	SK1G00041763	4	2.44231e-13	6.44545e-12	IQM1	XP_015622418.1 IQ domain-containing protein IQM1 isoform X2 [Oryza sativa Japonica Group]	-	-	-	-	-	GO:0005515//protein binding	-
State 1,2,3,4 -vs- State 1,2,3,5	SK1G00041782	3	1.47992e-20	5.5866e-19	CCD8A	EEC70915.1 hypothetical protein OsI_02474 [Oryza sativa Indica Group]	Metabolism;Metabolism	Global and overview maps;Metabolism of terpenoids and polyketides	ko01110//Biosynthesis of secondary metabolites;ko00906//Carotenoid biosynthesis	K17913;K17913	-	GO:0016702//oxidoreductase activity, acting on single donors with incorporation of molecular oxygen, incorporation of two atoms of oxygen	GO:0055114//oxidation-reduction process
State 1,2,3,4 -vs- State 1,2,3,5	SK1G00041802	2	4.37768e-183	2.72814e-180	CYP76M7	XP_015628496.1 ent-cassadiene C11-alpha-hydroxylase 1-like [Oryza sativa Japonica Group]	Metabolism;Metabolism	Global and overview maps;Metabolism of terpenoids and polyketides	ko01110//Biosynthesis of secondary metabolites;ko00904//Diterpenoid biosynthesis	K16084;K16084	-	GO:0005506//iron ion binding;GO:0016705//oxidoreductase activity, acting on paired donors, with incorporation or reduction of molecular oxygen;GO:0020037//heme binding	GO:0009405//pathogenesis;GO:0055114//oxidation-reduction process
State 1,2,3,4 -vs- State 1,2,3,5	SK1G00041808	1	6.17854e-11	1.38557e-09	At4g32940	XP_015619322.1 vacuolar-processing enzyme [Oryza sativa Japonica Group]	-	-	-	-	-	GO:0008233//peptidase activity	GO:0006508//proteolysis
State 1,2,3,4 -vs- State 1,2,3,5	SK1G00041813	3	5.31322e-23	2.22304e-21	At5g27470	XP_015622439.1 serine--tRNA ligase [Oryza sativa Japonica Group]	Genetic Information Processing	Translation	ko00970//Aminoacyl-tRNA biosynthesis	K01875	GO:0005737//cytoplasm;GO:0039679//viral occlusion body	GO:0000166//nucleotide binding;GO:0003677//DNA binding;GO:0004812//aminoacyl-tRNA ligase activity;GO:0004828//serine-tRNA ligase activity;GO:0004829//threonine-tRNA ligase activity;GO:0005524//ATP binding;GO:0042623//ATPase activity, coupled;GO:0051082//unfolded protein binding	GO:0006260//DNA replication;GO:0006418//tRNA aminoacylation for protein translation;GO:0006434//seryl-tRNA aminoacylation;GO:0006435//threonyl-tRNA aminoacylation;GO:0006457//protein folding;GO:0007059//chromosome segregation;GO:0030261//chromosome condensation
State 1,2,3,4 -vs- State 1,2,3,5	SK1G00041822	4	3.74205e-13	9.71675e-12	GSTU6	XP_015619514.1 probable glutathione S-transferase GSTU6 [Oryza sativa Japonica Group]	Metabolism;Metabolism	Global and overview maps;Metabolism of other amino acids	ko01100//Metabolic pathways;ko00480//Glutathione metabolism	K00799;K00799	-	GO:0005515//protein binding;GO:0015035//protein disulfide oxidoreductase activity;GO:0016034//maleylacetoacetate isomerase activity	GO:0006559//L-phenylalanine catabolic process;GO:0006572//tyrosine catabolic process;GO:0006749//glutathione metabolic process;GO:0006790//sulfur compound metabolic process;GO:0042965//glutaredoxin biosynthetic process;GO:0045454//cell redox homeostasis;GO:0055114//oxidation-reduction process
State 1,2,3,4 -vs- State 1,2,3,5	SK1G00041848	1	1.03131e-22	4.24992e-21	--	XP_015626165.1 uncharacterized protein LOC4325843 [Oryza sativa Japonica Group]	-	-	-	-	-	-	-
State 1,2,3,4 -vs- State 1,2,3,5	SK1G00041852	1	3.688e-47	3.3591e-45	--	XP_015614381.1 B2 protein [Oryza sativa Japonica Group]	-	-	-	-	-	-	-
State 1,2,3,4 -vs- State 1,2,3,5	SK1G00041855	5	3.47582e-11	7.96569e-10	AIP2	XP_015621815.1 DEAD-box ATP-dependent RNA helicase 15 isoform X1 [Oryza sativa Japonica Group]	Genetic Information Processing;Genetic Information Processing;Genetic Information Processing	Transcription;Translation;Translation	ko03040//Spliceosome;ko03013//RNA transport;ko03015//mRNA surveillance pathway	K12812;K12812;K12812	GO:0009380//excinuclease repair complex	GO:0003676//nucleic acid binding;GO:0003677//DNA binding;GO:0003690//double-stranded DNA binding;GO:0004003//ATP-dependent DNA helicase activity;GO:0004386//helicase activity;GO:0005515//protein binding;GO:0005524//ATP binding;GO:0008026//ATP-dependent helicase activity;GO:0009381//excinuclease ABC activity;GO:0016787//hydrolase activity;GO:0016887//ATPase activity	GO:0006139//nucleobase-containing compound metabolic process;GO:0006268//DNA unwinding involved in DNA replication;GO:0006281//DNA repair;GO:0006289//nucleotide-excision repair;GO:0006310//DNA recombination;GO:0043571//maintenance of CRISPR repeat elements
State 1,2,3,4 -vs- State 1,2,3,5	SK1G00041857	3	3.34649e-09	6.50296e-08	AIP1	BAF05211.1 Os01g0549700, partial [Oryza sativa Japonica Group]	Genetic Information Processing;Genetic Information Processing;Genetic Information Processing	Transcription;Translation;Translation	ko03040//Spliceosome;ko03013//RNA transport;ko03015//mRNA surveillance pathway	K12812;K12812;K12812	GO:0009380//excinuclease repair complex;GO:0022625//cytosolic large ribosomal subunit	GO:0003676//nucleic acid binding;GO:0003677//DNA binding;GO:0003690//double-stranded DNA binding;GO:0003735//structural constituent of ribosome;GO:0004003//ATP-dependent DNA helicase activity;GO:0004386//helicase activity;GO:0005515//protein binding;GO:0005524//ATP binding;GO:0008026//ATP-dependent helicase activity;GO:0009381//excinuclease ABC activity;GO:0016787//hydrolase activity;GO:0016887//…	GO:0006139//nucleobase-containing compound metabolic process;GO:0006268//DNA unwinding involved in DNA replication;GO:0006281//DNA repair;GO:0006289//nucleotide-excision repair;GO:0006310//DNA recombination;GO:0006412//translation;GO:0043571//maintenance of CRISPR repeat elements
State 1,2,3,4 -vs- State 1,2,3,5	SK1G00041879	3	7.10829e-21	2.73862e-19	LAT56	XP_015618887.1 putative pectate lyase 21 [Oryza sativa Japonica Group]	Metabolism;Metabolism	Global and overview maps;Carbohydrate metabolism	ko01100//Metabolic pathways;ko00040//Pentose and glucuronate interconversions	K01728;K01728	-	-	-
State 1,2,3,4 -vs- State 1,2,3,5	SK1G00041908	1	1.48207e-14	4.2286e-13	SWEET2A	XP_015615030.1 bidirectional sugar transporter SWEET2a [Oryza sativa Japonica Group]	-	-	-	-	GO:0016021//integral component of membrane	-	-
State 1,2,3,4 -vs- State 1,2,3,5	SK1G00041924	1	1.9415e-30	1.04178e-28	CSC1	XP_015616435.1 calcium permeable stress-gated cation channel 1 [Oryza sativa Japonica Group]	-	-	-	-	GO:0016020//membrane	-	-
State 1,2,3,4 -vs- State 1,2,3,5	SK1G00041955	2	5.84069e-13	1.49908e-11	KCS5	XP_015642682.1 3-ketoacyl-CoA synthase 5 [Oryza sativa Japonica Group]	Metabolism;Metabolism;Organismal Systems;Metabolism	Global and overview maps;Global and overview maps;Environmental adaptation;Lipid metabolism	ko01100//Metabolic pathways;ko01110//Biosynthesis of secondary metabolites;ko04626//Plant-pathogen interaction;ko00062//Fatty acid elongation	K15397;K15397;K15397;K15397	GO:0016020//membrane	GO:0004315//3-oxoacyl-[acyl-carrier-protein] synthase activity;GO:0016747//transferase activity, transferring acyl groups other than amino-acyl groups	GO:0006633//fatty acid biosynthetic process
State 1,2,3,4 -vs- State 1,2,3,5	SK1G00042028	5	6.79219e-09	1.27996e-07	At2g44860	XP_015622111.1 probable ribosome biogenesis protein RLP24 [Oryza sativa Japonica Group]	Genetic Information Processing	Translation	ko03010//Ribosome	K02896	-	GO:0008201//heparin binding;GO:0008270//zinc ion binding	-
State 1,2,3,4 -vs- State 1,2,3,5	SK1G00042030	5	1.0236e-10	2.24863e-09	Os01g0513800	XP_015623130.1 ribosome production factor 2 homolog [Oryza sativa Japonica Group]	-	-	-	-	-	GO:0019843//rRNA binding	GO:0006364//rRNA processing
State 1,2,3,4 -vs- State 1,2,3,5	SK1G00042049	1	3.56683e-09	6.89717e-08	At3g01520	XP_015620990.1 universal stress protein A-like protein [Oryza sativa Japonica Group]	-	-	-	-	-	-	-
State 1,2,3,4 -vs- State 1,2,3,5	SK1G00042058	5	6.79646e-09	1.28008e-07	--	XP_015634905.1 uncharacterized protein LOC4324024 [Oryza sativa Japonica Group]	-	-	-	-	-	-	-
State 1,2,3,4 -vs- State 1,2,3,5	SK1G00042059	5	2.79469e-12	6.8606e-11	MKK1	ABG45894.1 mitogen-activated protein kinase kinase 6 [Oryza sativa Indica Group]	Organismal Systems	Environmental adaptation	ko04626//Plant-pathogen interaction	K04368	-	GO:0004672//protein kinase activity;GO:0005524//ATP binding;GO:0016709//oxidoreductase activity, acting on paired donors, with incorporation or reduction of molecular oxygen, NAD(P)H as one donor, and incorporation of one atom of oxygen	GO:0006468//protein phosphorylation;GO:0006744//ubiquinone biosynthetic process
State 1,2,3,4 -vs- State 1,2,3,5	SK1G00042084	4	6.89882e-27	3.2894e-25	Os01g0505400	EEC70723.1 hypothetical protein OsI_02106 [Oryza sativa Indica Group]	Cellular Processes	Transport and catabolism	ko04146//Peroxisome	K12261	GO:0005948//acetolactate synthase complex	GO:0000287//magnesium ion binding;GO:0003824//catalytic activity;GO:0003984//acetolactate synthase activity;GO:0008949//oxalyl-CoA decarboxylase activity;GO:0009028//tartronate-semialdehyde synthase activity;GO:0016823//hydrolase activity, acting on acid carbon-carbon bonds, in ketonic substances;GO:0018492//carbon-monoxide dehydrogenase (acceptor) activity;GO:0030976//thiamine pyrophosphate bind…	GO:0006085//acetyl-CoA biosynthetic process;GO:0006113//fermentation;GO:0009097//isoleucine biosynthetic process;GO:0009099//valine biosynthetic process;GO:0009234//menaquinone biosynthetic process;GO:0009444//pyruvate oxidation;GO:0009636//response to toxic substance;GO:0009684//indoleacetic acid biosynthetic process;GO:0017000//antibiotic biosynthetic process;GO:0019310//inositol catabolic proc…
State 1,2,3,4 -vs- State 1,2,3,5	SK1G00042098	5	5.1275e-08	8.87618e-07	MUCI21	XP_015630503.1 uncharacterized protein LOC4324540 [Oryza sativa Japonica Group]	-	-	-	-	-	-	-
State 1,2,3,4 -vs- State 1,2,3,5	SK1G00042109	3	1.96888e-57	2.36279e-55	PSBO	EEC70714.1 hypothetical protein OsI_02088 [Oryza sativa Indica Group]	Metabolism	Energy metabolism	ko00195//Photosynthesis	K02716	GO:0009654//photosystem II oxygen evolving complex	GO:0010242//oxygen evolving activity	GO:0010207//photosystem II assembly;GO:0042549//photosystem II stabilization
State 1,2,3,4 -vs- State 1,2,3,5	SK1G00042117	2	4.57651e-15	1.3347e-13	OsI_002060	XP_015629887.1 probable histone H2A.5 [Oryza sativa Japonica Group]	-	-	-	-	-	GO:0003677//DNA binding;GO:0005096//GTPase activator activity	-
State 1,2,3,4 -vs- State 1,2,3,5	SK1G00042176	5	1.8272e-09	3.63415e-08	--	XP_015623833.1 uncharacterized protein LOC4325431 [Oryza sativa Japonica Group]	-	-	-	-	-	-	-
State 1,2,3,4 -vs- State 1,2,3,5	SK1G00042214	4	3.51118e-09	6.80406e-08	Os01g0377700	XP_015621888.1 NPL4-like protein [Oryza sativa Japonica Group]	Genetic Information Processing	Folding, sorting and degradation	ko04141//Protein processing in endoplasmic reticulum	K14015	-	-	-
State 1,2,3,4 -vs- State 1,2,3,5	SK1G00042228	5	8.47126e-09	1.5846e-07	NSN1	EAY74105.1 hypothetical protein OsI_01991 [Oryza sativa Indica Group]	Genetic Information Processing	Translation	ko03008//Ribosome biogenesis in eukaryotes	K14538	GO:0005737//cytoplasm	GO:0003924//GTPase activity;GO:0005525//GTP binding;GO:0015639//ferrous iron uptake transmembrane transporter activity;GO:0019843//rRNA binding;GO:0043022//ribosome binding;GO:0051539//4 iron, 4 sulfur cluster binding	GO:0006400//tRNA modification;GO:0008150//biological_process;GO:0015684//ferrous iron transport;GO:0042254//ribosome biogenesis;GO:0051186//cofactor metabolic process
State 1,2,3,4 -vs- State 1,2,3,5	SK1G00042241	5	8.42249e-18	2.83586e-16	SYNC1	EAY74086.1 hypothetical protein OsI_01974 [Oryza sativa Indica Group]	Genetic Information Processing	Translation	ko00970//Aminoacyl-tRNA biosynthesis	K01893	GO:0005737//cytoplasm	GO:0000049//tRNA binding;GO:0000166//nucleotide binding;GO:0003676//nucleic acid binding;GO:0004812//aminoacyl-tRNA ligase activity;GO:0004815//aspartate-tRNA ligase activity;GO:0004816//asparagine-tRNA ligase activity;GO:0004824//lysine-tRNA ligase activity;GO:0005524//ATP binding;GO:0043767//pyrrolysyl-tRNA synthetase activity;GO:0050560//aspartate-tRNA(Asn) ligase activity	GO:0006418//tRNA aminoacylation for protein translation;GO:0006421//asparaginyl-tRNA aminoacylation;GO:0006422//aspartyl-tRNA aminoacylation;GO:0006430//lysyl-tRNA aminoacylation;GO:0043039//tRNA aminoacylation
State 1,2,3,4 -vs- State 1,2,3,5	SK1G00042249	4	6.25862e-18	2.11129e-16	OPR10	EAY74071.1 hypothetical protein OsI_01959 [Oryza sativa Indica Group]	Metabolism;Metabolism;Metabolism	Global and overview maps;Global and overview maps;Lipid metabolism	ko01100//Metabolic pathways;ko01110//Biosynthesis of secondary metabolites;ko00592//alpha-Linolenic acid metabolism	K05894;K05894;K05894	-	GO:0010181//FMN binding;GO:0016491//oxidoreductase activity	GO:0055114//oxidation-reduction process
State 1,2,3,4 -vs- State 1,2,3,5	SK1G00042250	4	4.0946e-132	1.58096e-129	GST4	XP_015622486.1 glutathione S-transferase 4 [Oryza sativa Japonica Group]	Metabolism;Metabolism	Global and overview maps;Metabolism of other amino acids	ko01100//Metabolic pathways;ko00480//Glutathione metabolism	K00799;K00799	-	GO:0005515//protein binding;GO:0016034//maleylacetoacetate isomerase activity	GO:0006559//L-phenylalanine catabolic process;GO:0006572//tyrosine catabolic process;GO:0006749//glutathione metabolic process
State 1,2,3,4 -vs- State 1,2,3,5	SK1G00042254	1	3.01684e-08	5.35018e-07	CUL1	XP_015619069.1 cullin-1 [Oryza sativa Japonica Group]	Genetic Information Processing;Genetic Information Processing	Folding, sorting and degradation;Folding, sorting and degradation	ko04141//Protein processing in endoplasmic reticulum;ko04120//Ubiquitin mediated proteolysis	K03347;K03347	-	GO:0031625//ubiquitin protein ligase binding	GO:0006511//ubiquitin-dependent protein catabolic process
State 1,2,3,4 -vs- State 1,2,3,5	SK1G00042314	5	3.30457e-85	7.07139e-83	RPS4	XP_015622456.1 40S ribosomal protein S4-like [Oryza sativa Japonica Group]	Genetic Information Processing	Translation	ko03010//Ribosome	K02987	-	GO:0003723//RNA binding	-
State 1,2,3,4 -vs- State 1,2,3,5	SK1G00042321	4	3.55886e-08	6.27695e-07	Os01g0357100	EEC70619.1 hypothetical protein OsI_01871 [Oryza sativa Indica Group]	Metabolism;Metabolism	Global and overview maps;Energy metabolism	ko01100//Metabolic pathways;ko00910//Nitrogen metabolism	K00366;K00366	-	GO:0004783//sulfite reductase (NADPH) activity;GO:0016002//sulfite reductase activity;GO:0016491//oxidoreductase activity;GO:0016709//oxidoreductase activity, acting on paired donors, with incorporation or reduction of molecular oxygen, NAD(P)H as one donor, and incorporation of one atom of oxygen;GO:0018551//hydrogensulfite reductase activity;GO:0020037//heme binding;GO:0050311//sulfite reductas…	GO:0000103//sulfate assimilation;GO:0006790//sulfur compound metabolic process;GO:0019250//aerobic cobalamin biosynthetic process;GO:0019420//dissimilatory sulfate reduction;GO:0055114//oxidation-reduction process
State 1,2,3,4 -vs- State 1,2,3,5	SK1G00042345	2	3.73953e-20	1.38949e-18	GST4	EEC70603.1 hypothetical protein OsI_01840 [Oryza sativa Indica Group]	Metabolism;Metabolism	Global and overview maps;Metabolism of other amino acids	ko01100//Metabolic pathways;ko00480//Glutathione metabolism	K00799;K00799	-	GO:0005515//protein binding;GO:0016034//maleylacetoacetate isomerase activity	GO:0006559//L-phenylalanine catabolic process;GO:0006572//tyrosine catabolic process;GO:0006749//glutathione metabolic process
State 1,2,3,4 -vs- State 1,2,3,5	SK1G00042367	1	0	0	SALT	A2WPN7.2 RecName: Full=Salt stress-induced protein; Short=Salt protein; AltName: Full=Protein lectin-like; AltName: Full=Protein mannose-binding lectin [Oryza sativa Indica Group]	-	-	-	-	-	-	-
State 1,2,3,4 -vs- State 1,2,3,5	SK1G00042369	5	2.50497e-25	1.14519e-23	RPL23A	XP_015622490.1 60S ribosomal protein L23A [Oryza sativa Japonica Group]	Genetic Information Processing	Translation	ko03010//Ribosome	K02893	GO:0005840//ribosome;GO:0022625//cytosolic large ribosomal subunit	GO:0003735//structural constituent of ribosome	GO:0006412//translation
State 1,2,3,4 -vs- State 1,2,3,5	SK1G00042427	5	3.2626e-11	7.49155e-10	PDIL2-2	XP_015622515.1 protein disulfide isomerase-like 2-2 [Oryza sativa Japonica Group]	Genetic Information Processing	Folding, sorting and degradation	ko04141//Protein processing in endoplasmic reticulum	K09584	GO:0005576//extracellular region;GO:0005737//cytoplasm;GO:0005783//endoplasmic reticulum	GO:0003756//protein disulfide isomerase activity;GO:0005134//interleukin-2 receptor binding;GO:0008083//growth factor activity;GO:0015036//disulfide oxidoreductase activity;GO:0016209//antioxidant activity;GO:0016491//oxidoreductase activity;GO:0016667//oxidoreductase activity, acting on a sulfur group of donors	GO:0006457//protein folding;GO:0006790//sulfur compound metabolic process;GO:0006955//immune response;GO:0055114//oxidation-reduction process
State 1,2,3,4 -vs- State 1,2,3,5	SK1G00042442	2	1.0479e-41	7.97078e-40	AVP1	EAY73863.1 hypothetical protein OsI_01741 [Oryza sativa Indica Group]	-	-	-	-	GO:0005887//integral component of plasma membrane;GO:0016020//membrane	GO:0004427//inorganic diphosphatase activity;GO:0009678//hydrogen-translocating pyrophosphatase activity	GO:0015992//proton transport;GO:1902600//hydrogen ion transmembrane transport
State 1,2,3,4 -vs- State 1,2,3,5	SK1G00042454	4	3.2389e-16	9.99584e-15	--	-	-	-	-	-	-	-	-
State 1,2,3,4 -vs- State 1,2,3,5	SK1G00042458	2	1.07658e-14	3.09905e-13	NIN1	EAY73839.1 hypothetical protein OsI_01715 [Oryza sativa Indica Group]	-	-	-	-	-	GO:0033926//glycopeptide alpha-N-acetylgalactosaminidase activity	-
State 1,2,3,4 -vs- State 1,2,3,5	SK1G00042477	5	6.32322e-12	1.51766e-10	RPS27AA	XP_006644130.1 PREDICTED: ubiquitin-40S ribosomal protein S27a-1 [Oryza brachyantha]	Genetic Information Processing	Translation	ko03010//Ribosome	K02977	GO:0005840//ribosome	GO:0003735//structural constituent of ribosome;GO:0005515//protein binding	GO:0006289//nucleotide-excision repair;GO:0006412//translation
State 1,2,3,4 -vs- State 1,2,3,5	SK1G00042482	2	0	0	PER1	XP_015621829.1 peroxidase 1 [Oryza sativa Japonica Group]	Metabolism;Metabolism;Metabolism	Global and overview maps;Global and overview maps;Biosynthesis of other secondary metabolites	ko01100//Metabolic pathways;ko01110//Biosynthesis of secondary metabolites;ko00940//Phenylpropanoid biosynthesis	K00430;K00430;K00430	-	GO:0004601//peroxidase activity;GO:0020037//heme binding	GO:0006979//response to oxidative stress;GO:0055114//oxidation-reduction process
State 1,2,3,4 -vs- State 1,2,3,5	SK1G00042483	2	1.83992e-162	9.4721e-160	PER1	EEC70541.1 hypothetical protein OsI_01679 [Oryza sativa Indica Group]	Metabolism;Metabolism;Metabolism	Global and overview maps;Global and overview maps;Biosynthesis of other secondary metabolites	ko01100//Metabolic pathways;ko01110//Biosynthesis of secondary metabolites;ko00940//Phenylpropanoid biosynthesis	K00430;K00430;K00430	-	GO:0004601//peroxidase activity;GO:0020037//heme binding	GO:0006979//response to oxidative stress;GO:0055114//oxidation-reduction process
State 1,2,3,4 -vs- State 1,2,3,5	SK1G00042487	2	2.47975e-49	2.38069e-47	PER1	XP_015626715.1 peroxidase 1 [Oryza sativa Japonica Group]	Metabolism;Metabolism;Metabolism	Global and overview maps;Global and overview maps;Biosynthesis of other secondary metabolites	ko01100//Metabolic pathways;ko01110//Biosynthesis of secondary metabolites;ko00940//Phenylpropanoid biosynthesis	K00430;K00430;K00430	-	GO:0004096//catalase activity;GO:0004601//peroxidase activity;GO:0020037//heme binding	GO:0006979//response to oxidative stress;GO:0055114//oxidation-reduction process
State 1,2,3,4 -vs- State 1,2,3,5	SK1G00042498	4	4.61281e-12	1.11847e-10	SAM2	XP_015613529.1 S-adenosylmethionine synthase 2 [Oryza sativa Japonica Group]	Metabolism;Metabolism;Metabolism;Metabolism	Global and overview maps;Global and overview maps;Global and overview maps;Amino acid metabolism	ko01100//Metabolic pathways;ko01110//Biosynthesis of secondary metabolites;ko01230//Biosynthesis of amino acids;ko00270//Cysteine and methionine metabolism	K00789;K00789;K00789;K00789	-	GO:0004478//methionine adenosyltransferase activity	GO:0006556//S-adenosylmethionine biosynthetic process;GO:0007155//cell adhesion
State 1,2,3,4 -vs- State 1,2,3,5	SK1G00042543	5	1.07733e-19	3.96157e-18	ERF071	EAY73721.1 hypothetical protein OsI_01597 [Oryza sativa Indica Group]	-	-	-	-	-	GO:0003700//transcription factor activity, sequence-specific DNA binding	GO:0006355//regulation of transcription, DNA-templated
State 1,2,3,4 -vs- State 1,2,3,5	SK1G00042547	4	7.47964e-20	2.76474e-18	PME41	XP_015625464.1 probable pectinesterase/pectinesterase inhibitor 41 [Oryza sativa Japonica Group]	Metabolism;Metabolism	Global and overview maps;Carbohydrate metabolism	ko01100//Metabolic pathways;ko00040//Pentose and glucuronate interconversions	K01051;K01051	-	GO:0004857//enzyme inhibitor activity;GO:0030599//pectinesterase activity	GO:0042545//cell wall modification
State 1,2,3,4 -vs- State 1,2,3,5	SK1G00042561	5	8.46372e-37	5.61959e-35	--	-	-	-	-	-	-	-	-
State 1,2,3,4 -vs- State 1,2,3,5	SK1G00042563	2	1.54954e-13	4.14479e-12	--	XP_015644236.1 uncharacterized protein LOC4327759 [Oryza sativa Japonica Group]	-	-	-	-	-	-	-
State 1,2,3,4 -vs- State 1,2,3,5	SK1G00042575	2	4.36578e-39	3.0588e-37	P	XP_015628164.1 myb-related protein P [Oryza sativa Japonica Group]	-	-	-	-	-	-	-
State 1,2,3,4 -vs- State 1,2,3,5	SK1G00042577	4	3.43828e-09	6.66673e-08	--	EEC70494.1 hypothetical protein OsI_01568 [Oryza sativa Indica Group]	-	-	-	-	-	GO:0003824//catalytic activity	-
State 1,2,3,4 -vs- State 1,2,3,5	SK1G00042590	3	3.92826e-56	4.57507e-54	CP12-1	XP_015616280.1 calvin cycle protein CP12-1, chloroplastic [Oryza sativa Japonica Group]	-	-	-	-	-	-	-
State 1,2,3,4 -vs- State 1,2,3,5	SK1G00042634	3	3.15128e-11	7.25468e-10	Os01g0295700	XP_015622472.1 probable protein phosphatase 2C 2 [Oryza sativa Japonica Group]	-	-	-	-	-	GO:0016791//phosphatase activity	-
State 1,2,3,4 -vs- State 1,2,3,5	SK1G00042646	2	3.25687e-96	8.69853e-94	METK3	XP_015614349.1 S-adenosylmethionine synthase 3 [Oryza sativa Japonica Group]	Metabolism;Metabolism;Metabolism;Metabolism	Global and overview maps;Global and overview maps;Global and overview maps;Amino acid metabolism	ko01100//Metabolic pathways;ko01110//Biosynthesis of secondary metabolites;ko01230//Biosynthesis of amino acids;ko00270//Cysteine and methionine metabolism	K00789;K00789;K00789;K00789	-	GO:0004478//methionine adenosyltransferase activity	GO:0006556//S-adenosylmethionine biosynthetic process;GO:0007155//cell adhesion
State 1,2,3,4 -vs- State 1,2,3,5	SK1G00042654	2	5.12525e-47	4.62079e-45	ABCB21	XP_015612048.1 ABC transporter B family member 21 [Oryza sativa Japonica Group]	Environmental Information Processing	Membrane transport	ko02010//ABC transporters	K05658	GO:0005575//cellular_component;GO:0005737//cytoplasm;GO:0005887//integral component of plasma membrane;GO:0009380//excinuclease repair complex;GO:0009898//cytoplasmic side of plasma membrane;GO:0016021//integral component of membrane;GO:0043190//ATP-binding cassette (ABC) transporter complex;GO:0055051//ATP-binding cassette (ABC) transporter complex, integrated substrate binding;GO:0055052//ATP-b…	GO:0003674//molecular_function;GO:0003676//nucleic acid binding;GO:0003924//GTPase activity;GO:0004020//adenylylsulfate kinase activity;GO:0004140//dephospho-CoA kinase activity;GO:0005260//channel-conductance-controlling ATPase activity;GO:0005319//lipid transporter activity;GO:0005524//ATP binding;GO:0005525//GTP binding;GO:0008565//protein transporter activity;GO:0009381//excinuclease ABC acti…	GO:0000910//cytokinesis;GO:0006289//nucleotide-excision repair;GO:0006412//translation;GO:0006614//SRP-dependent cotranslational protein targeting to membrane;GO:0006790//sulfur compound metabolic process;GO:0006810//transport;GO:0006817//phosphate ion transport;GO:0006824//cobalt ion transport;GO:0006855//drug transmembrane transport;GO:0006869//lipid transport;GO:0007186//G-protein coupled rece…
State 1,2,3,4 -vs- State 1,2,3,5	SK1G00042709	4	1.17611e-27	5.79444e-26	EIF6-2	XP_015635348.1 eukaryotic translation initiation factor 6-2 isoform X2 [Oryza sativa Japonica Group]	Genetic Information Processing	Translation	ko03008//Ribosome biogenesis in eukaryotes	K03264	-	GO:0043022//ribosome binding	GO:0042256//mature ribosome assembly
State 1,2,3,4 -vs- State 1,2,3,5	SK1G00042715	3	3.17955e-16	9.82122e-15	PHT4;1	XP_015648040.1 probable anion transporter 1, chloroplastic [Oryza sativa Japonica Group]	-	-	-	-	GO:0005887//integral component of plasma membrane	GO:0008028//monocarboxylic acid transmembrane transporter activity;GO:0015114//phosphate ion transmembrane transporter activity;GO:0015238//drug transmembrane transporter activity;GO:0015307//drug:proton antiporter activity;GO:0015535//fucose:proton symporter activity;GO:0022857//transmembrane transporter activity;GO:0042910//xenobiotic transporter activity	GO:0006817//phosphate ion transport;GO:0006855//drug transmembrane transport;GO:0015718//monocarboxylic acid transport;GO:0015756//fucose transport;GO:0015893//drug transport;GO:0042493//response to drug;GO:0042908//xenobiotic transport;GO:0055085//transmembrane transport
State 1,2,3,4 -vs- State 1,2,3,5	SK1G00042720	3	7.60388e-16	2.29486e-14	CRD1	XP_015622109.1 magnesium-protoporphyrin IX monomethyl ester [oxidative] cyclase, chloroplastic [Oryza sativa Japonica Group]	Metabolism;Metabolism;Metabolism	Global and overview maps;Global and overview maps;Metabolism of cofactors and vitamins	ko01100//Metabolic pathways;ko01110//Biosynthesis of secondary metabolites;ko00860//Porphyrin and chlorophyll metabolism	K04035;K04035;K04035	-	GO:0003677//DNA binding;GO:0003899//DNA-directed RNA polymerase activity;GO:0016491//oxidoreductase activity;GO:0045300//acyl-[acyl-carrier-protein] desaturase activity;GO:0046872//metal ion binding;GO:0048529//magnesium-protoporphyrin IX monomethyl ester (oxidative) cyclase activity	GO:0006351//transcription, DNA-templated;GO:0006631//fatty acid metabolic process;GO:0015995//chlorophyll biosynthetic process;GO:0055114//oxidation-reduction process
State 1,2,3,4 -vs- State 1,2,3,5	SK1G00042722	3	4.94012e-14	1.36563e-12	CRSP	EAY73513.1 hypothetical protein OsI_01395 [Oryza sativa Indica Group]	-	-	-	-	-	GO:0008236//serine-type peptidase activity	GO:0006508//proteolysis;GO:0009306//protein secretion
State 1,2,3,4 -vs- State 1,2,3,5	SK1G00042746	5	2.72022e-27	1.31287e-25	RPL30	XP_015622112.1 60S ribosomal protein L30 [Oryza sativa Japonica Group]	Genetic Information Processing	Translation	ko03010//Ribosome	K02908	-	-	-
State 1,2,3,4 -vs- State 1,2,3,5	SK1G00042777	5	1.21413e-13	3.27473e-12	PER24	XP_015622358.1 peroxidase 24 [Oryza sativa Japonica Group]	Metabolism;Metabolism;Metabolism	Global and overview maps;Global and overview maps;Biosynthesis of other secondary metabolites	ko01100//Metabolic pathways;ko01110//Biosynthesis of secondary metabolites;ko00940//Phenylpropanoid biosynthesis	K00430;K00430;K00430	-	GO:0004601//peroxidase activity;GO:0020037//heme binding	GO:0006979//response to oxidative stress;GO:0055114//oxidation-reduction process
State 1,2,3,4 -vs- State 1,2,3,5	SK1G00042794	5	8.71621e-14	2.37254e-12	CAM2	EEE54295.1 hypothetical protein OsJ_01227 [Oryza sativa Japonica Group]	Organismal Systems;Environmental Information Processing;Environmental Information Processing	Environmental adaptation;Signal transduction;Signal transduction	ko04626//Plant-pathogen interaction;ko04016//MAPK signaling pathway - plant;ko04070//Phosphatidylinositol signaling system	K02183;K02183;K02183	GO:0016020//membrane;GO:0030880//RNA polymerase complex	GO:0004553//hydrolase activity, hydrolyzing O-glycosyl compounds;GO:0005509//calcium ion binding;GO:0005515//protein binding;GO:0015159//polysaccharide transmembrane transporter activity	GO:0000272//polysaccharide catabolic process;GO:0006352//DNA-templated transcription, initiation;GO:0015774//polysaccharide transport
State 1,2,3,4 -vs- State 1,2,3,5	SK1G00042803	4	2.23725e-29	1.16698e-27	PRXIIF	EAZ11353.1 hypothetical protein OsJ_01220 [Oryza sativa Japonica Group]	-	-	-	-	-	GO:0003824//catalytic activity;GO:0016209//antioxidant activity;GO:0016491//oxidoreductase activity	GO:0009058//biosynthetic process;GO:0055114//oxidation-reduction process
State 1,2,3,4 -vs- State 1,2,3,5	SK1G00042815	5	2.08579e-08	3.76098e-07	ARF	OQU86657.1 hypothetical protein SORBI_3003G122200 [Sorghum bicolor]	Cellular Processes	Transport and catabolism	ko04144//Endocytosis	K07937	GO:0048501//signal recognition particle, plasma membrane targeting	GO:0003873//6-phosphofructo-2-kinase activity;GO:0003924//GTPase activity;GO:0005048//signal sequence binding;GO:0005524//ATP binding;GO:0005525//GTP binding;GO:0019001//guanyl nucleotide binding;GO:0031683//G-protein beta/gamma-subunit complex binding	GO:0006000//fructose metabolic process;GO:0007186//G-protein coupled receptor signaling pathway;GO:0009306//protein secretion;GO:0042254//ribosome biogenesis
State 1,2,3,4 -vs- State 1,2,3,5	SK1G00042821	2	1.89367e-23	8.06557e-22	--	XP_015634600.1 uncharacterized protein LOC4326202 [Oryza sativa Japonica Group]	-	-	-	-	-	GO:0003674//molecular_function;GO:0004576//oligosaccharyl transferase activity	GO:0006487//protein N-linked glycosylation;GO:0033103//protein secretion by the type VI secretion system
State 1,2,3,4 -vs- State 1,2,3,5	SK1G00042830	5	2.4516e-08	4.38498e-07	PER72	EAY73397.1 hypothetical protein OsI_01277 [Oryza sativa Indica Group]	Metabolism;Metabolism;Metabolism	Global and overview maps;Global and overview maps;Biosynthesis of other secondary metabolites	ko01100//Metabolic pathways;ko01110//Biosynthesis of secondary metabolites;ko00940//Phenylpropanoid biosynthesis	K00430;K00430;K00430	-	GO:0004601//peroxidase activity;GO:0020037//heme binding	GO:0006979//response to oxidative stress;GO:0055114//oxidation-reduction process
State 1,2,3,4 -vs- State 1,2,3,5	SK1G00042835	1	6.58986e-10	1.35623e-08	--	EEC70353.1 hypothetical protein OsI_01272 [Oryza sativa Indica Group]	-	-	-	-	GO:0016021//integral component of membrane	-	-
State 1,2,3,4 -vs- State 1,2,3,5	SK1G00042851	2	3.21006e-08	5.67867e-07	PBL27	XP_015651260.1 probable serine/threonine-protein kinase PBL7 isoform X1 [Oryza sativa Japonica Group]	-	-	-	-	-	GO:0004672//protein kinase activity;GO:0005524//ATP binding	GO:0006468//protein phosphorylation
State 1,2,3,4 -vs- State 1,2,3,5	SK1G00042885	5	4.85182e-08	8.40714e-07	Os01g0253300	XP_015621115.1 importin subunit alpha-1a [Oryza sativa Japonica Group]	-	-	-	-	GO:0000221//vacuolar proton-transporting V-type ATPase, V1 domain;GO:0030117//membrane coat	GO:0005515//protein binding;GO:0061608//nuclear import signal receptor activity	GO:0006606//protein import into nucleus;GO:0006886//intracellular protein transport;GO:0016192//vesicle-mediated transport;GO:1902600//hydrogen ion transmembrane transport
State 1,2,3,4 -vs- State 1,2,3,5	SK1G00042909	5	3.23599e-17	1.05555e-15	--	XP_015622478.1 uncharacterized protein LOC4327220 isoform X2 [Oryza sativa Japonica Group]	-	-	-	-	-	-	-
State 1,2,3,4 -vs- State 1,2,3,5	SK1G00042913	2	8.52771e-28	4.23074e-26	GGPPS1	BAS71331.1 Os01g0248701 [Oryza sativa Japonica Group]	Metabolism;Metabolism;Metabolism	Global and overview maps;Global and overview maps;Metabolism of terpenoids and polyketides	ko01100//Metabolic pathways;ko01110//Biosynthesis of secondary metabolites;ko00900//Terpenoid backbone biosynthesis	K13789;K13789;K13789	-	GO:0000010//trans-hexaprenyltranstransferase activity;GO:0050347//trans-octaprenyltranstransferase activity	GO:0008299//isoprenoid biosynthetic process;GO:0009234//menaquinone biosynthetic process;GO:0010236//plastoquinone biosynthetic process
State 1,2,3,4 -vs- State 1,2,3,5	SK1G00042970	3	7.48246e-93	1.84578e-90	TPT	XP_015619081.1 triose phosphate/phosphate translocator TPT, chloroplastic [Oryza sativa Japonica Group]	-	-	-	-	GO:0016020//membrane;GO:0016021//integral component of membrane	-	-
State 1,2,3,4 -vs- State 1,2,3,5	SK1G00042976	5	1.29693e-18	4.52548e-17	DAAT	XP_015621951.1 D-amino-acid transaminase, chloroplastic isoform X1 [Oryza sativa Japonica Group]	Metabolism	Metabolism of cofactors and vitamins	ko00790//Folate biosynthesis	K18482	-	GO:0003824//catalytic activity;GO:0004084//branched-chain-amino-acid transaminase activity;GO:0008696//4-amino-4-deoxychorismate lyase activity;GO:0047810//D-alanine:2-oxoglutarate aminotransferase activity	GO:0008153//para-aminobenzoic acid biosynthetic process;GO:0009082//branched-chain amino acid biosynthetic process;GO:0009396//folic acid-containing compound biosynthetic process;GO:0019480//L-alanine oxidation to pyruvate via D-alanine
State 1,2,3,4 -vs- State 1,2,3,5	SK1G00043025	5	2.25341e-32	1.30156e-30	RPP3A	XP_015618339.1 60S acidic ribosomal protein P3-like [Oryza sativa Japonica Group]	Genetic Information Processing	Translation	ko03010//Ribosome	K02942	-	GO:0003674//molecular_function	GO:0043571//maintenance of CRISPR repeat elements
State 1,2,3,4 -vs- State 1,2,3,5	SK1G00043045	1	1.32781e-08	2.43754e-07	--	EEC70232.1 hypothetical protein OsI_01002 [Oryza sativa Indica Group]	-	-	-	-	-	-	-
State 1,2,3,4 -vs- State 1,2,3,5	SK1G00043050	4	2.19429e-13	5.8125e-12	At3g47110	BAF04389.2 Os01g0228200 [Oryza sativa Japonica Group]	-	-	-	-	-	GO:0004672//protein kinase activity;GO:0005515//protein binding;GO:0005524//ATP binding;GO:0016709//oxidoreductase activity, acting on paired donors, with incorporation or reduction of molecular oxygen, NAD(P)H as one donor, and incorporation of one atom of oxygen	GO:0006468//protein phosphorylation;GO:0006744//ubiquinone biosynthetic process
State 1,2,3,4 -vs- State 1,2,3,5	SK1G00043106	2	1.00527e-42	7.84815e-41	GH3.12	BAD81367.1 putative Nt-gh3 deduced protein [Oryza sativa Japonica Group]	Environmental Information Processing	Signal transduction	ko04075//Plant hormone signal transduction	K14506	-	-	-
State 1,2,3,4 -vs- State 1,2,3,5	SK1G00043131	2	8.41507e-14	2.29233e-12	DJ1B	XP_015630830.1 protein DJ-1 homolog B [Oryza sativa Japonica Group]	-	-	-	-	-	GO:0003824//catalytic activity;GO:0004852//uroporphyrinogen-III synthase activity;GO:0008234//cysteine-type peptidase activity;GO:0008810//cellulase activity	GO:0005975//carbohydrate metabolic process;GO:0006508//proteolysis;GO:0033014//tetrapyrrole biosynthetic process
State 1,2,3,4 -vs- State 1,2,3,5	SK1G00043146	2	2.0608e-58	2.51559e-56	At5g45910	XP_015648138.1 GDSL esterase/lipase At5g45910 [Oryza sativa Japonica Group]	-	-	-	-	-	GO:0016788//hydrolase activity, acting on ester bonds	-
State 1,2,3,4 -vs- State 1,2,3,5	SK1G00043148	4	1.14003e-87	2.62963e-85	TAX1	XP_015648126.1 uncharacterized protein LOC4325256 [Oryza sativa Japonica Group]	-	-	-	-	-	-	-
State 1,2,3,4 -vs- State 1,2,3,5	SK1G00043158	4	6.04568e-09	1.14292e-07	BHLH41	EEC70105.1 hypothetical protein OsI_00760 [Oryza sativa Indica Group]	-	-	-	-	GO:0005876//spindle microtubule;GO:0042729//DASH complex	GO:0003700//transcription factor activity, sequence-specific DNA binding;GO:0004674//protein serine/threonine kinase activity;GO:0005524//ATP binding;GO:0046983//protein dimerization activity	GO:0006355//regulation of transcription, DNA-templated;GO:0006468//protein phosphorylation;GO:0008608//attachment of spindle microtubules to kinetochore
State 1,2,3,4 -vs- State 1,2,3,5	SK1G00043184	5	2.64044e-15	7.80964e-14	MT3A	A1YTM8.1 RecName: Full=Metallothionein-like protein 3A; AltName: Full=Class I metallothionein-like protein 3A; AltName: Full=OsMT-I-3a; Short=OsMT3; Short=OsMT3a [Oryza sativa Japonica Group]	-	-	-	-	-	GO:0046872//metal ion binding	-
State 1,2,3,4 -vs- State 1,2,3,5	SK1G00043190	2	1.17511e-47	1.07862e-45	HT1	EAY72920.1 hypothetical protein OsI_00793 [Oryza sativa Indica Group]	-	-	-	-	-	GO:0004413//homoserine kinase activity;GO:0004672//protein kinase activity;GO:0005524//ATP binding	GO:0006468//protein phosphorylation;GO:0009088//threonine biosynthetic process
State 1,2,3,4 -vs- State 1,2,3,5	SK1G00043201	4	4.18177e-21	1.62522e-19	BBX22	XP_015630321.1 B-box zinc finger protein 22 [Oryza sativa Japonica Group]	-	-	-	-	-	GO:0008270//zinc ion binding	-
State 1,2,3,4 -vs- State 1,2,3,5	SK1G00043204	2	2.30968e-08	4.13738e-07	BZR2	EEC70129.1 hypothetical protein OsI_00807 [Oryza sativa Indica Group]	-	-	-	-	-	-	-
State 1,2,3,4 -vs- State 1,2,3,5	SK1G00043207	2	1.83326e-21	7.1957e-20	--	XP_025879533.1 protein GRAVITROPIC IN THE LIGHT 1 [Oryza sativa Japonica Group]	-	-	-	-	-	-	-
State 1,2,3,4 -vs- State 1,2,3,5	SK1G00043217	5	2.61185e-22	1.06032e-20	RPL11	XP_002454974.2 60S ribosomal protein L11 [Sorghum bicolor]	Genetic Information Processing	Translation	ko03010//Ribosome	K02868	-	-	-
State 1,2,3,4 -vs- State 1,2,3,5	SK1G00043241	5	9.76809e-09	1.81761e-07	CAT5	XP_015621666.1 cationic amino acid transporter 5 [Oryza sativa Japonica Group]	-	-	-	-	GO:0005887//integral component of plasma membrane;GO:0016020//membrane;GO:0016021//integral component of membrane	GO:0005275//amine transmembrane transporter activity;GO:0015171//amino acid transmembrane transporter activity;GO:0015495//gamma-aminobutyric acid:proton symporter activity;GO:0022857//transmembrane transporter activity	GO:0006810//transport;GO:0006865//amino acid transport;GO:0009450//gamma-aminobutyric acid catabolic process;GO:0009847//spore germination;GO:0015837//amine transport;GO:0055085//transmembrane transport
State 1,2,3,4 -vs- State 1,2,3,5	SK1G00043247	1	7.83423e-60	9.93885e-58	--	KAB8080461.1 hypothetical protein EE612_001000 [Oryza sativa]	-	-	-	-	-	-	-
State 1,2,3,4 -vs- State 1,2,3,5	SK1G00043263	5	3.20536e-11	7.36486e-10	UGT75C1	KAB8080217.1 hypothetical protein EE612_000610 [Oryza sativa]	-	-	-	-	-	GO:0008194//UDP-glycosyltransferase activity;GO:0016758//transferase activity, transferring hexosyl groups	-
State 1,2,3,4 -vs- State 1,2,3,5	SK1G00043264	5	8.44777e-10	1.72659e-08	YPTM2	XP_015622489.1 GTP-binding protein YPTM2 [Oryza sativa Japonica Group]	-	-	-	-	GO:0005737//cytoplasm	GO:0003924//GTPase activity;GO:0005506//iron ion binding;GO:0005524//ATP binding;GO:0005525//GTP binding;GO:0016887//ATPase activity;GO:0018576//catechol 1,2-dioxygenase activity;GO:0043022//ribosome binding	GO:0006400//tRNA modification;GO:0006412//translation;GO:0006576//cellular biogenic amine metabolic process;GO:0008150//biological_process;GO:0009712//catechol-containing compound metabolic process;GO:0042254//ribosome biogenesis;GO:0055114//oxidation-reduction process
State 1,2,3,4 -vs- State 1,2,3,5	SK1G00043282	4	2.64086e-11	6.10594e-10	TKI1	EEE53998.1 hypothetical protein OsJ_00639 [Oryza sativa Japonica Group]	-	-	-	-	-	-	-
State 1,2,3,4 -vs- State 1,2,3,5	SK1G00043296	5	3.85072e-17	1.24804e-15	HSP18.0	Q5VRY1.1 RecName: Full=18.0 kDa class II heat shock protein; AltName: Full=18.0 kDa heat shock protein; Short=OsHsp18.0 [Oryza sativa Japonica Group]	Genetic Information Processing	Folding, sorting and degradation	ko04141//Protein processing in endoplasmic reticulum	K13993	-	-	-
State 1,2,3,4 -vs- State 1,2,3,5	SK1G00043303	4	7.08412e-46	6.19808e-44	AT9	XP_015618385.1 acyl transferase 9 [Oryza sativa Japonica Group]	-	-	-	-	-	GO:0016747//transferase activity, transferring acyl groups other than amino-acyl groups	-
State 1,2,3,4 -vs- State 1,2,3,5	SK1G00043315	4	1.19543e-09	2.41684e-08	--	XP_015621643.1 protein ANTAGONIST OF LIKE HETEROCHROMATIN PROTEIN 1 [Oryza sativa Japonica Group]	-	-	-	-	-	GO:0003779//actin binding;GO:0016788//hydrolase activity, acting on ester bonds	GO:0007010//cytoskeleton organization
State 1,2,3,4 -vs- State 1,2,3,5	SK1G00043321	4	2.22815e-09	4.39958e-08	KUA1	XP_015621787.1 transcription factor MYBS3-like [Oryza sativa Japonica Group]	-	-	-	-	-	-	-
State 1,2,3,4 -vs- State 1,2,3,5	SK1G00043322	3	2.07819e-22	8.46575e-21	hxnY	XP_015617743.1 2-oxoglutarate-Fe(II) type oxidoreductase hxnY isoform X3 [Oryza sativa Japonica Group]	-	-	-	-	-	GO:0016491//oxidoreductase activity	GO:0055114//oxidation-reduction process
State 1,2,3,4 -vs- State 1,2,3,5	SK1G00043334	5	2.45513e-60	3.15983e-58	RPP2A	XP_015622106.1 60S acidic ribosomal protein P2A [Oryza sativa Japonica Group]	Genetic Information Processing	Translation	ko03010//Ribosome	K02943	-	-	GO:0009291//unidirectional conjugation
State 1,2,3,4 -vs- State 1,2,3,5	SK1G00043344	2	1.00057e-49	9.68455e-48	KUA1	KAB8080324.1 hypothetical protein EE612_000779 [Oryza sativa]	-	-	-	-	-	-	-
State 1,2,3,4 -vs- State 1,2,3,5	SK1G00043377	4	7.04923e-12	1.67943e-10	PDC1	EAY72634.1 hypothetical protein OsI_00500 [Oryza sativa Indica Group]	Metabolism;Metabolism;Metabolism	Global and overview maps;Global and overview maps;Carbohydrate metabolism	ko01100//Metabolic pathways;ko01110//Biosynthesis of secondary metabolites;ko00010//Glycolysis / Gluconeogenesis	K01568;K01568;K01568	GO:0005948//acetolactate synthase complex	GO:0000287//magnesium ion binding;GO:0003824//catalytic activity;GO:0003984//acetolactate synthase activity;GO:0008949//oxalyl-CoA decarboxylase activity;GO:0009028//tartronate-semialdehyde synthase activity;GO:0016823//hydrolase activity, acting on acid carbon-carbon bonds, in ketonic substances;GO:0030976//thiamine pyrophosphate binding;GO:0033980//phosphonopyruvate decarboxylase activity;GO:00…	GO:0006113//fermentation;GO:0009097//isoleucine biosynthetic process;GO:0009099//valine biosynthetic process;GO:0009444//pyruvate oxidation;GO:0009636//response to toxic substance;GO:0009684//indoleacetic acid biosynthetic process;GO:0017000//antibiotic biosynthetic process;GO:0019310//inositol catabolic process;GO:0019385//methanogenesis, from acetate;GO:0019529//taurine catabolic process;GO:003…
State 1,2,3,4 -vs- State 1,2,3,5	SK1G00043400	4	8.86479e-12	2.10741e-10	DREB2A	A2WL19.2 RecName: Full=Dehydration-responsive element-binding protein 2A; Short=Protein DREB2A [Oryza sativa Indica Group]	-	-	-	-	-	GO:0003700//transcription factor activity, sequence-specific DNA binding	GO:0006355//regulation of transcription, DNA-templated
State 1,2,3,4 -vs- State 1,2,3,5	SK1G00043408	5	3.10831e-12	7.60422e-11	Os01g0166100	EAY72675.1 hypothetical protein OsI_00541 [Oryza sativa Indica Group]	-	-	-	-	-	GO:0020037//heme binding	-
State 1,2,3,4 -vs- State 1,2,3,5	SK1G00043421	2	5.22298e-08	9.03706e-07	NET4A	EAY72688.1 hypothetical protein OsI_00555 [Oryza sativa Indica Group]	-	-	-	-	GO:0005577//fibrinogen complex	GO:0003779//actin binding;GO:0005102//receptor binding;GO:0005524//ATP binding;GO:0043565//sequence-specific DNA binding	GO:0006355//regulation of transcription, DNA-templated;GO:0007030//Golgi organization;GO:0007059//chromosome segregation;GO:0007094//mitotic spindle assembly checkpoint;GO:0030168//platelet activation;GO:0030261//chromosome condensation;GO:0051258//protein polymerization
State 1,2,3,4 -vs- State 1,2,3,5	SK1G00043438	1	1.53574e-242	1.70477e-239	RFS	EAY72704.1 hypothetical protein OsI_00571 [Oryza sativa Indica Group]	Metabolism;Metabolism	Global and overview maps;Carbohydrate metabolism	ko01100//Metabolic pathways;ko00052//Galactose metabolism	K06617;K06617	-	-	-
State 1,2,3,4 -vs- State 1,2,3,5	SK1G00043500	2	9.90131e-23	4.0897e-21	AT7	EAY72776.1 hypothetical protein OsI_00639 [Oryza sativa Indica Group]	-	-	-	-	-	GO:0016747//transferase activity, transferring acyl groups other than amino-acyl groups	-
State 1,2,3,4 -vs- State 1,2,3,5	SK1G00043516	5	6.1774e-14	1.70235e-12	RPL26A	XP_015621469.1 60S ribosomal protein L26-1 [Oryza sativa Japonica Group]	Genetic Information Processing	Translation	ko03010//Ribosome	K02898	GO:0000315//organellar large ribosomal subunit;GO:0015934//large ribosomal subunit;GO:0022625//cytosolic large ribosomal subunit	GO:0003735//structural constituent of ribosome	GO:0006412//translation
State 1,2,3,4 -vs- State 1,2,3,5	SK1G00043529	4	1.14376e-72	1.84675e-70	NPF8.1	BAG91734.1 unnamed protein product, partial [Oryza sativa Japonica Group]	-	-	-	-	GO:0016020//membrane	GO:0015333//peptide:proton symporter activity;GO:0022857//transmembrane transporter activity	GO:0015833//peptide transport;GO:0055085//transmembrane transport
State 1,2,3,4 -vs- State 1,2,3,5	SK1G00043538	3	5.91145e-10	1.2237e-08	CGR2	EEE53853.1 hypothetical protein OsJ_00337 [Oryza sativa Japonica Group]	-	-	-	-	-	-	GO:0009086//methionine biosynthetic process
State 1,2,3,4 -vs- State 1,2,3,5	SK1G00043563	5	2.18842e-10	4.68579e-09	TPI	XP_015621507.1 triosephosphate isomerase, cytosolic [Oryza sativa Japonica Group]	Metabolism;Metabolism;Metabolism;Metabolism;Metabolism;Metabolism;Metabolism;Metabolism	Global and overview maps;Global and overview maps;Global and overview maps;Global and overview maps;Carbohydrate metabolism;Energy metabolism;Carbohydrate metabolism;Carbohydrate metabolism	ko01100//Metabolic pathways;ko01110//Biosynthesis of secondary metabolites;ko01200//Carbon metabolism;ko01230//Biosynthesis of amino acids;ko00010//Glycolysis / Gluconeogenesis;ko00710//Carbon fixation in photosynthetic organisms;ko00051//Fructose and mannose metabolism;ko00562//Inositol phosphate metabolism	K01803;K01803;K01803;K01803;K01803;K01803;K01803;K01803	-	GO:0004807//triose-phosphate isomerase activity	GO:0006096//glycolytic process
State 1,2,3,4 -vs- State 1,2,3,5	SK1G00043578	1	5.22201e-26	2.43753e-24	MT2A	-	-	-	-	-	-	GO:0008270//zinc ion binding;GO:0046872//metal ion binding	-
State 1,2,3,4 -vs- State 1,2,3,5	SK1G00043592	2	4.08067e-23	1.71543e-21	H2B.6	BAK06939.1 predicted protein [Hordeum vulgare subsp. vulgare] [Hordeum vulgare]	-	-	-	-	GO:0005669//transcription factor TFIID complex	GO:0003677//DNA binding	GO:0006352//DNA-templated transcription, initiation
State 1,2,3,4 -vs- State 1,2,3,5	SK1G00043596	2	1.02944e-63	1.39571e-61	H2B.5	KAF0918260.1 hypothetical protein E2562_023342 [Oryza meyeriana var. granulata] [Oryza meyeriana]	-	-	-	-	GO:0005669//transcription factor TFIID complex	GO:0003677//DNA binding;GO:0005515//protein binding	GO:0006352//DNA-templated transcription, initiation;GO:0009405//pathogenesis
State 1,2,3,4 -vs- State 1,2,3,5	SK1G00043614	5	1.36752e-08	2.50785e-07	RS2Z33	EEE53899.1 hypothetical protein OsJ_00434 [Oryza sativa Japonica Group]	Genetic Information Processing	Transcription	ko03040//Spliceosome	K12896	-	GO:0003676//nucleic acid binding;GO:0008270//zinc ion binding	-
State 1,2,3,4 -vs- State 1,2,3,5	SK1G00004707	5	3.72918e-24	1.62338e-22	TIF3A1	EEC69842.1 hypothetical protein OsI_00169 [Oryza sativa Indica Group]	Genetic Information Processing	Translation	ko03013//RNA transport	K03254	-	-	-
State 1,2,3,4 -vs- State 1,2,3,5	SK1G00043639	1	1.41407e-28	7.17582e-27	--	XP_015640859.1 uncharacterized protein LOC4326042 [Oryza sativa Japonica Group]	-	-	-	-	GO:0016021//integral component of membrane	-	GO:0007155//cell adhesion;GO:0042246//tissue regeneration
State 1,2,3,4 -vs- State 1,2,3,5	SK1G00043640	2	3.88943e-54	4.26421e-52	--	BAS70136.1 Os01g0121500, partial [Oryza sativa Japonica Group]	-	-	-	-	-	-	-
State 1,2,3,4 -vs- State 1,2,3,5	SK1G00043641	1	1.64749e-24	7.30612e-23	--	XP_015640991.1 uncharacterized protein LOC4326044 [Oryza sativa Japonica Group]	-	-	-	-	-	-	-
State 1,2,3,4 -vs- State 1,2,3,5	SK1G00043666	2	2.82053e-47	2.5756e-45	LPR1	XP_015625956.1 multicopper oxidase LPR1 homolog 1 [Oryza sativa Japonica Group]	-	-	-	-	-	GO:0005375//copper ion transmembrane transporter activity;GO:0005507//copper ion binding;GO:0016491//oxidoreductase activity	GO:0006825//copper ion transport;GO:0055114//oxidation-reduction process
State 1,2,3,4 -vs- State 1,2,3,5	SK1G00043672	2	1.10731e-13	2.99574e-12	LPR5	XP_015634240.1 multicopper oxidase LPR1 homolog 3-like [Oryza sativa Japonica Group]	-	-	-	-	-	GO:0005375//copper ion transmembrane transporter activity;GO:0005507//copper ion binding;GO:0016491//oxidoreductase activity	GO:0006825//copper ion transport;GO:0055114//oxidation-reduction process
State 1,2,3,4 -vs- State 1,2,3,5	SK1G00043691	5	2.1542e-29	1.12697e-27	MTP7	XP_015621370.1 metal tolerance protein 7 isoform X1 [Oryza sativa Japonica Group]	-	-	-	-	GO:0016020//membrane;GO:0016021//integral component of membrane	GO:0008324//cation transmembrane transporter activity;GO:0015562//efflux transmembrane transporter activity	GO:0006812//cation transport;GO:0055085//transmembrane transport
State 1,2,3,4 -vs- State 1,2,3,5	SK1G00043694	2	1.33292e-48	1.25592e-46	--	EAY72397.1 hypothetical protein OsI_00250 [Oryza sativa Indica Group]	-	-	-	-	-	-	-
State 1,2,3,4 -vs- State 1,2,3,5	SK1G00043698	5	1.57422e-31	8.86204e-30	--	BAS70220.1 Os01g0131600 [Oryza sativa Japonica Group]	-	-	-	-	-	-	-
State 1,2,3,4 -vs- State 1,2,3,5	SK1G00043699	2	1.79173e-30	9.64332e-29	WIP1	XP_015622812.1 Bowman-Birk type wound-induced proteinase inhibitor WIP1 [Oryza sativa Japonica Group]	-	-	-	-	GO:0005576//extracellular region	GO:0004867//serine-type endopeptidase inhibitor activity	-
State 1,2,3,4 -vs- State 1,2,3,5	SK1G00043724	1	3.12511e-13	8.17453e-12	HSP17.9B	KAB8079851.1 hypothetical protein EE612_000125 [Oryza sativa]	Genetic Information Processing	Folding, sorting and degradation	ko04141//Protein processing in endoplasmic reticulum	K13993	-	-	-
State 1,2,3,4 -vs- State 1,2,3,5	SK1G00043730	2	1.12827e-22	4.63334e-21	LRK10L-1.2	EAY72439.1 hypothetical protein OsI_00293 [Oryza sativa Indica Group]	-	-	-	-	-	GO:0004672//protein kinase activity;GO:0005524//ATP binding;GO:0005525//GTP binding;GO:0030247//polysaccharide binding	GO:0006468//protein phosphorylation
State 1,2,3,4 -vs- State 1,2,3,5	SK1G00043757	5	6.39465e-11	1.43042e-09	RER1A	XP_015621899.1 protein RER1A [Oryza sativa Japonica Group]	-	-	-	-	GO:0016021//integral component of membrane	-	-
State 1,2,3,4 -vs- State 1,2,3,5	SK1G00043774	1	7.16503e-37	4.76622e-35	--	EAZ10240.1 hypothetical protein OsJ_00072 [Oryza sativa Japonica Group]	-	-	-	-	GO:0016021//integral component of membrane	GO:0005249//voltage-gated potassium channel activity;GO:0030955//potassium ion binding;GO:0046983//protein dimerization activity	GO:0006813//potassium ion transport
State 1,2,3,4 -vs- State 1,2,3,5	SK1G00043807	4	8.19664e-14	2.23626e-12	--	-	-	-	-	-	-	GO:0003674//molecular_function	GO:0051205//protein insertion into membrane
State 1,2,3,4 -vs- State 1,2,3,5	SK1G00043834	4	3.95402e-26	1.85052e-24	XAT3	XP_015622308.1 uncharacterized protein LOC4326077 isoform X1 [Oryza sativa Japonica Group]	-	-	-	-	-	-	-
State 1,2,3,4 -vs- State 1,2,3,5	SK1G00068535	4	3.5086e-21	1.36959e-19	LTP110-A	XP_015615428.1 non-specific lipid-transfer protein 3 [Oryza sativa Japonica Group]	-	-	-	-	-	-	-
State 1,2,3,4 -vs- State 1,2,3,5	SK1G00068536	2	1.79504e-151	8.28098e-149	LTP2-A	XP_015615471.1 non-specific lipid-transfer protein 2A [Oryza sativa Japonica Group]	-	-	-	-	-	-	-
State 1,2,3,4 -vs- State 1,2,3,5	SK1G00068582	1	1.08865e-08	2.01938e-07	CIPK14	EAY82084.1 hypothetical protein OsI_37283 [Oryza sativa Indica Group]	-	-	-	-	-	GO:0003674//molecular_function;GO:0004672//protein kinase activity;GO:0005524//ATP binding;GO:0016709//oxidoreductase activity, acting on paired donors, with incorporation or reduction of molecular oxygen, NAD(P)H as one donor, and incorporation of one atom of oxygen	GO:0006468//protein phosphorylation;GO:0006744//ubiquinone biosynthetic process;GO:0007165//signal transduction;GO:0009306//protein secretion
State 1,2,3,4 -vs- State 1,2,3,5	SK1G00068591	2	1.91256e-30	1.02781e-28	GSVIVT00023967001	KAF3327390.1 Peroxidase 68 [Carex littledalei]	Metabolism;Metabolism;Metabolism	Global and overview maps;Global and overview maps;Biosynthesis of other secondary metabolites	ko01100//Metabolic pathways;ko01110//Biosynthesis of secondary metabolites;ko00940//Phenylpropanoid biosynthesis	K00430;K00430;K00430	-	GO:0004601//peroxidase activity;GO:0020037//heme binding;GO:0051015//actin filament binding	GO:0006979//response to oxidative stress;GO:0007155//cell adhesion;GO:0055114//oxidation-reduction process
State 1,2,3,4 -vs- State 1,2,3,5	SK1G00068628	2	1.24783e-11	2.93545e-10	DFO	KAF2906244.1 hypothetical protein DAI22_12g004600 [Oryza sativa Japonica Group]	-	-	-	-	-	-	-
State 1,2,3,4 -vs- State 1,2,3,5	SK1G00068629	2	1.16275e-53	1.25542e-51	FER1	EAY81986.1 hypothetical protein OsI_37168 [Oryza sativa Indica Group]	-	-	-	-	-	GO:0008199//ferric iron binding;GO:0016491//oxidoreductase activity;GO:0046872//metal ion binding	GO:0055114//oxidation-reduction process
State 1,2,3,4 -vs- State 1,2,3,5	SK1G00068641	2	1.049e-15	3.14188e-14	DES3	XP_015618431.1 fatty acid desaturase DES3 [Oryza sativa Japonica Group]	-	-	-	-	-	GO:0016717//oxidoreductase activity, acting on paired donors, with oxidation of a pair of donors resulting in the reduction of molecular oxygen to two molecules of water	GO:0006629//lipid metabolic process;GO:0055114//oxidation-reduction process
State 1,2,3,4 -vs- State 1,2,3,5	SK1G00068685	5	1.57091e-43	1.26535e-41	IPMSA	XP_015619620.1 2-isopropylmalate synthase A [Oryza sativa Japonica Group]	Metabolism;Metabolism;Metabolism;Metabolism;Metabolism;Metabolism	Global and overview maps;Global and overview maps;Global and overview maps;Carbohydrate metabolism;Global and overview maps;Amino acid metabolism	ko01100//Metabolic pathways;ko01110//Biosynthesis of secondary metabolites;ko01230//Biosynthesis of amino acids;ko00620//Pyruvate metabolism;ko01210//2-Oxocarboxylic acid metabolism;ko00290//Valine, leucine and isoleucine biosynthesis	K01649;K01649;K01649;K01649;K01649;K01649	GO:0005737//cytoplasm	GO:0003824//catalytic activity;GO:0003852//2-isopropylmalate synthase activity;GO:0004410//homocitrate synthase activity;GO:0004736//pyruvate carboxylase activity;GO:0008701//4-hydroxy-2-oxovalerate aldolase activity;GO:0008948//oxaloacetate decarboxylase activity;GO:0015081//sodium ion transmembrane transporter activity;GO:0043714//(R)-citramalate synthase activity	GO:0006094//gluconeogenesis;GO:0006814//sodium ion transport;GO:0009097//isoleucine biosynthetic process;GO:0009098//leucine biosynthetic process;GO:0051188//cofactor biosynthetic process
State 1,2,3,4 -vs- State 1,2,3,5	SK1G00068694	4	4.1824e-13	1.08522e-11	TAP46	EAY79895.1 hypothetical protein OsI_35058 [Oryza sativa Indica Group]	Cellular Processes	Transport and catabolism	ko04136//Autophagy - other eukaryotes	K17606	-	-	GO:0009966//regulation of signal transduction
State 1,2,3,4 -vs- State 1,2,3,5	SK1G00068696	4	3.5543e-09	6.87667e-08	CCDA2	XP_015620194.1 cytochrome c-type biogenesis ccda-like chloroplastic protein 2 [Oryza sativa Japonica Group]	-	-	-	-	GO:0016020//membrane	-	GO:0017004//cytochrome complex assembly;GO:0055114//oxidation-reduction process
State 1,2,3,4 -vs- State 1,2,3,5	SK1G00068700	2	5.78967e-17	1.85782e-15	ACA9	XP_015620481.1 probable calcium-transporting ATPase 9, plasma membrane-type [Oryza sativa Japonica Group]	-	-	-	-	GO:0031004//potassium ion-transporting ATPase complex	GO:0004008//copper-exporting ATPase activity;GO:0004647//phosphoserine phosphatase activity;GO:0005375//copper ion transmembrane transporter activity;GO:0005388//calcium-transporting ATPase activity;GO:0005516//calmodulin binding;GO:0008556//potassium-transporting ATPase activity;GO:0008967//phosphoglycolate phosphatase activity;GO:0015434//cadmium-transporting ATPase activity;GO:0015444//magnesi…	GO:0006545//glycine biosynthetic process;GO:0006564//L-serine biosynthetic process;GO:0006813//potassium ion transport;GO:0006816//calcium ion transport;GO:0006825//copper ion transport;GO:0008152//metabolic process;GO:0015691//cadmium ion transport;GO:0015693//magnesium ion transport;GO:0030001//metal ion transport
State 1,2,3,4 -vs- State 1,2,3,5	SK1G00068719	2	2.71885e-10	5.77626e-09	HMGCL	XP_015619970.1 hydroxymethylglutaryl-CoA lyase, mitochondrial isoform X1 [Oryza sativa Japonica Group]	Metabolism;Metabolism;Cellular Processes;Metabolism;Metabolism;Metabolism	Global and overview maps;Global and overview maps;Transport and catabolism;Amino acid metabolism;Carbohydrate metabolism;Lipid metabolism	ko01100//Metabolic pathways;ko01110//Biosynthesis of secondary metabolites;ko04146//Peroxisome;ko00280//Valine, leucine and isoleucine degradation;ko00650//Butanoate metabolism;ko00072//Synthesis and degradation of ketone bodies	K01640;K01640;K01640;K01640;K01640;K01640	GO:0005737//cytoplasm	GO:0003824//catalytic activity;GO:0003852//2-isopropylmalate synthase activity;GO:0004410//homocitrate synthase activity;GO:0004736//pyruvate carboxylase activity;GO:0005525//GTP binding;GO:0008701//4-hydroxy-2-oxovalerate aldolase activity;GO:0008948//oxaloacetate decarboxylase activity;GO:0015081//sodium ion transmembrane transporter activity;GO:0043714//(R)-citramalate synthase activity	GO:0006094//gluconeogenesis;GO:0006777//Mo-molybdopterin cofactor biosynthetic process;GO:0006814//sodium ion transport;GO:0009097//isoleucine biosynthetic process;GO:0009098//leucine biosynthetic process;GO:0051188//cofactor biosynthetic process
State 1,2,3,4 -vs- State 1,2,3,5	SK1G00068741	4	3.69921e-11	8.45581e-10	GFPT2	EEC68810.1 hypothetical protein OsI_37368 [Oryza sativa Indica Group]	Metabolism;Metabolism;Metabolism	Global and overview maps;Carbohydrate metabolism;Amino acid metabolism	ko01100//Metabolic pathways;ko00520//Amino sugar and nucleotide sugar metabolism;ko00250//Alanine, aspartate and glutamate metabolism	K00820;K00820;K00820	-	GO:0004044//amidophosphoribosyltransferase activity;GO:0004066//asparagine synthase (glutamine-hydrolyzing) activity;GO:0004360//glutamine-fructose-6-phosphate transaminase (isomerizing) activity;GO:0016835//carbon-oxygen lyase activity;GO:0097367//carbohydrate derivative binding	GO:0006040//amino sugar metabolic process;GO:0006529//asparagine biosynthetic process;GO:0009152//purine ribonucleotide biosynthetic process;GO:0009252//peptidoglycan biosynthetic process;GO:0009254//peptidoglycan turnover;GO:1901135//carbohydrate derivative metabolic process
State 1,2,3,4 -vs- State 1,2,3,5	SK1G00068767	4	1.58057e-09	3.16489e-08	--	EEE52694.1 hypothetical protein OsJ_35091 [Oryza sativa Japonica Group]	-	-	-	-	-	-	-
State 1,2,3,4 -vs- State 1,2,3,5	SK1G00068791	5	1.50767e-43	1.21717e-41	RPS16A	XP_015617880.1 40S ribosomal protein S16-like [Oryza sativa Japonica Group]	Genetic Information Processing	Translation	ko03010//Ribosome	K02960	GO:0005840//ribosome;GO:0022627//cytosolic small ribosomal subunit	GO:0003735//structural constituent of ribosome	GO:0006412//translation
State 1,2,3,4 -vs- State 1,2,3,5	SK1G00068814	4	3.54081e-33	2.09435e-31	--	XP_015620751.1 NDR1/HIN1-like protein 3 [Oryza sativa Japonica Group]	-	-	-	-	-	-	-
State 1,2,3,4 -vs- State 1,2,3,5	SK1G00068841	2	8.89018e-47	7.95458e-45	ROPGAP1	XP_015619660.1 rho GTPase-activating protein 4 [Oryza sativa Japonica Group]	-	-	-	-	-	-	GO:0007165//signal transduction
State 1,2,3,4 -vs- State 1,2,3,5	SK1G00068843	2	2.47192e-68	3.62841e-66	Os12g0154700	RWR81871.1 putative germin-like protein 2-1 [Cinnamomum micranthum f. kanehirae]	-	-	-	-	-	GO:0000166//nucleotide binding;GO:0003677//DNA binding;GO:0004553//hydrolase activity, hydrolyzing O-glycosyl compounds	GO:0005975//carbohydrate metabolic process;GO:0006355//regulation of transcription, DNA-templated
State 1,2,3,4 -vs- State 1,2,3,5	SK1G00068858	5	1.52219e-08	2.78145e-07	ACR12	XP_015619723.1 ACT domain-containing protein ACR12 [Oryza sativa Japonica Group]	-	-	-	-	-	GO:0008773//[protein-PII] uridylyltransferase activity	GO:0018177//protein uridylylation
State 1,2,3,4 -vs- State 1,2,3,5	SK1G00068871	2	3.76389e-18	1.28189e-16	CYP94C1	BAF29185.2 Os12g0150200, partial [Oryza sativa Japonica Group]	-	-	-	-	-	GO:0005506//iron ion binding;GO:0016705//oxidoreductase activity, acting on paired donors, with incorporation or reduction of molecular oxygen;GO:0020037//heme binding	GO:0055114//oxidation-reduction process
State 1,2,3,4 -vs- State 1,2,3,5	SK1G00068872	5	3.65285e-32	2.09623e-30	RPL26A	XP_015618223.1 60S ribosomal protein L26-1 [Oryza sativa Japonica Group]	Genetic Information Processing	Translation	ko03010//Ribosome	K02898	GO:0000315//organellar large ribosomal subunit;GO:0015934//large ribosomal subunit;GO:0022625//cytosolic large ribosomal subunit	GO:0003735//structural constituent of ribosome	GO:0006412//translation
State 1,2,3,4 -vs- State 1,2,3,5	SK1G00068873	4	1.82031e-14	5.14293e-13	IQM3	XP_015620230.1 IQ domain-containing protein IQM3 [Oryza sativa Japonica Group]	-	-	-	-	-	GO:0005515//protein binding	-
State 1,2,3,4 -vs- State 1,2,3,5	SK1G00068889	3	8.54334e-120	2.89025e-117	PSK5	EAY82259.1 hypothetical protein OsI_37465 [Oryza sativa Indica Group]	-	-	-	-	GO:0005576//extracellular region	GO:0008083//growth factor activity	GO:0006915//apoptotic process;GO:0007050//cell cycle arrest;GO:0008283//cell proliferation;GO:0008285//negative regulation of cell proliferation
State 1,2,3,4 -vs- State 1,2,3,5	SK1G00068903	4	3.25516e-22	1.31397e-20	OsI_37456	XP_015620584.1 pyruvate kinase 2, cytosolic [Oryza sativa Japonica Group]	Metabolism;Metabolism;Metabolism;Metabolism;Metabolism;Metabolism;Metabolism	Global and overview maps;Global and overview maps;Global and overview maps;Global and overview maps;Carbohydrate metabolism;Nucleotide metabolism;Carbohydrate metabolism	ko01100//Metabolic pathways;ko01110//Biosynthesis of secondary metabolites;ko01200//Carbon metabolism;ko01230//Biosynthesis of amino acids;ko00010//Glycolysis / Gluconeogenesis;ko00230//Purine metabolism;ko00620//Pyruvate metabolism	K00873;K00873;K00873;K00873;K00873;K00873;K00873	GO:0005737//cytoplasm	GO:0000287//magnesium ion binding;GO:0004743//pyruvate kinase activity;GO:0030955//potassium ion binding	GO:0006096//glycolytic process
State 1,2,3,4 -vs- State 1,2,3,5	SK1G00068908	1	7.39228e-47	6.63103e-45	TSJT1	XP_015620578.1 stem-specific protein TSJT1 [Oryza sativa Japonica Group]	-	-	-	-	-	GO:0004044//amidophosphoribosyltransferase activity;GO:0004066//asparagine synthase (glutamine-hydrolyzing) activity	GO:0006529//asparagine biosynthetic process;GO:0009152//purine ribonucleotide biosynthetic process
State 1,2,3,4 -vs- State 1,2,3,5	SK1G00068941	4	1.4279e-11	3.34355e-10	TMN1	XP_015620156.1 transmembrane 9 superfamily member 1 [Oryza sativa Japonica Group]	-	-	-	-	GO:0016021//integral component of membrane	-	-
State 1,2,3,4 -vs- State 1,2,3,5	SK1G00068981	3	2.46667e-08	4.4075e-07	LACS9	XP_015620747.1 long chain acyl-CoA synthetase 9, chloroplastic [Oryza sativa Japonica Group]	Metabolism;Cellular Processes;Metabolism;Metabolism;Metabolism	Global and overview maps;Transport and catabolism;Global and overview maps;Lipid metabolism;Lipid metabolism	ko01100//Metabolic pathways;ko04146//Peroxisome;ko01212//Fatty acid metabolism;ko00071//Fatty acid degradation;ko00061//Fatty acid biosynthesis	K01897;K01897;K01897;K01897;K01897	-	GO:0003987//acetate-CoA ligase activity;GO:0004043//L-aminoadipate-semialdehyde dehydrogenase activity;GO:0008668//(2,3-dihydroxybenzoyl)adenylate synthase activity;GO:0008756//o-succinylbenzoate-CoA ligase activity;GO:0030729//acetoacetate-CoA ligase activity;GO:0047473//D-alanine-poly(phosphoribitol) ligase activity;GO:0050218//propionate-CoA ligase activity	GO:0009234//menaquinone biosynthetic process;GO:0019287//isopentenyl diphosphate biosynthetic process, mevalonate pathway;GO:0019290//siderophore biosynthetic process;GO:0019350//teichoic acid biosynthetic process;GO:0019427//acetyl-CoA biosynthetic process from acetate;GO:0019878//lysine biosynthetic process via aminoadipic acid
State 1,2,3,4 -vs- State 1,2,3,5	SK1G00068987	5	4.54948e-50	4.46427e-48	RPL3	XP_015619855.1 60S ribosomal protein L3 [Oryza sativa Japonica Group]	Genetic Information Processing	Translation	ko03010//Ribosome	K02925	GO:0005840//ribosome;GO:0022625//cytosolic large ribosomal subunit	GO:0003735//structural constituent of ribosome	GO:0006412//translation
State 1,2,3,4 -vs- State 1,2,3,5	SK1G00069019	2	1.45439e-30	7.85149e-29	WNK9	XP_015620490.1 probable serine/threonine-protein kinase WNK9 [Oryza sativa Japonica Group]	-	-	-	-	-	GO:0004672//protein kinase activity;GO:0004674//protein serine/threonine kinase activity;GO:0005524//ATP binding	GO:0006468//protein phosphorylation
State 1,2,3,4 -vs- State 1,2,3,5	SK1G00069025	2	7.29866e-26	3.38463e-24	PUB24	XP_015618963.1 E3 ubiquitin-protein ligase PUB23 [Oryza sativa Japonica Group]	-	-	-	-	-	GO:0004121//cystathionine beta-lyase activity;GO:0004842//ubiquitin-protein transferase activity;GO:0008270//zinc ion binding	GO:0009086//methionine biosynthetic process;GO:0016567//protein ubiquitination
State 1,2,3,4 -vs- State 1,2,3,5	SK1G00069075	2	1.46739e-306	2.17186e-303	csd	EEC68979.1 hypothetical protein OsI_37729 [Oryza sativa Indica Group]	-	-	-	-	-	GO:0030170//pyridoxal phosphate binding;GO:0031071//cysteine desulfurase activity	GO:0009058//biosynthetic process;GO:0016226//iron-sulfur cluster assembly
State 1,2,3,4 -vs- State 1,2,3,5	SK1G00069076	4	3.68714e-16	1.13104e-14	PPD4	XP_015618101.1 psbP domain-containing protein 4, chloroplastic [Oryza sativa Japonica Group]	-	-	-	-	GO:0009523//photosystem II;GO:0009654//photosystem II oxygen evolving complex;GO:0019898//extrinsic component of membrane	GO:0005509//calcium ion binding	GO:0015979//photosynthesis
State 1,2,3,4 -vs- State 1,2,3,5	SK1G00069084	5	5.85829e-13	1.50251e-11	At1g77060	EAY82504.1 hypothetical protein OsI_37721 [Oryza sativa Indica Group]	-	-	-	-	-	GO:0004451//isocitrate lyase activity;GO:0008807//carboxyvinyl-carboxyphosphonate phosphorylmutase activity;GO:0033978//phosphonopyruvate hydrolase activity;GO:0046421//methylisocitrate lyase activity;GO:0050188//phosphoenolpyruvate mutase activity	GO:0006099//tricarboxylic acid cycle;GO:0019629//propionate catabolic process, 2-methylcitrate cycle;GO:0019634//organic phosphonate metabolic process;GO:0019752//carboxylic acid metabolic process
State 1,2,3,4 -vs- State 1,2,3,5	SK1G00069087	3	1.82407e-51	1.85657e-49	TRXM	KAF0888141.1 hypothetical protein E2562_010839 [Oryza meyeriana var. granulata] [Oryza meyeriana]	-	-	-	-	GO:0005737//cytoplasm	GO:0003756//protein disulfide isomerase activity;GO:0015036//disulfide oxidoreductase activity;GO:0016209//antioxidant activity;GO:0016491//oxidoreductase activity;GO:0016667//oxidoreductase activity, acting on a sulfur group of donors	GO:0006457//protein folding;GO:0006790//sulfur compound metabolic process;GO:0055114//oxidation-reduction process
State 1,2,3,4 -vs- State 1,2,3,5	SK1G00069108	2	5.52421e-11	1.24275e-09	AAP3	EAY82481.1 hypothetical protein OsI_37698 [Oryza sativa Indica Group]	-	-	-	-	-	-	-
State 1,2,3,4 -vs- State 1,2,3,5	SK1G00069109	1	1.15197e-187	7.8693e-185	AAP3	EEC68963.1 hypothetical protein OsI_37697 [Oryza sativa Indica Group]	-	-	-	-	-	-	-
State 1,2,3,4 -vs- State 1,2,3,5	SK1G00069221	4	1.54943e-08	2.82831e-07	ADK-A	XP_015618268.1 adenylate kinase 3 [Oryza sativa Japonica Group]	Metabolism;Metabolism;Metabolism;Metabolism	Global and overview maps;Global and overview maps;Nucleotide metabolism;Metabolism of cofactors and vitamins	ko01100//Metabolic pathways;ko01110//Biosynthesis of secondary metabolites;ko00230//Purine metabolism;ko00730//Thiamine metabolism	K00939;K00939;K00939;K00939	GO:0000502//proteasome complex	GO:0004017//adenylate kinase activity;GO:0005524//ATP binding;GO:0009378//four-way junction helicase activity;GO:0016301//kinase activity;GO:0016887//ATPase activity	GO:0006281//DNA repair;GO:0006310//DNA recombination;GO:0009151//purine deoxyribonucleotide metabolic process;GO:0010498//proteasomal protein catabolic process;GO:0019941//modification-dependent protein catabolic process
State 1,2,3,4 -vs- State 1,2,3,5	SK1G00069226	4	1.05546e-10	2.31147e-09	At4g24830	EAY82685.1 hypothetical protein OsI_37900 [Oryza sativa Indica Group]	Metabolism;Metabolism;Metabolism;Metabolism;Metabolism	Global and overview maps;Global and overview maps;Global and overview maps;Amino acid metabolism;Amino acid metabolism	ko01100//Metabolic pathways;ko01110//Biosynthesis of secondary metabolites;ko01230//Biosynthesis of amino acids;ko00250//Alanine, aspartate and glutamate metabolism;ko00220//Arginine biosynthesis	K01940;K01940;K01940;K01940;K01940	-	GO:0004055//argininosuccinate synthase activity;GO:0005524//ATP binding	GO:0006526//arginine biosynthetic process;GO:0008616//queuosine biosynthetic process;GO:0042450//arginine biosynthetic process via ornithine
State 1,2,3,4 -vs- State 1,2,3,5	SK1G00069281	2	5.75952e-156	2.69197e-153	LAC25	XP_015618859.1 laccase-25-like [Oryza sativa Japonica Group]	-	-	-	-	-	GO:0003725//double-stranded RNA binding;GO:0005375//copper ion transmembrane transporter activity;GO:0005507//copper ion binding;GO:0016491//oxidoreductase activity	GO:0006825//copper ion transport;GO:0055114//oxidation-reduction process
State 1,2,3,4 -vs- State 1,2,3,5	SK1G00069348	2	7.49956e-237	7.61141e-234	CYP71P1	XP_015618264.1 tryptamine 5-hydroxylase [Oryza sativa Japonica Group]	-	-	-	-	-	GO:0005506//iron ion binding;GO:0016705//oxidoreductase activity, acting on paired donors, with incorporation or reduction of molecular oxygen;GO:0020037//heme binding	GO:0055114//oxidation-reduction process
State 1,2,3,4 -vs- State 1,2,3,5	SK1G00069395	2	1.08512e-15	3.23913e-14	LAC24	XP_015618619.1 laccase-24 [Oryza sativa Japonica Group]	-	-	-	-	-	GO:0005375//copper ion transmembrane transporter activity;GO:0005507//copper ion binding;GO:0016491//oxidoreductase activity	GO:0006825//copper ion transport;GO:0055114//oxidation-reduction process
State 1,2,3,4 -vs- State 1,2,3,5	SK1G00069444	3	1.56422e-13	4.17776e-12	CPN60A1	XP_015620475.1 ruBisCO large subunit-binding protein subunit alpha, chloroplastic [Oryza sativa Japonica Group]	-	-	-	-	-	GO:0005515//protein binding;GO:0005524//ATP binding;GO:0016887//ATPase activity	GO:0006457//protein folding
State 1,2,3,4 -vs- State 1,2,3,5	SK1G00069454	3	9.52728e-49	9.02474e-47	RBCS	XP_015619872.1 ribulose bisphosphate carboxylase small chain, chloroplastic [Oryza sativa Japonica Group]	Metabolism;Metabolism;Metabolism;Metabolism;Metabolism	Global and overview maps;Global and overview maps;Global and overview maps;Energy metabolism;Carbohydrate metabolism	ko01100//Metabolic pathways;ko01110//Biosynthesis of secondary metabolites;ko01200//Carbon metabolism;ko00710//Carbon fixation in photosynthetic organisms;ko00630//Glyoxylate and dicarboxylate metabolism	K01602;K01602;K01602;K01602;K01602	-	-	-
State 1,2,3,4 -vs- State 1,2,3,5	SK1G00069458	2	2.78501e-26	1.31032e-24	At1g33811	ABA97424.1 GDSL-motif lipase/hydrolase, putative [Oryza sativa Japonica Group]	-	-	-	-	-	GO:0016788//hydrolase activity, acting on ester bonds	-
State 1,2,3,4 -vs- State 1,2,3,5	SK1G00069485	3	3.48568e-11	7.98313e-10	RBCS	XP_015620270.1 ribulose bisphosphate carboxylase small chain, chloroplastic-like [Oryza sativa Japonica Group]	Metabolism;Metabolism;Metabolism;Metabolism;Metabolism	Global and overview maps;Global and overview maps;Global and overview maps;Energy metabolism;Carbohydrate metabolism	ko01100//Metabolic pathways;ko01110//Biosynthesis of secondary metabolites;ko01200//Carbon metabolism;ko00710//Carbon fixation in photosynthetic organisms;ko00630//Glyoxylate and dicarboxylate metabolism	K01602;K01602;K01602;K01602;K01602	-	-	-
State 1,2,3,4 -vs- State 1,2,3,5	SK1G00069489	3	6.64089e-34	4.03934e-32	RBCS-A	XP_015619409.1 ribulose bisphosphate carboxylase small chain A, chloroplastic-like [Oryza sativa Japonica Group]	Metabolism;Metabolism;Metabolism;Metabolism;Metabolism	Global and overview maps;Global and overview maps;Global and overview maps;Energy metabolism;Carbohydrate metabolism	ko01100//Metabolic pathways;ko01110//Biosynthesis of secondary metabolites;ko01200//Carbon metabolism;ko00710//Carbon fixation in photosynthetic organisms;ko00630//Glyoxylate and dicarboxylate metabolism	K01602;K01602;K01602;K01602;K01602	-	-	-
State 1,2,3,4 -vs- State 1,2,3,5	SK1G00069491	3	0	0	RBCS-A	ASU47382.1 ribulose-1,5-bisphosphate carboxylase/oxygenase small subunit [Oryza punctata]	Metabolism;Metabolism;Metabolism;Metabolism;Metabolism	Global and overview maps;Global and overview maps;Global and overview maps;Energy metabolism;Carbohydrate metabolism	ko01100//Metabolic pathways;ko01110//Biosynthesis of secondary metabolites;ko01200//Carbon metabolism;ko00710//Carbon fixation in photosynthetic organisms;ko00630//Glyoxylate and dicarboxylate metabolism	K01602;K01602;K01602;K01602;K01602	-	-	-
State 1,2,3,4 -vs- State 1,2,3,5	SK1G00069543	5	1.75091e-16	5.48949e-15	RPS3A	XP_015620663.1 40S ribosomal protein S3a-like [Oryza sativa Japonica Group]	Genetic Information Processing	Translation	ko03010//Ribosome	K02984	GO:0005840//ribosome	GO:0003735//structural constituent of ribosome	GO:0006412//translation
State 1,2,3,4 -vs- State 1,2,3,5	SK1G00069576	4	4.38326e-39	3.06501e-37	CDKF-2	EAY82919.1 hypothetical protein OsI_38134 [Oryza sativa Indica Group]	-	-	-	-	-	GO:0004672//protein kinase activity;GO:0005524//ATP binding;GO:0016709//oxidoreductase activity, acting on paired donors, with incorporation or reduction of molecular oxygen, NAD(P)H as one donor, and incorporation of one atom of oxygen	GO:0006468//protein phosphorylation;GO:0006744//ubiquinone biosynthetic process
State 1,2,3,4 -vs- State 1,2,3,5	SK1G00069585	3	6.76432e-38	4.59431e-36	PSAL	XP_015620442.1 photosystem I reaction center subunit XI, chloroplastic [Oryza sativa Japonica Group]	Metabolism	Energy metabolism	ko00195//Photosynthesis	K02699	GO:0009522//photosystem I;GO:0009538//photosystem I reaction center	-	GO:0015979//photosynthesis
State 1,2,3,4 -vs- State 1,2,3,5	SK1G00069629	2	3.63173e-21	1.41609e-19	OsI_036922	XP_015620672.1 probable histone H2A.7 [Oryza sativa Japonica Group]	-	-	-	-	-	GO:0003677//DNA binding	-
State 1,2,3,4 -vs- State 1,2,3,5	SK1G00069631	2	8.20335e-134	3.20219e-131	--	EEC69197.1 hypothetical protein OsI_38185 [Oryza sativa Indica Group]	-	-	-	-	-	GO:0004867//serine-type endopeptidase inhibitor activity	GO:0009611//response to wounding
State 1,2,3,4 -vs- State 1,2,3,5	SK1G00069679	2	3.40099e-33	2.02024e-31	DOX1	EAY82977.1 hypothetical protein OsI_38200 [Oryza sativa Indica Group]	Metabolism	Lipid metabolism	ko00592//alpha-Linolenic acid metabolism	K10529	-	-	-
State 1,2,3,4 -vs- State 1,2,3,5	SK1G00069703	5	9.58148e-09	1.7857e-07	At3g62120	XP_015620497.1 proline--tRNA ligase, cytoplasmic [Oryza sativa Japonica Group]	Genetic Information Processing	Translation	ko00970//Aminoacyl-tRNA biosynthesis	K01881	GO:0005737//cytoplasm;GO:0009345//glycine-tRNA ligase complex	GO:0000166//nucleotide binding;GO:0004812//aminoacyl-tRNA ligase activity;GO:0004820//glycine-tRNA ligase activity;GO:0004827//proline-tRNA ligase activity;GO:0004829//threonine-tRNA ligase activity;GO:0005524//ATP binding	GO:0006418//tRNA aminoacylation for protein translation;GO:0006426//glycyl-tRNA aminoacylation;GO:0006433//prolyl-tRNA aminoacylation;GO:0006435//threonyl-tRNA aminoacylation
State 1,2,3,4 -vs- State 1,2,3,5	SK1G00069774	2	4.07965e-09	7.8461e-08	--	-	-	-	-	-	-	-	-
State 1,2,3,4 -vs- State 1,2,3,5	SK1G00069818	2	2.82136e-31	1.5635e-29	NAC083	EAY83089.1 hypothetical protein OsI_38306 [Oryza sativa Indica Group]	-	-	-	-	-	GO:0003677//DNA binding	GO:0006355//regulation of transcription, DNA-templated
State 1,2,3,4 -vs- State 1,2,3,5	SK1G00069865	4	3.6387e-98	1.0098e-95	UPS2	XP_015619370.1 ureide permease 2 isoform X1 [Oryza sativa Japonica Group]	-	-	-	-	GO:0016021//integral component of membrane	GO:0015144//carbohydrate transmembrane transporter activity	GO:0034219//carbohydrate transmembrane transport;GO:0071705//nitrogen compound transport
State 1,2,3,4 -vs- State 1,2,3,5	SK1G00069870	5	1.77746e-26	8.42975e-25	RBG3	EAY83219.1 hypothetical protein OsI_38428 [Oryza sativa Indica Group]	Genetic Information Processing	Transcription	ko03040//Spliceosome	K12741	-	GO:0003676//nucleic acid binding	GO:0008380//RNA splicing
State 1,2,3,4 -vs- State 1,2,3,5	SK1G00070035	5	2.7273e-36	1.79074e-34	EIF-5A2	XP_015620359.1 eukaryotic translation initiation factor 5A-2 [Oryza sativa Japonica Group]	-	-	-	-	GO:0005737//cytoplasm	GO:0003723//RNA binding;GO:0003746//translation elongation factor activity;GO:0043022//ribosome binding	GO:0006414//translational elongation;GO:0045901//positive regulation of translational elongation;GO:0045905//positive regulation of translational termination
State 1,2,3,4 -vs- State 1,2,3,5	SK1G00070036	4	2.71824e-09	5.34647e-08	CNX2	XP_015620645.1 GTP 3',8-cyclase, mitochondrial isoform X3 [Oryza sativa Japonica Group]	Metabolism;Metabolism;Genetic Information Processing	Global and overview maps;Metabolism of cofactors and vitamins;Folding, sorting and degradation	ko01100//Metabolic pathways;ko00790//Folate biosynthesis;ko04122//Sulfur relay system	K03639;K03639;K03639	GO:0005737//cytoplasm;GO:0005811//lipid particle;GO:0019008//molybdopterin synthase complex	GO:0003824//catalytic activity;GO:0004076//biotin synthase activity;GO:0016491//oxidoreductase activity;GO:0016829//lyase activity;GO:0016831//carboxy-lyase activity;GO:0043365//[formate-C-acetyltransferase]-activating enzyme activity;GO:0051536//iron-sulfur cluster binding;GO:0051537//2 iron, 2 sulfur cluster binding;GO:0051539//4 iron, 4 sulfur cluster binding;GO:0051989//coproporphyrinogen deh…	GO:0006400//tRNA modification;GO:0006777//Mo-molybdopterin cofactor biosynthetic process;GO:0006779//porphyrin-containing compound biosynthetic process;GO:0006783//heme biosynthetic process;GO:0006785//heme b biosynthetic process;GO:0008150//biological_process;GO:0008152//metabolic process;GO:0008652//cellular amino acid biosynthetic process;GO:0009058//biosynthetic process;GO:0009102//biotin bio…
State 1,2,3,4 -vs- State 1,2,3,5	SK1G00070140	2	0	0	--	AAF85972.1 pathogenesis-related protein PR-10a [Oryza sativa Indica Group]	-	-	-	-	-	-	GO:0006952//defense response
State 1,2,3,4 -vs- State 1,2,3,5	SK1G00070141	2	7.36006e-76	1.26915e-73	--	XP_015618805.1 major pollen allergen Bet v 1-G [Oryza sativa Japonica Group]	-	-	-	-	-	-	GO:0006952//defense response
State 1,2,3,4 -vs- State 1,2,3,5	SK1G00070142	2	3.98255e-74	6.54946e-72	--	XP_015618351.1 major pollen allergen Bet v 1-D/H [Oryza sativa Japonica Group]	-	-	-	-	-	-	GO:0006952//defense response
State 1,2,3,4 -vs- State 1,2,3,5	SK1G00070144	2	2.0235e-31	1.13195e-29	--	XP_015620489.1 major allergen Dau c 1 [Oryza sativa Japonica Group]	-	-	-	-	-	-	GO:0006952//defense response
State 1,2,3,4 -vs- State 1,2,3,5	SK1G00070148	2	1.76988e-16	5.54407e-15	DAGLA	XP_015620811.1 uncharacterized protein LOC4352485 [Oryza sativa Japonica Group]	-	-	-	-	-	GO:0016787//hydrolase activity	GO:0006629//lipid metabolic process;GO:0016042//lipid catabolic process
State 1,2,3,4 -vs- State 1,2,3,5	SK1G00070177	2	1.78856e-18	6.15632e-17	--	TVU18501.1 hypothetical protein EJB05_34604, partial [Eragrostis curvula]	-	-	-	-	-	GO:0004867//serine-type endopeptidase inhibitor activity	GO:0006915//apoptotic process;GO:0007050//cell cycle arrest;GO:0008285//negative regulation of cell proliferation;GO:0009611//response to wounding
State 1,2,3,4 -vs- State 1,2,3,5	SK1G00070179	1	3.2978e-24	1.44266e-22	TIMPA	EAY83431.1 hypothetical protein OsI_38645 [Oryza sativa Indica Group]	-	-	-	-	-	GO:0004867//serine-type endopeptidase inhibitor activity	GO:0009611//response to wounding
State 1,2,3,4 -vs- State 1,2,3,5	SK1G00070180	2	5.29762e-21	2.05215e-19	--	XP_015618062.1 subtilisin-chymotrypsin inhibitor-2A [Oryza sativa Japonica Group]	-	-	-	-	-	GO:0004867//serine-type endopeptidase inhibitor activity	GO:0009611//response to wounding
State 1,2,3,4 -vs- State 1,2,3,5	SK1G00070195	2	4.80659e-14	1.33079e-12	PAP1	TVU49571.1 hypothetical protein EJB05_00884 [Eragrostis curvula]	-	-	-	-	-	GO:0003993//acid phosphatase activity;GO:0016787//hydrolase activity;GO:0016788//hydrolase activity, acting on ester bonds;GO:0046872//metal ion binding	-
State 1,2,3,4 -vs- State 1,2,3,5	SK1G00070221	2	3.70269e-13	9.62158e-12	RS2	KAF2908431.1 hypothetical protein DAI22_12g184500 [Oryza sativa Japonica Group]	-	-	-	-	GO:0005634//nucleus	GO:0003676//nucleic acid binding;GO:0005524//ATP binding;GO:0016818//hydrolase activity, acting on acid anhydrides, in phosphorus-containing anhydrides	GO:0006338//chromatin remodeling
State 1,2,3,4 -vs- State 1,2,3,5	SK1G00070227	5	3.46034e-15	1.01334e-13	TIM9	XP_015620238.1 mitochondrial import inner membrane translocase subunit Tim9 [Oryza sativa Japonica Group]	-	-	-	-	-	-	-
State 1,2,3,4 -vs- State 1,2,3,5	SK1G00070228	2	1.34778e-31	7.61145e-30	MT4C	XP_015620236.1 metallothionein-like protein 4C [Oryza sativa Japonica Group]	-	-	-	-	-	GO:0008270//zinc ion binding;GO:0046872//metal ion binding	-
State 1,2,3,4 -vs- State 1,2,3,5	SK1G00070230	2	0	0	MT4A	Q0IMG5.1 RecName: Full=Metallothionein-like protein 4A; AltName: Full=Class I metallothionein-like protein 4A; AltName: Full=OsMT-I-4a; AltName: Full=OsMT1b [Oryza sativa Japonica Group]	-	-	-	-	-	GO:0008270//zinc ion binding;GO:0046872//metal ion binding	-
State 1,2,3,4 -vs- State 1,2,3,5	SK1G00070235	2	5.74477e-16	1.74564e-14	SPL11	KAF2908413.1 hypothetical protein DAI22_12g182900 [Oryza sativa Japonica Group]	-	-	-	-	GO:0000109//nucleotide-excision repair complex	GO:0004842//ubiquitin-protein transferase activity;GO:0005515//protein binding;GO:0008270//zinc ion binding	GO:0006289//nucleotide-excision repair;GO:0016567//protein ubiquitination
State 1,2,3,4 -vs- State 1,2,3,5	SK1G00070239	1	2.48884e-14	6.97778e-13	--	EAY83577.1 hypothetical protein OsI_38787 [Oryza sativa Indica Group]	-	-	-	-	-	GO:0000155//phosphorelay sensor kinase activity;GO:0004721//phosphoprotein phosphatase activity	GO:0000160//phosphorelay signal transduction system
State 1,2,3,4 -vs- State 1,2,3,5	SK1G00070247	5	1.19417e-65	1.67665e-63	RPL8	XP_015619844.1 60S ribosomal protein L8 [Oryza sativa Japonica Group]	Genetic Information Processing	Translation	ko03010//Ribosome	K02938	GO:0000315//organellar large ribosomal subunit;GO:0005840//ribosome;GO:0022625//cytosolic large ribosomal subunit	GO:0003735//structural constituent of ribosome	GO:0006412//translation
State 1,2,3,4 -vs- State 1,2,3,5	SK1G00070271	2	1.18107e-16	3.73587e-15	--	XP_015618615.1 uncharacterized protein LOC4352535 [Oryza sativa Japonica Group]	-	-	-	-	-	-	-
State 1,2,3,4 -vs- State 1,2,3,5	SK1G00070297	4	6.16186e-09	1.16303e-07	SAR1A	EAY83507.1 hypothetical protein OsI_38721 [Oryza sativa Indica Group]	Genetic Information Processing	Folding, sorting and degradation	ko04141//Protein processing in endoplasmic reticulum	K07953	GO:0005737//cytoplasm	GO:0003924//GTPase activity;GO:0005524//ATP binding;GO:0005525//GTP binding;GO:0019001//guanyl nucleotide binding;GO:0031683//G-protein beta/gamma-subunit complex binding;GO:0043022//ribosome binding;GO:0051539//4 iron, 4 sulfur cluster binding	GO:0006576//cellular biogenic amine metabolic process;GO:0007186//G-protein coupled receptor signaling pathway;GO:0008150//biological_process;GO:0008380//RNA splicing;GO:0042254//ribosome biogenesis;GO:0046336//ethanolamine catabolic process;GO:0051186//cofactor metabolic process
State 1,2,3,4 -vs- State 1,2,3,5	SK1G00070301	2	6.34242e-24	2.75086e-22	LOX2.1	XP_015620637.1 lipoxygenase 2.1, chloroplastic isoform X1 [Oryza sativa Japonica Group]	Metabolism;Metabolism;Metabolism;Metabolism	Global and overview maps;Global and overview maps;Lipid metabolism;Lipid metabolism	ko01100//Metabolic pathways;ko01110//Biosynthesis of secondary metabolites;ko00592//alpha-Linolenic acid metabolism;ko00591//Linoleic acid metabolism	K00454;K00454;K00454;K00454	-	GO:0005515//protein binding;GO:0016702//oxidoreductase activity, acting on single donors with incorporation of molecular oxygen, incorporation of two atoms of oxygen;GO:0046872//metal ion binding	GO:0055114//oxidation-reduction process
State 1,2,3,4 -vs- State 1,2,3,5	SK1G00070333	2	9.55142e-24	4.12756e-22	SAPK9	EAY83693.1 hypothetical protein OsI_38916 [Oryza sativa Indica Group]	Environmental Information Processing;Environmental Information Processing	Signal transduction;Signal transduction	ko04075//Plant hormone signal transduction;ko04016//MAPK signaling pathway - plant	K14498;K14498	-	GO:0004672//protein kinase activity;GO:0005524//ATP binding	GO:0006468//protein phosphorylation
State 1,2,3,4 -vs- State 1,2,3,5	SK1G00070347	3	1.53729e-11	3.59024e-10	NAT3	XP_015620184.1 nucleobase-ascorbate transporter 3 isoform X1 [Oryza sativa Japonica Group]	-	-	-	-	GO:0016020//membrane;GO:0016021//integral component of membrane	GO:0015205//nucleobase transmembrane transporter activity;GO:0022857//transmembrane transporter activity;GO:0042907//xanthine transmembrane transporter activity	GO:0015851//nucleobase transport;GO:0042906//xanthine transport;GO:0055085//transmembrane transport
State 1,2,3,4 -vs- State 1,2,3,5	SK1G00070349	1	1.1629e-11	2.74476e-10	NPY2	EAY83679.1 hypothetical protein OsI_38903 [Oryza sativa Indica Group]	-	-	-	-	-	GO:0005515//protein binding	-
State 1,2,3,4 -vs- State 1,2,3,5	SK1G00070354	1	2.33346e-22	9.49476e-21	CYP81Q32	XP_025877599.1 uncharacterized protein LOC9269725 [Oryza sativa Japonica Group]	-	-	-	-	-	GO:0005506//iron ion binding;GO:0016705//oxidoreductase activity, acting on paired donors, with incorporation or reduction of molecular oxygen;GO:0020037//heme binding;GO:0042626//ATPase activity, coupled to transmembrane movement of substances	GO:0044781//bacterial-type flagellum organization;GO:0055114//oxidation-reduction process
State 1,2,3,4 -vs- State 1,2,3,5	SK1G00070414	2	1.47084e-31	8.29321e-30	CML5	XP_015618906.1 calmodulin-like protein 5 [Oryza sativa Japonica Group]	Organismal Systems	Environmental adaptation	ko04626//Plant-pathogen interaction	K13448	GO:0030880//RNA polymerase complex	GO:0004553//hydrolase activity, hydrolyzing O-glycosyl compounds;GO:0005509//calcium ion binding;GO:0005515//protein binding	GO:0000272//polysaccharide catabolic process;GO:0006352//DNA-templated transcription, initiation
State 1,2,3,4 -vs- State 1,2,3,5	SK1G00070433	2	6.90625e-37	4.6027e-35	--	XP_015619020.1 glycine-rich protein 1 [Oryza sativa Japonica Group]	-	-	-	-	-	GO:0004857//enzyme inhibitor activity	-
State 1,2,3,4 -vs- State 1,2,3,5	SK1G00070434	2	2.65915e-15	7.85842e-14	--	XP_015619504.2 uncharacterized protein LOC4352711 [Oryza sativa Japonica Group]	-	-	-	-	-	GO:0004857//enzyme inhibitor activity	-
State 1,2,3,4 -vs- State 1,2,3,5	SK1G00070447	3	6.81283e-15	1.97394e-13	UAH	XP_015620061.1 probable ureidoglycolate hydrolase [Oryza sativa Japonica Group]	Metabolism;Metabolism	Global and overview maps;Nucleotide metabolism	ko01100//Metabolic pathways;ko00230//Purine metabolism	K18151;K18151	-	GO:0004180//carboxypeptidase activity;GO:0004222//metalloendopeptidase activity;GO:0008777//acetylornithine deacetylase activity;GO:0016787//hydrolase activity;GO:0047652//allantoate deiminase activity	GO:0006508//proteolysis;GO:0006592//ornithine biosynthetic process;GO:0009442//allantoin assimilation pathway
State 1,2,3,4 -vs- State 1,2,3,5	SK1G00070475	3	4.84245e-10	1.00947e-08	--	XP_015620323.1 uncharacterized protein LOC4352683 [Oryza sativa Japonica Group]	-	-	-	-	-	-	-
State 1,2,3,4 -vs- State 1,2,3,5	SK1G00070504	2	4.27081e-08	7.44394e-07	--	BAH95782.1 Os12g0609900 [Oryza sativa Japonica Group]	-	-	-	-	-	GO:0005515//protein binding	-
State 1,2,3,4 -vs- State 1,2,3,5	SK1G00070516	5	1.66367e-13	4.43669e-12	Os12g0611200	XP_015620393.1 DEAD-box ATP-dependent RNA helicase 9 [Oryza sativa Japonica Group]	-	-	-	-	GO:0005658//alpha DNA polymerase:primase complex;GO:0009380//excinuclease repair complex	GO:0003676//nucleic acid binding;GO:0003677//DNA binding;GO:0003678//DNA helicase activity;GO:0003688//DNA replication origin binding;GO:0003690//double-stranded DNA binding;GO:0003916//DNA topoisomerase activity;GO:0003917//DNA topoisomerase type I activity;GO:0004003//ATP-dependent DNA helicase activity;GO:0004386//helicase activity;GO:0004637//phosphoribosylamine-glycine ligase activity;GO:000…	GO:0006139//nucleobase-containing compound metabolic process;GO:0006260//DNA replication;GO:0006265//DNA topological change;GO:0006268//DNA unwinding involved in DNA replication;GO:0006281//DNA repair;GO:0006289//nucleotide-excision repair;GO:0006310//DNA recombination;GO:0009113//purine nucleobase biosynthetic process;GO:0043571//maintenance of CRISPR repeat elements
State 1,2,3,4 -vs- State 1,2,3,5	SK1G00070533	5	2.85193e-10	6.04091e-09	Nolc1	EAY83879.1 hypothetical protein OsI_39099 [Oryza sativa Indica Group]	-	-	-	-	-	-	-
State 1,2,3,4 -vs- State 1,2,3,5	SK1G00070544	3	1.40859e-11	3.30271e-10	Os12g0615400	XP_015619522.1 2-methyl-6-phytyl-1,4-hydroquinone methyltransferase 2, chloroplastic isoform X2 [Oryza sativa Japonica Group]	Metabolism;Metabolism;Metabolism	Global and overview maps;Global and overview maps;Metabolism of cofactors and vitamins	ko01100//Metabolic pathways;ko01110//Biosynthesis of secondary metabolites;ko00130//Ubiquinone and other terpenoid-quinone biosynthesis	K12502;K12502;K12502	GO:0005575//cellular_component;GO:0005737//cytoplasm	GO:0000179//rRNA (adenine-N6,N6-)-dimethyltransferase activity;GO:0008168//methyltransferase activity;GO:0008171//O-methyltransferase activity;GO:0008276//protein methyltransferase activity;GO:0008649//rRNA methyltransferase activity;GO:0008689//3-demethylubiquinone-9 3-O-methyltransferase activity;GO:0008757//S-adenosylmethionine-dependent methyltransferase activity;GO:0046025//precorrin-6Y C5,1…	GO:0000154//rRNA modification;GO:0006364//rRNA processing;GO:0006400//tRNA modification;GO:0006412//translation;GO:0006744//ubiquinone biosynthetic process;GO:0008152//metabolic process;GO:0008299//isoprenoid biosynthetic process;GO:0009102//biotin biosynthetic process;GO:0009234//menaquinone biosynthetic process;GO:0015995//chlorophyll biosynthetic process;GO:0018364//peptidyl-glutamine methylat…
State 1,2,3,4 -vs- State 1,2,3,5	SK1G00070556	2	4.99346e-160	2.46358e-157	CHX19	EEC69681.1 hypothetical protein OsI_39126 [Oryza sativa Indica Group]	-	-	-	-	GO:0016021//integral component of membrane	GO:0005451//monovalent cation:proton antiporter activity;GO:0015299//solute:proton antiporter activity	GO:0006812//cation transport;GO:0015992//proton transport;GO:0055085//transmembrane transport
State 1,2,3,4 -vs- State 1,2,3,5	SK1G00070577	1	4.46555e-08	7.75731e-07	IQD1	XP_015618401.1 protein IQ-DOMAIN 1 isoform X1 [Oryza sativa Japonica Group]	-	-	-	-	-	GO:0005515//protein binding	-
State 1,2,3,4 -vs- State 1,2,3,5	SK1G00070601	5	5.22205e-09	9.94092e-08	Os12g0624000	ABG22095.1 5-methyltetrahydropteroyltriglutamate-homocysteine methyltransferase, putative, expressed [Oryza sativa Japonica Group]	Metabolism;Metabolism;Metabolism;Metabolism;Metabolism	Global and overview maps;Global and overview maps;Global and overview maps;Amino acid metabolism;Metabolism of other amino acids	ko01100//Metabolic pathways;ko01110//Biosynthesis of secondary metabolites;ko01230//Biosynthesis of amino acids;ko00270//Cysteine and methionine metabolism;ko00450//Selenocompound metabolism	K00549;K00549;K00549;K00549;K00549	-	GO:0003871//5-methyltetrahydropteroyltriglutamate-homocysteine S-methyltransferase activity;GO:0004357//glutamate-cysteine ligase activity;GO:0008270//zinc ion binding	GO:0006750//glutathione biosynthetic process;GO:0008652//cellular amino acid biosynthetic process;GO:0009086//methionine biosynthetic process
State 1,2,3,4 -vs- State 1,2,3,5	SK1G00070607	2	1.05458e-26	5.01482e-25	RCS1	EAY83966.1 hypothetical protein OsI_39190 [Oryza sativa Indica Group]	Metabolism;Metabolism;Metabolism;Metabolism;Metabolism;Metabolism	Global and overview maps;Global and overview maps;Global and overview maps;Global and overview maps;Amino acid metabolism;Energy metabolism	ko01100//Metabolic pathways;ko01110//Biosynthesis of secondary metabolites;ko01200//Carbon metabolism;ko01230//Biosynthesis of amino acids;ko00270//Cysteine and methionine metabolism;ko00920//Sulfur metabolism	K01738;K01738;K01738;K01738;K01738;K01738	-	GO:0004122//cystathionine beta-synthase activity;GO:0004124//cysteine synthase activity;GO:0004794//L-threonine ammonia-lyase activity;GO:0004795//threonine synthase activity;GO:0008838//diaminopropionate ammonia-lyase activity;GO:0030170//pyridoxal phosphate binding	GO:0006535//cysteine biosynthetic process from serine;GO:0006549//isoleucine metabolic process;GO:0008152//metabolic process;GO:0009058//biosynthetic process;GO:0009088//threonine biosynthetic process;GO:0009097//isoleucine biosynthetic process;GO:0019344//cysteine biosynthetic process;GO:0042400//ectoine catabolic process
State 1,2,3,4 -vs- State 1,2,3,5	SK1G00070626	2	2.73681e-58	3.31798e-56	Os12g0628600	XP_015618555.1 thaumatin-like protein [Oryza sativa Japonica Group]	-	-	-	-	-	-	-
State 1,2,3,4 -vs- State 1,2,3,5	SK1G00070630	5	1.12491e-52	1.17873e-50	RPL44	NP_001151192.1 60S ribosomal protein L44 [Zea mays]	Genetic Information Processing	Translation	ko03010//Ribosome	K02929	GO:0005634//nucleus;GO:0005739//mitochondrion;GO:0005840//ribosome	GO:0003735//structural constituent of ribosome	GO:0006412//translation;GO:0045333//cellular respiration
State 1,2,3,4 -vs- State 1,2,3,5	SK1G00070644	3	4.87121e-12	1.17791e-10	--	KAB8118325.1 hypothetical protein EE612_061091 [Oryza sativa]	-	-	-	-	-	-	-
State 1,2,3,4 -vs- State 1,2,3,5	SK1G00070646	4	1.55104e-40	1.14307e-38	RBG7	AAB65412.1 glycine-rich protein [Oryza sativa Indica Group]	-	-	-	-	-	GO:0003676//nucleic acid binding	GO:0008380//RNA splicing
State 1,2,3,4 -vs- State 1,2,3,5	SK1G00070680	2	2.94527e-45	2.53322e-43	PAP2	RZC53871.1 hypothetical protein C5167_012728 [Papaver somniferum]	-	-	-	-	-	GO:0003993//acid phosphatase activity;GO:0005515//protein binding;GO:0016787//hydrolase activity;GO:0046872//metal ion binding	-
State 1,2,3,4 -vs- State 1,2,3,5	SK1G00070722	5	2.64198e-11	6.10594e-10	TIF3B1	EEC67477.1 hypothetical protein OsI_34716 [Oryza sativa Indica Group]	Genetic Information Processing	Translation	ko03013//RNA transport	K03253	GO:0030288//outer membrane-bounded periplasmic space	GO:0003676//nucleic acid binding;GO:0005215//transporter activity	GO:0006810//transport;GO:0008380//RNA splicing;GO:0009405//pathogenesis
State 1,2,3,4 -vs- State 1,2,3,5	SK1G00070746	4	5.60153e-10	1.16225e-08	BOU	EAY79612.1 hypothetical protein OsI_34753 [Oryza sativa Indica Group]	Genetic Information Processing;Genetic Information Processing	Translation;Translation	ko03013//RNA transport;ko03008//Ribosome biogenesis in eukaryotes	K07562;K07562	-	-	-
State 1,2,3,4 -vs- State 1,2,3,5	SK1G00070751	4	1.08585e-11	2.56802e-10	--	XP_015614789.1 uncharacterized protein LOC4349481 [Oryza sativa Japonica Group]	-	-	-	-	-	GO:0008270//zinc ion binding	-
State 1,2,3,4 -vs- State 1,2,3,5	SK1G00070779	2	4.00322e-19	1.43784e-17	RCD1	EAY79639.1 hypothetical protein OsI_34783 [Oryza sativa Indica Group]	-	-	-	-	-	GO:0003950//NAD+ ADP-ribosyltransferase activity	-
State 1,2,3,4 -vs- State 1,2,3,5	SK1G00070789	2	6.50428e-21	2.51514e-19	At5g17010	XP_015614520.1 D-xylose-proton symporter-like 2 [Oryza sativa Japonica Group]	-	-	-	-	GO:0005887//integral component of plasma membrane;GO:0016020//membrane;GO:0016021//integral component of membrane	GO:0008028//monocarboxylic acid transmembrane transporter activity;GO:0015114//phosphate ion transmembrane transporter activity;GO:0015238//drug transmembrane transporter activity;GO:0015295//solute:proton symporter activity;GO:0015307//drug:proton antiporter activity;GO:0022857//transmembrane transporter activity;GO:0042910//xenobiotic transporter activity;GO:0051119//sugar transmembrane transpo…	GO:0006810//transport;GO:0006817//phosphate ion transport;GO:0006855//drug transmembrane transport;GO:0008643//carbohydrate transport;GO:0015718//monocarboxylic acid transport;GO:0015893//drug transport;GO:0042493//response to drug;GO:0042908//xenobiotic transport;GO:0055085//transmembrane transport
State 1,2,3,4 -vs- State 1,2,3,5	SK1G00070792	5	4.13426e-08	7.21303e-07	--	XP_015613080.1 uncharacterized protein LOC4349515 [Oryza sativa Japonica Group]	-	-	-	-	GO:0000315//organellar large ribosomal subunit;GO:0005840//ribosome;GO:0022625//cytosolic large ribosomal subunit	GO:0003735//structural constituent of ribosome	GO:0006412//translation
State 1,2,3,4 -vs- State 1,2,3,5	SK1G00070802	4	1.17643e-12	2.96376e-11	--	XP_015614477.1 uncharacterized protein LOC4349524 [Oryza sativa Japonica Group]	-	-	-	-	-	-	-
State 1,2,3,4 -vs- State 1,2,3,5	SK1G00070815	1	2.09249e-20	7.85725e-19	POX2	XP_015612712.1 proline dehydrogenase 2, mitochondrial [Oryza sativa Japonica Group]	Metabolism;Metabolism;Metabolism	Global and overview maps;Global and overview maps;Amino acid metabolism	ko01100//Metabolic pathways;ko01110//Biosynthesis of secondary metabolites;ko00330//Arginine and proline metabolism	K00318;K00318;K00318	-	GO:0016740//transferase activity	-
State 1,2,3,4 -vs- State 1,2,3,5	SK1G00070825	4	1.02033e-18	3.5779e-17	At4g12490	EAY79459.1 hypothetical protein OsI_34590 [Oryza sativa Indica Group]	-	-	-	-	-	-	-
State 1,2,3,4 -vs- State 1,2,3,5	SK1G00070864	2	4.12418e-30	2.1931e-28	2ODD11	AAL79783.1 putative ethylene-forming enzyme [Oryza sativa Japonica Group]	-	-	-	-	-	GO:0016491//oxidoreductase activity	GO:0055114//oxidation-reduction process
State 1,2,3,4 -vs- State 1,2,3,5	SK1G00070907	5	1.25874e-17	4.21025e-16	RPL27C	XP_015612809.1 60S ribosomal protein L27-3 [Oryza sativa Japonica Group]	Genetic Information Processing	Translation	ko03010//Ribosome	K02901	GO:0005840//ribosome	GO:0003735//structural constituent of ribosome	GO:0006412//translation
State 1,2,3,4 -vs- State 1,2,3,5	SK1G00070913	1	4.17067e-10	8.73014e-09	BAM3	XP_015614593.1 beta-amylase 3, chloroplastic [Oryza sativa Japonica Group]	Metabolism;Metabolism;Metabolism	Global and overview maps;Global and overview maps;Carbohydrate metabolism	ko01100//Metabolic pathways;ko01110//Biosynthesis of secondary metabolites;ko00500//Starch and sucrose metabolism	K01177;K01177;K01177	-	GO:0016161//beta-amylase activity	GO:0000272//polysaccharide catabolic process
State 1,2,3,4 -vs- State 1,2,3,5	SK1G00070930	3	8.42791e-17	2.68499e-15	CPN10-1	XP_015613059.1 10 kDa chaperonin 1, chloroplastic [Oryza sativa Japonica Group]	-	-	-	-	-	GO:0005524//ATP binding;GO:0016887//ATPase activity	GO:0006457//protein folding
State 1,2,3,4 -vs- State 1,2,3,5	SK1G00070967	4	3.10212e-12	7.59432e-11	MPK6	XP_015615011.1 mitogen-activated protein kinase 6 [Oryza sativa Japonica Group]	-	-	-	-	-	GO:0004672//protein kinase activity;GO:0005524//ATP binding	GO:0006468//protein phosphorylation
State 1,2,3,4 -vs- State 1,2,3,5	SK1G00070975	2	1.12419e-18	3.93046e-17	SCE1	XP_015614559.1 SUMO-conjugating enzyme SCE1 [Oryza sativa Japonica Group]	Genetic Information Processing;Genetic Information Processing	Translation;Folding, sorting and degradation	ko03013//RNA transport;ko04120//Ubiquitin mediated proteolysis	K10577;K10577	-	-	-
State 1,2,3,4 -vs- State 1,2,3,5	SK1G00070977	2	1.09406e-21	4.33257e-20	--	EAY79339.1 hypothetical protein OsI_34469 [Oryza sativa Indica Group]	-	-	-	-	-	-	-
State 1,2,3,4 -vs- State 1,2,3,5	SK1G00071020	2	1.04551e-224	9.77328e-222	Cht8	EAY79390.1 hypothetical protein OsI_34517 [Oryza sativa Indica Group]	Metabolism;Environmental Information Processing;Metabolism	Global and overview maps;Signal transduction;Carbohydrate metabolism	ko01100//Metabolic pathways;ko04016//MAPK signaling pathway - plant;ko00520//Amino sugar and nucleotide sugar metabolism	K20547;K20547;K20547	-	GO:0004568//chitinase activity	GO:0006032//chitin catabolic process;GO:0016998//cell wall macromolecule catabolic process
State 1,2,3,4 -vs- State 1,2,3,5	SK1G00071023	5	1.80518e-09	3.59429e-08	GSTF12	XP_015613408.1 glutathione S-transferase APIC [Oryza sativa Japonica Group]	Metabolism;Metabolism	Global and overview maps;Metabolism of other amino acids	ko01100//Metabolic pathways;ko00480//Glutathione metabolism	K00799;K00799	-	GO:0005515//protein binding;GO:0016034//maleylacetoacetate isomerase activity	GO:0006559//L-phenylalanine catabolic process;GO:0006572//tyrosine catabolic process;GO:0006749//glutathione metabolic process
State 1,2,3,4 -vs- State 1,2,3,5	SK1G00071088	3	9.39338e-09	1.75248e-07	CYP89A2	EAY79199.1 hypothetical protein OsI_34311 [Oryza sativa Indica Group]	Metabolism;Metabolism	Global and overview maps;Amino acid metabolism	ko01100//Metabolic pathways;ko00380//Tryptophan metabolism	K07408;K07408	-	GO:0005506//iron ion binding;GO:0016705//oxidoreductase activity, acting on paired donors, with incorporation or reduction of molecular oxygen;GO:0020037//heme binding	GO:0055114//oxidation-reduction process
State 1,2,3,4 -vs- State 1,2,3,5	SK1G00071091	3	3.66797e-13	9.54533e-12	GDCSH	XP_015613006.1 glycine cleavage system H protein, mitochondrial [Oryza sativa Japonica Group]	Metabolism;Metabolism;Metabolism;Metabolism;Metabolism	Global and overview maps;Global and overview maps;Global and overview maps;Carbohydrate metabolism;Amino acid metabolism	ko01100//Metabolic pathways;ko01110//Biosynthesis of secondary metabolites;ko01200//Carbon metabolism;ko00630//Glyoxylate and dicarboxylate metabolism;ko00260//Glycine, serine and threonine metabolism	K02437;K02437;K02437;K02437;K02437	GO:0045254//pyruvate dehydrogenase complex	GO:0003824//catalytic activity;GO:0004742//dihydrolipoyllysine-residue acetyltransferase activity	GO:0006086//acetyl-CoA biosynthetic process from pyruvate;GO:0019464//glycine decarboxylation via glycine cleavage system
State 1,2,3,4 -vs- State 1,2,3,5	SK1G00071098	2	7.84641e-56	9.04935e-54	GTL1	KAF2914396.1 hypothetical protein DAI22_10g159300 [Oryza sativa Japonica Group]	-	-	-	-	GO:0005681//spliceosomal complex	GO:0043767//pyrrolysyl-tRNA synthetase activity	GO:0000398//mRNA splicing, via spliceosome;GO:0006418//tRNA aminoacylation for protein translation
State 1,2,3,4 -vs- State 1,2,3,5	SK1G00071104	5	1.27536e-12	3.20164e-11	MGL	KAB8113335.1 hypothetical protein EE612_052304 [Oryza sativa]	Metabolism;Metabolism;Metabolism	Global and overview maps;Amino acid metabolism;Metabolism of other amino acids	ko01100//Metabolic pathways;ko00270//Cysteine and methionine metabolism;ko00450//Selenocompound metabolism	K01761;K01761;K01761	-	GO:0003824//catalytic activity;GO:0003961//O-acetylhomoserine aminocarboxypropyltransferase activity;GO:0004121//cystathionine beta-lyase activity;GO:0004124//cysteine synthase activity;GO:0008710//8-amino-7-oxononanoate synthase activity;GO:0016765//transferase activity, transferring alkyl or aryl (other than methyl) groups;GO:0016835//carbon-oxygen lyase activity;GO:0018826//methionine gamma-ly…	GO:0008652//cellular amino acid biosynthetic process;GO:0009058//biosynthetic process;GO:0009086//methionine biosynthetic process;GO:0009087//methionine catabolic process;GO:0009093//cysteine catabolic process;GO:0009102//biotin biosynthetic process;GO:0016226//iron-sulfur cluster assembly;GO:0019344//cysteine biosynthetic process;GO:0019346//transsulfuration;GO:0019413//acetate biosynthetic proc…
State 1,2,3,4 -vs- State 1,2,3,5	SK1G00071111	2	1.01328e-08	1.88351e-07	fray2	XP_015614598.1 germinal center kinase 1 [Oryza sativa Japonica Group]	-	-	-	-	-	GO:0004672//protein kinase activity;GO:0005524//ATP binding;GO:0016709//oxidoreductase activity, acting on paired donors, with incorporation or reduction of molecular oxygen, NAD(P)H as one donor, and incorporation of one atom of oxygen	GO:0006468//protein phosphorylation;GO:0006744//ubiquinone biosynthetic process
State 1,2,3,4 -vs- State 1,2,3,5	SK1G00071117	5	3.11798e-09	6.0889e-08	--	KAB8113352.1 hypothetical protein EE612_052330 [Oryza sativa]	-	-	-	-	-	GO:0005515//protein binding	-
State 1,2,3,4 -vs- State 1,2,3,5	SK1G00071126	2	2.24273e-85	4.85769e-83	ADF10	XP_015613388.1 actin-depolymerizing factor 10 isoform X2 [Oryza sativa Japonica Group]	-	-	-	-	-	GO:0003779//actin binding	-
State 1,2,3,4 -vs- State 1,2,3,5	SK1G00071154	5	5.61888e-11	1.26325e-09	SBT1.2	EAY79268.1 hypothetical protein OsI_34383 [Oryza sativa Indica Group]	-	-	-	-	-	GO:0008236//serine-type peptidase activity	GO:0006508//proteolysis;GO:0009306//protein secretion
State 1,2,3,4 -vs- State 1,2,3,5	SK1G00071160	4	1.64906e-23	7.0491e-22	GSTU17	XP_024317192.1 LOW QUALITY PROTEIN: uncharacterized protein LOC100840442 [Brachypodium distachyon]	Metabolism;Metabolism	Global and overview maps;Metabolism of other amino acids	ko01100//Metabolic pathways;ko00480//Glutathione metabolism	K00799;K00799	-	GO:0005515//protein binding;GO:0015035//protein disulfide oxidoreductase activity;GO:0016034//maleylacetoacetate isomerase activity	GO:0006559//L-phenylalanine catabolic process;GO:0006572//tyrosine catabolic process;GO:0006749//glutathione metabolic process;GO:0006790//sulfur compound metabolic process;GO:0042965//glutaredoxin biosynthetic process;GO:0045454//cell redox homeostasis;GO:0055114//oxidation-reduction process
State 1,2,3,4 -vs- State 1,2,3,5	SK1G00071164	4	2.22077e-33	1.33479e-31	GSTU6	EAY79285.1 hypothetical protein OsI_34411 [Oryza sativa Indica Group]	Metabolism;Metabolism	Global and overview maps;Metabolism of other amino acids	ko01100//Metabolic pathways;ko00480//Glutathione metabolism	K00799;K00799	-	GO:0005515//protein binding;GO:0016034//maleylacetoacetate isomerase activity	GO:0006559//L-phenylalanine catabolic process;GO:0006572//tyrosine catabolic process;GO:0006749//glutathione metabolic process
State 1,2,3,4 -vs- State 1,2,3,5	SK1G00071166	1	7.90269e-272	1.00257e-268	GSTU6	XP_015613723.1 uncharacterized protein LOC4349190 [Oryza sativa Japonica Group]	Metabolism;Metabolism	Global and overview maps;Metabolism of other amino acids	ko01100//Metabolic pathways;ko00480//Glutathione metabolism	K00799;K00799	-	GO:0005515//protein binding;GO:0016034//maleylacetoacetate isomerase activity	GO:0006559//L-phenylalanine catabolic process;GO:0006572//tyrosine catabolic process;GO:0006749//glutathione metabolic process
State 1,2,3,4 -vs- State 1,2,3,5	SK1G00071178	2	0	0	--	EEC67221.1 hypothetical protein OsI_34133 [Oryza sativa Indica Group]	-	-	-	-	GO:0005737//cytoplasm	GO:0051540//metal cluster binding	GO:0008150//biological_process
State 1,2,3,4 -vs- State 1,2,3,5	SK1G00071179	2	4.85045e-40	3.51628e-38	--	EAY79025.1 hypothetical protein OsI_34134 [Oryza sativa Indica Group]	-	-	-	-	-	GO:0008962//phosphatidylglycerophosphatase activity	GO:0006629//lipid metabolic process
State 1,2,3,4 -vs- State 1,2,3,5	SK1G00071202	2	1.49408e-08	2.73289e-07	--	XP_015613572.1 uncharacterized protein LOC4348991 [Oryza sativa Japonica Group]	-	-	-	-	-	-	-
State 1,2,3,4 -vs- State 1,2,3,5	SK1G00071225	3	1.47256e-20	5.57065e-19	PORB	KAB8113168.1 hypothetical protein EE612_052092 [Oryza sativa]	Metabolism;Metabolism;Metabolism	Global and overview maps;Global and overview maps;Metabolism of cofactors and vitamins	ko01100//Metabolic pathways;ko01110//Biosynthesis of secondary metabolites;ko00860//Porphyrin and chlorophyll metabolism	K00218;K00218;K00218	-	GO:0004316//3-oxoacyl-[acyl-carrier-protein] reductase (NADPH) activity;GO:0004757//sepiapterin reductase activity;GO:0008667//2,3-dihydro-2,3-dihydroxybenzoate dehydrogenase activity;GO:0008678//2-deoxy-D-gluconate 3-dehydrogenase activity;GO:0016491//oxidoreductase activity;GO:0016630//protochlorophyllide reductase activity;GO:0050662//coenzyme binding;GO:0051287//NAD binding	GO:0000272//polysaccharide catabolic process;GO:0006633//fatty acid biosynthetic process;GO:0006729//tetrahydrobiopterin biosynthetic process;GO:0015995//chlorophyll biosynthetic process;GO:0055114//oxidation-reduction process
State 1,2,3,4 -vs- State 1,2,3,5	SK1G00071232	3	6.06338e-38	4.12612e-36	BC1L9	KAB8113178.1 hypothetical protein EE612_052108 [Oryza sativa]	-	-	-	-	GO:0031225//anchored component of membrane	-	GO:0010215//cellulose microfibril organization
State 1,2,3,4 -vs- State 1,2,3,5	SK1G00071236	2	1.00525e-09	2.04516e-08	MT1988	OTG29590.1 putative epoxide hydrolase [Helianthus annuus]	-	-	-	-	-	GO:0003674//molecular_function;GO:0004414//homoserine O-acetyltransferase activity;GO:0008236//serine-type peptidase activity;GO:0016787//hydrolase activity;GO:0047570//3-oxoadipate enol-lactonase activity;GO:0047746//chlorophyllase activity;GO:0070205//2-succinyl-6-hydroxy-2,4-cyclohexadiene-1-carboxylate synthase activity	GO:0006508//proteolysis;GO:0009086//methionine biosynthetic process;GO:0009234//menaquinone biosynthetic process;GO:0015979//photosynthesis;GO:0015996//chlorophyll catabolic process;GO:0030163//protein catabolic process;GO:0042952//beta-ketoadipate pathway
State 1,2,3,4 -vs- State 1,2,3,5	SK1G00071249	5	5.4589e-09	1.03807e-07	rpsR	KAB8113204.1 hypothetical protein EE612_052141 [Oryza sativa]	-	-	-	-	GO:0000314//organellar small ribosomal subunit;GO:0005840//ribosome;GO:0022627//cytosolic small ribosomal subunit	GO:0003735//structural constituent of ribosome	GO:0006412//translation
State 1,2,3,4 -vs- State 1,2,3,5	SK1G00071256	1	3.84675e-11	8.77613e-10	At2g23790	EAY79105.1 hypothetical protein OsI_34211 [Oryza sativa Indica Group]	-	-	-	-	-	-	-
State 1,2,3,4 -vs- State 1,2,3,5	SK1G00071260	5	4.36291e-08	7.5933e-07	--	XP_015612875.1 thylakoid lumenal 17.4 kDa protein, chloroplastic [Oryza sativa Japonica Group]	-	-	-	-	-	-	-
State 1,2,3,4 -vs- State 1,2,3,5	SK1G00071263	4	3.4905e-14	9.72466e-13	OsI_033071	EAY79112.1 hypothetical protein OsI_34217 [Oryza sativa Indica Group]	Metabolism;Metabolism;Metabolism	Global and overview maps;Global and overview maps;Metabolism of cofactors and vitamins	ko01100//Metabolic pathways;ko01110//Biosynthesis of secondary metabolites;ko00860//Porphyrin and chlorophyll metabolism	K02492;K02492;K02492	GO:0005737//cytoplasm	GO:0004616//phosphogluconate dehydrogenase (decarboxylating) activity;GO:0004764//shikimate 3-dehydrogenase (NADP+) activity;GO:0008641//small protein activating enzyme activity;GO:0008839//4-hydroxy-tetrahydrodipicolinate reductase;GO:0008883//glutamyl-tRNA reductase activity;GO:0016491//oxidoreductase activity;GO:0016616//oxidoreductase activity, acting on the CH-OH group of donors, NAD or NADP…	GO:0006098//pentose-phosphate shunt;GO:0006779//porphyrin-containing compound biosynthetic process;GO:0006813//potassium ion transport;GO:0008652//cellular amino acid biosynthetic process;GO:0009058//biosynthetic process;GO:0009089//lysine biosynthetic process via diaminopimelate;GO:0009228//thiamine biosynthetic process;GO:0009423//chorismate biosynthetic process;GO:0033014//tetrapyrrole biosynt…
State 1,2,3,4 -vs- State 1,2,3,5	SK1G00071264	4	5.59555e-30	2.95782e-28	MSBP2	XP_015614353.1 membrane steroid-binding protein 2-like [Oryza sativa Japonica Group]	-	-	-	-	GO:0005840//ribosome	GO:0003735//structural constituent of ribosome	GO:0006412//translation
State 1,2,3,4 -vs- State 1,2,3,5	SK1G00071265	3	1.40676e-16	4.43006e-15	--	BAC84393.1 hypothetical protein [Oryza sativa Japonica Group]	-	-	-	-	-	-	-
State 1,2,3,4 -vs- State 1,2,3,5	SK1G00071281	2	1.96144e-131	7.49186e-129	--	EAY79133.1 hypothetical protein OsI_34240 [Oryza sativa Indica Group]	-	-	-	-	-	-	-
State 1,2,3,4 -vs- State 1,2,3,5	SK1G00071282	1	1.42335e-85	3.10186e-83	LTP-2	EAY79134.1 hypothetical protein OsI_34241 [Oryza sativa Indica Group]	-	-	-	-	-	-	-
State 1,2,3,4 -vs- State 1,2,3,5	SK1G00071311	1	1.32405e-19	4.83382e-18	--	-	-	-	-	-	-	-	-
State 1,2,3,4 -vs- State 1,2,3,5	SK1G00071328	5	1.05651e-13	2.86264e-12	BTF3	EEC67196.1 hypothetical protein OsI_34071 [Oryza sativa Indica Group]	-	-	-	-	-	-	-
State 1,2,3,4 -vs- State 1,2,3,5	SK1G00071367	2	3.23001e-22	1.30531e-20	VIII-1	XP_015614390.1 myosin-1 [Oryza sativa Japonica Group]	-	-	-	-	GO:0005577//fibrinogen complex;GO:0016459//myosin complex	GO:0003774//motor activity;GO:0003924//GTPase activity;GO:0005102//receptor binding;GO:0005515//protein binding;GO:0005524//ATP binding;GO:0005525//GTP binding;GO:0008565//protein transporter activity;GO:0008855//exodeoxyribonuclease VII activity;GO:0016301//kinase activity	GO:0007059//chromosome segregation;GO:0007094//mitotic spindle assembly checkpoint;GO:0030168//platelet activation;GO:0030253//protein secretion by the type I secretion system;GO:0030261//chromosome condensation;GO:0051258//protein polymerization
State 1,2,3,4 -vs- State 1,2,3,5	SK1G00071368	1	1.95114e-16	6.10108e-15	At5g23370	XP_015612926.1 putative GEM-like protein 8 [Oryza sativa Japonica Group]	-	-	-	-	-	-	-
State 1,2,3,4 -vs- State 1,2,3,5	SK1G00071395	5	1.05292e-15	3.15095e-14	Os10g0478200	XP_015614294.1 malate dehydrogenase, cytoplasmic [Oryza sativa Japonica Group]	Metabolism;Metabolism;Metabolism;Metabolism;Metabolism;Metabolism;Metabolism;Metabolism	Global and overview maps;Global and overview maps;Global and overview maps;Amino acid metabolism;Carbohydrate metabolism;Energy metabolism;Carbohydrate metabolism;Carbohydrate metabolism	ko01100//Metabolic pathways;ko01110//Biosynthesis of secondary metabolites;ko01200//Carbon metabolism;ko00270//Cysteine and methionine metabolism;ko00620//Pyruvate metabolism;ko00710//Carbon fixation in photosynthetic organisms;ko00630//Glyoxylate and dicarboxylate metabolism;ko00020//Citrate cycle (TCA cycle)	K00025;K00025;K00025;K00025;K00025;K00025;K00025;K00025	GO:0005737//cytoplasm	GO:0004459//L-lactate dehydrogenase activity;GO:0016491//oxidoreductase activity;GO:0016616//oxidoreductase activity, acting on the CH-OH group of donors, NAD or NADP as acceptor;GO:0030060//L-malate dehydrogenase activity	GO:0006099//tricarboxylic acid cycle;GO:0055114//oxidation-reduction process
State 1,2,3,4 -vs- State 1,2,3,5	SK1G00071417	2	1.89998e-43	1.5235e-41	FAO2	XP_015613149.1 long-chain-alcohol oxidase FAO1 [Oryza sativa Japonica Group]	-	-	-	-	GO:0009331//glycerol-3-phosphate dehydrogenase complex;GO:0009342//glutamate synthase complex (NADPH)	GO:0003824//catalytic activity;GO:0004148//dihydrolipoyl dehydrogenase activity;GO:0004368//glycerol-3-phosphate dehydrogenase activity;GO:0005092//GDP-dissociation inhibitor activity;GO:0008677//2-dehydropantoate 2-reductase activity;GO:0008689//3-demethylubiquinone-9 3-O-methyltransferase activity;GO:0008734//L-aspartate oxidase activity;GO:0008767//UDP-galactopyranose mutase activity;GO:000881…	GO:0006071//glycerol metabolic process;GO:0006096//glycolytic process;GO:0006537//glutamate biosynthetic process;GO:0006631//fatty acid metabolic process;GO:0006744//ubiquinone biosynthetic process;GO:0006805//xenobiotic metabolic process;GO:0007264//small GTPase mediated signal transduction;GO:0009228//thiamine biosynthetic process;GO:0009273//peptidoglycan-based cell wall biogenesis;GO:0009398/…
State 1,2,3,4 -vs- State 1,2,3,5	SK1G00071432	3	6.71965e-11	1.49934e-09	CYN	XP_015614137.1 cyanate hydratase [Oryza sativa Japonica Group]	Metabolism;Metabolism	Global and overview maps;Energy metabolism	ko01100//Metabolic pathways;ko00910//Nitrogen metabolism	K01725;K01725	-	GO:0008824//cyanate hydratase activity	GO:0009439//cyanate metabolic process;GO:0009636//response to toxic substance
State 1,2,3,4 -vs- State 1,2,3,5	SK1G00071463	5	5.16806e-138	2.11011e-135	RPL23A	NP_001132424.1 60S ribosomal protein L23-like [Zea mays]	Genetic Information Processing	Translation	ko03010//Ribosome	K02894	GO:0000315//organellar large ribosomal subunit;GO:0005840//ribosome;GO:0022625//cytosolic large ribosomal subunit	GO:0003735//structural constituent of ribosome	GO:0006412//translation
State 1,2,3,4 -vs- State 1,2,3,5	SK1G00071465	5	1.06527e-10	2.331e-09	PRP19	KAB8112931.1 hypothetical protein EE612_051735 [Oryza sativa]	Genetic Information Processing;Genetic Information Processing	Transcription;Folding, sorting and degradation	ko03040//Spliceosome;ko04120//Ubiquitin mediated proteolysis	K10599;K10599	-	GO:0004842//ubiquitin-protein transferase activity;GO:0005515//protein binding;GO:0008270//zinc ion binding	GO:0016567//protein ubiquitination
State 1,2,3,4 -vs- State 1,2,3,5	SK1G00071469	4	1.65427e-13	4.41496e-12	--	XP_025876617.1 uncharacterized protein LOC112936645 [Oryza sativa Japonica Group]	-	-	-	-	-	-	-
State 1,2,3,4 -vs- State 1,2,3,5	SK1G00071471	5	3.76846e-80	7.12038e-78	RPL21E	XP_015614095.1 60S ribosomal protein L21-2 [Oryza sativa Japonica Group]	Genetic Information Processing	Translation	ko03010//Ribosome	K02889	GO:0005840//ribosome	GO:0003735//structural constituent of ribosome;GO:0016740//transferase activity	GO:0006412//translation
State 1,2,3,4 -vs- State 1,2,3,5	SK1G00071498	3	5.49147e-09	1.0437e-07	PYG7	XP_015614178.1 tetratricopeptide repeat domain-containing protein PYG7, chloroplastic isoform X4 [Oryza sativa Japonica Group]	Metabolism	Energy metabolism	ko00195//Photosynthesis	K02717	-	GO:0005515//protein binding	-
State 1,2,3,4 -vs- State 1,2,3,5	SK1G00071515	2	1.92129e-10	4.13124e-09	PED1	XP_015614832.1 3-ketoacyl-CoA thiolase 2, peroxisomal [Oryza sativa Japonica Group]	Metabolism;Metabolism;Cellular Processes;Metabolism;Metabolism;Metabolism;Metabolism;Metabolism	Global and overview maps;Global and overview maps;Transport and catabolism;Global and overview maps;Lipid metabolism;Lipid metabolism;Amino acid metabolism;Lipid metabolism	ko01100//Metabolic pathways;ko01110//Biosynthesis of secondary metabolites;ko04146//Peroxisome;ko01212//Fatty acid metabolism;ko00592//alpha-Linolenic acid metabolism;ko00071//Fatty acid degradation;ko00280//Valine, leucine and isoleucine degradation;ko01040//Biosynthesis of unsaturated fatty acids	K07513;K07513;K07513;K07513;K07513;K07513;K07513;K07513	-	GO:0003985//acetyl-CoA C-acetyltransferase activity;GO:0003988//acetyl-CoA C-acyltransferase activity;GO:0016747//transferase activity, transferring acyl groups other than amino-acyl groups;GO:0033817//beta-ketoacyl-acyl-carrier-protein synthase II activity	GO:0006631//fatty acid metabolic process;GO:0006633//fatty acid biosynthetic process;GO:0009062//fatty acid catabolic process
State 1,2,3,4 -vs- State 1,2,3,5	SK1G00071554	5	1.27678e-14	3.66053e-13	GRP0.9	EEC84126.1 hypothetical protein OsI_30463 [Oryza sativa Indica Group]	-	-	-	-	-	-	-
State 1,2,3,4 -vs- State 1,2,3,5	SK1G00071594	2	2.86835e-17	9.39939e-16	PHT1-8	XP_015614122.1 probable inorganic phosphate transporter 1-8 [Oryza sativa Japonica Group]	-	-	-	-	GO:0005887//integral component of plasma membrane;GO:0016021//integral component of membrane	GO:0008028//monocarboxylic acid transmembrane transporter activity;GO:0015114//phosphate ion transmembrane transporter activity;GO:0015238//drug transmembrane transporter activity;GO:0015295//solute:proton symporter activity;GO:0022857//transmembrane transporter activity;GO:0042910//xenobiotic transporter activity;GO:0051119//sugar transmembrane transporter activity	GO:0006810//transport;GO:0006817//phosphate ion transport;GO:0008643//carbohydrate transport;GO:0015718//monocarboxylic acid transport;GO:0015893//drug transport;GO:0042908//xenobiotic transport;GO:0055085//transmembrane transport
State 1,2,3,4 -vs- State 1,2,3,5	SK1G00071604	2	1.94462e-08	3.51895e-07	ABCG25	EEC67046.1 hypothetical protein OsI_33789 [Oryza sativa Indica Group]	-	-	-	-	GO:0005575//cellular_component;GO:0005887//integral component of plasma membrane;GO:0009380//excinuclease repair complex;GO:0009898//cytoplasmic side of plasma membrane;GO:0016020//membrane;GO:0016021//integral component of membrane;GO:0043190//ATP-binding cassette (ABC) transporter complex;GO:0055051//ATP-binding cassette (ABC) transporter complex, integrated substrate binding;GO:0055052//ATP-bi…	GO:0003723//RNA binding;GO:0003724//RNA helicase activity;GO:0003924//GTPase activity;GO:0005260//channel-conductance-controlling ATPase activity;GO:0005319//lipid transporter activity;GO:0005524//ATP binding;GO:0005525//GTP binding;GO:0008565//protein transporter activity;GO:0009381//excinuclease ABC activity;GO:0015220//choline transmembrane transporter activity;GO:0015221//lipopolysaccharide t…	GO:0000910//cytokinesis;GO:0002949//tRNA threonylcarbamoyladenosine modification;GO:0006289//nucleotide-excision repair;GO:0006810//transport;GO:0006817//phosphate ion transport;GO:0006824//cobalt ion transport;GO:0006869//lipid transport;GO:0007601//visual perception;GO:0008150//biological_process;GO:0008272//sulfate transport;GO:0015675//nickel cation transport;GO:0015689//molybdate ion transpo…
State 1,2,3,4 -vs- State 1,2,3,5	SK1G00071605	2	1.20652e-55	1.37807e-53	PCRK2	EEC67045.1 hypothetical protein OsI_33788 [Oryza sativa Indica Group]	-	-	-	-	-	GO:0004672//protein kinase activity;GO:0005524//ATP binding	GO:0006468//protein phosphorylation
State 1,2,3,4 -vs- State 1,2,3,5	SK1G00071705	4	2.25861e-08	4.05204e-07	ARD4	EAY78509.1 hypothetical protein OsI_33605 [Oryza sativa Indica Group]	Metabolism;Metabolism	Global and overview maps;Amino acid metabolism	ko01100//Metabolic pathways;ko00270//Cysteine and methionine metabolism	K08967;K08967	-	GO:0000334//3-hydroxyanthranilate 3,4-dioxygenase activity;GO:0005506//iron ion binding;GO:0010309//acireductone dioxygenase [iron(II)-requiring] activity;GO:0047869//dimethylpropiothetin dethiomethylase activity	GO:0006355//regulation of transcription, DNA-templated;GO:0055114//oxidation-reduction process
State 1,2,3,4 -vs- State 1,2,3,5	SK1G00071713	1	1.69139e-63	2.28448e-61	ACA7	XP_015613068.1 calcium-transporting ATPase 7, plasma membrane-type [Oryza sativa Japonica Group]	-	-	-	-	GO:0031004//potassium ion-transporting ATPase complex	GO:0004008//copper-exporting ATPase activity;GO:0004647//phosphoserine phosphatase activity;GO:0005375//copper ion transmembrane transporter activity;GO:0005388//calcium-transporting ATPase activity;GO:0008556//potassium-transporting ATPase activity;GO:0008967//phosphoglycolate phosphatase activity;GO:0015434//cadmium-transporting ATPase activity;GO:0015444//magnesium-importing ATPase activity;GO…	GO:0006545//glycine biosynthetic process;GO:0006564//L-serine biosynthetic process;GO:0006813//potassium ion transport;GO:0006816//calcium ion transport;GO:0006825//copper ion transport;GO:0008152//metabolic process;GO:0015691//cadmium ion transport;GO:0015693//magnesium ion transport;GO:0030001//metal ion transport
State 1,2,3,4 -vs- State 1,2,3,5	SK1G00071721	2	0	0	--	TVU31060.1 hypothetical protein EJB05_22727, partial [Eragrostis curvula]	-	-	-	-	-	-	GO:0005975//carbohydrate metabolic process
State 1,2,3,4 -vs- State 1,2,3,5	SK1G00071747	5	5.69597e-54	6.2256e-52	RPS17C	XP_015614780.1 40S ribosomal protein S17-3 [Oryza sativa Japonica Group]	Genetic Information Processing	Translation	ko03010//Ribosome	K02962	GO:0005840//ribosome;GO:0034464//BBSome	GO:0003735//structural constituent of ribosome	GO:0006412//translation
State 1,2,3,4 -vs- State 1,2,3,5	SK1G00071818	4	1.77672e-08	3.22662e-07	Os06g0508700	XP_015614158.1 probable methionine--tRNA ligase [Oryza sativa Japonica Group]	Metabolism;Genetic Information Processing;Metabolism	Global and overview maps;Translation;Metabolism of other amino acids	ko01100//Metabolic pathways;ko00970//Aminoacyl-tRNA biosynthesis;ko00450//Selenocompound metabolism	K01874;K01874;K01874	GO:0005737//cytoplasm	GO:0000166//nucleotide binding;GO:0004812//aminoacyl-tRNA ligase activity;GO:0004822//isoleucine-tRNA ligase activity;GO:0004823//leucine-tRNA ligase activity;GO:0004825//methionine-tRNA ligase activity;GO:0004832//valine-tRNA ligase activity;GO:0005524//ATP binding	GO:0006418//tRNA aminoacylation for protein translation;GO:0006428//isoleucyl-tRNA aminoacylation;GO:0006429//leucyl-tRNA aminoacylation;GO:0006431//methionyl-tRNA aminoacylation;GO:0006438//valyl-tRNA aminoacylation;GO:0035556//intracellular signal transduction
State 1,2,3,4 -vs- State 1,2,3,5	SK1G00071843	3	3.61487e-08	6.36625e-07	BZ2	EAY78362.1 hypothetical protein OsI_33448 [Oryza sativa Indica Group]	Metabolism;Metabolism	Global and overview maps;Metabolism of other amino acids	ko01100//Metabolic pathways;ko00480//Glutathione metabolism	K00799;K00799	-	GO:0005515//protein binding;GO:0016034//maleylacetoacetate isomerase activity	GO:0006559//L-phenylalanine catabolic process;GO:0006572//tyrosine catabolic process;GO:0006749//glutathione metabolic process
State 1,2,3,4 -vs- State 1,2,3,5	SK1G00071851	2	3.15436e-205	2.54657e-202	At1g28570	AAM22723.1 putative lipase [Oryza sativa Japonica Group]	-	-	-	-	-	GO:0016788//hydrolase activity, acting on ester bonds	-
State 1,2,3,4 -vs- State 1,2,3,5	SK1G00071910	2	1.81048e-137	7.30818e-135	KLLA0C05324g	XP_015614040.1 probable glucan 1,3-beta-glucosidase A [Oryza sativa Japonica Group]	-	-	-	-	-	GO:0004553//hydrolase activity, hydrolyzing O-glycosyl compounds;GO:0030674//protein binding, bridging;GO:0051015//actin filament binding	GO:0071704//organic substance metabolic process
State 1,2,3,4 -vs- State 1,2,3,5	SK1G00071938	4	1.25369e-12	3.15171e-11	BHLH96	XP_015613301.1 transcription factor bHLH96 [Oryza sativa Japonica Group]	-	-	-	-	GO:0005737//cytoplasm;GO:0005852//eukaryotic translation initiation factor 3 complex	GO:0003743//translation initiation factor activity;GO:0046983//protein dimerization activity	-
State 1,2,3,4 -vs- State 1,2,3,5	SK1G00071958	4	1.5455e-47	1.41493e-45	THT2	EAY78283.1 hypothetical protein OsI_33328 [Oryza sativa Indica Group]	-	-	-	-	-	GO:0003824//catalytic activity;GO:0016747//transferase activity, transferring acyl groups other than amino-acyl groups	-
State 1,2,3,4 -vs- State 1,2,3,5	SK1G00071960	4	1.75377e-21	6.8913e-20	TYDC	XP_015613339.1 tyrosine decarboxylase-like [Oryza sativa Japonica Group]	-	-	-	-	-	GO:0004837//tyrosine decarboxylase activity;GO:0016829//lyase activity;GO:0016831//carboxy-lyase activity;GO:0030170//pyridoxal phosphate binding	GO:0006520//cellular amino acid metabolic process;GO:0006572//tyrosine catabolic process;GO:0015940//pantothenate biosynthetic process;GO:0019752//carboxylic acid metabolic process;GO:0051188//cofactor biosynthetic process
State 1,2,3,4 -vs- State 1,2,3,5	SK1G00072010	4	2.61438e-12	6.44021e-11	PLT6	KAB8112471.1 hypothetical protein EE612_050888 [Oryza sativa]	-	-	-	-	GO:0005887//integral component of plasma membrane;GO:0016021//integral component of membrane	GO:0008028//monocarboxylic acid transmembrane transporter activity;GO:0015114//phosphate ion transmembrane transporter activity;GO:0015238//drug transmembrane transporter activity;GO:0015295//solute:proton symporter activity;GO:0015307//drug:proton antiporter activity;GO:0022857//transmembrane transporter activity;GO:0042910//xenobiotic transporter activity;GO:0051119//sugar transmembrane transpo…	GO:0006810//transport;GO:0006817//phosphate ion transport;GO:0006855//drug transmembrane transport;GO:0008643//carbohydrate transport;GO:0015718//monocarboxylic acid transport;GO:0015893//drug transport;GO:0042493//response to drug;GO:0042908//xenobiotic transport;GO:0055085//transmembrane transport
State 1,2,3,4 -vs- State 1,2,3,5	SK1G00072024	2	3.93401e-12	9.57807e-11	--	AAM18723.1 putative elicitor inducible protein [Oryza sativa Japonica Group]	-	-	-	-	-	GO:0005515//protein binding	-
State 1,2,3,4 -vs- State 1,2,3,5	SK1G00072087	3	1.00617e-34	6.31472e-33	CSLH1	EAY78097.1 hypothetical protein OsI_33141 [Oryza sativa Indica Group]	-	-	-	-	GO:0016020//membrane	GO:0016760//cellulose synthase (UDP-forming) activity	GO:0030244//cellulose biosynthetic process
State 1,2,3,4 -vs- State 1,2,3,5	SK1G00072106	3	1.04084e-22	4.2842e-21	DTX16	EEC66772.1 hypothetical protein OsI_33158 [Oryza sativa Indica Group]	-	-	-	-	GO:0016020//membrane	GO:0015238//drug transmembrane transporter activity;GO:0015297//antiporter activity;GO:0042910//xenobiotic transporter activity	GO:0006855//drug transmembrane transport;GO:0042493//response to drug;GO:0055085//transmembrane transport
State 1,2,3,4 -vs- State 1,2,3,5	SK1G00072169	5	1.42579e-12	3.56416e-11	ATPC	EEC66716.1 hypothetical protein OsI_33051 [Oryza sativa Indica Group]	Metabolism;Metabolism	Global and overview maps;Energy metabolism	ko01100//Metabolic pathways;ko00190//Oxidative phosphorylation	K02136;K02136	GO:0000275//mitochondrial proton-transporting ATP synthase complex, catalytic core F(1);GO:0045261//proton-transporting ATP synthase complex, catalytic core F(1);GO:0045262//plasma membrane proton-transporting ATP synthase complex, catalytic core F(1)	GO:0046933//proton-transporting ATP synthase activity, rotational mechanism	GO:0015986//ATP synthesis coupled proton transport
State 1,2,3,4 -vs- State 1,2,3,5	SK1G00072360	2	7.50552e-10	1.53933e-08	DTX16	XP_015614944.1 protein DETOXIFICATION 16 [Oryza sativa Japonica Group]	-	-	-	-	GO:0016020//membrane	GO:0015238//drug transmembrane transporter activity;GO:0015297//antiporter activity;GO:0042910//xenobiotic transporter activity	GO:0006855//drug transmembrane transport;GO:0042493//response to drug;GO:0055085//transmembrane transport
State 1,2,3,4 -vs- State 1,2,3,5	SK1G00072387	5	7.43561e-25	3.33074e-23	ENO1	EEC66609.1 hypothetical protein OsI_32842 [Oryza sativa Indica Group]	Metabolism;Metabolism;Metabolism;Metabolism;Metabolism;Genetic Information Processing	Global and overview maps;Global and overview maps;Global and overview maps;Global and overview maps;Carbohydrate metabolism;Folding, sorting and degradation	ko01100//Metabolic pathways;ko01110//Biosynthesis of secondary metabolites;ko01200//Carbon metabolism;ko01230//Biosynthesis of amino acids;ko00010//Glycolysis / Gluconeogenesis;ko03018//RNA degradation	K01689;K01689;K01689;K01689;K01689;K01689	-	GO:0004634//phosphopyruvate hydratase activity;GO:0016836//hydro-lyase activity;GO:0050096//methylaspartate ammonia-lyase activity	GO:0006096//glycolytic process;GO:0009234//menaquinone biosynthetic process;GO:0019670//anaerobic glutamate catabolic process
State 1,2,3,4 -vs- State 1,2,3,5	SK1G00072401	5	2.32729e-51	2.34193e-49	RPS20A	XP_015614818.1 40S ribosomal protein S20-1 [Oryza sativa Japonica Group]	Genetic Information Processing	Translation	ko03010//Ribosome	K02969	GO:0000314//organellar small ribosomal subunit;GO:0022627//cytosolic small ribosomal subunit	GO:0003735//structural constituent of ribosome	GO:0006412//translation
State 1,2,3,4 -vs- State 1,2,3,5	SK1G00072483	2	4.64505e-80	8.73024e-78	--	-	-	-	-	-	-	-	-
State 1,2,3,4 -vs- State 1,2,3,5	SK1G00072518	2	3.69882e-23	1.55859e-21	PRP4	EAY77708.1 hypothetical protein OsI_32749 [Oryza sativa Indica Group]	-	-	-	-	-	-	-
State 1,2,3,4 -vs- State 1,2,3,5	SK1G00072529	2	9.50527e-10	1.93827e-08	--	EAY77714.1 hypothetical protein OsI_32756 [Oryza sativa Indica Group]	-	-	-	-	-	-	-
State 1,2,3,4 -vs- State 1,2,3,5	SK1G00072531	2	0	0	--	EAY77715.1 hypothetical protein OsI_32757 [Oryza sativa Indica Group]	-	-	-	-	-	-	-
State 1,2,3,4 -vs- State 1,2,3,5	SK1G00072532	2	1.23516411460312e-322	2.08930480313346e-319	--	EAY77716.1 hypothetical protein OsI_32758 [Oryza sativa Indica Group]	-	-	-	-	-	-	-
State 1,2,3,4 -vs- State 1,2,3,5	SK1G00072533	2	0	0	--	XP_024317154.1 proline-rich protein 4 [Brachypodium distachyon]	-	-	-	-	GO:0005802//trans-Golgi network	GO:0051540//metal cluster binding;GO:0071253//connexin binding	GO:0009399//nitrogen fixation;GO:0042998//positive regulation of Golgi to plasma membrane protein transport
State 1,2,3,4 -vs- State 1,2,3,5	SK1G00072563	1	6.3777e-12	1.5297e-10	GALM	EAY77740.1 hypothetical protein OsI_32784 [Oryza sativa Indica Group]	Metabolism;Metabolism;Metabolism;Metabolism	Global and overview maps;Global and overview maps;Carbohydrate metabolism;Carbohydrate metabolism	ko01100//Metabolic pathways;ko01110//Biosynthesis of secondary metabolites;ko00010//Glycolysis / Gluconeogenesis;ko00052//Galactose metabolism	K01785;K01785;K01785;K01785	-	GO:0004034//aldose 1-epimerase activity;GO:0016853//isomerase activity	GO:0005975//carbohydrate metabolic process;GO:0006012//galactose metabolic process
State 1,2,3,4 -vs- State 1,2,3,5	SK1G00072604	4	3.08783e-42	2.37415e-40	MGLL	XP_015614495.1 caffeoylshikimate esterase [Oryza sativa Japonica Group]	Metabolism;Metabolism	Global and overview maps;Lipid metabolism	ko01100//Metabolic pathways;ko00561//Glycerolipid metabolism	K01054;K01054	-	GO:0003674//molecular_function;GO:0003824//catalytic activity;GO:0008236//serine-type peptidase activity;GO:0016787//hydrolase activity;GO:0018738//S-formylglutathione hydrolase activity;GO:0047570//3-oxoadipate enol-lactonase activity;GO:0070205//2-succinyl-6-hydroxy-2,4-cyclohexadiene-1-carboxylate synthase activity	GO:0006508//proteolysis;GO:0009058//biosynthetic process;GO:0009102//biotin biosynthetic process;GO:0009234//menaquinone biosynthetic process;GO:0015979//photosynthesis;GO:0042952//beta-ketoadipate pathway;GO:0046292//formaldehyde metabolic process
State 1,2,3,4 -vs- State 1,2,3,5	SK1G00072665	5	4.51496e-09	8.64584e-08	--	OEL29802.1 hypothetical protein BAE44_0009179, partial [Dichanthelium oligosanthes]	-	-	-	-	-	-	-
State 1,2,3,4 -vs- State 1,2,3,5	SK1G00072719	1	2.92841e-09	5.73445e-08	At5g38386	XP_015613506.1 uncharacterized protein LOC4348029 [Oryza sativa Japonica Group]	-	-	-	-	-	GO:0005515//protein binding	GO:0006355//regulation of transcription, DNA-templated;GO:0019058//viral life cycle
State 1,2,3,4 -vs- State 1,2,3,5	SK1G00072792	4	1.14639e-10	2.49523e-09	Os10g0113000	EAY77503.1 hypothetical protein OsI_32550 [Oryza sativa Indica Group]	-	-	-	-	-	GO:0047834//D-threo-aldose 1-dehydrogenase activity	-
State 1,2,3,4 -vs- State 1,2,3,5	SK1G00072827	5	6.47929e-34	3.95171e-32	PAB8	XP_015611898.1 polyadenylate-binding protein 2 [Oryza sativa Japonica Group]	Genetic Information Processing;Genetic Information Processing;Genetic Information Processing	Translation;Folding, sorting and degradation;Translation	ko03013//RNA transport;ko03018//RNA degradation;ko03015//mRNA surveillance pathway	K13126;K13126;K13126	-	GO:0003676//nucleic acid binding;GO:0003723//RNA binding	GO:0008380//RNA splicing
State 1,2,3,4 -vs- State 1,2,3,5	SK1G00072829	4	4.75151e-27	2.27778e-25	CBSX1	XP_015612674.1 CBS domain-containing protein CBSX1, chloroplastic [Oryza sativa Japonica Group]	-	-	-	-	GO:0009898//cytoplasmic side of plasma membrane;GO:0043190//ATP-binding cassette (ABC) transporter complex	GO:0003938//IMP dehydrogenase activity;GO:0004122//cystathionine beta-synthase activity;GO:0005524//ATP binding;GO:0015095//magnesium ion transmembrane transporter activity;GO:0016853//isomerase activity;GO:0031263//amine-transporting ATPase activity	GO:0005975//carbohydrate metabolic process;GO:0009152//purine ribonucleotide biosynthetic process;GO:0015693//magnesium ion transport;GO:0015837//amine transport;GO:0019344//cysteine biosynthetic process
State 1,2,3,4 -vs- State 1,2,3,5	SK1G00072887	4	8.12816e-27	3.87035e-25	CCR1	EAZ08185.1 hypothetical protein OsI_30445 [Oryza sativa Indica Group]	Metabolism;Metabolism;Metabolism	Global and overview maps;Global and overview maps;Biosynthesis of other secondary metabolites	ko01100//Metabolic pathways;ko01110//Biosynthesis of secondary metabolites;ko00940//Phenylpropanoid biosynthesis	K09753;K09753;K09753	-	GO:0003824//catalytic activity;GO:0003854//3-beta-hydroxy-delta5-steroid dehydrogenase activity;GO:0003978//UDP-glucose 4-epimerase activity;GO:0008712//ADP-glyceromanno-heptose 6-epimerase activity;GO:0016616//oxidoreductase activity, acting on the CH-OH group of donors, NAD or NADP as acceptor;GO:0016757//transferase activity, transferring glycosyl groups;GO:0047733//CDP-glucose 4,6-dehydratase…	GO:0005975//carbohydrate metabolic process;GO:0006012//galactose metabolic process;GO:0006694//steroid biosynthetic process;GO:0009243//O antigen biosynthetic process;GO:0009244//lipopolysaccharide core region biosynthetic process;GO:0055114//oxidation-reduction process
State 1,2,3,4 -vs- State 1,2,3,5	SK1G00072918	2	1.67881e-24	7.43576e-23	At2g42990	XP_015612226.1 GDSL esterase/lipase At2g42990 isoform X1 [Oryza sativa Japonica Group]	-	-	-	-	-	GO:0016788//hydrolase activity, acting on ester bonds	-
State 1,2,3,4 -vs- State 1,2,3,5	SK1G00072935	3	9.45942e-09	1.76387e-07	DSP1	KAF0917414.1 hypothetical protein E2562_017863 [Oryza meyeriana var. granulata] [Oryza meyeriana]	-	-	-	-	-	GO:0004721//phosphoprotein phosphatase activity;GO:0004725//protein tyrosine phosphatase activity	GO:0006470//protein dephosphorylation
State 1,2,3,4 -vs- State 1,2,3,5	SK1G00073015	1	1.21433e-11	2.86043e-10	--	EAZ08248.1 hypothetical protein OsI_30504 [Oryza sativa Indica Group]	-	-	-	-	GO:0000109//nucleotide-excision repair complex;GO:0005680//anaphase-promoting complex	GO:0008270//zinc ion binding;GO:0016151//nickel cation binding;GO:0046872//metal ion binding;GO:0061630//ubiquitin protein ligase activity;GO:0097602//cullin family protein binding	GO:0006289//nucleotide-excision repair;GO:0031145//anaphase-promoting complex-dependent proteasomal ubiquitin-dependent protein catabolic process;GO:0051604//protein maturation
State 1,2,3,4 -vs- State 1,2,3,5	SK1G00073061	5	3.6672e-16	1.1259e-14	RPL17	XP_015612256.1 60S ribosomal protein L17 [Oryza sativa Japonica Group]	Genetic Information Processing	Translation	ko03010//Ribosome	K02880	GO:0000311//plastid large ribosomal subunit;GO:0005840//ribosome;GO:0022625//cytosolic large ribosomal subunit	GO:0003735//structural constituent of ribosome	GO:0006412//translation
State 1,2,3,4 -vs- State 1,2,3,5	SK1G00073063	2	9.09666e-31	4.94085e-29	SFH2	EEC84191.1 hypothetical protein OsI_30580 [Oryza sativa Indica Group]	-	-	-	-	-	GO:0043047//single-stranded telomeric DNA binding	-
State 1,2,3,4 -vs- State 1,2,3,5	SK1G00073076	4	2.86972e-41	2.17352e-39	IGPS	XP_015612573.1 uncharacterized protein LOC4346529 isoform X2 [Oryza sativa Japonica Group]	Metabolism;Metabolism;Metabolism;Metabolism	Global and overview maps;Global and overview maps;Global and overview maps;Amino acid metabolism	ko01100//Metabolic pathways;ko01110//Biosynthesis of secondary metabolites;ko01230//Biosynthesis of amino acids;ko00400//Phenylalanine, tyrosine and tryptophan biosynthesis	K01609;K01609;K01609;K01609	-	GO:0004425//indole-3-glycerol-phosphate synthase activity	-
State 1,2,3,4 -vs- State 1,2,3,5	SK1G00073090	2	3.85926e-08	6.75131e-07	RGP1	XP_015612602.1 ras-related protein RGP1 [Oryza sativa Japonica Group]	Cellular Processes	Transport and catabolism	ko04144//Endocytosis	K07904	GO:0005737//cytoplasm	GO:0003677//DNA binding;GO:0003924//GTPase activity;GO:0005524//ATP binding;GO:0005525//GTP binding;GO:0043022//ribosome binding	GO:0006400//tRNA modification;GO:0032508//DNA duplex unwinding;GO:0042254//ribosome biogenesis
State 1,2,3,4 -vs- State 1,2,3,5	SK1G00073102	3	1.94605e-12	4.83749e-11	STR9	EAZ08414.1 hypothetical protein OsI_30678 [Oryza sativa Indica Group]	-	-	-	-	-	GO:0003824//catalytic activity	GO:0001887//selenium compound metabolic process;GO:0006400//tRNA modification;GO:0009228//thiamine biosynthetic process
State 1,2,3,4 -vs- State 1,2,3,5	SK1G00073117	5	4.14163e-09	7.96098e-08	Os09g0277800	EEC84235.1 hypothetical protein OsI_30663 [Oryza sativa Indica Group]	Metabolism;Metabolism;Metabolism;Metabolism;Metabolism	Global and overview maps;Global and overview maps;Global and overview maps;Lipid metabolism;Metabolism of cofactors and vitamins	ko01100//Metabolic pathways;ko01110//Biosynthesis of secondary metabolites;ko01212//Fatty acid metabolism;ko00061//Fatty acid biosynthesis;ko00780//Biotin metabolism	K00208;K00208;K00208;K00208;K00208	-	GO:0004316//3-oxoacyl-[acyl-carrier-protein] reductase (NADPH) activity;GO:0008667//2,3-dihydro-2,3-dihydroxybenzoate dehydrogenase activity;GO:0008678//2-deoxy-D-gluconate 3-dehydrogenase activity;GO:0016491//oxidoreductase activity;GO:0050662//coenzyme binding;GO:0051287//NAD binding	GO:0000272//polysaccharide catabolic process;GO:0006633//fatty acid biosynthetic process;GO:0055114//oxidation-reduction process
State 1,2,3,4 -vs- State 1,2,3,5	SK1G00073130	4	8.77189e-09	1.63911e-07	--	EAZ08385.1 hypothetical protein OsI_30645 [Oryza sativa Indica Group]	-	-	-	-	-	-	-
State 1,2,3,4 -vs- State 1,2,3,5	SK1G00073139	2	4.9209e-12	1.18912e-10	--	EEC84221.1 hypothetical protein OsI_30636 [Oryza sativa Indica Group]	-	-	-	-	GO:0005777//peroxisome;GO:0015630//microtubule cytoskeleton;GO:0016020//membrane;GO:0016021//integral component of membrane;GO:0016593//Cdc73/Paf1 complex	GO:0003723//RNA binding;GO:0004521//endoribonuclease activity;GO:0005219//ryanodine-sensitive calcium-release channel activity;GO:0005515//protein binding;GO:0020037//heme binding;GO:0046872//metal ion binding;GO:0046873//metal ion transmembrane transporter activity	GO:0000226//microtubule cytoskeleton organization;GO:0006270//DNA replication initiation;GO:0006368//transcription elongation from RNA polymerase II promoter;GO:0006874//cellular calcium ion homeostasis;GO:0009405//pathogenesis;GO:0016560//protein import into peroxisome matrix, docking;GO:0016570//histone modification;GO:0030001//metal ion transport;GO:0043571//maintenance of CRISPR repeat elemen…
State 1,2,3,4 -vs- State 1,2,3,5	SK1G00073299	2	3.37246e-11	7.7338e-10	GFT1	XP_015612459.1 GDP-fucose transporter 1 [Oryza sativa Japonica Group]	-	-	-	-	-	-	-
State 1,2,3,4 -vs- State 1,2,3,5	SK1G00073319	1	6.38267e-18	2.15109e-16	--	XP_015651468.1 uncharacterized protein LOC4346684 [Oryza sativa Japonica Group]	-	-	-	-	GO:0005730//nucleolus	GO:0003677//DNA binding;GO:0008134//transcription factor binding	GO:0006355//regulation of transcription, DNA-templated
State 1,2,3,4 -vs- State 1,2,3,5	SK1G00073431	3	8.95736e-55	1.00373e-52	CAB1R	XP_015611833.1 chlorophyll a-b binding protein 1, chloroplastic [Oryza sativa Japonica Group]	Metabolism;Metabolism	Global and overview maps;Energy metabolism	ko01100//Metabolic pathways;ko00196//Photosynthesis - antenna proteins	K08912;K08912	-	-	-
State 1,2,3,4 -vs- State 1,2,3,5	SK1G00073449	4	3.00136e-21	1.17416e-19	--	EEE69514.1 hypothetical protein OsJ_28972 [Oryza sativa Japonica Group]	-	-	-	-	-	GO:0005515//protein binding	-
State 1,2,3,4 -vs- State 1,2,3,5	SK1G00073477	4	1.4793e-20	5.5866e-19	ABCG53	EEC84379.1 hypothetical protein OsI_30931 [Oryza sativa Indica Group]	-	-	-	-	GO:0005575//cellular_component;GO:0005737//cytoplasm;GO:0005887//integral component of plasma membrane;GO:0009379//Holliday junction helicase complex;GO:0009380//excinuclease repair complex;GO:0009898//cytoplasmic side of plasma membrane;GO:0016020//membrane;GO:0016021//integral component of membrane;GO:0043190//ATP-binding cassette (ABC) transporter complex;GO:0055051//ATP-binding cassette (ABC)…	GO:0000166//nucleotide binding;GO:0003674//molecular_function;GO:0003924//GTPase activity;GO:0004385//guanylate kinase activity;GO:0004386//helicase activity;GO:0005319//lipid transporter activity;GO:0005524//ATP binding;GO:0005525//GTP binding;GO:0008565//protein transporter activity;GO:0009378//four-way junction helicase activity;GO:0009381//excinuclease ABC activity;GO:0015220//choline transme…	GO:0000910//cytokinesis;GO:0002949//tRNA threonylcarbamoyladenosine modification;GO:0006281//DNA repair;GO:0006289//nucleotide-excision repair;GO:0006310//DNA recombination;GO:0006400//tRNA modification;GO:0006464//cellular protein modification process;GO:0006576//cellular biogenic amine metabolic process;GO:0006810//transport;GO:0006817//phosphate ion transport;GO:0006824//cobalt ion transport;G…
State 1,2,3,4 -vs- State 1,2,3,5	SK1G00073493	2	8.67219e-51	8.62895e-49	PAO6	XP_015611019.1 polyamine oxidase [Oryza sativa Japonica Group]	Metabolism;Metabolism;Metabolism	Global and overview maps;Amino acid metabolism;Metabolism of other amino acids	ko01100//Metabolic pathways;ko00330//Arginine and proline metabolism;ko00410//beta-Alanine metabolism	K13366;K13366;K13366	-	GO:0003824//catalytic activity;GO:0004729//oxygen-dependent protoporphyrinogen oxidase activity;GO:0008767//UDP-galactopyranose mutase activity;GO:0016166//phytoene dehydrogenase activity;GO:0016491//oxidoreductase activity;GO:0045550//geranylgeranyl reductase activity;GO:0050662//coenzyme binding	GO:0006779//porphyrin-containing compound biosynthetic process;GO:0009228//thiamine biosynthetic process;GO:0009273//peptidoglycan-based cell wall biogenesis;GO:0015995//chlorophyll biosynthetic process;GO:0016117//carotenoid biosynthetic process;GO:0030494//bacteriochlorophyll biosynthetic process;GO:0055114//oxidation-reduction process
State 1,2,3,4 -vs- State 1,2,3,5	SK1G00073496	2	2.65563e-68	3.88203e-66	GSTU1	BAF24921.1 Os09g0367700, partial [Oryza sativa Japonica Group]	Metabolism;Metabolism	Global and overview maps;Metabolism of other amino acids	ko01100//Metabolic pathways;ko00480//Glutathione metabolism	K00799;K00799	-	GO:0005515//protein binding;GO:0015035//protein disulfide oxidoreductase activity;GO:0016034//maleylacetoacetate isomerase activity	GO:0006559//L-phenylalanine catabolic process;GO:0006572//tyrosine catabolic process;GO:0006749//glutathione metabolic process;GO:0006790//sulfur compound metabolic process;GO:0042965//glutaredoxin biosynthetic process;GO:0045454//cell redox homeostasis;GO:0055114//oxidation-reduction process
State 1,2,3,4 -vs- State 1,2,3,5	SK1G00073504	3	1.10751e-08	2.05328e-07	RPPL1	EAZ44471.1 hypothetical protein OsJ_29088 [Oryza sativa Japonica Group]	-	-	-	-	-	GO:0005515//protein binding;GO:0043531//ADP binding	-
State 1,2,3,4 -vs- State 1,2,3,5	SK1G00073529	5	2.54192e-16	7.89973e-15	VDAC1	XP_015611862.1 mitochondrial outer membrane protein porin 1 [Oryza sativa Japonica Group]	-	-	-	-	GO:0005741//mitochondrial outer membrane	-	GO:0055085//transmembrane transport
State 1,2,3,4 -vs- State 1,2,3,5	SK1G00073574	2	6.47866e-23	2.69795e-21	EBS	XP_015651191.1 chromatin remodeling protein EBS isoform X1 [Oryza sativa Japonica Group]	-	-	-	-	-	GO:0003682//chromatin binding;GO:0005525//GTP binding	-
State 1,2,3,4 -vs- State 1,2,3,5	SK1G00073578	5	5.36791e-13	1.38374e-11	SAP17	EAZ08955.1 hypothetical protein OsI_31221 [Oryza sativa Indica Group]	-	-	-	-	-	GO:0008270//zinc ion binding;GO:0046872//metal ion binding	-
State 1,2,3,4 -vs- State 1,2,3,5	SK1G00073685	2	2.39239e-13	6.3231e-12	OsI_37456	EEC84527.1 hypothetical protein OsI_31247 [Oryza sativa Indica Group]	Metabolism;Metabolism;Metabolism;Metabolism;Metabolism;Metabolism;Metabolism	Global and overview maps;Global and overview maps;Global and overview maps;Global and overview maps;Carbohydrate metabolism;Nucleotide metabolism;Carbohydrate metabolism	ko01100//Metabolic pathways;ko01110//Biosynthesis of secondary metabolites;ko01200//Carbon metabolism;ko01230//Biosynthesis of amino acids;ko00010//Glycolysis / Gluconeogenesis;ko00230//Purine metabolism;ko00620//Pyruvate metabolism	K00873;K00873;K00873;K00873;K00873;K00873;K00873	GO:0005737//cytoplasm	GO:0000287//magnesium ion binding;GO:0004743//pyruvate kinase activity;GO:0016791//phosphatase activity;GO:0030955//potassium ion binding	GO:0006096//glycolytic process
State 1,2,3,4 -vs- State 1,2,3,5	SK1G00073704	5	1.00258e-08	1.86459e-07	At1g26850	EAZ09099.1 hypothetical protein OsI_31366 [Oryza sativa Indica Group]	-	-	-	-	-	GO:0008168//methyltransferase activity	GO:0008299//isoprenoid biosynthetic process
State 1,2,3,4 -vs- State 1,2,3,5	SK1G00073726	5	1.17136e-11	2.76289e-10	RPL34	XP_015651340.1 60S ribosomal protein L34 [Oryza sativa Japonica Group]	Genetic Information Processing	Translation	ko03010//Ribosome	K02915	GO:0005840//ribosome	GO:0003735//structural constituent of ribosome	GO:0006412//translation
State 1,2,3,4 -vs- State 1,2,3,5	SK1G00073789	1	2.03189e-11	4.72052e-10	--	XP_015610922.1 uncharacterized protein LOC4346996 [Oryza sativa Japonica Group]	-	-	-	-	-	-	-
State 1,2,3,4 -vs- State 1,2,3,5	SK1G00073806	1	1.99551e-08	3.60736e-07	TPS6	XP_015611910.1 alpha,alpha-trehalose-phosphate synthase [UDP-forming] 6 [Oryza sativa Japonica Group]	Metabolism;Metabolism;Metabolism	Global and overview maps;Global and overview maps;Carbohydrate metabolism	ko01100//Metabolic pathways;ko01110//Biosynthesis of secondary metabolites;ko00500//Starch and sucrose metabolism	K16055;K16055;K16055	-	GO:0003824//catalytic activity;GO:0003825//alpha,alpha-trehalose-phosphate synthase (UDP-forming) activity;GO:0004805//trehalose-phosphatase activity;GO:0008967//phosphoglycolate phosphatase activity;GO:0016787//hydrolase activity;GO:0033828//glucosylglycerol-phosphate synthase activity	GO:0005992//trehalose biosynthetic process;GO:0006970//response to osmotic stress;GO:0008152//metabolic process
State 1,2,3,4 -vs- State 1,2,3,5	SK1G00073817	4	5.57951e-09	1.0593e-07	GLR2.9	OEL24842.1 Glutamate receptor 2.8 [Dichanthelium oligosanthes]	-	-	-	-	GO:0016020//membrane;GO:0030288//outer membrane-bounded periplasmic space;GO:0031362//anchored component of external side of plasma membrane	GO:0004970//ionotropic glutamate receptor activity;GO:0015276//ligand-gated ion channel activity;GO:0033286//ectoine-transporting ATPase activity;GO:0033288//hydroxyectoine-transporting ATPase activity;GO:0033294//ectoine binding;GO:0033295//hydroxyectoine binding	GO:0033308//hydroxyectoine transport;GO:0051470//ectoine transport
State 1,2,3,4 -vs- State 1,2,3,5	SK1G00073846	2	1.93283e-17	6.38679e-16	GL1-1	XP_015651446.1 protein ECERIFERUM 3 [Oryza sativa Japonica Group]	-	-	-	-	-	GO:0004316//3-oxoacyl-[acyl-carrier-protein] reductase (NADPH) activity;GO:0005506//iron ion binding;GO:0016491//oxidoreductase activity	GO:0006633//fatty acid biosynthetic process;GO:0008610//lipid biosynthetic process;GO:0055114//oxidation-reduction process
State 1,2,3,4 -vs- State 1,2,3,5	SK1G00073852	2	5.8457e-148	2.62849e-145	TET7	XP_015611839.1 tetraspanin-8 [Oryza sativa Japonica Group]	-	-	-	-	GO:0016021//integral component of membrane	-	-
State 1,2,3,4 -vs- State 1,2,3,5	SK1G00073875	2	3.1725e-32	1.82944e-30	2025-08-08	XP_015612539.1 AUGMIN subunit 8 [Oryza sativa Japonica Group]	-	-	-	-	-	-	-
State 1,2,3,4 -vs- State 1,2,3,5	SK1G00073880	1	1.26137e-205	1.04201e-202	--	KAB8110578.1 hypothetical protein EE612_047894 [Oryza sativa]	-	-	-	-	GO:0005634//nucleus	GO:0003677//DNA binding;GO:0008270//zinc ion binding	-
State 1,2,3,4 -vs- State 1,2,3,5	SK1G00073891	1	3.1719e-23	1.33815e-21	RUB1	XP_002460225.1 ubiquitin-NEDD8-like protein RUB1 [Sorghum bicolor]	-	-	-	-	-	GO:0005515//protein binding	GO:0006289//nucleotide-excision repair
State 1,2,3,4 -vs- State 1,2,3,5	SK1G00073910	4	4.11619e-12	1.0001e-10	CIPK16	EAZ09117.1 hypothetical protein OsI_31382 [Oryza sativa Indica Group]	-	-	-	-	GO:0015627//type II protein secretion system complex	GO:0004672//protein kinase activity;GO:0005524//ATP binding;GO:0008565//protein transporter activity	GO:0006468//protein phosphorylation;GO:0007165//signal transduction;GO:0015628//protein secretion by the type II secretion system
State 1,2,3,4 -vs- State 1,2,3,5	SK1G00073912	4	9.9836e-25	4.46085e-23	WRKY76	Q6IEK5.1 RecName: Full=WRKY transcription factor WRKY76; Short=OsWRKY76 [Oryza sativa Indica Group]	-	-	-	-	-	GO:0003677//DNA binding;GO:0003700//transcription factor activity, sequence-specific DNA binding;GO:0004803//transposase activity;GO:0043565//sequence-specific DNA binding	GO:0006313//transposition, DNA-mediated;GO:0006355//regulation of transcription, DNA-templated
State 1,2,3,4 -vs- State 1,2,3,5	SK1G00073960	4	2.19011e-12	5.42141e-11	RSH3	XP_015611622.1 probable GTP diphosphokinase RSH3, chloroplastic [Oryza sativa Japonica Group]	Metabolism;Metabolism	Global and overview maps;Nucleotide metabolism	ko01100//Metabolic pathways;ko00230//Purine metabolism	K00951;K00951	-	GO:0003824//catalytic activity	GO:0015968//stringent response;GO:0015969//guanosine tetraphosphate metabolic process
State 1,2,3,4 -vs- State 1,2,3,5	SK1G00073961	3	4.21857e-17	1.36477e-15	Os09g0442300	XP_015611623.1 protein GAMETE EXPRESSED 1 [Oryza sativa Japonica Group]	-	-	-	-	GO:0005576//extracellular region	GO:0005524//ATP binding;GO:0008234//cysteine-type peptidase activity;GO:0008289//lipid binding;GO:0051082//unfolded protein binding	GO:0006508//proteolysis;GO:0006869//lipid transport;GO:0007059//chromosome segregation;GO:0030261//chromosome condensation
State 1,2,3,4 -vs- State 1,2,3,5	SK1G00073968	2	4.02232e-10	8.4445e-09	COPT5.1	EEE69797.1 hypothetical protein OsJ_29521 [Oryza sativa Japonica Group]	-	-	-	-	GO:0016021//integral component of membrane	GO:0005375//copper ion transmembrane transporter activity	GO:0035434//copper ion transmembrane transport
State 1,2,3,4 -vs- State 1,2,3,5	SK1G00073983	3	3.95917e-15	1.15846e-13	CPN20	EAZ09241.1 hypothetical protein OsI_31514 [Oryza sativa Indica Group]	-	-	-	-	-	GO:0005524//ATP binding;GO:0016887//ATPase activity	GO:0006457//protein folding
State 1,2,3,4 -vs- State 1,2,3,5	SK1G00074004	5	1.41068e-21	5.55545e-20	EREBP1	EAZ09217.1 hypothetical protein OsI_31492 [Oryza sativa Indica Group]	-	-	-	-	-	GO:0003700//transcription factor activity, sequence-specific DNA binding	GO:0006355//regulation of transcription, DNA-templated
State 1,2,3,4 -vs- State 1,2,3,5	SK1G00074012	4	2.77403e-09	5.44414e-08	--	EAZ09210.1 hypothetical protein OsI_31485 [Oryza sativa Indica Group]	-	-	-	-	-	-	-
State 1,2,3,4 -vs- State 1,2,3,5	SK1G00074013	2	2.56173e-177	1.51663e-174	At1g07660	XP_016507811.1 PREDICTED: uncharacterized protein LOC107825453 [Nicotiana tabacum]	-	-	-	-	GO:0071821//FANCM-MHF complex	GO:0003677//DNA binding	GO:0006352//DNA-templated transcription, initiation
State 1,2,3,4 -vs- State 1,2,3,5	SK1G00074031	2	1.07804e-35	6.98798e-34	PGI1	EEC84721.1 hypothetical protein OsI_31689 [Oryza sativa Indica Group]	Metabolism;Metabolism;Metabolism;Metabolism;Metabolism;Metabolism;Metabolism	Global and overview maps;Global and overview maps;Global and overview maps;Carbohydrate metabolism;Carbohydrate metabolism;Carbohydrate metabolism;Carbohydrate metabolism	ko01100//Metabolic pathways;ko01110//Biosynthesis of secondary metabolites;ko01200//Carbon metabolism;ko00500//Starch and sucrose metabolism;ko00010//Glycolysis / Gluconeogenesis;ko00520//Amino sugar and nucleotide sugar metabolism;ko00030//Pentose phosphate pathway	K01810;K01810;K01810;K01810;K01810;K01810;K01810	-	GO:0004347//glucose-6-phosphate isomerase activity	GO:0006094//gluconeogenesis;GO:0006096//glycolytic process
State 1,2,3,4 -vs- State 1,2,3,5	SK1G00074051	2	4.27729e-08	7.45159e-07	TCEA-B1	EAZ03815.1 hypothetical protein OsI_25944 [Oryza sativa Indica Group]	-	-	-	-	-	GO:0003847//1-alkyl-2-acetylglycerophosphocholine esterase activity;GO:0008236//serine-type peptidase activity;GO:0016787//hydrolase activity	GO:0006508//proteolysis;GO:0016042//lipid catabolic process
State 1,2,3,4 -vs- State 1,2,3,5	SK1G00074072	4	7.59366e-10	1.55494e-08	AMY1.2	XP_015612111.1 alpha-amylase isozyme 3A isoform X1 [Oryza sativa Japonica Group]	Metabolism;Metabolism;Metabolism	Global and overview maps;Global and overview maps;Carbohydrate metabolism	ko01100//Metabolic pathways;ko01110//Biosynthesis of secondary metabolites;ko00500//Starch and sucrose metabolism	K01176;K01176;K01176	-	GO:0003824//catalytic activity;GO:0003844//1,4-alpha-glucan branching enzyme activity;GO:0004133//glycogen debranching enzyme activity;GO:0004556//alpha-amylase activity;GO:0005509//calcium ion binding;GO:0008788//alpha,alpha-phosphotrehalase activity;GO:0016798//hydrolase activity, acting on glycosyl bonds;GO:0046527//glucosyltransferase activity;GO:0047470//(1,4)-alpha-D-glucan 1-alpha-D-glucos…	GO:0005975//carbohydrate metabolic process;GO:0005978//glycogen biosynthetic process;GO:0005980//glycogen catabolic process;GO:0005991//trehalose metabolic process;GO:0005992//trehalose biosynthetic process;GO:0009250//glucan biosynthetic process
State 1,2,3,4 -vs- State 1,2,3,5	SK1G00074076	2	1.90726e-32	1.10341e-30	HSFB1	KAB8110836.1 hypothetical protein EE612_048278 [Oryza sativa]	-	-	-	-	-	GO:0003700//transcription factor activity, sequence-specific DNA binding;GO:0043565//sequence-specific DNA binding	GO:0006355//regulation of transcription, DNA-templated
State 1,2,3,4 -vs- State 1,2,3,5	SK1G00074086	4	4.99771e-13	1.28924e-11	MPT3	EAZ09358.1 hypothetical protein OsI_31630 [Oryza sativa Indica Group]	-	-	-	-	-	-	-
State 1,2,3,4 -vs- State 1,2,3,5	SK1G00074096	4	6.3368e-16	1.92225e-14	TPP2	EAZ09345.1 hypothetical protein OsI_31616 [Oryza sativa Indica Group]	Genetic Information Processing	Folding, sorting and degradation	ko03060//Protein export	K03100	GO:0030288//outer membrane-bounded periplasmic space	GO:0004252//serine-type endopeptidase activity	GO:0000746//conjugation;GO:0006465//signal peptide processing;GO:0009306//protein secretion;GO:0019430//removal of superoxide radicals
State 1,2,3,4 -vs- State 1,2,3,5	SK1G00074100	4	6.4541e-46	5.67482e-44	B3GALT7	XP_015612661.1 beta-1,3-galactosyltransferase 7 [Oryza sativa Japonica Group]	-	-	-	-	GO:0016020//membrane	GO:0016757//transferase activity, transferring glycosyl groups;GO:0016758//transferase activity, transferring hexosyl groups	GO:0006486//protein glycosylation
State 1,2,3,4 -vs- State 1,2,3,5	SK1G00074122	5	4.60455e-13	1.19128e-11	MAP65-6	XP_015611654.1 65-kDa microtubule-associated protein 6 [Oryza sativa Japonica Group]	-	-	-	-	-	-	GO:0031023//microtubule organizing center organization;GO:0051225//spindle assembly
State 1,2,3,4 -vs- State 1,2,3,5	SK1G00074129	4	9.19339e-10	1.87575e-08	SAP1	XP_015651267.1 zinc finger A20 and AN1 domain-containing stress-associated protein 1 [Oryza sativa Japonica Group]	-	-	-	-	-	GO:0003677//DNA binding;GO:0008270//zinc ion binding	-
State 1,2,3,4 -vs- State 1,2,3,5	SK1G00074133	5	7.40678e-148	3.28879e-145	RPL9	XP_015612091.1 60S ribosomal protein L9 [Oryza sativa Japonica Group]	Genetic Information Processing	Translation	ko03010//Ribosome	K02940	GO:0005840//ribosome;GO:0022625//cytosolic large ribosomal subunit	GO:0003735//structural constituent of ribosome;GO:0019843//rRNA binding	GO:0006412//translation
State 1,2,3,4 -vs- State 1,2,3,5	SK1G00074140	4	9.00268e-16	2.70553e-14	At1g50590	XP_015651432.1 pirin-like protein [Oryza sativa Japonica Group]	-	-	-	-	-	GO:0003700//transcription factor activity, sequence-specific DNA binding	-
State 1,2,3,4 -vs- State 1,2,3,5	SK1G00074152	5	1.18651e-09	2.40019e-08	--	XP_015651455.1 uncharacterized protein LOC9271885 [Oryza sativa Japonica Group]	-	-	-	-	-	GO:0005509//calcium ion binding	-
State 1,2,3,4 -vs- State 1,2,3,5	SK1G00074153	1	5.87845e-09	1.11308e-07	FLA7	XP_015610709.1 fasciclin-like arabinogalactan protein 7 isoform X1 [Oryza sativa Japonica Group]	-	-	-	-	GO:0005576//extracellular region;GO:0042600//chorion	GO:0005213//structural constituent of chorion	GO:0007304//chorion-containing eggshell formation
State 1,2,3,4 -vs- State 1,2,3,5	SK1G00074203	4	5.90304e-15	1.71735e-13	MNB1A	EAZ09480.1 hypothetical protein OsI_31752 [Oryza sativa Indica Group]	-	-	-	-	-	GO:0003677//DNA binding	GO:0006355//regulation of transcription, DNA-templated
State 1,2,3,4 -vs- State 1,2,3,5	SK1G00074211	5	4.64206e-12	1.12403e-10	HSP90-5	EEC84746.1 hypothetical protein OsI_31743 [Oryza sativa Indica Group]	Organismal Systems;Genetic Information Processing	Environmental adaptation;Folding, sorting and degradation	ko04626//Plant-pathogen interaction;ko04141//Protein processing in endoplasmic reticulum	K09487;K09487	-	GO:0005524//ATP binding;GO:0016887//ATPase activity;GO:0051082//unfolded protein binding	GO:0006457//protein folding
State 1,2,3,4 -vs- State 1,2,3,5	SK1G00074227	2	4.97612e-17	1.59965e-15	WAK1	XP_015610738.1 putative wall-associated receptor kinase-like 16 [Oryza sativa Japonica Group]	-	-	-	-	-	GO:0004672//protein kinase activity;GO:0005509//calcium ion binding;GO:0005524//ATP binding;GO:0030247//polysaccharide binding	GO:0006468//protein phosphorylation
State 1,2,3,4 -vs- State 1,2,3,5	SK1G00074237	2	6.86072e-23	2.8537e-21	--	EAZ09439.1 hypothetical protein OsI_31711 [Oryza sativa Indica Group]	-	-	-	-	GO:0005634//nucleus	-	GO:0019069//viral capsid assembly;GO:0045892//negative regulation of transcription, DNA-templated
State 1,2,3,4 -vs- State 1,2,3,5	SK1G00074256	5	6.48812e-95	1.68227e-92	RPL7A-1	XP_015611976.1 60S ribosomal protein L7a-2 [Oryza sativa Japonica Group]	Genetic Information Processing	Translation	ko03010//Ribosome	K02936	GO:0016021//integral component of membrane	-	-
State 1,2,3,4 -vs- State 1,2,3,5	SK1G00074268	4	1.97229e-13	5.24398e-12	PAP27	XP_015651240.1 nucleotide pyrophosphatase/phosphodiesterase [Oryza sativa Japonica Group]	-	-	-	-	-	GO:0003993//acid phosphatase activity;GO:0016787//hydrolase activity;GO:0016788//hydrolase activity, acting on ester bonds;GO:0046872//metal ion binding	-
State 1,2,3,4 -vs- State 1,2,3,5	SK1G00074278	2	1.48764e-14	4.24108e-13	--	XP_015611016.1 uncharacterized protein LOC9267854 [Oryza sativa Japonica Group]	-	-	-	-	GO:0000109//nucleotide-excision repair complex	GO:0008270//zinc ion binding;GO:0046872//metal ion binding	GO:0006289//nucleotide-excision repair
State 1,2,3,4 -vs- State 1,2,3,5	SK1G00074296	5	2.2233e-08	3.99273e-07	RPL32A	XP_006660801.1 PREDICTED: 60S ribosomal protein L32-1 [Oryza brachyantha]	Genetic Information Processing	Translation	ko03010//Ribosome	K02912	GO:0005840//ribosome	GO:0003735//structural constituent of ribosome	GO:0006412//translation
State 1,2,3,4 -vs- State 1,2,3,5	SK1G00074297	5	3.67111e-10	7.72086e-09	RPL32A	BAT08818.1 Os09g0501700 [Oryza sativa Japonica Group]	Genetic Information Processing	Translation	ko03010//Ribosome	K02912	GO:0005840//ribosome;GO:0005854//nascent polypeptide-associated complex	GO:0003735//structural constituent of ribosome;GO:0003755//peptidyl-prolyl cis-trans isomerase activity;GO:0051082//unfolded protein binding	GO:0006412//translation;GO:0051083//'de novo' cotranslational protein folding
State 1,2,3,4 -vs- State 1,2,3,5	SK1G00074299	2	9.74064e-28	4.80565e-26	BHLH49	EAZ09639.1 hypothetical protein OsI_31923 [Oryza sativa Indica Group]	-	-	-	-	-	GO:0016157//sucrose synthase activity;GO:0046983//protein dimerization activity;GO:0050415//formimidoylglutamase activity	GO:0005985//sucrose metabolic process;GO:0019556//histidine catabolic process to glutamate and formamide
State 1,2,3,4 -vs- State 1,2,3,5	SK1G00074300	5	7.60348e-22	3.02453e-20	RPL32A	TVU10126.1 hypothetical protein EJB05_43636, partial [Eragrostis curvula]	Genetic Information Processing	Translation	ko03010//Ribosome	K02912	GO:0005840//ribosome	GO:0003735//structural constituent of ribosome	GO:0006412//translation
State 1,2,3,4 -vs- State 1,2,3,5	SK1G00074310	2	1.47488e-62	1.97701e-60	--	XP_015612642.1 uncharacterized protein LOC4347474 [Oryza sativa Japonica Group]	-	-	-	-	-	-	-
State 1,2,3,4 -vs- State 1,2,3,5	SK1G00074334	5	9.89957e-10	2.01636e-08	--	EAZ09596.1 hypothetical protein OsI_31877 [Oryza sativa Indica Group]	-	-	-	-	-	-	-
State 1,2,3,4 -vs- State 1,2,3,5	SK1G00074342	5	1.3267e-14	3.7975e-13	HSP70-9	XP_015611783.1 heat shock 70 kDa protein, mitochondrial [Oryza sativa Japonica Group]	Genetic Information Processing	Folding, sorting and degradation	ko03018//RNA degradation	K04043	-	GO:0005515//protein binding;GO:0005524//ATP binding;GO:0008741//ribulokinase activity;GO:0016773//phosphotransferase activity, alcohol group as acceptor;GO:0016887//ATPase activity;GO:0051082//unfolded protein binding	GO:0005975//carbohydrate metabolic process;GO:0006457//protein folding;GO:0006950//response to stress;GO:0008360//regulation of cell shape;GO:0019568//arabinose catabolic process;GO:0043093//FtsZ-dependent cytokinesis
State 1,2,3,4 -vs- State 1,2,3,5	SK1G00074344	4	4.376e-28	2.19554e-26	PILS1	EEC84799.1 hypothetical protein OsI_31863 [Oryza sativa Indica Group]	-	-	-	-	GO:0016021//integral component of membrane	-	GO:0055085//transmembrane transport
State 1,2,3,4 -vs- State 1,2,3,5	SK1G00074380	2	1.82847e-08	3.3172e-07	RAD52-2	XP_015612379.1 DNA repair RAD52-like protein 2, chloroplastic [Oryza sativa Japonica Group]	-	-	-	-	-	-	-
State 1,2,3,4 -vs- State 1,2,3,5	SK1G00074394	4	2.80514e-08	4.9872e-07	BGLU31	XP_015612357.1 beta-glucosidase 31 [Oryza sativa Japonica Group]	Metabolism;Metabolism;Metabolism;Metabolism;Metabolism	Global and overview maps;Global and overview maps;Biosynthesis of other secondary metabolites;Carbohydrate metabolism;Metabolism of other amino acids	ko01100//Metabolic pathways;ko01110//Biosynthesis of secondary metabolites;ko00940//Phenylpropanoid biosynthesis;ko00500//Starch and sucrose metabolism;ko00460//Cyanoamino acid metabolism	K01188;K01188;K01188;K01188;K01188	GO:0009341//beta-galactosidase complex	GO:0004553//hydrolase activity, hydrolyzing O-glycosyl compounds;GO:0004565//beta-galactosidase activity	GO:0005975//carbohydrate metabolic process;GO:0006012//galactose metabolic process;GO:0071704//organic substance metabolic process
State 1,2,3,4 -vs- State 1,2,3,5	SK1G00074407	2	2.27575e-29	1.18533e-27	FAM214B	EEC67643.1 hypothetical protein OsI_35048 [Oryza sativa Indica Group]	-	-	-	-	-	-	-
State 1,2,3,4 -vs- State 1,2,3,5	SK1G00074419	4	7.48696e-14	2.05368e-12	SGR	A2Z3E5.1 RecName: Full=Protein STAY-GREEN, chloroplastic; AltName: Full=Protein STAYGREEN; Flags: Precursor [Oryza sativa Indica Group]	Metabolism;Metabolism	Global and overview maps;Metabolism of cofactors and vitamins	ko01110//Biosynthesis of secondary metabolites;ko00860//Porphyrin and chlorophyll metabolism	K22013;K22013	-	-	-
State 1,2,3,4 -vs- State 1,2,3,5	SK1G00074434	3	1.70346e-23	7.27288e-22	At4g27700	KAF0924380.1 hypothetical protein E2562_010055 [Oryza meyeriana var. granulata] [Oryza meyeriana]	-	-	-	-	GO:0005740//mitochondrial envelope	GO:0003824//catalytic activity;GO:0004129//cytochrome-c oxidase activity;GO:0018802//2,4-dihydroxyhept-2-ene-1,7-dioate aldolase activity	-
State 1,2,3,4 -vs- State 1,2,3,5	SK1G00074440	2	6.03145e-18	2.03853e-16	GYP7	XP_015612460.1 GTPase-activating protein gyp7 [Oryza sativa Japonica Group]	-	-	-	-	-	-	-
State 1,2,3,4 -vs- State 1,2,3,5	SK1G00074475	4	4.44949e-21	1.72549e-19	DREB1H	OEL15967.1 Dehydration-responsive element-binding protein 1A [Dichanthelium oligosanthes]	-	-	-	-	-	GO:0003700//transcription factor activity, sequence-specific DNA binding	GO:0006355//regulation of transcription, DNA-templated
State 1,2,3,4 -vs- State 1,2,3,5	SK1G00074507	3	1.52227e-54	1.68455e-52	UGT79	EAZ09771.1 hypothetical protein OsI_32058 [Oryza sativa Indica Group]	-	-	-	-	-	GO:0005127//ciliary neurotrophic factor receptor binding;GO:0008194//UDP-glycosyltransferase activity;GO:0016758//transferase activity, transferring hexosyl groups	GO:0043524//negative regulation of neuron apoptotic process;GO:0070120//ciliary neurotrophic factor-mediated signaling pathway
State 1,2,3,4 -vs- State 1,2,3,5	SK1G00074548	5	7.45685e-11	1.6607e-09	Rpp25l	BAF25732.2 Os09g0542000, partial [Oryza sativa Japonica Group]	-	-	-	-	GO:0005634//nucleus	GO:0003676//nucleic acid binding;GO:0003677//DNA binding;GO:0004526//ribonuclease P activity	GO:0006325//chromatin organization;GO:0008033//tRNA processing
State 1,2,3,4 -vs- State 1,2,3,5	SK1G00074550	3	6.59448e-12	1.57743e-10	--	XP_015610604.1 uncharacterized protein LOC4347733 [Oryza sativa Japonica Group]	-	-	-	-	-	-	-
State 1,2,3,4 -vs- State 1,2,3,5	SK1G00074577	1	6.94859e-45	5.89087e-43	--	EAZ09899.1 hypothetical protein OsI_32193 [Oryza sativa Indica Group]	-	-	-	-	-	GO:0003723//RNA binding;GO:0033897//ribonuclease T2 activity	-
State 1,2,3,4 -vs- State 1,2,3,5	SK1G00074633	4	6.78042e-29	3.46553e-27	--	EEC85040.1 hypothetical protein OsI_32357 [Oryza sativa Indica Group]	-	-	-	-	GO:0005634//nucleus;GO:0005759//mitochondrial matrix	GO:0003677//DNA binding	-
State 1,2,3,4 -vs- State 1,2,3,5	SK1G00074642	2	3.39145e-43	2.6951e-41	AAE11	EAZ10040.1 hypothetical protein OsI_32344 [Oryza sativa Indica Group]	-	-	-	-	-	GO:0003987//acetate-CoA ligase activity;GO:0004043//L-aminoadipate-semialdehyde dehydrogenase activity;GO:0008668//(2,3-dihydroxybenzoyl)adenylate synthase activity;GO:0008756//o-succinylbenzoate-CoA ligase activity;GO:0030729//acetoacetate-CoA ligase activity;GO:0047473//D-alanine-poly(phosphoribitol) ligase activity;GO:0050218//propionate-CoA ligase activity	GO:0009234//menaquinone biosynthetic process;GO:0019287//isopentenyl diphosphate biosynthetic process, mevalonate pathway;GO:0019290//siderophore biosynthetic process;GO:0019350//teichoic acid biosynthetic process;GO:0019427//acetyl-CoA biosynthetic process from acetate;GO:0019878//lysine biosynthetic process via aminoadipic acid
State 1,2,3,4 -vs- State 1,2,3,5	SK1G00074658	4	2.61001e-09	5.13644e-08	Os09g0553600	EEC85025.1 hypothetical protein OsI_32326 [Oryza sativa Indica Group]	Metabolism;Metabolism	Global and overview maps;Metabolism of cofactors and vitamins	ko01100//Metabolic pathways;ko00760//Nicotinate and nicotinamide metabolism	K00767;K00767	-	GO:0004514//nicotinate-nucleotide diphosphorylase (carboxylating) activity;GO:0016763//transferase activity, transferring pentosyl groups	GO:0009435//NAD biosynthetic process;GO:0019363//pyridine nucleotide biosynthetic process
State 1,2,3,4 -vs- State 1,2,3,5	SK1G00074660	2	4.95912e-11	1.12131e-09	At1g07660	XP_016507811.1 PREDICTED: uncharacterized protein LOC107825453 [Nicotiana tabacum]	-	-	-	-	GO:0071821//FANCM-MHF complex	GO:0003677//DNA binding	GO:0006352//DNA-templated transcription, initiation
State 1,2,3,4 -vs- State 1,2,3,5	SK1G00074663	2	3.27606e-97	8.9517e-95	--	XP_015610995.1 glutelin type-D 1-like [Oryza sativa Japonica Group]	-	-	-	-	-	-	-
State 1,2,3,4 -vs- State 1,2,3,5	SK1G00074675	2	5.04927e-10	1.05073e-08	B120	EEC85012.1 hypothetical protein OsI_32303 [Oryza sativa Indica Group]	-	-	-	-	-	GO:0004672//protein kinase activity;GO:0004674//protein serine/threonine kinase activity;GO:0005524//ATP binding	GO:0006468//protein phosphorylation;GO:0048544//recognition of pollen
State 1,2,3,4 -vs- State 1,2,3,5	SK1G00074721	2	8.01378e-10	1.63978e-08	PHT3	EAZ09943.1 hypothetical protein OsI_32242 [Oryza sativa Indica Group]	-	-	-	-	-	GO:0016747//transferase activity, transferring acyl groups other than amino-acyl groups	-
State 1,2,3,4 -vs- State 1,2,3,5	SK1G00074725	5	2.43469e-10	5.19431e-09	CYP19-3	XP_015610625.1 peptidyl-prolyl cis-trans isomerase CYP19-3 [Oryza sativa Japonica Group]	-	-	-	-	-	GO:0003755//peptidyl-prolyl cis-trans isomerase activity	GO:0000413//protein peptidyl-prolyl isomerization
State 1,2,3,4 -vs- State 1,2,3,5	SK1G00074726	4	4.20161e-21	1.63114e-19	--	XP_015651383.1 protein SRC2 [Oryza sativa Japonica Group]	-	-	-	-	-	-	-
State 1,2,3,4 -vs- State 1,2,3,5	SK1G00074745	5	3.8342e-47	3.48334e-45	RPS25B	XP_015612251.1 40S ribosomal protein S25-2 [Oryza sativa Japonica Group]	Genetic Information Processing	Translation	ko03010//Ribosome	K02975	-	GO:0003700//transcription factor activity, sequence-specific DNA binding	GO:0006355//regulation of transcription, DNA-templated
State 1,2,3,4 -vs- State 1,2,3,5	SK1G00074747	5	2.30758e-29	1.20015e-27	Ub-CEP52-1	XP_006649691.1 PREDICTED: ubiquitin-60S ribosomal protein L40-2 [Oryza brachyantha]	Genetic Information Processing	Translation	ko03010//Ribosome	K02927	GO:0005840//ribosome	GO:0003735//structural constituent of ribosome;GO:0005515//protein binding	GO:0006289//nucleotide-excision repair;GO:0006412//translation
State 1,2,3,4 -vs- State 1,2,3,5	SK1G00074752	2	8.51793e-69	1.27132e-66	At5g03610	EEC85084.1 hypothetical protein OsI_32442 [Oryza sativa Indica Group]	-	-	-	-	-	GO:0016788//hydrolase activity, acting on ester bonds	-
State 1,2,3,4 -vs- State 1,2,3,5	SK1G00074754	2	5.90036e-44	4.82933e-42	FAR4	XP_015610853.1 putative fatty acyl-CoA reductase 7 [Oryza sativa Japonica Group]	Cellular Processes;Metabolism	Transport and catabolism;Lipid metabolism	ko04146//Peroxisome;ko00073//Cutin, suberine and wax biosynthesis	K13356;K13356	-	GO:0003824//catalytic activity;GO:0003854//3-beta-hydroxy-delta5-steroid dehydrogenase activity;GO:0004043//L-aminoadipate-semialdehyde dehydrogenase activity;GO:0008460//dTDP-glucose 4,6-dehydratase activity;GO:0008831//dTDP-4-dehydrorhamnose reductase activity;GO:0016616//oxidoreductase activity, acting on the CH-OH group of donors, NAD or NADP as acceptor;GO:0016757//transferase activity, tran…	GO:0005975//carbohydrate metabolic process;GO:0006694//steroid biosynthetic process;GO:0009243//O antigen biosynthetic process;GO:0019305//dTDP-rhamnose biosynthetic process;GO:0019878//lysine biosynthetic process via aminoadipic acid;GO:0055114//oxidation-reduction process
State 1,2,3,4 -vs- State 1,2,3,5	SK1G00074770	3	2.91856e-16	9.0465e-15	CP31A	XP_015611613.1 28 kDa ribonucleoprotein, chloroplastic [Oryza sativa Japonica Group]	-	-	-	-	-	GO:0000179//rRNA (adenine-N6,N6-)-dimethyltransferase activity;GO:0003676//nucleic acid binding	GO:0000154//rRNA modification;GO:0008380//RNA splicing
State 1,2,3,4 -vs- State 1,2,3,5	SK1G00074801	4	4.63129e-24	2.01362e-22	UCC1	EEC85105.1 hypothetical protein OsI_32489 [Oryza sativa Indica Group]	-	-	-	-	-	GO:0009055//electron carrier activity	-
State 1,2,3,4 -vs- State 1,2,3,5	SK1G00043848	5	1.77608e-09	3.54239e-08	BTF3	EEC76547.1 hypothetical protein OsI_14347 [Oryza sativa Indica Group]	-	-	-	-	-	-	-
State 1,2,3,4 -vs- State 1,2,3,5	SK1G00043849	5	4.40931e-08	7.66655e-07	TUFA	XP_015630440.1 elongation factor Tu, mitochondrial [Oryza sativa Japonica Group]	Organismal Systems	Environmental adaptation	ko04626//Plant-pathogen interaction	K02358	GO:0005737//cytoplasm;GO:0005840//ribosome	GO:0003735//structural constituent of ribosome;GO:0003743//translation initiation factor activity;GO:0003746//translation elongation factor activity;GO:0003747//translation release factor activity;GO:0003924//GTPase activity;GO:0004781//sulfate adenylyltransferase (ATP) activity;GO:0005525//GTP binding;GO:0008763//UDP-N-acetylmuramate-L-alanine ligase activity	GO:0000103//sulfate assimilation;GO:0001514//selenocysteine incorporation;GO:0006412//translation;GO:0006413//translational initiation;GO:0006414//translational elongation;GO:0006415//translational termination;GO:0006950//response to stress;GO:0009252//peptidoglycan biosynthetic process;GO:0046336//ethanolamine catabolic process
State 1,2,3,4 -vs- State 1,2,3,5	SK1G00043872	5	7.96899e-11	1.76701e-09	--	XP_015631602.1 transmembrane protein 70, mitochondrial [Oryza sativa Japonica Group]	-	-	-	-	-	-	-
State 1,2,3,4 -vs- State 1,2,3,5	SK1G00043875	4	3.18638e-14	8.89132e-13	AGD9	EAY92635.1 hypothetical protein OsI_14379 [Oryza sativa Indica Group]	Cellular Processes	Transport and catabolism	ko04144//Endocytosis	K12493	-	GO:0005096//GTPase activator activity	-
State 1,2,3,4 -vs- State 1,2,3,5	SK1G00043881	1	4.47671e-17	1.44434e-15	RCD1	XP_015630932.1 probable inactive poly [ADP-ribose] polymerase SRO1 [Oryza sativa Japonica Group]	-	-	-	-	-	GO:0003950//NAD+ ADP-ribosyltransferase activity	-
State 1,2,3,4 -vs- State 1,2,3,5	SK1G00043892	5	2.13982e-08	3.85255e-07	--	XP_015629682.1 uncharacterized protein LOC107278565 [Oryza sativa Japonica Group]	-	-	-	-	-	-	-
State 1,2,3,4 -vs- State 1,2,3,5	SK1G00043895	3	8.4478e-63	1.13668e-60	SNF4	XP_015630980.1 sucrose nonfermenting 4-like protein [Oryza sativa Japonica Group]	-	-	-	-	GO:0005840//ribosome;GO:0022626//cytosolic ribosome	GO:0045182//translation regulator activity	GO:0009386//translational attenuation;GO:0044238//primary metabolic process
State 1,2,3,4 -vs- State 1,2,3,5	SK1G00043919	3	4.17175e-08	7.27486e-07	--	XP_015635226.2 uncharacterized protein LOC4325434 [Oryza sativa Japonica Group]	-	-	-	-	-	-	-
State 1,2,3,4 -vs- State 1,2,3,5	SK1G00043945	3	1.50844e-106	4.5409e-104	RPL18	XP_015630413.1 50S ribosomal protein L18, chloroplastic [Oryza sativa Japonica Group]	Genetic Information Processing	Translation	ko03010//Ribosome	K02881	GO:0000315//organellar large ribosomal subunit;GO:0005840//ribosome;GO:0022625//cytosolic large ribosomal subunit	GO:0003735//structural constituent of ribosome	GO:0006412//translation
State 1,2,3,4 -vs- State 1,2,3,5	SK1G00043950	2	5.6358e-59	6.97543e-57	CNR10	EAY92435.1 hypothetical protein OsI_14168 [Oryza sativa Indica Group]	-	-	-	-	-	-	-
State 1,2,3,4 -vs- State 1,2,3,5	SK1G00043952	4	5.34806e-25	2.40778e-23	CNR10	XP_015629327.1 cell number regulator 10 [Oryza sativa Japonica Group]	-	-	-	-	GO:0016021//integral component of membrane	GO:0004252//serine-type endopeptidase activity	-
State 1,2,3,4 -vs- State 1,2,3,5	SK1G00043957	5	6.3907e-09	1.20558e-07	APUM24	XP_015631977.1 pumilio homolog 24 [Oryza sativa Japonica Group]	-	-	-	-	-	GO:0003723//RNA binding	-
State 1,2,3,4 -vs- State 1,2,3,5	SK1G00043991	5	3.89306e-16	1.19112e-14	RZ1A	AAR88583.1 hypothetical protein [Oryza sativa Japonica Group]	Genetic Information Processing	Transcription	ko03040//Spliceosome	K12885	-	GO:0003676//nucleic acid binding;GO:0004523//RNA-DNA hybrid ribonuclease activity;GO:0008270//zinc ion binding	GO:0008380//RNA splicing
State 1,2,3,4 -vs- State 1,2,3,5	SK1G00044010	4	4.89935e-09	9.34665e-08	Os01g0871200	BAS87279.1 Os03g0838800 [Oryza sativa Japonica Group]	-	-	-	-	-	-	-
State 1,2,3,4 -vs- State 1,2,3,5	SK1G00044022	2	4.10354e-36	2.6746e-34	RBK1	XP_015632245.1 serine/threonine-protein kinase pakF [Oryza sativa Japonica Group]	-	-	-	-	-	GO:0004672//protein kinase activity;GO:0005524//ATP binding;GO:0016709//oxidoreductase activity, acting on paired donors, with incorporation or reduction of molecular oxygen, NAD(P)H as one donor, and incorporation of one atom of oxygen	GO:0006468//protein phosphorylation;GO:0006744//ubiquinone biosynthetic process
State 1,2,3,4 -vs- State 1,2,3,5	SK1G00044041	5	1.12823e-40	8.38431e-39	--	EAZ29264.1 hypothetical protein OsJ_13328 [Oryza sativa Japonica Group]	-	-	-	-	-	-	-
State 1,2,3,4 -vs- State 1,2,3,5	SK1G00044042	3	4.81001e-27	2.30271e-25	RPS6	KAB8094426.1 hypothetical protein EE612_021605 [Oryza sativa]	Genetic Information Processing	Translation	ko03010//Ribosome	K02990	GO:0000314//organellar small ribosomal subunit;GO:0005840//ribosome;GO:0022627//cytosolic small ribosomal subunit	GO:0003735//structural constituent of ribosome;GO:0019843//rRNA binding	GO:0006412//translation
State 1,2,3,4 -vs- State 1,2,3,5	SK1G00044079	2	4.17733e-09	8.02526e-08	PAP15	EEC76531.1 hypothetical protein OsI_14321 [Oryza sativa Indica Group]	-	-	-	-	-	GO:0003993//acid phosphatase activity;GO:0016787//hydrolase activity;GO:0046872//metal ion binding	-
State 1,2,3,4 -vs- State 1,2,3,5	SK1G00044082	3	1.46967e-13	3.94004e-12	RIN4	XP_015628179.1 RPM1-interacting protein 4 [Oryza sativa Japonica Group]	Organismal Systems	Environmental adaptation	ko04626//Plant-pathogen interaction	K13456	-	-	-
State 1,2,3,4 -vs- State 1,2,3,5	SK1G00044095	5	1.87584e-86	4.16459e-84	RPS2D	KAB8094099.1 hypothetical protein EE612_021160, partial [Oryza sativa]	Genetic Information Processing	Translation	ko03010//Ribosome	K02981	GO:0000312//plastid small ribosomal subunit;GO:0005840//ribosome;GO:0022627//cytosolic small ribosomal subunit	GO:0003723//RNA binding;GO:0003735//structural constituent of ribosome	GO:0006412//translation
State 1,2,3,4 -vs- State 1,2,3,5	SK1G00044096	3	3.25143e-15	9.54524e-14	RBCX2	XP_015630551.1 chaperonin-like RbcX protein 2, chloroplastic [Oryza sativa Japonica Group]	-	-	-	-	-	-	-
State 1,2,3,4 -vs- State 1,2,3,5	SK1G00044147	4	9.59967e-104	2.84166e-101	NAC002	AIQ84721.1 SNAC1 protein [Oryza sativa f. spontanea]	-	-	-	-	-	GO:0003677//DNA binding	GO:0006355//regulation of transcription, DNA-templated
State 1,2,3,4 -vs- State 1,2,3,5	SK1G00044148	1	2.87612e-17	9.41618e-16	Os03g0815200	XP_015630556.1 probable methylenetetrahydrofolate reductase [Oryza sativa Japonica Group]	Metabolism;Metabolism;Metabolism	Global and overview maps;Global and overview maps;Metabolism of cofactors and vitamins	ko01100//Metabolic pathways;ko01200//Carbon metabolism;ko00670//One carbon pool by folate	K00297;K00297;K00297	-	GO:0004489//methylenetetrahydrofolate reductase (NAD(P)H) activity	GO:0006555//methionine metabolic process;GO:0009086//methionine biosynthetic process;GO:0009396//folic acid-containing compound biosynthetic process;GO:0055114//oxidation-reduction process
State 1,2,3,4 -vs- State 1,2,3,5	SK1G00044149	3	1.78597e-117	5.98502e-115	RPL17	XP_015630559.1 50S ribosomal protein L17, chloroplastic [Oryza sativa Japonica Group]	Genetic Information Processing	Translation	ko03010//Ribosome	K02879	GO:0005762//mitochondrial large ribosomal subunit;GO:0005840//ribosome;GO:0022625//cytosolic large ribosomal subunit	GO:0003735//structural constituent of ribosome	GO:0006412//translation
State 1,2,3,4 -vs- State 1,2,3,5	SK1G00044160	4	1.14472e-31	6.4853e-30	At5g01750	XP_015630153.2 protein LURP-one-related 15 [Oryza sativa Japonica Group]	-	-	-	-	-	-	-
State 1,2,3,4 -vs- State 1,2,3,5	SK1G00044177	5	1.10756e-44	9.25712e-43	RPS23	EAZ14059.1 hypothetical protein OsJ_03983 [Oryza sativa Japonica Group]	Genetic Information Processing	Translation	ko03010//Ribosome	K02973	GO:0000314//organellar small ribosomal subunit;GO:0005840//ribosome;GO:0022627//cytosolic small ribosomal subunit	GO:0003735//structural constituent of ribosome	GO:0006412//translation
State 1,2,3,4 -vs- State 1,2,3,5	SK1G00044188	5	1.17674e-15	3.50671e-14	AZF2	XP_015629244.1 zinc finger protein ZAT12 [Oryza sativa Japonica Group]	-	-	-	-	-	GO:0003824//catalytic activity;GO:0030976//thiamine pyrophosphate binding	-
State 1,2,3,4 -vs- State 1,2,3,5	SK1G00044203	3	7.23183e-14	1.98523e-12	At2g37660	XP_015632967.1 uncharacterized protein At5g02240 [Oryza sativa Japonica Group]	-	-	-	-	-	GO:0003824//catalytic activity;GO:0003854//3-beta-hydroxy-delta5-steroid dehydrogenase activity;GO:0008839//4-hydroxy-tetrahydrodipicolinate reductase;GO:0016616//oxidoreductase activity, acting on the CH-OH group of donors, NAD or NADP as acceptor;GO:0016757//transferase activity, transferring glycosyl groups	GO:0005975//carbohydrate metabolic process;GO:0006694//steroid biosynthetic process;GO:0009089//lysine biosynthetic process via diaminopimelate;GO:0055114//oxidation-reduction process
State 1,2,3,4 -vs- State 1,2,3,5	SK1G00044206	5	6.36562e-14	1.75286e-12	fes1	EAY92384.1 hypothetical protein OsI_14114 [Oryza sativa Indica Group]	Genetic Information Processing	Folding, sorting and degradation	ko04141//Protein processing in endoplasmic reticulum	K09562	GO:0000221//vacuolar proton-transporting V-type ATPase, V1 domain;GO:0005783//endoplasmic reticulum;GO:0030117//membrane coat	GO:0000774//adenyl-nucleotide exchange factor activity;GO:0005515//protein binding;GO:0046961//proton-transporting ATPase activity, rotational mechanism	GO:0006886//intracellular protein transport;GO:0007034//vacuolar transport;GO:0016192//vesicle-mediated transport;GO:1902600//hydrogen ion transmembrane transport
State 1,2,3,4 -vs- State 1,2,3,5	SK1G00044211	2	7.61501e-39	5.29355e-37	--	EEC76433.1 hypothetical protein OsI_14121 [Oryza sativa Indica Group]	-	-	-	-	GO:0005576//extracellular region	GO:0004867//serine-type endopeptidase inhibitor activity	-
State 1,2,3,4 -vs- State 1,2,3,5	SK1G00044243	2	3.91276e-19	1.40677e-17	FLA18	XP_015632406.1 fasciclin-like arabinogalactan protein 16 [Oryza sativa Japonica Group]	-	-	-	-	-	-	-
State 1,2,3,4 -vs- State 1,2,3,5	SK1G00044265	1	2.92988e-16	9.0737e-15	At1g64760	XP_015630594.1 glucan endo-1,3-beta-glucosidase 8 [Oryza sativa Japonica Group]	-	-	-	-	-	GO:0004553//hydrolase activity, hydrolyzing O-glycosyl compounds	GO:0005975//carbohydrate metabolic process
State 1,2,3,4 -vs- State 1,2,3,5	SK1G00044276	5	1.45166e-18	5.04066e-17	RPS18A	XP_015630007.1 40S ribosomal protein S18 [Oryza sativa Japonica Group]	Genetic Information Processing	Translation	ko03010//Ribosome	K02964	GO:0005840//ribosome;GO:0022627//cytosolic small ribosomal subunit	GO:0003723//RNA binding;GO:0003735//structural constituent of ribosome	GO:0006412//translation
State 1,2,3,4 -vs- State 1,2,3,5	SK1G00044294	5	2.78084e-31	1.54345e-29	RPL4	XP_015632250.1 60S ribosomal protein L4 [Oryza sativa Japonica Group]	Genetic Information Processing	Translation	ko03010//Ribosome	K02930	GO:0005840//ribosome;GO:0022625//cytosolic large ribosomal subunit	GO:0003735//structural constituent of ribosome	GO:0006412//translation
State 1,2,3,4 -vs- State 1,2,3,5	SK1G00044308	2	1.40872e-14	4.02902e-13	DRIP2	EEC76338.1 hypothetical protein OsI_13908 [Oryza sativa Indica Group]	-	-	-	-	GO:0005634//nucleus	GO:0046872//metal ion binding;GO:0061630//ubiquitin protein ligase activity	-
State 1,2,3,4 -vs- State 1,2,3,5	SK1G00044312	5	8.99417e-61	1.16178e-58	RPS15	XP_015632818.1 40S ribosomal protein S15-like [Oryza sativa Japonica Group]	Genetic Information Processing	Translation	ko03010//Ribosome	K02958	GO:0000314//organellar small ribosomal subunit;GO:0005840//ribosome;GO:0022627//cytosolic small ribosomal subunit	GO:0003735//structural constituent of ribosome	GO:0006412//translation;GO:0039653//suppression by virus of host transcription
State 1,2,3,4 -vs- State 1,2,3,5	SK1G00044341	3	8.56313e-52	8.79132e-50	--	-	-	-	-	-	-	-	-
State 1,2,3,4 -vs- State 1,2,3,5	SK1G00044373	4	8.96629e-28	4.43594e-26	--	XP_015632673.1 uncharacterized protein LOC4334503 isoform X1 [Oryza sativa Japonica Group]	-	-	-	-	-	GO:0003824//catalytic activity;GO:0005525//GTP binding	GO:0006777//Mo-molybdopterin cofactor biosynthetic process
State 1,2,3,4 -vs- State 1,2,3,5	SK1G00044377	5	4.29089e-10	8.9765e-09	QCR7-2	XP_015628054.1 cytochrome b-c1 complex subunit 7 [Oryza sativa Japonica Group]	Metabolism;Metabolism	Global and overview maps;Energy metabolism	ko01100//Metabolic pathways;ko00190//Oxidative phosphorylation	K00417;K00417	GO:0005750//mitochondrial respiratory chain complex III	-	GO:0006122//mitochondrial electron transport, ubiquinol to cytochrome c
State 1,2,3,4 -vs- State 1,2,3,5	SK1G00044392	3	7.43884e-50	7.23952e-48	RPS9	XP_015628866.1 30S ribosomal protein S9, chloroplastic [Oryza sativa Japonica Group]	Genetic Information Processing	Translation	ko03010//Ribosome	K02996	GO:0005840//ribosome;GO:0022627//cytosolic small ribosomal subunit	GO:0003735//structural constituent of ribosome	GO:0006412//translation
State 1,2,3,4 -vs- State 1,2,3,5	SK1G00044397	5	1.10608e-20	4.22474e-19	HOX10	AAT85055.1 putative homeodomain leucine-zipper protein Hox9 [Oryza sativa Japonica Group]	-	-	-	-	-	GO:0003677//DNA binding	-
State 1,2,3,4 -vs- State 1,2,3,5	SK1G00044420	1	5.90805e-20	2.18838e-18	KIN8B	XP_015628208.1 kinesin-like protein KIN-8B isoform X2 [Oryza sativa Japonica Group]	-	-	-	-	-	GO:0005524//ATP binding;GO:0008017//microtubule binding	GO:0007018//microtubule-based movement
State 1,2,3,4 -vs- State 1,2,3,5	SK1G00044424	5	5.56878e-10	1.15613e-08	At1g79010	XP_015630604.1 NADH-ubiquinone oxidoreductase subunit 8 [Oryza sativa Japonica Group]	Metabolism;Metabolism	Global and overview maps;Energy metabolism	ko01100//Metabolic pathways;ko00190//Oxidative phosphorylation	K03941;K03941	GO:0009425//bacterial-type flagellum basal body;GO:0009507//chloroplast;GO:0009538//photosystem I reaction center;GO:0016020//membrane;GO:0030964//NADH dehydrogenase complex	GO:0000104//succinate dehydrogenase activity;GO:0005506//iron ion binding;GO:0009055//electron carrier activity;GO:0009973//adenylyl-sulfate reductase activity;GO:0016002//sulfite reductase activity;GO:0016695//oxidoreductase activity, acting on hydrogen as donor;GO:0018492//carbon-monoxide dehydrogenase (acceptor) activity;GO:0018551//hydrogensulfite reductase activity;GO:0031679//NADH dehydroge…	GO:0006085//acetyl-CoA biosynthetic process;GO:0006099//tricarboxylic acid cycle;GO:0006790//sulfur compound metabolic process;GO:0006935//chemotaxis;GO:0008616//queuosine biosynthetic process;GO:0009060//aerobic respiration;GO:0009061//anaerobic respiration;GO:0009773//photosynthetic electron transport in photosystem I;GO:0010128//benzoate catabolic process via CoA ligation;GO:0015948//methanoge…
State 1,2,3,4 -vs- State 1,2,3,5	SK1G00044441	4	1.22726e-11	2.88898e-10	TIM14-3	BAS86642.1 Os03g0776900, partial [Oryza sativa Japonica Group]	-	-	-	-	-	GO:0005515//protein binding	GO:0006457//protein folding;GO:0009408//response to heat
State 1,2,3,4 -vs- State 1,2,3,5	SK1G00044447	3	3.43607e-16	1.05768e-14	PSAF	AAC78106.1 photosystem-1 F subunit precursor [Oryza sativa Japonica Group]	Metabolism;Metabolism	Global and overview maps;Energy metabolism	ko01100//Metabolic pathways;ko00195//Photosynthesis	K02694;K02694	GO:0009522//photosystem I;GO:0009538//photosystem I reaction center	-	GO:0015979//photosynthesis
State 1,2,3,4 -vs- State 1,2,3,5	SK1G00044462	5	9.64174e-84	1.99124e-81	--	-	-	-	-	-	GO:0005742//mitochondrial outer membrane translocase complex	GO:0003676//nucleic acid binding;GO:0004527//exonuclease activity	GO:0006605//protein targeting;GO:0006886//intracellular protein transport
State 1,2,3,4 -vs- State 1,2,3,5	SK1G00044500	4	7.20777e-11	1.60624e-09	--	XP_015632403.1 uncharacterized protein LOC4334358 isoform X2 [Oryza sativa Japonica Group]	-	-	-	-	-	-	-
State 1,2,3,4 -vs- State 1,2,3,5	SK1G00044527	1	1.16983e-19	4.29283e-18	BACOVA_02659	XP_015631169.1 uncharacterized protein LOC4334114 [Oryza sativa Japonica Group]	Metabolism;Metabolism;Metabolism;Metabolism;Metabolism	Global and overview maps;Global and overview maps;Biosynthesis of other secondary metabolites;Carbohydrate metabolism;Metabolism of other amino acids	ko01100//Metabolic pathways;ko01110//Biosynthesis of secondary metabolites;ko00940//Phenylpropanoid biosynthesis;ko00500//Starch and sucrose metabolism;ko00460//Cyanoamino acid metabolism	K05349;K05349;K05349;K05349;K05349	-	GO:0004553//hydrolase activity, hydrolyzing O-glycosyl compounds	GO:0005975//carbohydrate metabolic process
State 1,2,3,4 -vs- State 1,2,3,5	SK1G00044537	3	7.4531e-09	1.40005e-07	SSL3	XP_015633337.1 protein STRICTOSIDINE SYNTHASE-LIKE 3 [Oryza sativa Japonica Group]	-	-	-	-	-	GO:0005515//protein binding;GO:0016844//strictosidine synthase activity	GO:0009058//biosynthetic process
State 1,2,3,4 -vs- State 1,2,3,5	SK1G00044558	3	3.29753e-28	1.65913e-26	--	XP_015632120.1 uncharacterized protein LOC4334142 [Oryza sativa Japonica Group]	-	-	-	-	-	-	-
State 1,2,3,4 -vs- State 1,2,3,5	SK1G00044568	5	7.12844e-79	1.312e-76	RPL13AD	XP_015632279.1 60S ribosomal protein L13a-4 [Oryza sativa Japonica Group]	Genetic Information Processing	Translation	ko03010//Ribosome	K02872	GO:0000315//organellar large ribosomal subunit;GO:0005840//ribosome;GO:0022625//cytosolic large ribosomal subunit	GO:0003735//structural constituent of ribosome	GO:0006412//translation
State 1,2,3,4 -vs- State 1,2,3,5	SK1G00044570	5	5.14766e-09	9.80982e-08	PDCB2	XP_015629015.1 PLASMODESMATA CALLOSE-BINDING PROTEIN 2 [Oryza sativa Japonica Group]	-	-	-	-	-	-	-
State 1,2,3,4 -vs- State 1,2,3,5	SK1G00044579	4	1.92731e-14	5.43347e-13	UGD3	XP_015631440.1 UDP-glucose 6-dehydrogenase 3 [Oryza sativa Japonica Group]	Metabolism;Metabolism;Metabolism;Metabolism	Global and overview maps;Carbohydrate metabolism;Carbohydrate metabolism;Carbohydrate metabolism	ko01100//Metabolic pathways;ko00520//Amino sugar and nucleotide sugar metabolism;ko00040//Pentose and glucuronate interconversions;ko00053//Ascorbate and aldarate metabolism	K00012;K00012;K00012;K00012	-	GO:0016491//oxidoreductase activity;GO:0016616//oxidoreductase activity, acting on the CH-OH group of donors, NAD or NADP as acceptor;GO:0050661//NADP binding;GO:0051287//NAD binding	GO:0055114//oxidation-reduction process
State 1,2,3,4 -vs- State 1,2,3,5	SK1G00044587	5	1.2551e-25	5.77509e-24	EIF-5A2	XP_015630967.1 eukaryotic translation initiation factor 5A-2 [Oryza sativa Japonica Group]	-	-	-	-	GO:0005737//cytoplasm	GO:0003723//RNA binding;GO:0003746//translation elongation factor activity;GO:0043022//ribosome binding	GO:0006414//translational elongation;GO:0045901//positive regulation of translational elongation;GO:0045905//positive regulation of translational termination
State 1,2,3,4 -vs- State 1,2,3,5	SK1G00005755	5	3.80792e-08	6.6744e-07	CYP81E9	KVH98297.1 cytochrome P450 [Cynara cardunculus var. scolymus] [Cynara cardunculus]	-	-	-	-	-	GO:0005506//iron ion binding;GO:0016705//oxidoreductase activity, acting on paired donors, with incorporation or reduction of molecular oxygen;GO:0020037//heme binding	GO:0055114//oxidation-reduction process
State 1,2,3,4 -vs- State 1,2,3,5	SK1G00044597	5	1.74543e-10	3.7622e-09	asd	XP_015628377.1 uncharacterized protein LOC4334188 [Oryza sativa Japonica Group]	Metabolism;Metabolism;Metabolism;Metabolism;Metabolism;Metabolism;Metabolism;Metabolism	Global and overview maps;Global and overview maps;Global and overview maps;Amino acid metabolism;Amino acid metabolism;Global and overview maps;Amino acid metabolism;Biosynthesis of other secondary metabolites	ko01100//Metabolic pathways;ko01110//Biosynthesis of secondary metabolites;ko01230//Biosynthesis of amino acids;ko00270//Cysteine and methionine metabolism;ko00260//Glycine, serine and threonine metabolism;ko01210//2-Oxocarboxylic acid metabolism;ko00300//Lysine biosynthesis;ko00261//Monobactam biosynthesis	K00133;K00133;K00133;K00133;K00133;K00133;K00133;K00133	-	GO:0003942//N-acetyl-gamma-glutamyl-phosphate reductase activity;GO:0004073//aspartate-semialdehyde dehydrogenase activity;GO:0016620//oxidoreductase activity, acting on the aldehyde or oxo group of donors, NAD or NADP as acceptor;GO:0046983//protein dimerization activity;GO:0051287//NAD binding;GO:0070402//NADPH binding	GO:0006592//ornithine biosynthetic process;GO:0008652//cellular amino acid biosynthetic process;GO:0009086//methionine biosynthetic process;GO:0009088//threonine biosynthetic process;GO:0009089//lysine biosynthetic process via diaminopimelate;GO:0009097//isoleucine biosynthetic process;GO:0055114//oxidation-reduction process
State 1,2,3,4 -vs- State 1,2,3,5	SK1G00044601	4	1.39675e-08	2.56013e-07	rmt2	AAK63943.1 putative methyltransferase [Oryza sativa Japonica Group]	-	-	-	-	-	GO:0005515//protein binding;GO:0008168//methyltransferase activity	-
State 1,2,3,4 -vs- State 1,2,3,5	SK1G00044603	3	1.1292e-13	3.05261e-12	SBT1.7	XP_015632687.1 subtilisin-like protease SBT1.7 [Oryza sativa Japonica Group]	-	-	-	-	-	GO:0008236//serine-type peptidase activity	GO:0006508//proteolysis;GO:0009306//protein secretion
State 1,2,3,4 -vs- State 1,2,3,5	SK1G00044609	3	9.64297e-70	1.45761e-67	PER35	XP_015628252.1 peroxidase 51 [Oryza sativa Japonica Group]	Metabolism;Metabolism;Metabolism	Global and overview maps;Global and overview maps;Biosynthesis of other secondary metabolites	ko01100//Metabolic pathways;ko01110//Biosynthesis of secondary metabolites;ko00940//Phenylpropanoid biosynthesis	K00430;K00430;K00430	-	GO:0004601//peroxidase activity;GO:0020037//heme binding;GO:0042834//peptidoglycan binding	GO:0006979//response to oxidative stress;GO:0055114//oxidation-reduction process
State 1,2,3,4 -vs- State 1,2,3,5	SK1G00044620	4	3.07305e-12	7.52833e-11	BHLH84	XP_015631804.1 transcription factor BHLH089-like isoform X1 [Oryza sativa Japonica Group]	-	-	-	-	-	GO:0046983//protein dimerization activity	-
State 1,2,3,4 -vs- State 1,2,3,5	SK1G00044634	3	6.57318e-46	5.76525e-44	petM	XP_015630521.1 uncharacterized protein LOC4334225 [Oryza sativa Japonica Group]	-	-	-	-	GO:0009512//cytochrome b6f complex	-	-
State 1,2,3,4 -vs- State 1,2,3,5	SK1G00044658	4	3.12553e-10	6.60469e-09	--	EEC76130.1 hypothetical protein OsI_13413 [Oryza sativa Indica Group]	-	-	-	-	-	GO:0005215//transporter activity	GO:0006810//transport
State 1,2,3,4 -vs- State 1,2,3,5	SK1G00044659	2	8.42458e-38	5.71103e-36	--	XP_015632318.1 proteinase inhibitor PSI-1.2 [Oryza sativa Japonica Group]	-	-	-	-	-	GO:0004867//serine-type endopeptidase inhibitor activity	-
State 1,2,3,4 -vs- State 1,2,3,5	SK1G00044660	5	3.33239e-13	8.69113e-12	rplL	EAY91771.1 hypothetical protein OsI_13415 [Oryza sativa Indica Group]	Genetic Information Processing	Translation	ko03010//Ribosome	K02935	GO:0000315//organellar large ribosomal subunit;GO:0005840//ribosome;GO:0022625//cytosolic large ribosomal subunit	GO:0003735//structural constituent of ribosome	GO:0006412//translation
State 1,2,3,4 -vs- State 1,2,3,5	SK1G00044681	5	1.08499e-15	3.23913e-14	CBSX3	XP_015631769.1 CBS domain-containing protein CBSX3, mitochondrial isoform X2 [Oryza sativa Japonica Group]	-	-	-	-	GO:0009898//cytoplasmic side of plasma membrane;GO:0043190//ATP-binding cassette (ABC) transporter complex;GO:0055052//ATP-binding cassette (ABC) transporter complex, substrate-binding subunit-containing	GO:0003938//IMP dehydrogenase activity;GO:0004122//cystathionine beta-synthase activity;GO:0005524//ATP binding;GO:0015095//magnesium ion transmembrane transporter activity;GO:0015220//choline transmembrane transporter activity;GO:0016853//isomerase activity;GO:0031263//amine-transporting ATPase activity	GO:0005975//carbohydrate metabolic process;GO:0009152//purine ribonucleotide biosynthetic process;GO:0015693//magnesium ion transport;GO:0015837//amine transport;GO:0015871//choline transport;GO:0019344//cysteine biosynthetic process
State 1,2,3,4 -vs- State 1,2,3,5	SK1G00044683	4	2.82006e-09	5.52838e-08	--	EEC76143.1 hypothetical protein OsI_13433 [Oryza sativa Indica Group]	-	-	-	-	-	GO:0016787//hydrolase activity;GO:0016791//phosphatase activity	GO:0008152//metabolic process
State 1,2,3,4 -vs- State 1,2,3,5	SK1G00044686	5	1.26285e-09	2.54735e-08	MIK	KAB8093481.1 hypothetical protein EE612_020315 [Oryza sativa]	Metabolism;Metabolism;Metabolism	Global and overview maps;Global and overview maps;Carbohydrate metabolism	ko01100//Metabolic pathways;ko01110//Biosynthesis of secondary metabolites;ko00562//Inositol phosphate metabolism	K19517;K19517;K19517	-	GO:0004747//ribokinase activity;GO:0008662//1-phosphofructokinase activity;GO:0016773//phosphotransferase activity, alcohol group as acceptor;GO:0047590//5-dehydro-2-deoxygluconokinase activity	GO:0009244//lipopolysaccharide core region biosynthetic process;GO:0019303//D-ribose catabolic process;GO:0019310//inositol catabolic process
State 1,2,3,4 -vs- State 1,2,3,5	SK1G00044691	5	3.92136e-17	1.26978e-15	SHM1	AAP44712.1 putative glycine hydroxymethyltransferase [Oryza sativa Japonica Group]	Metabolism;Metabolism;Metabolism;Metabolism;Metabolism;Metabolism;Metabolism;Metabolism	Global and overview maps;Global and overview maps;Global and overview maps;Global and overview maps;Carbohydrate metabolism;Amino acid metabolism;Metabolism of other amino acids;Metabolism of cofactors and vitamins	ko01100//Metabolic pathways;ko01110//Biosynthesis of secondary metabolites;ko01200//Carbon metabolism;ko01230//Biosynthesis of amino acids;ko00630//Glyoxylate and dicarboxylate metabolism;ko00260//Glycine, serine and threonine metabolism;ko00460//Cyanoamino acid metabolism;ko00670//One carbon pool by folate	K00600;K00600;K00600;K00600;K00600;K00600;K00600;K00600	-	GO:0031071//cysteine desulfurase activity;GO:0033806//fluorothreonine transaldolase activity	GO:0090346//cellular organofluorine metabolic process
State 1,2,3,4 -vs- State 1,2,3,5	SK1G00044692	3	1.29896e-24	5.77492e-23	LOX1.1	EAY91797.1 hypothetical protein OsI_13441 [Oryza sativa Indica Group]	Metabolism	Lipid metabolism	ko00591//Linoleic acid metabolism	K15718	-	GO:0005515//protein binding;GO:0016702//oxidoreductase activity, acting on single donors with incorporation of molecular oxygen, incorporation of two atoms of oxygen;GO:0046872//metal ion binding	GO:0055114//oxidation-reduction process
State 1,2,3,4 -vs- State 1,2,3,5	SK1G00044697	4	2.01901e-54	2.22041e-52	--	XP_015629011.1 uncharacterized protein LOC4334054 [Oryza sativa Japonica Group]	-	-	-	-	-	-	-
State 1,2,3,4 -vs- State 1,2,3,5	SK1G00044705	2	4.30503e-10	9.00078e-09	CYP71D55	EEC76156.1 hypothetical protein OsI_13454 [Oryza sativa Indica Group]	-	-	-	-	-	GO:0005506//iron ion binding;GO:0008191//metalloendopeptidase inhibitor activity;GO:0016705//oxidoreductase activity, acting on paired donors, with incorporation or reduction of molecular oxygen;GO:0020037//heme binding	GO:0055114//oxidation-reduction process
State 1,2,3,4 -vs- State 1,2,3,5	SK1G00044717	3	2.62461e-16	8.14249e-15	Os03g0743400	XP_004981815.1 probable histone H2A variant 3 [Setaria italica]	-	-	-	-	-	GO:0003677//DNA binding	-
State 1,2,3,4 -vs- State 1,2,3,5	SK1G00044730	2	6.41063e-26	2.98061e-24	--	KAF2941274.1 hypothetical protein DAI22_03g335100 [Oryza sativa Japonica Group]	-	-	-	-	-	GO:0016747//transferase activity, transferring acyl groups other than amino-acyl groups	-
State 1,2,3,4 -vs- State 1,2,3,5	SK1G00044733	5	6.29657e-12	1.51228e-10	LFG4	XP_015629242.1 protein LIFEGUARD 2 [Oryza sativa Japonica Group]	-	-	-	-	-	-	-
State 1,2,3,4 -vs- State 1,2,3,5	SK1G00044752	5	1.70694e-08	3.10149e-07	ACT1	XP_015630316.1 actin-1 [Oryza sativa Japonica Group]	-	-	-	-	-	-	-
State 1,2,3,4 -vs- State 1,2,3,5	SK1G00044766	2	2.90665e-19	1.05142e-17	NPF8.3	XP_025879515.1 protein NRT1/ PTR FAMILY 8.3 [Oryza sativa Japonica Group]	-	-	-	-	GO:0016020//membrane	GO:0015333//peptide:proton symporter activity;GO:0022857//transmembrane transporter activity	GO:0015833//peptide transport;GO:0055085//transmembrane transport
State 1,2,3,4 -vs- State 1,2,3,5	SK1G00044768	1	2.84784e-62	3.74671e-60	GAD1	AAM47304.1 putative glutamate carboxylase [Oryza sativa Japonica Group]	Metabolism;Metabolism;Metabolism;Metabolism;Metabolism;Metabolism	Global and overview maps;Global and overview maps;Amino acid metabolism;Metabolism of other amino acids;Carbohydrate metabolism;Metabolism of other amino acids	ko01100//Metabolic pathways;ko01110//Biosynthesis of secondary metabolites;ko00250//Alanine, aspartate and glutamate metabolism;ko00410//beta-Alanine metabolism;ko00650//Butanoate metabolism;ko00430//Taurine and hypotaurine metabolism	K01580;K01580;K01580;K01580;K01580;K01580	-	GO:0004351//glutamate decarboxylase activity;GO:0004837//tyrosine decarboxylase activity;GO:0016831//carboxy-lyase activity;GO:0030170//pyridoxal phosphate binding	GO:0006540//glutamate decarboxylation to succinate;GO:0015940//pantothenate biosynthetic process;GO:0019752//carboxylic acid metabolic process;GO:0051188//cofactor biosynthetic process
State 1,2,3,4 -vs- State 1,2,3,5	SK1G00044798	2	2.44478e-18	8.39066e-17	PDR17	XP_015628270.1 phosphatidylinositol transfer protein PDR17 [Oryza sativa Japonica Group]	-	-	-	-	-	GO:0003677//DNA binding;GO:0003700//transcription factor activity, sequence-specific DNA binding;GO:0016987//sigma factor activity	GO:0006352//DNA-templated transcription, initiation;GO:0006355//regulation of transcription, DNA-templated
State 1,2,3,4 -vs- State 1,2,3,5	SK1G00044813	5	7.38852e-75	1.24386e-72	TUBA1	XP_015630335.1 tubulin alpha-1 chain [Oryza sativa Japonica Group]	Cellular Processes	Transport and catabolism	ko04145//Phagosome	K07374	-	GO:0003924//GTPase activity	-
State 1,2,3,4 -vs- State 1,2,3,5	SK1G00044817	4	2.47839e-09	4.88283e-08	At2g36630	EAY91726.1 hypothetical protein OsI_13369 [Oryza sativa Indica Group]	-	-	-	-	GO:0016021//integral component of membrane	-	-
State 1,2,3,4 -vs- State 1,2,3,5	SK1G00044840	4	4.5557e-17	1.46849e-15	PRXL2B	EAY91739.1 hypothetical protein OsI_13380 [Oryza sativa Indica Group]	-	-	-	-	-	GO:0016209//antioxidant activity;GO:0016491//oxidoreductase activity	GO:0055114//oxidation-reduction process
State 1,2,3,4 -vs- State 1,2,3,5	SK1G00044852	4	4.87226e-18	1.65303e-16	--	XP_015632632.1 uncharacterized protein LOC107277683 [Oryza sativa Japonica Group]	-	-	-	-	-	-	-
State 1,2,3,4 -vs- State 1,2,3,5	SK1G00044863	2	5.16048e-56	5.99054e-54	ISPH	EEC76125.1 hypothetical protein OsI_13396 [Oryza sativa Indica Group]	Metabolism;Metabolism;Metabolism	Global and overview maps;Global and overview maps;Metabolism of terpenoids and polyketides	ko01100//Metabolic pathways;ko01110//Biosynthesis of secondary metabolites;ko00900//Terpenoid backbone biosynthesis	K03527;K03527;K03527	-	GO:0046872//metal ion binding;GO:0051745//4-hydroxy-3-methylbut-2-en-1-yl diphosphate reductase activity	GO:0009240//isopentenyl diphosphate biosynthetic process;GO:0015968//stringent response;GO:0019288//isopentenyl diphosphate biosynthetic process, methylerythritol 4-phosphate pathway;GO:0046677//response to antibiotic;GO:0050992//dimethylallyl diphosphate biosynthetic process
State 1,2,3,4 -vs- State 1,2,3,5	SK1G00044865	4	3.11885e-13	8.16418e-12	Os03g0700700	EAY91532.1 hypothetical protein OsI_13165 [Oryza sativa Indica Group]	Metabolism	Lipid metabolism	ko00591//Linoleic acid metabolism	K15718	-	GO:0005515//protein binding;GO:0016702//oxidoreductase activity, acting on single donors with incorporation of molecular oxygen, incorporation of two atoms of oxygen;GO:0046872//metal ion binding	GO:0055114//oxidation-reduction process
State 1,2,3,4 -vs- State 1,2,3,5	SK1G00044882	1	9.10911e-13	2.3063e-11	BGLU8	OEL24735.1 Beta-glucosidase 8 [Dichanthelium oligosanthes]	Metabolism;Metabolism;Metabolism;Metabolism;Metabolism	Global and overview maps;Global and overview maps;Biosynthesis of other secondary metabolites;Carbohydrate metabolism;Metabolism of other amino acids	ko01100//Metabolic pathways;ko01110//Biosynthesis of secondary metabolites;ko00940//Phenylpropanoid biosynthesis;ko00500//Starch and sucrose metabolism;ko00460//Cyanoamino acid metabolism	K05350;K05350;K05350;K05350;K05350	GO:0009341//beta-galactosidase complex	GO:0004553//hydrolase activity, hydrolyzing O-glycosyl compounds;GO:0004565//beta-galactosidase activity;GO:0042410//6-carboxyhexanoate-CoA ligase activity	GO:0005975//carbohydrate metabolic process;GO:0006012//galactose metabolic process;GO:0009102//biotin biosynthetic process
State 1,2,3,4 -vs- State 1,2,3,5	SK1G00044888	3	8.30233e-71	1.27669e-68	RPS13	EEC76030.1 hypothetical protein OsI_13197 [Oryza sativa Indica Group]	Genetic Information Processing	Translation	ko03010//Ribosome	K02952	GO:0005840//ribosome;GO:0016021//integral component of membrane;GO:0022627//cytosolic small ribosomal subunit	GO:0003723//RNA binding;GO:0003735//structural constituent of ribosome	GO:0006412//translation
State 1,2,3,4 -vs- State 1,2,3,5	SK1G00044930	2	2.38774e-87	5.47209e-85	GF14F	XP_015631133.1 14-3-3-like protein GF14-F isoform X2 [Oryza sativa Japonica Group]	-	-	-	-	-	-	-
State 1,2,3,4 -vs- State 1,2,3,5	SK1G00044978	4	3.19218e-19	1.15236e-17	At3g17800	XP_015630315.1 UV-B-induced protein At3g17800, chloroplastic [Oryza sativa Japonica Group]	-	-	-	-	-	-	-
State 1,2,3,4 -vs- State 1,2,3,5	SK1G00044994	3	3.20018e-09	6.23228e-08	--	EEC75954.1 hypothetical protein OsI_13058 [Oryza sativa Indica Group]	-	-	-	-	-	-	-
State 1,2,3,4 -vs- State 1,2,3,5	SK1G00044998	2	1.7248e-17	5.71532e-16	GGP3	XP_015628523.1 gamma-glutamyl peptidase 3 [Oryza sativa Japonica Group]	-	-	-	-	GO:0005951//carbamoyl-phosphate synthase complex	GO:0000107//imidazoleglycerol-phosphate synthase activity;GO:0003824//catalytic activity;GO:0003922//GMP synthase (glutamine-hydrolyzing) activity;GO:0004088//carbamoyl-phosphate synthase (glutamine-hydrolyzing) activity;GO:0004642//phosphoribosylformylglycinamidine synthase activity;GO:0008899//homoserine O-succinyltransferase activity;GO:0016787//hydrolase activity;GO:0016884//carbon-nitrogen l…	GO:0000105//histidine biosynthetic process;GO:0006177//GMP biosynthetic process;GO:0009086//methionine biosynthetic process;GO:0009152//purine ribonucleotide biosynthetic process;GO:0009220//pyrimidine ribonucleotide biosynthetic process
State 1,2,3,4 -vs- State 1,2,3,5	SK1G00045034	2	3.67375e-186	2.41665e-183	HIPL1	XP_015632377.1 HIPL1 protein [Oryza sativa Japonica Group]	-	-	-	-	-	-	-
State 1,2,3,4 -vs- State 1,2,3,5	SK1G00045043	2	2.11162e-70	3.21927e-68	--	BAS85855.1 Os03g0692700 [Oryza sativa Japonica Group]	-	-	-	-	-	-	-
State 1,2,3,4 -vs- State 1,2,3,5	SK1G00045044	2	3.63705e-48	3.37324e-46	--	EAY91475.1 hypothetical protein OsI_13105 [Oryza sativa Indica Group]	-	-	-	-	-	-	-
State 1,2,3,4 -vs- State 1,2,3,5	SK1G00045053	4	1.78529e-28	9.04664e-27	Os03g0693900	XP_015629893.1 germin-like protein 3-5 [Oryza sativa Japonica Group]	-	-	-	-	-	-	GO:0006355//regulation of transcription, DNA-templated
State 1,2,3,4 -vs- State 1,2,3,5	SK1G00045075	1	1.25691e-18	4.39015e-17	At3g11230	XP_015632926.1 protein yippee-like [Oryza sativa Japonica Group]	-	-	-	-	-	-	-
State 1,2,3,4 -vs- State 1,2,3,5	SK1G00045078	1	8.0201e-14	2.18978e-12	ACER	XP_015632788.1 alkaline ceramidase [Oryza sativa Japonica Group]	Metabolism;Metabolism	Global and overview maps;Lipid metabolism	ko01100//Metabolic pathways;ko00600//Sphingolipid metabolism	K04711;K04711	GO:0016021//integral component of membrane	GO:0016811//hydrolase activity, acting on carbon-nitrogen (but not peptide) bonds, in linear amides	GO:0006672//ceramide metabolic process
State 1,2,3,4 -vs- State 1,2,3,5	SK1G00045081	5	6.52618e-12	1.5632e-10	PES	XP_015631171.1 pescadillo homolog [Oryza sativa Japonica Group]	-	-	-	-	GO:0005730//nucleolus	-	GO:0042254//ribosome biogenesis
State 1,2,3,4 -vs- State 1,2,3,5	SK1G00045086	2	9.55965e-51	9.48542e-49	--	ABF98383.1 expressed protein [Oryza sativa Japonica Group]	-	-	-	-	-	-	-
State 1,2,3,4 -vs- State 1,2,3,5	SK1G00045135	5	3.92701e-78	7.08098e-76	RBG7	EEC75898.1 hypothetical protein OsI_12955 [Oryza sativa Indica Group]	-	-	-	-	-	GO:0003676//nucleic acid binding	GO:0008380//RNA splicing
State 1,2,3,4 -vs- State 1,2,3,5	SK1G00045149	2	2.03999e-203	1.61032e-200	--	BAH92308.1 Os03g0673100 [Oryza sativa Japonica Group]	-	-	-	-	-	-	-
State 1,2,3,4 -vs- State 1,2,3,5	SK1G00045152	2	5.48773e-213	4.64131e-210	--	EAY91357.1 hypothetical protein OsI_12977 [Oryza sativa Indica Group]	-	-	-	-	-	-	-
State 1,2,3,4 -vs- State 1,2,3,5	SK1G00045168	4	1.2683e-16	4.00113e-15	--	EAY91376.1 hypothetical protein OsI_12996 [Oryza sativa Indica Group]	-	-	-	-	-	-	-
State 1,2,3,4 -vs- State 1,2,3,5	SK1G00045179	5	7.89181e-21	3.03719e-19	--	-	-	-	-	-	-	-	-
State 1,2,3,4 -vs- State 1,2,3,5	SK1G00045187	2	8.72714e-64	1.18776e-61	BLH7	AAS18416.1 benzothiadiazole-induced homeodomain protein 1 [Oryza sativa Indica Group]	-	-	-	-	-	GO:0003677//DNA binding	GO:0006355//regulation of transcription, DNA-templated
State 1,2,3,4 -vs- State 1,2,3,5	SK1G00045190	2	1.59196e-11	3.71548e-10	UBC18	XP_015633199.1 probable ubiquitin-conjugating enzyme E2 18 [Oryza sativa Japonica Group]	Genetic Information Processing	Folding, sorting and degradation	ko04120//Ubiquitin mediated proteolysis	K10688	-	GO:0005515//protein binding;GO:0061657//UFM1 conjugating enzyme activity	GO:0006464//cellular protein modification process;GO:0015031//protein transport;GO:0071569//protein ufmylation
State 1,2,3,4 -vs- State 1,2,3,5	SK1G00045212	2	1.47865e-09	2.96918e-08	OsI_12825	XP_015631498.1 probable E3 ubiquitin-protein ligase BAH1-like 1 isoform X1 [Oryza sativa Japonica Group]	-	-	-	-	GO:0000109//nucleotide-excision repair complex	GO:0008270//zinc ion binding;GO:0046872//metal ion binding	GO:0006289//nucleotide-excision repair
State 1,2,3,4 -vs- State 1,2,3,5	SK1G00045213	3	1.56581e-22	6.40792e-21	GATC	XP_015628845.1 glutamyl-tRNA(Gln) amidotransferase subunit C, chloroplastic/mitochondrial [Oryza sativa Japonica Group]	Metabolism;Genetic Information Processing	Global and overview maps;Translation	ko01100//Metabolic pathways;ko00970//Aminoacyl-tRNA biosynthesis	K02435;K02435	GO:0030956//glutamyl-tRNA(Gln) amidotransferase complex	GO:0050567//glutaminyl-tRNA synthase (glutamine-hydrolyzing) activity	GO:0006424//glutamyl-tRNA aminoacylation;GO:0006450//regulation of translational fidelity
State 1,2,3,4 -vs- State 1,2,3,5	SK1G00045243	1	3.80863e-08	6.6744e-07	--	ABR25707.1 dehydrin 13, partial [Oryza sativa Indica Group]	-	-	-	-	-	-	-
State 1,2,3,4 -vs- State 1,2,3,5	SK1G00045285	2	4.08664e-82	8.0202e-80	Zlp	OEL24610.1 Zeamatin [Dichanthelium oligosanthes]	-	-	-	-	-	GO:0008233//peptidase activity	GO:0006508//proteolysis;GO:0016032//viral process
State 1,2,3,4 -vs- State 1,2,3,5	SK1G00045333	4	1.16163e-08	2.14915e-07	--	XP_015629088.1 putative F-box/LRR-repeat protein 9 [Oryza sativa Japonica Group]	-	-	-	-	GO:0005575//cellular_component	GO:0003674//molecular_function;GO:0005515//protein binding	GO:0030243//cellulose metabolic process
State 1,2,3,4 -vs- State 1,2,3,5	SK1G00045408	4	1.4446e-36	9.55589e-35	Os03g0617900	EEC75742.1 hypothetical protein OsI_12624 [Oryza sativa Indica Group]	Metabolism;Metabolism;Metabolism;Metabolism;Metabolism	Global and overview maps;Global and overview maps;Global and overview maps;Global and overview maps;Amino acid metabolism	ko01100//Metabolic pathways;ko01110//Biosynthesis of secondary metabolites;ko01230//Biosynthesis of amino acids;ko01210//2-Oxocarboxylic acid metabolism;ko00220//Arginine biosynthesis	K00145;K00145;K00145;K00145;K00145	-	GO:0003824//catalytic activity;GO:0003942//N-acetyl-gamma-glutamyl-phosphate reductase activity;GO:0004073//aspartate-semialdehyde dehydrogenase activity;GO:0008839//4-hydroxy-tetrahydrodipicolinate reductase;GO:0016491//oxidoreductase activity;GO:0016620//oxidoreductase activity, acting on the aldehyde or oxo group of donors, NAD or NADP as acceptor;GO:0046983//protein dimerization activity;GO:0…	GO:0006592//ornithine biosynthetic process;GO:0006813//potassium ion transport;GO:0008652//cellular amino acid biosynthetic process;GO:0009086//methionine biosynthetic process;GO:0009088//threonine biosynthetic process;GO:0009089//lysine biosynthetic process via diaminopimelate;GO:0009097//isoleucine biosynthetic process;GO:0055114//oxidation-reduction process
State 1,2,3,4 -vs- State 1,2,3,5	SK1G00045409	4	3.75944e-25	1.70335e-23	At3g11180	EAY91020.1 hypothetical protein OsI_12626 [Oryza sativa Indica Group]	-	-	-	-	-	GO:0016491//oxidoreductase activity	GO:0055114//oxidation-reduction process
State 1,2,3,4 -vs- State 1,2,3,5	SK1G00045483	2	4.94116e-46	4.36617e-44	GDPD6	XP_015627990.1 glycerophosphodiester phosphodiesterase GDPD6 [Oryza sativa Japonica Group]	Metabolism	Lipid metabolism	ko00564//Glycerophospholipid metabolism	K01126	-	GO:0008081//phosphoric diester hydrolase activity	GO:0006629//lipid metabolic process
State 1,2,3,4 -vs- State 1,2,3,5	SK1G00045496	5	2.13853e-23	9.07587e-22	--	EAY90941.1 hypothetical protein OsI_12555 [Oryza sativa Indica Group]	-	-	-	-	-	-	-
State 1,2,3,4 -vs- State 1,2,3,5	SK1G00045545	3	9.33363e-66	1.32091e-63	--	EAZ27632.1 hypothetical protein OsJ_11576 [Oryza sativa Japonica Group]	-	-	-	-	-	-	-
State 1,2,3,4 -vs- State 1,2,3,5	SK1G00045549	5	4.45373e-15	1.30103e-13	Os03g0586800	XP_015631466.1 lysine--tRNA ligase [Oryza sativa Japonica Group]	Genetic Information Processing	Translation	ko00970//Aminoacyl-tRNA biosynthesis	K04567	GO:0005737//cytoplasm;GO:0009328//phenylalanine-tRNA ligase complex	GO:0000049//tRNA binding;GO:0000166//nucleotide binding;GO:0003676//nucleic acid binding;GO:0004812//aminoacyl-tRNA ligase activity;GO:0004815//aspartate-tRNA ligase activity;GO:0004816//asparagine-tRNA ligase activity;GO:0004824//lysine-tRNA ligase activity;GO:0004826//phenylalanine-tRNA ligase activity;GO:0005524//ATP binding;GO:0043767//pyrrolysyl-tRNA synthetase activity;GO:0050560//aspartate…	GO:0006418//tRNA aminoacylation for protein translation;GO:0006421//asparaginyl-tRNA aminoacylation;GO:0006422//aspartyl-tRNA aminoacylation;GO:0006430//lysyl-tRNA aminoacylation;GO:0006432//phenylalanyl-tRNA aminoacylation;GO:0043039//tRNA aminoacylation
State 1,2,3,4 -vs- State 1,2,3,5	SK1G00045578	3	7.19513e-45	6.08537e-43	OsI_012078	XP_015632068.1 chlorophyll a-b binding protein, chloroplastic [Oryza sativa Japonica Group]	Metabolism;Metabolism	Global and overview maps;Energy metabolism	ko01100//Metabolic pathways;ko00196//Photosynthesis - antenna proteins	K08913;K08913	-	-	-
State 1,2,3,4 -vs- State 1,2,3,5	SK1G00045615	5	4.70251e-52	4.87005e-50	RPL15	XP_015632743.1 60S ribosomal protein L15 [Oryza sativa Japonica Group]	Genetic Information Processing	Translation	ko03010//Ribosome	K02877	GO:0005840//ribosome	GO:0003735//structural constituent of ribosome	GO:0006412//translation
State 1,2,3,4 -vs- State 1,2,3,5	SK1G00045620	4	2.65554e-129	1.00351e-126	UAM1	XP_015631326.1 UDP-arabinopyranose mutase 1 [Oryza sativa Japonica Group]	Metabolism;Metabolism	Global and overview maps;Carbohydrate metabolism	ko01100//Metabolic pathways;ko00520//Amino sugar and nucleotide sugar metabolism	K13379;K13379	-	-	-
State 1,2,3,4 -vs- State 1,2,3,5	SK1G00045633	1	1.33832e-20	5.08446e-19	--	XP_020152323.1 uncharacterized protein LOC109737606 [Aegilops tauschii subsp. tauschii] [Aegilops tauschii]	-	-	-	-	-	-	-
State 1,2,3,4 -vs- State 1,2,3,5	SK1G00045641	2	1.06245e-24	4.74124e-23	DTX40	ABF97220.1 MATE efflux family protein, expressed [Oryza sativa Japonica Group]	-	-	-	-	GO:0016020//membrane	GO:0015238//drug transmembrane transporter activity;GO:0015297//antiporter activity;GO:0042910//xenobiotic transporter activity	GO:0006855//drug transmembrane transport;GO:0042493//response to drug;GO:0055085//transmembrane transport
State 1,2,3,4 -vs- State 1,2,3,5	SK1G00045659	5	4.00907e-71	6.21879e-69	RPL13B	XP_015632652.1 60S ribosomal protein L13-2 [Oryza sativa Japonica Group]	Genetic Information Processing	Translation	ko03010//Ribosome	K02873	GO:0005840//ribosome	GO:0003735//structural constituent of ribosome;GO:0016655//oxidoreductase activity, acting on NAD(P)H, quinone or similar compound as acceptor	GO:0006412//translation;GO:0006814//sodium ion transport;GO:0055114//oxidation-reduction process
State 1,2,3,4 -vs- State 1,2,3,5	SK1G00045661	5	3.55257e-94	8.94996e-92	RPS3B	XP_015632349.1 40S ribosomal protein S3-2 [Oryza sativa Japonica Group]	Genetic Information Processing	Translation	ko03010//Ribosome	K02985	GO:0000312//plastid small ribosomal subunit;GO:0022627//cytosolic small ribosomal subunit	GO:0003723//RNA binding;GO:0003735//structural constituent of ribosome	GO:0006412//translation
State 1,2,3,4 -vs- State 1,2,3,5	SK1G00045677	5	1.25317e-42	9.76207e-41	RPL19C	EAY90757.1 hypothetical protein OsI_12360 [Oryza sativa Indica Group]	Genetic Information Processing	Translation	ko03010//Ribosome	K02885	GO:0005840//ribosome	GO:0003735//structural constituent of ribosome	GO:0006412//translation
State 1,2,3,4 -vs- State 1,2,3,5	SK1G00045709	2	2.2217e-14	6.24856e-13	SD18	EAY90640.1 hypothetical protein OsI_12243 [Oryza sativa Indica Group]	-	-	-	-	-	GO:0004672//protein kinase activity;GO:0004674//protein serine/threonine kinase activity;GO:0005524//ATP binding	GO:0006468//protein phosphorylation;GO:0048544//recognition of pollen
State 1,2,3,4 -vs- State 1,2,3,5	SK1G00045713	2	3.90899e-72	6.28305e-70	--	-	-	-	-	-	GO:0005789//endoplasmic reticulum membrane	-	GO:0034599//cellular response to oxidative stress
State 1,2,3,4 -vs- State 1,2,3,5	SK1G00045731	3	2.94856e-09	5.76755e-08	CHLI	A2XIK9.1 RecName: Full=Magnesium-chelatase subunit ChlI, chloroplastic; Short=Mg-chelatase subunit I; AltName: Full=Mg-protoporphyrin IX chelatase subunit ChlI; AltName: Full=Protein CHLORINA 9; Flags: Precursor [Oryza sativa Indica Group]	Metabolism;Metabolism;Metabolism	Global and overview maps;Global and overview maps;Metabolism of cofactors and vitamins	ko01100//Metabolic pathways;ko01110//Biosynthesis of secondary metabolites;ko00860//Porphyrin and chlorophyll metabolism	K03405;K03405;K03405	GO:0009360//DNA polymerase III complex;GO:0010007//magnesium chelatase complex	GO:0003677//DNA binding;GO:0003887//DNA-directed DNA polymerase activity;GO:0004176//ATP-dependent peptidase activity;GO:0004252//serine-type endopeptidase activity;GO:0004386//helicase activity;GO:0005524//ATP binding;GO:0008134//transcription factor binding;GO:0016851//magnesium chelatase activity;GO:0016887//ATPase activity	GO:0006260//DNA replication;GO:0006355//regulation of transcription, DNA-templated;GO:0006508//proteolysis;GO:0009306//protein secretion;GO:0015995//chlorophyll biosynthetic process;GO:0030436//asexual sporulation;GO:0032508//DNA duplex unwinding;GO:0043107//type IV pilus-dependent motility
State 1,2,3,4 -vs- State 1,2,3,5	SK1G00045742	1	5.892e-12	1.41799e-10	TOM1	XP_015632737.1 tobamovirus multiplication protein 1 [Oryza sativa Japonica Group]	-	-	-	-	-	-	-
State 1,2,3,4 -vs- State 1,2,3,5	SK1G00045764	4	4.50095e-10	9.39934e-09	BUB3.1	EEC75559.1 hypothetical protein OsI_12223 [Oryza sativa Indica Group]	-	-	-	-	-	GO:0005515//protein binding	GO:0055085//transmembrane transport
State 1,2,3,4 -vs- State 1,2,3,5	SK1G00045778	3	2.43032e-103	7.01869e-101	rps5	EAY90626.1 hypothetical protein OsI_12226 [Oryza sativa Indica Group]	Genetic Information Processing	Translation	ko03010//Ribosome	K02988	GO:0000312//plastid small ribosomal subunit;GO:0005840//ribosome;GO:0022627//cytosolic small ribosomal subunit	GO:0003723//RNA binding;GO:0003735//structural constituent of ribosome	GO:0006412//translation
State 1,2,3,4 -vs- State 1,2,3,5	SK1G00045815	2	7.54683e-32	4.29613e-30	AOC	XP_015632351.1 allene oxide cyclase, chloroplastic [Oryza sativa Japonica Group]	Metabolism;Metabolism;Metabolism	Global and overview maps;Global and overview maps;Lipid metabolism	ko01100//Metabolic pathways;ko01110//Biosynthesis of secondary metabolites;ko00592//alpha-Linolenic acid metabolism	K10525;K10525;K10525	-	GO:0016853//isomerase activity	-
State 1,2,3,4 -vs- State 1,2,3,5	SK1G00045820	4	7.25002e-47	6.51988e-45	--	XP_015629216.1 uncharacterized protein LOC4333206 [Oryza sativa Japonica Group]	-	-	-	-	-	-	-
State 1,2,3,4 -vs- State 1,2,3,5	SK1G00045881	5	8.77935e-23	3.63473e-21	RPS19A	XP_015630639.1 40S ribosomal protein S19-like [Oryza sativa Japonica Group]	Genetic Information Processing	Translation	ko03010//Ribosome	K02966	GO:0005840//ribosome	GO:0003735//structural constituent of ribosome	GO:0006412//translation
State 1,2,3,4 -vs- State 1,2,3,5	SK1G00045884	5	1.28355e-80	2.46455e-78	RPS19A	XP_015630639.1 40S ribosomal protein S19-like [Oryza sativa Japonica Group]	Genetic Information Processing	Translation	ko03010//Ribosome	K02966	GO:0005840//ribosome	GO:0003735//structural constituent of ribosome	GO:0006412//translation
State 1,2,3,4 -vs- State 1,2,3,5	SK1G00045903	4	3.40917e-09	6.61752e-08	Os03g0429000	XP_015628386.1 cysteine proteinase inhibitor 8 [Oryza sativa Japonica Group]	-	-	-	-	-	GO:0004869//cysteine-type endopeptidase inhibitor activity	-
State 1,2,3,4 -vs- State 1,2,3,5	SK1G00045922	2	1.0928e-19	4.0143e-18	--	EAY90561.1 hypothetical protein OsI_12161 [Oryza sativa Indica Group]	-	-	-	-	-	-	-
State 1,2,3,4 -vs- State 1,2,3,5	SK1G00045927	5	5.25163e-10	1.09156e-08	179B	EAY90376.1 hypothetical protein OsI_11954 [Oryza sativa Indica Group]	Genetic Information Processing	Translation	ko03010//Ribosome	K02998	GO:0000314//organellar small ribosomal subunit;GO:0005840//ribosome;GO:0022627//cytosolic small ribosomal subunit	GO:0003735//structural constituent of ribosome	GO:0006412//translation
State 1,2,3,4 -vs- State 1,2,3,5	SK1G00045963	5	4.45303e-23	1.86975e-21	RPL27AC	XP_015632850.1 60S ribosomal protein L27a-3 [Oryza sativa Japonica Group]	Genetic Information Processing	Translation	ko03010//Ribosome	K02900	GO:0000315//organellar large ribosomal subunit;GO:0022625//cytosolic large ribosomal subunit	GO:0003735//structural constituent of ribosome	GO:0006412//translation
State 1,2,3,4 -vs- State 1,2,3,5	SK1G00045975	5	2.91243e-20	1.08558e-18	At2g23930	XP_015627963.1 probable small nuclear ribonucleoprotein G [Oryza sativa Japonica Group]	Genetic Information Processing	Transcription	ko03040//Spliceosome	K11099	-	GO:0008666//2,3,4,5-tetrahydropyridine-2,6-dicarboxylate N-succinyltransferase activity	-
State 1,2,3,4 -vs- State 1,2,3,5	SK1G00045984	2	1.3548e-13	3.63758e-12	ZIP2	XP_015628224.1 zinc transporter 2 [Oryza sativa Japonica Group]	-	-	-	-	GO:0016020//membrane	GO:0046873//metal ion transmembrane transporter activity	GO:0030001//metal ion transport;GO:0055085//transmembrane transport
State 1,2,3,4 -vs- State 1,2,3,5	SK1G00046079	4	4.49763e-18	1.53031e-16	RLK902	XP_006651449.1 PREDICTED: probable inactive receptor kinase At4g23740 [Oryza brachyantha]	-	-	-	-	-	GO:0004672//protein kinase activity;GO:0005524//ATP binding	GO:0006468//protein phosphorylation
State 1,2,3,4 -vs- State 1,2,3,5	SK1G00046089	1	5.7136e-41	4.27281e-39	TPP9	XP_015628649.1 probable trehalose-phosphate phosphatase 9 [Oryza sativa Japonica Group]	Metabolism;Metabolism;Metabolism	Global and overview maps;Global and overview maps;Carbohydrate metabolism	ko01100//Metabolic pathways;ko01110//Biosynthesis of secondary metabolites;ko00500//Starch and sucrose metabolism	K01087;K01087;K01087	-	GO:0003824//catalytic activity;GO:0004805//trehalose-phosphatase activity;GO:0016787//hydrolase activity	GO:0005992//trehalose biosynthetic process;GO:0008152//metabolic process
State 1,2,3,4 -vs- State 1,2,3,5	SK1G00046115	4	1.36164e-18	4.74663e-17	DAHPS1	KAB8092054.1 hypothetical protein EE612_017811 [Oryza sativa]	Metabolism;Metabolism;Metabolism;Metabolism	Global and overview maps;Global and overview maps;Global and overview maps;Amino acid metabolism	ko01100//Metabolic pathways;ko01110//Biosynthesis of secondary metabolites;ko01230//Biosynthesis of amino acids;ko00400//Phenylalanine, tyrosine and tryptophan biosynthesis	K01626;K01626;K01626;K01626	-	GO:0003849//3-deoxy-7-phosphoheptulonate synthase activity	GO:0009073//aromatic amino acid family biosynthetic process;GO:0009423//chorismate biosynthetic process
State 1,2,3,4 -vs- State 1,2,3,5	SK1G00046116	5	7.99785e-79	1.46443e-76	rps6	EAY90299.1 hypothetical protein OsI_11874 [Oryza sativa Indica Group]	Genetic Information Processing	Translation	ko03010//Ribosome	K02991	GO:0005840//ribosome	GO:0003735//structural constituent of ribosome	GO:0006412//translation
State 1,2,3,4 -vs- State 1,2,3,5	SK1G00046117	3	9.16871e-25	4.1019e-23	SAPK1	EEC75392.1 hypothetical protein OsI_11876 [Oryza sativa Indica Group]	Environmental Information Processing;Environmental Information Processing	Signal transduction;Signal transduction	ko04075//Plant hormone signal transduction;ko04016//MAPK signaling pathway - plant	K14498;K14498	-	GO:0004672//protein kinase activity;GO:0005524//ATP binding	GO:0006468//protein phosphorylation
State 1,2,3,4 -vs- State 1,2,3,5	SK1G00046118	5	6.20914e-26	2.89071e-24	COX6B-1	XP_015630536.1 cytochrome c oxidase subunit 6b-1 [Oryza sativa Japonica Group]	Metabolism;Metabolism	Global and overview maps;Energy metabolism	ko01100//Metabolic pathways;ko00190//Oxidative phosphorylation	K02267;K02267	GO:0005739//mitochondrion;GO:0045277//respiratory chain complex IV	-	-
State 1,2,3,4 -vs- State 1,2,3,5	SK1G00046119	4	2.03429e-12	5.03918e-11	HTR4	RDX80863.1 hypothetical protein CR513_38538, partial [Mucuna pruriens]	-	-	-	-	GO:0071821//FANCM-MHF complex	GO:0003677//DNA binding	GO:0006352//DNA-templated transcription, initiation
State 1,2,3,4 -vs- State 1,2,3,5	SK1G00046140	4	1.07558e-09	2.182e-08	SCPL51	AAP04191.1 putative serine carboxypeptidase [Oryza sativa Japonica Group]	-	-	-	-	-	GO:0003991//acetylglutamate kinase activity;GO:0004185//serine-type carboxypeptidase activity	GO:0006508//proteolysis;GO:0006592//ornithine biosynthetic process
State 1,2,3,4 -vs- State 1,2,3,5	SK1G00046170	2	3.16535e-10	6.68486e-09	At1g28600	TVU46913.1 hypothetical protein EJB05_06486, partial [Eragrostis curvula]	-	-	-	-	-	GO:0016788//hydrolase activity, acting on ester bonds;GO:0018802//2,4-dihydroxyhept-2-ene-1,7-dioate aldolase activity	-
State 1,2,3,4 -vs- State 1,2,3,5	SK1G00046182	1	3.14248e-09	6.12998e-08	--	EEC75332.1 hypothetical protein OsI_11724 [Oryza sativa Indica Group]	-	-	-	-	-	-	GO:0030163//protein catabolic process
State 1,2,3,4 -vs- State 1,2,3,5	SK1G00046222	4	2.75688e-09	5.41647e-08	At3g13620	XP_015631239.1 probable polyamine transporter At3g13620 [Oryza sativa Japonica Group]	-	-	-	-	GO:0016020//membrane;GO:0016021//integral component of membrane	GO:0015171//amino acid transmembrane transporter activity;GO:0022857//transmembrane transporter activity	GO:0006865//amino acid transport;GO:0055085//transmembrane transport
State 1,2,3,4 -vs- State 1,2,3,5	SK1G00046224	5	1.24734e-13	3.3592e-12	CGS1	XP_015631238.1 cystathionine gamma-synthase 1, chloroplastic [Oryza sativa Japonica Group]	Metabolism;Metabolism;Metabolism;Metabolism;Metabolism;Metabolism	Global and overview maps;Global and overview maps;Global and overview maps;Amino acid metabolism;Energy metabolism;Metabolism of other amino acids	ko01100//Metabolic pathways;ko01110//Biosynthesis of secondary metabolites;ko01230//Biosynthesis of amino acids;ko00270//Cysteine and methionine metabolism;ko00920//Sulfur metabolism;ko00450//Selenocompound metabolism	K01739;K01739;K01739;K01739;K01739;K01739	-	GO:0003824//catalytic activity;GO:0003961//O-acetylhomoserine aminocarboxypropyltransferase activity;GO:0004121//cystathionine beta-lyase activity;GO:0004124//cysteine synthase activity;GO:0008710//8-amino-7-oxononanoate synthase activity;GO:0016765//transferase activity, transferring alkyl or aryl (other than methyl) groups;GO:0016829//lyase activity;GO:0016835//carbon-oxygen lyase activity;GO:0…	GO:0006520//cellular amino acid metabolic process;GO:0008652//cellular amino acid biosynthetic process;GO:0009086//methionine biosynthetic process;GO:0009087//methionine catabolic process;GO:0009093//cysteine catabolic process;GO:0009102//biotin biosynthetic process;GO:0019344//cysteine biosynthetic process;GO:0019346//transsulfuration;GO:0019413//acetate biosynthetic process
State 1,2,3,4 -vs- State 1,2,3,5	SK1G00046226	3	5.23773e-10	1.08931e-08	CP29B	EAY90218.1 hypothetical protein OsI_11785 [Oryza sativa Indica Group]	-	-	-	-	-	GO:0003676//nucleic acid binding	GO:0008380//RNA splicing
State 1,2,3,4 -vs- State 1,2,3,5	SK1G00046267	3	1.15756e-11	2.73396e-10	RPL6	EAZ26952.1 hypothetical protein OsJ_10878 [Oryza sativa Japonica Group]	Genetic Information Processing	Translation	ko03010//Ribosome	K02933	GO:0005840//ribosome;GO:0022625//cytosolic large ribosomal subunit	GO:0003735//structural constituent of ribosome;GO:0019843//rRNA binding	GO:0006412//translation
State 1,2,3,4 -vs- State 1,2,3,5	SK1G00046279	2	6.08933e-37	4.07355e-35	--	XP_015632781.1 XIAP-associated factor 1 [Oryza sativa Japonica Group]	-	-	-	-	-	GO:0008270//zinc ion binding;GO:0046983//protein dimerization activity	-
State 1,2,3,4 -vs- State 1,2,3,5	SK1G00046286	1	5.96675e-57	7.1364e-55	VLN2	EAZ26972.1 hypothetical protein OsJ_10899 [Oryza sativa Japonica Group]	-	-	-	-	-	GO:0003779//actin binding	GO:0007010//cytoskeleton organization
State 1,2,3,4 -vs- State 1,2,3,5	SK1G00046291	2	2.68846e-15	7.93844e-14	GPX4	XP_015632791.1 probable glutathione peroxidase 4 [Oryza sativa Japonica Group]	Metabolism;Metabolism;Metabolism	Global and overview maps;Metabolism of other amino acids;Lipid metabolism	ko01100//Metabolic pathways;ko00480//Glutathione metabolism;ko00590//Arachidonic acid metabolism	K00432;K00432;K00432	-	GO:0004602//glutathione peroxidase activity;GO:0016209//antioxidant activity;GO:0016491//oxidoreductase activity	GO:0006979//response to oxidative stress;GO:0055114//oxidation-reduction process
State 1,2,3,4 -vs- State 1,2,3,5	SK1G00046310	1	3.54345e-33	2.09435e-31	EXPA6	EAY89916.1 hypothetical protein OsI_11465 [Oryza sativa Indica Group]	-	-	-	-	-	-	-
State 1,2,3,4 -vs- State 1,2,3,5	SK1G00046321	5	1.02943e-94	2.63075e-92	RPL19A	KAF0913625.1 hypothetical protein E2562_023735 [Oryza meyeriana var. granulata] [Oryza meyeriana]	Genetic Information Processing	Translation	ko03010//Ribosome	K02885	GO:0005840//ribosome	GO:0003735//structural constituent of ribosome	GO:0006412//translation
State 1,2,3,4 -vs- State 1,2,3,5	SK1G00046329	3	9.63268e-18	3.2372e-16	PER70	XP_015629202.1 peroxidase 70 [Oryza sativa Japonica Group]	Metabolism;Metabolism;Metabolism	Global and overview maps;Global and overview maps;Biosynthesis of other secondary metabolites	ko01100//Metabolic pathways;ko01110//Biosynthesis of secondary metabolites;ko00940//Phenylpropanoid biosynthesis	K00430;K00430;K00430	-	GO:0004601//peroxidase activity;GO:0020037//heme binding	GO:0006979//response to oxidative stress;GO:0055114//oxidation-reduction process
State 1,2,3,4 -vs- State 1,2,3,5	SK1G00046340	5	6.67337e-32	3.81112e-30	RPL18C	XP_015631625.1 60S ribosomal protein L18-3 [Oryza sativa Japonica Group]	Genetic Information Processing	Translation	ko03010//Ribosome	K02883	-	-	-
State 1,2,3,4 -vs- State 1,2,3,5	SK1G00046348	5	1.55058e-29	8.12383e-28	At1g56220	XP_015632059.1 dormancy-associated protein homolog 3 [Oryza sativa Japonica Group]	-	-	-	-	-	-	-
State 1,2,3,4 -vs- State 1,2,3,5	SK1G00046351	5	1.53672e-18	5.32041e-17	RPL22B	XP_015630925.1 60S ribosomal protein L22-2 [Oryza sativa Japonica Group]	Genetic Information Processing	Translation	ko03010//Ribosome	K02891	GO:0005840//ribosome	GO:0003735//structural constituent of ribosome	GO:0006412//translation
State 1,2,3,4 -vs- State 1,2,3,5	SK1G00046355	3	5.71587e-58	6.9061e-56	--	XP_015628910.1 uncharacterized protein LOC4332805 [Oryza sativa Japonica Group]	-	-	-	-	GO:0009523//photosystem II;GO:0009654//photosystem II oxygen evolving complex;GO:0016020//membrane;GO:0019898//extrinsic component of membrane	GO:0005509//calcium ion binding	GO:0015979//photosynthesis
State 1,2,3,4 -vs- State 1,2,3,5	SK1G00046391	5	1.5704e-08	2.86511e-07	NOP5-2	XP_015630758.1 probable nucleolar protein 5-2 [Oryza sativa Japonica Group]	Genetic Information Processing	Translation	ko03008//Ribosome biogenesis in eukaryotes	K14565	-	-	-
State 1,2,3,4 -vs- State 1,2,3,5	SK1G00046404	5	8.6661e-10	1.7702e-08	nop56	KAB8091804.1 hypothetical protein EE612_017426 [Oryza sativa]	Genetic Information Processing	Translation	ko03008//Ribosome biogenesis in eukaryotes	K14564	-	-	-
State 1,2,3,4 -vs- State 1,2,3,5	SK1G00046409	5	2.52948e-11	5.85357e-10	MTACP2	XP_015632715.1 acyl carrier protein 2, mitochondrial isoform X1 [Oryza sativa Japonica Group]	Metabolism;Metabolism	Global and overview maps;Energy metabolism	ko01100//Metabolic pathways;ko00190//Oxidative phosphorylation	K03955;K03955	GO:0005575//cellular_component	GO:0000036//ACP phosphopantetheine attachment site binding involved in fatty acid biosynthetic process;GO:0003674//molecular_function;GO:0047473//D-alanine-poly(phosphoribitol) ligase activity	GO:0006633//fatty acid biosynthetic process;GO:0019350//teichoic acid biosynthetic process;GO:0030152//bacteriocin biosynthetic process
State 1,2,3,4 -vs- State 1,2,3,5	SK1G00046413	5	1.46176e-35	9.45803e-34	ERD15	EAY90021.1 hypothetical protein OsI_11591 [Oryza sativa Indica Group]	-	-	-	-	-	-	-
State 1,2,3,4 -vs- State 1,2,3,5	SK1G00046422	2	1.27403e-09	2.56699e-08	--	XP_015629217.1 DEAD-box ATP-dependent RNA helicase 12-like [Oryza sativa Japonica Group]	-	-	-	-	-	-	-
State 1,2,3,4 -vs- State 1,2,3,5	SK1G00046427	5	6.22637e-12	1.49643e-10	CAM1-1	VAH26210.1 unnamed protein product [Triticum turgidum subsp. durum] [Triticum turgidum]	Organismal Systems;Environmental Information Processing;Environmental Information Processing	Environmental adaptation;Signal transduction;Signal transduction	ko04626//Plant-pathogen interaction;ko04016//MAPK signaling pathway - plant;ko04070//Phosphatidylinositol signaling system	K02183;K02183;K02183	GO:0016020//membrane;GO:0030880//RNA polymerase complex	GO:0004553//hydrolase activity, hydrolyzing O-glycosyl compounds;GO:0005509//calcium ion binding;GO:0005515//protein binding;GO:0015159//polysaccharide transmembrane transporter activity	GO:0000272//polysaccharide catabolic process;GO:0006352//DNA-templated transcription, initiation;GO:0015774//polysaccharide transport;GO:0046677//response to antibiotic
State 1,2,3,4 -vs- State 1,2,3,5	SK1G00046443	1	3.89933e-22	1.56865e-20	WRKY46	XP_015631650.1 probable WRKY transcription factor 35 [Oryza sativa Japonica Group]	-	-	-	-	-	GO:0003700//transcription factor activity, sequence-specific DNA binding;GO:0043565//sequence-specific DNA binding	GO:0006355//regulation of transcription, DNA-templated
State 1,2,3,4 -vs- State 1,2,3,5	SK1G00046447	2	2.19628e-30	1.17494e-28	--	EAY89810.1 hypothetical protein OsI_11356 [Oryza sativa Indica Group]	-	-	-	-	-	-	-
State 1,2,3,4 -vs- State 1,2,3,5	SK1G00046461	2	1.49326e-21	5.87417e-20	--	EEC75157.1 hypothetical protein OsI_11367 [Oryza sativa Indica Group]	-	-	-	-	-	-	-
State 1,2,3,4 -vs- State 1,2,3,5	SK1G00046480	5	6.4816e-28	3.23825e-26	NAC046	EAY89847.1 hypothetical protein OsI_11397 [Oryza sativa Indica Group]	-	-	-	-	-	GO:0003677//DNA binding	GO:0006355//regulation of transcription, DNA-templated
State 1,2,3,4 -vs- State 1,2,3,5	SK1G00046482	5	2.43971e-16	7.60207e-15	R40C1	XP_015631880.1 ricin B-like lectin R40C1 [Oryza sativa Japonica Group]	-	-	-	-	-	-	-
State 1,2,3,4 -vs- State 1,2,3,5	SK1G00046503	3	2.44854e-24	1.07512e-22	slr1780	XP_015628146.1 uncharacterized protein LOC4332730 [Oryza sativa Japonica Group]	-	-	-	-	-	-	-
State 1,2,3,4 -vs- State 1,2,3,5	SK1G00046520	5	2.52246e-12	6.22242e-11	EDR4	EEC75199.1 hypothetical protein OsI_11447 [Oryza sativa Indica Group]	-	-	-	-	-	-	-
State 1,2,3,4 -vs- State 1,2,3,5	SK1G00046543	2	1.17335e-54	1.30249e-52	PR1	EEC75066.1 hypothetical protein OsI_11186 [Oryza sativa Indica Group]	Genetic Information Processing	Translation	ko03008//Ribosome biogenesis in eukaryotes	K14546	GO:0009279//cell outer membrane	GO:0005515//protein binding	GO:0006952//defense response
State 1,2,3,4 -vs- State 1,2,3,5	SK1G00046545	4	5.62476e-33	3.30252e-31	dnajb6-a	XP_015628525.1 uncharacterized protein LOC4332570 [Oryza sativa Japonica Group]	-	-	-	-	-	GO:0003674//molecular_function;GO:0005515//protein binding	GO:0006457//protein folding;GO:0009408//response to heat;GO:0043571//maintenance of CRISPR repeat elements
State 1,2,3,4 -vs- State 1,2,3,5	SK1G00046587	3	4.50716e-72	7.21186e-70	CP12-1	EAY89700.1 hypothetical protein OsI_11237 [Oryza sativa Indica Group]	-	-	-	-	-	-	-
State 1,2,3,4 -vs- State 1,2,3,5	SK1G00046589	5	6.00762e-30	3.17092e-28	--	XP_015631797.1 uncharacterized protein LOC4332605 [Oryza sativa Japonica Group]	-	-	-	-	GO:0005576//extracellular region	-	GO:0042742//defense response to bacterium
State 1,2,3,4 -vs- State 1,2,3,5	SK1G00046616	2	6.14265e-23	2.56403e-21	ECHIA	ABF95571.1 enoyl-CoA hydratase/isomerase family protein, expressed [Oryza sativa Japonica Group]	Metabolism;Metabolism;Metabolism;Metabolism;Metabolism;Metabolism;Metabolism;Metabolism;Metabolism;Metabolism;Metabolism;Metabolism	Global and overview maps;Global and overview maps;Global and overview maps;Amino acid metabolism;Lipid metabolism;Amino acid metabolism;Metabolism of other amino acids;Amino acid metabolism;Amino acid metabolism;Carbohydrate metabolism;Carbohydrate metabolism;Metabolism of terpenoids and polyketides	ko01100//Metabolic pathways;ko01110//Biosynthesis of secondary metabolites;ko01212//Fatty acid metabolism;ko00380//Tryptophan metabolism;ko00071//Fatty acid degradation;ko00280//Valine, leucine and isoleucine degradation;ko00410//beta-Alanine metabolism;ko00310//Lysine degradation;ko00360//Phenylalanine metabolism;ko00640//Propanoate metabolism;ko00650//Butanoate metabolism;ko00903//Limonene and …	K01692;K01692;K01692;K01692;K01692;K01692;K01692;K01692;K01692;K01692;K01692;K01692	GO:0016507//mitochondrial fatty acid beta-oxidation multienzyme complex	GO:0003824//catalytic activity;GO:0003857//3-hydroxyacyl-CoA dehydrogenase activity;GO:0003860//3-hydroxyisobutyryl-CoA hydrolase activity;GO:0004165//dodecenoyl-CoA delta-isomerase activity;GO:0004300//enoyl-CoA hydratase activity;GO:0008692//3-hydroxybutyryl-CoA epimerase activity;GO:0008935//1,4-dihydroxy-2-naphthoyl-CoA synthase activity;GO:0016787//hydrolase activity;GO:0016830//carbon-carbo…	GO:0006635//fatty acid beta-oxidation;GO:0009062//fatty acid catabolic process;GO:0009234//menaquinone biosynthetic process;GO:0010124//phenylacetate catabolic process;GO:0010128//benzoate catabolic process via CoA ligation;GO:0019439//aromatic compound catabolic process
State 1,2,3,4 -vs- State 1,2,3,5	SK1G00046621	5	8.09435e-44	6.59467e-42	CP1	EAY89735.1 hypothetical protein OsI_11276 [Oryza sativa Indica Group]	Organismal Systems;Environmental Information Processing;Environmental Information Processing	Environmental adaptation;Signal transduction;Signal transduction	ko04626//Plant-pathogen interaction;ko04016//MAPK signaling pathway - plant;ko04070//Phosphatidylinositol signaling system	K02183;K02183;K02183	-	GO:0005509//calcium ion binding;GO:0005515//protein binding	-
State 1,2,3,4 -vs- State 1,2,3,5	SK1G00046627	4	4.02104e-29	2.0761e-27	CRRSP55	KAB8091519.1 hypothetical protein EE612_017025 [Oryza sativa]	-	-	-	-	-	-	-
State 1,2,3,4 -vs- State 1,2,3,5	SK1G00046645	5	2.39894e-80	4.58147e-78	MYB2	EAY89765.1 hypothetical protein OsI_11306 [Oryza sativa Indica Group]	-	-	-	-	-	-	-
State 1,2,3,4 -vs- State 1,2,3,5	SK1G00046646	3	2.1497e-11	4.99097e-10	RPS1	XP_015628466.1 30S ribosomal protein S1, chloroplastic [Oryza sativa Japonica Group]	Genetic Information Processing	Translation	ko03010//Ribosome	K02945	GO:0000314//organellar small ribosomal subunit;GO:0022627//cytosolic small ribosomal subunit	GO:0003676//nucleic acid binding;GO:0003735//structural constituent of ribosome;GO:0003899//DNA-directed RNA polymerase activity;GO:0004540//ribonuclease activity;GO:0004654//polyribonucleotide nucleotidyltransferase activity	GO:0006401//RNA catabolic process;GO:0006402//mRNA catabolic process;GO:0006412//translation
State 1,2,3,4 -vs- State 1,2,3,5	SK1G00046659	3	1.58326e-23	6.77599e-22	ATPG	XP_015630476.1 ATP synthase subunit b', chloroplastic [Oryza sativa Japonica Group]	Metabolism;Metabolism;Metabolism	Global and overview maps;Energy metabolism;Energy metabolism	ko01100//Metabolic pathways;ko00190//Oxidative phosphorylation;ko00195//Photosynthesis	K02109;K02109;K02109	GO:0000276//mitochondrial proton-transporting ATP synthase complex, coupling factor F(o);GO:0005576//extracellular region;GO:0005577//fibrinogen complex;GO:0019028//viral capsid;GO:0019031//viral envelope;GO:0030257//type III protein secretion system complex;GO:0045263//proton-transporting ATP synthase complex, coupling factor F(o);GO:0045264//plasma membrane proton-transporting ATP synthase comp…	GO:0003690//double-stranded DNA binding;GO:0005102//receptor binding;GO:0005198//structural molecule activity;GO:0008289//lipid binding;GO:0015078//hydrogen ion transmembrane transporter activity;GO:0032183//SUMO binding;GO:0046933//proton-transporting ATP synthase activity, rotational mechanism;GO:0051082//unfolded protein binding;GO:0070140//SUMO-specific isopeptidase activity	GO:0006265//DNA topological change;GO:0006869//lipid transport;GO:0009405//pathogenesis;GO:0015986//ATP synthesis coupled proton transport;GO:0030168//platelet activation;GO:0030254//protein secretion by the type III secretion system;GO:0042157//lipoprotein metabolic process;GO:0051258//protein polymerization
State 1,2,3,4 -vs- State 1,2,3,5	SK1G00046670	2	3.33433e-10	7.03755e-09	ABCB20	BAF11650.2 Os03g0280000, partial [Oryza sativa Japonica Group]	Environmental Information Processing	Membrane transport	ko02010//ABC transporters	K05658	GO:0005575//cellular_component;GO:0005737//cytoplasm;GO:0005887//integral component of plasma membrane;GO:0009380//excinuclease repair complex;GO:0009898//cytoplasmic side of plasma membrane;GO:0016021//integral component of membrane;GO:0043190//ATP-binding cassette (ABC) transporter complex;GO:0055051//ATP-binding cassette (ABC) transporter complex, integrated substrate binding;GO:0055052//ATP-b…	GO:0003924//GTPase activity;GO:0004020//adenylylsulfate kinase activity;GO:0004140//dephospho-CoA kinase activity;GO:0005260//channel-conductance-controlling ATPase activity;GO:0005319//lipid transporter activity;GO:0005524//ATP binding;GO:0005525//GTP binding;GO:0008565//protein transporter activity;GO:0009381//excinuclease ABC activity;GO:0015220//choline transmembrane transporter activity;GO:0…	GO:0000910//cytokinesis;GO:0006289//nucleotide-excision repair;GO:0006790//sulfur compound metabolic process;GO:0006810//transport;GO:0006817//phosphate ion transport;GO:0006824//cobalt ion transport;GO:0006855//drug transmembrane transport;GO:0006869//lipid transport;GO:0007186//G-protein coupled receptor signaling pathway;GO:0007601//visual perception;GO:0008150//biological_process;GO:0008272//…
State 1,2,3,4 -vs- State 1,2,3,5	SK1G00046680	2	3.79065e-08	6.65274e-07	HERK1	AAN64488.1 putative receptor-like protein kinase [Oryza sativa Japonica Group]	-	-	-	-	GO:0016021//integral component of membrane	GO:0001733//galactosylceramide sulfotransferase activity;GO:0004672//protein kinase activity;GO:0005524//ATP binding	GO:0006468//protein phosphorylation;GO:0009247//glycolipid biosynthetic process
State 1,2,3,4 -vs- State 1,2,3,5	SK1G00046706	4	4.40481e-12	1.06877e-10	MPK5	AAK01710.1 MAP kinase BIMK1 [Oryza sativa Indica Group]	Organismal Systems;Environmental Information Processing	Environmental adaptation;Signal transduction	ko04626//Plant-pathogen interaction;ko04016//MAPK signaling pathway - plant	K20536;K20536	-	GO:0004672//protein kinase activity;GO:0005524//ATP binding	GO:0006468//protein phosphorylation
State 1,2,3,4 -vs- State 1,2,3,5	SK1G00046710	4	8.58911e-11	1.89977e-09	At3g11320	XP_015630990.1 probable sugar phosphate/phosphate translocator At3g11320 [Oryza sativa Japonica Group]	-	-	-	-	GO:0016020//membrane;GO:0016021//integral component of membrane	-	GO:0055085//transmembrane transport
State 1,2,3,4 -vs- State 1,2,3,5	SK1G00046716	4	5.71174e-13	1.46811e-11	LBD1	XP_015629326.1 LOB domain-containing protein 1 [Oryza sativa Japonica Group]	-	-	-	-	-	-	-
State 1,2,3,4 -vs- State 1,2,3,5	SK1G00046751	5	5.67605e-23	2.37205e-21	PDC2	A2XFI3.2 RecName: Full=Pyruvate decarboxylase 2; Short=PDC [Oryza sativa Indica Group]	Metabolism;Metabolism;Metabolism	Global and overview maps;Global and overview maps;Carbohydrate metabolism	ko01100//Metabolic pathways;ko01110//Biosynthesis of secondary metabolites;ko00010//Glycolysis / Gluconeogenesis	K01568;K01568;K01568	GO:0005948//acetolactate synthase complex	GO:0000287//magnesium ion binding;GO:0003824//catalytic activity;GO:0003984//acetolactate synthase activity;GO:0008949//oxalyl-CoA decarboxylase activity;GO:0009028//tartronate-semialdehyde synthase activity;GO:0016823//hydrolase activity, acting on acid carbon-carbon bonds, in ketonic substances;GO:0030976//thiamine pyrophosphate binding;GO:0033980//phosphonopyruvate decarboxylase activity;GO:00…	GO:0006113//fermentation;GO:0009097//isoleucine biosynthetic process;GO:0009099//valine biosynthetic process;GO:0009234//menaquinone biosynthetic process;GO:0009444//pyruvate oxidation;GO:0009636//response to toxic substance;GO:0009684//indoleacetic acid biosynthetic process;GO:0017000//antibiotic biosynthetic process;GO:0019310//inositol catabolic process;GO:0019529//taurine catabolic process;GO…
State 1,2,3,4 -vs- State 1,2,3,5	SK1G00046767	2	6.9096e-10	1.41957e-08	IFI30	KAB8091375.1 hypothetical protein EE612_016837 [Oryza sativa]	-	-	-	-	-	-	-
State 1,2,3,4 -vs- State 1,2,3,5	SK1G00046772	3	5.81924e-13	1.49466e-11	At2g40290	EAY89622.1 hypothetical protein OsI_11150 [Oryza sativa Indica Group]	Genetic Information Processing;Genetic Information Processing	Folding, sorting and degradation;Translation	ko04141//Protein processing in endoplasmic reticulum;ko03013//RNA transport	K03237;K03237	GO:0000314//organellar small ribosomal subunit;GO:0022627//cytosolic small ribosomal subunit	GO:0003676//nucleic acid binding;GO:0003723//RNA binding;GO:0003735//structural constituent of ribosome;GO:0003743//translation initiation factor activity;GO:0004654//polyribonucleotide nucleotidyltransferase activity	GO:0006402//mRNA catabolic process;GO:0006412//translation
State 1,2,3,4 -vs- State 1,2,3,5	SK1G00046776	2	9.07421e-21	3.47343e-19	At5g01610	EEC75049.1 hypothetical protein OsI_11156 [Oryza sativa Indica Group]	-	-	-	-	-	GO:0008289//lipid binding	-
State 1,2,3,4 -vs- State 1,2,3,5	SK1G00046777	5	8.046e-87	1.82045e-84	RPS7	XP_015631394.1 40S ribosomal protein S7-like [Oryza sativa Japonica Group]	Genetic Information Processing	Translation	ko03010//Ribosome	K02993	GO:0005840//ribosome	GO:0003735//structural constituent of ribosome	GO:0006412//translation
State 1,2,3,4 -vs- State 1,2,3,5	SK1G00046778	5	3.22082e-33	1.91963e-31	RPS7	XP_015631395.1 40S ribosomal protein S7-like [Oryza sativa Japonica Group]	Genetic Information Processing	Translation	ko03010//Ribosome	K02993	GO:0005840//ribosome	GO:0003735//structural constituent of ribosome	GO:0006412//translation
State 1,2,3,4 -vs- State 1,2,3,5	SK1G00046794	4	2.77164e-09	5.44247e-08	MEKK1	XP_015633020.1 mitogen-activated protein kinase kinase kinase 1 [Oryza sativa Japonica Group]	Organismal Systems;Environmental Information Processing	Environmental adaptation;Signal transduction	ko04626//Plant-pathogen interaction;ko04016//MAPK signaling pathway - plant	K13414;K13414	-	GO:0004672//protein kinase activity;GO:0005524//ATP binding	GO:0006468//protein phosphorylation
State 1,2,3,4 -vs- State 1,2,3,5	SK1G00046817	2	2.73796e-53	2.92946e-51	PXN	XP_015628226.1 peroxisomal nicotinamide adenine dinucleotide carrier [Oryza sativa Japonica Group]	Cellular Processes	Transport and catabolism	ko04146//Peroxisome	K13354	-	-	-
State 1,2,3,4 -vs- State 1,2,3,5	SK1G00046818	3	2.56976e-20	9.59042e-19	RPL4	EEC74918.1 hypothetical protein OsI_10864 [Oryza sativa Indica Group]	Genetic Information Processing	Translation	ko03010//Ribosome	K02926	GO:0005840//ribosome;GO:0022625//cytosolic large ribosomal subunit	GO:0003735//structural constituent of ribosome	GO:0006412//translation
State 1,2,3,4 -vs- State 1,2,3,5	SK1G00046824	4	1.94537e-23	8.27584e-22	--	ABF95142.1 expressed protein [Oryza sativa Japonica Group]	-	-	-	-	-	-	-
State 1,2,3,4 -vs- State 1,2,3,5	SK1G00046826	1	1.68121e-17	5.5761e-16	WLIN2A	XP_015630472.1 LIM domain-containing protein WLIM2a [Oryza sativa Japonica Group]	-	-	-	-	-	-	-
State 1,2,3,4 -vs- State 1,2,3,5	SK1G00046828	5	5.45709e-11	1.22843e-09	HSP17.9A	ABY52935.1 heat shock protein Hsp20 [Oryza sativa Japonica Group]	Genetic Information Processing	Folding, sorting and degradation	ko04141//Protein processing in endoplasmic reticulum	K13993	-	-	-
State 1,2,3,4 -vs- State 1,2,3,5	SK1G00046834	5	2.97321e-26	1.39702e-24	HSP17.4	XP_015631117.1 17.4 kDa class I heat shock protein [Oryza sativa Japonica Group]	Genetic Information Processing	Folding, sorting and degradation	ko04141//Protein processing in endoplasmic reticulum	K13993	-	-	-
State 1,2,3,4 -vs- State 1,2,3,5	SK1G00046835	3	1.5289e-13	4.09266e-12	OsI_10887	XP_015632363.1 fructose-1,6-bisphosphatase, chloroplastic [Oryza sativa Japonica Group]	Metabolism;Metabolism;Metabolism;Metabolism;Metabolism;Metabolism;Metabolism	Global and overview maps;Global and overview maps;Global and overview maps;Carbohydrate metabolism;Energy metabolism;Carbohydrate metabolism;Carbohydrate metabolism	ko01100//Metabolic pathways;ko01110//Biosynthesis of secondary metabolites;ko01200//Carbon metabolism;ko00010//Glycolysis / Gluconeogenesis;ko00710//Carbon fixation in photosynthetic organisms;ko00051//Fructose and mannose metabolism;ko00030//Pentose phosphate pathway	K03841;K03841;K03841;K03841;K03841;K03841;K03841	-	GO:0004810//tRNA adenylyltransferase activity;GO:0016437//tRNA cytidylyltransferase activity	-
State 1,2,3,4 -vs- State 1,2,3,5	SK1G00046837	4	2.48582e-40	1.82065e-38	--	XP_015631386.1 uncharacterized protein LOC4332365 [Oryza sativa Japonica Group]	-	-	-	-	-	-	-
State 1,2,3,4 -vs- State 1,2,3,5	SK1G00046876	3	7.68185e-12	1.82769e-10	LAC10	XP_015628787.1 laccase-10 [Oryza sativa Japonica Group]	-	-	-	-	-	GO:0005375//copper ion transmembrane transporter activity;GO:0005507//copper ion binding;GO:0016491//oxidoreductase activity	GO:0006825//copper ion transport;GO:0055114//oxidation-reduction process
State 1,2,3,4 -vs- State 1,2,3,5	SK1G00046878	2	2.10262e-71	3.29028e-69	--	XP_015633236.1 suppressor of disruption of TFIIS [Oryza sativa Japonica Group]	-	-	-	-	-	GO:0008801//beta-phosphoglucomutase activity;GO:0008967//phosphoglycolate phosphatase activity;GO:0016787//hydrolase activity;GO:0016791//phosphatase activity;GO:0016862//intramolecular oxidoreductase activity, interconverting keto- and enol-groups;GO:0018784//(S)-2-haloacid dehalogenase activity	GO:0006805//xenobiotic metabolic process;GO:0008152//metabolic process;GO:0009853//photorespiration;GO:0015671//oxygen transport;GO:0019509//L-methionine biosynthetic process from methylthioadenosine;GO:0043094//cellular metabolic compound salvage;GO:0046352//disaccharide catabolic process
State 1,2,3,4 -vs- State 1,2,3,5	SK1G00046886	2	1.0445e-10	2.28889e-09	RLCK176	XP_015631826.1 receptor-like cytoplasmic kinase 176 isoform X1 [Oryza sativa Japonica Group]	-	-	-	-	-	GO:0004672//protein kinase activity;GO:0005524//ATP binding	GO:0006468//protein phosphorylation
State 1,2,3,4 -vs- State 1,2,3,5	SK1G00046894	4	1.76578e-35	1.14044e-33	HSP70	XP_015630538.1 heat shock cognate 70 kDa protein 2 [Oryza sativa Japonica Group]	Genetic Information Processing;Genetic Information Processing;Cellular Processes	Folding, sorting and degradation;Transcription;Transport and catabolism	ko04141//Protein processing in endoplasmic reticulum;ko03040//Spliceosome;ko04144//Endocytosis	K03283;K03283;K03283	-	GO:0004856//xylulokinase activity;GO:0005515//protein binding;GO:0005524//ATP binding;GO:0016773//phosphotransferase activity, alcohol group as acceptor;GO:0016787//hydrolase activity;GO:0016887//ATPase activity;GO:0051082//unfolded protein binding	GO:0005975//carbohydrate metabolic process;GO:0005997//xylulose metabolic process;GO:0006457//protein folding;GO:0006950//response to stress;GO:0008360//regulation of cell shape;GO:0042732//D-xylose metabolic process;GO:0043093//FtsZ-dependent cytokinesis
State 1,2,3,4 -vs- State 1,2,3,5	SK1G00046901	4	3.60432e-24	1.57095e-22	CRRSP55	XP_015628566.1 cysteine-rich repeat secretory protein 55 [Oryza sativa Japonica Group]	-	-	-	-	-	-	-
State 1,2,3,4 -vs- State 1,2,3,5	SK1G00046902	4	7.07605e-29	3.61143e-27	CRRSP55	EAY89462.1 hypothetical protein OsI_10995 [Oryza sativa Indica Group]	-	-	-	-	-	-	-
State 1,2,3,4 -vs- State 1,2,3,5	SK1G00046904	5	2.89701e-74	4.80877e-72	UXS3	XP_015632111.1 UDP-glucuronic acid decarboxylase 6 [Oryza sativa Japonica Group]	Metabolism;Metabolism	Global and overview maps;Carbohydrate metabolism	ko01100//Metabolic pathways;ko00520//Amino sugar and nucleotide sugar metabolism	K08678;K08678	-	GO:0003824//catalytic activity;GO:0003854//3-beta-hydroxy-delta5-steroid dehydrogenase activity;GO:0003978//UDP-glucose 4-epimerase activity;GO:0004043//L-aminoadipate-semialdehyde dehydrogenase activity;GO:0008446//GDP-mannose 4,6-dehydratase activity;GO:0008460//dTDP-glucose 4,6-dehydratase activity;GO:0008712//ADP-glyceromanno-heptose 6-epimerase activity;GO:0008831//dTDP-4-dehydrorhamnose red…	GO:0000271//polysaccharide biosynthetic process;GO:0005975//carbohydrate metabolic process;GO:0006012//galactose metabolic process;GO:0006694//steroid biosynthetic process;GO:0009243//O antigen biosynthetic process;GO:0009244//lipopolysaccharide core region biosynthetic process;GO:0019305//dTDP-rhamnose biosynthetic process;GO:0019878//lysine biosynthetic process via aminoadipic acid;GO:0055114//…
State 1,2,3,4 -vs- State 1,2,3,5	SK1G00046906	3	3.81227e-22	1.53537e-20	ALY1	EAY89467.1 hypothetical protein OsI_10999 [Oryza sativa Indica Group]	Genetic Information Processing;Genetic Information Processing;Genetic Information Processing	Transcription;Translation;Translation	ko03040//Spliceosome;ko03013//RNA transport;ko03015//mRNA surveillance pathway	K12881;K12881;K12881	-	GO:0003676//nucleic acid binding;GO:0003723//RNA binding	GO:0008380//RNA splicing
State 1,2,3,4 -vs- State 1,2,3,5	SK1G00046911	5	6.66472e-12	1.59209e-10	FPP4	EEC74858.1 hypothetical protein OsI_10736 [Oryza sativa Indica Group]	-	-	-	-	-	GO:0005524//ATP binding	GO:0007059//chromosome segregation;GO:0030261//chromosome condensation
State 1,2,3,4 -vs- State 1,2,3,5	SK1G00046931	5	1.07509e-11	2.54425e-10	ACR8	XP_015627838.1 ACT domain-containing protein ACR8 [Oryza sativa Japonica Group]	-	-	-	-	-	GO:0008773//[protein-PII] uridylyltransferase activity	GO:0006629//lipid metabolic process;GO:0018177//protein uridylylation
State 1,2,3,4 -vs- State 1,2,3,5	SK1G00046940	5	7.72463e-09	1.44952e-07	GAE2	XP_015628152.1 UDP-glucuronate 4-epimerase 3 [Oryza sativa Japonica Group]	Metabolism;Metabolism	Global and overview maps;Carbohydrate metabolism	ko01100//Metabolic pathways;ko00520//Amino sugar and nucleotide sugar metabolism	K08679;K08679	GO:0000314//organellar small ribosomal subunit;GO:0022627//cytosolic small ribosomal subunit	GO:0003735//structural constituent of ribosome;GO:0003824//catalytic activity;GO:0003854//3-beta-hydroxy-delta5-steroid dehydrogenase activity;GO:0003978//UDP-glucose 4-epimerase activity;GO:0008446//GDP-mannose 4,6-dehydratase activity;GO:0008460//dTDP-glucose 4,6-dehydratase activity;GO:0008712//ADP-glyceromanno-heptose 6-epimerase activity;GO:0008831//dTDP-4-dehydrorhamnose reductase activity;…	GO:0000271//polysaccharide biosynthetic process;GO:0005975//carbohydrate metabolic process;GO:0006012//galactose metabolic process;GO:0006412//translation;GO:0006694//steroid biosynthetic process;GO:0009243//O antigen biosynthetic process;GO:0009244//lipopolysaccharide core region biosynthetic process;GO:0019305//dTDP-rhamnose biosynthetic process;GO:0055114//oxidation-reduction process
State 1,2,3,4 -vs- State 1,2,3,5	SK1G00046945	1	1.75399e-19	6.37721e-18	--	EAY89269.1 hypothetical protein OsI_10767 [Oryza sativa Indica Group]	-	-	-	-	-	GO:0005509//calcium ion binding	-
State 1,2,3,4 -vs- State 1,2,3,5	SK1G00046968	2	1.53935e-30	8.29753e-29	--	XP_015628295.1 uncharacterized protein LOC4332279 [Oryza sativa Japonica Group]	-	-	-	-	-	-	-
State 1,2,3,4 -vs- State 1,2,3,5	SK1G00046979	1	7.0069e-10	1.43872e-08	Os03g0255100	KAB8091133.1 hypothetical protein EE612_016565 [Oryza sativa]	-	-	-	-	GO:0009341//beta-galactosidase complex	GO:0004553//hydrolase activity, hydrolyzing O-glycosyl compounds;GO:0004565//beta-galactosidase activity;GO:0030246//carbohydrate binding	GO:0005975//carbohydrate metabolic process
State 1,2,3,4 -vs- State 1,2,3,5	SK1G00046982	1	7.38738e-43	5.8185e-41	PCKA	EAY89301.1 hypothetical protein OsI_10803 [Oryza sativa Indica Group]	Metabolism;Metabolism;Metabolism;Metabolism;Metabolism;Metabolism;Metabolism	Global and overview maps;Global and overview maps;Global and overview maps;Carbohydrate metabolism;Carbohydrate metabolism;Energy metabolism;Carbohydrate metabolism	ko01100//Metabolic pathways;ko01110//Biosynthesis of secondary metabolites;ko01200//Carbon metabolism;ko00010//Glycolysis / Gluconeogenesis;ko00620//Pyruvate metabolism;ko00710//Carbon fixation in photosynthetic organisms;ko00020//Citrate cycle (TCA cycle)	K01610;K01610;K01610;K01610;K01610;K01610;K01610	-	GO:0004612//phosphoenolpyruvate carboxykinase (ATP) activity;GO:0005524//ATP binding	GO:0006094//gluconeogenesis
State 1,2,3,4 -vs- State 1,2,3,5	SK1G00047005	1	2.97471e-120	1.01603e-117	MYOB2	XP_015632393.1 myosin-binding protein 2 isoform X3 [Oryza sativa Japonica Group]	-	-	-	-	-	-	-
State 1,2,3,4 -vs- State 1,2,3,5	SK1G00047030	2	5.52731e-35	3.51866e-33	BCAT5	XP_015630708.1 branched-chain-amino-acid aminotransferase 2, chloroplastic [Oryza sativa Japonica Group]	Metabolism;Metabolism;Metabolism;Metabolism;Metabolism;Metabolism;Metabolism;Metabolism;Metabolism	Global and overview maps;Global and overview maps;Global and overview maps;Amino acid metabolism;Global and overview maps;Amino acid metabolism;Metabolism of cofactors and vitamins;Amino acid metabolism;Biosynthesis of other secondary metabolites	ko01100//Metabolic pathways;ko01110//Biosynthesis of secondary metabolites;ko01230//Biosynthesis of amino acids;ko00270//Cysteine and methionine metabolism;ko01210//2-Oxocarboxylic acid metabolism;ko00280//Valine, leucine and isoleucine degradation;ko00770//Pantothenate and CoA biosynthesis;ko00290//Valine, leucine and isoleucine biosynthesis;ko00966//Glucosinolate biosynthesis	K00826;K00826;K00826;K00826;K00826;K00826;K00826;K00826;K00826	-	GO:0003824//catalytic activity;GO:0004084//branched-chain-amino-acid transaminase activity;GO:0008696//4-amino-4-deoxychorismate lyase activity;GO:0047810//D-alanine:2-oxoglutarate aminotransferase activity	GO:0008153//para-aminobenzoic acid biosynthetic process;GO:0009082//branched-chain amino acid biosynthetic process;GO:0009396//folic acid-containing compound biosynthetic process;GO:0019480//L-alanine oxidation to pyruvate via D-alanine
State 1,2,3,4 -vs- State 1,2,3,5	SK1G00047042	1	2.57612e-13	6.79354e-12	At2g23790	XP_015629297.1 calcium uniporter protein 4, mitochondrial [Oryza sativa Japonica Group]	-	-	-	-	-	-	-
State 1,2,3,4 -vs- State 1,2,3,5	SK1G00047050	5	3.8097e-89	8.90317e-87	Ub-CEP52-1	XP_006649691.1 PREDICTED: ubiquitin-60S ribosomal protein L40-2 [Oryza brachyantha]	Genetic Information Processing	Translation	ko03010//Ribosome	K02927	GO:0005840//ribosome	GO:0003735//structural constituent of ribosome;GO:0005515//protein binding	GO:0006289//nucleotide-excision repair;GO:0006412//translation
State 1,2,3,4 -vs- State 1,2,3,5	SK1G00047057	2	1.11252e-20	4.24021e-19	GAD1	EAY89173.1 hypothetical protein OsI_10669 [Oryza sativa Indica Group]	Metabolism;Metabolism;Metabolism;Metabolism;Metabolism;Metabolism	Global and overview maps;Global and overview maps;Amino acid metabolism;Metabolism of other amino acids;Carbohydrate metabolism;Metabolism of other amino acids	ko01100//Metabolic pathways;ko01110//Biosynthesis of secondary metabolites;ko00250//Alanine, aspartate and glutamate metabolism;ko00410//beta-Alanine metabolism;ko00650//Butanoate metabolism;ko00430//Taurine and hypotaurine metabolism	K01580;K01580;K01580;K01580;K01580;K01580	-	GO:0004351//glutamate decarboxylase activity;GO:0004837//tyrosine decarboxylase activity;GO:0016831//carboxy-lyase activity;GO:0030170//pyridoxal phosphate binding	GO:0006540//glutamate decarboxylation to succinate;GO:0006572//tyrosine catabolic process;GO:0015940//pantothenate biosynthetic process;GO:0019752//carboxylic acid metabolic process;GO:0051188//cofactor biosynthetic process
State 1,2,3,4 -vs- State 1,2,3,5	SK1G00047080	4	6.22038e-15	1.80819e-13	TTA	EAY89192.1 hypothetical protein OsI_10689 [Oryza sativa Indica Group]	-	-	-	-	-	-	-
State 1,2,3,4 -vs- State 1,2,3,5	SK1G00047093	5	4.74158e-59	5.90984e-57	snu13	XP_006649713.1 PREDICTED: NHP2-like protein 1 [Oryza brachyantha]	Genetic Information Processing;Genetic Information Processing	Transcription;Translation	ko03040//Spliceosome;ko03008//Ribosome biogenesis in eukaryotes	K12845;K12845	-	-	-
State 1,2,3,4 -vs- State 1,2,3,5	SK1G00047094	5	3.44131e-18	1.17541e-16	--	EAY89206.1 hypothetical protein OsI_10702 [Oryza sativa Indica Group]	-	-	-	-	-	-	-
State 1,2,3,4 -vs- State 1,2,3,5	SK1G00047098	5	1.29454e-43	1.04749e-41	ERD7	EAY89209.1 hypothetical protein OsI_10705 [Oryza sativa Indica Group]	Cellular Processes	Transport and catabolism	ko04144//Endocytosis	K19366	-	-	-
State 1,2,3,4 -vs- State 1,2,3,5	SK1G00047100	5	2.14837e-10	4.60557e-09	LIP1	XP_015632917.1 small GTPase LIP1 isoform X2 [Oryza sativa Japonica Group]	-	-	-	-	GO:0005737//cytoplasm;GO:0005887//integral component of plasma membrane;GO:0055051//ATP-binding cassette (ABC) transporter complex, integrated substrate binding	GO:0000155//phosphorelay sensor kinase activity;GO:0003677//DNA binding;GO:0003924//GTPase activity;GO:0004672//protein kinase activity;GO:0005524//ATP binding;GO:0005525//GTP binding;GO:0008134//transcription factor binding;GO:0033230//cysteine-transporting ATPase activity;GO:0043022//ribosome binding	GO:0000160//phosphorelay signal transduction system;GO:0006109//regulation of carbohydrate metabolic process;GO:0006355//regulation of transcription, DNA-templated;GO:0006412//translation;GO:0032508//DNA duplex unwinding;GO:0033228//cysteine export;GO:0042254//ribosome biogenesis
State 1,2,3,4 -vs- State 1,2,3,5	SK1G00047117	1	6.00498e-10	1.24161e-08	TLP1	XP_015631808.1 thaumatin-like protein 1b isoform X1 [Oryza sativa Japonica Group]	-	-	-	-	-	-	-
State 1,2,3,4 -vs- State 1,2,3,5	SK1G00047204	3	1.97099e-48	1.84246e-46	RPL15	XP_015631945.1 50S ribosomal protein L15, chloroplastic [Oryza sativa Japonica Group]	Genetic Information Processing	Translation	ko03010//Ribosome	K02876	GO:0000315//organellar large ribosomal subunit;GO:0022625//cytosolic large ribosomal subunit	GO:0003735//structural constituent of ribosome	GO:0006412//translation
State 1,2,3,4 -vs- State 1,2,3,5	SK1G00047205	2	0	0	CUT1	XP_015632982.1 3-ketoacyl-CoA synthase 6 [Oryza sativa Japonica Group]	Metabolism;Metabolism;Organismal Systems;Metabolism	Global and overview maps;Global and overview maps;Environmental adaptation;Lipid metabolism	ko01100//Metabolic pathways;ko01110//Biosynthesis of secondary metabolites;ko04626//Plant-pathogen interaction;ko00062//Fatty acid elongation	K15397;K15397;K15397;K15397	GO:0016020//membrane	GO:0003985//acetyl-CoA C-acetyltransferase activity;GO:0004315//3-oxoacyl-[acyl-carrier-protein] synthase activity;GO:0004421//hydroxymethylglutaryl-CoA synthase activity;GO:0016747//transferase activity, transferring acyl groups other than amino-acyl groups	GO:0006631//fatty acid metabolic process;GO:0006633//fatty acid biosynthetic process
State 1,2,3,4 -vs- State 1,2,3,5	SK1G00047211	2	1.03862e-67	1.49367e-65	HMT-1	XP_015632081.1 homocysteine S-methyltransferase 1 [Oryza sativa Japonica Group]	Metabolism;Metabolism;Metabolism	Global and overview maps;Global and overview maps;Amino acid metabolism	ko01100//Metabolic pathways;ko01110//Biosynthesis of secondary metabolites;ko00270//Cysteine and methionine metabolism	K00547;K00547;K00547	-	GO:0008705//methionine synthase activity	GO:0009086//methionine biosynthetic process
State 1,2,3,4 -vs- State 1,2,3,5	SK1G00047227	1	8.14703e-19	2.86533e-17	GLN1-2	XP_015631679.1 glutamine synthetase cytosolic isozyme 1-2 [Oryza sativa Japonica Group]	Metabolism;Metabolism;Metabolism;Metabolism;Metabolism;Metabolism	Global and overview maps;Global and overview maps;Carbohydrate metabolism;Amino acid metabolism;Amino acid metabolism;Energy metabolism	ko01100//Metabolic pathways;ko01230//Biosynthesis of amino acids;ko00630//Glyoxylate and dicarboxylate metabolism;ko00250//Alanine, aspartate and glutamate metabolism;ko00220//Arginine biosynthesis;ko00910//Nitrogen metabolism	K01915;K01915;K01915;K01915;K01915;K01915	-	GO:0004356//glutamate-ammonia ligase activity	GO:0006542//glutamine biosynthetic process;GO:0006807//nitrogen compound metabolic process
State 1,2,3,4 -vs- State 1,2,3,5	SK1G00047243	2	2.62196e-14	7.33364e-13	WAKL14	EAY89102.1 hypothetical protein OsI_10590 [Oryza sativa Indica Group]	-	-	-	-	GO:0005887//integral component of plasma membrane	GO:0004672//protein kinase activity;GO:0005524//ATP binding;GO:0030247//polysaccharide binding	GO:0006468//protein phosphorylation
State 1,2,3,4 -vs- State 1,2,3,5	SK1G00047266	4	1.93743e-42	1.49938e-40	RINO1	AAP85531.1 myo-inositol-1-phosphate synthase INO1 [Xerophyta viscosa]	Metabolism;Metabolism;Metabolism	Global and overview maps;Global and overview maps;Carbohydrate metabolism	ko01100//Metabolic pathways;ko01110//Biosynthesis of secondary metabolites;ko00562//Inositol phosphate metabolism	K01858;K01858;K01858	-	GO:0004512//inositol-3-phosphate synthase activity	GO:0006021//inositol biosynthetic process;GO:0008654//phospholipid biosynthetic process
State 1,2,3,4 -vs- State 1,2,3,5	SK1G00047281	2	6.62222e-87	1.50791e-84	--	EAY88889.1 hypothetical protein OsI_10368 [Oryza sativa Indica Group]	-	-	-	-	-	-	-
State 1,2,3,4 -vs- State 1,2,3,5	SK1G00047283	2	1.05623e-22	4.34253e-21	ALD1	XP_015630783.1 aminotransferase ALD1 homolog [Oryza sativa Japonica Group]	Metabolism;Metabolism;Metabolism;Metabolism	Global and overview maps;Global and overview maps;Global and overview maps;Amino acid metabolism	ko01100//Metabolic pathways;ko01110//Biosynthesis of secondary metabolites;ko01230//Biosynthesis of amino acids;ko00300//Lysine biosynthesis	K10206;K10206;K10206;K10206	GO:0005737//cytoplasm	GO:0003824//catalytic activity;GO:0004400//histidinol-phosphate transaminase activity;GO:0004838//L-tyrosine:2-oxoglutarate aminotransferase activity;GO:0009016//succinyldiaminopimelate transaminase activity;GO:0016846//carbon-sulfur lyase activity;GO:0030170//pyridoxal phosphate binding;GO:0047688//aspartate 4-decarboxylase activity;GO:0048472//threonine-phosphate decarboxylase activity	GO:0000105//histidine biosynthetic process;GO:0006531//aspartate metabolic process;GO:0006559//L-phenylalanine catabolic process;GO:0006572//tyrosine catabolic process;GO:0009058//biosynthetic process;GO:0009236//cobalamin biosynthetic process;GO:0019877//diaminopimelate biosynthetic process;GO:0042398//cellular modified amino acid biosynthetic process
State 1,2,3,4 -vs- State 1,2,3,5	SK1G00047294	3	1.86228e-19	6.76401e-18	RPS10	RLN19930.1 30S ribosomal protein S10, chloroplastic [Panicum miliaceum]	Genetic Information Processing	Translation	ko03010//Ribosome	K02946	GO:0000314//organellar small ribosomal subunit;GO:0022627//cytosolic small ribosomal subunit	GO:0003735//structural constituent of ribosome;GO:0003824//catalytic activity;GO:0008236//serine-type peptidase activity;GO:0016787//hydrolase activity;GO:0047570//3-oxoadipate enol-lactonase activity	GO:0006412//translation;GO:0006508//proteolysis;GO:0009102//biotin biosynthetic process;GO:0042952//beta-ketoadipate pathway
State 1,2,3,4 -vs- State 1,2,3,5	SK1G00047306	5	2.63587e-12	6.48417e-11	At5g27470	EEC70888.1 hypothetical protein OsI_02425 [Oryza sativa Indica Group]	Genetic Information Processing	Translation	ko00970//Aminoacyl-tRNA biosynthesis	K01875	GO:0005737//cytoplasm;GO:0039679//viral occlusion body	GO:0000166//nucleotide binding;GO:0003677//DNA binding;GO:0004812//aminoacyl-tRNA ligase activity;GO:0004828//serine-tRNA ligase activity;GO:0004829//threonine-tRNA ligase activity;GO:0005524//ATP binding;GO:0042623//ATPase activity, coupled;GO:0051082//unfolded protein binding	GO:0006260//DNA replication;GO:0006418//tRNA aminoacylation for protein translation;GO:0006434//seryl-tRNA aminoacylation;GO:0006435//threonyl-tRNA aminoacylation;GO:0006457//protein folding;GO:0007059//chromosome segregation;GO:0030261//chromosome condensation
State 1,2,3,4 -vs- State 1,2,3,5	SK1G00047317	3	4.20481e-25	1.90272e-23	--	EEC74698.1 hypothetical protein OsI_10407 [Oryza sativa Indica Group]	-	-	-	-	-	-	-
State 1,2,3,4 -vs- State 1,2,3,5	SK1G00047319	5	3.91795e-97	1.06239e-94	RPS3A	XP_015631418.1 40S ribosomal protein S3a [Oryza sativa Japonica Group]	Genetic Information Processing	Translation	ko03010//Ribosome	K02984	GO:0005840//ribosome	GO:0003690//double-stranded DNA binding;GO:0003735//structural constituent of ribosome	GO:0006355//regulation of transcription, DNA-templated;GO:0006412//translation;GO:0006629//lipid metabolic process
State 1,2,3,4 -vs- State 1,2,3,5	SK1G00047321	2	8.82835e-16	2.65763e-14	ARL8A	XP_015632512.1 ADP-ribosylation factor-like protein 8a [Oryza sativa Japonica Group]	-	-	-	-	GO:0005737//cytoplasm;GO:0009898//cytoplasmic side of plasma membrane;GO:0055052//ATP-binding cassette (ABC) transporter complex, substrate-binding subunit-containing	GO:0003743//translation initiation factor activity;GO:0003924//GTPase activity;GO:0005524//ATP binding;GO:0005525//GTP binding;GO:0019001//guanyl nucleotide binding;GO:0019843//rRNA binding;GO:0031683//G-protein beta/gamma-subunit complex binding;GO:0033221//urea-transporting ATPase activity;GO:0043022//ribosome binding;GO:0051539//4 iron, 4 sulfur cluster binding	GO:0006400//tRNA modification;GO:0006412//translation;GO:0006413//translational initiation;GO:0006950//response to stress;GO:0007186//G-protein coupled receptor signaling pathway;GO:0008150//biological_process;GO:0015840//urea transport;GO:0042254//ribosome biogenesis;GO:0051186//cofactor metabolic process
State 1,2,3,4 -vs- State 1,2,3,5	SK1G00047330	5	1.45419e-11	3.40288e-10	VDAC5	XP_015632717.1 mitochondrial outer membrane protein porin 5 [Oryza sativa Japonica Group]	-	-	-	-	GO:0005741//mitochondrial outer membrane	-	GO:0055085//transmembrane transport
State 1,2,3,4 -vs- State 1,2,3,5	SK1G00047337	1	4.04054e-11	9.20052e-10	--	EEC74712.1 hypothetical protein OsI_10431 [Oryza sativa Indica Group]	-	-	-	-	-	-	-
State 1,2,3,4 -vs- State 1,2,3,5	SK1G00047365	5	7.88694e-14	2.15508e-12	Os03g0207400	EAY88976.1 hypothetical protein OsI_10462 [Oryza sativa Indica Group]	-	-	-	-	GO:0005887//integral component of plasma membrane;GO:0055052//ATP-binding cassette (ABC) transporter complex, substrate-binding subunit-containing	GO:0015413//nickel-transporting ATPase activity;GO:0016791//phosphatase activity	GO:0015675//nickel cation transport
State 1,2,3,4 -vs- State 1,2,3,5	SK1G00047372	3	2.81128e-09	5.5142e-08	gmppab	XP_015632386.1 mannose-1-phosphate guanyltransferase alpha [Oryza sativa Japonica Group]	Metabolism;Metabolism;Metabolism;Metabolism	Global and overview maps;Global and overview maps;Carbohydrate metabolism;Carbohydrate metabolism	ko01100//Metabolic pathways;ko01110//Biosynthesis of secondary metabolites;ko00520//Amino sugar and nucleotide sugar metabolism;ko00051//Fructose and mannose metabolism	K00966;K00966;K00966;K00966	GO:0005737//cytoplasm	GO:0003977//UDP-N-acetylglucosamine diphosphorylase activity;GO:0003983//UTP:glucose-1-phosphate uridylyltransferase activity;GO:0008780//acyl-[acyl-carrier-protein]-UDP-N-acetylglucosamine O-acyltransferase activity;GO:0008878//glucose-1-phosphate adenylyltransferase activity;GO:0008879//glucose-1-phosphate thymidylyltransferase activity;GO:0016410//N-acyltransferase activity;GO:0016772//transfe…	GO:0000271//polysaccharide biosynthetic process;GO:0005978//glycogen biosynthetic process;GO:0009058//biosynthetic process;GO:0009103//lipopolysaccharide biosynthetic process;GO:0009225//nucleotide-sugar metabolic process;GO:0009243//O antigen biosynthetic process;GO:0009245//lipid A biosynthetic process;GO:0009252//peptidoglycan biosynthetic process;GO:0010124//phenylacetate catabolic process;GO…
State 1,2,3,4 -vs- State 1,2,3,5	SK1G00047391	2	1.04547e-25	4.81675e-24	--	EAY88733.1 hypothetical protein OsI_10209 [Oryza sativa Indica Group]	-	-	-	-	-	GO:0004869//cysteine-type endopeptidase inhibitor activity	-
State 1,2,3,4 -vs- State 1,2,3,5	SK1G00047408	2	4.06651e-09	7.82506e-08	NFYA6	XP_015631822.1 nuclear transcription factor Y subunit A-7 [Oryza sativa Japonica Group]	-	-	-	-	-	GO:0003700//transcription factor activity, sequence-specific DNA binding	GO:0006355//regulation of transcription, DNA-templated
State 1,2,3,4 -vs- State 1,2,3,5	SK1G00047421	5	6.02666e-22	2.40809e-20	REFA1	XP_006649493.1 PREDICTED: elongation factor 1-alpha [Oryza brachyantha]	Genetic Information Processing	Translation	ko03013//RNA transport	K03231	GO:0005737//cytoplasm	GO:0003743//translation initiation factor activity;GO:0003746//translation elongation factor activity;GO:0003747//translation release factor activity;GO:0003924//GTPase activity;GO:0004781//sulfate adenylyltransferase (ATP) activity;GO:0005525//GTP binding;GO:0016620//oxidoreductase activity, acting on the aldehyde or oxo group of donors, NAD or NADP as acceptor;GO:0043022//ribosome binding;GO:00…	GO:0000103//sulfate assimilation;GO:0001514//selenocysteine incorporation;GO:0006412//translation;GO:0006413//translational initiation;GO:0006414//translational elongation;GO:0006415//translational termination;GO:0006950//response to stress;GO:0008652//cellular amino acid biosynthetic process;GO:0042254//ribosome biogenesis;GO:0055114//oxidation-reduction process
State 1,2,3,4 -vs- State 1,2,3,5	SK1G00047423	3	1.50774e-18	5.22516e-17	YLMG2	EEC74625.1 hypothetical protein OsI_10244 [Oryza sativa Indica Group]	-	-	-	-	GO:0016020//membrane	-	-
State 1,2,3,4 -vs- State 1,2,3,5	SK1G00047444	2	2.12432e-55	2.41087e-53	FDH	EAY88792.1 hypothetical protein OsI_10265 [Oryza sativa Indica Group]	Metabolism;Metabolism;Organismal Systems;Metabolism	Global and overview maps;Global and overview maps;Environmental adaptation;Lipid metabolism	ko01100//Metabolic pathways;ko01110//Biosynthesis of secondary metabolites;ko04626//Plant-pathogen interaction;ko00062//Fatty acid elongation	K15397;K15397;K15397;K15397	GO:0016020//membrane	GO:0004315//3-oxoacyl-[acyl-carrier-protein] synthase activity;GO:0016747//transferase activity, transferring acyl groups other than amino-acyl groups	GO:0006633//fatty acid biosynthetic process
State 1,2,3,4 -vs- State 1,2,3,5	SK1G00047451	5	1.99119e-39	1.41462e-37	GSVIVT00034021001	EAY88799.1 hypothetical protein OsI_10272 [Oryza sativa Indica Group]	Genetic Information Processing	Translation	ko03010//Ribosome	K02998	GO:0000314//organellar small ribosomal subunit;GO:0005840//ribosome;GO:0022627//cytosolic small ribosomal subunit	GO:0003735//structural constituent of ribosome	GO:0006412//translation
State 1,2,3,4 -vs- State 1,2,3,5	SK1G00047453	2	4.63004e-08	8.02677e-07	EREBP1	CAC83122.1 ethylene responsive protein [Oryza sativa]	-	-	-	-	GO:0005634//nucleus	GO:0003700//transcription factor activity, sequence-specific DNA binding	GO:0006338//chromatin remodeling;GO:0006355//regulation of transcription, DNA-templated;GO:0043486//histone exchange
State 1,2,3,4 -vs- State 1,2,3,5	SK1G00047455	4	3.86012e-08	6.75131e-07	RAP2-6	XP_015630586.1 ethylene-responsive transcription factor ERF073 [Oryza sativa Japonica Group]	-	-	-	-	-	GO:0003700//transcription factor activity, sequence-specific DNA binding	GO:0006355//regulation of transcription, DNA-templated
State 1,2,3,4 -vs- State 1,2,3,5	SK1G00047489	1	1.45091e-29	7.61291e-28	--	KAB8090558.1 hypothetical protein EE612_015756 [Oryza sativa]	-	-	-	-	-	-	-
State 1,2,3,4 -vs- State 1,2,3,5	SK1G00047491	3	7.94292e-20	2.93293e-18	FIP1	EAY88837.1 hypothetical protein OsI_10309 [Oryza sativa Indica Group]	-	-	-	-	-	-	-
State 1,2,3,4 -vs- State 1,2,3,5	SK1G00047495	1	1.05732e-09	2.14617e-08	Os03g0188200	XP_015627803.1 E3 ubiquitin-protein ligase Os03g0188200 [Oryza sativa Japonica Group]	-	-	-	-	GO:0000109//nucleotide-excision repair complex;GO:0005680//anaphase-promoting complex	GO:0004564//beta-fructofuranosidase activity;GO:0004575//sucrose alpha-glucosidase activity;GO:0008270//zinc ion binding;GO:0046872//metal ion binding;GO:0061630//ubiquitin protein ligase activity;GO:0097602//cullin family protein binding	GO:0006289//nucleotide-excision repair;GO:0031145//anaphase-promoting complex-dependent proteasomal ubiquitin-dependent protein catabolic process
State 1,2,3,4 -vs- State 1,2,3,5	SK1G00047500	5	1.09045e-18	3.81624e-17	--	XP_015628736.1 uncharacterized protein LOC4331891 [Oryza sativa Japonica Group]	-	-	-	-	-	-	-
State 1,2,3,4 -vs- State 1,2,3,5	SK1G00047502	2	1.35519e-08	2.48652e-07	At1g22440	EEC74659.1 hypothetical protein OsI_10323 [Oryza sativa Indica Group]	Metabolism;Metabolism;Metabolism;Metabolism;Metabolism;Metabolism	Global and overview maps;Global and overview maps;Global and overview maps;Carbohydrate metabolism;Lipid metabolism;Amino acid metabolism	ko01100//Metabolic pathways;ko01110//Biosynthesis of secondary metabolites;ko01200//Carbon metabolism;ko00010//Glycolysis / Gluconeogenesis;ko00071//Fatty acid degradation;ko00350//Tyrosine metabolism	K00121;K00121;K00121;K00121;K00121;K00121	-	GO:0004024//alcohol dehydrogenase activity, zinc-dependent;GO:0008270//zinc ion binding;GO:0008743//L-threonine 3-dehydrogenase activity;GO:0016491//oxidoreductase activity;GO:0016655//oxidoreductase activity, acting on NAD(P)H, quinone or similar compound as acceptor;GO:0018467//formaldehyde dehydrogenase activity;GO:0050607//mycothiol-dependent formaldehyde dehydrogenase activity;GO:0051287//NA…	GO:0006113//fermentation;GO:0006567//threonine catabolic process;GO:0008152//metabolic process;GO:0009404//toxin metabolic process;GO:0010127//mycothiol-dependent detoxification;GO:0019439//aromatic compound catabolic process;GO:0046292//formaldehyde metabolic process;GO:0055114//oxidation-reduction process
State 1,2,3,4 -vs- State 1,2,3,5	SK1G00047505	3	1.3731e-10	2.97955e-09	ABC4	XP_015627852.1 2-carboxy-1,4-naphthoquinone phytyltransferase, chloroplastic isoform X2 [Oryza sativa Japonica Group]	Metabolism;Metabolism;Metabolism	Global and overview maps;Global and overview maps;Metabolism of cofactors and vitamins	ko01100//Metabolic pathways;ko01110//Biosynthesis of secondary metabolites;ko00130//Ubiquinone and other terpenoid-quinone biosynthesis	K23094;K23094;K23094	GO:0016021//integral component of membrane	GO:0004659//prenyltransferase activity;GO:0016765//transferase activity, transferring alkyl or aryl (other than methyl) groups;GO:0016767//geranylgeranyl-diphosphate geranylgeranyltransferase activity;GO:0046408//chlorophyll synthetase activity;GO:0046428//1,4-dihydroxy-2-naphthoate octaprenyltransferase activity	GO:0009234//menaquinone biosynthetic process;GO:0042372//phylloquinone biosynthetic process
State 1,2,3,4 -vs- State 1,2,3,5	SK1G00047506	4	1.55114e-23	6.65455e-22	--	EAY88855.1 hypothetical protein OsI_10329 [Oryza sativa Indica Group]	-	-	-	-	-	GO:0005515//protein binding	-
State 1,2,3,4 -vs- State 1,2,3,5	SK1G00047513	4	2.31765e-08	4.14958e-07	RABH1E	ABF94402.1 Ras-related protein Rab-6A, putative, expressed [Oryza sativa Japonica Group]	-	-	-	-	GO:0005737//cytoplasm	GO:0003924//GTPase activity;GO:0005525//GTP binding;GO:0043022//ribosome binding	GO:0008150//biological_process;GO:0042254//ribosome biogenesis
State 1,2,3,4 -vs- State 1,2,3,5	SK1G00047535	1	1.17308e-09	2.37572e-08	RABF1	XP_015628467.1 ras-related protein RABF1 [Oryza sativa Japonica Group]	-	-	-	-	GO:0005737//cytoplasm	GO:0003924//GTPase activity;GO:0003968//RNA-directed RNA polymerase activity;GO:0004197//cysteine-type endopeptidase activity;GO:0005524//ATP binding;GO:0005525//GTP binding;GO:0017111//nucleoside-triphosphatase activity;GO:0019843//rRNA binding;GO:0043022//ribosome binding;GO:0051539//4 iron, 4 sulfur cluster binding	GO:0006412//translation;GO:0008150//biological_process;GO:0042254//ribosome biogenesis;GO:0051186//cofactor metabolic process
State 1,2,3,4 -vs- State 1,2,3,5	SK1G00047549	4	6.28126e-33	3.67583e-31	MO2	EEC74541.1 hypothetical protein OsI_10065 [Oryza sativa Indica Group]	-	-	-	-	GO:0009331//glycerol-3-phosphate dehydrogenase complex;GO:0016021//integral component of membrane	GO:0003824//catalytic activity;GO:0004368//glycerol-3-phosphate dehydrogenase activity;GO:0004506//squalene monooxygenase activity;GO:0004791//thioredoxin-disulfide reductase activity;GO:0015036//disulfide oxidoreductase activity;GO:0016166//phytoene dehydrogenase activity;GO:0016491//oxidoreductase activity;GO:0016647//oxidoreductase activity, acting on the CH-NH group of donors, oxygen as accep…	GO:0006071//glycerol metabolic process;GO:0006744//ubiquinone biosynthetic process;GO:0006790//sulfur compound metabolic process;GO:0009228//thiamine biosynthetic process;GO:0015995//chlorophyll biosynthetic process;GO:0016117//carotenoid biosynthetic process;GO:0018874//benzoate metabolic process;GO:0030494//bacteriochlorophyll biosynthetic process;GO:0055114//oxidation-reduction process
State 1,2,3,4 -vs- State 1,2,3,5	SK1G00047551	5	6.39791e-65	8.8776e-63	RPS9C	XP_015616973.1 40S ribosomal protein S9-2 [Oryza sativa Japonica Group]	Genetic Information Processing	Translation	ko03010//Ribosome	K02997	GO:0000314//organellar small ribosomal subunit;GO:0022627//cytosolic small ribosomal subunit	GO:0003723//RNA binding;GO:0003735//structural constituent of ribosome;GO:0019843//rRNA binding	GO:0006412//translation
State 1,2,3,4 -vs- State 1,2,3,5	SK1G00047570	4	4.04377e-09	7.78551e-08	PSAT1	EAY88614.1 hypothetical protein OsI_10089 [Oryza sativa Indica Group]	Metabolism;Metabolism;Metabolism;Metabolism;Metabolism;Metabolism;Metabolism	Global and overview maps;Global and overview maps;Global and overview maps;Global and overview maps;Amino acid metabolism;Amino acid metabolism;Metabolism of cofactors and vitamins	ko01100//Metabolic pathways;ko01110//Biosynthesis of secondary metabolites;ko01200//Carbon metabolism;ko01230//Biosynthesis of amino acids;ko00270//Cysteine and methionine metabolism;ko00260//Glycine, serine and threonine metabolism;ko00750//Vitamin B6 metabolism	K00831;K00831;K00831;K00831;K00831;K00831;K00831	-	GO:0004648//O-phospho-L-serine:2-oxoglutarate aminotransferase activity	GO:0006564//L-serine biosynthetic process
State 1,2,3,4 -vs- State 1,2,3,5	SK1G00047574	5	3.46136e-21	1.35263e-19	ECT2	XP_015629859.1 uncharacterized protein LOC4331683 isoform X1 [Oryza sativa Japonica Group]	-	-	-	-	-	GO:0003723//RNA binding	-
State 1,2,3,4 -vs- State 1,2,3,5	SK1G00047657	2	2.88497e-08	5.12143e-07	CDF2	XP_015631794.1 cyclic dof factor 1 [Oryza sativa Japonica Group]	-	-	-	-	-	GO:0003677//DNA binding	GO:0006355//regulation of transcription, DNA-templated
State 1,2,3,4 -vs- State 1,2,3,5	SK1G00047666	3	2.5483e-26	1.20213e-24	OsI_09857	XP_015629749.1 catalase-1 [Oryza sativa Japonica Group]	Metabolism;Metabolism;Metabolism;Environmental Information Processing;Cellular Processes;Metabolism;Metabolism	Global and overview maps;Global and overview maps;Global and overview maps;Signal transduction;Transport and catabolism;Carbohydrate metabolism;Amino acid metabolism	ko01100//Metabolic pathways;ko01110//Biosynthesis of secondary metabolites;ko01200//Carbon metabolism;ko04016//MAPK signaling pathway - plant;ko04146//Peroxisome;ko00630//Glyoxylate and dicarboxylate metabolism;ko00380//Tryptophan metabolism	K03781;K03781;K03781;K03781;K03781;K03781;K03781	-	GO:0004096//catalase activity;GO:0020037//heme binding	GO:0055114//oxidation-reduction process
State 1,2,3,4 -vs- State 1,2,3,5	SK1G00047673	4	1.26162e-17	4.21591e-16	4CLL4	XP_015629747.1 4-coumarate--CoA ligase-like 4 [Oryza sativa Japonica Group]	Metabolism;Metabolism;Metabolism	Global and overview maps;Global and overview maps;Lipid metabolism	ko01100//Metabolic pathways;ko01110//Biosynthesis of secondary metabolites;ko00592//alpha-Linolenic acid metabolism	K10526;K10526;K10526	-	GO:0003987//acetate-CoA ligase activity;GO:0004043//L-aminoadipate-semialdehyde dehydrogenase activity;GO:0008668//(2,3-dihydroxybenzoyl)adenylate synthase activity;GO:0008756//o-succinylbenzoate-CoA ligase activity;GO:0030729//acetoacetate-CoA ligase activity;GO:0047473//D-alanine-poly(phosphoribitol) ligase activity;GO:0050218//propionate-CoA ligase activity	GO:0009234//menaquinone biosynthetic process;GO:0019287//isopentenyl diphosphate biosynthetic process, mevalonate pathway;GO:0019290//siderophore biosynthetic process;GO:0019350//teichoic acid biosynthetic process;GO:0019427//acetyl-CoA biosynthetic process from acetate;GO:0019878//lysine biosynthetic process via aminoadipic acid
State 1,2,3,4 -vs- State 1,2,3,5	SK1G00047684	2	2.1249e-08	3.82762e-07	CEBIP	Q8H8C7.1 RecName: Full=Chitin elicitor-binding protein; Short=CEBiP; Short=OsCEBiP; AltName: Full=Lysin motif-containing protein 1; Short=Os-LYP1; Flags: Precursor [Oryza sativa Japonica Group]	Organismal Systems	Environmental adaptation	ko04626//Plant-pathogen interaction	K13473	-	GO:0003674//molecular_function	GO:0030436//asexual sporulation
State 1,2,3,4 -vs- State 1,2,3,5	SK1G00047687	5	3.73258e-08	6.55407e-07	Os03g0134300	XP_015631722.1 ATP phosphoribosyltransferase, chloroplastic [Oryza sativa Japonica Group]	Metabolism;Metabolism;Metabolism;Metabolism	Global and overview maps;Global and overview maps;Global and overview maps;Amino acid metabolism	ko01100//Metabolic pathways;ko01110//Biosynthesis of secondary metabolites;ko01230//Biosynthesis of amino acids;ko00340//Histidine metabolism	K00765;K00765;K00765;K00765	GO:0005737//cytoplasm	GO:0000287//magnesium ion binding;GO:0003879//ATP phosphoribosyltransferase activity	GO:0000105//histidine biosynthetic process
State 1,2,3,4 -vs- State 1,2,3,5	SK1G00047692	5	1.71703e-23	7.32201e-22	GSTF12	EAY88422.1 hypothetical protein OsI_09885 [Oryza sativa Indica Group]	Metabolism;Metabolism	Global and overview maps;Metabolism of other amino acids	ko01100//Metabolic pathways;ko00480//Glutathione metabolism	K00799;K00799	-	GO:0005515//protein binding	GO:0006749//glutathione metabolic process
State 1,2,3,4 -vs- State 1,2,3,5	SK1G00047693	5	2.38371e-26	1.12599e-24	GSTF11	EAY88427.1 hypothetical protein OsI_09891 [Oryza sativa Indica Group]	Metabolism;Metabolism	Global and overview maps;Metabolism of other amino acids	ko01100//Metabolic pathways;ko00480//Glutathione metabolism	K00799;K00799	-	GO:0005515//protein binding;GO:0016034//maleylacetoacetate isomerase activity	GO:0006559//L-phenylalanine catabolic process;GO:0006572//tyrosine catabolic process;GO:0006749//glutathione metabolic process
State 1,2,3,4 -vs- State 1,2,3,5	SK1G00047694	5	8.79583e-19	3.08741e-17	GSTF8	KAF0893286.1 hypothetical protein E2562_023927 [Oryza meyeriana var. granulata] [Oryza meyeriana]	Metabolism;Metabolism	Global and overview maps;Metabolism of other amino acids	ko01100//Metabolic pathways;ko00480//Glutathione metabolism	K00799;K00799	-	GO:0005515//protein binding;GO:0016034//maleylacetoacetate isomerase activity	GO:0006559//L-phenylalanine catabolic process;GO:0006572//tyrosine catabolic process;GO:0006749//glutathione metabolic process
State 1,2,3,4 -vs- State 1,2,3,5	SK1G00047706	4	9.82212e-14	2.66948e-12	Os08g0191100	EEC74472.1 hypothetical protein OsI_09921 [Oryza sativa Indica Group]	Metabolism;Metabolism;Metabolism;Metabolism;Metabolism;Metabolism;Metabolism	Global and overview maps;Global and overview maps;Global and overview maps;Global and overview maps;Carbohydrate metabolism;Carbohydrate metabolism;Global and overview maps	ko01100//Metabolic pathways;ko01110//Biosynthesis of secondary metabolites;ko01200//Carbon metabolism;ko01230//Biosynthesis of amino acids;ko00630//Glyoxylate and dicarboxylate metabolism;ko00020//Citrate cycle (TCA cycle);ko01210//2-Oxocarboxylic acid metabolism	K01681;K01681;K01681;K01681;K01681;K01681;K01681	GO:0009316//3-isopropylmalate dehydratase complex	GO:0003861//3-isopropylmalate dehydratase activity;GO:0003994//aconitate hydratase activity;GO:0004409//homoaconitate hydratase activity;GO:0047456//2-methylisocitrate dehydratase activity	GO:0006099//tricarboxylic acid cycle;GO:0009085//lysine biosynthetic process;GO:0009098//leucine biosynthetic process;GO:0019629//propionate catabolic process, 2-methylcitrate cycle
State 1,2,3,4 -vs- State 1,2,3,5	SK1G00047723	5	2.06742e-62	2.75052e-60	RPL23A	NP_001132424.1 60S ribosomal protein L23-like [Zea mays]	Genetic Information Processing	Translation	ko03010//Ribosome	K02894	GO:0000315//organellar large ribosomal subunit;GO:0005840//ribosome;GO:0022625//cytosolic large ribosomal subunit	GO:0003735//structural constituent of ribosome	GO:0006412//translation
State 1,2,3,4 -vs- State 1,2,3,5	SK1G00047725	5	2.72971e-14	7.62901e-13	--	XP_015629027.1 uncharacterized protein LOC9271987 [Oryza sativa Japonica Group]	-	-	-	-	-	-	-
State 1,2,3,4 -vs- State 1,2,3,5	SK1G00047735	5	2.21331e-29	1.15619e-27	--	EAY88482.1 hypothetical protein OsI_09953 [Oryza sativa Indica Group]	-	-	-	-	-	GO:0005515//protein binding	-
State 1,2,3,4 -vs- State 1,2,3,5	SK1G00047738	5	1.15329e-71	1.82889e-69	RPL21E	XP_015632757.1 60S ribosomal protein L21-2 [Oryza sativa Japonica Group]	Genetic Information Processing	Translation	ko03010//Ribosome	K02889	GO:0005840//ribosome	GO:0003735//structural constituent of ribosome	GO:0006412//translation
State 1,2,3,4 -vs- State 1,2,3,5	SK1G00047757	2	3.86422e-41	2.91432e-39	Os03g0144800	EAY88513.1 hypothetical protein OsI_09986 [Oryza sativa Indica Group]	-	-	-	-	GO:0016021//integral component of membrane	-	GO:0033617//mitochondrial respiratory chain complex IV assembly
State 1,2,3,4 -vs- State 1,2,3,5	SK1G00047770	1	5.33818e-12	1.2882e-10	RZPF34	XP_015628710.1 E3 ubiquitin-protein ligase RZFP34 isoform X1 [Oryza sativa Japonica Group]	Genetic Information Processing	Folding, sorting and degradation	ko04120//Ubiquitin mediated proteolysis	K10144	-	GO:0008270//zinc ion binding	-
State 1,2,3,4 -vs- State 1,2,3,5	SK1G00047772	5	1.95437e-23	8.30422e-22	TIP1-1	XP_015631095.1 probable aquaporin TIP1-1 [Oryza sativa Japonica Group]	-	-	-	-	GO:0016020//membrane	GO:0015267//channel activity	GO:0055085//transmembrane transport
State 1,2,3,4 -vs- State 1,2,3,5	SK1G00047774	5	4.88755e-11	1.10583e-09	PAO	XP_015633218.1 pheophorbide a oxygenase, chloroplastic [Oryza sativa Japonica Group]	Metabolism;Metabolism	Global and overview maps;Metabolism of cofactors and vitamins	ko01110//Biosynthesis of secondary metabolites;ko00860//Porphyrin and chlorophyll metabolism	K13071;K13071	-	GO:0010277//chlorophyllide a oxygenase [overall] activity;GO:0016491//oxidoreductase activity;GO:0051537//2 iron, 2 sulfur cluster binding	GO:0055114//oxidation-reduction process
State 1,2,3,4 -vs- State 1,2,3,5	SK1G00047781	5	6.46234e-13	1.65029e-11	LSI2	XP_015630657.1 silicon efflux transporter LSI2-like isoform X1 [Oryza sativa Japonica Group]	-	-	-	-	GO:0005664//nuclear origin of replication recognition complex;GO:0005887//integral component of plasma membrane;GO:0016021//integral component of membrane	GO:0003677//DNA binding;GO:0008509//anion transmembrane transporter activity;GO:0015105//arsenite transmembrane transporter activity;GO:0015385//sodium:proton antiporter activity	GO:0006260//DNA replication;GO:0006814//sodium ion transport;GO:0006818//hydrogen transport;GO:0006820//anion transport;GO:0015700//arsenite transport;GO:0046685//response to arsenic-containing substance;GO:0055085//transmembrane transport
State 1,2,3,4 -vs- State 1,2,3,5	SK1G00047794	5	1.59009e-17	5.28683e-16	mfsd5	EAY88269.1 hypothetical protein OsI_09722 [Oryza sativa Indica Group]	-	-	-	-	GO:0005887//integral component of plasma membrane;GO:0016021//integral component of membrane	GO:0015098//molybdate ion transmembrane transporter activity;GO:0015295//solute:proton symporter activity;GO:0022857//transmembrane transporter activity;GO:0042910//xenobiotic transporter activity	GO:0006810//transport;GO:0015689//molybdate ion transport;GO:0042908//xenobiotic transport;GO:0055085//transmembrane transport
State 1,2,3,4 -vs- State 1,2,3,5	SK1G00047797	5	3.70013e-08	6.50351e-07	FKGP	EEE58206.1 hypothetical protein OsJ_09163 [Oryza sativa Japonica Group]	Metabolism;Metabolism;Metabolism	Global and overview maps;Carbohydrate metabolism;Carbohydrate metabolism	ko01100//Metabolic pathways;ko00520//Amino sugar and nucleotide sugar metabolism;ko00051//Fructose and mannose metabolism	K05305;K05305;K05305	-	GO:0003723//RNA binding;GO:0004335//galactokinase activity;GO:0004413//homoserine kinase activity;GO:0004496//mevalonate kinase activity;GO:0004765//shikimate kinase activity;GO:0005524//ATP binding;GO:0016772//transferase activity, transferring phosphorus-containing groups;GO:0050515//4-(cytidine 5'-diphospho)-2-C-methyl-D-erythritol kinase activity	GO:0006012//galactose metabolic process;GO:0009088//threonine biosynthetic process;GO:0009423//chorismate biosynthetic process;GO:0016114//terpenoid biosynthetic process;GO:0016126//sterol biosynthetic process;GO:0019287//isopentenyl diphosphate biosynthetic process, mevalonate pathway
State 1,2,3,4 -vs- State 1,2,3,5	SK1G00047804	4	2.86787e-13	7.53496e-12	--	XP_015632654.1 uncharacterized protein LOC9267662 isoform X1 [Oryza sativa Japonica Group]	-	-	-	-	-	GO:0003674//molecular_function;GO:0047570//3-oxoadipate enol-lactonase activity;GO:0070205//2-succinyl-6-hydroxy-2,4-cyclohexadiene-1-carboxylate synthase activity	GO:0009234//menaquinone biosynthetic process;GO:0015979//photosynthesis;GO:0042952//beta-ketoadipate pathway
State 1,2,3,4 -vs- State 1,2,3,5	SK1G00047806	3	8.59109e-87	1.93147e-84	RBL2	XP_015631615.1 RHOMBOID-like protein 2 [Oryza sativa Japonica Group]	-	-	-	-	GO:0005887//integral component of plasma membrane;GO:0016021//integral component of membrane	GO:0004252//serine-type endopeptidase activity	GO:0006464//cellular protein modification process;GO:0019538//protein metabolic process
State 1,2,3,4 -vs- State 1,2,3,5	SK1G00047813	3	1.92865e-10	4.1441e-09	PEX11-1	XP_015630822.1 peroxisomal membrane protein 11-1 [Oryza sativa Japonica Group]	-	-	-	-	GO:0005779//integral component of peroxisomal membrane	-	GO:0016559//peroxisome fission
State 1,2,3,4 -vs- State 1,2,3,5	SK1G00047831	2	1.39706e-100	3.97012e-98	At1g07660	XP_016507811.1 PREDICTED: uncharacterized protein LOC107825453 [Nicotiana tabacum]	-	-	-	-	GO:0071821//FANCM-MHF complex	GO:0003677//DNA binding	GO:0006352//DNA-templated transcription, initiation
State 1,2,3,4 -vs- State 1,2,3,5	SK1G00047845	3	4.82367e-13	1.24706e-11	At3g12390	XP_015631186.1 nascent polypeptide-associated complex subunit alpha-like protein 1 [Oryza sativa Japonica Group]	-	-	-	-	-	-	-
State 1,2,3,4 -vs- State 1,2,3,5	SK1G00047849	3	2.13234e-31	1.18909e-29	RPL11	BAS82042.1 Os03g0122200, partial [Oryza sativa Japonica Group]	Genetic Information Processing	Translation	ko03010//Ribosome	K02867	GO:0000315//organellar large ribosomal subunit;GO:0005840//ribosome;GO:0022625//cytosolic large ribosomal subunit	GO:0003735//structural constituent of ribosome	GO:0006412//translation
State 1,2,3,4 -vs- State 1,2,3,5	SK1G00047869	3	3.58142e-161	1.81742e-158	RPL5	XP_015627856.1 50S ribosomal protein L5, chloroplastic [Oryza sativa Japonica Group]	Genetic Information Processing	Translation	ko03010//Ribosome	K02931	-	-	-
State 1,2,3,4 -vs- State 1,2,3,5	SK1G00047877	2	3.88694e-27	1.87089e-25	PAT1	KAB8089989.1 hypothetical protein EE612_015043 [Oryza sativa]	Metabolism;Metabolism;Metabolism;Metabolism	Global and overview maps;Global and overview maps;Global and overview maps;Amino acid metabolism	ko01100//Metabolic pathways;ko01110//Biosynthesis of secondary metabolites;ko01230//Biosynthesis of amino acids;ko00400//Phenylalanine, tyrosine and tryptophan biosynthesis	K00766;K00766;K00766;K00766	-	GO:0004048//anthranilate phosphoribosyltransferase activity;GO:0016154//pyrimidine-nucleoside phosphorylase activity;GO:0016757//transferase activity, transferring glycosyl groups	GO:0000162//tryptophan biosynthetic process;GO:0006213//pyrimidine nucleoside metabolic process
State 1,2,3,4 -vs- State 1,2,3,5	SK1G00047899	3	3.56068e-11	8.14964e-10	--	EAY88370.1 hypothetical protein OsI_09827 [Oryza sativa Indica Group]	-	-	-	-	-	-	-
State 1,2,3,4 -vs- State 1,2,3,5	SK1G00047902	1	4.46413e-13	1.15579e-11	CPK7	EEC74439.1 hypothetical protein OsI_09829 [Oryza sativa Indica Group]	Organismal Systems	Environmental adaptation	ko04626//Plant-pathogen interaction	K13412	GO:0005737//cytoplasm	GO:0000166//nucleotide binding;GO:0004672//protein kinase activity;GO:0004812//aminoacyl-tRNA ligase activity;GO:0005509//calcium ion binding;GO:0005515//protein binding;GO:0005524//ATP binding	GO:0006418//tRNA aminoacylation for protein translation;GO:0006468//protein phosphorylation
State 1,2,3,4 -vs- State 1,2,3,5	SK1G00047906	2	1.55035e-09	3.10788e-08	MLO1	AAK94907.1 seven transmembrane protein MLO2 [Oryza sativa Indica Group]	-	-	-	-	GO:0016021//integral component of membrane	-	GO:0006952//defense response
State 1,2,3,4 -vs- State 1,2,3,5	SK1G00047908	3	2.38461e-20	8.91643e-19	GAPB	XP_015630808.1 glyceraldehyde-3-phosphate dehydrogenase B, chloroplastic [Oryza sativa Japonica Group]	Metabolism;Metabolism;Metabolism	Global and overview maps;Global and overview maps;Energy metabolism	ko01100//Metabolic pathways;ko01200//Carbon metabolism;ko00710//Carbon fixation in photosynthetic organisms	K05298;K05298;K05298	-	GO:0004073//aspartate-semialdehyde dehydrogenase activity;GO:0016620//oxidoreductase activity, acting on the aldehyde or oxo group of donors, NAD or NADP as acceptor;GO:0048001//erythrose-4-phosphate dehydrogenase activity;GO:0051287//NAD binding	GO:0006094//gluconeogenesis;GO:0006096//glycolytic process;GO:0008615//pyridoxine biosynthetic process;GO:0009086//methionine biosynthetic process;GO:0009088//threonine biosynthetic process;GO:0009089//lysine biosynthetic process via diaminopimelate;GO:0009097//isoleucine biosynthetic process;GO:0019682//glyceraldehyde-3-phosphate metabolic process;GO:0055114//oxidation-reduction process
State 1,2,3,4 -vs- State 1,2,3,5	SK1G00047926	3	1.31555e-08	2.41879e-07	--	XP_015620836.1 uncharacterized protein LOC107279817 [Oryza sativa Japonica Group]	-	-	-	-	-	-	-
State 1,2,3,4 -vs- State 1,2,3,5	SK1G00047930	5	1.71142e-09	3.4211e-08	ATP1	XP_015628426.1 probable pterin-4-alpha-carbinolamine dehydratase, chloroplastic [Oryza sativa Japonica Group]	-	-	-	-	-	GO:0008124//4-alpha-hydroxytetrahydrobiopterin dehydratase activity	GO:0006729//tetrahydrobiopterin biosynthetic process
State 1,2,3,4 -vs- State 1,2,3,5	SK1G00047954	3	6.36816e-45	5.4247e-43	AZI1	XP_015632237.1 cortical cell-delineating protein [Oryza sativa Japonica Group]	-	-	-	-	-	-	-
State 1,2,3,4 -vs- State 1,2,3,5	SK1G00047955	4	2.64384e-34	1.62482e-32	EARLI1	BAJ08376.1 qLTG3-1 [Oryza sativa Indica Group]	-	-	-	-	-	-	-
State 1,2,3,4 -vs- State 1,2,3,5	SK1G00048001	5	5.53979e-25	2.49094e-23	RPS17C	EEC74366.1 hypothetical protein OsI_09682 [Oryza sativa Indica Group]	Genetic Information Processing	Translation	ko03010//Ribosome	K02962	GO:0005840//ribosome	GO:0003735//structural constituent of ribosome	GO:0006412//translation
State 1,2,3,4 -vs- State 1,2,3,5	SK1G00048002	5	3.21591e-22	1.30109e-20	At1g73230	EAY88231.1 hypothetical protein OsI_09683 [Oryza sativa Indica Group]	-	-	-	-	-	-	-
State 1,2,3,4 -vs- State 1,2,3,5	SK1G00048009	4	6.72764e-48	6.19117e-46	--	XP_015628265.1 uncharacterized protein LOC9267060 [Oryza sativa Japonica Group]	-	-	-	-	-	-	-
State 1,2,3,4 -vs- State 1,2,3,5	SK1G00048059	3	3.69882e-08	6.50351e-07	OOP	BAD22947.1 oligopeptidase A-like [Oryza sativa Japonica Group]	-	-	-	-	-	GO:0004222//metalloendopeptidase activity;GO:0005524//ATP binding;GO:0030983//mismatched DNA binding	GO:0006298//mismatch repair;GO:0006508//proteolysis
State 1,2,3,4 -vs- State 1,2,3,5	SK1G00048072	4	1.68793e-08	3.06851e-07	--	EEE58098.1 hypothetical protein OsJ_08971 [Oryza sativa Japonica Group]	-	-	-	-	-	-	-
State 1,2,3,4 -vs- State 1,2,3,5	SK1G00048097	2	1.03075e-22	4.24992e-21	CYP714C3	EAY88082.1 hypothetical protein OsI_09512 [Oryza sativa Indica Group]	-	-	-	-	-	GO:0005506//iron ion binding;GO:0016705//oxidoreductase activity, acting on paired donors, with incorporation or reduction of molecular oxygen;GO:0020037//heme binding	GO:0055114//oxidation-reduction process
State 1,2,3,4 -vs- State 1,2,3,5	SK1G00048110	3	6.19004e-34	3.78455e-32	RPL9	EAY88068.1 hypothetical protein OsI_09498 [Oryza sativa Indica Group]	Genetic Information Processing	Translation	ko03010//Ribosome	K02939	GO:0000311//plastid large ribosomal subunit;GO:0022625//cytosolic large ribosomal subunit	GO:0003735//structural constituent of ribosome;GO:0016538//cyclin-dependent protein serine/threonine kinase regulator activity	GO:0006412//translation;GO:0044419//interspecies interaction between organisms
State 1,2,3,4 -vs- State 1,2,3,5	SK1G00048120	2	1.10849e-08	2.05404e-07	CRCK2	XP_015623697.1 calmodulin-binding receptor-like cytoplasmic kinase 2 [Oryza sativa Japonica Group]	-	-	-	-	-	GO:0004672//protein kinase activity;GO:0005524//ATP binding	GO:0006468//protein phosphorylation
State 1,2,3,4 -vs- State 1,2,3,5	SK1G00048121	5	1.75847e-68	2.61357e-66	RPL28A	XP_006654725.2 PREDICTED: 60S ribosomal protein L28-1-like [Oryza brachyantha]	Genetic Information Processing	Translation	ko03010//Ribosome	K02903	-	-	-
State 1,2,3,4 -vs- State 1,2,3,5	SK1G00048132	4	1.04537e-44	8.75797e-43	dnlz	EAY88046.1 hypothetical protein OsI_09474 [Oryza sativa Indica Group]	-	-	-	-	-	GO:0008270//zinc ion binding	-
State 1,2,3,4 -vs- State 1,2,3,5	SK1G00048135	2	2.82627e-44	2.32935e-42	LPA1	XP_015625422.1 P-loop NTPase domain-containing protein LPA1 [Oryza sativa Japonica Group]	-	-	-	-	GO:0005887//integral component of plasma membrane;GO:0009898//cytoplasmic side of plasma membrane;GO:0043190//ATP-binding cassette (ABC) transporter complex;GO:0055051//ATP-binding cassette (ABC) transporter complex, integrated substrate binding	GO:0003723//RNA binding;GO:0003724//RNA helicase activity;GO:0003924//GTPase activity;GO:0004020//adenylylsulfate kinase activity;GO:0005524//ATP binding;GO:0005525//GTP binding;GO:0015413//nickel-transporting ATPase activity;GO:0016301//kinase activity;GO:0019001//guanyl nucleotide binding;GO:0031683//G-protein beta/gamma-subunit complex binding;GO:0033230//cysteine-transporting ATPase activity;…	GO:0006790//sulfur compound metabolic process;GO:0006810//transport;GO:0007186//G-protein coupled receptor signaling pathway;GO:0015675//nickel cation transport;GO:0033228//cysteine export
State 1,2,3,4 -vs- State 1,2,3,5	SK1G00048155	1	2.19909e-23	9.31063e-22	XI-B	BAD21517.1 putative myosin subfamily XI heavy chain [Oryza sativa Japonica Group]	-	-	-	-	GO:0016459//myosin complex	GO:0000155//phosphorelay sensor kinase activity;GO:0003774//motor activity;GO:0004672//protein kinase activity;GO:0005515//protein binding;GO:0005524//ATP binding	GO:0000160//phosphorelay signal transduction system;GO:0000910//cytokinesis;GO:0006109//regulation of carbohydrate metabolic process;GO:0006810//transport;GO:0007059//chromosome segregation;GO:0030261//chromosome condensation
State 1,2,3,4 -vs- State 1,2,3,5	SK1G00048169	5	7.12792e-09	1.3418e-07	ADHIII	A2XAZ3.1 RecName: Full=Alcohol dehydrogenase class-3; AltName: Full=Alcohol dehydrogenase class-III; AltName: Full=Glutathione-dependent formaldehyde dehydrogenase; Short=FALDH; Short=FDH; Short=GSH-FDH; AltName: Full=S-(hydroxymethyl)glutathione dehydrogenase [Oryza sativa Indica Group]	Metabolism;Metabolism;Metabolism;Metabolism;Metabolism;Metabolism	Global and overview maps;Global and overview maps;Global and overview maps;Carbohydrate metabolism;Lipid metabolism;Amino acid metabolism	ko01100//Metabolic pathways;ko01110//Biosynthesis of secondary metabolites;ko01200//Carbon metabolism;ko00010//Glycolysis / Gluconeogenesis;ko00071//Fatty acid degradation;ko00350//Tyrosine metabolism	K00121;K00121;K00121;K00121;K00121;K00121	-	GO:0004013//adenosylhomocysteinase activity;GO:0004024//alcohol dehydrogenase activity, zinc-dependent;GO:0008270//zinc ion binding;GO:0008743//L-threonine 3-dehydrogenase activity;GO:0016491//oxidoreductase activity;GO:0016616//oxidoreductase activity, acting on the CH-OH group of donors, NAD or NADP as acceptor;GO:0016655//oxidoreductase activity, acting on NAD(P)H, quinone or similar compound …	GO:0006113//fermentation;GO:0006567//threonine catabolic process;GO:0006730//one-carbon metabolic process;GO:0006813//potassium ion transport;GO:0008152//metabolic process;GO:0009404//toxin metabolic process;GO:0010127//mycothiol-dependent detoxification;GO:0019439//aromatic compound catabolic process;GO:0030494//bacteriochlorophyll biosynthetic process;GO:0046292//formaldehyde metabolic process;…
State 1,2,3,4 -vs- State 1,2,3,5	SK1G00048172	3	8.88558e-09	1.65948e-07	CP29B	EAY88000.1 hypothetical protein OsI_09422 [Oryza sativa Indica Group]	-	-	-	-	-	GO:0003676//nucleic acid binding	GO:0008380//RNA splicing
State 1,2,3,4 -vs- State 1,2,3,5	SK1G00048174	5	1.51072e-19	5.50399e-18	RPL37B	BAS81554.1 Os02g0815000 [Oryza sativa Japonica Group]	Genetic Information Processing	Translation	ko03010//Ribosome	K02922	GO:0005840//ribosome	GO:0003735//structural constituent of ribosome;GO:0033743//peptide-methionine (R)-S-oxide reductase activity	GO:0006412//translation;GO:0055114//oxidation-reduction process
State 1,2,3,4 -vs- State 1,2,3,5	SK1G00048177	5	1.55984e-71	2.46261e-69	RPL23A	NP_001132424.1 60S ribosomal protein L23-like [Zea mays]	Genetic Information Processing	Translation	ko03010//Ribosome	K02894	GO:0000315//organellar large ribosomal subunit;GO:0005840//ribosome;GO:0022625//cytosolic large ribosomal subunit	GO:0003735//structural constituent of ribosome	GO:0006412//translation
State 1,2,3,4 -vs- State 1,2,3,5	SK1G00048183	5	3.36967e-22	1.35865e-20	DESI1	KAB8089469.1 hypothetical protein EE612_014428 [Oryza sativa]	-	-	-	-	-	GO:0008233//peptidase activity	-
State 1,2,3,4 -vs- State 1,2,3,5	SK1G00048223	2	1.1517e-09	2.33376e-08	Os02g0806900	EAY87933.1 hypothetical protein OsI_09357 [Oryza sativa Indica Group]	Metabolism;Metabolism	Global and overview maps;Lipid metabolism	ko01100//Metabolic pathways;ko00600//Sphingolipid metabolism	K00654;K00654	-	GO:0003824//catalytic activity;GO:0003870//5-aminolevulinate synthase activity;GO:0008710//8-amino-7-oxononanoate synthase activity;GO:0008890//glycine C-acetyltransferase activity;GO:0018826//methionine gamma-lyase activity;GO:0030170//pyridoxal phosphate binding	GO:0006567//threonine catabolic process;GO:0006783//heme biosynthetic process;GO:0009058//biosynthetic process;GO:0009087//methionine catabolic process;GO:0009093//cysteine catabolic process;GO:0009102//biotin biosynthetic process;GO:0019346//transsulfuration
State 1,2,3,4 -vs- State 1,2,3,5	SK1G00048228	5	8.63113e-24	3.73896e-22	GATA8	XP_015626107.1 GATA transcription factor 11 [Oryza sativa Japonica Group]	-	-	-	-	-	GO:0008270//zinc ion binding;GO:0043565//sequence-specific DNA binding	GO:0006355//regulation of transcription, DNA-templated
State 1,2,3,4 -vs- State 1,2,3,5	SK1G00048295	5	3.82476e-82	7.54795e-80	RPL39A	RZC15298.1 60S ribosomal protein L39 [Glycine soja]	Genetic Information Processing	Translation	ko03010//Ribosome	K02924	GO:0005840//ribosome	GO:0003735//structural constituent of ribosome	GO:0006412//translation
State 1,2,3,4 -vs- State 1,2,3,5	SK1G00048297	5	1.0367e-28	5.28348e-27	RPL39A	RZC15298.1 60S ribosomal protein L39 [Glycine soja]	Genetic Information Processing	Translation	ko03010//Ribosome	K02924	GO:0005840//ribosome	GO:0003735//structural constituent of ribosome	GO:0006412//translation
State 1,2,3,4 -vs- State 1,2,3,5	SK1G00048332	4	2.0101e-19	7.29345e-18	TIC55	XP_015627610.1 protein TIC 55, chloroplastic [Oryza sativa Japonica Group]	-	-	-	-	-	GO:0010277//chlorophyllide a oxygenase [overall] activity;GO:0016491//oxidoreductase activity;GO:0018618//anthranilate 1,2-dioxygenase (deaminating, decarboxylating) activity;GO:0051537//2 iron, 2 sulfur cluster binding	GO:0006569//tryptophan catabolic process;GO:0055114//oxidation-reduction process
State 1,2,3,4 -vs- State 1,2,3,5	SK1G00048352	3	2.06262e-31	1.15202e-29	v1g171563	XP_015625062.1 eukaryotic translation initiation factor 3 subunit G [Oryza sativa Japonica Group]	Genetic Information Processing	Translation	ko03013//RNA transport	K03248	-	GO:0003676//nucleic acid binding	GO:0008380//RNA splicing
State 1,2,3,4 -vs- State 1,2,3,5	SK1G00048366	5	8.96304e-68	1.29425e-65	RPL35AA	XP_015627611.1 60S ribosomal protein L35a-1 [Oryza sativa Japonica Group]	Genetic Information Processing	Translation	ko03010//Ribosome	K02917	GO:0005840//ribosome	GO:0003723//RNA binding;GO:0003735//structural constituent of ribosome	GO:0006364//rRNA processing;GO:0006412//translation
State 1,2,3,4 -vs- State 1,2,3,5	SK1G00048427	5	6.48055e-13	1.65375e-11	OVA2	TVU28777.1 hypothetical protein EJB05_20310 [Eragrostis curvula]	Genetic Information Processing	Translation	ko00970//Aminoacyl-tRNA biosynthesis	K01870	GO:0005737//cytoplasm	GO:0000166//nucleotide binding;GO:0002161//aminoacyl-tRNA editing activity;GO:0004812//aminoacyl-tRNA ligase activity;GO:0004817//cysteine-tRNA ligase activity;GO:0004822//isoleucine-tRNA ligase activity;GO:0004823//leucine-tRNA ligase activity;GO:0004825//methionine-tRNA ligase activity;GO:0004832//valine-tRNA ligase activity;GO:0005524//ATP binding	GO:0006418//tRNA aminoacylation for protein translation;GO:0006423//cysteinyl-tRNA aminoacylation;GO:0006428//isoleucyl-tRNA aminoacylation;GO:0006429//leucyl-tRNA aminoacylation;GO:0006431//methionyl-tRNA aminoacylation;GO:0006438//valyl-tRNA aminoacylation;GO:0007059//chromosome segregation;GO:0010125//mycothiol biosynthetic process;GO:0030261//chromosome condensation
State 1,2,3,4 -vs- State 1,2,3,5	SK1G00048455	5	2.03583e-09	4.03328e-08	Os02g0773300	XP_015626189.1 putative D-cysteine desulfhydrase 1, mitochondrial [Oryza sativa Japonica Group]	Metabolism;Metabolism	Global and overview maps;Amino acid metabolism	ko01100//Metabolic pathways;ko00270//Cysteine and methionine metabolism	K05396;K05396	-	GO:0008660//1-aminocyclopropane-1-carboxylate deaminase activity	GO:0042217//1-aminocyclopropane-1-carboxylate catabolic process
State 1,2,3,4 -vs- State 1,2,3,5	SK1G00048466	2	3.35219e-17	1.09244e-15	DSP2	Q0DX67.2 RecName: Full=Probable tyrosine-protein phosphatase DSP2; AltName: Full=Protein PLANT AND FUNGI ATYPICAL DUAL-SPECIFICITY PHOSPHATASE 2; Short=OsPFA-DSP2 [Oryza sativa Japonica Group]	-	-	-	-	-	GO:0004721//phosphoprotein phosphatase activity;GO:0004725//protein tyrosine phosphatase activity	GO:0006470//protein dephosphorylation
State 1,2,3,4 -vs- State 1,2,3,5	SK1G00048468	2	1.10042e-10	2.40104e-09	COP1	XP_015627602.1 E3 ubiquitin-protein ligase COP1 [Oryza sativa Japonica Group]	Genetic Information Processing;Organismal Systems	Folding, sorting and degradation;Environmental adaptation	ko04120//Ubiquitin mediated proteolysis;ko04712//Circadian rhythm - plant	K10143;K10143	GO:0000109//nucleotide-excision repair complex	GO:0005515//protein binding;GO:0008270//zinc ion binding;GO:0046872//metal ion binding;GO:0061630//ubiquitin protein ligase activity	GO:0006289//nucleotide-excision repair
State 1,2,3,4 -vs- State 1,2,3,5	SK1G00048471	1	7.879e-13	2.00056e-11	--	-	-	-	-	-	-	-	-
State 1,2,3,4 -vs- State 1,2,3,5	SK1G00048498	4	1.47192e-38	1.01921e-36	MPT3	XP_015626603.1 mitochondrial phosphate carrier protein 3, mitochondrial [Oryza sativa Japonica Group]	-	-	-	-	-	-	-
State 1,2,3,4 -vs- State 1,2,3,5	SK1G00048504	3	1.70225e-12	4.23736e-11	--	XP_015622879.1 uncharacterized protein LOC4330840 isoform X2 [Oryza sativa Japonica Group]	-	-	-	-	-	-	GO:0006323//DNA packaging
State 1,2,3,4 -vs- State 1,2,3,5	SK1G00048515	2	5.66574e-223	5.16047e-220	ERF110	XP_015624274.1 ethylene-responsive transcription factor ERF109 [Oryza sativa Japonica Group]	-	-	-	-	-	GO:0003700//transcription factor activity, sequence-specific DNA binding	GO:0006355//regulation of transcription, DNA-templated;GO:0045087//innate immune response
State 1,2,3,4 -vs- State 1,2,3,5	SK1G00048523	3	4.16938e-10	8.73014e-09	At5g16450	EAY87625.1 hypothetical protein OsI_09036 [Oryza sativa Indica Group]	-	-	-	-	-	GO:0008428//ribonuclease inhibitor activity	GO:0051252//regulation of RNA metabolic process
State 1,2,3,4 -vs- State 1,2,3,5	SK1G00048534	5	1.12228e-50	1.11046e-48	PHOS34	XP_015625371.1 universal stress protein PHOS34 [Oryza sativa Japonica Group]	-	-	-	-	-	-	-
State 1,2,3,4 -vs- State 1,2,3,5	SK1G00048543	4	1.23457e-15	3.67599e-14	ATL11	AAS91046.1 RING/C3HC4/PHD zinc finger-like protein [Oryza sativa Japonica Group]	-	-	-	-	GO:0000109//nucleotide-excision repair complex;GO:0005680//anaphase-promoting complex	GO:0008270//zinc ion binding;GO:0046872//metal ion binding;GO:0061630//ubiquitin protein ligase activity;GO:0097602//cullin family protein binding	GO:0006289//nucleotide-excision repair;GO:0009116//nucleoside metabolic process;GO:0031145//anaphase-promoting complex-dependent proteasomal ubiquitin-dependent protein catabolic process
State 1,2,3,4 -vs- State 1,2,3,5	SK1G00048548	5	1.44112e-82	2.87593e-80	HSP24.1	XP_015626255.1 24.1 kDa heat shock protein, mitochondrial isoform X2 [Oryza sativa Japonica Group]	Genetic Information Processing	Folding, sorting and degradation	ko04141//Protein processing in endoplasmic reticulum	K13993	-	-	-
State 1,2,3,4 -vs- State 1,2,3,5	SK1G00048554	5	1.34853e-48	1.26726e-46	PHI-1	KAF3793729.1 EXORDIUM-like 4 protein [Nymphaea thermarum]	-	-	-	-	GO:0012506//vesicle membrane	GO:0005198//structural molecule activity	-
State 1,2,3,4 -vs- State 1,2,3,5	SK1G00048557	2	7.76903e-19	2.74053e-17	UGT85A24	EAY87581.1 hypothetical protein OsI_08991 [Oryza sativa Indica Group]	-	-	-	-	-	GO:0008194//UDP-glycosyltransferase activity;GO:0016758//transferase activity, transferring hexosyl groups	-
State 1,2,3,4 -vs- State 1,2,3,5	SK1G00048568	3	2.90078e-37	1.95155e-35	RPL29	EAY87568.1 hypothetical protein OsI_08980 [Oryza sativa Indica Group]	Genetic Information Processing	Translation	ko03010//Ribosome	K02904	GO:0000315//organellar large ribosomal subunit;GO:0005840//ribosome;GO:0022625//cytosolic large ribosomal subunit	GO:0003735//structural constituent of ribosome	GO:0006412//translation
State 1,2,3,4 -vs- State 1,2,3,5	SK1G00048572	1	1.79148e-95	4.74903e-93	ANNAT7	ADE61246.1 annexin 2 [Oryza sativa Indica Group]	-	-	-	-	-	GO:0005509//calcium ion binding;GO:0005544//calcium-dependent phospholipid binding	-
State 1,2,3,4 -vs- State 1,2,3,5	SK1G00048598	3	3.01397e-25	1.37083e-23	--	EAY87539.1 hypothetical protein OsI_08947 [Oryza sativa Indica Group]	-	-	-	-	-	GO:0003690//double-stranded DNA binding	GO:0006355//regulation of transcription, DNA-templated
State 1,2,3,4 -vs- State 1,2,3,5	SK1G00048601	2	2.46999e-16	7.68966e-15	SK1	XP_015626759.1 shikimate kinase 1, chloroplastic [Oryza sativa Japonica Group]	Metabolism;Metabolism;Metabolism;Metabolism	Global and overview maps;Global and overview maps;Global and overview maps;Amino acid metabolism	ko01100//Metabolic pathways;ko01110//Biosynthesis of secondary metabolites;ko01230//Biosynthesis of amino acids;ko00400//Phenylalanine, tyrosine and tryptophan biosynthesis	K00891;K00891;K00891;K00891	GO:0005575//cellular_component;GO:0005737//cytoplasm;GO:0009898//cytoplasmic side of plasma membrane;GO:0043190//ATP-binding cassette (ABC) transporter complex;GO:0055052//ATP-binding cassette (ABC) transporter complex, substrate-binding subunit-containing	GO:0003896//DNA primase activity;GO:0004127//cytidylate kinase activity;GO:0004140//dephospho-CoA kinase activity;GO:0005524//ATP binding;GO:0015413//nickel-transporting ATPase activity;GO:0015614//D-xylose-importing ATPase activity;GO:0016887//ATPase activity	GO:0006139//nucleobase-containing compound metabolic process;GO:0006260//DNA replication;GO:0006400//tRNA modification;GO:0008150//biological_process;GO:0015675//nickel cation transport;GO:0015753//D-xylose transport;GO:0015937//coenzyme A biosynthetic process;GO:0015949//nucleobase-containing small molecule interconversion
State 1,2,3,4 -vs- State 1,2,3,5	SK1G00048665	2	3.48754e-18	1.19005e-16	At5g55050	XP_015623832.1 GDSL esterase/lipase At1g71250 [Oryza sativa Japonica Group]	-	-	-	-	-	GO:0016788//hydrolase activity, acting on ester bonds	-
State 1,2,3,4 -vs- State 1,2,3,5	SK1G00048673	4	5.01542e-18	1.69998e-16	FH16	XP_015625870.1 formin-like protein 16 [Oryza sativa Japonica Group]	-	-	-	-	-	-	GO:0006260//DNA replication
State 1,2,3,4 -vs- State 1,2,3,5	SK1G00048677	4	1.01796e-25	4.70219e-24	GLU10	XP_015622868.1 endoglucanase 7 [Oryza sativa Japonica Group]	-	-	-	-	-	GO:0004553//hydrolase activity, hydrolyzing O-glycosyl compounds	GO:0005975//carbohydrate metabolic process
[truncated: 1,113 more rows]
