# Supplementary material for: Multiomics analysis of the molecular and single-cell responses of rice after deep-space flight on Chang'e-5
Source: Research Square preprint supplement (doi:10.21203/rs.3.rs-7211908/v1), 2025-08-22
Supplement: Supplementary file 6 [file ae8cc967dfe0c9fafb07bae2.xlsx]

## Sheet: Sheet1
Supplementary Data 8. Genes affecting the differentiation fate of SL-6 to SL-16.
Branch	Gene ID	Gene_cluster	P_value	FDR	Symbol	Description	KEGG_A_class	KEGG_B_class	Pathway	K_ID	GO Component	GO Function	GO Process
State 1,3,4 -vs- State 1,3,5	SK1G00039333	2	1.0375e-09	7.91494e-08	CBSCBSPB3	XP_015622509.1 CBS domain-containing protein CBSCBSPB3 isoform X1 [Oryza sativa Japonica Group]	-	-	-	-	-	GO:0003938//IMP dehydrogenase activity;GO:0005515//protein binding;GO:0016853//isomerase activity	GO:0005975//carbohydrate metabolic process;GO:0009152//purine ribonucleotide biosynthetic process
State 1,3,4 -vs- State 1,3,5	SK1G00039337	2	1.0295e-11	1.0542e-09	RGLG3	EEE56046.1 hypothetical protein OsJ_04843 [Oryza sativa Japonica Group]	-	-	-	-	-	GO:0046872//metal ion binding	-
State 1,3,4 -vs- State 1,3,5	SK1G00039419	3	4.6333e-24	1.1986e-21	--	XP_025878262.1 cysteine-rich and transmembrane domain-containing protein WIH1-like [Oryza sativa Japonica Group]	-	-	-	-	-	-	-
State 1,3,4 -vs- State 1,3,5	SK1G00039428	2	7.50459e-19	1.47544e-16	BANGLUC	XP_015651097.1 glucan endo-1,3-beta-glucosidase GV [Oryza sativa Japonica Group]	-	-	-	-	-	GO:0004553//hydrolase activity, hydrolyzing O-glycosyl compounds	GO:0005975//carbohydrate metabolic process
State 1,3,4 -vs- State 1,3,5	SK1G00039429	2	1.97801e-40	1.13426e-37	BANGLUC	EAY77193.1 hypothetical protein OsI_05162 [Oryza sativa Indica Group]	-	-	-	-	-	GO:0004553//hydrolase activity, hydrolyzing O-glycosyl compounds	GO:0005975//carbohydrate metabolic process
State 1,3,4 -vs- State 1,3,5	SK1G00039448	2	5.57755e-26	1.61262e-23	VIT_06s0061g00120	EAY77172.1 hypothetical protein OsI_05142 [Oryza sativa Indica Group]	-	-	-	-	-	GO:0004553//hydrolase activity, hydrolyzing O-glycosyl compounds	GO:0005975//carbohydrate metabolic process
State 1,3,4 -vs- State 1,3,5	SK1G00039462	3	2.33789e-10	1.98522e-08	At3g12390	XP_015622168.1 nascent polypeptide-associated complex subunit alpha-like protein 1 [Oryza sativa Japonica Group]	-	-	-	-	-	-	-
State 1,3,4 -vs- State 1,3,5	SK1G00039480	2	1.30586e-10	1.15204e-08	faeA	XP_015616791.1 probable feruloyl esterase A [Oryza sativa Japonica Group]	-	-	-	-	-	GO:0016787//hydrolase activity	GO:0006629//lipid metabolic process
State 1,3,4 -vs- State 1,3,5	SK1G00039521	2	2.24361e-24	5.89264e-22	Hgsnat	XP_015621257.1 heparan-alpha-glucosaminide N-acetyltransferase isoform X1 [Oryza sativa Japonica Group]	Metabolism;Metabolism	Global and overview maps;Glycan biosynthesis and metabolism	ko01100//Metabolic pathways;ko00531//Glycosaminoglycan degradation	K10532;K10532	-	-	-
State 1,3,4 -vs- State 1,3,5	SK1G00039527	1	1.05327e-11	1.07534e-09	--	EAY77085.1 hypothetical protein OsI_05046 [Oryza sativa Indica Group]	-	-	-	-	-	-	-
State 1,3,4 -vs- State 1,3,5	SK1G00039550	2	3.49175e-10	2.84685e-08	pitC	XP_015636207.1 phosphatidylinositol transfer protein 3 [Oryza sativa Japonica Group]	-	-	-	-	-	-	-
State 1,3,4 -vs- State 1,3,5	SK1G00039682	2	9.47174e-27	2.90969e-24	RGLG2	XP_015616475.1 E3 ubiquitin-protein ligase RGLG2 [Oryza sativa Japonica Group]	-	-	-	-	-	GO:0046872//metal ion binding	-
State 1,3,4 -vs- State 1,3,5	SK1G00039702	3	8.99244e-12	9.23564e-10	FBA3	XP_015613809.1 fructose-bisphosphate aldolase 3, cytoplasmic [Oryza sativa Japonica Group]	Metabolism;Metabolism;Metabolism;Metabolism;Metabolism;Metabolism;Metabolism;Metabolism	Global and overview maps;Global and overview maps;Global and overview maps;Global and overview maps;Carbohydrate metabolism;Energy metabolism;Carbohydrate metabolism;Carbohydrate metabolism	ko01100//Metabolic pathways;ko01110//Biosynthesis of secondary metabolites;ko01200//Carbon metabolism;ko01230//Biosynthesis of amino acids;ko00010//Glycolysis / Gluconeogenesis;ko00710//Carbon fixation in photosynthetic organisms;ko00051//Fructose and mannose metabolism;ko00030//Pentose phosphate pathway	K01623;K01623;K01623;K01623;K01623;K01623;K01623;K01623	-	GO:0004332//fructose-bisphosphate aldolase activity;GO:0050371//tyrosine phenol-lyase activity	GO:0006096//glycolytic process;GO:0006570//tyrosine metabolic process
State 1,3,4 -vs- State 1,3,5	SK1G00039762	5	1.07085e-15	1.58809e-13	RPL5B	XP_015614983.1 60S ribosomal protein L5-2 [Oryza sativa Japonica Group]	Genetic Information Processing	Translation	ko03010//Ribosome	K02932	GO:0005840//ribosome	GO:0003735//structural constituent of ribosome;GO:0008097//5S rRNA binding	GO:0006412//translation
State 1,3,4 -vs- State 1,3,5	SK1G00039780	2	9.67022e-42	5.94132e-39	ILK1	XP_015628917.1 integrin-linked protein kinase 1 isoform X1 [Oryza sativa Japonica Group]	-	-	-	-	-	GO:0004672//protein kinase activity;GO:0005515//protein binding;GO:0005524//ATP binding	GO:0006468//protein phosphorylation
State 1,3,4 -vs- State 1,3,5	SK1G00039886	2	2.04165e-20	4.59117e-18	At1g15680	EAY76684.1 hypothetical protein OsI_04639 [Oryza sativa Indica Group]	-	-	-	-	-	GO:0005515//protein binding	-
State 1,3,4 -vs- State 1,3,5	SK1G00040053	2	8.52976e-12	8.78668e-10	LAC7	PWZ31531.1 Laccase-7 [Zea mays]	-	-	-	-	-	GO:0005375//copper ion transmembrane transporter activity;GO:0005507//copper ion binding;GO:0016491//oxidoreductase activity	GO:0006825//copper ion transport;GO:0055114//oxidation-reduction process
State 1,3,4 -vs- State 1,3,5	SK1G00040110	3	4.07668e-17	7.08395e-15	--	EEC71768.1 hypothetical protein OsI_04378 [Oryza sativa Indica Group]	-	-	-	-	-	GO:0005543//phospholipid binding	-
State 1,3,4 -vs- State 1,3,5	SK1G00040156	5	1.93519e-18	3.71968e-16	RPS23	EAZ14059.1 hypothetical protein OsJ_03983 [Oryza sativa Japonica Group]	Genetic Information Processing	Translation	ko03010//Ribosome	K02973	GO:0000314//organellar small ribosomal subunit;GO:0005634//nucleus;GO:0005840//ribosome;GO:0022627//cytosolic small ribosomal subunit	GO:0003677//DNA binding;GO:0003735//structural constituent of ribosome;GO:0004879//RNA polymerase II transcription factor activity, ligand-activated sequence-specific DNA binding;GO:0005496//steroid binding	GO:0006355//regulation of transcription, DNA-templated;GO:0006412//translation;GO:0030521//androgen receptor signaling pathway
State 1,3,4 -vs- State 1,3,5	SK1G00040234	1	2.5885e-76	3.71084e-73	EXPA2	XP_015625064.1 expansin-A2 [Oryza sativa Japonica Group]	-	-	-	-	-	-	-
State 1,3,4 -vs- State 1,3,5	SK1G00040291	5	3.58968e-09	2.54129e-07	VAR3	EEC71698.1 hypothetical protein OsI_04199 [Oryza sativa Indica Group]	-	-	-	-	-	-	-
State 1,3,4 -vs- State 1,3,5	SK1G00040395	2	4.98542e-10	3.96139e-08	--	XP_015620496.1 uncharacterized protein LOC4327625 [Oryza sativa Japonica Group]	-	-	-	-	GO:0016020//membrane	-	-
State 1,3,4 -vs- State 1,3,5	SK1G00040408	2	1.52471e-16	2.45137e-14	SBT3.5	EEC71630.1 hypothetical protein OsI_04057 [Oryza sativa Indica Group]	-	-	-	-	-	GO:0008233//peptidase activity;GO:0008236//serine-type peptidase activity	GO:0006508//proteolysis;GO:0009306//protein secretion
State 1,3,4 -vs- State 1,3,5	SK1G00040418	2	5.7135e-14	7.33136e-12	--	XP_015621690.1 uncharacterized protein LOC4324130 isoform X2 [Oryza sativa Japonica Group]	-	-	-	-	-	-	-
State 1,3,4 -vs- State 1,3,5	SK1G00040457	2	9.31127e-09	6.19659e-07	PBP1	EAY76075.1 hypothetical protein OsI_04003 [Oryza sativa Indica Group]	-	-	-	-	-	GO:0005509//calcium ion binding;GO:0005515//protein binding	-
State 1,3,4 -vs- State 1,3,5	SK1G00040461	2	2.84364e-09	2.05976e-07	DGK5	EEE55501.1 hypothetical protein OsJ_03694 [Oryza sativa Japonica Group]	Metabolism;Metabolism;Metabolism;Metabolism;Environmental Information Processing	Global and overview maps;Global and overview maps;Lipid metabolism;Lipid metabolism;Signal transduction	ko01100//Metabolic pathways;ko01110//Biosynthesis of secondary metabolites;ko00564//Glycerophospholipid metabolism;ko00561//Glycerolipid metabolism;ko04070//Phosphatidylinositol signaling system	K00901;K00901;K00901;K00901;K00901	GO:0005575//cellular_component	GO:0001727//lipid kinase activity;GO:0003951//NAD+ kinase activity;GO:0004143//diacylglycerol kinase activity;GO:0016301//kinase activity	GO:0006741//NADP biosynthetic process;GO:0007205//protein kinase C-activating G-protein coupled receptor signaling pathway;GO:0008150//biological_process
State 1,3,4 -vs- State 1,3,5	SK1G00040466	2	7.02195e-23	1.73811e-20	SPHK2	KAB8083787.1 hypothetical protein EE612_006107 [Oryza sativa]	Metabolism;Metabolism	Global and overview maps;Lipid metabolism	ko01100//Metabolic pathways;ko00600//Sphingolipid metabolism	K04718;K04718	GO:0005575//cellular_component	GO:0001727//lipid kinase activity;GO:0016301//kinase activity	GO:0008150//biological_process
State 1,3,4 -vs- State 1,3,5	SK1G00040483	2	2.5088e-11	2.40439e-09	KMS1	XP_015621516.1 vacuole membrane protein KMS1 [Oryza sativa Japonica Group]	-	-	-	-	-	-	-
State 1,3,4 -vs- State 1,3,5	SK1G00040547	2	8.66343e-17	1.42619e-14	LIP1P-1	XP_015616802.1 protein PAT1 homolog 1 isoform X1 [Oryza sativa Japonica Group]	Genetic Information Processing	Folding, sorting and degradation	ko03018//RNA degradation	K12617	-	GO:0003824//catalytic activity;GO:0004076//biotin synthase activity;GO:0051536//iron-sulfur cluster binding;GO:0051537//2 iron, 2 sulfur cluster binding;GO:0051539//4 iron, 4 sulfur cluster binding;GO:0070283//radical SAM enzyme activity	GO:0009102//biotin biosynthetic process;GO:0009107//lipoate biosynthetic process
State 1,3,4 -vs- State 1,3,5	SK1G00040581	3	3.61844e-181	3.1124e-177	GSTF2	XP_015614423.1 probable glutathione S-transferase GSTF2 [Oryza sativa Japonica Group]	Metabolism;Metabolism	Global and overview maps;Metabolism of other amino acids	ko01100//Metabolic pathways;ko00480//Glutathione metabolism	K00799;K00799	-	GO:0005515//protein binding;GO:0016034//maleylacetoacetate isomerase activity;GO:0016614//oxidoreductase activity, acting on CH-OH group of donors	GO:0006559//L-phenylalanine catabolic process;GO:0006572//tyrosine catabolic process;GO:0006749//glutathione metabolic process;GO:0055114//oxidation-reduction process
State 1,3,4 -vs- State 1,3,5	SK1G00040619	2	2.20263e-16	3.47631e-14	CDS1	EEC71512.1 hypothetical protein OsI_03804 [Oryza sativa Indica Group]	Metabolism;Metabolism;Metabolism;Environmental Information Processing	Global and overview maps;Global and overview maps;Lipid metabolism;Signal transduction	ko01100//Metabolic pathways;ko01110//Biosynthesis of secondary metabolites;ko00564//Glycerophospholipid metabolism;ko04070//Phosphatidylinositol signaling system	K00981;K00981;K00981;K00981	-	-	-
State 1,3,4 -vs- State 1,3,5	SK1G00040744	1	1.2941e-10	1.14459e-08	--	EAY75762.1 hypothetical protein OsI_03675 [Oryza sativa Indica Group]	-	-	-	-	GO:0001669//acrosomal vesicle	-	GO:0007340//acrosome reaction;GO:0007342//fusion of sperm to egg plasma membrane
State 1,3,4 -vs- State 1,3,5	SK1G00040818	2	3.64075e-10	2.95433e-08	SBT5.6	XP_015621996.1 subtilisin-like protease SBT5.6 [Oryza sativa Japonica Group]	-	-	-	-	-	GO:0008236//serine-type peptidase activity	GO:0006508//proteolysis;GO:0009306//protein secretion
State 1,3,4 -vs- State 1,3,5	SK1G00040842	5	4.79325e-10	3.81751e-08	RPS24A	XP_015614819.1 40S ribosomal protein S24-1 [Oryza sativa Japonica Group]	Genetic Information Processing	Translation	ko03010//Ribosome	K02974	GO:0005840//ribosome	GO:0003735//structural constituent of ribosome;GO:0005085//guanyl-nucleotide exchange factor activity	GO:0006412//translation
State 1,3,4 -vs- State 1,3,5	SK1G00040868	2	7.35528e-260	1.26533e-255	RZFP34	XP_015611800.1 probable E3 ubiquitin-protein ligase RZFP34 [Oryza sativa Japonica Group]	Genetic Information Processing	Folding, sorting and degradation	ko04120//Ubiquitin mediated proteolysis	K10144	-	GO:0008270//zinc ion binding	GO:0019878//lysine biosynthetic process via aminoadipic acid
State 1,3,4 -vs- State 1,3,5	SK1G00040910	2	4.02521e-63	4.32786e-60	BANGLUC	BAA77784.1 beta-1,3-glucanase [Oryza sativa]	-	-	-	-	-	GO:0004553//hydrolase activity, hydrolyzing O-glycosyl compounds	GO:0005975//carbohydrate metabolic process
State 1,3,4 -vs- State 1,3,5	SK1G00040920	2	9.38078e-11	8.49356e-09	RTE1	EEC71369.1 hypothetical protein OsI_03477 [Oryza sativa Indica Group]	Environmental Information Processing	Signal transduction	ko04016//MAPK signaling pathway - plant	K20726	-	-	-
State 1,3,4 -vs- State 1,3,5	SK1G00041126	5	2.34262e-10	1.98522e-08	Os01g0679700	NP_001147066.1 60S ribosomal protein L37a isoform 2 [Zea mays]	Genetic Information Processing	Translation	ko03010//Ribosome	K02921	GO:0000315//organellar large ribosomal subunit;GO:0005840//ribosome;GO:0022625//cytosolic large ribosomal subunit	GO:0003735//structural constituent of ribosome;GO:0008270//zinc ion binding;GO:0051539//4 iron, 4 sulfur cluster binding;GO:0070283//radical SAM enzyme activity	GO:0006412//translation;GO:0015948//methanogenesis;GO:0035556//intracellular signal transduction;GO:0046500//S-adenosylmethionine metabolic process
State 1,3,4 -vs- State 1,3,5	SK1G00041130	2	1.44272e-34	6.89419e-32	--	EAY75369.1 hypothetical protein OsI_03265 [Oryza sativa Indica Group]	-	-	-	-	GO:0005576//extracellular region;GO:0005666//DNA-directed RNA polymerase III complex;GO:0016021//integral component of membrane	GO:0003677//DNA binding;GO:0005219//ryanodine-sensitive calcium-release channel activity;GO:0008200//ion channel inhibitor activity;GO:0046872//metal ion binding	GO:0006270//DNA replication initiation;GO:0006383//transcription from RNA polymerase III promoter;GO:0006874//cellular calcium ion homeostasis;GO:0009405//pathogenesis
State 1,3,4 -vs- State 1,3,5	SK1G00041177	2	1.42991e-15	2.11148e-13	NAC073	BAD73299.1 fertility restorer B-like [Oryza sativa Japonica Group]	-	-	-	-	GO:0005739//mitochondrion	GO:0003677//DNA binding	GO:0006355//regulation of transcription, DNA-templated
State 1,3,4 -vs- State 1,3,5	SK1G00041276	3	1.08887e-11	1.10839e-09	CICDH	XP_015612407.1 cytosolic isocitrate dehydrogenase [NADP] [Oryza sativa Japonica Group]	Metabolism;Metabolism;Metabolism;Metabolism;Metabolism;Cellular Processes;Metabolism;Metabolism	Global and overview maps;Global and overview maps;Global and overview maps;Global and overview maps;Metabolism of other amino acids;Transport and catabolism;Carbohydrate metabolism;Global and overview maps	ko01100//Metabolic pathways;ko01110//Biosynthesis of secondary metabolites;ko01200//Carbon metabolism;ko01230//Biosynthesis of amino acids;ko00480//Glutathione metabolism;ko04146//Peroxisome;ko00020//Citrate cycle (TCA cycle);ko01210//2-Oxocarboxylic acid metabolism	K00031;K00031;K00031;K00031;K00031;K00031;K00031;K00031	GO:0005962//mitochondrial isocitrate dehydrogenase complex (NAD+);GO:0045243//cytosolic isocitrate dehydrogenase complex (NAD+)	GO:0003862//3-isopropylmalate dehydrogenase activity;GO:0004449//isocitrate dehydrogenase (NAD+) activity;GO:0004450//isocitrate dehydrogenase (NADP+) activity;GO:0016616//oxidoreductase activity, acting on the CH-OH group of donors, NAD or NADP as acceptor	GO:0006099//tricarboxylic acid cycle;GO:0006102//isocitrate metabolic process;GO:0009098//leucine biosynthetic process;GO:0055114//oxidation-reduction process
State 1,3,4 -vs- State 1,3,5	SK1G00041297	2	3.41352e-23	8.57268e-21	Os01g0652300	XP_015618497.1 phospholipase A1-II 4-like [Oryza sativa Japonica Group]	-	-	-	-	-	GO:0016787//hydrolase activity;GO:0016788//hydrolase activity, acting on ester bonds	GO:0006629//lipid metabolic process;GO:0009058//biosynthetic process
State 1,3,4 -vs- State 1,3,5	SK1G00041348	2	1.56551e-09	1.17042e-07	IMCEL2	EEE55068.1 hypothetical protein OsJ_02788 [Oryza sativa Japonica Group]	Metabolism;Metabolism;Metabolism	Global and overview maps;Global and overview maps;Metabolism of terpenoids and polyketides	ko01100//Metabolic pathways;ko01110//Biosynthesis of secondary metabolites;ko00900//Terpenoid backbone biosynthesis	K15889;K15889;K15889	GO:0005576//extracellular region	GO:0008236//serine-type peptidase activity;GO:0016787//hydrolase activity	GO:0006508//proteolysis
State 1,3,4 -vs- State 1,3,5	SK1G00041359	1	2.04955e-18	3.9176e-16	--	XP_015617246.1 carbonic anhydrase, chloroplastic isoform X3 [Oryza sativa Japonica Group]	Metabolism;Metabolism	Global and overview maps;Energy metabolism	ko01100//Metabolic pathways;ko00910//Nitrogen metabolism	K01673;K01673	-	-	-
State 1,3,4 -vs- State 1,3,5	SK1G00041374	2	6.57775e-14	8.28989e-12	At1g48100	XP_015611103.1 polygalacturonase At1g48100 isoform X1 [Oryza sativa Japonica Group]	-	-	-	-	-	GO:0004650//polygalacturonase activity	GO:0005975//carbohydrate metabolic process;GO:0051186//cofactor metabolic process;GO:0071941//nitrogen cycle metabolic process
State 1,3,4 -vs- State 1,3,5	SK1G00041438	2	1.52065e-21	3.6587e-19	Os01g0624000	EEE55011.1 hypothetical protein OsJ_02661 [Oryza sativa Japonica Group]	Metabolism;Metabolism	Global and overview maps;Lipid metabolism	ko01100//Metabolic pathways;ko00600//Sphingolipid metabolism	K12349;K12349	-	-	-
State 1,3,4 -vs- State 1,3,5	SK1G00041523	2	9.37458e-27	2.90578e-24	--	XP_015622421.1 uncharacterized protein LOC4325311 [Oryza sativa Japonica Group]	-	-	-	-	-	-	-
State 1,3,4 -vs- State 1,3,5	SK1G00041543	2	1.12435e-11	1.13777e-09	BAT1	XP_015622189.1 amino-acid permease BAT1 homolog isoform X2 [Oryza sativa Japonica Group]	-	-	-	-	GO:0005887//integral component of plasma membrane;GO:0016020//membrane	GO:0005275//amine transmembrane transporter activity;GO:0022857//transmembrane transporter activity	GO:0015837//amine transport;GO:0055085//transmembrane transport
State 1,3,4 -vs- State 1,3,5	SK1G00041544	2	8.89672e-14	1.10906e-11	BAT1	XP_015622188.1 amino-acid permease BAT1 homolog isoform X1 [Oryza sativa Japonica Group]	-	-	-	-	GO:0016020//membrane;GO:0016021//integral component of membrane	GO:0015171//amino acid transmembrane transporter activity;GO:0022857//transmembrane transporter activity	GO:0006865//amino acid transport;GO:0055085//transmembrane transport
State 1,3,4 -vs- State 1,3,5	SK1G00041715	2	2.18675e-20	4.88553e-18	CBL9	XP_015622218.1 calcineurin B-like protein 9 [Oryza sativa Japonica Group]	-	-	-	-	-	GO:0005509//calcium ion binding;GO:0005515//protein binding	-
State 1,3,4 -vs- State 1,3,5	SK1G00041761	2	6.37832e-14	8.06811e-12	--	EAY74613.1 hypothetical protein OsI_02501 [Oryza sativa Indica Group]	-	-	-	-	-	-	-
State 1,3,4 -vs- State 1,3,5	SK1G00041806	5	5.23298e-12	5.59149e-10	--	-	-	-	-	-	-	-	-
State 1,3,4 -vs- State 1,3,5	SK1G00041908	2	1.04205e-26	3.17281e-24	SWEET2A	XP_015615030.1 bidirectional sugar transporter SWEET2a [Oryza sativa Japonica Group]	-	-	-	-	GO:0016021//integral component of membrane	-	-
State 1,3,4 -vs- State 1,3,5	SK1G00041956	3	1.07222e-08	7.09437e-07	CCR1	EAY74373.1 hypothetical protein OsI_02260 [Oryza sativa Indica Group]	-	-	-	-	-	GO:0003824//catalytic activity;GO:0003854//3-beta-hydroxy-delta5-steroid dehydrogenase activity;GO:0003978//UDP-glucose 4-epimerase activity;GO:0004043//L-aminoadipate-semialdehyde dehydrogenase activity;GO:0008712//ADP-glyceromanno-heptose 6-epimerase activity;GO:0016616//oxidoreductase activity, acting on the CH-OH group of donors, NAD or NADP as acceptor;GO:0016655//oxidoreductase activity, ac…	GO:0005975//carbohydrate metabolic process;GO:0006012//galactose metabolic process;GO:0006694//steroid biosynthetic process;GO:0008152//metabolic process;GO:0009243//O antigen biosynthetic process;GO:0009244//lipopolysaccharide core region biosynthetic process;GO:0019878//lysine biosynthetic process via aminoadipic acid;GO:0055114//oxidation-reduction process
State 1,3,4 -vs- State 1,3,5	SK1G00042250	3	1.06763e-14	1.46347e-12	GST4	XP_015622486.1 glutathione S-transferase 4 [Oryza sativa Japonica Group]	Metabolism;Metabolism	Global and overview maps;Metabolism of other amino acids	ko01100//Metabolic pathways;ko00480//Glutathione metabolism	K00799;K00799	-	GO:0005515//protein binding;GO:0016034//maleylacetoacetate isomerase activity	GO:0006559//L-phenylalanine catabolic process;GO:0006572//tyrosine catabolic process;GO:0006749//glutathione metabolic process
State 1,3,4 -vs- State 1,3,5	SK1G00042367	1	1.63862e-300	5.63783e-296	SALT	A2WPN7.2 RecName: Full=Salt stress-induced protein; Short=Salt protein; AltName: Full=Protein lectin-like; AltName: Full=Protein mannose-binding lectin [Oryza sativa Indica Group]	-	-	-	-	-	-	-
State 1,3,4 -vs- State 1,3,5	SK1G00042477	5	3.50035e-09	2.49344e-07	RPS27AA	XP_006644130.1 PREDICTED: ubiquitin-40S ribosomal protein S27a-1 [Oryza brachyantha]	Genetic Information Processing	Translation	ko03010//Ribosome	K02977	GO:0005840//ribosome	GO:0003735//structural constituent of ribosome;GO:0005515//protein binding	GO:0006289//nucleotide-excision repair;GO:0006412//translation
State 1,3,4 -vs- State 1,3,5	SK1G00042498	3	8.83166e-23	2.17044e-20	SAM2	XP_015613529.1 S-adenosylmethionine synthase 2 [Oryza sativa Japonica Group]	Metabolism;Metabolism;Metabolism;Metabolism	Global and overview maps;Global and overview maps;Global and overview maps;Amino acid metabolism	ko01100//Metabolic pathways;ko01110//Biosynthesis of secondary metabolites;ko01230//Biosynthesis of amino acids;ko00270//Cysteine and methionine metabolism	K00789;K00789;K00789;K00789	-	GO:0004478//methionine adenosyltransferase activity	GO:0006556//S-adenosylmethionine biosynthetic process;GO:0007155//cell adhesion
State 1,3,4 -vs- State 1,3,5	SK1G00042556	2	8.24192e-15	1.13884e-12	PLDZETA1	EEC70501.1 hypothetical protein OsI_01583 [Oryza sativa Indica Group]	Metabolism;Metabolism;Cellular Processes;Metabolism;Metabolism	Global and overview maps;Global and overview maps;Transport and catabolism;Lipid metabolism;Lipid metabolism	ko01100//Metabolic pathways;ko01110//Biosynthesis of secondary metabolites;ko04144//Endocytosis;ko00564//Glycerophospholipid metabolism;ko00565//Ether lipid metabolism	K01115;K01115;K01115;K01115;K01115	-	GO:0003824//catalytic activity;GO:0008808//cardiolipin synthase activity;GO:0035091//phosphatidylinositol binding	GO:0032049//cardiolipin biosynthetic process
State 1,3,4 -vs- State 1,3,5	SK1G00042570	2	2.56692e-16	4.01443e-14	--	XP_015622162.1 uncharacterized protein LOC4327756 isoform X1 [Oryza sativa Japonica Group]	-	-	-	-	-	-	-
State 1,3,4 -vs- State 1,3,5	SK1G00042649	2	2.91385e-53	2.50635e-50	CIPK1	XP_015622076.1 CBL-interacting protein kinase 1 [Oryza sativa Japonica Group]	-	-	-	-	-	GO:0004672//protein kinase activity;GO:0005524//ATP binding;GO:0016709//oxidoreductase activity, acting on paired donors, with incorporation or reduction of molecular oxygen, NAD(P)H as one donor, and incorporation of one atom of oxygen	GO:0006468//protein phosphorylation;GO:0006744//ubiquinone biosynthetic process;GO:0007165//signal transduction
State 1,3,4 -vs- State 1,3,5	SK1G00042652	3	1.94084e-12	2.16807e-10	AT4	XP_015621300.1 acyl transferase 4 [Oryza sativa Japonica Group]	-	-	-	-	-	GO:0016747//transferase activity, transferring acyl groups other than amino-acyl groups	-
State 1,3,4 -vs- State 1,3,5	SK1G00042684	3	6.76197e-25	1.84645e-22	GER4	XP_015622834.1 germin-like protein 1-1 [Oryza sativa Japonica Group]	-	-	-	-	-	-	-
State 1,3,4 -vs- State 1,3,5	SK1G00042803	3	1.42741e-12	1.64804e-10	PRXIIF	EAZ11353.1 hypothetical protein OsJ_01220 [Oryza sativa Japonica Group]	-	-	-	-	-	GO:0003824//catalytic activity;GO:0016209//antioxidant activity;GO:0016491//oxidoreductase activity	GO:0009058//biosynthetic process;GO:0055114//oxidation-reduction process
State 1,3,4 -vs- State 1,3,5	SK1G00042830	3	5.3192e-82	9.15063e-79	PER72	EAY73397.1 hypothetical protein OsI_01277 [Oryza sativa Indica Group]	Metabolism;Metabolism;Metabolism	Global and overview maps;Global and overview maps;Biosynthesis of other secondary metabolites	ko01100//Metabolic pathways;ko01110//Biosynthesis of secondary metabolites;ko00940//Phenylpropanoid biosynthesis	K00430;K00430;K00430	-	GO:0004601//peroxidase activity;GO:0020037//heme binding	GO:0006979//response to oxidative stress;GO:0055114//oxidation-reduction process
State 1,3,4 -vs- State 1,3,5	SK1G00042832	3	2.64196e-10	2.22247e-08	PER9	XP_015633099.1 peroxidase 9 [Oryza sativa Japonica Group]	Metabolism;Metabolism;Metabolism	Global and overview maps;Global and overview maps;Biosynthesis of other secondary metabolites	ko01100//Metabolic pathways;ko01110//Biosynthesis of secondary metabolites;ko00940//Phenylpropanoid biosynthesis	K00430;K00430;K00430	-	GO:0004601//peroxidase activity;GO:0005515//protein binding;GO:0020037//heme binding	GO:0006979//response to oxidative stress;GO:0055114//oxidation-reduction process
State 1,3,4 -vs- State 1,3,5	SK1G00042911	2	7.06674e-12	7.41275e-10	EXPA8	TXG63167.1 hypothetical protein EZV62_010161 [Acer yangbiense]	-	-	-	-	-	-	-
State 1,3,4 -vs- State 1,3,5	SK1G00043013	2	1.35945e-14	1.84874e-12	OsI_001009	XP_015621495.1 salt stress root protein RS1 [Oryza sativa Japonica Group]	-	-	-	-	GO:0046658//anchored component of plasma membrane	-	-
State 1,3,4 -vs- State 1,3,5	SK1G00043020	3	1.12233e-08	7.36922e-07	TIP4-3	XP_004967392.2 uncharacterized protein LOC101763394 [Setaria italica]	-	-	-	-	GO:0016020//membrane	GO:0015267//channel activity	GO:0055085//transmembrane transport
State 1,3,4 -vs- State 1,3,5	SK1G00043023	3	3.74825e-15	5.30708e-13	--	XP_015619255.1 activating signal cointegrator 1 complex subunit 1 [Oryza sativa Japonica Group]	-	-	-	-	-	-	-
State 1,3,4 -vs- State 1,3,5	SK1G00043058	2	2.22442e-47	1.70074e-44	NYC1	EEC70221.1 hypothetical protein OsI_00981 [Oryza sativa Indica Group]	Metabolism;Metabolism;Metabolism	Global and overview maps;Global and overview maps;Metabolism of cofactors and vitamins	ko01100//Metabolic pathways;ko01110//Biosynthesis of secondary metabolites;ko00860//Porphyrin and chlorophyll metabolism	K13606;K13606;K13606	-	GO:0004316//3-oxoacyl-[acyl-carrier-protein] reductase (NADPH) activity;GO:0004757//sepiapterin reductase activity;GO:0008666//2,3,4,5-tetrahydropyridine-2,6-dicarboxylate N-succinyltransferase activity;GO:0008667//2,3-dihydro-2,3-dihydroxybenzoate dehydrogenase activity;GO:0008678//2-deoxy-D-gluconate 3-dehydrogenase activity;GO:0016491//oxidoreductase activity;GO:0016872//intramolecular lyase a…	GO:0000272//polysaccharide catabolic process;GO:0006633//fatty acid biosynthetic process;GO:0006729//tetrahydrobiopterin biosynthetic process;GO:0055114//oxidation-reduction process
State 1,3,4 -vs- State 1,3,5	SK1G00043065	5	2.60175e-11	2.48018e-09	RTNLB1	EAY73097.1 hypothetical protein OsI_00974 [Oryza sativa Indica Group]	-	-	-	-	-	-	-
State 1,3,4 -vs- State 1,3,5	SK1G00043184	2	1.28568e-08	8.34628e-07	MT3A	A1YTM8.1 RecName: Full=Metallothionein-like protein 3A; AltName: Full=Class I metallothionein-like protein 3A; AltName: Full=OsMT-I-3a; Short=OsMT3; Short=OsMT3a [Oryza sativa Japonica Group]	-	-	-	-	-	GO:0046872//metal ion binding	-
State 1,3,4 -vs- State 1,3,5	SK1G00043373	2	4.00392e-12	4.33204e-10	RHG1A	XP_015620967.1 E3 ubiquitin-protein ligase MBR1 [Oryza sativa Japonica Group]	-	-	-	-	GO:0000109//nucleotide-excision repair complex;GO:0005680//anaphase-promoting complex	GO:0008270//zinc ion binding;GO:0046872//metal ion binding;GO:0061630//ubiquitin protein ligase activity;GO:0097602//cullin family protein binding	GO:0006289//nucleotide-excision repair;GO:0031145//anaphase-promoting complex-dependent proteasomal ubiquitin-dependent protein catabolic process
State 1,3,4 -vs- State 1,3,5	SK1G00043423	2	6.2353e-14	7.9163e-12	NET4A	EAY72689.1 hypothetical protein OsI_00556 [Oryza sativa Indica Group]	-	-	-	-	GO:0005577//fibrinogen complex;GO:0005940//septin ring;GO:0016021//integral component of membrane;GO:0019028//viral capsid;GO:0019031//viral envelope;GO:0031514//motile cilium	GO:0003779//actin binding;GO:0005102//receptor binding;GO:0005198//structural molecule activity;GO:0005524//ATP binding;GO:0008134//transcription factor binding;GO:0042803//protein homodimerization activity;GO:0070840//dynein complex binding	GO:0000921//septin ring assembly;GO:0006606//protein import into nucleus;GO:0007030//Golgi organization;GO:0007059//chromosome segregation;GO:0030168//platelet activation;GO:0030261//chromosome condensation;GO:0048870//cell motility;GO:0051258//protein polymerization
State 1,3,4 -vs- State 1,3,5	SK1G00043529	2	1.61177e-19	3.40212e-17	NPF8.1	BAG91734.1 unnamed protein product, partial [Oryza sativa Japonica Group]	-	-	-	-	GO:0016020//membrane	GO:0015333//peptide:proton symporter activity;GO:0022857//transmembrane transporter activity	GO:0015833//peptide transport;GO:0055085//transmembrane transport
State 1,3,4 -vs- State 1,3,5	SK1G00043587	3	2.58022e-09	1.88083e-07	--	EAY72562.1 hypothetical protein OsI_00428 [Oryza sativa Indica Group]	-	-	-	-	-	-	-
State 1,3,4 -vs- State 1,3,5	SK1G00043640	2	2.38945e-21	5.66976e-19	--	BAS70136.1 Os01g0121500, partial [Oryza sativa Japonica Group]	-	-	-	-	-	-	-
State 1,3,4 -vs- State 1,3,5	SK1G00043682	2	9.32288e-18	1.71531e-15	ENDO4	XP_015614478.1 endonuclease 2 [Oryza sativa Japonica Group]	-	-	-	-	-	GO:0003676//nucleic acid binding;GO:0004519//endonuclease activity	GO:0006308//DNA catabolic process
State 1,3,4 -vs- State 1,3,5	SK1G00043693	2	1.14675e-19	2.4355e-17	XYL1	XP_015622373.1 alpha-xylosidase 1 [Oryza sativa Japonica Group]	-	-	-	-	-	GO:0004553//hydrolase activity, hydrolyzing O-glycosyl compounds	GO:0005975//carbohydrate metabolic process
State 1,3,4 -vs- State 1,3,5	SK1G00043699	4	1.46093e-44	1.0053e-41	WIP1	XP_015622812.1 Bowman-Birk type wound-induced proteinase inhibitor WIP1 [Oryza sativa Japonica Group]	-	-	-	-	GO:0005576//extracellular region	GO:0004867//serine-type endopeptidase inhibitor activity	-
State 1,3,4 -vs- State 1,3,5	SK1G00043759	3	5.34763e-11	4.98619e-09	IRL	XP_015621646.1 isoflavone reductase homolog IRL [Oryza sativa Japonica Group]	-	-	-	-	-	GO:0003824//catalytic activity;GO:0003854//3-beta-hydroxy-delta5-steroid dehydrogenase activity;GO:0003978//UDP-glucose 4-epimerase activity;GO:0008460//dTDP-glucose 4,6-dehydratase activity;GO:0016616//oxidoreductase activity, acting on the CH-OH group of donors, NAD or NADP as acceptor;GO:0016757//transferase activity, transferring glycosyl groups;GO:0051287//NAD binding	GO:0005975//carbohydrate metabolic process;GO:0006012//galactose metabolic process;GO:0006694//steroid biosynthetic process;GO:0006813//potassium ion transport;GO:0009243//O antigen biosynthetic process;GO:0019305//dTDP-rhamnose biosynthetic process;GO:0055114//oxidation-reduction process
State 1,3,4 -vs- State 1,3,5	SK1G00068536	1	1.70528e-09	1.26176e-07	LTP2-A	XP_015615471.1 non-specific lipid-transfer protein 2A [Oryza sativa Japonica Group]	-	-	-	-	-	-	-
State 1,3,4 -vs- State 1,3,5	SK1G00068591	3	6.45078e-09	4.39496e-07	GSVIVT00023967001	KAF3327390.1 Peroxidase 68 [Carex littledalei]	Metabolism;Metabolism;Metabolism	Global and overview maps;Global and overview maps;Biosynthesis of other secondary metabolites	ko01100//Metabolic pathways;ko01110//Biosynthesis of secondary metabolites;ko00940//Phenylpropanoid biosynthesis	K00430;K00430;K00430	-	GO:0004601//peroxidase activity;GO:0020037//heme binding;GO:0051015//actin filament binding	GO:0006979//response to oxidative stress;GO:0007155//cell adhesion;GO:0055114//oxidation-reduction process
State 1,3,4 -vs- State 1,3,5	SK1G00068596	2	5.33637e-21	1.23224e-18	--	EAY79687.1 hypothetical protein OsI_34834 [Oryza sativa Indica Group]	-	-	-	-	-	-	-
State 1,3,4 -vs- State 1,3,5	SK1G00068757	2	1.07546e-09	8.1683e-08	ASD1	KAB8114097.1 hypothetical protein EE612_053330 [Oryza sativa]	Metabolism;Metabolism	Global and overview maps;Carbohydrate metabolism	ko01100//Metabolic pathways;ko00520//Amino sugar and nucleotide sugar metabolism	K01209;K01209	-	GO:0046556//alpha-L-arabinofuranosidase activity	GO:0046373//L-arabinose metabolic process
State 1,3,4 -vs- State 1,3,5	SK1G00068762	2	1.95598e-23	4.94834e-21	ASD1	KAF0907281.1 hypothetical protein E2562_015782 [Oryza meyeriana var. granulata] [Oryza meyeriana]	Metabolism;Metabolism	Global and overview maps;Carbohydrate metabolism	ko01100//Metabolic pathways;ko00520//Amino sugar and nucleotide sugar metabolism	K01209;K01209	-	GO:0016798//hydrolase activity, acting on glycosyl bonds;GO:0046556//alpha-L-arabinofuranosidase activity	GO:0046373//L-arabinose metabolic process
State 1,3,4 -vs- State 1,3,5	SK1G00068791	5	1.30551e-12	1.51748e-10	RPS16A	XP_015617880.1 40S ribosomal protein S16-like [Oryza sativa Japonica Group]	Genetic Information Processing	Translation	ko03010//Ribosome	K02960	GO:0005840//ribosome;GO:0022627//cytosolic small ribosomal subunit	GO:0003735//structural constituent of ribosome	GO:0006412//translation
State 1,3,4 -vs- State 1,3,5	SK1G00068858	3	9.17383e-10	7.07701e-08	ACR12	XP_015619723.1 ACT domain-containing protein ACR12 [Oryza sativa Japonica Group]	-	-	-	-	-	GO:0008773//[protein-PII] uridylyltransferase activity	GO:0018177//protein uridylylation
State 1,3,4 -vs- State 1,3,5	SK1G00069517	2	3.39817e-49	2.71901e-46	ABCG11	KAB8117318.1 hypothetical protein EE612_059161 [Oryza sativa]	-	-	-	-	GO:0005575//cellular_component;GO:0005887//integral component of plasma membrane;GO:0009380//excinuclease repair complex;GO:0009898//cytoplasmic side of plasma membrane;GO:0016020//membrane;GO:0016021//integral component of membrane;GO:0043190//ATP-binding cassette (ABC) transporter complex;GO:0055051//ATP-binding cassette (ABC) transporter complex, integrated substrate binding;GO:0055052//ATP-bi…	GO:0003674//molecular_function;GO:0003723//RNA binding;GO:0003724//RNA helicase activity;GO:0003924//GTPase activity;GO:0004127//cytidylate kinase activity;GO:0005198//structural molecule activity;GO:0005260//channel-conductance-controlling ATPase activity;GO:0005319//lipid transporter activity;GO:0005524//ATP binding;GO:0005525//GTP binding;GO:0008565//protein transporter activity;GO:0009381//ex…	GO:0000910//cytokinesis;GO:0006139//nucleobase-containing compound metabolic process;GO:0006289//nucleotide-excision repair;GO:0006777//Mo-molybdopterin cofactor biosynthetic process;GO:0006810//transport;GO:0006817//phosphate ion transport;GO:0006824//cobalt ion transport;GO:0006855//drug transmembrane transport;GO:0006869//lipid transport;GO:0007601//visual perception;GO:0008150//biological_pro…
State 1,3,4 -vs- State 1,3,5	SK1G00069560	2	4.19415e-32	1.67795e-29	Os12g0429200	XP_015620214.1 beta-galactosidase 15 [Oryza sativa Japonica Group]	-	-	-	-	-	GO:0030246//carbohydrate binding	-
State 1,3,4 -vs- State 1,3,5	SK1G00069583	3	3.25785e-09	2.32551e-07	HIPP39	EAY82913.1 hypothetical protein OsI_38128 [Oryza sativa Indica Group]	-	-	-	-	-	GO:0046872//metal ion binding	-
State 1,3,4 -vs- State 1,3,5	SK1G00069645	2	1.70657e-25	4.73518e-23	--	XP_015618742.1 uncharacterized protein LOC9272205 [Oryza sativa Japonica Group]	-	-	-	-	-	-	-
State 1,3,4 -vs- State 1,3,5	SK1G00069666	2	4.76077e-17	8.18995e-15	Os12g0429200	EAY82934.1 hypothetical protein OsI_38151 [Oryza sativa Indica Group]	-	-	-	-	GO:0009341//beta-galactosidase complex	GO:0004565//beta-galactosidase activity	GO:0005975//carbohydrate metabolic process
State 1,3,4 -vs- State 1,3,5	SK1G00069864	3	6.88318e-10	5.41567e-08	UPS2	EEC69332.1 hypothetical protein OsI_38434 [Oryza sativa Indica Group]	-	-	-	-	GO:0016021//integral component of membrane	GO:0015144//carbohydrate transmembrane transporter activity	GO:0034219//carbohydrate transmembrane transport;GO:0071705//nitrogen compound transport
State 1,3,4 -vs- State 1,3,5	SK1G00069865	2	3.36817e-55	3.13203e-52	UPS2	XP_015619370.1 ureide permease 2 isoform X1 [Oryza sativa Japonica Group]	-	-	-	-	GO:0016021//integral component of membrane	GO:0015144//carbohydrate transmembrane transporter activity	GO:0034219//carbohydrate transmembrane transport;GO:0071705//nitrogen compound transport
State 1,3,4 -vs- State 1,3,5	SK1G00070130	2	4.72446e-10	3.77146e-08	--	EAZ20848.1 hypothetical protein OsJ_36485 [Oryza sativa Japonica Group]	-	-	-	-	-	-	-
State 1,3,4 -vs- State 1,3,5	SK1G00070177	4	4.21662e-12	4.53366e-10	--	TVU18501.1 hypothetical protein EJB05_34604, partial [Eragrostis curvula]	-	-	-	-	-	GO:0004867//serine-type endopeptidase inhibitor activity	GO:0006915//apoptotic process;GO:0007050//cell cycle arrest;GO:0008285//negative regulation of cell proliferation;GO:0009611//response to wounding
State 1,3,4 -vs- State 1,3,5	SK1G00070230	3	2.19776e-34	1.03584e-31	MT4A	Q0IMG5.1 RecName: Full=Metallothionein-like protein 4A; AltName: Full=Class I metallothionein-like protein 4A; AltName: Full=OsMT-I-4a; AltName: Full=OsMT1b [Oryza sativa Japonica Group]	-	-	-	-	-	GO:0008270//zinc ion binding;GO:0046872//metal ion binding	-
State 1,3,4 -vs- State 1,3,5	SK1G00070247	5	3.22228e-19	6.59916e-17	RPL8	XP_015619844.1 60S ribosomal protein L8 [Oryza sativa Japonica Group]	Genetic Information Processing	Translation	ko03010//Ribosome	K02938	GO:0000315//organellar large ribosomal subunit;GO:0005840//ribosome;GO:0022625//cytosolic large ribosomal subunit	GO:0003735//structural constituent of ribosome	GO:0006412//translation
State 1,3,4 -vs- State 1,3,5	SK1G00070260	3	3.06612e-21	7.22554e-19	BOR1	XP_015620545.1 boron transporter 1 [Oryza sativa Japonica Group]	-	-	-	-	GO:0016021//integral component of membrane	-	GO:0006820//anion transport
State 1,3,4 -vs- State 1,3,5	SK1G00070271	1	1.54418e-08	9.91216e-07	--	XP_015618615.1 uncharacterized protein LOC4352535 [Oryza sativa Japonica Group]	-	-	-	-	-	-	-
State 1,3,4 -vs- State 1,3,5	SK1G00070457	2	5.30922e-12	5.65539e-10	WAKL14	XP_015619814.1 wall-associated receptor kinase-like 14 isoform X1 [Oryza sativa Japonica Group]	-	-	-	-	-	GO:0004672//protein kinase activity;GO:0005524//ATP binding	GO:0006468//protein phosphorylation
State 1,3,4 -vs- State 1,3,5	SK1G00070589	4	6.76822e-09	4.60212e-07	YAB6	XP_015618575.1 protein YABBY 6 [Oryza sativa Japonica Group]	-	-	-	-	-	-	GO:0007275//multicellular organism development
State 1,3,4 -vs- State 1,3,5	SK1G00070601	3	1.66239e-44	1.12149e-41	Os12g0624000	ABG22095.1 5-methyltetrahydropteroyltriglutamate-homocysteine methyltransferase, putative, expressed [Oryza sativa Japonica Group]	Metabolism;Metabolism;Metabolism;Metabolism;Metabolism	Global and overview maps;Global and overview maps;Global and overview maps;Amino acid metabolism;Metabolism of other amino acids	ko01100//Metabolic pathways;ko01110//Biosynthesis of secondary metabolites;ko01230//Biosynthesis of amino acids;ko00270//Cysteine and methionine metabolism;ko00450//Selenocompound metabolism	K00549;K00549;K00549;K00549;K00549	-	GO:0003871//5-methyltetrahydropteroyltriglutamate-homocysteine S-methyltransferase activity;GO:0004357//glutamate-cysteine ligase activity;GO:0008270//zinc ion binding	GO:0006750//glutathione biosynthetic process;GO:0008652//cellular amino acid biosynthetic process;GO:0009086//methionine biosynthetic process
State 1,3,4 -vs- State 1,3,5	SK1G00070646	5	2.76043e-09	2.0037e-07	RBG7	AAB65412.1 glycine-rich protein [Oryza sativa Indica Group]	-	-	-	-	-	GO:0003676//nucleic acid binding	GO:0008380//RNA splicing
State 1,3,4 -vs- State 1,3,5	SK1G00070821	2	1.68832e-11	1.67401e-09	At4g12490	XP_015613385.1 cortical cell-delineating protein [Oryza sativa Japonica Group]	-	-	-	-	-	-	-
State 1,3,4 -vs- State 1,3,5	SK1G00070846	2	3.73026e-111	9.87257e-108	EXPB6	XP_015614019.1 expansin-B6 [Oryza sativa Japonica Group]	-	-	-	-	-	-	-
State 1,3,4 -vs- State 1,3,5	SK1G00070847	2	4.95467e-116	1.42059e-112	EXPB2	XP_015614021.1 expansin-B2 [Oryza sativa Japonica Group]	-	-	-	-	-	-	-
State 1,3,4 -vs- State 1,3,5	SK1G00070848	2	5.10765e-52	4.28619e-49	EXPB3	XP_015612911.1 expansin-B3 [Oryza sativa Japonica Group]	-	-	-	-	-	-	-
State 1,3,4 -vs- State 1,3,5	SK1G00070868	1	3.68841e-10	2.98048e-08	VAB	XP_015614436.1 VAN3-binding protein [Oryza sativa Japonica Group]	-	-	-	-	-	-	-
State 1,3,4 -vs- State 1,3,5	SK1G00070894	2	1.58678e-30	5.99941e-28	ppt-1	XP_015614869.1 palmitoyl-protein thioesterase 1 [Oryza sativa Japonica Group]	Metabolism;Metabolism;Metabolism	Global and overview maps;Global and overview maps;Lipid metabolism	ko01100//Metabolic pathways;ko01212//Fatty acid metabolism;ko00062//Fatty acid elongation	K01074;K01074;K01074	-	-	-
State 1,3,4 -vs- State 1,3,5	SK1G00070949	3	2.03646e-30	7.61593e-28	GSTU6	XP_003574241.2 uncharacterized protein LOC100844487 [Brachypodium distachyon]	Metabolism;Metabolism	Global and overview maps;Metabolism of other amino acids	ko01100//Metabolic pathways;ko00480//Glutathione metabolism	K00799;K00799	-	GO:0005515//protein binding;GO:0015035//protein disulfide oxidoreductase activity;GO:0016034//maleylacetoacetate isomerase activity	GO:0006559//L-phenylalanine catabolic process;GO:0006572//tyrosine catabolic process;GO:0006749//glutathione metabolic process;GO:0006790//sulfur compound metabolic process;GO:0042965//glutaredoxin biosynthetic process;GO:0045454//cell redox homeostasis;GO:0055114//oxidation-reduction process
State 1,3,4 -vs- State 1,3,5	SK1G00070995	2	1.77105e-11	1.741e-09	--	XP_015614454.1 uncharacterized protein LOC9269470 [Oryza sativa Japonica Group]	-	-	-	-	-	-	-
State 1,3,4 -vs- State 1,3,5	SK1G00071166	3	4.7342e-46	3.39344e-43	GSTU6	XP_015613723.1 uncharacterized protein LOC4349190 [Oryza sativa Japonica Group]	Metabolism;Metabolism	Global and overview maps;Metabolism of other amino acids	ko01100//Metabolic pathways;ko00480//Glutathione metabolism	K00799;K00799	-	GO:0005515//protein binding;GO:0016034//maleylacetoacetate isomerase activity	GO:0006559//L-phenylalanine catabolic process;GO:0006572//tyrosine catabolic process;GO:0006749//glutathione metabolic process
State 1,3,4 -vs- State 1,3,5	SK1G00071306	2	1.07334e-71	1.3189e-68	PMEI7	EAY79161.1 hypothetical protein OsI_34268 [Oryza sativa Indica Group]	-	-	-	-	-	GO:0004857//enzyme inhibitor activity	-
State 1,3,4 -vs- State 1,3,5	SK1G00071313	2	2.60229e-11	2.48018e-09	--	KAB8113275.1 hypothetical protein EE612_052192 [Oryza sativa]	-	-	-	-	-	-	-
State 1,3,4 -vs- State 1,3,5	SK1G00071400	2	1.87118e-16	2.98054e-14	NAC031	ADE62744.1 NAM-domain transcription factor [Oryza sativa Japonica Group]	-	-	-	-	-	GO:0003677//DNA binding	GO:0006355//regulation of transcription, DNA-templated
State 1,3,4 -vs- State 1,3,5	SK1G00071428	2	2.04803e-11	2.00184e-09	DESI1	EEC67154.1 hypothetical protein OsI_34002 [Oryza sativa Indica Group]	-	-	-	-	-	GO:0008233//peptidase activity	-
State 1,3,4 -vs- State 1,3,5	SK1G00071463	5	1.78009e-13	2.19519e-11	RPL23A	NP_001132424.1 60S ribosomal protein L23-like [Zea mays]	Genetic Information Processing	Translation	ko03010//Ribosome	K02894	GO:0000315//organellar large ribosomal subunit;GO:0005840//ribosome;GO:0022625//cytosolic large ribosomal subunit	GO:0003735//structural constituent of ribosome	GO:0006412//translation
State 1,3,4 -vs- State 1,3,5	SK1G00071471	5	7.29194e-16	1.11012e-13	RPL21E	XP_015614095.1 60S ribosomal protein L21-2 [Oryza sativa Japonica Group]	Genetic Information Processing	Translation	ko03010//Ribosome	K02889	GO:0005840//ribosome	GO:0003735//structural constituent of ribosome;GO:0016740//transferase activity	GO:0006412//translation
State 1,3,4 -vs- State 1,3,5	SK1G00071555	3	3.52902e-09	2.5035e-07	--	-	-	-	-	-	-	-	-
State 1,3,4 -vs- State 1,3,5	SK1G00071594	2	1.62755e-09	1.20685e-07	PHT1-8	XP_015614122.1 probable inorganic phosphate transporter 1-8 [Oryza sativa Japonica Group]	-	-	-	-	GO:0005887//integral component of plasma membrane;GO:0016021//integral component of membrane	GO:0008028//monocarboxylic acid transmembrane transporter activity;GO:0015114//phosphate ion transmembrane transporter activity;GO:0015238//drug transmembrane transporter activity;GO:0015295//solute:proton symporter activity;GO:0022857//transmembrane transporter activity;GO:0042910//xenobiotic transporter activity;GO:0051119//sugar transmembrane transporter activity	GO:0006810//transport;GO:0006817//phosphate ion transport;GO:0008643//carbohydrate transport;GO:0015718//monocarboxylic acid transport;GO:0015893//drug transport;GO:0042908//xenobiotic transport;GO:0055085//transmembrane transport
State 1,3,4 -vs- State 1,3,5	SK1G00071719	1	5.44656e-17	9.14119e-15	--	EAY78491.1 hypothetical protein OsI_33583 [Oryza sativa Indica Group]	-	-	-	-	-	-	GO:0005975//carbohydrate metabolic process
State 1,3,4 -vs- State 1,3,5	SK1G00071747	5	2.10827e-11	2.04907e-09	RPS17C	XP_015614780.1 40S ribosomal protein S17-3 [Oryza sativa Japonica Group]	Genetic Information Processing	Translation	ko03010//Ribosome	K02962	GO:0005840//ribosome;GO:0034464//BBSome	GO:0003735//structural constituent of ribosome	GO:0006412//translation
State 1,3,4 -vs- State 1,3,5	SK1G00071749	5	1.11314e-11	1.12976e-09	RPS28	OEL38380.1 hypothetical protein BAE44_0000602 [Dichanthelium oligosanthes]	Genetic Information Processing	Translation	ko03010//Ribosome	K02979	GO:0005840//ribosome	GO:0003735//structural constituent of ribosome	GO:0006412//translation
State 1,3,4 -vs- State 1,3,5	SK1G00071845	3	1.57701e-11	1.57272e-09	RIPK	KAB8112629.1 hypothetical protein EE612_051219 [Oryza sativa]	-	-	-	-	-	GO:0004672//protein kinase activity;GO:0005524//ATP binding	GO:0006468//protein phosphorylation
State 1,3,4 -vs- State 1,3,5	SK1G00071910	2	1.84589e-35	9.33965e-33	KLLA0C05324g	XP_015614040.1 probable glucan 1,3-beta-glucosidase A [Oryza sativa Japonica Group]	-	-	-	-	-	GO:0004553//hydrolase activity, hydrolyzing O-glycosyl compounds;GO:0030674//protein binding, bridging;GO:0051015//actin filament binding	GO:0071704//organic substance metabolic process
State 1,3,4 -vs- State 1,3,5	SK1G00071939	2	1.0919e-34	5.36684e-32	--	EEC66842.1 hypothetical protein OsI_33315 [Oryza sativa Indica Group]	-	-	-	-	GO:0005576//extracellular region;GO:0031411//gas vesicle	GO:0008289//lipid binding	GO:0006869//lipid transport;GO:0031412//gas vesicle organization
State 1,3,4 -vs- State 1,3,5	SK1G00072290	2	4.17646e-13	5.02431e-11	Os10g0205300	XP_015614636.1 probable glucuronosyltransferase Os10g0205300 [Oryza sativa Japonica Group]	-	-	-	-	GO:0016020//membrane	GO:0015018//galactosylgalactosylxylosylprotein 3-beta-glucuronosyltransferase activity	-
State 1,3,4 -vs- State 1,3,5	SK1G00072332	2	1.82559e-24	4.83163e-22	PMEI10	XP_015613789.1 pectinesterase inhibitor 4 [Oryza sativa Japonica Group]	-	-	-	-	-	GO:0004857//enzyme inhibitor activity	-
State 1,3,4 -vs- State 1,3,5	SK1G00072387	3	7.75748e-09	5.23341e-07	ENO1	EEC66609.1 hypothetical protein OsI_32842 [Oryza sativa Indica Group]	Metabolism;Metabolism;Metabolism;Metabolism;Metabolism;Genetic Information Processing	Global and overview maps;Global and overview maps;Global and overview maps;Global and overview maps;Carbohydrate metabolism;Folding, sorting and degradation	ko01100//Metabolic pathways;ko01110//Biosynthesis of secondary metabolites;ko01200//Carbon metabolism;ko01230//Biosynthesis of amino acids;ko00010//Glycolysis / Gluconeogenesis;ko03018//RNA degradation	K01689;K01689;K01689;K01689;K01689;K01689	-	GO:0004634//phosphopyruvate hydratase activity;GO:0016836//hydro-lyase activity;GO:0050096//methylaspartate ammonia-lyase activity	GO:0006096//glycolytic process;GO:0009234//menaquinone biosynthetic process;GO:0019670//anaerobic glutamate catabolic process
State 1,3,4 -vs- State 1,3,5	SK1G00072401	5	4.91899e-11	4.59899e-09	RPS20A	XP_015614818.1 40S ribosomal protein S20-1 [Oryza sativa Japonica Group]	Genetic Information Processing	Translation	ko03010//Ribosome	K02969	GO:0000314//organellar small ribosomal subunit;GO:0022627//cytosolic small ribosomal subunit	GO:0003735//structural constituent of ribosome	GO:0006412//translation
State 1,3,4 -vs- State 1,3,5	SK1G00072559	3	1.83085e-19	3.79471e-17	--	EAY77736.1 hypothetical protein OsI_32779 [Oryza sativa Indica Group]	-	-	-	-	-	-	-
State 1,3,4 -vs- State 1,3,5	SK1G00072744	2	1.05803e-09	8.05368e-08	HOX15	A2Z4C4.1 RecName: Full=Homeobox-leucine zipper protein HOX15; AltName: Full=HD-ZIP protein HOX15; AltName: Full=Homeodomain transcription factor HOX15; AltName: Full=OsHox15 [Oryza sativa Indica Group]	-	-	-	-	GO:0005615//extracellular space	GO:0003677//DNA binding;GO:0043565//sequence-specific DNA binding	GO:0006260//DNA replication;GO:0006355//regulation of transcription, DNA-templated;GO:0006914//autophagy;GO:0010506//regulation of autophagy
State 1,3,4 -vs- State 1,3,5	SK1G00072829	2	8.34265e-09	5.58438e-07	CBSX1	XP_015612674.1 CBS domain-containing protein CBSX1, chloroplastic [Oryza sativa Japonica Group]	-	-	-	-	GO:0009898//cytoplasmic side of plasma membrane;GO:0043190//ATP-binding cassette (ABC) transporter complex	GO:0003938//IMP dehydrogenase activity;GO:0004122//cystathionine beta-synthase activity;GO:0005524//ATP binding;GO:0015095//magnesium ion transmembrane transporter activity;GO:0016853//isomerase activity;GO:0031263//amine-transporting ATPase activity	GO:0005975//carbohydrate metabolic process;GO:0009152//purine ribonucleotide biosynthetic process;GO:0015693//magnesium ion transport;GO:0015837//amine transport;GO:0019344//cysteine biosynthetic process
State 1,3,4 -vs- State 1,3,5	SK1G00072988	3	5.45115e-18	1.0138e-15	NSP2	EEC84159.1 hypothetical protein OsI_30530 [Oryza sativa Indica Group]	-	-	-	-	-	GO:0005515//protein binding	-
State 1,3,4 -vs- State 1,3,5	SK1G00073130	3	7.7157e-17	1.27628e-14	--	EAZ08385.1 hypothetical protein OsI_30645 [Oryza sativa Indica Group]	-	-	-	-	-	-	-
State 1,3,4 -vs- State 1,3,5	SK1G00073496	3	1.03612e-19	2.2142e-17	GSTU1	BAF24921.1 Os09g0367700, partial [Oryza sativa Japonica Group]	Metabolism;Metabolism	Global and overview maps;Metabolism of other amino acids	ko01100//Metabolic pathways;ko00480//Glutathione metabolism	K00799;K00799	-	GO:0005515//protein binding;GO:0015035//protein disulfide oxidoreductase activity;GO:0016034//maleylacetoacetate isomerase activity	GO:0006559//L-phenylalanine catabolic process;GO:0006572//tyrosine catabolic process;GO:0006749//glutathione metabolic process;GO:0006790//sulfur compound metabolic process;GO:0042965//glutaredoxin biosynthetic process;GO:0045454//cell redox homeostasis;GO:0055114//oxidation-reduction process
State 1,3,4 -vs- State 1,3,5	SK1G00073502	2	2.68906e-10	2.25109e-08	AAO	XP_015612667.1 L-ascorbate oxidase [Oryza sativa Japonica Group]	-	-	-	-	-	GO:0005375//copper ion transmembrane transporter activity;GO:0005507//copper ion binding;GO:0016491//oxidoreductase activity;GO:0050304//nitrous-oxide reductase activity	GO:0006825//copper ion transport;GO:0019333//denitrification pathway;GO:0055114//oxidation-reduction process
State 1,3,4 -vs- State 1,3,5	SK1G00073521	2	3.07181e-09	2.21106e-07	--	XP_015612219.1 uncharacterized protein LOC4346860 [Oryza sativa Japonica Group]	-	-	-	-	-	-	-
State 1,3,4 -vs- State 1,3,5	SK1G00073529	5	2.64807e-09	1.9262e-07	VDAC1	XP_015611862.1 mitochondrial outer membrane protein porin 1 [Oryza sativa Japonica Group]	-	-	-	-	GO:0005741//mitochondrial outer membrane	-	GO:0055085//transmembrane transport
State 1,3,4 -vs- State 1,3,5	SK1G00073782	2	1.62257e-10	1.40975e-08	TIFY6B	XP_015612402.1 protein TIFY 6b [Oryza sativa Japonica Group]	Environmental Information Processing	Signal transduction	ko04075//Plant hormone signal transduction	K13464	-	-	-
State 1,3,4 -vs- State 1,3,5	SK1G00073795	5	1.31248e-10	1.15491e-08	CAD8A	XP_015651435.1 probable cinnamyl alcohol dehydrogenase 8A [Oryza sativa Japonica Group]	Metabolism;Metabolism;Metabolism	Global and overview maps;Global and overview maps;Biosynthesis of other secondary metabolites	ko01100//Metabolic pathways;ko01110//Biosynthesis of secondary metabolites;ko00940//Phenylpropanoid biosynthesis	K00083;K00083;K00083	-	GO:0004024//alcohol dehydrogenase activity, zinc-dependent;GO:0004617//phosphoglycerate dehydrogenase activity;GO:0008270//zinc ion binding;GO:0008743//L-threonine 3-dehydrogenase activity;GO:0016491//oxidoreductase activity;GO:0016655//oxidoreductase activity, acting on NAD(P)H, quinone or similar compound as acceptor;GO:0018467//formaldehyde dehydrogenase activity;GO:0050607//mycothiol-dependen…	GO:0006113//fermentation;GO:0006564//L-serine biosynthetic process;GO:0006567//threonine catabolic process;GO:0008152//metabolic process;GO:0009404//toxin metabolic process;GO:0010127//mycothiol-dependent detoxification;GO:0019439//aromatic compound catabolic process;GO:0030494//bacteriochlorophyll biosynthetic process;GO:0046292//formaldehyde metabolic process;GO:0055114//oxidation-reduction pro…
State 1,3,4 -vs- State 1,3,5	SK1G00073811	3	3.93013e-09	2.75397e-07	VIT2	XP_015610875.1 vacuolar iron transporter 1.2 [Oryza sativa Japonica Group]	-	-	-	-	-	GO:0005384//manganese ion transmembrane transporter activity	GO:0030026//cellular manganese ion homeostasis
State 1,3,4 -vs- State 1,3,5	SK1G00073856	3	1.22024e-12	1.42802e-10	--	BAD33441.1 silk fibroin heavy chain-like protein [Oryza sativa Japonica Group]	-	-	-	-	-	-	-
State 1,3,4 -vs- State 1,3,5	SK1G00073961	3	2.87132e-17	5.11868e-15	Os09g0442300	XP_015611623.1 protein GAMETE EXPRESSED 1 [Oryza sativa Japonica Group]	-	-	-	-	GO:0005576//extracellular region	GO:0005524//ATP binding;GO:0008234//cysteine-type peptidase activity;GO:0008289//lipid binding;GO:0051082//unfolded protein binding	GO:0006508//proteolysis;GO:0006869//lipid transport;GO:0007059//chromosome segregation;GO:0030261//chromosome condensation
State 1,3,4 -vs- State 1,3,5	SK1G00073963	2	1.69606e-10	1.46378e-08	--	EEC84646.1 hypothetical protein OsI_31535 [Oryza sativa Indica Group]	-	-	-	-	-	-	-
State 1,3,4 -vs- State 1,3,5	SK1G00073990	2	1.94568e-11	1.90721e-09	At1g56220	XP_003578165.1 dormancy-associated protein homolog 3 [Brachypodium distachyon]	-	-	-	-	-	-	-
State 1,3,4 -vs- State 1,3,5	SK1G00074093	3	6.82775e-09	4.63344e-07	dapC	EEE69839.1 hypothetical protein OsJ_29606 [Oryza sativa Japonica Group]	Metabolism;Metabolism	Global and overview maps;Amino acid metabolism	ko01100//Metabolic pathways;ko00270//Cysteine and methionine metabolism	K23977;K23977	GO:0005737//cytoplasm	GO:0003824//catalytic activity;GO:0003961//O-acetylhomoserine aminocarboxypropyltransferase activity;GO:0004121//cystathionine beta-lyase activity;GO:0004124//cysteine synthase activity;GO:0004400//histidinol-phosphate transaminase activity;GO:0004838//L-tyrosine:2-oxoglutarate aminotransferase activity;GO:0008483//transaminase activity;GO:0009016//succinyldiaminopimelate transaminase activity;GO…	GO:0000105//histidine biosynthetic process;GO:0006520//cellular amino acid metabolic process;GO:0006531//aspartate metabolic process;GO:0006559//L-phenylalanine catabolic process;GO:0006572//tyrosine catabolic process;GO:0008652//cellular amino acid biosynthetic process;GO:0009058//biosynthetic process;GO:0009086//methionine biosynthetic process;GO:0009087//methionine catabolic process;GO:0009093…
State 1,3,4 -vs- State 1,3,5	SK1G00074122	3	1.97435e-09	1.45148e-07	MAP65-6	XP_015611654.1 65-kDa microtubule-associated protein 6 [Oryza sativa Japonica Group]	-	-	-	-	-	-	GO:0031023//microtubule organizing center organization;GO:0051225//spindle assembly
State 1,3,4 -vs- State 1,3,5	SK1G00074133	5	3.54089e-25	9.74622e-23	RPL9	XP_015612091.1 60S ribosomal protein L9 [Oryza sativa Japonica Group]	Genetic Information Processing	Translation	ko03010//Ribosome	K02940	GO:0005840//ribosome;GO:0022625//cytosolic large ribosomal subunit	GO:0003735//structural constituent of ribosome;GO:0019843//rRNA binding	GO:0006412//translation
State 1,3,4 -vs- State 1,3,5	SK1G00074163	5	4.79438e-21	1.11456e-18	HSP81-2	BAD04054.1 heat shock protein 90 [Oryza sativa Japonica Group]	Organismal Systems;Genetic Information Processing	Environmental adaptation;Folding, sorting and degradation	ko04626//Plant-pathogen interaction;ko04141//Protein processing in endoplasmic reticulum	K04079;K04079	-	GO:0005524//ATP binding;GO:0016887//ATPase activity;GO:0051082//unfolded protein binding	GO:0006457//protein folding
State 1,3,4 -vs- State 1,3,5	SK1G00074235	5	3.68365e-14	4.85593e-12	--	-	-	-	-	-	-	-	-
State 1,3,4 -vs- State 1,3,5	SK1G00074256	5	1.69752e-10	1.46378e-08	RPL7A-1	XP_015611976.1 60S ribosomal protein L7a-2 [Oryza sativa Japonica Group]	Genetic Information Processing	Translation	ko03010//Ribosome	K02936	GO:0016021//integral component of membrane	-	-
State 1,3,4 -vs- State 1,3,5	SK1G00074419	2	7.67172e-34	3.51937e-31	SGR	A2Z3E5.1 RecName: Full=Protein STAY-GREEN, chloroplastic; AltName: Full=Protein STAYGREEN; Flags: Precursor [Oryza sativa Indica Group]	Metabolism;Metabolism	Global and overview maps;Metabolism of cofactors and vitamins	ko01110//Biosynthesis of secondary metabolites;ko00860//Porphyrin and chlorophyll metabolism	K22013;K22013	-	-	-
State 1,3,4 -vs- State 1,3,5	SK1G00074449	2	1.49277e-10	1.30026e-08	RABA3	XP_015610618.1 ras-related protein RABA3 [Oryza sativa Japonica Group]	Cellular Processes	Transport and catabolism	ko04144//Endocytosis	K07904	GO:0005737//cytoplasm	GO:0003924//GTPase activity;GO:0005525//GTP binding;GO:0043022//ribosome binding	GO:0042254//ribosome biogenesis
State 1,3,4 -vs- State 1,3,5	SK1G00074475	1	1.30633e-08	8.44842e-07	DREB1H	OEL15967.1 Dehydration-responsive element-binding protein 1A [Dichanthelium oligosanthes]	-	-	-	-	-	GO:0003700//transcription factor activity, sequence-specific DNA binding	GO:0006355//regulation of transcription, DNA-templated
State 1,3,4 -vs- State 1,3,5	SK1G00074507	3	3.24778e-27	1.04433e-24	UGT79	EAZ09771.1 hypothetical protein OsI_32058 [Oryza sativa Indica Group]	-	-	-	-	-	GO:0005127//ciliary neurotrophic factor receptor binding;GO:0008194//UDP-glycosyltransferase activity;GO:0016758//transferase activity, transferring hexosyl groups	GO:0043524//negative regulation of neuron apoptotic process;GO:0070120//ciliary neurotrophic factor-mediated signaling pathway
State 1,3,4 -vs- State 1,3,5	SK1G00074745	5	1.13386e-11	1.14404e-09	RPS25B	XP_015612251.1 40S ribosomal protein S25-2 [Oryza sativa Japonica Group]	Genetic Information Processing	Translation	ko03010//Ribosome	K02975	-	GO:0003700//transcription factor activity, sequence-specific DNA binding	GO:0006355//regulation of transcription, DNA-templated
State 1,3,4 -vs- State 1,3,5	SK1G00074752	3	5.64813e-12	5.99783e-10	At5g03610	EEC85084.1 hypothetical protein OsI_32442 [Oryza sativa Indica Group]	-	-	-	-	-	GO:0016788//hydrolase activity, acting on ester bonds	-
State 1,3,4 -vs- State 1,3,5	SK1G00043988	5	3.95351e-12	4.29099e-10	GPA3	XP_015629757.1 serine/threonine-protein phosphatase BSL1 [Oryza sativa Japonica Group]	-	-	-	-	GO:0005634//nucleus	GO:0003677//DNA binding;GO:0005515//protein binding;GO:0009055//electron carrier activity;GO:0051536//iron-sulfur cluster binding	GO:0006310//DNA recombination;GO:0010124//phenylacetate catabolic process;GO:0016226//iron-sulfur cluster assembly
State 1,3,4 -vs- State 1,3,5	SK1G00043996	4	3.12672e-27	1.01489e-24	ILL3	OEL27225.1 IAA-amino acid hydrolase ILR1-like 8 [Dichanthelium oligosanthes]	-	-	-	-	-	GO:0004180//carboxypeptidase activity;GO:0004222//metalloendopeptidase activity;GO:0008777//acetylornithine deacetylase activity;GO:0009014//succinyl-diaminopimelate desuccinylase activity;GO:0016787//hydrolase activity	GO:0006508//proteolysis;GO:0006592//ornithine biosynthetic process;GO:0009089//lysine biosynthetic process via diaminopimelate
State 1,3,4 -vs- State 1,3,5	SK1G00044095	5	6.65428e-11	6.13799e-09	RPS2D	KAB8094099.1 hypothetical protein EE612_021160, partial [Oryza sativa]	Genetic Information Processing	Translation	ko03010//Ribosome	K02981	GO:0000312//plastid small ribosomal subunit;GO:0005840//ribosome;GO:0022627//cytosolic small ribosomal subunit	GO:0003723//RNA binding;GO:0003735//structural constituent of ribosome	GO:0006412//translation
State 1,3,4 -vs- State 1,3,5	SK1G00044276	5	3.42441e-10	2.80524e-08	RPS18A	XP_015630007.1 40S ribosomal protein S18 [Oryza sativa Japonica Group]	Genetic Information Processing	Translation	ko03010//Ribosome	K02964	GO:0005840//ribosome;GO:0022627//cytosolic small ribosomal subunit	GO:0003723//RNA binding;GO:0003735//structural constituent of ribosome	GO:0006412//translation
State 1,3,4 -vs- State 1,3,5	SK1G00044312	5	5.50997e-16	8.46321e-14	RPS15	XP_015632818.1 40S ribosomal protein S15-like [Oryza sativa Japonica Group]	Genetic Information Processing	Translation	ko03010//Ribosome	K02958	GO:0000314//organellar small ribosomal subunit;GO:0005840//ribosome;GO:0022627//cytosolic small ribosomal subunit	GO:0003735//structural constituent of ribosome	GO:0006412//translation;GO:0039653//suppression by virus of host transcription
State 1,3,4 -vs- State 1,3,5	SK1G00044352	2	3.99587e-16	6.19287e-14	NOV	ABF99416.1 expressed protein [Oryza sativa Japonica Group]	-	-	-	-	-	-	-
State 1,3,4 -vs- State 1,3,5	SK1G00044489	3	1.88714e-12	2.11497e-10	GSTU1	A2XMN2.1 RecName: Full=Probable glutathione S-transferase GSTU1 [Oryza sativa Indica Group]	Metabolism;Metabolism	Global and overview maps;Metabolism of other amino acids	ko01100//Metabolic pathways;ko00480//Glutathione metabolism	K00799;K00799	-	GO:0005515//protein binding;GO:0016034//maleylacetoacetate isomerase activity	GO:0006559//L-phenylalanine catabolic process;GO:0006572//tyrosine catabolic process;GO:0006749//glutathione metabolic process
State 1,3,4 -vs- State 1,3,5	SK1G00044527	1	5.54176e-27	1.73336e-24	BACOVA_02659	XP_015631169.1 uncharacterized protein LOC4334114 [Oryza sativa Japonica Group]	Metabolism;Metabolism;Metabolism;Metabolism;Metabolism	Global and overview maps;Global and overview maps;Biosynthesis of other secondary metabolites;Carbohydrate metabolism;Metabolism of other amino acids	ko01100//Metabolic pathways;ko01110//Biosynthesis of secondary metabolites;ko00940//Phenylpropanoid biosynthesis;ko00500//Starch and sucrose metabolism;ko00460//Cyanoamino acid metabolism	K05349;K05349;K05349;K05349;K05349	-	GO:0004553//hydrolase activity, hydrolyzing O-glycosyl compounds	GO:0005975//carbohydrate metabolic process
State 1,3,4 -vs- State 1,3,5	SK1G00044530	2	2.35688e-54	2.13397e-51	BACOVA_02659	XP_025879905.1 uncharacterized protein LOC4334116 isoform X1 [Oryza sativa Japonica Group]	Metabolism;Metabolism;Metabolism;Metabolism;Metabolism	Global and overview maps;Global and overview maps;Biosynthesis of other secondary metabolites;Carbohydrate metabolism;Metabolism of other amino acids	ko01100//Metabolic pathways;ko01110//Biosynthesis of secondary metabolites;ko00940//Phenylpropanoid biosynthesis;ko00500//Starch and sucrose metabolism;ko00460//Cyanoamino acid metabolism	K01188;K01188;K01188;K01188;K01188	-	GO:0004553//hydrolase activity, hydrolyzing O-glycosyl compounds	GO:0005975//carbohydrate metabolic process
State 1,3,4 -vs- State 1,3,5	SK1G00044626	2	4.63589e-09	3.19644e-07	HHO6	XP_015631206.1 transcription factor HHO5 [Oryza sativa Japonica Group]	-	-	-	-	-	-	-
State 1,3,4 -vs- State 1,3,5	SK1G00044659	1	2.54287e-17	4.58062e-15	--	XP_015632318.1 proteinase inhibitor PSI-1.2 [Oryza sativa Japonica Group]	-	-	-	-	-	GO:0004867//serine-type endopeptidase inhibitor activity	-
State 1,3,4 -vs- State 1,3,5	SK1G00044750	3	4.44004e-10	3.56093e-08	XI-F	EEE59927.1 hypothetical protein OsJ_12564 [Oryza sativa Japonica Group]	-	-	-	-	GO:0016459//myosin complex	GO:0000155//phosphorelay sensor kinase activity;GO:0003774//motor activity;GO:0004122//cystathionine beta-synthase activity;GO:0004124//cysteine synthase activity;GO:0004672//protein kinase activity;GO:0004794//L-threonine ammonia-lyase activity;GO:0005515//protein binding;GO:0005524//ATP binding;GO:0008838//diaminopropionate ammonia-lyase activity;GO:0030170//pyridoxal phosphate binding	GO:0000160//phosphorelay signal transduction system;GO:0006109//regulation of carbohydrate metabolic process;GO:0006535//cysteine biosynthetic process from serine;GO:0006549//isoleucine metabolic process;GO:0007059//chromosome segregation;GO:0008152//metabolic process;GO:0009058//biosynthetic process;GO:0009097//isoleucine biosynthetic process;GO:0019344//cysteine biosynthetic process;GO:0030261/…
State 1,3,4 -vs- State 1,3,5	SK1G00044882	5	1.50816e-08	9.71716e-07	BGLU8	OEL24735.1 Beta-glucosidase 8 [Dichanthelium oligosanthes]	Metabolism;Metabolism;Metabolism;Metabolism;Metabolism	Global and overview maps;Global and overview maps;Biosynthesis of other secondary metabolites;Carbohydrate metabolism;Metabolism of other amino acids	ko01100//Metabolic pathways;ko01110//Biosynthesis of secondary metabolites;ko00940//Phenylpropanoid biosynthesis;ko00500//Starch and sucrose metabolism;ko00460//Cyanoamino acid metabolism	K05350;K05350;K05350;K05350;K05350	GO:0009341//beta-galactosidase complex	GO:0004553//hydrolase activity, hydrolyzing O-glycosyl compounds;GO:0004565//beta-galactosidase activity;GO:0042410//6-carboxyhexanoate-CoA ligase activity	GO:0005975//carbohydrate metabolic process;GO:0006012//galactose metabolic process;GO:0009102//biotin biosynthetic process
State 1,3,4 -vs- State 1,3,5	SK1G00045329	2	9.42907e-29	3.21205e-26	2025-10-07	EAY91140.1 hypothetical protein OsI_12746 [Oryza sativa Indica Group]	-	-	-	-	GO:0005887//integral component of plasma membrane;GO:0016021//integral component of membrane	GO:0008028//monocarboxylic acid transmembrane transporter activity;GO:0015114//phosphate ion transmembrane transporter activity;GO:0015238//drug transmembrane transporter activity;GO:0015295//solute:proton symporter activity;GO:0015307//drug:proton antiporter activity;GO:0015514//nitrite efflux transmembrane transporter activity;GO:0022857//transmembrane transporter activity;GO:0042910//xenobioti…	GO:0006810//transport;GO:0006817//phosphate ion transport;GO:0006855//drug transmembrane transport;GO:0008643//carbohydrate transport;GO:0015707//nitrite transport;GO:0015718//monocarboxylic acid transport;GO:0015893//drug transport;GO:0042493//response to drug;GO:0042908//xenobiotic transport;GO:0055085//transmembrane transport
State 1,3,4 -vs- State 1,3,5	SK1G00045496	5	4.00084e-14	5.25393e-12	--	EAY90941.1 hypothetical protein OsI_12555 [Oryza sativa Indica Group]	-	-	-	-	-	-	-
State 1,3,4 -vs- State 1,3,5	SK1G00045615	5	5.29967e-14	6.8549e-12	RPL15	XP_015632743.1 60S ribosomal protein L15 [Oryza sativa Japonica Group]	Genetic Information Processing	Translation	ko03010//Ribosome	K02877	GO:0005840//ribosome	GO:0003735//structural constituent of ribosome	GO:0006412//translation
State 1,3,4 -vs- State 1,3,5	SK1G00045661	5	5.48459e-09	3.77405e-07	RPS3B	XP_015632349.1 40S ribosomal protein S3-2 [Oryza sativa Japonica Group]	Genetic Information Processing	Translation	ko03010//Ribosome	K02985	GO:0000312//plastid small ribosomal subunit;GO:0022627//cytosolic small ribosomal subunit	GO:0003723//RNA binding;GO:0003735//structural constituent of ribosome	GO:0006412//translation
State 1,3,4 -vs- State 1,3,5	SK1G00045850	5	7.6339e-10	5.95583e-08	Os03g0417800	BAH92201.1 Os03g0417800, partial [Oryza sativa Japonica Group]	-	-	-	-	-	-	GO:0006289//nucleotide-excision repair
State 1,3,4 -vs- State 1,3,5	SK1G00045944	1	9.60749e-34	4.29292e-31	3BETAHSD/D1	KAF0921362.1 hypothetical protein E2562_006935 [Oryza meyeriana var. granulata] [Oryza meyeriana]	Metabolism;Metabolism;Metabolism	Global and overview maps;Global and overview maps;Lipid metabolism	ko01100//Metabolic pathways;ko01110//Biosynthesis of secondary metabolites;ko00100//Steroid biosynthesis	K23558;K23558;K23558	-	GO:0003824//catalytic activity;GO:0003854//3-beta-hydroxy-delta5-steroid dehydrogenase activity;GO:0003978//UDP-glucose 4-epimerase activity;GO:0004043//L-aminoadipate-semialdehyde dehydrogenase activity;GO:0008460//dTDP-glucose 4,6-dehydratase activity;GO:0008712//ADP-glyceromanno-heptose 6-epimerase activity;GO:0008831//dTDP-4-dehydrorhamnose reductase activity;GO:0016616//oxidoreductase activi…	GO:0005975//carbohydrate metabolic process;GO:0006012//galactose metabolic process;GO:0006694//steroid biosynthetic process;GO:0009243//O antigen biosynthetic process;GO:0009244//lipopolysaccharide core region biosynthetic process;GO:0019305//dTDP-rhamnose biosynthetic process;GO:0019878//lysine biosynthetic process via aminoadipic acid;GO:0055114//oxidation-reduction process
State 1,3,4 -vs- State 1,3,5	SK1G00045948	3	2.12907e-15	3.09084e-13	Os03g0405500	XP_015630417.1 probable nucleoredoxin 1-1 isoform X3 [Oryza sativa Japonica Group]	-	-	-	-	GO:0005737//cytoplasm	GO:0003756//protein disulfide isomerase activity;GO:0015035//protein disulfide oxidoreductase activity;GO:0015036//disulfide oxidoreductase activity;GO:0016209//antioxidant activity;GO:0016491//oxidoreductase activity;GO:0043758//acetate-CoA ligase (ADP-forming) activity;GO:0051539//4 iron, 4 sulfur cluster binding	GO:0006457//protein folding;GO:0055114//oxidation-reduction process
State 1,3,4 -vs- State 1,3,5	SK1G00045963	5	5.41776e-14	6.9814e-12	RPL27AC	XP_015632850.1 60S ribosomal protein L27a-3 [Oryza sativa Japonica Group]	Genetic Information Processing	Translation	ko03010//Ribosome	K02900	GO:0000315//organellar large ribosomal subunit;GO:0022625//cytosolic large ribosomal subunit	GO:0003735//structural constituent of ribosome	GO:0006412//translation
State 1,3,4 -vs- State 1,3,5	SK1G00046057	5	2.45365e-15	3.53223e-13	SUS1	EAY90371.1 hypothetical protein OsI_11950 [Oryza sativa Indica Group]	Metabolism;Metabolism;Metabolism	Global and overview maps;Global and overview maps;Carbohydrate metabolism	ko01100//Metabolic pathways;ko01110//Biosynthesis of secondary metabolites;ko00500//Starch and sucrose metabolism	K00695;K00695;K00695	-	GO:0004373//glycogen (starch) synthase activity;GO:0008194//UDP-glycosyltransferase activity;GO:0009011//starch synthase activity;GO:0016157//sucrose synthase activity;GO:0016757//transferase activity, transferring glycosyl groups	GO:0005978//glycogen biosynthetic process;GO:0005985//sucrose metabolic process;GO:0009058//biosynthetic process;GO:0010125//mycothiol biosynthetic process;GO:0071793//bacillithiol biosynthetic process
State 1,3,4 -vs- State 1,3,5	SK1G00046115	3	1.06735e-10	9.61338e-09	DAHPS1	KAB8092054.1 hypothetical protein EE612_017811 [Oryza sativa]	Metabolism;Metabolism;Metabolism;Metabolism	Global and overview maps;Global and overview maps;Global and overview maps;Amino acid metabolism	ko01100//Metabolic pathways;ko01110//Biosynthesis of secondary metabolites;ko01230//Biosynthesis of amino acids;ko00400//Phenylalanine, tyrosine and tryptophan biosynthesis	K01626;K01626;K01626;K01626	-	GO:0003849//3-deoxy-7-phosphoheptulonate synthase activity	GO:0009073//aromatic amino acid family biosynthetic process;GO:0009423//chorismate biosynthetic process
State 1,3,4 -vs- State 1,3,5	SK1G00046118	5	5.42435e-10	4.30023e-08	COX6B-1	XP_015630536.1 cytochrome c oxidase subunit 6b-1 [Oryza sativa Japonica Group]	Metabolism;Metabolism	Global and overview maps;Energy metabolism	ko01100//Metabolic pathways;ko00190//Oxidative phosphorylation	K02267;K02267	GO:0005739//mitochondrion;GO:0045277//respiratory chain complex IV	-	-
State 1,3,4 -vs- State 1,3,5	SK1G00046130	2	1.23516e-10	1.09528e-08	SCPL51	KAB8092074.1 hypothetical protein EE612_017838 [Oryza sativa]	-	-	-	-	-	GO:0004185//serine-type carboxypeptidase activity	GO:0006508//proteolysis
State 1,3,4 -vs- State 1,3,5	SK1G00046198	2	1.78202e-75	2.35816e-72	DMP2	EAY90186.1 hypothetical protein OsI_11750 [Oryza sativa Indica Group]	-	-	-	-	-	-	-
State 1,3,4 -vs- State 1,3,5	SK1G00046296	2	1.71375e-11	1.68949e-09	--	EAY90076.1 hypothetical protein OsI_11646 [Oryza sativa Indica Group]	-	-	-	-	-	GO:0016787//hydrolase activity	GO:0030163//protein catabolic process
State 1,3,4 -vs- State 1,3,5	SK1G00046385	2	5.85205e-14	7.45724e-12	--	ABF95918.1 triacylglycerol Lipase, putative, expressed [Oryza sativa Japonica Group]	-	-	-	-	-	-	-
State 1,3,4 -vs- State 1,3,5	SK1G00046386	2	1.18873e-40	6.93212e-38	SRFP1	XP_015628865.1 E3 ubiquitin-protein ligase SRFP1-like [Oryza sativa Japonica Group]	Genetic Information Processing	Folding, sorting and degradation	ko04120//Ubiquitin mediated proteolysis	K10144	-	GO:0008270//zinc ion binding;GO:0046872//metal ion binding	-
State 1,3,4 -vs- State 1,3,5	SK1G00046432	2	9.95924e-21	2.26926e-18	ASD1	EEC75141.1 hypothetical protein OsI_11337 [Oryza sativa Indica Group]	Metabolism;Metabolism	Global and overview maps;Carbohydrate metabolism	ko01100//Metabolic pathways;ko00520//Amino sugar and nucleotide sugar metabolism	K01209;K01209	-	GO:0016798//hydrolase activity, acting on glycosyl bonds;GO:0046556//alpha-L-arabinofuranosidase activity	GO:0046373//L-arabinose metabolic process
State 1,3,4 -vs- State 1,3,5	SK1G00046480	2	1.15611e-35	5.93688e-33	NAC046	EAY89847.1 hypothetical protein OsI_11397 [Oryza sativa Indica Group]	-	-	-	-	-	GO:0003677//DNA binding	GO:0006355//regulation of transcription, DNA-templated
State 1,3,4 -vs- State 1,3,5	SK1G00046482	3	5.10059e-36	2.65895e-33	R40C1	XP_015631880.1 ricin B-like lectin R40C1 [Oryza sativa Japonica Group]	-	-	-	-	-	-	-
State 1,3,4 -vs- State 1,3,5	SK1G00046543	5	3.45494e-11	3.24784e-09	PR1	EEC75066.1 hypothetical protein OsI_11186 [Oryza sativa Indica Group]	Genetic Information Processing	Translation	ko03008//Ribosome biogenesis in eukaryotes	K14546	GO:0009279//cell outer membrane	GO:0005515//protein binding	GO:0006952//defense response
State 1,3,4 -vs- State 1,3,5	SK1G00046559	2	5.103e-13	6.09632e-11	--	EAY89669.1 hypothetical protein OsI_11202 [Oryza sativa Indica Group]	-	-	-	-	GO:0005680//anaphase-promoting complex	GO:0003723//RNA binding;GO:0008270//zinc ion binding;GO:0046872//metal ion binding;GO:0061630//ubiquitin protein ligase activity;GO:0097602//cullin family protein binding	GO:0031145//anaphase-promoting complex-dependent proteasomal ubiquitin-dependent protein catabolic process
State 1,3,4 -vs- State 1,3,5	SK1G00046590	3	1.621e-12	1.84067e-10	GEP	KAB8091474.1 hypothetical protein EE612_016965 [Oryza sativa]	-	-	-	-	-	GO:0008236//serine-type peptidase activity;GO:0016787//hydrolase activity;GO:0030410//nicotianamine synthase activity	GO:0006508//proteolysis;GO:0030418//nicotianamine biosynthetic process
State 1,3,4 -vs- State 1,3,5	SK1G00046591	3	6.31135e-19	1.25519e-16	NAS2	AQU42826.1 nicotianamine synthase 2 [Oryza sativa Indica Group]	-	-	-	-	-	GO:0030410//nicotianamine synthase activity	GO:0030418//nicotianamine biosynthetic process
State 1,3,4 -vs- State 1,3,5	SK1G00046614	2	4.72281e-15	6.6054e-13	At4g16230	EAY89729.1 hypothetical protein OsI_11268 [Oryza sativa Indica Group]	-	-	-	-	-	GO:0016788//hydrolase activity, acting on ester bonds	-
State 1,3,4 -vs- State 1,3,5	SK1G00046689	3	2.89043e-14	3.85458e-12	GSTZ5	XP_015630359.1 protein IN2-1 homolog B [Oryza sativa Japonica Group]	Metabolism;Metabolism	Global and overview maps;Metabolism of other amino acids	ko01100//Metabolic pathways;ko00480//Glutathione metabolism	K00799;K00799	-	GO:0005515//protein binding;GO:0015035//protein disulfide oxidoreductase activity;GO:0016034//maleylacetoacetate isomerase activity	GO:0006559//L-phenylalanine catabolic process;GO:0006572//tyrosine catabolic process;GO:0006749//glutathione metabolic process;GO:0006790//sulfur compound metabolic process;GO:0042965//glutaredoxin biosynthetic process;GO:0045454//cell redox homeostasis;GO:0055114//oxidation-reduction process
State 1,3,4 -vs- State 1,3,5	SK1G00046703	2	3.96563e-10	3.19535e-08	--	XP_015627951.1 uncharacterized protein LOC4332473 [Oryza sativa Japonica Group]	-	-	-	-	-	-	-
State 1,3,4 -vs- State 1,3,5	SK1G00046705	3	2.9136e-29	1.02291e-26	APX1	XP_015630498.1 L-ascorbate peroxidase 1, cytosolic [Oryza sativa Japonica Group]	Metabolism;Metabolism;Metabolism	Global and overview maps;Metabolism of other amino acids;Carbohydrate metabolism	ko01100//Metabolic pathways;ko00480//Glutathione metabolism;ko00053//Ascorbate and aldarate metabolism	K00434;K00434;K00434	-	GO:0004096//catalase activity;GO:0004601//peroxidase activity;GO:0020037//heme binding	GO:0006979//response to oxidative stress;GO:0055114//oxidation-reduction process
State 1,3,4 -vs- State 1,3,5	SK1G00046720	2	6.27051e-33	2.63101e-30	MT1B	XP_015628821.1 metallothionein-like protein 1B [Oryza sativa Japonica Group]	-	-	-	-	-	GO:0008270//zinc ion binding;GO:0046872//metal ion binding	-
State 1,3,4 -vs- State 1,3,5	SK1G00046739	2	3.65421e-12	3.99132e-10	TBL3	OEL27281.1 Protein trichome birefringence-like 3 [Dichanthelium oligosanthes]	-	-	-	-	-	GO:0005524//ATP binding;GO:0030983//mismatched DNA binding	GO:0006298//mismatch repair
State 1,3,4 -vs- State 1,3,5	SK1G00046777	5	1.82401e-10	1.56893e-08	RPS7	XP_015631394.1 40S ribosomal protein S7-like [Oryza sativa Japonica Group]	Genetic Information Processing	Translation	ko03010//Ribosome	K02993	GO:0005840//ribosome	GO:0003735//structural constituent of ribosome	GO:0006412//translation
State 1,3,4 -vs- State 1,3,5	SK1G00046784	3	8.57707e-11	7.78635e-09	LAC3	XP_015629013.1 laccase-3-like [Oryza sativa Japonica Group]	-	-	-	-	-	GO:0005375//copper ion transmembrane transporter activity;GO:0005507//copper ion binding;GO:0016491//oxidoreductase activity;GO:0050304//nitrous-oxide reductase activity	GO:0006825//copper ion transport;GO:0019333//denitrification pathway;GO:0055114//oxidation-reduction process
State 1,3,4 -vs- State 1,3,5	SK1G00046904	3	2.15979e-18	4.10552e-16	UXS3	XP_015632111.1 UDP-glucuronic acid decarboxylase 6 [Oryza sativa Japonica Group]	Metabolism;Metabolism	Global and overview maps;Carbohydrate metabolism	ko01100//Metabolic pathways;ko00520//Amino sugar and nucleotide sugar metabolism	K08678;K08678	-	GO:0003824//catalytic activity;GO:0003854//3-beta-hydroxy-delta5-steroid dehydrogenase activity;GO:0003978//UDP-glucose 4-epimerase activity;GO:0004043//L-aminoadipate-semialdehyde dehydrogenase activity;GO:0008446//GDP-mannose 4,6-dehydratase activity;GO:0008460//dTDP-glucose 4,6-dehydratase activity;GO:0008712//ADP-glyceromanno-heptose 6-epimerase activity;GO:0008831//dTDP-4-dehydrorhamnose red…	GO:0000271//polysaccharide biosynthetic process;GO:0005975//carbohydrate metabolic process;GO:0006012//galactose metabolic process;GO:0006694//steroid biosynthetic process;GO:0009243//O antigen biosynthetic process;GO:0009244//lipopolysaccharide core region biosynthetic process;GO:0019305//dTDP-rhamnose biosynthetic process;GO:0019878//lysine biosynthetic process via aminoadipic acid;GO:0055114//…
State 1,3,4 -vs- State 1,3,5	SK1G00046931	2	1.66916e-11	1.6598e-09	ACR8	XP_015627838.1 ACT domain-containing protein ACR8 [Oryza sativa Japonica Group]	-	-	-	-	-	GO:0008773//[protein-PII] uridylyltransferase activity	GO:0006629//lipid metabolic process;GO:0018177//protein uridylylation
State 1,3,4 -vs- State 1,3,5	SK1G00046932	2	1.12276e-10	1.00337e-08	ATG9	KAB8091081.1 hypothetical protein EE612_016492 [Oryza sativa]	Cellular Processes	Transport and catabolism	ko04136//Autophagy - other eukaryotes	K17907	-	-	-
State 1,3,4 -vs- State 1,3,5	SK1G00046936	3	4.61256e-09	3.18674e-07	ENO1	EEC74867.1 hypothetical protein OsI_10758 [Oryza sativa Indica Group]	Metabolism;Metabolism;Metabolism;Metabolism;Metabolism;Genetic Information Processing	Global and overview maps;Global and overview maps;Global and overview maps;Global and overview maps;Carbohydrate metabolism;Folding, sorting and degradation	ko01100//Metabolic pathways;ko01110//Biosynthesis of secondary metabolites;ko01200//Carbon metabolism;ko01230//Biosynthesis of amino acids;ko00010//Glycolysis / Gluconeogenesis;ko03018//RNA degradation	K01689;K01689;K01689;K01689;K01689;K01689	-	GO:0004634//phosphopyruvate hydratase activity;GO:0016836//hydro-lyase activity;GO:0033926//glycopeptide alpha-N-acetylgalactosaminidase activity	GO:0006096//glycolytic process;GO:0009234//menaquinone biosynthetic process
State 1,3,4 -vs- State 1,3,5	SK1G00046951	2	1.82206e-19	3.79471e-17	--	EEC74873.1 hypothetical protein OsI_10773 [Oryza sativa Indica Group]	-	-	-	-	GO:0016020//membrane	-	-
State 1,3,4 -vs- State 1,3,5	SK1G00046979	2	1.91659e-18	3.70463e-16	Os03g0255100	KAB8091133.1 hypothetical protein EE612_016565 [Oryza sativa]	-	-	-	-	GO:0009341//beta-galactosidase complex	GO:0004553//hydrolase activity, hydrolyzing O-glycosyl compounds;GO:0004565//beta-galactosidase activity;GO:0030246//carbohydrate binding	GO:0005975//carbohydrate metabolic process
State 1,3,4 -vs- State 1,3,5	SK1G00046999	3	1.0743e-63	1.23208e-60	ARPN	XP_015629232.1 chemocyanin [Oryza sativa Japonica Group]	-	-	-	-	-	GO:0009055//electron carrier activity	-
State 1,3,4 -vs- State 1,3,5	SK1G00047050	5	6.00532e-22	1.45506e-19	Ub-CEP52-1	XP_006649691.1 PREDICTED: ubiquitin-60S ribosomal protein L40-2 [Oryza brachyantha]	Genetic Information Processing	Translation	ko03010//Ribosome	K02927	GO:0005840//ribosome	GO:0003735//structural constituent of ribosome;GO:0005515//protein binding	GO:0006289//nucleotide-excision repair;GO:0006412//translation
State 1,3,4 -vs- State 1,3,5	SK1G00047094	2	2.08494e-16	3.30573e-14	--	EAY89206.1 hypothetical protein OsI_10702 [Oryza sativa Indica Group]	-	-	-	-	-	-	-
State 1,3,4 -vs- State 1,3,5	SK1G00047124	3	1.48179e-15	2.17873e-13	--	XP_015629153.1 uncharacterized protein LOC4332235 [Oryza sativa Japonica Group]	-	-	-	-	-	-	-
State 1,3,4 -vs- State 1,3,5	SK1G00047156	2	1.08998e-24	2.95289e-22	BGLU6	EEC74750.1 hypothetical protein OsI_10506 [Oryza sativa Indica Group]	Metabolism;Metabolism;Metabolism;Metabolism;Metabolism	Global and overview maps;Global and overview maps;Biosynthesis of other secondary metabolites;Carbohydrate metabolism;Metabolism of other amino acids	ko01100//Metabolic pathways;ko01110//Biosynthesis of secondary metabolites;ko00940//Phenylpropanoid biosynthesis;ko00500//Starch and sucrose metabolism;ko00460//Cyanoamino acid metabolism	K01188;K01188;K01188;K01188;K01188	GO:0009341//beta-galactosidase complex	GO:0004553//hydrolase activity, hydrolyzing O-glycosyl compounds;GO:0004565//beta-galactosidase activity	GO:0005975//carbohydrate metabolic process;GO:0006012//galactose metabolic process;GO:0071704//organic substance metabolic process
State 1,3,4 -vs- State 1,3,5	SK1G00047222	2	4.28761e-09	2.98019e-07	PXG	BAH01599.1 unnamed protein product [Oryza sativa Japonica Group]	Metabolism	Lipid metabolism	ko00073//Cutin, suberine and wax biosynthesis	K17991	-	GO:0005509//calcium ion binding	-
State 1,3,4 -vs- State 1,3,5	SK1G00047260	2	1.08268e-33	4.77573e-31	--	AAN60995.1 Unknown protein [Oryza sativa Japonica Group]	-	-	-	-	-	-	-
State 1,3,4 -vs- State 1,3,5	SK1G00047311	2	4.6059e-26	1.34297e-23	OsI_010151	XP_015632599.1 UPF0496 protein 1 [Oryza sativa Japonica Group]	-	-	-	-	GO:0016021//integral component of membrane	GO:0008514//organic anion transmembrane transporter activity	GO:0015711//organic anion transport
State 1,3,4 -vs- State 1,3,5	SK1G00047319	5	3.92001e-12	4.2681e-10	RPS3A	XP_015631418.1 40S ribosomal protein S3a [Oryza sativa Japonica Group]	Genetic Information Processing	Translation	ko03010//Ribosome	K02984	GO:0005840//ribosome	GO:0003690//double-stranded DNA binding;GO:0003735//structural constituent of ribosome	GO:0006355//regulation of transcription, DNA-templated;GO:0006412//translation;GO:0006629//lipid metabolic process
State 1,3,4 -vs- State 1,3,5	SK1G00047325	2	5.33563e-17	9.04324e-15	XYN5	XP_015632159.1 uncharacterized protein LOC9271490 [Oryza sativa Japonica Group]	-	-	-	-	-	GO:0004553//hydrolase activity, hydrolyzing O-glycosyl compounds;GO:0016798//hydrolase activity, acting on glycosyl bonds	GO:0005975//carbohydrate metabolic process
State 1,3,4 -vs- State 1,3,5	SK1G00047328	2	1.46947e-24	3.9499e-22	At4g33820	EEE58525.1 hypothetical protein OsJ_09814 [Oryza sativa Japonica Group]	-	-	-	-	GO:0005575//cellular_component	GO:0003674//molecular_function;GO:0004553//hydrolase activity, hydrolyzing O-glycosyl compounds;GO:0016798//hydrolase activity, acting on glycosyl bonds	GO:0005975//carbohydrate metabolic process;GO:0008150//biological_process
State 1,3,4 -vs- State 1,3,5	SK1G00047338	2	2.694e-11	2.56049e-09	ACA2	XP_015631775.1 calcium-transporting ATPase 2, plasma membrane-type [Oryza sativa Japonica Group]	-	-	-	-	GO:0031004//potassium ion-transporting ATPase complex	GO:0004008//copper-exporting ATPase activity;GO:0004647//phosphoserine phosphatase activity;GO:0005375//copper ion transmembrane transporter activity;GO:0005388//calcium-transporting ATPase activity;GO:0005516//calmodulin binding;GO:0008556//potassium-transporting ATPase activity;GO:0008967//phosphoglycolate phosphatase activity;GO:0015434//cadmium-transporting ATPase activity;GO:0015444//magnesi…	GO:0006545//glycine biosynthetic process;GO:0006564//L-serine biosynthetic process;GO:0006813//potassium ion transport;GO:0006816//calcium ion transport;GO:0006825//copper ion transport;GO:0008152//metabolic process;GO:0015691//cadmium ion transport;GO:0015693//magnesium ion transport;GO:0030001//metal ion transport
State 1,3,4 -vs- State 1,3,5	SK1G00047389	2	3.95557e-19	8.05298e-17	--	AAF65457.1 OSE3 [Oryza sativa Indica Group]	-	-	-	-	-	-	-
State 1,3,4 -vs- State 1,3,5	SK1G00047421	5	2.62941e-35	1.31112e-32	REFA1	XP_006649493.1 PREDICTED: elongation factor 1-alpha [Oryza brachyantha]	Genetic Information Processing	Translation	ko03013//RNA transport	K03231	GO:0005737//cytoplasm	GO:0003743//translation initiation factor activity;GO:0003746//translation elongation factor activity;GO:0003747//translation release factor activity;GO:0003924//GTPase activity;GO:0004781//sulfate adenylyltransferase (ATP) activity;GO:0005525//GTP binding;GO:0016620//oxidoreductase activity, acting on the aldehyde or oxo group of donors, NAD or NADP as acceptor;GO:0043022//ribosome binding;GO:00…	GO:0000103//sulfate assimilation;GO:0001514//selenocysteine incorporation;GO:0006412//translation;GO:0006413//translational initiation;GO:0006414//translational elongation;GO:0006415//translational termination;GO:0006950//response to stress;GO:0008652//cellular amino acid biosynthetic process;GO:0042254//ribosome biogenesis;GO:0055114//oxidation-reduction process
State 1,3,4 -vs- State 1,3,5	SK1G00047451	5	2.97832e-10	2.48116e-08	GSVIVT00034021001	EAY88799.1 hypothetical protein OsI_10272 [Oryza sativa Indica Group]	Genetic Information Processing	Translation	ko03010//Ribosome	K02998	GO:0000314//organellar small ribosomal subunit;GO:0005840//ribosome;GO:0022627//cytosolic small ribosomal subunit	GO:0003735//structural constituent of ribosome	GO:0006412//translation
State 1,3,4 -vs- State 1,3,5	SK1G00047592	2	7.5158e-21	1.72392e-18	SULTR3;1	EAY88641.1 hypothetical protein OsI_10116 [Oryza sativa Indica Group]	-	-	-	-	GO:0016020//membrane;GO:0016021//integral component of membrane	GO:0015116//sulfate transmembrane transporter activity;GO:0045152//antisigma factor binding	GO:0006355//regulation of transcription, DNA-templated;GO:0008272//sulfate transport
State 1,3,4 -vs- State 1,3,5	SK1G00047644	2	3.38631e-27	1.06889e-24	--	EEC74591.1 hypothetical protein OsI_10173 [Oryza sativa Indica Group]	-	-	-	-	-	-	-
State 1,3,4 -vs- State 1,3,5	SK1G00047698	2	1.53632e-08	9.88011e-07	BHLH93	EEC74462.1 hypothetical protein OsI_09897 [Oryza sativa Indica Group]	-	-	-	-	-	GO:0046983//protein dimerization activity	-
State 1,3,4 -vs- State 1,3,5	SK1G00047723	5	4.52632e-12	4.85148e-10	RPL23A	NP_001132424.1 60S ribosomal protein L23-like [Zea mays]	Genetic Information Processing	Translation	ko03010//Ribosome	K02894	GO:0000315//organellar large ribosomal subunit;GO:0005840//ribosome;GO:0022625//cytosolic large ribosomal subunit	GO:0003735//structural constituent of ribosome	GO:0006412//translation
State 1,3,4 -vs- State 1,3,5	SK1G00047738	5	4.53144e-10	3.62579e-08	RPL21E	XP_015632757.1 60S ribosomal protein L21-2 [Oryza sativa Japonica Group]	Genetic Information Processing	Translation	ko03010//Ribosome	K02889	GO:0005840//ribosome	GO:0003735//structural constituent of ribosome	GO:0006412//translation
State 1,3,4 -vs- State 1,3,5	SK1G00047772	3	2.63132e-61	2.74343e-58	TIP1-1	XP_015631095.1 probable aquaporin TIP1-1 [Oryza sativa Japonica Group]	-	-	-	-	GO:0016020//membrane	GO:0015267//channel activity	GO:0055085//transmembrane transport
State 1,3,4 -vs- State 1,3,5	SK1G00047781	1	9.05463e-30	3.24514e-27	LSI2	XP_015630657.1 silicon efflux transporter LSI2-like isoform X1 [Oryza sativa Japonica Group]	-	-	-	-	GO:0005664//nuclear origin of replication recognition complex;GO:0005887//integral component of plasma membrane;GO:0016021//integral component of membrane	GO:0003677//DNA binding;GO:0008509//anion transmembrane transporter activity;GO:0015105//arsenite transmembrane transporter activity;GO:0015385//sodium:proton antiporter activity	GO:0006260//DNA replication;GO:0006814//sodium ion transport;GO:0006818//hydrogen transport;GO:0006820//anion transport;GO:0015700//arsenite transport;GO:0046685//response to arsenic-containing substance;GO:0055085//transmembrane transport
State 1,3,4 -vs- State 1,3,5	SK1G00047784	2	7.34476e-12	7.68097e-10	OsI_009784	AAK98722.1 Hypothetical protein [Oryza sativa Japonica Group]	-	-	-	-	-	GO:0005515//protein binding	-
State 1,3,4 -vs- State 1,3,5	SK1G00047806	2	1.80872e-24	4.82411e-22	RBL2	XP_015631615.1 RHOMBOID-like protein 2 [Oryza sativa Japonica Group]	-	-	-	-	GO:0005887//integral component of plasma membrane;GO:0016021//integral component of membrane	GO:0004252//serine-type endopeptidase activity	GO:0006464//cellular protein modification process;GO:0019538//protein metabolic process
State 1,3,4 -vs- State 1,3,5	SK1G00047842	2	9.25383e-43	5.78886e-40	GSVIVT00037159001	XP_015632445.1 peroxidase 5 [Oryza sativa Japonica Group]	Metabolism;Metabolism;Metabolism	Global and overview maps;Global and overview maps;Biosynthesis of other secondary metabolites	ko01100//Metabolic pathways;ko01110//Biosynthesis of secondary metabolites;ko00940//Phenylpropanoid biosynthesis	K00430;K00430;K00430	-	GO:0004601//peroxidase activity;GO:0020037//heme binding	GO:0006979//response to oxidative stress;GO:0055114//oxidation-reduction process
State 1,3,4 -vs- State 1,3,5	SK1G00047868	2	1.09756e-16	1.79822e-14	GSVIVT00026920001	XP_015627855.1 probable polygalacturonase [Oryza sativa Japonica Group]	-	-	-	-	-	GO:0004650//polygalacturonase activity	GO:0005975//carbohydrate metabolic process
State 1,3,4 -vs- State 1,3,5	SK1G00047951	2	8.86252e-78	1.45202e-74	EXPB7	XP_015632130.1 expansin-B7 [Oryza sativa Japonica Group]	-	-	-	-	-	-	-
State 1,3,4 -vs- State 1,3,5	SK1G00047953	2	1.3496e-75	1.85738e-72	AZI1	XP_015632237.1 cortical cell-delineating protein [Oryza sativa Japonica Group]	-	-	-	-	-	GO:0004197//cysteine-type endopeptidase activity	GO:0043687//post-translational protein modification
State 1,3,4 -vs- State 1,3,5	SK1G00047954	2	9.81842e-45	6.89413e-42	AZI1	XP_015632237.1 cortical cell-delineating protein [Oryza sativa Japonica Group]	-	-	-	-	-	-	-
State 1,3,4 -vs- State 1,3,5	SK1G00047977	3	1.5802e-32	6.39629e-30	LSI2	XP_015632217.1 silicon efflux transporter LSI2 [Oryza sativa Japonica Group]	-	-	-	-	GO:0016021//integral component of membrane	GO:0015105//arsenite transmembrane transporter activity	GO:0015700//arsenite transport;GO:0046685//response to arsenic-containing substance;GO:0055085//transmembrane transport
State 1,3,4 -vs- State 1,3,5	SK1G00048002	3	2.20978e-12	2.44468e-10	At1g73230	EAY88231.1 hypothetical protein OsI_09683 [Oryza sativa Indica Group]	-	-	-	-	-	-	-
State 1,3,4 -vs- State 1,3,5	SK1G00048076	2	1.0962e-08	7.21148e-07	nvj2	EEC74285.1 hypothetical protein OsI_09535 [Oryza sativa Indica Group]	-	-	-	-	-	GO:0005516//calmodulin binding;GO:0030507//spectrin binding	GO:0031175//neuron projection development
State 1,3,4 -vs- State 1,3,5	SK1G00048106	3	1.3867e-50	1.13597e-47	PIP1-3	XP_015625572.1 aquaporin PIP 1-3 [Oryza sativa Japonica Group]	-	-	-	-	GO:0016020//membrane	GO:0015267//channel activity	GO:0055085//transmembrane transport
State 1,3,4 -vs- State 1,3,5	SK1G00048150	2	9.09627e-10	7.03295e-08	PED1	AIV98504.1 3-ketoacyl-CoA thiolase-like protein [Oryza sativa Japonica Group]	Metabolism;Metabolism;Cellular Processes;Metabolism;Metabolism;Metabolism;Metabolism;Metabolism	Global and overview maps;Global and overview maps;Transport and catabolism;Global and overview maps;Lipid metabolism;Lipid metabolism;Amino acid metabolism;Lipid metabolism	ko01100//Metabolic pathways;ko01110//Biosynthesis of secondary metabolites;ko04146//Peroxisome;ko01212//Fatty acid metabolism;ko00592//alpha-Linolenic acid metabolism;ko00071//Fatty acid degradation;ko00280//Valine, leucine and isoleucine degradation;ko01040//Biosynthesis of unsaturated fatty acids	K07513;K07513;K07513;K07513;K07513;K07513;K07513;K07513	GO:0042600//chorion	GO:0003985//acetyl-CoA C-acetyltransferase activity;GO:0003988//acetyl-CoA C-acyltransferase activity;GO:0016747//transferase activity, transferring acyl groups other than amino-acyl groups;GO:0033817//beta-ketoacyl-acyl-carrier-protein synthase II activity	GO:0006631//fatty acid metabolic process;GO:0006633//fatty acid biosynthetic process;GO:0007275//multicellular organism development;GO:0009062//fatty acid catabolic process
State 1,3,4 -vs- State 1,3,5	SK1G00048155	2	2.8268e-14	3.78439e-12	XI-B	BAD21517.1 putative myosin subfamily XI heavy chain [Oryza sativa Japonica Group]	-	-	-	-	GO:0016459//myosin complex	GO:0000155//phosphorelay sensor kinase activity;GO:0003774//motor activity;GO:0004672//protein kinase activity;GO:0005515//protein binding;GO:0005524//ATP binding	GO:0000160//phosphorelay signal transduction system;GO:0000910//cytokinesis;GO:0006109//regulation of carbohydrate metabolic process;GO:0006810//transport;GO:0007059//chromosome segregation;GO:0030261//chromosome condensation
State 1,3,4 -vs- State 1,3,5	SK1G00048177	5	5.73195e-14	7.33136e-12	RPL23A	NP_001132424.1 60S ribosomal protein L23-like [Zea mays]	Genetic Information Processing	Translation	ko03010//Ribosome	K02894	GO:0000315//organellar large ribosomal subunit;GO:0005840//ribosome;GO:0022625//cytosolic large ribosomal subunit	GO:0003735//structural constituent of ribosome	GO:0006412//translation
State 1,3,4 -vs- State 1,3,5	SK1G00048200	2	7.77744e-44	5.04888e-41	NAC100	KAB8089448.1 hypothetical protein EE612_014395 [Oryza sativa]	-	-	-	-	-	GO:0003677//DNA binding	GO:0006355//regulation of transcription, DNA-templated
State 1,3,4 -vs- State 1,3,5	SK1G00048244	5	8.41898e-16	1.26491e-13	RPS30A	KAE8651498.1 hypothetical protein Csa_019324 [Cucumis sativus]	Genetic Information Processing	Translation	ko03010//Ribosome	K02983	GO:0005840//ribosome	GO:0003735//structural constituent of ribosome	GO:0006412//translation
State 1,3,4 -vs- State 1,3,5	SK1G00048295	5	4.23229e-11	3.96774e-09	RPL39A	RZC15298.1 60S ribosomal protein L39 [Glycine soja]	Genetic Information Processing	Translation	ko03010//Ribosome	K02924	GO:0005840//ribosome	GO:0003735//structural constituent of ribosome	GO:0006412//translation
State 1,3,4 -vs- State 1,3,5	SK1G00048448	2	3.91798e-15	5.52468e-13	--	XP_015623261.1 uncharacterized protein LOC4330887 [Oryza sativa Japonica Group]	-	-	-	-	-	-	-
State 1,3,4 -vs- State 1,3,5	SK1G00048501	2	4.464e-16	6.88736e-14	--	EAY87660.1 hypothetical protein OsI_09071 [Oryza sativa Indica Group]	-	-	-	-	-	GO:0016787//hydrolase activity	GO:0006629//lipid metabolic process
State 1,3,4 -vs- State 1,3,5	SK1G00048554	2	2.26893e-11	2.18669e-09	PHI-1	KAF3793729.1 EXORDIUM-like 4 protein [Nymphaea thermarum]	-	-	-	-	GO:0012506//vesicle membrane	GO:0005198//structural molecule activity	-
State 1,3,4 -vs- State 1,3,5	SK1G00048572	3	4.3629e-14	5.68598e-12	ANNAT7	ADE61246.1 annexin 2 [Oryza sativa Indica Group]	-	-	-	-	-	GO:0005509//calcium ion binding;GO:0005544//calcium-dependent phospholipid binding	-
State 1,3,4 -vs- State 1,3,5	SK1G00048576	3	3.04004e-13	3.68295e-11	PLAT1	XP_015623296.1 PLAT domain-containing protein 3 [Oryza sativa Japonica Group]	-	-	-	-	-	GO:0005515//protein binding	-
State 1,3,4 -vs- State 1,3,5	SK1G00048623	3	8.06524e-09	5.41978e-07	NIP2-1	XP_015626173.1 aquaporin NIP2-1 [Oryza sativa Japonica Group]	-	-	-	-	GO:0016020//membrane	GO:0015267//channel activity	GO:0055085//transmembrane transport
State 1,3,4 -vs- State 1,3,5	SK1G00048703	3	3.6903e-10	2.98048e-08	GLN1-1	XP_015626102.1 glutamine synthetase cytosolic isozyme 1-1 [Oryza sativa Japonica Group]	Metabolism;Metabolism;Metabolism;Metabolism;Metabolism;Metabolism	Global and overview maps;Global and overview maps;Carbohydrate metabolism;Amino acid metabolism;Amino acid metabolism;Energy metabolism	ko01100//Metabolic pathways;ko01230//Biosynthesis of amino acids;ko00630//Glyoxylate and dicarboxylate metabolism;ko00250//Alanine, aspartate and glutamate metabolism;ko00220//Arginine biosynthesis;ko00910//Nitrogen metabolism	K01915;K01915;K01915;K01915;K01915;K01915	-	GO:0004356//glutamate-ammonia ligase activity	GO:0006542//glutamine biosynthetic process;GO:0006807//nitrogen compound metabolic process
State 1,3,4 -vs- State 1,3,5	SK1G00048707	2	4.03043e-19	8.15711e-17	PXG5	XP_015625977.1 uncharacterized protein LOC4330644 [Oryza sativa Japonica Group]	Metabolism	Lipid metabolism	ko00073//Cutin, suberine and wax biosynthesis	K17991	-	GO:0005509//calcium ion binding	-
State 1,3,4 -vs- State 1,3,5	SK1G00048810	1	3.11859e-33	1.32467e-30	At5g10770	XP_015626129.1 aspartyl protease family protein At5g10770 [Oryza sativa Japonica Group]	-	-	-	-	-	-	-
State 1,3,4 -vs- State 1,3,5	SK1G00048812	2	1.54655e-41	9.17427e-39	At5g10770	EAY87323.1 hypothetical protein OsI_08727 [Oryza sativa Indica Group]	-	-	-	-	-	-	-
State 1,3,4 -vs- State 1,3,5	SK1G00048913	1	4.11072e-10	3.30452e-08	--	OEL18155.1 hypothetical protein BAE44_0020828 [Dichanthelium oligosanthes]	-	-	-	-	-	GO:0008902//hydroxymethylpyrimidine kinase activity;GO:0008972//phosphomethylpyrimidine kinase activity	GO:0009228//thiamine biosynthetic process
State 1,3,4 -vs- State 1,3,5	SK1G00048975	2	1.89713e-09	1.4007e-07	XTH30	EAY87162.1 hypothetical protein OsI_08563 [Oryza sativa Indica Group]	-	-	-	-	GO:0005618//cell wall;GO:0048046//apoplast	GO:0004553//hydrolase activity, hydrolyzing O-glycosyl compounds;GO:0016762//xyloglucan:xyloglucosyl transferase activity	GO:0005975//carbohydrate metabolic process;GO:0006073//cellular glucan metabolic process
State 1,3,4 -vs- State 1,3,5	SK1G00049143	2	2.63273e-63	2.922e-60	MFSD14A	EAY87003.1 hypothetical protein OsI_08398 [Oryza sativa Indica Group]	-	-	-	-	GO:0005887//integral component of plasma membrane	GO:0015295//solute:proton symporter activity;GO:0015514//nitrite efflux transmembrane transporter activity;GO:0022857//transmembrane transporter activity;GO:0042910//xenobiotic transporter activity	GO:0006810//transport;GO:0015707//nitrite transport;GO:0042908//xenobiotic transport;GO:0055085//transmembrane transport
State 1,3,4 -vs- State 1,3,5	SK1G00049155	3	3.31353e-17	5.84643e-15	PIP1-1	XP_015625393.1 aquaporin PIP1-1 [Oryza sativa Japonica Group]	-	-	-	-	GO:0016020//membrane	GO:0015267//channel activity	GO:0055085//transmembrane transport
State 1,3,4 -vs- State 1,3,5	SK1G00049176	3	2.56025e-43	1.63126e-40	EARLI1	TVU28924.1 hypothetical protein EJB05_20462, partial [Eragrostis curvula]	-	-	-	-	-	-	-
State 1,3,4 -vs- State 1,3,5	SK1G00049193	5	3.45949e-10	2.82725e-08	EXPB11	TVU39535.1 hypothetical protein EJB05_12959, partial [Eragrostis curvula]	-	-	-	-	-	GO:0051920//peroxiredoxin activity	GO:0055114//oxidation-reduction process
State 1,3,4 -vs- State 1,3,5	SK1G00049197	3	9.15099e-122	2.86226e-118	TIP2-1	XP_015623408.1 probable aquaporin TIP2-1 [Oryza sativa Japonica Group]	-	-	-	-	GO:0016020//membrane	GO:0015267//channel activity	GO:0055085//transmembrane transport
State 1,3,4 -vs- State 1,3,5	SK1G00049202	2	6.04734e-09	4.13648e-07	--	XP_015626243.1 uncharacterized protein LOC4330206 [Oryza sativa Japonica Group]	-	-	-	-	-	-	-
State 1,3,4 -vs- State 1,3,5	SK1G00049233	3	1.35433e-41	8.1749e-39	--	CAC39044.1 uclacyanin 3-like protein [Oryza sativa]	-	-	-	-	-	GO:0009055//electron carrier activity	GO:0006289//nucleotide-excision repair
State 1,3,4 -vs- State 1,3,5	SK1G00049256	2	5.41235e-17	9.1283e-15	GT-2	XP_025878530.1 trihelix transcription factor GTL1 isoform X1 [Oryza sativa Japonica Group]	-	-	-	-	-	-	-
State 1,3,4 -vs- State 1,3,5	SK1G00049320	2	1.12942e-46	8.44758e-44	Os02g0637000	XP_015622966.1 putative ripening-related protein 2 [Oryza sativa Japonica Group]	-	-	-	-	-	-	-
State 1,3,4 -vs- State 1,3,5	SK1G00049362	3	2.2416e-11	2.16642e-09	PIP2-2	EAY86778.1 hypothetical protein OsI_08158 [Oryza sativa Indica Group]	-	-	-	-	GO:0016020//membrane	GO:0015267//channel activity	GO:0055085//transmembrane transport
State 1,3,4 -vs- State 1,3,5	SK1G00049374	3	6.7097e-30	2.43004e-27	PAL	XP_015625125.1 phenylalanine ammonia-lyase [Oryza sativa Japonica Group]	Metabolism;Metabolism;Metabolism;Metabolism	Global and overview maps;Global and overview maps;Biosynthesis of other secondary metabolites;Amino acid metabolism	ko01100//Metabolic pathways;ko01110//Biosynthesis of secondary metabolites;ko00940//Phenylpropanoid biosynthesis;ko00360//Phenylalanine metabolism	K10775;K10775;K10775;K10775	-	GO:0004397//histidine ammonia-lyase activity;GO:0016841//ammonia-lyase activity;GO:0050368//tyrosine 2,3-aminomutase activity	GO:0006548//histidine catabolic process;GO:0009058//biosynthetic process;GO:0009698//phenylpropanoid metabolic process
State 1,3,4 -vs- State 1,3,5	SK1G00049378	5	6.37479e-15	8.84399e-13	ADK2	AAO72629.1 adenosine kinase-like protein, partial [Oryza sativa Japonica Group]	Metabolism;Metabolism	Global and overview maps;Nucleotide metabolism	ko01100//Metabolic pathways;ko00230//Purine metabolism	K00856;K00856	-	GO:0004373//glycogen (starch) synthase activity;GO:0004747//ribokinase activity;GO:0008478//pyridoxal kinase activity;GO:0008662//1-phosphofructokinase activity;GO:0009024//tagatose-6-phosphate kinase activity;GO:0016773//phosphotransferase activity, alcohol group as acceptor;GO:0047590//5-dehydro-2-deoxygluconokinase activity	GO:0005978//glycogen biosynthetic process;GO:0005990//lactose catabolic process;GO:0009244//lipopolysaccharide core region biosynthetic process;GO:0009443//pyridoxal 5'-phosphate salvage;GO:0019303//D-ribose catabolic process;GO:0019310//inositol catabolic process
State 1,3,4 -vs- State 1,3,5	SK1G00049559	3	2.28257e-38	1.26668e-35	GAPC3	XP_015625382.1 glyceraldehyde-3-phosphate dehydrogenase 3, cytosolic [Oryza sativa Japonica Group]	Metabolism;Metabolism;Metabolism;Metabolism;Metabolism;Metabolism	Global and overview maps;Global and overview maps;Global and overview maps;Global and overview maps;Carbohydrate metabolism;Energy metabolism	ko01100//Metabolic pathways;ko01110//Biosynthesis of secondary metabolites;ko01200//Carbon metabolism;ko01230//Biosynthesis of amino acids;ko00010//Glycolysis / Gluconeogenesis;ko00710//Carbon fixation in photosynthetic organisms	K00134;K00134;K00134;K00134;K00134;K00134	-	GO:0004073//aspartate-semialdehyde dehydrogenase activity;GO:0004617//phosphoglycerate dehydrogenase activity;GO:0008839//4-hydroxy-tetrahydrodipicolinate reductase;GO:0016620//oxidoreductase activity, acting on the aldehyde or oxo group of donors, NAD or NADP as acceptor;GO:0047850//diaminopimelate dehydrogenase activity;GO:0048001//erythrose-4-phosphate dehydrogenase activity;GO:0050112//inosit…	GO:0006094//gluconeogenesis;GO:0006096//glycolytic process;GO:0006564//L-serine biosynthetic process;GO:0008615//pyridoxine biosynthetic process;GO:0009085//lysine biosynthetic process;GO:0009086//methionine biosynthetic process;GO:0009088//threonine biosynthetic process;GO:0009089//lysine biosynthetic process via diaminopimelate;GO:0009097//isoleucine biosynthetic process;GO:0019310//inositol ca…
State 1,3,4 -vs- State 1,3,5	SK1G00049632	5	7.45275e-10	5.84099e-08	RPL6C	XP_015627578.1 60S ribosomal protein L6-3 [Oryza sativa Japonica Group]	Genetic Information Processing	Translation	ko03010//Ribosome	K02934	GO:0005840//ribosome	GO:0003735//structural constituent of ribosome	GO:0006412//translation
State 1,3,4 -vs- State 1,3,5	SK1G00049822	2	2.70645e-26	8.02741e-24	CLC-C	BAF09057.2 Os02g0558100, partial [Oryza sativa Japonica Group]	-	-	-	-	GO:0016020//membrane	GO:0004122//cystathionine beta-synthase activity;GO:0005247//voltage-gated chloride channel activity	GO:0006821//chloride transport;GO:0019344//cysteine biosynthetic process;GO:0055085//transmembrane transport
State 1,3,4 -vs- State 1,3,5	SK1G00049931	3	3.05865e-09	2.2062e-07	NHL1	EEE57140.1 hypothetical protein OsJ_07042 [Oryza sativa Japonica Group]	-	-	-	-	-	-	-
State 1,3,4 -vs- State 1,3,5	SK1G00050012	3	1.15648e-08	7.57902e-07	ACS	EEC73298.1 hypothetical protein OsI_07465 [Oryza sativa Indica Group]	Metabolism;Metabolism;Metabolism;Metabolism;Metabolism;Metabolism;Metabolism	Global and overview maps;Global and overview maps;Global and overview maps;Carbohydrate metabolism;Carbohydrate metabolism;Carbohydrate metabolism;Carbohydrate metabolism	ko01100//Metabolic pathways;ko01110//Biosynthesis of secondary metabolites;ko01200//Carbon metabolism;ko00010//Glycolysis / Gluconeogenesis;ko00620//Pyruvate metabolism;ko00630//Glyoxylate and dicarboxylate metabolism;ko00640//Propanoate metabolism	K01895;K01895;K01895;K01895;K01895;K01895;K01895	-	GO:0003987//acetate-CoA ligase activity;GO:0004043//L-aminoadipate-semialdehyde dehydrogenase activity;GO:0008668//(2,3-dihydroxybenzoyl)adenylate synthase activity;GO:0008756//o-succinylbenzoate-CoA ligase activity;GO:0030729//acetoacetate-CoA ligase activity;GO:0047473//D-alanine-poly(phosphoribitol) ligase activity;GO:0050218//propionate-CoA ligase activity	GO:0009234//menaquinone biosynthetic process;GO:0019287//isopentenyl diphosphate biosynthetic process, mevalonate pathway;GO:0019290//siderophore biosynthetic process;GO:0019350//teichoic acid biosynthetic process;GO:0019427//acetyl-CoA biosynthetic process from acetate;GO:0019878//lysine biosynthetic process via aminoadipic acid
State 1,3,4 -vs- State 1,3,5	SK1G00050257	5	6.3546e-09	4.33802e-07	RPS27	EAY85847.1 hypothetical protein OsI_07209 [Oryza sativa Indica Group]	Genetic Information Processing	Translation	ko03010//Ribosome	K02978	GO:0005840//ribosome	GO:0003735//structural constituent of ribosome	GO:0006412//translation
State 1,3,4 -vs- State 1,3,5	SK1G00050258	5	7.4729e-10	5.84346e-08	RPS15AA	XP_006647300.1 PREDICTED: 40S ribosomal protein S15a-1 [Oryza brachyantha]	Genetic Information Processing	Translation	ko03010//Ribosome	K02957	GO:0005840//ribosome	GO:0003735//structural constituent of ribosome	GO:0006412//translation
State 1,3,4 -vs- State 1,3,5	SK1G00050516	3	3.56026e-10	2.89584e-08	NAAT1	BAF95202.1 nicotianamine aminotransferase [Oryza sativa Japonica Group]	-	-	-	-	GO:0005737//cytoplasm	GO:0003824//catalytic activity;GO:0003961//O-acetylhomoserine aminocarboxypropyltransferase activity;GO:0004015//adenosylmethionine-8-amino-7-oxononanoate transaminase activity;GO:0004124//cysteine synthase activity;GO:0004400//histidinol-phosphate transaminase activity;GO:0004553//hydrolase activity, hydrolyzing O-glycosyl compounds;GO:0004837//tyrosine decarboxylase activity;GO:0004838//L-tyros…	GO:0000105//histidine biosynthetic process;GO:0005975//carbohydrate metabolic process;GO:0006520//cellular amino acid metabolic process;GO:0006531//aspartate metabolic process;GO:0006559//L-phenylalanine catabolic process;GO:0006572//tyrosine catabolic process;GO:0008652//cellular amino acid biosynthetic process;GO:0009058//biosynthetic process;GO:0009086//methionine biosynthetic process;GO:00091…
State 1,3,4 -vs- State 1,3,5	SK1G00050647	2	1.53624e-12	1.75019e-10	EIF1AX	XP_015623633.1 eukaryotic translation initiation factor 1A [Oryza sativa Japonica Group]	Genetic Information Processing	Translation	ko03013//RNA transport	K03236	-	GO:0003723//RNA binding;GO:0003743//translation initiation factor activity	GO:0006413//translational initiation
State 1,3,4 -vs- State 1,3,5	SK1G00050651	2	8.5896e-31	3.3206e-28	SWEET4	XP_015626955.1 bidirectional sugar transporter SWEET4 [Oryza sativa Japonica Group]	-	-	-	-	GO:0016021//integral component of membrane	-	GO:0006488//dolichol-linked oligosaccharide biosynthetic process
State 1,3,4 -vs- State 1,3,5	SK1G00050788	2	3.58602e-14	4.74541e-12	UBC5B	EAY85278.1 hypothetical protein OsI_06649 [Oryza sativa Indica Group]	Genetic Information Processing;Genetic Information Processing	Folding, sorting and degradation;Folding, sorting and degradation	ko04141//Protein processing in endoplasmic reticulum;ko04120//Ubiquitin mediated proteolysis	K06689;K06689	-	GO:0005515//protein binding	GO:0006464//cellular protein modification process;GO:0015031//protein transport
State 1,3,4 -vs- State 1,3,5	SK1G00050880	3	1.26287e-17	2.28686e-15	PEPC	EEC72817.1 hypothetical protein OsI_06526 [Oryza sativa Indica Group]	Metabolism;Metabolism;Metabolism;Metabolism	Global and overview maps;Global and overview maps;Carbohydrate metabolism;Energy metabolism	ko01100//Metabolic pathways;ko01200//Carbon metabolism;ko00620//Pyruvate metabolism;ko00710//Carbon fixation in photosynthetic organisms	K01595;K01595;K01595;K01595	-	GO:0008964//phosphoenolpyruvate carboxylase activity	GO:0006099//tricarboxylic acid cycle;GO:0015977//carbon fixation
State 1,3,4 -vs- State 1,3,5	SK1G00050982	5	4.04932e-14	5.29737e-12	RPS24A	XP_015623021.1 40S ribosomal protein S24-1 [Oryza sativa Japonica Group]	Genetic Information Processing	Translation	ko03010//Ribosome	K02974	GO:0005840//ribosome	GO:0003735//structural constituent of ribosome;GO:0005085//guanyl-nucleotide exchange factor activity	GO:0006412//translation
State 1,3,4 -vs- State 1,3,5	SK1G00051026	2	2.90705e-16	4.52579e-14	PER52	XP_004951347.2 peroxidase 52 [Setaria italica]	Metabolism;Metabolism;Metabolism	Global and overview maps;Global and overview maps;Biosynthesis of other secondary metabolites	ko01100//Metabolic pathways;ko01110//Biosynthesis of secondary metabolites;ko00940//Phenylpropanoid biosynthesis	K00430;K00430;K00430	-	GO:0004601//peroxidase activity;GO:0020037//heme binding	GO:0006979//response to oxidative stress;GO:0055114//oxidation-reduction process
State 1,3,4 -vs- State 1,3,5	SK1G00051170	2	1.65051e-10	1.43041e-08	--	EAY84862.1 hypothetical protein OsI_06226 [Oryza sativa Indica Group]	-	-	-	-	-	-	-
State 1,3,4 -vs- State 1,3,5	SK1G00051241	2	8.49789e-11	7.73487e-09	--	XP_025879076.1 uncharacterized protein LOC9266462 isoform X4 [Oryza sativa Japonica Group]	-	-	-	-	-	-	-
State 1,3,4 -vs- State 1,3,5	SK1G00051282	1	3.56156e-17	6.252e-15	GGP5	EAY84723.1 hypothetical protein OsI_06091 [Oryza sativa Indica Group]	-	-	-	-	GO:0005951//carbamoyl-phosphate synthase complex	GO:0000107//imidazoleglycerol-phosphate synthase activity;GO:0003824//catalytic activity;GO:0003922//GMP synthase (glutamine-hydrolyzing) activity;GO:0004088//carbamoyl-phosphate synthase (glutamine-hydrolyzing) activity;GO:0004642//phosphoribosylformylglycinamidine synthase activity;GO:0008234//cysteine-type peptidase activity;GO:0016787//hydrolase activity;GO:0016884//carbon-nitrogen ligase act…	GO:0000105//histidine biosynthetic process;GO:0006177//GMP biosynthetic process;GO:0006508//proteolysis;GO:0009152//purine ribonucleotide biosynthetic process;GO:0009220//pyrimidine ribonucleotide biosynthetic process;GO:0042823//pyridoxal phosphate biosynthetic process
State 1,3,4 -vs- State 1,3,5	SK1G00051340	3	2.61031e-13	3.18476e-11	CAD2	XP_015626408.1 cinnamyl alcohol dehydrogenase 2 [Oryza sativa Japonica Group]	Metabolism;Metabolism;Metabolism	Global and overview maps;Global and overview maps;Biosynthesis of other secondary metabolites	ko01100//Metabolic pathways;ko01110//Biosynthesis of secondary metabolites;ko00940//Phenylpropanoid biosynthesis	K00083;K00083;K00083	-	GO:0004024//alcohol dehydrogenase activity, zinc-dependent;GO:0008270//zinc ion binding;GO:0008743//L-threonine 3-dehydrogenase activity;GO:0016491//oxidoreductase activity;GO:0016655//oxidoreductase activity, acting on NAD(P)H, quinone or similar compound as acceptor;GO:0018467//formaldehyde dehydrogenase activity;GO:0050607//mycothiol-dependent formaldehyde dehydrogenase activity;GO:0051287//NA…	GO:0002376//immune system process;GO:0006113//fermentation;GO:0006567//threonine catabolic process;GO:0008152//metabolic process;GO:0009404//toxin metabolic process;GO:0010127//mycothiol-dependent detoxification;GO:0019439//aromatic compound catabolic process;GO:0030494//bacteriochlorophyll biosynthetic process;GO:0046292//formaldehyde metabolic process;GO:0055114//oxidation-reduction process
State 1,3,4 -vs- State 1,3,5	SK1G00051401	5	1.09418e-08	7.21148e-07	RPS14C	KAF0934247.1 hypothetical protein E2562_023609 [Oryza meyeriana var. granulata] [Oryza meyeriana]	Genetic Information Processing	Translation	ko03010//Ribosome	K02955	GO:0005840//ribosome;GO:0022627//cytosolic small ribosomal subunit	GO:0003735//structural constituent of ribosome;GO:2001070//starch binding	GO:0006412//translation
State 1,3,4 -vs- State 1,3,5	SK1G00051444	3	1.18106e-08	7.71606e-07	PGK3	XP_015625860.1 phosphoglycerate kinase, cytosolic [Oryza sativa Japonica Group]	Metabolism;Metabolism;Metabolism;Metabolism;Metabolism;Metabolism	Global and overview maps;Global and overview maps;Global and overview maps;Global and overview maps;Carbohydrate metabolism;Energy metabolism	ko01100//Metabolic pathways;ko01110//Biosynthesis of secondary metabolites;ko01200//Carbon metabolism;ko01230//Biosynthesis of amino acids;ko00010//Glycolysis / Gluconeogenesis;ko00710//Carbon fixation in photosynthetic organisms	K00927;K00927;K00927;K00927;K00927;K00927	GO:0005737//cytoplasm	GO:0004616//phosphogluconate dehydrogenase (decarboxylating) activity;GO:0004618//phosphoglycerate kinase activity;GO:0050415//formimidoylglutamase activity	GO:0006096//glycolytic process;GO:0006098//pentose-phosphate shunt;GO:0019556//histidine catabolic process to glutamate and formamide
State 1,3,4 -vs- State 1,3,5	SK1G00051449	3	1.18492e-08	7.72127e-07	--	CAE05289.2 OSJNBa0084N21.7 [Oryza sativa Japonica Group]	-	-	-	-	-	-	-
State 1,3,4 -vs- State 1,3,5	SK1G00051490	1	2.91604e-10	2.43517e-08	Os02g0139700	XP_015625479.2 cycloartenol synthase isoform X1 [Oryza sativa Japonica Group]	Metabolism;Metabolism;Metabolism	Global and overview maps;Global and overview maps;Lipid metabolism	ko01100//Metabolic pathways;ko01110//Biosynthesis of secondary metabolites;ko00100//Steroid biosynthesis	K01853;K01853;K01853	-	GO:0003824//catalytic activity;GO:0034073//tetrahymanol cyclase activity;GO:0051007//squalene-hopene cyclase activity	GO:0016114//terpenoid biosynthetic process;GO:0019746//hopanoid biosynthetic process
State 1,3,4 -vs- State 1,3,5	SK1G00051638	2	3.25738e-10	2.68118e-08	BI1	XP_015625700.1 bax inhibitor 1 [Oryza sativa Japonica Group]	-	-	-	-	-	-	-
State 1,3,4 -vs- State 1,3,5	SK1G00051841	2	2.156e-145	1.0597e-141	CBP3	XP_015626272.1 serine carboxypeptidase 3 [Oryza sativa Japonica Group]	-	-	-	-	-	GO:0004185//serine-type carboxypeptidase activity	GO:0006508//proteolysis
State 1,3,4 -vs- State 1,3,5	SK1G00051977	5	3.14675e-09	2.25088e-07	--	TVT96702.1 hypothetical protein EJB05_58101 [Eragrostis curvula]	-	-	-	-	GO:0000276//mitochondrial proton-transporting ATP synthase complex, coupling factor F(o)	GO:0015078//hydrogen ion transmembrane transporter activity	GO:0015986//ATP synthesis coupled proton transport
State 1,3,4 -vs- State 1,3,5	SK1G00052077	3	1.48947e-10	1.30026e-08	--	EEC76713.1 hypothetical protein OsI_14727 [Oryza sativa Indica Group]	-	-	-	-	GO:0005801//cis-Golgi network;GO:0016020//membrane	GO:0005524//ATP binding	GO:0006886//intracellular protein transport;GO:0007059//chromosome segregation;GO:0030261//chromosome condensation
State 1,3,4 -vs- State 1,3,5	SK1G00052169	3	3.67113e-09	2.58998e-07	CAS2	AAV48542.1 beta-cyanoalanine synthase [Oryza sativa Indica Group]	Metabolism;Metabolism;Metabolism;Metabolism;Metabolism;Metabolism;Metabolism	Global and overview maps;Global and overview maps;Global and overview maps;Global and overview maps;Amino acid metabolism;Metabolism of other amino acids;Energy metabolism	ko01100//Metabolic pathways;ko01110//Biosynthesis of secondary metabolites;ko01200//Carbon metabolism;ko01230//Biosynthesis of amino acids;ko00270//Cysteine and methionine metabolism;ko00460//Cyanoamino acid metabolism;ko00920//Sulfur metabolism	K13034;K13034;K13034;K13034;K13034;K13034;K13034	-	GO:0004122//cystathionine beta-synthase activity;GO:0004124//cysteine synthase activity;GO:0004794//L-threonine ammonia-lyase activity;GO:0008838//diaminopropionate ammonia-lyase activity;GO:0030170//pyridoxal phosphate binding	GO:0006535//cysteine biosynthetic process from serine;GO:0006549//isoleucine metabolic process;GO:0008152//metabolic process;GO:0009058//biosynthetic process;GO:0009097//isoleucine biosynthetic process;GO:0019344//cysteine biosynthetic process;GO:0042400//ectoine catabolic process
State 1,3,4 -vs- State 1,3,5	SK1G00052423	2	1.49094e-12	1.70423e-10	BURP5	EAY93151.1 hypothetical protein OsI_14957 [Oryza sativa Indica Group]	-	-	-	-	GO:0005576//extracellular region	-	GO:0042381//hemolymph coagulation
State 1,3,4 -vs- State 1,3,5	SK1G00052618	2	2.44625e-13	2.99522e-11	udkC	KAF2933170.1 hypothetical protein DAI22_04g061200 [Oryza sativa Japonica Group]	-	-	-	-	GO:0005737//cytoplasm;GO:0009360//DNA polymerase III complex;GO:0009368//endopeptidase Clp complex;GO:0009379//Holliday junction helicase complex	GO:0000309//nicotinamide-nucleotide adenylyltransferase activity;GO:0003723//RNA binding;GO:0003724//RNA helicase activity;GO:0003824//catalytic activity;GO:0003887//DNA-directed DNA polymerase activity;GO:0003924//GTPase activity;GO:0004020//adenylylsulfate kinase activity;GO:0004127//cytidylate kinase activity;GO:0004140//dephospho-CoA kinase activity;GO:0004176//ATP-dependent peptidase activit…	GO:0001887//selenium compound metabolic process;GO:0002949//tRNA threonylcarbamoyladenosine modification;GO:0006139//nucleobase-containing compound metabolic process;GO:0006260//DNA replication;GO:0006310//DNA recombination;GO:0006400//tRNA modification;GO:0006508//proteolysis;GO:0006614//SRP-dependent cotranslational protein targeting to membrane;GO:0006777//Mo-molybdopterin cofactor biosyntheti…
State 1,3,4 -vs- State 1,3,5	SK1G00052770	2	2.13017e-145	1.0597e-141	CCP1	XP_015636152.1 cysteine proteinase 1 [Oryza sativa Japonica Group]	Organismal Systems	Environmental adaptation	ko04626//Plant-pathogen interaction	K01373	-	GO:0008234//cysteine-type peptidase activity	GO:0006508//proteolysis
State 1,3,4 -vs- State 1,3,5	SK1G00052813	2	3.05176e-19	6.28736e-17	HCAR	XP_015636783.1 7-hydroxymethyl chlorophyll a reductase, chloroplastic-like isoform X1 [Oryza sativa Japonica Group]	Metabolism;Metabolism;Metabolism	Global and overview maps;Global and overview maps;Metabolism of cofactors and vitamins	ko01100//Metabolic pathways;ko01110//Biosynthesis of secondary metabolites;ko00860//Porphyrin and chlorophyll metabolism	K18010;K18010;K18010	-	-	-
State 1,3,4 -vs- State 1,3,5	SK1G00052936	2	8.88642e-69	1.0543e-65	OsI_014908	EAY93675.1 hypothetical protein OsI_15462 [Oryza sativa Indica Group]	-	-	-	-	-	GO:0004869//cysteine-type endopeptidase inhibitor activity	-
State 1,3,4 -vs- State 1,3,5	SK1G00053059	5	1.56823e-09	1.17042e-07	RPL35	XP_006653313.2 PREDICTED: 60S ribosomal protein L35 [Oryza brachyantha]	Genetic Information Processing	Translation	ko03010//Ribosome	K02918	GO:0000315//organellar large ribosomal subunit;GO:0005840//ribosome;GO:0022625//cytosolic large ribosomal subunit	GO:0003735//structural constituent of ribosome	GO:0006412//translation
State 1,3,4 -vs- State 1,3,5	SK1G00053152	2	1.34075e-09	1.01384e-07	YSL6	BAE91886.1 hypothetical protein [Oryza sativa Japonica Group]	-	-	-	-	GO:0016020//membrane	GO:0015198//oligopeptide transporter activity	GO:0006857//oligopeptide transport;GO:0055085//transmembrane transport
State 1,3,4 -vs- State 1,3,5	SK1G00053273	2	1.91058e-09	1.40761e-07	At2g27500	CAH67163.1 H0717B12.10 [Oryza sativa]	-	-	-	-	-	GO:0004553//hydrolase activity, hydrolyzing O-glycosyl compounds;GO:0015926//glucosidase activity	GO:0005975//carbohydrate metabolic process
State 1,3,4 -vs- State 1,3,5	SK1G00053306	5	2.52658e-14	3.409e-12	NHL1	XP_015633930.1 NDR1/HIN1-like protein 12 [Oryza sativa Japonica Group]	-	-	-	-	-	-	-
State 1,3,4 -vs- State 1,3,5	SK1G00053349	3	1.55825e-55	1.48926e-52	PER72	EAY94133.1 hypothetical protein OsI_15906 [Oryza sativa Indica Group]	Metabolism;Metabolism;Metabolism	Global and overview maps;Global and overview maps;Biosynthesis of other secondary metabolites	ko01100//Metabolic pathways;ko01110//Biosynthesis of secondary metabolites;ko00940//Phenylpropanoid biosynthesis	K00430;K00430;K00430	-	GO:0004601//peroxidase activity;GO:0020037//heme binding	GO:0006979//response to oxidative stress;GO:0055114//oxidation-reduction process
State 1,3,4 -vs- State 1,3,5	SK1G00053370	5	7.15908e-20	1.54915e-17	RPS10-1	KAF0893826.1 hypothetical protein E2562_029710 [Oryza meyeriana var. granulata] [Oryza meyeriana]	Genetic Information Processing	Translation	ko03010//Ribosome	K02947	-	-	-
State 1,3,4 -vs- State 1,3,5	SK1G00053390	5	1.45254e-12	1.66587e-10	PCMP-H81	XP_015636986.1 pentatricopeptide repeat-containing protein At4g02750 [Oryza sativa Japonica Group]	-	-	-	-	GO:0005643//nuclear pore;GO:0030964//NADH dehydrogenase complex	GO:0008270//zinc ion binding;GO:0017056//structural constituent of nuclear pore;GO:0042802//identical protein binding;GO:0050136//NADH dehydrogenase (quinone) activity	GO:0042981//regulation of apoptotic process;GO:0055114//oxidation-reduction process
State 1,3,4 -vs- State 1,3,5	SK1G00053433	2	1.94919e-13	2.39514e-11	--	XP_015636088.1 uncharacterized protein LOC4335922 [Oryza sativa Japonica Group]	-	-	-	-	-	-	-
State 1,3,4 -vs- State 1,3,5	SK1G00053454	2	1.61303e-16	2.58131e-14	CLC-C	BAB97267.1 chloride channel [Oryza sativa Japonica Group]	-	-	-	-	GO:0016020//membrane	GO:0004122//cystathionine beta-synthase activity;GO:0005247//voltage-gated chloride channel activity	GO:0006821//chloride transport;GO:0019344//cysteine biosynthetic process;GO:0055085//transmembrane transport
State 1,3,4 -vs- State 1,3,5	SK1G00053480	2	3.09465e-10	2.56565e-08	--	CAH67237.1 OSIGBa0140O07.5 [Oryza sativa]	-	-	-	-	-	GO:0004857//enzyme inhibitor activity	-
State 1,3,4 -vs- State 1,3,5	SK1G00053499	2	1.8077e-28	6.03841e-26	GAD4	XP_015633915.1 glutamate decarboxylase 4 [Oryza sativa Japonica Group]	Metabolism;Metabolism;Metabolism;Metabolism;Metabolism;Metabolism	Global and overview maps;Global and overview maps;Amino acid metabolism;Metabolism of other amino acids;Carbohydrate metabolism;Metabolism of other amino acids	ko01100//Metabolic pathways;ko01110//Biosynthesis of secondary metabolites;ko00250//Alanine, aspartate and glutamate metabolism;ko00410//beta-Alanine metabolism;ko00650//Butanoate metabolism;ko00430//Taurine and hypotaurine metabolism	K01580;K01580;K01580;K01580;K01580;K01580	-	GO:0004351//glutamate decarboxylase activity;GO:0004837//tyrosine decarboxylase activity;GO:0016831//carboxy-lyase activity;GO:0030170//pyridoxal phosphate binding	GO:0006540//glutamate decarboxylation to succinate;GO:0019752//carboxylic acid metabolic process;GO:0051188//cofactor biosynthetic process
State 1,3,4 -vs- State 1,3,5	SK1G00053521	2	3.63004e-12	3.97755e-10	--	XP_015636435.1 FK506-binding protein 2 [Oryza sativa Japonica Group]	-	-	-	-	GO:0005869//dynactin complex	GO:0003779//actin binding;GO:0034290//holin activity	GO:0006355//regulation of transcription, DNA-templated;GO:0009405//pathogenesis;GO:0061640//cytoskeleton-dependent cytokinesis
State 1,3,4 -vs- State 1,3,5	SK1G00053669	2	3.95154e-09	2.76335e-07	--	XP_015633624.1 uncharacterized protein LOC4336124 isoform X1 [Oryza sativa Japonica Group]	-	-	-	-	GO:0005577//fibrinogen complex;GO:0039679//viral occlusion body	GO:0005102//receptor binding	GO:0030168//platelet activation;GO:0051258//protein polymerization
State 1,3,4 -vs- State 1,3,5	SK1G00053778	5	1.1425e-17	2.07984e-15	GAPC2	XP_015635626.1 glyceraldehyde-3-phosphate dehydrogenase 2, cytosolic [Oryza sativa Japonica Group]	Metabolism;Metabolism;Metabolism;Metabolism;Metabolism;Metabolism	Global and overview maps;Global and overview maps;Global and overview maps;Global and overview maps;Carbohydrate metabolism;Energy metabolism	ko01100//Metabolic pathways;ko01110//Biosynthesis of secondary metabolites;ko01200//Carbon metabolism;ko01230//Biosynthesis of amino acids;ko00010//Glycolysis / Gluconeogenesis;ko00710//Carbon fixation in photosynthetic organisms	K00134;K00134;K00134;K00134;K00134;K00134	-	GO:0004073//aspartate-semialdehyde dehydrogenase activity;GO:0004617//phosphoglycerate dehydrogenase activity;GO:0008839//4-hydroxy-tetrahydrodipicolinate reductase;GO:0016620//oxidoreductase activity, acting on the aldehyde or oxo group of donors, NAD or NADP as acceptor;GO:0047850//diaminopimelate dehydrogenase activity;GO:0048001//erythrose-4-phosphate dehydrogenase activity;GO:0050112//inosit…	GO:0006094//gluconeogenesis;GO:0006096//glycolytic process;GO:0006564//L-serine biosynthetic process;GO:0008615//pyridoxine biosynthetic process;GO:0009085//lysine biosynthetic process;GO:0009086//methionine biosynthetic process;GO:0009088//threonine biosynthetic process;GO:0009089//lysine biosynthetic process via diaminopimelate;GO:0009097//isoleucine biosynthetic process;GO:0019310//inositol ca…
State 1,3,4 -vs- State 1,3,5	SK1G00053817	2	1.88716e-12	2.11497e-10	METTL18	CAH67536.1 H0425E08.4 [Oryza sativa]	-	-	-	-	-	GO:0008168//methyltransferase activity;GO:0008171//O-methyltransferase activity;GO:0008689//3-demethylubiquinone-9 3-O-methyltransferase activity;GO:0008757//S-adenosylmethionine-dependent methyltransferase activity;GO:0016667//oxidoreductase activity, acting on a sulfur group of donors;GO:0052913//16S rRNA (guanine(966)-N(2))-methyltransferase activity	GO:0006464//cellular protein modification process;GO:0006744//ubiquinone biosynthetic process;GO:0006790//sulfur compound metabolic process;GO:0009102//biotin biosynthetic process;GO:0031167//rRNA methylation
State 1,3,4 -vs- State 1,3,5	SK1G00053851	2	1.14883e-11	1.15238e-09	DBR	XP_015633645.1 2-alkenal reductase (NADP(+)-dependent) [Oryza sativa Japonica Group]	-	-	-	-	-	GO:0008743//L-threonine 3-dehydrogenase activity;GO:0016655//oxidoreductase activity, acting on NAD(P)H, quinone or similar compound as acceptor	GO:0006567//threonine catabolic process;GO:0008152//metabolic process;GO:0055114//oxidation-reduction process
State 1,3,4 -vs- State 1,3,5	SK1G00053880	5	9.22912e-09	6.15382e-07	RPL23A	EAY94740.1 hypothetical protein OsI_16517 [Oryza sativa Indica Group]	Genetic Information Processing	Translation	ko03010//Ribosome	K02893	GO:0005840//ribosome;GO:0022625//cytosolic large ribosomal subunit	GO:0003735//structural constituent of ribosome	GO:0006412//translation
State 1,3,4 -vs- State 1,3,5	SK1G00053910	2	3.52411e-09	2.5035e-07	UGT92A1	XP_015636212.1 LOW QUALITY PROTEIN: probable leucine-rich repeat receptor-like protein kinase At5g63930 [Oryza sativa Japonica Group]	-	-	-	-	-	GO:0004672//protein kinase activity;GO:0005515//protein binding;GO:0005524//ATP binding;GO:0008194//UDP-glycosyltransferase activity	GO:0006468//protein phosphorylation
State 1,3,4 -vs- State 1,3,5	SK1G00053915	2	9.59979e-10	7.37255e-08	--	CAH67333.1 OSIGBa0157A06.2 [Oryza sativa]	-	-	-	-	-	-	-
State 1,3,4 -vs- State 1,3,5	SK1G00053928	3	2.09062e-11	2.03768e-09	GRXC6	XP_015637105.1 glutaredoxin-C6 [Oryza sativa Japonica Group]	-	-	-	-	-	GO:0005515//protein binding;GO:0009055//electron carrier activity;GO:0015035//protein disulfide oxidoreductase activity;GO:0015036//disulfide oxidoreductase activity;GO:0016491//oxidoreductase activity	GO:0006749//glutathione metabolic process;GO:0006790//sulfur compound metabolic process;GO:0031047//gene silencing by RNA;GO:0042965//glutaredoxin biosynthetic process;GO:0045454//cell redox homeostasis;GO:0055114//oxidation-reduction process
State 1,3,4 -vs- State 1,3,5	SK1G00053949	2	1.07635e-22	2.62644e-20	PXG	XP_015633789.1 peroxygenase [Oryza sativa Japonica Group]	Metabolism	Lipid metabolism	ko00073//Cutin, suberine and wax biosynthesis	K17991	-	-	-
State 1,3,4 -vs- State 1,3,5	SK1G00053962	2	1.14792e-11	1.15238e-09	At1g12290	BAS90069.1 Os04g0514600 [Oryza sativa Japonica Group]	Organismal Systems	Environmental adaptation	ko04626//Plant-pathogen interaction	K13459	GO:0005575//cellular_component;GO:0005887//integral component of plasma membrane;GO:0009898//cytoplasmic side of plasma membrane;GO:0030257//type III protein secretion system complex;GO:0055052//ATP-binding cassette (ABC) transporter complex, substrate-binding subunit-containing	GO:0003677//DNA binding;GO:0003688//DNA replication origin binding;GO:0003723//RNA binding;GO:0003724//RNA helicase activity;GO:0003924//GTPase activity;GO:0005524//ATP binding;GO:0005525//GTP binding;GO:0015415//phosphate ion transmembrane-transporting ATPase activity;GO:0015416//organic phosphonate transmembrane-transporting ATPase activity;GO:0016301//kinase activity;GO:0016772//transferase ac…	GO:0006270//DNA replication initiation;GO:0006275//regulation of DNA replication;GO:0006817//phosphate ion transport;GO:0008150//biological_process;GO:0009405//pathogenesis;GO:0015716//organic phosphonate transport;GO:0015809//arginine transport;GO:0015819//lysine transport;GO:0015822//ornithine transport;GO:0030254//protein secretion by the type III secretion system;GO:0032297//negative regulati…
State 1,3,4 -vs- State 1,3,5	SK1G00053966	2	1.6718e-60	1.69177e-57	NAC054	XP_015634235.1 protein CUP-SHAPED COTYLEDON 1 [Oryza sativa Japonica Group]	-	-	-	-	-	GO:0003677//DNA binding	GO:0006355//regulation of transcription, DNA-templated
State 1,3,4 -vs- State 1,3,5	SK1G00053967	1	9.92943e-15	1.36653e-12	IVR1	XP_015636934.1 beta-fructofuranosidase 1 [Oryza sativa Japonica Group]	Metabolism;Metabolism;Metabolism;Metabolism	Global and overview maps;Global and overview maps;Carbohydrate metabolism;Carbohydrate metabolism	ko01100//Metabolic pathways;ko01110//Biosynthesis of secondary metabolites;ko00500//Starch and sucrose metabolism;ko00052//Galactose metabolism	K01193;K01193;K01193;K01193	-	GO:0004564//beta-fructofuranosidase activity;GO:0004575//sucrose alpha-glucosidase activity	-
State 1,3,4 -vs- State 1,3,5	SK1G00053991	2	5.9126e-24	1.51813e-21	SALR	XP_015635605.1 salutaridine reductase [Oryza sativa Japonica Group]	Metabolism;Metabolism	Global and overview maps;Metabolism of terpenoids and polyketides	ko01110//Biosynthesis of secondary metabolites;ko00902//Monoterpenoid biosynthesis	K15095;K15095	-	GO:0003824//catalytic activity;GO:0004316//3-oxoacyl-[acyl-carrier-protein] reductase (NADPH) activity;GO:0004757//sepiapterin reductase activity;GO:0008667//2,3-dihydro-2,3-dihydroxybenzoate dehydrogenase activity;GO:0008678//2-deoxy-D-gluconate 3-dehydrogenase activity;GO:0016491//oxidoreductase activity;GO:0016630//protochlorophyllide reductase activity;GO:0050662//coenzyme binding;GO:0051287/…	GO:0000272//polysaccharide catabolic process;GO:0006633//fatty acid biosynthetic process;GO:0006729//tetrahydrobiopterin biosynthetic process;GO:0015995//chlorophyll biosynthetic process;GO:0055114//oxidation-reduction process
State 1,3,4 -vs- State 1,3,5	SK1G00054064	3	8.34025e-12	8.61726e-10	PIP2-3	XP_015633686.1 probable aquaporin PIP2-3 [Oryza sativa Japonica Group]	-	-	-	-	GO:0016020//membrane	GO:0015267//channel activity	GO:0055085//transmembrane transport
State 1,3,4 -vs- State 1,3,5	SK1G00054079	3	2.49158e-10	2.10111e-08	PAL	XP_015635507.1 phenylalanine ammonia-lyase-like [Oryza sativa Japonica Group]	Metabolism;Metabolism;Metabolism;Metabolism	Global and overview maps;Global and overview maps;Biosynthesis of other secondary metabolites;Amino acid metabolism	ko01100//Metabolic pathways;ko01110//Biosynthesis of secondary metabolites;ko00940//Phenylpropanoid biosynthesis;ko00360//Phenylalanine metabolism	K13064;K13064;K13064;K13064	-	GO:0004397//histidine ammonia-lyase activity;GO:0016841//ammonia-lyase activity;GO:0050368//tyrosine 2,3-aminomutase activity	GO:0006548//histidine catabolic process;GO:0009058//biosynthetic process;GO:0009698//phenylpropanoid metabolic process
State 1,3,4 -vs- State 1,3,5	SK1G00016068	2	2.11581e-12	2.34827e-10	EXPB5	OEL36486.1 Expansin-B15 [Dichanthelium oligosanthes]	-	-	-	-	-	GO:0051920//peroxiredoxin activity	GO:0055114//oxidation-reduction process
State 1,3,4 -vs- State 1,3,5	SK1G00054138	1	8.7201e-09	5.8257e-07	NUDT8	CAH67611.1 OSIGBa0106P14.1 [Oryza sativa]	-	-	-	-	-	GO:0016787//hydrolase activity;GO:0016818//hydrolase activity, acting on acid anhydrides, in phosphorus-containing anhydrides	GO:0006281//DNA repair
State 1,3,4 -vs- State 1,3,5	SK1G00054162	2	2.36974e-33	1.03207e-30	GDH2	XP_015637000.1 glutamate dehydrogenase 2, mitochondrial [Oryza sativa Japonica Group]	Metabolism;Metabolism;Metabolism;Metabolism;Metabolism	Global and overview maps;Global and overview maps;Amino acid metabolism;Amino acid metabolism;Energy metabolism	ko01100//Metabolic pathways;ko01200//Carbon metabolism;ko00250//Alanine, aspartate and glutamate metabolism;ko00220//Arginine biosynthesis;ko00910//Nitrogen metabolism	K00261;K00261;K00261;K00261;K00261	GO:0005737//cytoplasm	GO:0016491//oxidoreductase activity;GO:0051287//NAD binding	GO:0006520//cellular amino acid metabolic process;GO:0008652//cellular amino acid biosynthetic process;GO:0055114//oxidation-reduction process
State 1,3,4 -vs- State 1,3,5	SK1G00054279	3	2.41808e-18	4.57124e-16	PIP1-2	XP_015635466.1 probable aquaporin PIP1-2 [Oryza sativa Japonica Group]	-	-	-	-	GO:0016020//membrane	GO:0015267//channel activity	GO:0055085//transmembrane transport
State 1,3,4 -vs- State 1,3,5	SK1G00054293	4	6.12582e-11	5.66572e-09	LC	AAC49219.1 Ra [Oryza sativa]	-	-	-	-	-	GO:0046983//protein dimerization activity	-
State 1,3,4 -vs- State 1,3,5	SK1G00054309	2	1.60162e-09	1.19274e-07	At3g47420	EAY95115.1 hypothetical protein OsI_16932 [Oryza sativa Indica Group]	-	-	-	-	GO:0005887//integral component of plasma membrane;GO:0016021//integral component of membrane	GO:0015169//glycerol-3-phosphate transmembrane transporter activity;GO:0015514//nitrite efflux transmembrane transporter activity;GO:0022857//transmembrane transporter activity;GO:0042910//xenobiotic transporter activity	GO:0015707//nitrite transport;GO:0015794//glycerol-3-phosphate transport;GO:0042908//xenobiotic transport;GO:0055085//transmembrane transport
State 1,3,4 -vs- State 1,3,5	SK1G00054421	2	6.85381e-19	1.35524e-16	XTH8	XP_015634186.1 xyloglucan endotransglycosylase/hydrolase protein 8-like [Oryza sativa Japonica Group]	Environmental Information Processing	Signal transduction	ko04075//Plant hormone signal transduction	K14504	GO:0005618//cell wall;GO:0048046//apoplast	GO:0004553//hydrolase activity, hydrolyzing O-glycosyl compounds;GO:0016762//xyloglucan:xyloglucosyl transferase activity	GO:0005975//carbohydrate metabolic process;GO:0006073//cellular glucan metabolic process
State 1,3,4 -vs- State 1,3,5	SK1G00054550	2	1.98937e-09	1.45941e-07	NAC021	KAF2935889.1 hypothetical protein DAI22_04g264000 [Oryza sativa Japonica Group]	-	-	-	-	-	GO:0003677//DNA binding	GO:0006355//regulation of transcription, DNA-templated;GO:0042981//regulation of apoptotic process
State 1,3,4 -vs- State 1,3,5	SK1G00054575	3	2.67808e-17	4.79907e-15	--	-	-	-	-	-	-	-	-
State 1,3,4 -vs- State 1,3,5	SK1G00054576	2	1.39409e-16	2.27323e-14	LCAT4	XP_015636267.1 lecithin-cholesterol acyltransferase-like 4 [Oryza sativa Japonica Group]	Metabolism;Metabolism;Metabolism;Metabolism	Global and overview maps;Global and overview maps;Lipid metabolism;Lipid metabolism	ko01100//Metabolic pathways;ko01110//Biosynthesis of secondary metabolites;ko00564//Glycerophospholipid metabolism;ko00592//alpha-Linolenic acid metabolism	K22389;K22389;K22389;K22389	-	GO:0008374//O-acyltransferase activity;GO:0016787//hydrolase activity;GO:0016788//hydrolase activity, acting on ester bonds	GO:0006629//lipid metabolic process;GO:0016042//lipid catabolic process
State 1,3,4 -vs- State 1,3,5	SK1G00054579	2	1.0291e-10	9.29319e-09	--	XP_015635616.1 myosin-10 isoform X2 [Oryza sativa Japonica Group]	-	-	-	-	-	GO:0005524//ATP binding	GO:0007059//chromosome segregation;GO:0030261//chromosome condensation
State 1,3,4 -vs- State 1,3,5	SK1G00054599	2	4.5986e-46	3.36637e-43	TPRP-F1	EAY95514.1 hypothetical protein OsI_17360 [Oryza sativa Indica Group]	-	-	-	-	-	-	-
State 1,3,4 -vs- State 1,3,5	SK1G00054673	2	2.63672e-30	9.75472e-28	ENDO1	XP_025880525.1 endonuclease 1 [Oryza sativa Japonica Group]	-	-	-	-	-	GO:0003676//nucleic acid binding;GO:0004519//endonuclease activity	GO:0006308//DNA catabolic process
State 1,3,4 -vs- State 1,3,5	SK1G00054695	2	1.46915e-09	1.10366e-07	B120	CAJ86025.1 B0808H03.2 [Oryza sativa]	-	-	-	-	-	GO:0003674//molecular_function;GO:0004672//protein kinase activity;GO:0004674//protein serine/threonine kinase activity;GO:0005524//ATP binding	GO:0006468//protein phosphorylation;GO:0030436//asexual sporulation;GO:0048544//recognition of pollen
State 1,3,4 -vs- State 1,3,5	SK1G00054751	2	5.5664e-18	1.02966e-15	ATG8B	XP_015637094.1 autophagy-related protein 8B [Oryza sativa Japonica Group]	Cellular Processes	Transport and catabolism	ko04136//Autophagy - other eukaryotes	K08341	GO:0005737//cytoplasm	-	GO:0000045//autophagosome assembly
State 1,3,4 -vs- State 1,3,5	SK1G00054769	1	6.73734e-23	1.67975e-20	CRK25	XP_015635326.1 cysteine-rich receptor-like protein kinase 6 [Oryza sativa Japonica Group]	-	-	-	-	-	-	-
State 1,3,4 -vs- State 1,3,5	SK1G00054811	3	8.2201e-10	6.39866e-08	TIFY3	BAS91385.1 Os04g0653000, partial [Oryza sativa Japonica Group]	Environmental Information Processing	Signal transduction	ko04075//Plant hormone signal transduction	K13464	-	GO:0043814//phospholactate guanylyltransferase activity	GO:0009108//coenzyme biosynthetic process
State 1,3,4 -vs- State 1,3,5	SK1G00054813	2	5.34292e-20	1.18599e-17	ENDO2	EEC78151.1 hypothetical protein OsI_17711 [Oryza sativa Indica Group]	-	-	-	-	-	GO:0003676//nucleic acid binding;GO:0004519//endonuclease activity	GO:0006308//DNA catabolic process
State 1,3,4 -vs- State 1,3,5	SK1G00054830	1	6.83052e-20	1.49688e-17	Os04g0650000	EEC78138.1 hypothetical protein OsI_17694 [Oryza sativa Indica Group]	-	-	-	-	-	GO:0008234//cysteine-type peptidase activity	GO:0006508//proteolysis
State 1,3,4 -vs- State 1,3,5	SK1G00054847	2	3.11819e-09	2.23509e-07	GLPK	CAH68428.1 H0811D08.16 [Oryza sativa]	Metabolism;Organismal Systems;Metabolism	Global and overview maps;Environmental adaptation;Lipid metabolism	ko01100//Metabolic pathways;ko04626//Plant-pathogen interaction;ko00561//Glycerolipid metabolism	K00864;K00864;K00864	-	GO:0004370//glycerol kinase activity;GO:0004856//xylulokinase activity;GO:0005515//protein binding;GO:0008737//L-fuculokinase activity;GO:0008741//ribulokinase activity;GO:0008993//rhamnulokinase activity;GO:0016773//phosphotransferase activity, alcohol group as acceptor;GO:0019200//carbohydrate kinase activity	GO:0005975//carbohydrate metabolic process;GO:0005997//xylulose metabolic process;GO:0006071//glycerol metabolic process;GO:0009255//Entner-Doudoroff pathway through 6-phosphogluconate;GO:0019301//rhamnose catabolic process;GO:0019568//arabinose catabolic process;GO:0042355//L-fucose catabolic process;GO:0042732//D-xylose metabolic process
State 1,3,4 -vs- State 1,3,5	SK1G00054859	2	1.48441e-10	1.29955e-08	--	KAB8097218.1 hypothetical protein EE612_025902 [Oryza sativa]	-	-	-	-	-	-	-
State 1,3,4 -vs- State 1,3,5	SK1G00054955	2	1.74465e-176	1.20053e-172	Os04g0670200	XP_015636103.1 oryzain beta chain [Oryza sativa Japonica Group]	-	-	-	-	-	GO:0008234//cysteine-type peptidase activity	GO:0006508//proteolysis
State 1,3,4 -vs- State 1,3,5	SK1G00054973	2	1.44586e-09	1.08854e-07	HIPP39	XP_015633725.1 heavy metal-associated isoprenylated plant protein 39 [Oryza sativa Japonica Group]	-	-	-	-	-	GO:0046872//metal ion binding	-
State 1,3,4 -vs- State 1,3,5	SK1G00066133	3	7.91881e-09	5.33179e-07	WAK5	AAL83452.4 protein kinase [Oryza sativa]	-	-	-	-	-	GO:0004672//protein kinase activity;GO:0005509//calcium ion binding;GO:0005524//ATP binding;GO:0030247//polysaccharide binding	GO:0006468//protein phosphorylation
State 1,3,4 -vs- State 1,3,5	SK1G00066154	5	1.84696e-10	1.58076e-08	HSC-2	XP_015616495.1 heat shock cognate 70 kDa protein 2 [Oryza sativa Japonica Group]	Genetic Information Processing;Genetic Information Processing;Cellular Processes	Folding, sorting and degradation;Transcription;Transport and catabolism	ko04141//Protein processing in endoplasmic reticulum;ko03040//Spliceosome;ko04144//Endocytosis	K03283;K03283;K03283	-	GO:0004856//xylulokinase activity;GO:0005515//protein binding;GO:0005524//ATP binding;GO:0016773//phosphotransferase activity, alcohol group as acceptor;GO:0016887//ATPase activity;GO:0051082//unfolded protein binding	GO:0005975//carbohydrate metabolic process;GO:0005997//xylulose metabolic process;GO:0006457//protein folding;GO:0006950//response to stress;GO:0008360//regulation of cell shape;GO:0042732//D-xylose metabolic process;GO:0043093//FtsZ-dependent cytokinesis
State 1,3,4 -vs- State 1,3,5	SK1G00066158	1	1.32926e-10	1.1667e-08	ERR26	XP_015617237.1 metallothionein-like protein 1A [Oryza sativa Japonica Group]	-	-	-	-	-	GO:0008270//zinc ion binding;GO:0046872//metal ion binding	-
State 1,3,4 -vs- State 1,3,5	SK1G00066161	2	1.18188e-08	7.71606e-07	RBL1	XP_015615259.1 RHOMBOID-like protein 2 [Oryza sativa Japonica Group]	-	-	-	-	GO:0005886//plasma membrane;GO:0005887//integral component of plasma membrane;GO:0016021//integral component of membrane	GO:0004252//serine-type endopeptidase activity	GO:0006464//cellular protein modification process;GO:0019538//protein metabolic process
State 1,3,4 -vs- State 1,3,5	SK1G00066302	5	1.83004e-10	1.57018e-08	TCTP	XP_015617060.1 translationally-controlled tumor protein homolog [Oryza sativa Japonica Group]	-	-	-	-	-	-	-
State 1,3,4 -vs- State 1,3,5	SK1G00066482	3	1.60507e-09	1.19274e-07	Os11g0629400	XP_015617790.1 protein SPIRAL1-like 2 [Oryza sativa Japonica Group]	-	-	-	-	-	-	-
State 1,3,4 -vs- State 1,3,5	SK1G00066520	2	2.4289e-11	2.33432e-09	ACX2	XP_015616488.1 acyl-coenzyme A oxidase 2, peroxisomal [Oryza sativa Japonica Group]	Metabolism;Metabolism;Metabolism;Cellular Processes;Metabolism;Metabolism;Metabolism;Metabolism;Metabolism;Metabolism	Global and overview maps;Global and overview maps;Global and overview maps;Transport and catabolism;Global and overview maps;Lipid metabolism;Lipid metabolism;Metabolism of other amino acids;Lipid metabolism;Carbohydrate metabolism	ko01100//Metabolic pathways;ko01110//Biosynthesis of secondary metabolites;ko01200//Carbon metabolism;ko04146//Peroxisome;ko01212//Fatty acid metabolism;ko00592//alpha-Linolenic acid metabolism;ko00071//Fatty acid degradation;ko00410//beta-Alanine metabolism;ko01040//Biosynthesis of unsaturated fatty acids;ko00640//Propanoate metabolism	K00232;K00232;K00232;K00232;K00232;K00232;K00232;K00232;K00232;K00232	GO:0005777//peroxisome	GO:0003997//acyl-CoA oxidase activity;GO:0016627//oxidoreductase activity, acting on the CH-CH group of donors;GO:0018515//pimeloyl-CoA dehydrogenase activity;GO:0050660//flavin adenine dinucleotide binding	GO:0006635//fatty acid beta-oxidation;GO:0055114//oxidation-reduction process
State 1,3,4 -vs- State 1,3,5	SK1G00066678	2	7.50841e-12	7.80467e-10	PR4B	EAY81552.1 hypothetical protein OsI_36718 [Oryza sativa Indica Group]	-	-	-	-	-	-	GO:0042742//defense response to bacterium;GO:0050832//defense response to fungus
State 1,3,4 -vs- State 1,3,5	SK1G00066944	5	8.99317e-10	6.96889e-08	XTH	KAB8115467.1 hypothetical protein EE612_055976 [Oryza sativa]	-	-	-	-	GO:0005618//cell wall;GO:0048046//apoplast	GO:0004553//hydrolase activity, hydrolyzing O-glycosyl compounds;GO:0016762//xyloglucan:xyloglucosyl transferase activity	GO:0005975//carbohydrate metabolic process;GO:0006073//cellular glucan metabolic process
State 1,3,4 -vs- State 1,3,5	SK1G00067100	5	1.46265e-18	2.85931e-16	--	XP_015615820.1 uncharacterized protein LOC4350553 [Oryza sativa Japonica Group]	-	-	-	-	-	-	-
State 1,3,4 -vs- State 1,3,5	SK1G00067257	3	3.33399e-15	4.77956e-13	SHM4	KAF2910767.1 hypothetical protein DAI22_11g125700 [Oryza sativa Japonica Group]	Metabolism;Metabolism;Metabolism;Metabolism;Metabolism;Metabolism;Metabolism;Metabolism	Global and overview maps;Global and overview maps;Global and overview maps;Global and overview maps;Carbohydrate metabolism;Amino acid metabolism;Metabolism of other amino acids;Metabolism of cofactors and vitamins	ko01100//Metabolic pathways;ko01110//Biosynthesis of secondary metabolites;ko01200//Carbon metabolism;ko01230//Biosynthesis of amino acids;ko00630//Glyoxylate and dicarboxylate metabolism;ko00260//Glycine, serine and threonine metabolism;ko00460//Cyanoamino acid metabolism;ko00670//One carbon pool by folate	K00600;K00600;K00600;K00600;K00600;K00600;K00600;K00600	-	GO:0004371//glycerone kinase activity;GO:0016829//lyase activity;GO:0030170//pyridoxal phosphate binding;GO:0033806//fluorothreonine transaldolase activity	GO:0006071//glycerol metabolic process;GO:0006520//cellular amino acid metabolic process;GO:0009058//biosynthetic process;GO:0090346//cellular organofluorine metabolic process
State 1,3,4 -vs- State 1,3,5	SK1G00067261	3	1.34719e-27	4.41443e-25	SAHH	AAO72664.1 wheat adenosylhomocysteinase-like protein [Oryza sativa Japonica Group]	Metabolism;Metabolism	Global and overview maps;Amino acid metabolism	ko01100//Metabolic pathways;ko00270//Cysteine and methionine metabolism	K01251;K01251	GO:0005737//cytoplasm	GO:0003824//catalytic activity;GO:0004013//adenosylhomocysteinase activity;GO:0004455//ketol-acid reductoisomerase activity;GO:0004488//methylenetetrahydrofolate dehydrogenase (NADP+) activity;GO:0004617//phosphoglycerate dehydrogenase activity;GO:0008883//glutamyl-tRNA reductase activity;GO:0016491//oxidoreductase activity;GO:0051287//NAD binding;GO:0070403//NAD+ binding	GO:0006520//cellular amino acid metabolic process;GO:0006564//L-serine biosynthetic process;GO:0006631//fatty acid metabolic process;GO:0006730//one-carbon metabolic process;GO:0006779//porphyrin-containing compound biosynthetic process;GO:0006813//potassium ion transport;GO:0008652//cellular amino acid biosynthetic process;GO:0009097//isoleucine biosynthetic process;GO:0009099//valine biosynthet…
State 1,3,4 -vs- State 1,3,5	SK1G00067349	5	5.74296e-10	4.54235e-08	RPL38A	XP_015617721.1 60S ribosomal protein L38 [Oryza sativa Japonica Group]	Genetic Information Processing	Translation	ko03010//Ribosome	K02923	GO:0005840//ribosome	GO:0003735//structural constituent of ribosome	GO:0006412//translation
State 1,3,4 -vs- State 1,3,5	SK1G00067582	4	5.09127e-74	6.48778e-71	CYP87A3	EEC68024.1 hypothetical protein OsI_35831 [Oryza sativa Indica Group]	-	-	-	-	-	GO:0005506//iron ion binding;GO:0016705//oxidoreductase activity, acting on paired donors, with incorporation or reduction of molecular oxygen;GO:0020037//heme binding	GO:0055114//oxidation-reduction process
State 1,3,4 -vs- State 1,3,5	SK1G00067585	4	7.80962e-34	3.5355e-31	Os11g0285000	KAF2910510.1 hypothetical protein DAI22_11g105300 [Oryza sativa Japonica Group]	-	-	-	-	-	GO:0003824//catalytic activity;GO:0034073//tetrahymanol cyclase activity;GO:0051007//squalene-hopene cyclase activity	GO:0016114//terpenoid biosynthetic process;GO:0019746//hopanoid biosynthetic process
State 1,3,4 -vs- State 1,3,5	SK1G00067717	2	6.0099e-26	1.72314e-23	--	EAY80474.1 hypothetical protein OsI_35652 [Oryza sativa Indica Group]	-	-	-	-	-	-	-
State 1,3,4 -vs- State 1,3,5	SK1G00067753	5	3.3869e-15	4.83525e-13	TUBA	ABG78593.1 alpha-tubulin [Oryza sativa Japonica Group]	Cellular Processes	Transport and catabolism	ko04145//Phagosome	K07374	-	GO:0003924//GTPase activity	GO:0000910//cytokinesis
State 1,3,4 -vs- State 1,3,5	SK1G00067834	2	5.37123e-11	4.99466e-09	RPM1	KAF2910176.1 hypothetical protein DAI22_11g081600 [Oryza sativa Japonica Group]	Organismal Systems	Environmental adaptation	ko04626//Plant-pathogen interaction	K13457	GO:0005737//cytoplasm	GO:0003677//DNA binding;GO:0005515//protein binding;GO:0016887//ATPase activity;GO:0017111//nucleoside-triphosphatase activity;GO:0020037//heme binding;GO:0043531//ADP binding	GO:0001887//selenium compound metabolic process;GO:0002949//tRNA threonylcarbamoyladenosine modification;GO:0006260//DNA replication;GO:0006400//tRNA modification;GO:0009306//protein secretion;GO:0042167//heme catabolic process
State 1,3,4 -vs- State 1,3,5	SK1G00067849	2	3.2418e-10	2.67476e-08	CEPR2	EAZ17908.1 hypothetical protein OsJ_33455 [Oryza sativa Japonica Group]	-	-	-	-	-	GO:0004672//protein kinase activity;GO:0005515//protein binding;GO:0005524//ATP binding	GO:0006468//protein phosphorylation
State 1,3,4 -vs- State 1,3,5	SK1G00068006	3	3.1229e-14	4.14851e-12	DIR21	RYR51614.1 hypothetical protein Ahy_A06g026591 isoform A [Arachis hypogaea]	-	-	-	-	-	-	-
State 1,3,4 -vs- State 1,3,5	SK1G00068120	2	5.9131e-16	9.04205e-14	ASR5	XP_015617282.1 abscisic stress-ripening protein 5-like [Oryza sativa Japonica Group]	-	-	-	-	-	-	-
State 1,3,4 -vs- State 1,3,5	SK1G00068123	5	7.47084e-11	6.87277e-09	RPL3	NP_001364310.1 60S ribosomal protein L3-like [Oryza sativa Japonica Group]	Genetic Information Processing	Folding, sorting and degradation	ko04130//SNARE interactions in vesicular transport	K08498	GO:0005840//ribosome;GO:0022625//cytosolic large ribosomal subunit	GO:0003735//structural constituent of ribosome	GO:0006412//translation
State 1,3,4 -vs- State 1,3,5	SK1G00068246	5	6.08007e-10	4.79796e-08	RPL26A	XP_015617829.1 60S ribosomal protein L26-1 [Oryza sativa Japonica Group]	Genetic Information Processing	Translation	ko03010//Ribosome	K02898	GO:0000315//organellar large ribosomal subunit;GO:0015934//large ribosomal subunit;GO:0022625//cytosolic large ribosomal subunit	GO:0003735//structural constituent of ribosome	GO:0006412//translation
State 1,3,4 -vs- State 1,3,5	SK1G00068369	2	6.54571e-20	1.44366e-17	ASD1	KAF0907281.1 hypothetical protein E2562_015782 [Oryza meyeriana var. granulata] [Oryza meyeriana]	Metabolism;Metabolism	Global and overview maps;Carbohydrate metabolism	ko01100//Metabolic pathways;ko00520//Amino sugar and nucleotide sugar metabolism	K01209;K01209	-	GO:0016798//hydrolase activity, acting on glycosyl bonds;GO:0046556//alpha-L-arabinofuranosidase activity	GO:0046373//L-arabinose metabolic process
State 1,3,4 -vs- State 1,3,5	SK1G00068393	2	2.67215e-26	7.99462e-24	AMC9	EAY79833.1 hypothetical protein OsI_34992 [Oryza sativa Indica Group]	-	-	-	-	-	-	-
State 1,3,4 -vs- State 1,3,5	SK1G00068458	3	1.3683e-08	8.83257e-07	TBL34	XP_015615528.1 protein trichome birefringence-like 34 [Oryza sativa Japonica Group]	-	-	-	-	-	-	-
State 1,3,4 -vs- State 1,3,5	SK1G00068490	2	2.60018e-26	7.84754e-24	--	XP_015615871.1 uncharacterized protein LOC4349582 isoform X1 [Oryza sativa Japonica Group]	-	-	-	-	-	-	-
State 1,3,4 -vs- State 1,3,5	SK1G00068499	2	8.05226e-13	9.55331e-11	--	XP_015616826.1 uncharacterized protein LOC4349589 [Oryza sativa Japonica Group]	-	-	-	-	-	-	GO:0006629//lipid metabolic process
State 1,3,4 -vs- State 1,3,5	SK1G00068511	2	9.88072e-16	1.47167e-13	--	EEC67538.1 hypothetical protein OsI_34856 [Oryza sativa Indica Group]	-	-	-	-	-	GO:0004564//beta-fructofuranosidase activity;GO:0004575//sucrose alpha-glucosidase activity	GO:0043386//mycotoxin biosynthetic process
State 1,3,4 -vs- State 1,3,5	SK1G00068520	1	1.08122e-10	9.71292e-09	LTP2-A	XP_015615471.1 non-specific lipid-transfer protein 2A [Oryza sativa Japonica Group]	-	-	-	-	-	-	-
State 1,3,4 -vs- State 1,3,5	SK1G00068522	1	1.21794e-10	1.0843e-08	LTP3	XP_015618578.1 probable non-specific lipid-transfer protein 3 [Oryza sativa Japonica Group]	-	-	-	-	-	-	-
State 1,3,4 -vs- State 1,3,5	SK1G00055068	2	1.43405e-47	1.12136e-44	At5g47470	XP_025882163.1 WAT1-related protein At5g47470 [Oryza sativa Japonica Group]	-	-	-	-	GO:0016020//membrane;GO:0016021//integral component of membrane	-	-
State 1,3,4 -vs- State 1,3,5	SK1G00055077	2	4.49721e-26	1.32249e-23	GSVIVT00026920001	XP_015643779.1 probable polygalacturonase [Oryza sativa Japonica Group]	-	-	-	-	-	GO:0004650//polygalacturonase activity	GO:0005975//carbohydrate metabolic process
State 1,3,4 -vs- State 1,3,5	SK1G00055104	3	5.79371e-12	6.11468e-10	G6PGH1	XP_015642949.1 6-phosphogluconate dehydrogenase, decarboxylating 1 [Oryza sativa Japonica Group]	Metabolism;Metabolism;Metabolism;Metabolism;Metabolism	Global and overview maps;Global and overview maps;Global and overview maps;Metabolism of other amino acids;Carbohydrate metabolism	ko01100//Metabolic pathways;ko01110//Biosynthesis of secondary metabolites;ko01200//Carbon metabolism;ko00480//Glutathione metabolism;ko00030//Pentose phosphate pathway	K00033;K00033;K00033;K00033;K00033	GO:0005737//cytoplasm	GO:0004616//phosphogluconate dehydrogenase (decarboxylating) activity;GO:0008442//3-hydroxyisobutyrate dehydrogenase activity;GO:0008679//2-hydroxy-3-oxopropionate reductase activity;GO:0050661//NADP binding	GO:0006098//pentose-phosphate shunt;GO:0006574//valine catabolic process;GO:0055114//oxidation-reduction process
State 1,3,4 -vs- State 1,3,5	SK1G00055252	1	2.19087e-15	3.16719e-13	--	AAO33152.1 unknown [Oryza sativa Japonica Group]	-	-	-	-	-	-	-
State 1,3,4 -vs- State 1,3,5	SK1G00055324	3	2.28139e-10	1.94291e-08	--	EEC79971.1 hypothetical protein OsI_21595 [Oryza sativa Indica Group]	-	-	-	-	-	GO:0031267//small GTPase binding	-
State 1,3,4 -vs- State 1,3,5	SK1G00055401	5	9.63808e-16	1.44177e-13	RPS30A	ESR64610.1 hypothetical protein CICLE_v10009868mg [Citrus clementina]	Genetic Information Processing	Translation	ko03010//Ribosome	K02983	GO:0005840//ribosome	GO:0003735//structural constituent of ribosome	GO:0006412//translation
State 1,3,4 -vs- State 1,3,5	SK1G00055494	2	4.6282e-19	9.31215e-17	At5g45910	EEE65121.1 hypothetical protein OsJ_20187 [Oryza sativa Japonica Group]	-	-	-	-	GO:0016592//mediator complex	GO:0003712//transcription cofactor activity;GO:0016788//hydrolase activity, acting on ester bonds	GO:0006357//regulation of transcription from RNA polymerase II promoter
State 1,3,4 -vs- State 1,3,5	SK1G00055511	2	1.08834e-10	9.75141e-09	YDL109C	XP_015643190.1 putative lipase YDR444W isoform X1 [Oryza sativa Japonica Group]	-	-	-	-	-	-	-
State 1,3,4 -vs- State 1,3,5	SK1G00055519	3	6.13963e-26	1.74579e-23	SUS2	XP_015643025.1 sucrose synthase 2 [Oryza sativa Japonica Group]	Metabolism;Metabolism;Metabolism	Global and overview maps;Global and overview maps;Carbohydrate metabolism	ko01100//Metabolic pathways;ko01110//Biosynthesis of secondary metabolites;ko00500//Starch and sucrose metabolism	K00695;K00695;K00695	-	GO:0004373//glycogen (starch) synthase activity;GO:0008194//UDP-glycosyltransferase activity;GO:0009011//starch synthase activity;GO:0016157//sucrose synthase activity;GO:0016757//transferase activity, transferring glycosyl groups	GO:0005978//glycogen biosynthetic process;GO:0005985//sucrose metabolic process;GO:0009058//biosynthetic process;GO:0010125//mycothiol biosynthetic process;GO:0071793//bacillithiol biosynthetic process
State 1,3,4 -vs- State 1,3,5	SK1G00055602	5	3.1185e-11	2.9396e-09	RPL39C	KAF0901916.1 hypothetical protein E2562_011756 [Oryza meyeriana var. granulata] [Oryza meyeriana]	Genetic Information Processing	Translation	ko03010//Ribosome	K02924	GO:0005840//ribosome	GO:0003735//structural constituent of ribosome	GO:0006412//translation
State 1,3,4 -vs- State 1,3,5	SK1G00055650	2	4.33633e-82	7.85241e-79	--	XP_015641712.1 uncharacterized protein LOC4340492 [Oryza sativa Japonica Group]	-	-	-	-	-	GO:0009055//electron carrier activity	-
State 1,3,4 -vs- State 1,3,5	SK1G00055694	1	5.25624e-15	7.32171e-13	DSP2	XP_015644415.1 probable tyrosine-protein phosphatase DSP2 [Oryza sativa Japonica Group]	-	-	-	-	-	GO:0004721//phosphoprotein phosphatase activity;GO:0004725//protein tyrosine phosphatase activity	GO:0006470//protein dephosphorylation
State 1,3,4 -vs- State 1,3,5	SK1G00055838	3	8.57457e-10	6.65952e-08	ANN1	EAZ00194.1 hypothetical protein OsI_22198 [Oryza sativa Indica Group]	-	-	-	-	-	GO:0005509//calcium ion binding;GO:0005544//calcium-dependent phospholipid binding	-
State 1,3,4 -vs- State 1,3,5	SK1G00055848	2	7.16886e-09	4.84581e-07	PHI-1	XP_015644023.1 protein EXORDIUM [Oryza sativa Japonica Group]	-	-	-	-	-	-	-
State 1,3,4 -vs- State 1,3,5	SK1G00055851	2	2.12071e-11	2.05535e-09	FBW2	XP_015641083.1 F-box protein FBW2 [Oryza sativa Japonica Group]	-	-	-	-	-	GO:0005515//protein binding	-
State 1,3,4 -vs- State 1,3,5	SK1G00055906	3	1.07997e-08	7.13196e-07	PFP-BETA	XP_015643982.1 pyrophosphate--fructose 6-phosphate 1-phosphotransferase subunit beta [Oryza sativa Japonica Group]	Metabolism;Metabolism;Metabolism;Metabolism;Metabolism	Global and overview maps;Global and overview maps;Carbohydrate metabolism;Carbohydrate metabolism;Carbohydrate metabolism	ko01100//Metabolic pathways;ko01110//Biosynthesis of secondary metabolites;ko00010//Glycolysis / Gluconeogenesis;ko00051//Fructose and mannose metabolism;ko00030//Pentose phosphate pathway	K00895;K00895;K00895;K00895;K00895	-	GO:0003872//6-phosphofructokinase activity;GO:0016773//phosphotransferase activity, alcohol group as acceptor;GO:0047334//diphosphate-fructose-6-phosphate 1-phosphotransferase activity	GO:0006096//glycolytic process
State 1,3,4 -vs- State 1,3,5	SK1G00055929	2	2.29527e-36	1.25178e-33	AAMT2	BAS97015.1 Os06g0244000, partial [Oryza sativa Japonica Group]	-	-	-	-	-	GO:0003700//transcription factor activity, sequence-specific DNA binding;GO:0008168//methyltransferase activity	GO:0006355//regulation of transcription, DNA-templated
State 1,3,4 -vs- State 1,3,5	SK1G00056084	2	3.66656e-99	8.41011e-96	PXG4	XP_015641088.1 probable peroxygenase 4 [Oryza sativa Japonica Group]	Metabolism	Lipid metabolism	ko00073//Cutin, suberine and wax biosynthesis	K17991	-	GO:0005509//calcium ion binding	-
State 1,3,4 -vs- State 1,3,5	SK1G00056132	2	8.42744e-20	1.81222e-17	--	XP_015642551.1 uncharacterized protein LOC9272107 isoform X1 [Oryza sativa Japonica Group]	-	-	-	-	-	-	-
State 1,3,4 -vs- State 1,3,5	SK1G00056419	5	9.54562e-10	7.34735e-08	Os06g0486800	EEC80636.1 hypothetical protein OsI_23019 [Oryza sativa Indica Group]	Metabolism;Metabolism;Metabolism	Global and overview maps;Global and overview maps;Carbohydrate metabolism	ko01100//Metabolic pathways;ko01200//Carbon metabolism;ko00630//Glyoxylate and dicarboxylate metabolism	K00122;K00122;K00122	GO:0005737//cytoplasm	GO:0003824//catalytic activity;GO:0004617//phosphoglycerate dehydrogenase activity;GO:0008883//glutamyl-tRNA reductase activity;GO:0016616//oxidoreductase activity, acting on the CH-OH group of donors, NAD or NADP as acceptor;GO:0050661//NADP binding;GO:0051287//NAD binding	GO:0006564//L-serine biosynthetic process;GO:0006777//Mo-molybdopterin cofactor biosynthetic process;GO:0006779//porphyrin-containing compound biosynthetic process;GO:0055114//oxidation-reduction process
State 1,3,4 -vs- State 1,3,5	SK1G00056518	2	4.37507e-09	3.03485e-07	At1g48100	XP_015642318.1 polygalacturonase At1g48100-like [Oryza sativa Japonica Group]	-	-	-	-	-	GO:0004650//polygalacturonase activity	GO:0005975//carbohydrate metabolic process;GO:0051186//cofactor metabolic process;GO:0071941//nitrogen cycle metabolic process
State 1,3,4 -vs- State 1,3,5	SK1G00056580	2	1.69146e-28	5.70554e-26	PPH	EEC80574.1 hypothetical protein OsI_22903 [Oryza sativa Indica Group]	-	-	-	-	-	GO:0003674//molecular_function;GO:0003824//catalytic activity;GO:0016787//hydrolase activity;GO:0047570//3-oxoadipate enol-lactonase activity;GO:0070205//2-succinyl-6-hydroxy-2,4-cyclohexadiene-1-carboxylate synthase activity	GO:0009102//biotin biosynthetic process;GO:0009234//menaquinone biosynthetic process;GO:0015979//photosynthesis;GO:0042952//beta-ketoadipate pathway
State 1,3,4 -vs- State 1,3,5	SK1G00056599	2	1.45029e-12	1.66587e-10	XIPI	XP_015641941.2 xylanase inhibitor protein 1 isoform X1 [Oryza sativa Japonica Group]	Metabolism;Metabolism	Global and overview maps;Carbohydrate metabolism	ko01100//Metabolic pathways;ko00520//Amino sugar and nucleotide sugar metabolism	K01183;K01183	-	-	GO:0005975//carbohydrate metabolic process
State 1,3,4 -vs- State 1,3,5	SK1G00056663	2	1.09961e-14	1.50132e-12	DMP4	CAE02081.2 OSJNBa0074B10.9 [Oryza sativa Japonica Group]	-	-	-	-	-	-	-
State 1,3,4 -vs- State 1,3,5	SK1G00056712	5	4.50791e-09	3.12071e-07	TIP2-2	QCZ35098.1 TIP2;2 [Oryza sativa Indica Group]	-	-	-	-	GO:0016020//membrane	GO:0015267//channel activity	GO:0055085//transmembrane transport
State 1,3,4 -vs- State 1,3,5	SK1G00056902	2	3.37355e-54	2.97616e-51	FAD-OXR	EEC80786.1 hypothetical protein OsI_23315 [Oryza sativa Indica Group]	-	-	-	-	-	GO:0008891//glycolate oxidase activity;GO:0016491//oxidoreductase activity;GO:0050660//flavin adenine dinucleotide binding	GO:0005975//carbohydrate metabolic process;GO:0055114//oxidation-reduction process
State 1,3,4 -vs- State 1,3,5	SK1G00056911	3	6.86642e-31	2.68462e-28	PER52	XP_015643864.1 peroxidase P7 [Oryza sativa Japonica Group]	Metabolism;Metabolism;Metabolism	Global and overview maps;Global and overview maps;Biosynthesis of other secondary metabolites	ko01100//Metabolic pathways;ko01110//Biosynthesis of secondary metabolites;ko00940//Phenylpropanoid biosynthesis	K00430;K00430;K00430	-	GO:0004601//peroxidase activity;GO:0020037//heme binding	GO:0006979//response to oxidative stress;GO:0055114//oxidation-reduction process
State 1,3,4 -vs- State 1,3,5	SK1G00056945	2	1.54866e-13	1.91666e-11	--	XP_015643400.1 uncharacterized protein LOC4341221 [Oryza sativa Japonica Group]	-	-	-	-	-	-	-
State 1,3,4 -vs- State 1,3,5	SK1G00057038	2	2.79524e-14	3.75676e-12	AAP6	XP_015644123.1 amino acid permease 3 [Oryza sativa Japonica Group]	-	-	-	-	-	-	-
State 1,3,4 -vs- State 1,3,5	SK1G00057103	2	1.49132e-15	2.18343e-13	Os06g0573600	EAZ01416.1 hypothetical protein OsI_23450 [Oryza sativa Indica Group]	-	-	-	-	GO:0009341//beta-galactosidase complex	GO:0004553//hydrolase activity, hydrolyzing O-glycosyl compounds;GO:0004565//beta-galactosidase activity	GO:0005975//carbohydrate metabolic process
State 1,3,4 -vs- State 1,3,5	SK1G00057123	2	2.86051e-86	6.15118e-83	HO1	XP_015643881.1 heme oxygenase 1, chloroplastic isoform X1 [Oryza sativa Japonica Group]	Metabolism;Metabolism;Metabolism	Global and overview maps;Global and overview maps;Metabolism of cofactors and vitamins	ko01100//Metabolic pathways;ko01110//Biosynthesis of secondary metabolites;ko00860//Porphyrin and chlorophyll metabolism	K21480;K21480;K21480	GO:0005576//extracellular region	GO:0003674//molecular_function;GO:0004392//heme oxygenase (decyclizing) activity	GO:0006788//heme oxidation;GO:0008150//biological_process;GO:0055114//oxidation-reduction process
State 1,3,4 -vs- State 1,3,5	SK1G00057259	2	8.18833e-126	2.81728e-122	At5g10770	XP_015641459.1 aspartyl protease family protein At5g10770 isoform X1 [Oryza sativa Japonica Group]	-	-	-	-	-	GO:0008201//heparin binding	-
State 1,3,4 -vs- State 1,3,5	SK1G00057273	2	1.54033e-09	1.15461e-07	RGLG2	ACN85164.1 copine-1 [Oryza sativa f. spontanea]	-	-	-	-	-	GO:0046872//metal ion binding	-
State 1,3,4 -vs- State 1,3,5	SK1G00057668	2	8.77377e-33	3.5937e-30	BGLU25	XP_015643676.1 beta-glucosidase 25 isoform X1 [Oryza sativa Japonica Group]	Metabolism;Metabolism;Metabolism;Metabolism;Metabolism	Global and overview maps;Global and overview maps;Biosynthesis of other secondary metabolites;Carbohydrate metabolism;Metabolism of other amino acids	ko01100//Metabolic pathways;ko01110//Biosynthesis of secondary metabolites;ko00940//Phenylpropanoid biosynthesis;ko00500//Starch and sucrose metabolism;ko00460//Cyanoamino acid metabolism	K01188;K01188;K01188;K01188;K01188	GO:0009341//beta-galactosidase complex	GO:0004553//hydrolase activity, hydrolyzing O-glycosyl compounds;GO:0004565//beta-galactosidase activity	GO:0005975//carbohydrate metabolic process;GO:0006012//galactose metabolic process;GO:0071704//organic substance metabolic process
State 1,3,4 -vs- State 1,3,5	SK1G00057680	3	1.00051e-27	3.30996e-25	PER3	XP_015641122.1 peroxidase 3 [Oryza sativa Japonica Group]	Metabolism;Metabolism;Metabolism	Global and overview maps;Global and overview maps;Biosynthesis of other secondary metabolites	ko01100//Metabolic pathways;ko01110//Biosynthesis of secondary metabolites;ko00940//Phenylpropanoid biosynthesis	K00430;K00430;K00430	-	GO:0004601//peroxidase activity;GO:0020037//heme binding	GO:0006979//response to oxidative stress;GO:0055114//oxidation-reduction process
State 1,3,4 -vs- State 1,3,5	SK1G00057696	2	5.40847e-34	2.51465e-31	B3GALT2	XP_015641593.1 probable beta-1,3-galactosyltransferase 2 [Oryza sativa Japonica Group]	-	-	-	-	GO:0016020//membrane	GO:0016757//transferase activity, transferring glycosyl groups;GO:0016758//transferase activity, transferring hexosyl groups	GO:0006260//DNA replication;GO:0006486//protein glycosylation;GO:0055114//oxidation-reduction process
State 1,3,4 -vs- State 1,3,5	SK1G00057789	5	7.9393e-11	7.26488e-09	Os06g0701400	XP_015641043.1 60S acidic ribosomal protein P3 [Oryza sativa Japonica Group]	Genetic Information Processing	Translation	ko03010//Ribosome	K02942	-	GO:0003674//molecular_function	GO:0043571//maintenance of CRISPR repeat elements
State 1,3,4 -vs- State 1,3,5	SK1G00057832	2	4.01481e-18	7.50726e-16	XTH25	KAA3471552.1 xyloglucan endotransglucosylase/hydrolase protein 22-like [Gossypium australe]	Environmental Information Processing	Signal transduction	ko04075//Plant hormone signal transduction	K14504	GO:0005618//cell wall;GO:0048046//apoplast	GO:0004553//hydrolase activity, hydrolyzing O-glycosyl compounds;GO:0016762//xyloglucan:xyloglucosyl transferase activity	GO:0005975//carbohydrate metabolic process;GO:0006073//cellular glucan metabolic process
State 1,3,4 -vs- State 1,3,5	SK1G00057884	2	2.79261e-11	2.6469e-09	Cht1	THU62428.1 hypothetical protein C4D60_Mb01t05050 [Musa balbisiana]	Metabolism;Environmental Information Processing;Metabolism	Global and overview maps;Signal transduction;Carbohydrate metabolism	ko01100//Metabolic pathways;ko04016//MAPK signaling pathway - plant;ko00520//Amino sugar and nucleotide sugar metabolism	K20547;K20547;K20547	-	GO:0004568//chitinase activity;GO:0008061//chitin binding	GO:0006032//chitin catabolic process;GO:0016998//cell wall macromolecule catabolic process
State 1,3,4 -vs- State 1,3,5	SK1G00058000	2	1.70599e-11	1.68667e-09	At3g45870	XP_015643586.1 WAT1-related protein At3g45870 [Oryza sativa Japonica Group]	-	-	-	-	GO:0016020//membrane;GO:0016021//integral component of membrane	-	-
State 1,3,4 -vs- State 1,3,5	SK1G00058063	5	7.64873e-16	1.15931e-13	MT2C	ABQ57494.1 metallothionein 2b-like protein [Oryza sativa Indica Group]	-	-	-	-	-	GO:0046872//metal ion binding	-
State 1,3,4 -vs- State 1,3,5	SK1G00058112	2	2.40405e-10	2.03228e-08	CHIP	KAF2928713.1 hypothetical protein DAI22_05g003700 [Oryza sativa Japonica Group]	Genetic Information Processing;Genetic Information Processing	Folding, sorting and degradation;Folding, sorting and degradation	ko04141//Protein processing in endoplasmic reticulum;ko04120//Ubiquitin mediated proteolysis	K09561;K09561	-	GO:0005515//protein binding	-
State 1,3,4 -vs- State 1,3,5	SK1G00058127	2	5.27406e-14	6.84752e-12	ML3	EEC78342.1 hypothetical protein OsI_18088 [Oryza sativa Indica Group]	-	-	-	-	-	GO:0003676//nucleic acid binding	GO:0008380//RNA splicing
State 1,3,4 -vs- State 1,3,5	SK1G00058257	1	2.43845e-16	3.83092e-14	--	XP_015640041.1 glycine-rich protein A3 [Oryza sativa Japonica Group]	-	-	-	-	-	-	-
State 1,3,4 -vs- State 1,3,5	SK1G00058259	4	8.23555e-09	5.52344e-07	--	EAY96595.1 hypothetical protein OsI_18501 [Oryza sativa Indica Group]	-	-	-	-	-	GO:0016787//hydrolase activity;GO:0016788//hydrolase activity, acting on ester bonds	GO:0006629//lipid metabolic process
State 1,3,4 -vs- State 1,3,5	SK1G00058347	2	4.79794e-17	8.21283e-15	At3g05170	EAY96505.1 hypothetical protein OsI_18407 [Oryza sativa Indica Group]	-	-	-	-	-	-	GO:0009236//cobalamin biosynthetic process
State 1,3,4 -vs- State 1,3,5	SK1G00058380	3	1.29943e-20	2.94133e-18	SAM1	XP_015638780.1 S-adenosylmethionine synthase 1 [Oryza sativa Japonica Group]	Metabolism;Metabolism;Metabolism;Metabolism	Global and overview maps;Global and overview maps;Global and overview maps;Amino acid metabolism	ko01100//Metabolic pathways;ko01110//Biosynthesis of secondary metabolites;ko01230//Biosynthesis of amino acids;ko00270//Cysteine and methionine metabolism	K00789;K00789;K00789;K00789	-	GO:0003677//DNA binding;GO:0004478//methionine adenosyltransferase activity;GO:0004803//transposase activity	GO:0006313//transposition, DNA-mediated;GO:0006556//S-adenosylmethionine biosynthetic process
State 1,3,4 -vs- State 1,3,5	SK1G00058553	3	1.49197e-18	2.90016e-16	SG12	XP_015639565.1 60S ribosomal protein L10-2 [Oryza sativa Japonica Group]	Genetic Information Processing	Translation	ko03010//Ribosome	K02866	GO:0000315//organellar large ribosomal subunit;GO:0005840//ribosome;GO:0015934//large ribosomal subunit;GO:0022625//cytosolic large ribosomal subunit	GO:0003735//structural constituent of ribosome	GO:0006412//translation
State 1,3,4 -vs- State 1,3,5	SK1G00058774	1	3.12666e-140	1.3447e-136	BURP2	EAY96989.1 hypothetical protein OsI_18912 [Oryza sativa Indica Group]	-	-	-	-	-	-	-
State 1,3,4 -vs- State 1,3,5	SK1G00058890	1	1.4848e-16	2.40777e-14	XIP	XP_015639909.1 xylanase inhibitor protein 2-like [Oryza sativa Japonica Group]	Metabolism;Metabolism	Global and overview maps;Carbohydrate metabolism	ko01100//Metabolic pathways;ko00520//Amino sugar and nucleotide sugar metabolism	K01183;K01183	-	-	GO:0005975//carbohydrate metabolic process
State 1,3,4 -vs- State 1,3,5	SK1G00059023	3	4.18175e-09	2.9125e-07	AT5	XP_015640676.1 acyl transferase 5 [Oryza sativa Japonica Group]	-	-	-	-	-	GO:0016747//transferase activity, transferring acyl groups other than amino-acyl groups	-
State 1,3,4 -vs- State 1,3,5	SK1G00059153	1	2.32849e-36	1.25178e-33	CATHB2	KAF2930125.1 hypothetical protein DAI22_05g108800 [Oryza sativa Japonica Group]	-	-	-	-	-	GO:0004197//cysteine-type endopeptidase activity;GO:0008234//cysteine-type peptidase activity	GO:0006508//proteolysis;GO:0050790//regulation of catalytic activity
State 1,3,4 -vs- State 1,3,5	SK1G00059202	2	6.99261e-20	1.52271e-17	MAN5	AAV44080.1 hypothetical protein [Oryza sativa Japonica Group]	Metabolism;Metabolism	Global and overview maps;Carbohydrate metabolism	ko01100//Metabolic pathways;ko00051//Fructose and mannose metabolism	K19355;K19355	-	GO:0004553//hydrolase activity, hydrolyzing O-glycosyl compounds	GO:0071704//organic substance metabolic process
State 1,3,4 -vs- State 1,3,5	SK1G00059493	2	1.43119e-84	2.89656e-81	BANGLUC	XP_015639379.1 lichenase-2 [Oryza sativa Japonica Group]	-	-	-	-	-	GO:0004553//hydrolase activity, hydrolyzing O-glycosyl compounds	GO:0005975//carbohydrate metabolic process
State 1,3,4 -vs- State 1,3,5	SK1G00059554	5	9.46361e-09	6.28581e-07	BC1L4	EAY97880.1 hypothetical protein OsI_19799 [Oryza sativa Indica Group]	-	-	-	-	GO:0031225//anchored component of membrane	-	GO:0010215//cellulose microfibril organization
State 1,3,4 -vs- State 1,3,5	SK1G00059582	2	9.7386e-13	1.14357e-10	EBM	KAB8099291.1 hypothetical protein EE612_029281, partial [Oryza sativa]	-	-	-	-	-	GO:0004553//hydrolase activity, hydrolyzing O-glycosyl compounds	GO:0005975//carbohydrate metabolic process
State 1,3,4 -vs- State 1,3,5	SK1G00059620	3	8.57025e-13	1.01329e-10	cmbl	KAF0922958.1 hypothetical protein E2562_002187 [Oryza meyeriana var. granulata] [Oryza meyeriana]	-	-	-	-	GO:0005737//cytoplasm	GO:0003924//GTPase activity;GO:0005524//ATP binding;GO:0005525//GTP binding;GO:0008171//O-methyltransferase activity;GO:0008236//serine-type peptidase activity;GO:0016787//hydrolase activity;GO:0050097//methylaspartate mutase activity	GO:0006508//proteolysis;GO:0009102//biotin biosynthetic process;GO:0019069//viral capsid assembly;GO:0019670//anaerobic glutamate catabolic process;GO:0042254//ribosome biogenesis
State 1,3,4 -vs- State 1,3,5	SK1G00059646	3	3.38796e-10	2.78201e-08	FBA1	XP_015639252.1 fructose-bisphosphate aldolase 1, cytoplasmic [Oryza sativa Japonica Group]	Metabolism;Metabolism;Metabolism;Metabolism;Metabolism;Metabolism;Metabolism;Metabolism	Global and overview maps;Global and overview maps;Global and overview maps;Global and overview maps;Carbohydrate metabolism;Energy metabolism;Carbohydrate metabolism;Carbohydrate metabolism	ko01100//Metabolic pathways;ko01110//Biosynthesis of secondary metabolites;ko01200//Carbon metabolism;ko01230//Biosynthesis of amino acids;ko00010//Glycolysis / Gluconeogenesis;ko00710//Carbon fixation in photosynthetic organisms;ko00051//Fructose and mannose metabolism;ko00030//Pentose phosphate pathway	K01623;K01623;K01623;K01623;K01623;K01623;K01623;K01623	-	GO:0004332//fructose-bisphosphate aldolase activity;GO:0050371//tyrosine phenol-lyase activity	GO:0006096//glycolytic process;GO:0006570//tyrosine metabolic process
State 1,3,4 -vs- State 1,3,5	SK1G00059648	1	8.27183e-11	7.54909e-09	GIP2	EAY97992.1 hypothetical protein OsI_19909 [Oryza sativa Indica Group]	-	-	-	-	-	-	-
State 1,3,4 -vs- State 1,3,5	SK1G00059663	2	1.4906e-16	2.40777e-14	ATG18H	EEC79207.1 hypothetical protein OsI_19924 [Oryza sativa Indica Group]	-	-	-	-	-	GO:0004332//fructose-bisphosphate aldolase activity;GO:0005515//protein binding	GO:0006096//glycolytic process
State 1,3,4 -vs- State 1,3,5	SK1G00059781	2	5.23343e-17	8.91393e-15	--	EAY98123.1 hypothetical protein OsI_20041 [Oryza sativa Indica Group]	-	-	-	-	-	GO:0005515//protein binding	-
State 1,3,4 -vs- State 1,3,5	SK1G00059927	2	1.69151e-82	3.23323e-79	--	XP_015637839.1 universal stress protein PHOS32 isoform X2 [Oryza sativa Japonica Group]	-	-	-	-	-	-	-
State 1,3,4 -vs- State 1,3,5	SK1G00059967	5	3.05579e-17	5.41946e-15	RPL36C	XP_015640666.1 60S ribosomal protein L36-3 [Oryza sativa Japonica Group]	Genetic Information Processing	Translation	ko03010//Ribosome	K02920	GO:0005840//ribosome	GO:0003735//structural constituent of ribosome	GO:0006412//translation
State 1,3,4 -vs- State 1,3,5	SK1G00059983	2	6.09142e-13	7.25195e-11	PAH1	EAY98334.1 hypothetical protein OsI_20244 [Oryza sativa Indica Group]	Metabolism;Metabolism;Metabolism;Metabolism	Global and overview maps;Global and overview maps;Lipid metabolism;Lipid metabolism	ko01100//Metabolic pathways;ko01110//Biosynthesis of secondary metabolites;ko00564//Glycerophospholipid metabolism;ko00561//Glycerolipid metabolism	K15728;K15728;K15728;K15728	-	-	-
State 1,3,4 -vs- State 1,3,5	SK1G00060069	5	5.62363e-09	3.86201e-07	RPS26	XP_015640325.1 40S ribosomal protein S26-like [Oryza sativa Japonica Group]	Genetic Information Processing	Translation	ko03010//Ribosome	K02976	GO:0005840//ribosome	GO:0003735//structural constituent of ribosome	GO:0006412//translation
State 1,3,4 -vs- State 1,3,5	SK1G00060151	2	6.98843e-100	1.71746e-96	BZIP24	EAY98546.1 hypothetical protein OsI_20459 [Oryza sativa Indica Group]	-	-	-	-	-	GO:0003677//DNA binding;GO:0003700//transcription factor activity, sequence-specific DNA binding	GO:0006355//regulation of transcription, DNA-templated
State 1,3,4 -vs- State 1,3,5	SK1G00060160	3	1.05385e-08	6.98625e-07	CYP98A1	XP_015639951.1 cytochrome P450 98A1 [Oryza sativa Japonica Group]	Metabolism;Metabolism;Metabolism;Metabolism;Metabolism	Global and overview maps;Global and overview maps;Biosynthesis of other secondary metabolites;Biosynthesis of other secondary metabolites;Biosynthesis of other secondary metabolites	ko01100//Metabolic pathways;ko01110//Biosynthesis of secondary metabolites;ko00940//Phenylpropanoid biosynthesis;ko00941//Flavonoid biosynthesis;ko00945//Stilbenoid, diarylheptanoid and gingerol biosynthesis	K09754;K09754;K09754;K09754;K09754	-	GO:0005506//iron ion binding;GO:0016705//oxidoreductase activity, acting on paired donors, with incorporation or reduction of molecular oxygen;GO:0020037//heme binding	GO:0055114//oxidation-reduction process
State 1,3,4 -vs- State 1,3,5	SK1G00060182	5	1.3949e-09	1.05247e-07	RPL30	XP_015638739.1 60S ribosomal protein L30 [Oryza sativa Japonica Group]	Genetic Information Processing	Translation	ko03010//Ribosome	K02908	-	-	-
State 1,3,4 -vs- State 1,3,5	SK1G00060261	2	1.17816e-09	8.92856e-08	At1g34470	XP_015638748.1 probable magnesium transporter NIPA6 isoform X1 [Oryza sativa Japonica Group]	-	-	-	-	GO:0016021//integral component of membrane	GO:0015095//magnesium ion transmembrane transporter activity	GO:0015693//magnesium ion transport
State 1,3,4 -vs- State 1,3,5	SK1G00060368	2	1.35394e-12	1.56847e-10	IAA18	XP_015640491.1 auxin-responsive protein IAA18 isoform X2 [Oryza sativa Japonica Group]	Environmental Information Processing	Signal transduction	ko04075//Plant hormone signal transduction	K14484	-	-	-
State 1,3,4 -vs- State 1,3,5	SK1G00060408	2	3.03729e-36	1.60771e-33	--	XP_015638404.1 uncharacterized protein LOC4339412 [Oryza sativa Japonica Group]	-	-	-	-	-	-	-
State 1,3,4 -vs- State 1,3,5	SK1G00060487	2	1.8625e-21	4.45009e-19	At1g80170	XP_015640423.1 probable polygalacturonase At1g80170 [Oryza sativa Japonica Group]	Metabolism;Metabolism	Global and overview maps;Carbohydrate metabolism	ko01100//Metabolic pathways;ko00040//Pentose and glucuronate interconversions	K01213;K01213	-	GO:0004650//polygalacturonase activity	GO:0005975//carbohydrate metabolic process
State 1,3,4 -vs- State 1,3,5	SK1G00060564	5	3.81596e-09	2.68491e-07	RPL35AB	BAS95263.1 Os05g0555800, partial [Oryza sativa Japonica Group]	Genetic Information Processing	Translation	ko03010//Ribosome	K02917	GO:0005840//ribosome	GO:0003723//RNA binding;GO:0003735//structural constituent of ribosome	GO:0006364//rRNA processing;GO:0006412//translation
State 1,3,4 -vs- State 1,3,5	SK1G00060565	5	6.98641e-09	4.73178e-07	Os01g0679700	NP_001147066.1 60S ribosomal protein L37a isoform 2 [Zea mays]	Genetic Information Processing	Translation	ko03010//Ribosome	K02921	GO:0000315//organellar large ribosomal subunit;GO:0005840//ribosome;GO:0022625//cytosolic large ribosomal subunit	GO:0003735//structural constituent of ribosome;GO:0008270//zinc ion binding;GO:0051539//4 iron, 4 sulfur cluster binding;GO:0070283//radical SAM enzyme activity	GO:0006412//translation;GO:0015948//methanogenesis;GO:0035556//intracellular signal transduction;GO:0046500//S-adenosylmethionine metabolic process
State 1,3,4 -vs- State 1,3,5	SK1G00060566	2	4.10335e-15	5.76245e-13	NANA	XP_015640517.1 aspartic proteinase NANA, chloroplast [Oryza sativa Japonica Group]	-	-	-	-	-	-	-
State 1,3,4 -vs- State 1,3,5	SK1G00060608	2	4.50054e-31	1.77983e-28	DMP6	XP_015638419.1 protein DMP6 [Oryza sativa Japonica Group]	-	-	-	-	-	-	-
State 1,3,4 -vs- State 1,3,5	SK1G00060627	5	7.36821e-12	7.68214e-10	RPL18A	XP_015639994.1 60S ribosomal protein L18a-like [Oryza sativa Japonica Group]	Genetic Information Processing	Translation	ko03010//Ribosome	K02882	GO:0005840//ribosome	GO:0003735//structural constituent of ribosome	GO:0006412//translation
State 1,3,4 -vs- State 1,3,5	SK1G00060635	1	1.01002e-09	7.72241e-08	MPK7	XP_015639430.1 mitogen-activated protein kinase 7 [Oryza sativa Japonica Group]	-	-	-	-	-	GO:0004672//protein kinase activity;GO:0005524//ATP binding	GO:0006468//protein phosphorylation
State 1,3,4 -vs- State 1,3,5	SK1G00060641	2	5.87153e-77	9.18253e-74	Os05g0567100	XP_015639571.1 aspartic proteinase oryzasin-1 [Oryza sativa Japonica Group]	-	-	-	-	-	-	GO:0006629//lipid metabolic process
State 1,3,4 -vs- State 1,3,5	SK1G00060823	2	2.89407e-09	2.09188e-07	LOGL8	XP_015639529.1 probable cytokinin riboside 5'-monophosphate phosphoribohydrolase LOGL8 [Oryza sativa Japonica Group]	-	-	-	-	-	-	-
State 1,3,4 -vs- State 1,3,5	SK1G00060837	2	1.3759e-30	5.2599e-28	At4g32940	XP_015637807.1 vacuolar-processing enzyme [Oryza sativa Japonica Group]	-	-	-	-	-	GO:0008233//peptidase activity	GO:0006508//proteolysis
State 1,3,4 -vs- State 1,3,5	SK1G00060895	2	3.33362e-27	1.06201e-24	NAC087	XP_015647863.1 NAC domain-containing protein 87 [Oryza sativa Japonica Group]	-	-	-	-	-	GO:0003677//DNA binding	GO:0006355//regulation of transcription, DNA-templated
State 1,3,4 -vs- State 1,3,5	SK1G00061006	4	2.10043e-15	3.06217e-13	Os04g0179200	BAT03095.1 Os07g0664900 [Oryza sativa Japonica Group]	-	-	-	-	-	GO:0003677//DNA binding;GO:0003824//catalytic activity;GO:0003854//3-beta-hydroxy-delta5-steroid dehydrogenase activity;GO:0003978//UDP-glucose 4-epimerase activity;GO:0004316//3-oxoacyl-[acyl-carrier-protein] reductase (NADPH) activity;GO:0004488//methylenetetrahydrofolate dehydrogenase (NADP+) activity;GO:0004757//sepiapterin reductase activity;GO:0005515//protein binding;GO:0008667//2,3-dihydr…	GO:0000272//polysaccharide catabolic process;GO:0006012//galactose metabolic process;GO:0006633//fatty acid biosynthetic process;GO:0006694//steroid biosynthetic process;GO:0006729//tetrahydrobiopterin biosynthetic process;GO:0015995//chlorophyll biosynthetic process;GO:0055114//oxidation-reduction process
State 1,3,4 -vs- State 1,3,5	SK1G00061077	2	2.81082e-11	2.65684e-09	--	XP_015644890.1 uncharacterized protein LOC9270706 isoform X2 [Oryza sativa Japonica Group]	-	-	-	-	-	GO:0046983//protein dimerization activity	-
State 1,3,4 -vs- State 1,3,5	SK1G00061080	3	2.47521e-33	1.06452e-30	PER70	KAF2924500.1 hypothetical protein DAI22_07g272800 [Oryza sativa Japonica Group]	Metabolism;Metabolism;Metabolism	Global and overview maps;Global and overview maps;Biosynthesis of other secondary metabolites	ko01100//Metabolic pathways;ko01110//Biosynthesis of secondary metabolites;ko00940//Phenylpropanoid biosynthesis	K00430;K00430;K00430	-	GO:0004601//peroxidase activity;GO:0020037//heme binding	GO:0006979//response to oxidative stress;GO:0055114//oxidation-reduction process
State 1,3,4 -vs- State 1,3,5	SK1G00061082	5	6.85517e-14	8.608e-12	PRX112	XP_015647501.2 peroxidase 2 [Oryza sativa Japonica Group]	Metabolism;Metabolism;Metabolism	Global and overview maps;Global and overview maps;Biosynthesis of other secondary metabolites	ko01100//Metabolic pathways;ko01110//Biosynthesis of secondary metabolites;ko00940//Phenylpropanoid biosynthesis	K00430;K00430;K00430	-	GO:0003677//DNA binding;GO:0004601//peroxidase activity;GO:0008236//serine-type peptidase activity;GO:0020037//heme binding	GO:0006508//proteolysis;GO:0006979//response to oxidative stress;GO:0055114//oxidation-reduction process
State 1,3,4 -vs- State 1,3,5	SK1G00061090	2	7.60601e-14	9.51609e-12	AGAL3	XP_015646774.1 alpha-galactosidase 3 [Oryza sativa Japonica Group]	Metabolism;Metabolism;Metabolism;Metabolism;Metabolism	Global and overview maps;Lipid metabolism;Carbohydrate metabolism;Lipid metabolism;Glycan biosynthesis and metabolism	ko01100//Metabolic pathways;ko00561//Glycerolipid metabolism;ko00052//Galactose metabolism;ko00600//Sphingolipid metabolism;ko00603//Glycosphingolipid biosynthesis - globo and isoglobo series	K07407;K07407;K07407;K07407;K07407	-	GO:0004553//hydrolase activity, hydrolyzing O-glycosyl compounds	GO:0005975//carbohydrate metabolic process
State 1,3,4 -vs- State 1,3,5	SK1G00061201	2	4.96273e-13	5.9494e-11	MAPDA	EAZ05021.1 hypothetical protein OsI_27202 [Oryza sativa Indica Group]	Metabolism;Metabolism	Global and overview maps;Nucleotide metabolism	ko01100//Metabolic pathways;ko00230//Purine metabolism	K01488;K01488	-	GO:0004000//adenosine deaminase activity;GO:0016787//hydrolase activity;GO:0019239//deaminase activity	GO:0043101//purine-containing compound salvage
State 1,3,4 -vs- State 1,3,5	SK1G00061204	5	7.87126e-11	7.22182e-09	rps6	XP_015646376.1 40S ribosomal protein S6 [Oryza sativa Japonica Group]	Genetic Information Processing	Translation	ko03010//Ribosome	K02991	GO:0005840//ribosome	GO:0003735//structural constituent of ribosome	GO:0006412//translation
State 1,3,4 -vs- State 1,3,5	SK1G00061298	3	5.26397e-19	1.05298e-16	OsI_026085	P0C5D0.1 RecName: Full=1-Cys peroxiredoxin B; Short=1-Cys Prx B; AltName: Full=Thioredoxin peroxidase B [Oryza sativa Indica Group]	Metabolism;Metabolism;Metabolism	Global and overview maps;Global and overview maps;Biosynthesis of other secondary metabolites	ko01100//Metabolic pathways;ko01110//Biosynthesis of secondary metabolites;ko00940//Phenylpropanoid biosynthesis	K11188;K11188;K11188	-	GO:0016209//antioxidant activity;GO:0016491//oxidoreductase activity;GO:0051920//peroxiredoxin activity	GO:0006979//response to oxidative stress;GO:0055114//oxidation-reduction process
State 1,3,4 -vs- State 1,3,5	SK1G00061302	3	1.22093e-08	7.94092e-07	--	XP_015647316.1 uncharacterized protein LOC4344054 [Oryza sativa Japonica Group]	-	-	-	-	-	-	GO:0030163//protein catabolic process
State 1,3,4 -vs- State 1,3,5	SK1G00061314	5	2.39137e-09	1.74687e-07	CPN10	XP_015647372.1 10 kDa chaperonin, mitochondrial [Oryza sativa Japonica Group]	-	-	-	-	-	GO:0005524//ATP binding;GO:0016887//ATPase activity	GO:0006457//protein folding
State 1,3,4 -vs- State 1,3,5	SK1G00061514	5	1.7203e-12	1.947e-10	--	-	-	-	-	-	-	-	-
State 1,3,4 -vs- State 1,3,5	SK1G00061589	2	3.19853e-10	2.6454e-08	KMS2	KAB8106007.1 hypothetical protein EE612_040182 [Oryza sativa]	-	-	-	-	-	-	-
State 1,3,4 -vs- State 1,3,5	SK1G00061611	2	1.90993e-38	1.07726e-35	--	EEC82310.1 hypothetical protein OsI_26573 [Oryza sativa Indica Group]	-	-	-	-	-	GO:0004392//heme oxygenase (decyclizing) activity;GO:0016491//oxidoreductase activity;GO:0020037//heme binding;GO:0070967//coenzyme F420 binding	GO:0008150//biological_process;GO:0042167//heme catabolic process
State 1,3,4 -vs- State 1,3,5	SK1G00061640	2	8.8776e-13	1.04604e-10	MFSD12	XP_015647906.1 major facilitator superfamily domain-containing protein 12 isoform X1 [Oryza sativa Japonica Group]	-	-	-	-	GO:0016021//integral component of membrane	GO:0015486//glycoside-pentoside-hexuronide:cation symporter activity	GO:0006812//cation transport;GO:0008643//carbohydrate transport
State 1,3,4 -vs- State 1,3,5	SK1G00061731	2	5.55865e-29	1.91251e-26	ENT3	EEC82261.1 hypothetical protein OsI_26456 [Oryza sativa Indica Group]	-	-	-	-	GO:0016021//integral component of membrane	GO:0003964//RNA-directed DNA polymerase activity;GO:0005337//nucleoside transmembrane transporter activity	GO:0000373//Group II intron splicing;GO:1901642//nucleoside transmembrane transport
State 1,3,4 -vs- State 1,3,5	SK1G00061777	5	7.10668e-17	1.18122e-14	RPS11	XP_015636632.1 40S ribosomal protein S11 [Oryza sativa Japonica Group]	Genetic Information Processing	Translation	ko03010//Ribosome	K02949	GO:0005840//ribosome;GO:0022627//cytosolic small ribosomal subunit	GO:0003735//structural constituent of ribosome	GO:0006412//translation
State 1,3,4 -vs- State 1,3,5	SK1G00061879	5	8.11019e-16	1.22386e-13	RPL38A	XP_015617721.1 60S ribosomal protein L38 [Oryza sativa Japonica Group]	Genetic Information Processing	Translation	ko03010//Ribosome	K02923	GO:0005840//ribosome	GO:0003735//structural constituent of ribosome	GO:0006412//translation
State 1,3,4 -vs- State 1,3,5	SK1G00061954	5	1.74603e-12	1.96964e-10	RPL44	BAH93960.1 Os07g0523700 [Oryza sativa Japonica Group]	Genetic Information Processing	Translation	ko03010//Ribosome	K02929	GO:0005634//nucleus;GO:0005739//mitochondrion;GO:0005840//ribosome	GO:0003735//structural constituent of ribosome;GO:0003911//DNA ligase (NAD+) activity;GO:0004725//protein tyrosine phosphatase activity	GO:0006260//DNA replication;GO:0006281//DNA repair;GO:0006310//DNA recombination;GO:0006412//translation;GO:0045333//cellular respiration;GO:0050852//T cell receptor signaling pathway
State 1,3,4 -vs- State 1,3,5	SK1G00062030	2	1.43202e-13	1.77871e-11	DTX19	EEC82106.1 hypothetical protein OsI_26122 [Oryza sativa Indica Group]	-	-	-	-	GO:0016020//membrane	GO:0015238//drug transmembrane transporter activity;GO:0015297//antiporter activity;GO:0042910//xenobiotic transporter activity	GO:0006855//drug transmembrane transport;GO:0042493//response to drug;GO:0055085//transmembrane transport
State 1,3,4 -vs- State 1,3,5	SK1G00062145	5	2.00248e-12	2.22969e-10	NDKR	XP_015647142.1 nucleoside diphosphate kinase 1 [Oryza sativa Japonica Group]	Metabolism;Metabolism;Environmental Information Processing;Metabolism;Metabolism	Global and overview maps;Global and overview maps;Signal transduction;Nucleotide metabolism;Nucleotide metabolism	ko01100//Metabolic pathways;ko01110//Biosynthesis of secondary metabolites;ko04016//MAPK signaling pathway - plant;ko00230//Purine metabolism;ko00240//Pyrimidine metabolism	K00940;K00940;K00940;K00940;K00940	-	-	-
State 1,3,4 -vs- State 1,3,5	SK1G00024826	2	5.83959e-11	5.41555e-09	--	EEC82077.1 hypothetical protein OsI_26073 [Oryza sativa Indica Group]	-	-	-	-	-	-	-
State 1,3,4 -vs- State 1,3,5	SK1G00062306	3	6.98138e-44	4.61926e-41	PIP2-5	KAA3464971.1 Aquaporin-like protein [Gossypium australe]	-	-	-	-	GO:0016020//membrane	GO:0015267//channel activity	GO:0055085//transmembrane transport;GO:0071569//protein ufmylation
State 1,3,4 -vs- State 1,3,5	SK1G00062307	3	3.73343e-17	6.52042e-15	PIP2-1	XP_015646828.1 probable aquaporin PIP2-1 [Oryza sativa Japonica Group]	-	-	-	-	GO:0016020//membrane	GO:0003941//L-serine ammonia-lyase activity;GO:0015267//channel activity;GO:0051539//4 iron, 4 sulfur cluster binding	GO:0009063//cellular amino acid catabolic process;GO:0055085//transmembrane transport
State 1,3,4 -vs- State 1,3,5	SK1G00062862	5	3.67352e-09	2.58998e-07	RPS12	ABR25723.1 40S ribosomal protein S12 [Oryza sativa Indica Group]	Genetic Information Processing	Translation	ko03010//Ribosome	K02951	-	-	-
State 1,3,4 -vs- State 1,3,5	SK1G00063098	3	2.47206e-29	8.76842e-27	--	XP_015644950.1 non-specific lipid-transfer protein-like protein At2g13820 [Oryza sativa Japonica Group]	-	-	-	-	-	-	-
State 1,3,4 -vs- State 1,3,5	SK1G00063171	3	3.21238e-12	3.53116e-10	TRXH	XP_015647572.1 thioredoxin H1 [Oryza sativa Japonica Group]	-	-	-	-	GO:0005737//cytoplasm;GO:0046540//U4/U6 x U5 tri-snRNP complex	GO:0003756//protein disulfide isomerase activity;GO:0015036//disulfide oxidoreductase activity;GO:0016209//antioxidant activity;GO:0016491//oxidoreductase activity	GO:0000398//mRNA splicing, via spliceosome;GO:0006457//protein folding;GO:0055114//oxidation-reduction process
State 1,3,4 -vs- State 1,3,5	SK1G00063315	2	2.64916e-10	2.2231e-08	AAP6	KAB8104238.1 hypothetical protein EE612_036981 [Oryza sativa]	-	-	-	-	-	-	-
State 1,3,4 -vs- State 1,3,5	SK1G00063347	5	2.65598e-13	3.22903e-11	--	BAC45057.1 unknown protein [Oryza sativa Japonica Group]	-	-	-	-	GO:0005840//ribosome	GO:0003735//structural constituent of ribosome	GO:0006412//translation
State 1,3,4 -vs- State 1,3,5	SK1G00063644	2	1.07831e-17	1.97342e-15	SCPL51	XP_015650054.1 serine carboxypeptidase-like 51 [Oryza sativa Japonica Group]	-	-	-	-	-	GO:0004185//serine-type carboxypeptidase activity	GO:0006508//proteolysis
State 1,3,4 -vs- State 1,3,5	SK1G00063653	5	4.14656e-17	7.16916e-15	RPS25B	XP_015649393.1 40S ribosomal protein S25-2 [Oryza sativa Japonica Group]	Genetic Information Processing	Translation	ko03010//Ribosome	K02975	-	GO:0003700//transcription factor activity, sequence-specific DNA binding	GO:0006355//regulation of transcription, DNA-templated
State 1,3,4 -vs- State 1,3,5	SK1G00063675	2	6.81507e-137	2.60533e-133	CEP1	BAT06657.1 Os08g0556900 [Oryza sativa Japonica Group]	-	-	-	-	-	GO:0008234//cysteine-type peptidase activity	GO:0006508//proteolysis
State 1,3,4 -vs- State 1,3,5	SK1G00063681	3	3.555e-15	5.05427e-13	FOLB2	XP_015648276.1 dihydroneopterin aldolase 2 [Oryza sativa Japonica Group]	Metabolism;Metabolism	Global and overview maps;Metabolism of cofactors and vitamins	ko01100//Metabolic pathways;ko00790//Folate biosynthesis	K01633;K01633	GO:0005840//ribosome	GO:0003735//structural constituent of ribosome;GO:0004150//dihydroneopterin aldolase activity	GO:0006412//translation;GO:0006760//folic acid-containing compound metabolic process
State 1,3,4 -vs- State 1,3,5	SK1G00063743	2	1.82154e-19	3.79471e-17	MYB1	EAZ07904.1 hypothetical protein OsI_30160 [Oryza sativa Indica Group]	-	-	-	-	GO:0005634//nucleus	GO:0003676//nucleic acid binding;GO:0005524//ATP binding;GO:0016818//hydrolase activity, acting on acid anhydrides, in phosphorus-containing anhydrides	GO:0006338//chromatin remodeling
State 1,3,4 -vs- State 1,3,5	SK1G00063890	5	3.82255e-18	7.18681e-16	RPL32A	BAF24202.2 Os08g0524600, partial [Oryza sativa Japonica Group]	Genetic Information Processing	Translation	ko03010//Ribosome	K02912	GO:0005840//ribosome	GO:0003735//structural constituent of ribosome	GO:0006412//translation
State 1,3,4 -vs- State 1,3,5	SK1G00063943	2	1.10584e-25	3.11866e-23	ORP4B	XP_015648359.1 oxysterol-binding protein-related protein 4B isoform X1 [Oryza sativa Japonica Group]	-	-	-	-	-	GO:0008289//lipid binding	-
State 1,3,4 -vs- State 1,3,5	SK1G00064085	2	2.36537e-09	1.73155e-07	At1g55760	XP_015651038.1 BTB/POZ domain-containing protein At1g55760 [Oryza sativa Japonica Group]	-	-	-	-	-	GO:0005515//protein binding	-
State 1,3,4 -vs- State 1,3,5	SK1G00064163	1	1.21963e-10	1.0843e-08	--	XP_015648834.1 mavicyanin [Oryza sativa Japonica Group]	-	-	-	-	-	GO:0005507//copper ion binding;GO:0009055//electron carrier activity;GO:0016491//oxidoreductase activity	GO:0055114//oxidation-reduction process
State 1,3,4 -vs- State 1,3,5	SK1G00064262	2	1.28866e-08	8.34986e-07	GAD	XP_015650124.1 glutamate decarboxylase 1 isoform X2 [Oryza sativa Japonica Group]	Metabolism;Metabolism;Metabolism;Metabolism;Metabolism;Metabolism	Global and overview maps;Global and overview maps;Amino acid metabolism;Metabolism of other amino acids;Carbohydrate metabolism;Metabolism of other amino acids	ko01100//Metabolic pathways;ko01110//Biosynthesis of secondary metabolites;ko00250//Alanine, aspartate and glutamate metabolism;ko00410//beta-Alanine metabolism;ko00650//Butanoate metabolism;ko00430//Taurine and hypotaurine metabolism	K01580;K01580;K01580;K01580;K01580;K01580	-	GO:0004351//glutamate decarboxylase activity;GO:0004837//tyrosine decarboxylase activity;GO:0016831//carboxy-lyase activity;GO:0030170//pyridoxal phosphate binding	GO:0006540//glutamate decarboxylation to succinate;GO:0015940//pantothenate biosynthetic process;GO:0019752//carboxylic acid metabolic process;GO:0051188//cofactor biosynthetic process
State 1,3,4 -vs- State 1,3,5	SK1G00064329	2	3.02499e-10	2.51396e-08	--	EAZ07175.1 hypothetical protein OsI_29420 [Oryza sativa Indica Group]	-	-	-	-	-	-	-
State 1,3,4 -vs- State 1,3,5	SK1G00064342	2	2.81986e-30	1.03213e-27	FLZ6	EEC83665.1 hypothetical protein OsI_29437 [Oryza sativa Indica Group]	-	-	-	-	-	GO:0008270//zinc ion binding	-
State 1,3,4 -vs- State 1,3,5	SK1G00064400	3	3.85078e-09	2.70388e-07	GF14C	EAZ07074.1 hypothetical protein OsI_29320 [Oryza sativa Indica Group]	-	-	-	-	GO:0019028//viral capsid	GO:0005198//structural molecule activity	-
State 1,3,4 -vs- State 1,3,5	SK1G00064429	2	2.96777e-60	2.91741e-57	RNS3	EAZ07095.1 hypothetical protein OsI_29344 [Oryza sativa Indica Group]	-	-	-	-	-	GO:0003723//RNA binding;GO:0033897//ribonuclease T2 activity	-
State 1,3,4 -vs- State 1,3,5	SK1G00064602	4	3.11658e-12	3.43683e-10	--	BAH94290.1 Os08g0395700 [Oryza sativa Japonica Group]	-	-	-	-	-	GO:0003968//RNA-directed RNA polymerase activity;GO:0004197//cysteine-type endopeptidase activity;GO:0004252//serine-type endopeptidase activity;GO:0017111//nucleoside-triphosphatase activity	GO:0030436//asexual sporulation
State 1,3,4 -vs- State 1,3,5	SK1G00064811	5	8.2937e-12	8.59497e-10	OsI_027940	KAF0899951.1 hypothetical protein E2562_025897 [Oryza meyeriana var. granulata] [Oryza meyeriana]	-	-	-	-	-	GO:0004568//chitinase activity;GO:0008134//transcription factor binding;GO:0019904//protein domain specific binding	GO:0006032//chitin catabolic process
State 1,3,4 -vs- State 1,3,5	SK1G00064955	5	6.09991e-12	6.41815e-10	FLA2	XP_015650763.1 fasciclin-like arabinogalactan protein 1 [Oryza sativa Japonica Group]	-	-	-	-	-	-	-
State 1,3,4 -vs- State 1,3,5	SK1G00064986	5	6.15767e-17	1.02845e-14	RPL7A-1	XP_015611976.1 60S ribosomal protein L7a-2 [Oryza sativa Japonica Group]	Genetic Information Processing	Translation	ko03010//Ribosome	K02936	GO:0016021//integral component of membrane	-	-
State 1,3,4 -vs- State 1,3,5	SK1G00065574	2	1.27187e-207	1.45867e-203	Os08g0189400	RWR75979.1 putative germin-like protein 2-1 [Cinnamomum micranthum f. kanehirae]	-	-	-	-	-	GO:0003677//DNA binding;GO:0003922//GMP synthase (glutamine-hydrolyzing) activity;GO:0005524//ATP binding;GO:0009036//Type II site-specific deoxyribonuclease activity;GO:0010309//acireductone dioxygenase [iron(II)-requiring] activity	GO:0006164//purine nucleotide biosynthetic process;GO:0006177//GMP biosynthetic process;GO:0006355//regulation of transcription, DNA-templated;GO:0009307//DNA restriction-modification system;GO:0055114//oxidation-reduction process
State 1,3,4 -vs- State 1,3,5	SK1G00065590	2	3.74462e-29	1.30139e-26	ATG8C	XP_006659199.1 PREDICTED: autophagy-related protein 8C [Oryza brachyantha]	Cellular Processes	Transport and catabolism	ko04136//Autophagy - other eukaryotes	K08341	GO:0005737//cytoplasm	-	GO:0000045//autophagosome assembly
State 1,3,4 -vs- State 1,3,5	SK1G00065736	2	2.47801e-14	3.35662e-12	DCL3A	XP_025883398.1 endoribonuclease Dicer homolog 3a-like [Oryza sativa Japonica Group]	-	-	-	-	-	GO:0003676//nucleic acid binding;GO:0003677//DNA binding;GO:0005524//ATP binding;GO:0016787//hydrolase activity	-
State 1,3,4 -vs- State 1,3,5	SK1G00065784	2	8.99203e-77	1.34513e-73	At3g47420	EAZ41565.1 hypothetical protein OsJ_26089 [Oryza sativa Japonica Group]	-	-	-	-	GO:0005887//integral component of plasma membrane;GO:0016021//integral component of membrane	GO:0015169//glycerol-3-phosphate transmembrane transporter activity;GO:0015307//drug:proton antiporter activity;GO:0022857//transmembrane transporter activity;GO:0042910//xenobiotic transporter activity	GO:0006855//drug transmembrane transport;GO:0015794//glycerol-3-phosphate transport;GO:0042493//response to drug;GO:0042908//xenobiotic transport;GO:0055085//transmembrane transport
State 1,3,4 -vs- State 1,3,5	SK1G00065792	3	8.67642e-33	3.5937e-30	COMT	XP_015650053.1 flavone 3'-O-methyltransferase 1 [Oryza sativa Japonica Group]	-	-	-	-	-	GO:0008168//methyltransferase activity;GO:0008171//O-methyltransferase activity;GO:0046983//protein dimerization activity	GO:0006480//N-terminal protein amino acid methylation;GO:0016051//carbohydrate biosynthetic process
State 1,3,4 -vs- State 1,3,5	SK1G00065821	5	3.60301e-13	4.34965e-11	Os08g0130500	XP_015650041.1 60S acidic ribosomal protein P0 [Oryza sativa Japonica Group]	Genetic Information Processing	Translation	ko03010//Ribosome	K02941	-	-	GO:0042254//ribosome biogenesis
State 1,3,4 -vs- State 1,3,5	SK1G00065924	5	4.66146e-21	1.09103e-18	FRK2	EAZ05375.1 hypothetical protein OsI_27579 [Oryza sativa Indica Group]	Metabolism;Metabolism;Metabolism;Metabolism;Metabolism	Global and overview maps;Global and overview maps;Carbohydrate metabolism;Carbohydrate metabolism;Carbohydrate metabolism	ko01100//Metabolic pathways;ko01110//Biosynthesis of secondary metabolites;ko00500//Starch and sucrose metabolism;ko00520//Amino sugar and nucleotide sugar metabolism;ko00051//Fructose and mannose metabolism	K00847;K00847;K00847;K00847;K00847	-	GO:0004747//ribokinase activity;GO:0008662//1-phosphofructokinase activity;GO:0016773//phosphotransferase activity, alcohol group as acceptor;GO:0047590//5-dehydro-2-deoxygluconokinase activity	GO:0009244//lipopolysaccharide core region biosynthetic process;GO:0019303//D-ribose catabolic process;GO:0019310//inositol catabolic process
State 1,3,4 -vs- State 1,3,5	SK1G00065947	5	1.53247e-25	4.28669e-23	RPP1A	KAF2917825.1 hypothetical protein DAI22_08g012100 [Oryza sativa Japonica Group]	Genetic Information Processing	Translation	ko03010//Ribosome	K02942	-	-	GO:0009291//unidirectional conjugation
State 1,3,4 -vs- State 1,3,5	SK1G00065953	5	4.10151e-09	2.8624e-07	Os08g0117300	XP_015649875.1 40S ribosomal protein S13-2 [Oryza sativa Japonica Group]	Genetic Information Processing	Translation	ko03010//Ribosome	K02953	GO:0000314//organellar small ribosomal subunit;GO:0005840//ribosome;GO:0022627//cytosolic small ribosomal subunit	GO:0003735//structural constituent of ribosome	GO:0006412//translation
State 1,3,4 -vs- State 1,3,5	SK1G00065954	5	5.80706e-09	3.98003e-07	Os08g0117300	XP_015649875.1 40S ribosomal protein S13-2 [Oryza sativa Japonica Group]	Genetic Information Processing	Translation	ko03010//Ribosome	K02953	GO:0000314//organellar small ribosomal subunit;GO:0005840//ribosome;GO:0022627//cytosolic small ribosomal subunit	GO:0003735//structural constituent of ribosome	GO:0006412//translation
State 1,3,4 -vs- State 1,3,5	SK1G00066002	3	8.51365e-24	2.16978e-21	GAPC1	XP_015650130.1 glyceraldehyde-3-phosphate dehydrogenase 1, cytosolic [Oryza sativa Japonica Group]	Metabolism;Metabolism;Metabolism;Metabolism;Metabolism;Metabolism	Global and overview maps;Global and overview maps;Global and overview maps;Global and overview maps;Carbohydrate metabolism;Energy metabolism	ko01100//Metabolic pathways;ko01110//Biosynthesis of secondary metabolites;ko01200//Carbon metabolism;ko01230//Biosynthesis of amino acids;ko00010//Glycolysis / Gluconeogenesis;ko00710//Carbon fixation in photosynthetic organisms	K00134;K00134;K00134;K00134;K00134;K00134	-	GO:0004073//aspartate-semialdehyde dehydrogenase activity;GO:0004617//phosphoglycerate dehydrogenase activity;GO:0008839//4-hydroxy-tetrahydrodipicolinate reductase;GO:0016620//oxidoreductase activity, acting on the aldehyde or oxo group of donors, NAD or NADP as acceptor;GO:0047850//diaminopimelate dehydrogenase activity;GO:0048001//erythrose-4-phosphate dehydrogenase activity;GO:0050112//inosit…	GO:0006094//gluconeogenesis;GO:0006096//glycolytic process;GO:0006564//L-serine biosynthetic process;GO:0008615//pyridoxine biosynthetic process;GO:0009085//lysine biosynthetic process;GO:0009086//methionine biosynthetic process;GO:0009088//threonine biosynthetic process;GO:0009089//lysine biosynthetic process via diaminopimelate;GO:0009097//isoleucine biosynthetic process;GO:0019310//inositol ca…
State 1,3,4 -vs- State 1,3,5	SK1G00066005	1	1.26057e-34	6.10859e-32	LHT1	XP_015649754.1 lysine histidine transporter 1 [Oryza sativa Japonica Group]	-	-	-	-	-	-	-
State 1,3,4 -vs- State 1,3,5	SK1G00066015	5	2.21916e-10	1.8946e-08	RPL37A	EEC82850.1 hypothetical protein OsI_27679 [Oryza sativa Indica Group]	Genetic Information Processing	Translation	ko03010//Ribosome	K02922	GO:0005840//ribosome	GO:0003735//structural constituent of ribosome;GO:0033743//peptide-methionine (R)-S-oxide reductase activity	GO:0006412//translation;GO:0055114//oxidation-reduction process
State 1,3,4 -vs- State 1,3,5	SK1G00066017	3	9.82089e-10	7.52556e-08	GRP-2	XP_015649739.1 glycine-rich protein 2 [Oryza sativa Japonica Group]	-	-	-	-	-	GO:0003676//nucleic acid binding;GO:0008270//zinc ion binding	GO:0008156//negative regulation of DNA replication;GO:0009409//response to cold
State 1,3,4 -vs- State 1,3,5	SK1G00066023	5	1.25212e-12	1.46036e-10	--	XP_015649745.1 uncharacterized protein LOC9266083 [Oryza sativa Japonica Group]	-	-	-	-	-	-	-
State 1,3,4 -vs- State 1,3,5	SK1G00066068	2	2.39285e-24	6.237e-22	DMP3	EAZ05316.1 hypothetical protein OsI_27521 [Oryza sativa Indica Group]	-	-	-	-	-	-	-
State 1,3,4 -vs- State 1,3,5	SK1G00066086	3	1.54278e-11	1.54304e-09	SAC1	EEC82791.1 hypothetical protein OsI_27545 [Oryza sativa Indica Group]	Metabolism;Metabolism	Global and overview maps;Carbohydrate metabolism	ko01100//Metabolic pathways;ko00562//Inositol phosphate metabolism	K22913;K22913	-	GO:0004024//alcohol dehydrogenase activity, zinc-dependent;GO:0008270//zinc ion binding;GO:0008743//L-threonine 3-dehydrogenase activity;GO:0016491//oxidoreductase activity;GO:0016655//oxidoreductase activity, acting on NAD(P)H, quinone or similar compound as acceptor;GO:0016779//nucleotidyltransferase activity;GO:0018467//formaldehyde dehydrogenase activity;GO:0042578//phosphoric ester hydrolase…	GO:0006113//fermentation;GO:0006567//threonine catabolic process;GO:0006813//potassium ion transport;GO:0008152//metabolic process;GO:0009228//thiamine biosynthetic process;GO:0009404//toxin metabolic process;GO:0010127//mycothiol-dependent detoxification;GO:0019439//aromatic compound catabolic process;GO:0030494//bacteriochlorophyll biosynthetic process;GO:0046292//formaldehyde metabolic process…
State 1,3,4 -vs- State 1,3,5	SK1G00075097	2	4.10334e-12	4.42569e-10	SPL	XP_015621818.1 sphingosine-1-phosphate lyase [Oryza sativa Japonica Group]	Metabolism;Metabolism	Global and overview maps;Lipid metabolism	ko01100//Metabolic pathways;ko00600//Sphingolipid metabolism	K01634;K01634	-	GO:0004351//glutamate decarboxylase activity;GO:0004837//tyrosine decarboxylase activity;GO:0016831//carboxy-lyase activity;GO:0030170//pyridoxal phosphate binding;GO:0031071//cysteine desulfurase activity	GO:0006540//glutamate decarboxylation to succinate;GO:0009058//biosynthetic process;GO:0015940//pantothenate biosynthetic process;GO:0016226//iron-sulfur cluster assembly;GO:0019752//carboxylic acid metabolic process;GO:0051188//cofactor biosynthetic process
State 1,3,4 -vs- State 1,3,5	SK1G00074855	3	5.73657e-12	6.073e-10	OsI_17983	XP_015634469.1 casparian strip membrane protein 1 [Oryza sativa Japonica Group]	-	-	-	-	-	-	-
State 1,3,4 -vs- State 1,3,5	SK1G00074998	3	6.89433e-10	5.41567e-08	ABCB20	EEC72270.1 hypothetical protein OsI_05426 [Oryza sativa Indica Group]	Environmental Information Processing	Membrane transport	ko02010//ABC transporters	K05658	GO:0005575//cellular_component;GO:0005737//cytoplasm;GO:0005887//integral component of plasma membrane;GO:0009380//excinuclease repair complex;GO:0009898//cytoplasmic side of plasma membrane;GO:0016020//membrane;GO:0016021//integral component of membrane;GO:0043190//ATP-binding cassette (ABC) transporter complex;GO:0055051//ATP-binding cassette (ABC) transporter complex, integrated substrate bind…	GO:0003924//GTPase activity;GO:0004020//adenylylsulfate kinase activity;GO:0004140//dephospho-CoA kinase activity;GO:0005260//channel-conductance-controlling ATPase activity;GO:0005319//lipid transporter activity;GO:0005524//ATP binding;GO:0005525//GTP binding;GO:0008565//protein transporter activity;GO:0009381//excinuclease ABC activity;GO:0015220//choline transmembrane transporter activity;GO:0…	GO:0000910//cytokinesis;GO:0006289//nucleotide-excision repair;GO:0006790//sulfur compound metabolic process;GO:0006810//transport;GO:0006817//phosphate ion transport;GO:0006824//cobalt ion transport;GO:0006855//drug transmembrane transport;GO:0006869//lipid transport;GO:0007186//G-protein coupled receptor signaling pathway;GO:0007601//visual perception;GO:0008150//biological_process;GO:0008272//…
State 1,3,4 -vs- State 1,3,5	SK1G00075081	5	3.10867e-09	2.23292e-07	--	KAF3342123.1 hypothetical protein FCM35_KLT00761 [Carex littledalei]	-	-	-	-	-	-	-
State 1,2 -vs- State 1,3,4,5	SK1G00039780	1	3.42448e-10	1.32481e-07	ILK1	XP_015628917.1 integrin-linked protein kinase 1 isoform X1 [Oryza sativa Japonica Group]	-	-	-	-	-	GO:0004672//protein kinase activity;GO:0005515//protein binding;GO:0005524//ATP binding	GO:0006468//protein phosphorylation
State 1,2 -vs- State 1,3,4,5	SK1G00040234	4	3.59346e-10	1.37474e-07	EXPA2	XP_015625064.1 expansin-A2 [Oryza sativa Japonica Group]	-	-	-	-	-	-	-
State 1,2 -vs- State 1,3,4,5	SK1G00040581	1	8.40193e-51	2.22528e-47	GSTF2	XP_015614423.1 probable glutathione S-transferase GSTF2 [Oryza sativa Japonica Group]	Metabolism;Metabolism	Global and overview maps;Metabolism of other amino acids	ko01100//Metabolic pathways;ko00480//Glutathione metabolism	K00799;K00799	-	GO:0005515//protein binding;GO:0016034//maleylacetoacetate isomerase activity;GO:0016614//oxidoreductase activity, acting on CH-OH group of donors	GO:0006559//L-phenylalanine catabolic process;GO:0006572//tyrosine catabolic process;GO:0006749//glutathione metabolic process;GO:0055114//oxidation-reduction process
State 1,2 -vs- State 1,3,4,5	SK1G00041130	1	1.18966e-12	6.11362e-10	--	EAY75369.1 hypothetical protein OsI_03265 [Oryza sativa Indica Group]	-	-	-	-	GO:0005576//extracellular region;GO:0005666//DNA-directed RNA polymerase III complex;GO:0016021//integral component of membrane	GO:0003677//DNA binding;GO:0005219//ryanodine-sensitive calcium-release channel activity;GO:0008200//ion channel inhibitor activity;GO:0046872//metal ion binding	GO:0006270//DNA replication initiation;GO:0006383//transcription from RNA polymerase III promoter;GO:0006874//cellular calcium ion homeostasis;GO:0009405//pathogenesis
State 1,2 -vs- State 1,3,4,5	SK1G00042367	4	1.12927e-61	4.86024e-58	SALT	A2WPN7.2 RecName: Full=Salt stress-induced protein; Short=Salt protein; AltName: Full=Protein lectin-like; AltName: Full=Protein mannose-binding lectin [Oryza sativa Indica Group]	-	-	-	-	-	-	-
State 1,2 -vs- State 1,3,4,5	SK1G00042577	2	8.75024e-16	7.0065e-13	--	EEC70494.1 hypothetical protein OsI_01568 [Oryza sativa Indica Group]	-	-	-	-	-	GO:0003824//catalytic activity	-
State 1,2 -vs- State 1,3,4,5	SK1G00042830	1	1.16092e-28	1.81689e-25	PER72	EAY73397.1 hypothetical protein OsI_01277 [Oryza sativa Indica Group]	Metabolism;Metabolism;Metabolism	Global and overview maps;Global and overview maps;Biosynthesis of other secondary metabolites	ko01100//Metabolic pathways;ko01110//Biosynthesis of secondary metabolites;ko00940//Phenylpropanoid biosynthesis	K00430;K00430;K00430	-	GO:0004601//peroxidase activity;GO:0020037//heme binding	GO:0006979//response to oxidative stress;GO:0055114//oxidation-reduction process
State 1,2 -vs- State 1,3,4,5	SK1G00043656	2	1.16693e-63	5.73978e-60	At1g51860	XP_015641418.1 probable LRR receptor-like serine/threonine-protein kinase At1g51860 isoform X4 [Oryza sativa Japonica Group]	-	-	-	-	GO:0005576//extracellular region	GO:0004672//protein kinase activity;GO:0004867//serine-type endopeptidase inhibitor activity;GO:0005515//protein binding;GO:0005524//ATP binding	GO:0006468//protein phosphorylation
State 1,2 -vs- State 1,3,4,5	SK1G00043699	2	1.23229e-49	3.03065e-46	WIP1	XP_015622812.1 Bowman-Birk type wound-induced proteinase inhibitor WIP1 [Oryza sativa Japonica Group]	-	-	-	-	GO:0005576//extracellular region	GO:0004867//serine-type endopeptidase inhibitor activity	-
State 1,2 -vs- State 1,3,4,5	SK1G00068537	2	4.98355e-11	2.35053e-08	LTP3	XP_015618724.1 non-specific lipid-transfer protein 1 [Oryza sativa Japonica Group]	-	-	-	-	-	GO:0003674//molecular_function	GO:0009306//protein secretion
State 1,2 -vs- State 1,3,4,5	SK1G00068658	2	2.32741e-16	2.10882e-13	PHOT1A	XP_015620213.1 phototropin-1A isoform X2 [Oryza sativa Japonica Group]	-	-	-	-	-	GO:0004672//protein kinase activity;GO:0004871//signal transducer activity;GO:0005515//protein binding;GO:0005524//ATP binding	GO:0006355//regulation of transcription, DNA-templated;GO:0006468//protein phosphorylation;GO:0007165//signal transduction
State 1,2 -vs- State 1,3,4,5	SK1G00069375	3	6.34093e-11	2.91099e-08	PLR_Lp1	EAY97063.1 hypothetical protein OsI_18984 [Oryza sativa Indica Group]	Metabolism;Metabolism	Global and overview maps;Biosynthesis of other secondary metabolites	ko01110//Biosynthesis of secondary metabolites;ko00998//Biosynthesis of various secondary metabolites - part 2	K21568;K21568	-	GO:0003824//catalytic activity;GO:0003854//3-beta-hydroxy-delta5-steroid dehydrogenase activity;GO:0003978//UDP-glucose 4-epimerase activity;GO:0016616//oxidoreductase activity, acting on the CH-OH group of donors, NAD or NADP as acceptor;GO:0016620//oxidoreductase activity, acting on the aldehyde or oxo group of donors, NAD or NADP as acceptor;GO:0016757//transferase activity, transferring glyco…	GO:0005975//carbohydrate metabolic process;GO:0006012//galactose metabolic process;GO:0006694//steroid biosynthetic process;GO:0055114//oxidation-reduction process
State 1,2 -vs- State 1,3,4,5	SK1G00069645	1	1.08807e-12	5.67627e-10	--	XP_015618742.1 uncharacterized protein LOC9272205 [Oryza sativa Japonica Group]	-	-	-	-	-	-	-
State 1,2 -vs- State 1,3,4,5	SK1G00069718	2	6.30537e-11	2.91099e-08	ZRP4	EAY82987.1 hypothetical protein OsI_38209 [Oryza sativa Indica Group]	-	-	-	-	-	GO:0008171//O-methyltransferase activity;GO:0046983//protein dimerization activity	-
State 1,2 -vs- State 1,3,4,5	SK1G00069865	1	7.57211e-11	3.30019e-08	UPS2	XP_015619370.1 ureide permease 2 isoform X1 [Oryza sativa Japonica Group]	-	-	-	-	GO:0016021//integral component of membrane	GO:0015144//carbohydrate transmembrane transporter activity	GO:0034219//carbohydrate transmembrane transport;GO:0071705//nitrogen compound transport
State 1,2 -vs- State 1,3,4,5	SK1G00070177	2	4.11758e-65	2.36287e-61	--	TVU18501.1 hypothetical protein EJB05_34604, partial [Eragrostis curvula]	-	-	-	-	-	GO:0004867//serine-type endopeptidase inhibitor activity	GO:0006915//apoptotic process;GO:0007050//cell cycle arrest;GO:0008285//negative regulation of cell proliferation;GO:0009611//response to wounding
State 1,2 -vs- State 1,3,4,5	SK1G00070180	2	7.29853e-39	1.47821e-35	--	XP_015618062.1 subtilisin-chymotrypsin inhibitor-2A [Oryza sativa Japonica Group]	-	-	-	-	-	GO:0004867//serine-type endopeptidase inhibitor activity	GO:0009611//response to wounding
State 1,2 -vs- State 1,3,4,5	SK1G00070230	3	5.38448e-12	2.64847e-09	MT4A	Q0IMG5.1 RecName: Full=Metallothionein-like protein 4A; AltName: Full=Class I metallothionein-like protein 4A; AltName: Full=OsMT-I-4a; AltName: Full=OsMT1b [Oryza sativa Japonica Group]	-	-	-	-	-	GO:0008270//zinc ion binding;GO:0046872//metal ion binding	-
State 1,2 -vs- State 1,3,4,5	SK1G00070589	2	1.56653e-10	6.42108e-08	YAB6	XP_015618575.1 protein YABBY 6 [Oryza sativa Japonica Group]	-	-	-	-	-	-	GO:0007275//multicellular organism development
State 1,2 -vs- State 1,3,4,5	SK1G00070847	1	3.27215e-209	5.63316e-205	EXPB2	XP_015614021.1 expansin-B2 [Oryza sativa Japonica Group]	-	-	-	-	-	-	-
State 1,2 -vs- State 1,3,4,5	SK1G00071166	1	1.4193e-13	8.14468e-11	GSTU6	XP_015613723.1 uncharacterized protein LOC4349190 [Oryza sativa Japonica Group]	Metabolism;Metabolism	Global and overview maps;Metabolism of other amino acids	ko01100//Metabolic pathways;ko00480//Glutathione metabolism	K00799;K00799	-	GO:0005515//protein binding;GO:0016034//maleylacetoacetate isomerase activity	GO:0006559//L-phenylalanine catabolic process;GO:0006572//tyrosine catabolic process;GO:0006749//glutathione metabolic process
State 1,2 -vs- State 1,3,4,5	SK1G00071198	1	6.88624e-11	3.07922e-08	Os10g0493600	BAT11450.1 Os10g0493600, partial [Oryza sativa Japonica Group]	Metabolism;Metabolism;Metabolism;Metabolism;Metabolism	Global and overview maps;Lipid metabolism;Carbohydrate metabolism;Lipid metabolism;Glycan biosynthesis and metabolism	ko01100//Metabolic pathways;ko00561//Glycerolipid metabolism;ko00052//Galactose metabolism;ko00600//Sphingolipid metabolism;ko00603//Glycosphingolipid biosynthesis - globo and isoglobo series	K07407;K07407;K07407;K07407;K07407	-	GO:0004553//hydrolase activity, hydrolyzing O-glycosyl compounds	GO:0005975//carbohydrate metabolic process
State 1,2 -vs- State 1,3,4,5	SK1G00072559	1	8.11312e-15	5.27062e-12	--	EAY77736.1 hypothetical protein OsI_32779 [Oryza sativa Indica Group]	-	-	-	-	-	-	-
State 1,2 -vs- State 1,3,4,5	SK1G00073130	3	8.09047e-11	3.48204e-08	--	EAZ08385.1 hypothetical protein OsI_30645 [Oryza sativa Indica Group]	-	-	-	-	-	-	-
State 1,2 -vs- State 1,3,4,5	SK1G00074357	2	4.51051e-13	2.42659e-10	BGLU29	EEC84793.1 hypothetical protein OsI_31851 [Oryza sativa Indica Group]	Metabolism;Metabolism;Metabolism;Metabolism;Metabolism	Global and overview maps;Global and overview maps;Biosynthesis of other secondary metabolites;Carbohydrate metabolism;Metabolism of other amino acids	ko01100//Metabolic pathways;ko01110//Biosynthesis of secondary metabolites;ko00940//Phenylpropanoid biosynthesis;ko00500//Starch and sucrose metabolism;ko00460//Cyanoamino acid metabolism	K01188;K01188;K01188;K01188;K01188	GO:0009341//beta-galactosidase complex	GO:0004553//hydrolase activity, hydrolyzing O-glycosyl compounds;GO:0004565//beta-galactosidase activity	GO:0005975//carbohydrate metabolic process;GO:0006012//galactose metabolic process;GO:0071704//organic substance metabolic process
State 1,2 -vs- State 1,3,4,5	SK1G00074577	2	8.92358e-23	1.05948e-19	--	EAZ09899.1 hypothetical protein OsI_32193 [Oryza sativa Indica Group]	-	-	-	-	-	GO:0003723//RNA binding;GO:0033897//ribonuclease T2 activity	-
State 1,2 -vs- State 1,3,4,5	SK1G00074651	2	2.8825e-09	9.82648e-07	PILS7	XP_015612647.1 protein PIN-LIKES 7 [Oryza sativa Japonica Group]	-	-	-	-	GO:0016021//integral component of membrane	-	GO:0055085//transmembrane transport
State 1,2 -vs- State 1,3,4,5	SK1G00043996	5	2.20246e-26	2.91665e-23	ILL3	OEL27225.1 IAA-amino acid hydrolase ILR1-like 8 [Dichanthelium oligosanthes]	-	-	-	-	-	GO:0004180//carboxypeptidase activity;GO:0004222//metalloendopeptidase activity;GO:0008777//acetylornithine deacetylase activity;GO:0009014//succinyl-diaminopimelate desuccinylase activity;GO:0016787//hydrolase activity	GO:0006508//proteolysis;GO:0006592//ornithine biosynthetic process;GO:0009089//lysine biosynthetic process via diaminopimelate
State 1,2 -vs- State 1,3,4,5	SK1G00044530	1	4.85541e-10	1.7976e-07	BACOVA_02659	XP_025879905.1 uncharacterized protein LOC4334116 isoform X1 [Oryza sativa Japonica Group]	Metabolism;Metabolism;Metabolism;Metabolism;Metabolism	Global and overview maps;Global and overview maps;Biosynthesis of other secondary metabolites;Carbohydrate metabolism;Metabolism of other amino acids	ko01100//Metabolic pathways;ko01110//Biosynthesis of secondary metabolites;ko00940//Phenylpropanoid biosynthesis;ko00500//Starch and sucrose metabolism;ko00460//Cyanoamino acid metabolism	K01188;K01188;K01188;K01188;K01188	-	GO:0004553//hydrolase activity, hydrolyzing O-glycosyl compounds	GO:0005975//carbohydrate metabolic process
State 1,2 -vs- State 1,3,4,5	SK1G00045944	4	5.64557e-60	2.15981e-56	3BETAHSD/D1	KAF0921362.1 hypothetical protein E2562_006935 [Oryza meyeriana var. granulata] [Oryza meyeriana]	Metabolism;Metabolism;Metabolism	Global and overview maps;Global and overview maps;Lipid metabolism	ko01100//Metabolic pathways;ko01110//Biosynthesis of secondary metabolites;ko00100//Steroid biosynthesis	K23558;K23558;K23558	-	GO:0003824//catalytic activity;GO:0003854//3-beta-hydroxy-delta5-steroid dehydrogenase activity;GO:0003978//UDP-glucose 4-epimerase activity;GO:0004043//L-aminoadipate-semialdehyde dehydrogenase activity;GO:0008460//dTDP-glucose 4,6-dehydratase activity;GO:0008712//ADP-glyceromanno-heptose 6-epimerase activity;GO:0008831//dTDP-4-dehydrorhamnose reductase activity;GO:0016616//oxidoreductase activi…	GO:0005975//carbohydrate metabolic process;GO:0006012//galactose metabolic process;GO:0006694//steroid biosynthetic process;GO:0009243//O antigen biosynthetic process;GO:0009244//lipopolysaccharide core region biosynthetic process;GO:0019305//dTDP-rhamnose biosynthetic process;GO:0019878//lysine biosynthetic process via aminoadipic acid;GO:0055114//oxidation-reduction process
State 1,2 -vs- State 1,3,4,5	SK1G00046198	1	3.90709e-16	3.36313e-13	DMP2	EAY90186.1 hypothetical protein OsI_11750 [Oryza sativa Indica Group]	-	-	-	-	-	-	-
State 1,2 -vs- State 1,3,4,5	SK1G00046344	5	4.06096e-10	1.53652e-07	--	XP_015629951.1 phylloplanin [Oryza sativa Japonica Group]	-	-	-	-	-	-	-
State 1,2 -vs- State 1,3,4,5	SK1G00046482	3	3.61792e-11	1.73012e-08	R40C1	XP_015631880.1 ricin B-like lectin R40C1 [Oryza sativa Japonica Group]	-	-	-	-	-	-	-
State 1,2 -vs- State 1,3,4,5	SK1G00046720	1	1.25767e-10	5.28083e-08	MT1B	XP_015628821.1 metallothionein-like protein 1B [Oryza sativa Japonica Group]	-	-	-	-	-	GO:0008270//zinc ion binding;GO:0046872//metal ion binding	-
State 1,2 -vs- State 1,3,4,5	SK1G00046979	1	4.07301e-14	2.50425e-11	Os03g0255100	KAB8091133.1 hypothetical protein EE612_016565 [Oryza sativa]	-	-	-	-	GO:0009341//beta-galactosidase complex	GO:0004553//hydrolase activity, hydrolyzing O-glycosyl compounds;GO:0004565//beta-galactosidase activity;GO:0030246//carbohydrate binding	GO:0005975//carbohydrate metabolic process
State 1,2 -vs- State 1,3,4,5	SK1G00046999	3	2.13761e-44	4.90666e-41	ARPN	XP_015629232.1 chemocyanin [Oryza sativa Japonica Group]	-	-	-	-	-	GO:0009055//electron carrier activity	-
State 1,2 -vs- State 1,3,4,5	SK1G00047124	1	3.56113e-21	4.08711e-18	--	XP_015629153.1 uncharacterized protein LOC4332235 [Oryza sativa Japonica Group]	-	-	-	-	-	-	-
State 1,2 -vs- State 1,3,4,5	SK1G00047328	1	2.16478e-09	7.45356e-07	At4g33820	EEE58525.1 hypothetical protein OsJ_09814 [Oryza sativa Japonica Group]	-	-	-	-	GO:0005575//cellular_component	GO:0003674//molecular_function;GO:0004553//hydrolase activity, hydrolyzing O-glycosyl compounds;GO:0016798//hydrolase activity, acting on glycosyl bonds	GO:0005975//carbohydrate metabolic process;GO:0008150//biological_process
State 1,2 -vs- State 1,3,4,5	SK1G00047475	1	4.64347e-10	1.73782e-07	TBT2	KAB8090544.1 hypothetical protein EE612_015738 [Oryza sativa]	-	-	-	-	-	GO:0016747//transferase activity, transferring acyl groups other than amino-acyl groups	-
State 1,2 -vs- State 1,3,4,5	SK1G00047502	2	2.70675e-20	3.00633e-17	At1g22440	EEC74659.1 hypothetical protein OsI_10323 [Oryza sativa Indica Group]	Metabolism;Metabolism;Metabolism;Metabolism;Metabolism;Metabolism	Global and overview maps;Global and overview maps;Global and overview maps;Carbohydrate metabolism;Lipid metabolism;Amino acid metabolism	ko01100//Metabolic pathways;ko01110//Biosynthesis of secondary metabolites;ko01200//Carbon metabolism;ko00010//Glycolysis / Gluconeogenesis;ko00071//Fatty acid degradation;ko00350//Tyrosine metabolism	K00121;K00121;K00121;K00121;K00121;K00121	-	GO:0004024//alcohol dehydrogenase activity, zinc-dependent;GO:0008270//zinc ion binding;GO:0008743//L-threonine 3-dehydrogenase activity;GO:0016491//oxidoreductase activity;GO:0016655//oxidoreductase activity, acting on NAD(P)H, quinone or similar compound as acceptor;GO:0018467//formaldehyde dehydrogenase activity;GO:0050607//mycothiol-dependent formaldehyde dehydrogenase activity;GO:0051287//NA…	GO:0006113//fermentation;GO:0006567//threonine catabolic process;GO:0008152//metabolic process;GO:0009404//toxin metabolic process;GO:0010127//mycothiol-dependent detoxification;GO:0019439//aromatic compound catabolic process;GO:0046292//formaldehyde metabolic process;GO:0055114//oxidation-reduction process
State 1,2 -vs- State 1,3,4,5	SK1G00047951	1	7.55116e-31	1.36839e-27	EXPB7	XP_015632130.1 expansin-B7 [Oryza sativa Japonica Group]	-	-	-	-	-	-	-
State 1,2 -vs- State 1,3,4,5	SK1G00047953	3	2.34201e-89	1.61276e-85	AZI1	XP_015632237.1 cortical cell-delineating protein [Oryza sativa Japonica Group]	-	-	-	-	-	GO:0004197//cysteine-type endopeptidase activity	GO:0043687//post-translational protein modification
State 1,2 -vs- State 1,3,4,5	SK1G00047954	1	1.4682e-28	2.1979e-25	AZI1	XP_015632237.1 cortical cell-delineating protein [Oryza sativa Japonica Group]	-	-	-	-	-	-	-
State 1,2 -vs- State 1,3,4,5	SK1G00047977	3	5.22609e-10	1.91425e-07	LSI2	XP_015632217.1 silicon efflux transporter LSI2 [Oryza sativa Japonica Group]	-	-	-	-	GO:0016021//integral component of membrane	GO:0015105//arsenite transmembrane transporter activity	GO:0015700//arsenite transport;GO:0046685//response to arsenic-containing substance;GO:0055085//transmembrane transport
State 1,2 -vs- State 1,3,4,5	SK1G00048106	1	7.46091e-16	6.11635e-13	PIP1-3	XP_015625572.1 aquaporin PIP 1-3 [Oryza sativa Japonica Group]	-	-	-	-	GO:0016020//membrane	GO:0015267//channel activity	GO:0055085//transmembrane transport
State 1,2 -vs- State 1,3,4,5	SK1G00048448	1	1.24325e-10	5.28083e-08	--	XP_015623261.1 uncharacterized protein LOC4330887 [Oryza sativa Japonica Group]	-	-	-	-	-	-	-
State 1,2 -vs- State 1,3,4,5	SK1G00048623	3	4.47375e-12	2.2324e-09	NIP2-1	XP_015626173.1 aquaporin NIP2-1 [Oryza sativa Japonica Group]	-	-	-	-	GO:0016020//membrane	GO:0015267//channel activity	GO:0055085//transmembrane transport
State 1,2 -vs- State 1,3,4,5	SK1G00049143	1	2.83142e-16	2.49971e-13	MFSD14A	EAY87003.1 hypothetical protein OsI_08398 [Oryza sativa Indica Group]	-	-	-	-	GO:0005887//integral component of plasma membrane	GO:0015295//solute:proton symporter activity;GO:0015514//nitrite efflux transmembrane transporter activity;GO:0022857//transmembrane transporter activity;GO:0042910//xenobiotic transporter activity	GO:0006810//transport;GO:0015707//nitrite transport;GO:0042908//xenobiotic transport;GO:0055085//transmembrane transport
State 1,2 -vs- State 1,3,4,5	SK1G00049176	3	3.22617e-29	5.28953e-26	EARLI1	TVU28924.1 hypothetical protein EJB05_20462, partial [Eragrostis curvula]	-	-	-	-	-	-	-
State 1,2 -vs- State 1,3,4,5	SK1G00049197	3	1.96563e-53	6.15261e-50	TIP2-1	XP_015623408.1 probable aquaporin TIP2-1 [Oryza sativa Japonica Group]	-	-	-	-	GO:0016020//membrane	GO:0015267//channel activity	GO:0055085//transmembrane transport
State 1,2 -vs- State 1,3,4,5	SK1G00049233	1	2.62906e-17	2.58632e-14	--	CAC39044.1 uclacyanin 3-like protein [Oryza sativa]	-	-	-	-	-	GO:0009055//electron carrier activity	GO:0006289//nucleotide-excision repair
State 1,2 -vs- State 1,3,4,5	SK1G00049422	3	6.45329e-11	2.9236e-08	--	KAB8087971.1 hypothetical protein EE612_012416, partial [Oryza sativa]	-	-	-	-	-	-	-
State 1,2 -vs- State 1,3,4,5	SK1G00049559	3	1.01544e-09	3.56763e-07	GAPC3	XP_015625382.1 glyceraldehyde-3-phosphate dehydrogenase 3, cytosolic [Oryza sativa Japonica Group]	Metabolism;Metabolism;Metabolism;Metabolism;Metabolism;Metabolism	Global and overview maps;Global and overview maps;Global and overview maps;Global and overview maps;Carbohydrate metabolism;Energy metabolism	ko01100//Metabolic pathways;ko01110//Biosynthesis of secondary metabolites;ko01200//Carbon metabolism;ko01230//Biosynthesis of amino acids;ko00010//Glycolysis / Gluconeogenesis;ko00710//Carbon fixation in photosynthetic organisms	K00134;K00134;K00134;K00134;K00134;K00134	-	GO:0004073//aspartate-semialdehyde dehydrogenase activity;GO:0004617//phosphoglycerate dehydrogenase activity;GO:0008839//4-hydroxy-tetrahydrodipicolinate reductase;GO:0016620//oxidoreductase activity, acting on the aldehyde or oxo group of donors, NAD or NADP as acceptor;GO:0047850//diaminopimelate dehydrogenase activity;GO:0048001//erythrose-4-phosphate dehydrogenase activity;GO:0050112//inosit…	GO:0006094//gluconeogenesis;GO:0006096//glycolytic process;GO:0006564//L-serine biosynthetic process;GO:0008615//pyridoxine biosynthetic process;GO:0009085//lysine biosynthetic process;GO:0009086//methionine biosynthetic process;GO:0009088//threonine biosynthetic process;GO:0009089//lysine biosynthetic process via diaminopimelate;GO:0009097//isoleucine biosynthetic process;GO:0019310//inositol ca…
State 1,2 -vs- State 1,3,4,5	SK1G00049822	1	3.0536e-52	8.76154e-49	CLC-C	BAF09057.2 Os02g0558100, partial [Oryza sativa Japonica Group]	-	-	-	-	GO:0016020//membrane	GO:0004122//cystathionine beta-synthase activity;GO:0005247//voltage-gated chloride channel activity	GO:0006821//chloride transport;GO:0019344//cysteine biosynthetic process;GO:0055085//transmembrane transport
State 1,2 -vs- State 1,3,4,5	SK1G00050516	3	8.30167e-10	2.94675e-07	NAAT1	BAF95202.1 nicotianamine aminotransferase [Oryza sativa Japonica Group]	-	-	-	-	GO:0005737//cytoplasm	GO:0003824//catalytic activity;GO:0003961//O-acetylhomoserine aminocarboxypropyltransferase activity;GO:0004015//adenosylmethionine-8-amino-7-oxononanoate transaminase activity;GO:0004124//cysteine synthase activity;GO:0004400//histidinol-phosphate transaminase activity;GO:0004553//hydrolase activity, hydrolyzing O-glycosyl compounds;GO:0004837//tyrosine decarboxylase activity;GO:0004838//L-tyros…	GO:0000105//histidine biosynthetic process;GO:0005975//carbohydrate metabolic process;GO:0006520//cellular amino acid metabolic process;GO:0006531//aspartate metabolic process;GO:0006559//L-phenylalanine catabolic process;GO:0006572//tyrosine catabolic process;GO:0008652//cellular amino acid biosynthetic process;GO:0009058//biosynthetic process;GO:0009086//methionine biosynthetic process;GO:00091…
State 1,2 -vs- State 1,3,4,5	SK1G00051490	4	1.88682e-13	1.065e-10	Os02g0139700	XP_015625479.2 cycloartenol synthase isoform X1 [Oryza sativa Japonica Group]	Metabolism;Metabolism;Metabolism	Global and overview maps;Global and overview maps;Lipid metabolism	ko01100//Metabolic pathways;ko01110//Biosynthesis of secondary metabolites;ko00100//Steroid biosynthesis	K01853;K01853;K01853	-	GO:0003824//catalytic activity;GO:0034073//tetrahymanol cyclase activity;GO:0051007//squalene-hopene cyclase activity	GO:0016114//terpenoid biosynthetic process;GO:0019746//hopanoid biosynthetic process
State 1,2 -vs- State 1,3,4,5	SK1G00051762	3	5.45612e-17	5.07729e-14	HAC1	EEC72290.1 hypothetical protein OsI_05463 [Oryza sativa Indica Group]	-	-	-	-	-	GO:0003824//catalytic activity	GO:0001887//selenium compound metabolic process;GO:0006400//tRNA modification;GO:0009228//thiamine biosynthetic process
State 1,2 -vs- State 1,3,4,5	SK1G00051841	1	1.77996e-14	1.13492e-11	CBP3	XP_015626272.1 serine carboxypeptidase 3 [Oryza sativa Japonica Group]	-	-	-	-	-	GO:0004185//serine-type carboxypeptidase activity	GO:0006508//proteolysis
State 1,2 -vs- State 1,3,4,5	SK1G00051852	5	3.86674e-18	4.16049e-15	CATA	XP_015625395.1 catalase isozyme A [Oryza sativa Japonica Group]	Metabolism;Metabolism;Metabolism;Environmental Information Processing;Cellular Processes;Metabolism;Metabolism	Global and overview maps;Global and overview maps;Global and overview maps;Signal transduction;Transport and catabolism;Carbohydrate metabolism;Amino acid metabolism	ko01100//Metabolic pathways;ko01110//Biosynthesis of secondary metabolites;ko01200//Carbon metabolism;ko04016//MAPK signaling pathway - plant;ko04146//Peroxisome;ko00630//Glyoxylate and dicarboxylate metabolism;ko00380//Tryptophan metabolism	K03781;K03781;K03781;K03781;K03781;K03781;K03781	-	GO:0004096//catalase activity;GO:0020037//heme binding	GO:0055114//oxidation-reduction process
State 1,2 -vs- State 1,3,4,5	SK1G00052770	1	0	0	CCP1	XP_015636152.1 cysteine proteinase 1 [Oryza sativa Japonica Group]	Organismal Systems	Environmental adaptation	ko04626//Plant-pathogen interaction	K01373	-	GO:0008234//cysteine-type peptidase activity	GO:0006508//proteolysis
State 1,2 -vs- State 1,3,4,5	SK1G00052886	2	6.68e-10	2.42104e-07	TPS7	XP_015634447.1 alpha-humulene synthase isoform X1 [Oryza sativa Japonica Group]	-	-	-	-	-	GO:0000287//magnesium ion binding;GO:0010333//terpene synthase activity;GO:0016829//lyase activity	-
State 1,2 -vs- State 1,3,4,5	SK1G00053349	3	1.14876e-37	2.19739e-34	PER72	EAY94133.1 hypothetical protein OsI_15906 [Oryza sativa Indica Group]	Metabolism;Metabolism;Metabolism	Global and overview maps;Global and overview maps;Biosynthesis of other secondary metabolites	ko01100//Metabolic pathways;ko01110//Biosynthesis of secondary metabolites;ko00940//Phenylpropanoid biosynthesis	K00430;K00430;K00430	-	GO:0004601//peroxidase activity;GO:0020037//heme binding	GO:0006979//response to oxidative stress;GO:0055114//oxidation-reduction process
State 1,2 -vs- State 1,3,4,5	SK1G00053694	2	1.59181e-10	6.44795e-08	BGLU10	PUZ47610.1 hypothetical protein GQ55_7G179900 [Panicum hallii var. hallii] [Panicum hallii]	Metabolism;Metabolism;Metabolism;Metabolism;Metabolism	Global and overview maps;Global and overview maps;Biosynthesis of other secondary metabolites;Carbohydrate metabolism;Metabolism of other amino acids	ko01100//Metabolic pathways;ko01110//Biosynthesis of secondary metabolites;ko00940//Phenylpropanoid biosynthesis;ko00500//Starch and sucrose metabolism;ko00460//Cyanoamino acid metabolism	K01188;K01188;K01188;K01188;K01188	GO:0009341//beta-galactosidase complex	GO:0004553//hydrolase activity, hydrolyzing O-glycosyl compounds;GO:0004565//beta-galactosidase activity;GO:0016491//oxidoreductase activity	GO:0005975//carbohydrate metabolic process;GO:0006012//galactose metabolic process;GO:0055114//oxidation-reduction process;GO:0071704//organic substance metabolic process
State 1,2 -vs- State 1,3,4,5	SK1G00054212	2	3.29917e-28	4.73307e-25	CYP87A3	RYR10712.1 hypothetical protein Ahy_B05g079190 isoform A [Arachis hypogaea]	-	-	-	-	-	GO:0005506//iron ion binding;GO:0016705//oxidoreductase activity, acting on paired donors, with incorporation or reduction of molecular oxygen;GO:0020037//heme binding	GO:0055114//oxidation-reduction process
State 1,2 -vs- State 1,3,4,5	SK1G00054293	5	3.99389e-30	6.87568e-27	LC	AAC49219.1 Ra [Oryza sativa]	-	-	-	-	-	GO:0046983//protein dimerization activity	-
State 1,2 -vs- State 1,3,4,5	SK1G00054955	1	1.32166e-15	9.89266e-13	Os04g0670200	XP_015636103.1 oryzain beta chain [Oryza sativa Japonica Group]	-	-	-	-	-	GO:0008234//cysteine-type peptidase activity	GO:0006508//proteolysis
State 1,2 -vs- State 1,3,4,5	SK1G00067314	5	3.81337e-15	2.73538e-12	At5g06060	XP_015616942.1 tropinone reductase homolog At5g06060 isoform X1 [Oryza sativa Japonica Group]	Metabolism;Metabolism;Metabolism	Global and overview maps;Global and overview maps;Biosynthesis of other secondary metabolites	ko01100//Metabolic pathways;ko01110//Biosynthesis of secondary metabolites;ko00960//Tropane, piperidine and pyridine alkaloid biosynthesis	K08081;K08081;K08081	-	GO:0003824//catalytic activity;GO:0004316//3-oxoacyl-[acyl-carrier-protein] reductase (NADPH) activity;GO:0004488//methylenetetrahydrofolate dehydrogenase (NADP+) activity;GO:0004757//sepiapterin reductase activity;GO:0008667//2,3-dihydro-2,3-dihydroxybenzoate dehydrogenase activity;GO:0008678//2-deoxy-D-gluconate 3-dehydrogenase activity;GO:0016491//oxidoreductase activity;GO:0016655//oxidoreduc…	GO:0000272//polysaccharide catabolic process;GO:0005975//carbohydrate metabolic process;GO:0006633//fatty acid biosynthetic process;GO:0006729//tetrahydrobiopterin biosynthetic process;GO:0008152//metabolic process;GO:0030436//asexual sporulation;GO:0055114//oxidation-reduction process
State 1,2 -vs- State 1,3,4,5	SK1G00067498	2	1.05323e-17	1.0989e-14	OMT2	EAY80724.1 hypothetical protein OsI_35906 [Oryza sativa Indica Group]	-	-	-	-	-	GO:0008171//O-methyltransferase activity;GO:0046983//protein dimerization activity	-
State 1,2 -vs- State 1,3,4,5	SK1G00067582	2	3.1267e-43	6.72845e-40	CYP87A3	EEC68024.1 hypothetical protein OsI_35831 [Oryza sativa Indica Group]	-	-	-	-	-	GO:0005506//iron ion binding;GO:0016705//oxidoreductase activity, acting on paired donors, with incorporation or reduction of molecular oxygen;GO:0020037//heme binding	GO:0055114//oxidation-reduction process
State 1,2 -vs- State 1,3,4,5	SK1G00067585	2	1.85684e-133	2.1311e-129	Os11g0285000	KAF2910510.1 hypothetical protein DAI22_11g105300 [Oryza sativa Japonica Group]	-	-	-	-	-	GO:0003824//catalytic activity;GO:0034073//tetrahymanol cyclase activity;GO:0051007//squalene-hopene cyclase activity	GO:0016114//terpenoid biosynthetic process;GO:0019746//hopanoid biosynthetic process
State 1,2 -vs- State 1,3,4,5	SK1G00055068	1	7.41427e-11	3.27283e-08	At5g47470	XP_025882163.1 WAT1-related protein At5g47470 [Oryza sativa Japonica Group]	-	-	-	-	GO:0016020//membrane;GO:0016021//integral component of membrane	-	-
State 1,2 -vs- State 1,3,4,5	SK1G00055494	1	1.89536e-10	7.41581e-08	At5g45910	EEE65121.1 hypothetical protein OsJ_20187 [Oryza sativa Japonica Group]	-	-	-	-	GO:0016592//mediator complex	GO:0003712//transcription cofactor activity;GO:0016788//hydrolase activity, acting on ester bonds	GO:0006357//regulation of transcription from RNA polymerase II promoter
State 1,2 -vs- State 1,3,4,5	SK1G00056084	1	1.0375e-13	6.15898e-11	PXG4	XP_015641088.1 probable peroxygenase 4 [Oryza sativa Japonica Group]	Metabolism	Lipid metabolism	ko00073//Cutin, suberine and wax biosynthesis	K17991	-	GO:0005509//calcium ion binding	-
State 1,2 -vs- State 1,3,4,5	SK1G00056911	3	1.8758e-10	7.41581e-08	PER52	XP_015643864.1 peroxidase P7 [Oryza sativa Japonica Group]	Metabolism;Metabolism;Metabolism	Global and overview maps;Global and overview maps;Biosynthesis of other secondary metabolites	ko01100//Metabolic pathways;ko01110//Biosynthesis of secondary metabolites;ko00940//Phenylpropanoid biosynthesis	K00430;K00430;K00430	-	GO:0004601//peroxidase activity;GO:0020037//heme binding	GO:0006979//response to oxidative stress;GO:0055114//oxidation-reduction process
State 1,2 -vs- State 1,3,4,5	SK1G00057123	1	1.12892e-15	8.83403e-13	HO1	XP_015643881.1 heme oxygenase 1, chloroplastic isoform X1 [Oryza sativa Japonica Group]	Metabolism;Metabolism;Metabolism	Global and overview maps;Global and overview maps;Metabolism of cofactors and vitamins	ko01100//Metabolic pathways;ko01110//Biosynthesis of secondary metabolites;ko00860//Porphyrin and chlorophyll metabolism	K21480;K21480;K21480	GO:0005576//extracellular region	GO:0003674//molecular_function;GO:0004392//heme oxygenase (decyclizing) activity	GO:0006788//heme oxidation;GO:0008150//biological_process;GO:0055114//oxidation-reduction process
State 1,2 -vs- State 1,3,4,5	SK1G00057259	1	7.46485e-15	5.04063e-12	At5g10770	XP_015641459.1 aspartyl protease family protein At5g10770 isoform X1 [Oryza sativa Japonica Group]	-	-	-	-	-	GO:0008201//heparin binding	-
State 1,2 -vs- State 1,3,4,5	SK1G00057696	1	1.42219e-103	1.22419e-99	B3GALT2	XP_015641593.1 probable beta-1,3-galactosyltransferase 2 [Oryza sativa Japonica Group]	-	-	-	-	GO:0016020//membrane	GO:0016757//transferase activity, transferring glycosyl groups;GO:0016758//transferase activity, transferring hexosyl groups	GO:0006260//DNA replication;GO:0006486//protein glycosylation;GO:0055114//oxidation-reduction process
State 1,2 -vs- State 1,3,4,5	SK1G00057749	2	1.92884e-15	1.41302e-12	--	KAB8103784.1 hypothetical protein EE612_036379 [Oryza sativa]	-	-	-	-	-	-	-
State 1,2 -vs- State 1,3,4,5	SK1G00058630	2	4.12296e-13	2.2533e-10	APS1	EAY96842.1 hypothetical protein OsI_18762 [Oryza sativa Indica Group]	-	-	-	-	-	-	-
State 1,2 -vs- State 1,3,4,5	SK1G00058774	5	4.59299e-56	1.58141e-52	BURP2	EAY96989.1 hypothetical protein OsI_18912 [Oryza sativa Indica Group]	-	-	-	-	-	-	-
State 1,2 -vs- State 1,3,4,5	SK1G00059493	1	1.4519e-17	1.47031e-14	BANGLUC	XP_015639379.1 lichenase-2 [Oryza sativa Japonica Group]	-	-	-	-	-	GO:0004553//hydrolase activity, hydrolyzing O-glycosyl compounds	GO:0005975//carbohydrate metabolic process
State 1,2 -vs- State 1,3,4,5	SK1G00059927	1	7.4663e-15	5.04063e-12	--	XP_015637839.1 universal stress protein PHOS32 isoform X2 [Oryza sativa Japonica Group]	-	-	-	-	-	-	-
State 1,2 -vs- State 1,3,4,5	SK1G00060071	5	1.02895e-11	4.98981e-09	EXPA4	AAB81662.1 expansin [Oryza sativa Indica Group]	-	-	-	-	-	-	-
State 1,2 -vs- State 1,3,4,5	SK1G00060480	3	1.08359e-12	5.67627e-10	RPL28A	XP_006654725.2 PREDICTED: 60S ribosomal protein L28-1-like [Oryza brachyantha]	Genetic Information Processing	Translation	ko03010//Ribosome	K02903	-	-	-
State 1,2 -vs- State 1,3,4,5	SK1G00060608	1	3.59071e-13	1.99406e-10	DMP6	XP_015638419.1 protein DMP6 [Oryza sativa Japonica Group]	-	-	-	-	-	-	-
State 1,2 -vs- State 1,3,4,5	SK1G00060641	1	4.07465e-15	2.86315e-12	Os05g0567100	XP_015639571.1 aspartic proteinase oryzasin-1 [Oryza sativa Japonica Group]	-	-	-	-	-	-	GO:0006629//lipid metabolic process
State 1,2 -vs- State 1,3,4,5	SK1G00061082	3	1.40961e-10	5.84752e-08	PRX112	XP_015647501.2 peroxidase 2 [Oryza sativa Japonica Group]	Metabolism;Metabolism;Metabolism	Global and overview maps;Global and overview maps;Biosynthesis of other secondary metabolites	ko01100//Metabolic pathways;ko01110//Biosynthesis of secondary metabolites;ko00940//Phenylpropanoid biosynthesis	K00430;K00430;K00430	-	GO:0003677//DNA binding;GO:0004601//peroxidase activity;GO:0008236//serine-type peptidase activity;GO:0020037//heme binding	GO:0006508//proteolysis;GO:0006979//response to oxidative stress;GO:0055114//oxidation-reduction process
State 1,2 -vs- State 1,3,4,5	SK1G00061611	1	1.26122e-13	7.3602e-11	--	EEC82310.1 hypothetical protein OsI_26573 [Oryza sativa Indica Group]	-	-	-	-	-	GO:0004392//heme oxygenase (decyclizing) activity;GO:0016491//oxidoreductase activity;GO:0020037//heme binding;GO:0070967//coenzyme F420 binding	GO:0008150//biological_process;GO:0042167//heme catabolic process
State 1,2 -vs- State 1,3,4,5	SK1G00061661	4	1.61071e-10	6.44866e-08	PLT5	EAZ04480.1 hypothetical protein OsI_26629 [Oryza sativa Indica Group]	-	-	-	-	GO:0005887//integral component of plasma membrane;GO:0016021//integral component of membrane	GO:0008028//monocarboxylic acid transmembrane transporter activity;GO:0015114//phosphate ion transmembrane transporter activity;GO:0015238//drug transmembrane transporter activity;GO:0015295//solute:proton symporter activity;GO:0022857//transmembrane transporter activity;GO:0042910//xenobiotic transporter activity;GO:0051119//sugar transmembrane transporter activity	GO:0006810//transport;GO:0006817//phosphate ion transport;GO:0008643//carbohydrate transport;GO:0015718//monocarboxylic acid transport;GO:0015893//drug transport;GO:0042908//xenobiotic transport;GO:0055085//transmembrane transport
State 1,2 -vs- State 1,3,4,5	SK1G00061838	5	7.82114e-10	2.8051e-07	At4g29360	XP_015647406.1 glucan endo-1,3-beta-glucosidase 12 [Oryza sativa Japonica Group]	-	-	-	-	-	GO:0004553//hydrolase activity, hydrolyzing O-glycosyl compounds	GO:0005975//carbohydrate metabolic process
State 1,2 -vs- State 1,3,4,5	SK1G00062306	1	1.90059e-14	1.18981e-11	PIP2-5	KAA3464971.1 Aquaporin-like protein [Gossypium australe]	-	-	-	-	GO:0016020//membrane	GO:0015267//channel activity	GO:0055085//transmembrane transport;GO:0071569//protein ufmylation
State 1,2 -vs- State 1,3,4,5	SK1G00063098	1	7.15235e-16	6.00641e-13	--	XP_015644950.1 non-specific lipid-transfer protein-like protein At2g13820 [Oryza sativa Japonica Group]	-	-	-	-	-	-	-
State 1,2 -vs- State 1,3,4,5	SK1G00063486	5	3.05177e-23	3.75269e-20	PRMS	XP_015644657.1 pathogenesis-related protein 1 [Oryza sativa Japonica Group]	Environmental Information Processing;Organismal Systems;Environmental Information Processing	Signal transduction;Environmental adaptation;Signal transduction	ko04075//Plant hormone signal transduction;ko04626//Plant-pathogen interaction;ko04016//MAPK signaling pathway - plant	K13449;K13449;K13449	-	-	-
State 1,2 -vs- State 1,3,4,5	SK1G00063675	1	1.21216e-15	9.2746e-13	CEP1	BAT06657.1 Os08g0556900 [Oryza sativa Japonica Group]	-	-	-	-	-	GO:0008234//cysteine-type peptidase activity	GO:0006508//proteolysis
State 1,2 -vs- State 1,3,4,5	SK1G00064429	1	7.92992e-15	5.25067e-12	RNS3	EAZ07095.1 hypothetical protein OsI_29344 [Oryza sativa Indica Group]	-	-	-	-	-	GO:0003723//RNA binding;GO:0033897//ribonuclease T2 activity	-
State 1,2 -vs- State 1,3,4,5	SK1G00064602	5	3.77474e-26	4.81363e-23	--	BAH94290.1 Os08g0395700 [Oryza sativa Japonica Group]	-	-	-	-	-	GO:0003968//RNA-directed RNA polymerase activity;GO:0004197//cysteine-type endopeptidase activity;GO:0004252//serine-type endopeptidase activity;GO:0017111//nucleoside-triphosphatase activity	GO:0030436//asexual sporulation
State 1,2 -vs- State 1,3,4,5	SK1G00064739	5	4.49074e-17	4.29502e-14	At2g25737	XP_015649996.1 sulfite exporter TauE/SafE family protein 3 [Oryza sativa Japonica Group]	-	-	-	-	GO:0016021//integral component of membrane	-	-
State 1,2 -vs- State 1,3,4,5	SK1G00065574	1	3.52484e-28	4.85454e-25	Os08g0189400	RWR75979.1 putative germin-like protein 2-1 [Cinnamomum micranthum f. kanehirae]	-	-	-	-	-	GO:0003677//DNA binding;GO:0003922//GMP synthase (glutamine-hydrolyzing) activity;GO:0005524//ATP binding;GO:0009036//Type II site-specific deoxyribonuclease activity;GO:0010309//acireductone dioxygenase [iron(II)-requiring] activity	GO:0006164//purine nucleotide biosynthetic process;GO:0006177//GMP biosynthetic process;GO:0006355//regulation of transcription, DNA-templated;GO:0009307//DNA restriction-modification system;GO:0055114//oxidation-reduction process
State 1,2 -vs- State 1,3,4,5	SK1G00065784	1	1.66831e-12	8.44729e-10	At3g47420	EAZ41565.1 hypothetical protein OsJ_26089 [Oryza sativa Japonica Group]	-	-	-	-	GO:0005887//integral component of plasma membrane;GO:0016021//integral component of membrane	GO:0015169//glycerol-3-phosphate transmembrane transporter activity;GO:0015307//drug:proton antiporter activity;GO:0022857//transmembrane transporter activity;GO:0042910//xenobiotic transporter activity	GO:0006855//drug transmembrane transport;GO:0015794//glycerol-3-phosphate transport;GO:0042493//response to drug;GO:0042908//xenobiotic transport;GO:0055085//transmembrane transport
State 1,2 -vs- State 1,3,4,5	SK1G00066005	4	1.35558e-09	4.71453e-07	LHT1	XP_015649754.1 lysine histidine transporter 1 [Oryza sativa Japonica Group]	-	-	-	-	-	-	-
State 1,2 -vs- State 1,3,4,5	SK1G00074855	3	4.36149e-14	2.63457e-11	OsI_17983	XP_015634469.1 casparian strip membrane protein 1 [Oryza sativa Japonica Group]	-	-	-	-	-	-	-
