# Supplementary material for: Multiomics analysis of the molecular and single-cell responses of rice after deep-space flight on Chang'e-5
Source: Research Square preprint supplement (doi:10.21203/rs.3.rs-7211908/v1), 2025-08-22
Supplement: Supplementary file 7 [file b05add8521da3d3eb5b6d5ea.xlsx]

## Sheet: Sheet1
Supplementary Data 5. m6A intergroup difference peaks.
Chr	Start	End	Name	Score	Strand	Length	Blockcount	Blocksizes	Blockstarts	Gene ID	CK.log2FC	TK.log2FC	diff.log2FC	Moddiff.log2FC	Pvalue	Adj.Pvalue	Lg.Pvalue	Lg.Adj.Pvalue
cluster1	66577	66627	MergePeak_14	0.167092	.	50	1	50	0	SK1G00039308	1.23754	2.48148	1.24393	0.0153947	0.0469468	0.890636	1.32839	0.0502997
cluster1	164492	164592	MergePeak_23	0.447663	.	100	1	100	0	SK1G00039321,SK1G00039322	2.96449	4.47137	1.50688	0.0199515	0.0113852	0.73323	1.94366	0.13476
cluster1	179257	179707	MergePeak_25	0.167092	.	450	1	450	0	SK1G00039323	2.79227	4.05529	1.26302	0.0174744	0.029399	0.890636	1.53167	0.0502997
cluster1	289929	290004	MergePeak_48	0.767036	.	75	1	75	0	SK1G00039341	5.39348	3.32899	-2.06449	-0.0223653	0.00488846	0.587623	2.31083	0.230901
cluster1	606216	606391	MergePeak_88	0.167092	.	175	1	175	0	SK1G00039384	7.85571	6.68527	-1.17044	-0.0197548	0.0477896	0.890636	1.32067	0.0502997
cluster1	719674	719849	MergePeak_114	3.69529	.	175	1	175	0	SK1G00039400	2.10738	1.04478	-1.0626	-0.896475	0.000100796	0.0771982	3.99656	1.11239
cluster1	1266179	1266354	MergePeak_165	0.818454	.	175	1	175	0	SK1G00039471	2.90274	1.80706	-1.09568	-0.0399627	0.00407409	0.567049	2.38997	0.246379
cluster1	1434233	1434383	MergePeak_184	2.74288	.	150	1	150	0	SK1G00039494	2.48709	1.34147	-1.14563	-0.934959	0.000267498	0.149387	3.57268	0.825688
cluster1	1450084	1450159	MergePeak_189	0.273784	.	75	1	75	0	SK1G00039495	1.08956	2.12452	1.03496	0.026375	0.019292	0.827147	1.71462	0.0824171
cluster1	2481802	2481977	MergePeak_328	0.378291	.	175	1	175	0	SK1G00039618	7.2236	5.50717	-1.71643	-0.0223243	0.0138064	0.769349	1.85992	0.113877
cluster1	3076261	3076954	MergePeak_401	3.0908	.	693	1	693	0	SK1G00039691	3.19065	1.88914	-1.30151	-1.0781	0.000178099	0.117375	3.74934	0.930423
cluster1	4221690	4222114	MergePeak_548	14.9904	.	424	1	424	0	SK1G00039833	4.46484	3.08149	-1.38335	-1.29696	8.02239e-09	3.07212e-05	8.0957	4.51256
cluster1	4371099	4371149	MergePeak_564	0.568509	.	50	1	50	0	SK1G00039853	-0.14076	2.75331	2.89407	0.0110597	0.00799107	0.674313	2.0974	0.171138
cluster1	4815249	4815374	MergePeak_612	0.188011	.	125	1	125	0	SK1G00039908	1.04058	2.15172	1.11114	0.0214754	0.026764	0.877815	1.57245	0.056597
cluster1	6148959	6149234	MergePeak_780	0.801575	.	275	1	275	0	SK1G00040074	6.86166	5.24573	-1.61593	-0.0297297	0.00463699	0.573722	2.33376	0.241298
cluster1	6457657	6457732	MergePeak_805	0.197834	.	75	1	75	0	SK1G00040108	5.07176	3.57811	-1.49365	-0.0179038	0.0245085	0.871859	1.61068	0.0595539
cluster1	7148726	7148801	MergePeak_877	0.299915	.	75	1	75	0	SK1G00040184	4.93377	3.31372	-1.62005	-0.0193196	0.0173872	0.8123	1.75977	0.0902834
cluster1	7250928	7251003	MergePeak_892	0.167092	.	75	1	75	0	SK1G00040203	3.29174	2.25161	-1.04013	-0.0198922	0.0388599	0.890636	1.4105	0.0502997
cluster1	7578130	7578430	MergePeak_923	1.88789	.	300	1	300	0	SK1G00040245	2.63118	3.91504	1.28386	0.0464376	0.000826552	0.270202	3.08273	0.568312
cluster1	7859711	7859761	MergePeak_950	0.553831	.	50	1	50	0	SK1G00040279	2.80487	1.26443	-1.54044	-0.0220921	0.0083099	0.681209	2.0804	0.16672
cluster1	8190869	8195048	MergePeak_990	0.473443	.	4179	1	4179	0	SK1G00040322	6.43749	8.31559	1.8781	0.0152663	0.010586	0.720243	1.97527	0.142521
cluster1	9424104	9424254	MergePeak_1099	1.36129	.	150	1	150	0	SK1G00040457	3.91599	2.72282	-1.19317	-0.0466555	0.00159725	0.389235	2.79663	0.409788
cluster1	9429896	9430096	MergePeak_1102	0.167092	.	200	1	200	0	SK1G00040459	5.84463	4.66243	-1.1822	-0.0208988	0.0329252	0.890636	1.48247	0.0502997
cluster1	9541274	9541374	MergePeak_1113	0.299915	.	100	1	100	0	SK1G00040471	0.768184	1.79331	1.02512	0.0282573	0.0170293	0.8123	1.7688	0.0902834
cluster1	10810733	10810783	MergePeak_1252	0.167092	.	50	1	50	0	SK1G00040624	1.06138	2.49836	1.43698	0.0148725	0.0378439	0.890636	1.422	0.0502997
cluster1	11469412	11469934	MergePeak_1325	0.167092	.	522	1	522	0	SK1G00040714	2.40518	3.50844	1.10326	0.0203512	0.0307198	0.890636	1.51258	0.0502997
cluster1	12244929	12245415	MergePeak_1414	0.482474	.	486	1	486	0	SK1G00040813	2.83586	4.20641	1.37055	0.0240777	0.00929075	0.715749	2.03195	0.145239
cluster1	12549575	12549750	MergePeak_1440	1.87398	.	175	1	175	0	SK1G00040853	3.76995	2.189	-1.58095	-0.0378572	0.000844737	0.272819	3.07328	0.564125
cluster1	12579073	12579123	MergePeak_1445	0.167092	.	50	1	50	0	SK1G00040855	0.826839	2.2414	1.41456	0.0158765	0.030614	0.890636	1.51408	0.0502997
cluster1	13190611	13190686	MergePeak_1494	0.167092	.	75	1	75	0	SK1G00040926	5.0043	3.74347	-1.26083	-0.0186127	0.037789	0.890636	1.42263	0.0502997
cluster1	13211220	13211345	MergePeak_1499	1.00638	.	125	1	125	0	SK1G00040930	2.93737	1.93395	-1.00341	-0.668238	0.0029503	0.497793	2.53013	0.302951
cluster1	14031552	14031702	MergePeak_1605	0.398593	.	150	1	150	0	SK1G00041042	5.53923	4.04107	-1.49816	-0.0240285	0.0131649	0.758598	1.88058	0.119988
cluster1	14119866	14120495	MergePeak_1615	0.211276	.	629	1	629	0	SK1G00041054	2.49901	1.37734	-1.12166	-0.022561	0.0232777	0.863773	1.63306	0.0636005
cluster1	14155408	14155508	MergePeak_1624	0.167092	.	100	1	100	0	SK1G00041061	6.11695	4.45707	-1.65988	-0.0123589	0.0485078	0.890636	1.31419	0.0502997
cluster1	14634451	14635178	MergePeak_1665	0.295555	.	727	1	727	0	SK1G00041112	3.74715	2.25289	-1.49426	-0.0190982	0.0175681	0.814759	1.75528	0.088971
cluster1	15323986	15324086	MergePeak_1746	0.29404	.	100	1	100	0	SK1G00041183	1.49858	2.74085	1.24227	0.023323	0.0176951	0.815615	1.75215	0.0885148
cluster1	15326086	15326236	MergePeak_1748	0.226353	.	150	1	150	0	SK1G00041183	4.48624	2.95449	-1.53175	-0.0186259	0.0219538	0.854793	1.65849	0.0681391
cluster1	18853953	18854178	MergePeak_2055	15.0534	.	225	1	225	0	SK1G00041559	7.54403	5.15304	-2.39099	-2.23796	6.12227e-09	2.94077e-05	8.21309	4.53154
cluster1	19669314	19669724	MergePeak_2106	14.6789	.	410	1	410	0	SK1G00041635	2.51725	1.33214	-1.18511	-1.10907	1.13779e-08	3.81245e-05	7.94394	4.4188
cluster1	20149152	20149359	MergePeak_2148	0.818454	.	207	1	207	0	SK1G00041689	4.71579	2.88915	-1.82663	-0.0250136	0.00434691	0.567049	2.36182	0.246379
cluster1	20321817	20322067	MergePeak_2164	0.167092	.	250	1	250	0	SK1G00041711	3.93358	5.17153	1.23795	0.0158801	0.0408682	0.890636	1.38861	0.0502997
cluster1	20788742	20789072	MergePeak_2186	4.1233	.	330	1	330	0	SK1G00041756	2.48599	0.483601	-2.00239	-1.71308	5.61846e-05	0.0573804	4.25038	1.24124
cluster1	21229060	21229310	MergePeak_2214	0.299915	.	250	1	250	0	SK1G00041789	3.63608	8.14662	4.51054	4.74836e-05	0.0170234	0.8123	1.76895	0.0902834
cluster1	21400505	21400850	MergePeak_2233	0.188011	.	345	1	345	0	SK1G00041811	3.989	2.85009	-1.13891	-0.0211774	0.0268062	0.877815	1.57176	0.056597
cluster1	23041063	23041330	MergePeak_2321	0.167092	.	267	1	267	0	SK1G00041949	4.89545	3.88622	-1.00923	-0.0208928	0.0441001	0.890636	1.35556	0.0502997
cluster1	25472867	25473094	MergePeak_2426	0.378291	.	227	1	227	0	SK1G00042104	4.54759	3.09579	-1.45181	-0.0218277	0.0140346	0.769349	1.8528	0.113877
cluster1	25567666	25567766	MergePeak_2433	0.226353	.	100	1	100	0	SK1G00042114	4.44009	5.62332	1.18323	0.020875	0.0219993	0.854793	1.65759	0.0681391
cluster1	28857544	28857619	MergePeak_2585	0.473443	.	75	1	75	0	SK1G00042351	4.73562	6.82252	2.0869	0.0129722	0.00956965	0.720243	2.0191	0.142521
cluster1	32860869	32860919	MergePeak_2784	15.0534	.	50	1	50	0	SK1G00042654	1.78198	0.277706	-1.50427	-1.40923	6.58234e-09	2.94077e-05	8.18162	4.53154
cluster1	34006203	34006253	MergePeak_2861	0.167092	.	50	1	50	0	SK1G00042767	0.251851	1.45276	1.20091	0.0165883	0.0478899	0.890636	1.31976	0.0502997
cluster1	34311148	34311273	MergePeak_2901	0.167092	.	125	1	125	0	SK1G00042803	7.10457	5.33684	-1.76773	-0.0174992	0.0296567	0.890636	1.52788	0.0502997
cluster1	35519782	35519932	MergePeak_2990	0.287478	.	150	1	150	0	SK1G00042945	2.75555	1.66257	-1.09298	-0.0259856	0.0181244	0.819333	1.74174	0.0865395
cluster1	36884814	36884889	MergePeak_3135	0.167092	.	75	1	75	0	SK1G00043118	0.694473	1.70104	1.00657	0.0216659	0.0373083	0.890636	1.42819	0.0502997
cluster1	36966796	36966971	MergePeak_3148	0.167092	.	175	1	175	0	SK1G00043126	2.93433	1.80368	-1.13065	-0.0198337	0.0310877	0.890636	1.50741	0.0502997
cluster1	37843310	37843385	MergePeak_3187	0.450153	.	75	1	75	0	SK1G00043199	5.99512	3.84182	-2.1533	-0.0176619	0.0110942	0.731965	1.9549	0.135509
cluster1	39661761	39661936	MergePeak_3338	0.252052	.	175	1	175	0	SK1G00043405	4.92285	3.53543	-1.38742	-0.0201198	0.0202673	0.839701	1.6932	0.0758754
cluster1	39703429	39703729	MergePeak_3347	0.473443	.	300	1	300	0	SK1G00043414	2.41699	3.52172	1.10473	0.0296153	0.0106046	0.720243	1.97451	0.142521
cluster1	40431677	40431989	MergePeak_3434	0.167092	.	312	1	312	0	SK1G00043505	3.71158	4.75724	1.04566	0.0179983	0.0455499	0.890636	1.34151	0.0502997
cluster1	40488518	40488718	MergePeak_3438	0.167092	.	200	1	200	0	SK1G00043515	6.71066	5.51703	-1.19363	-0.0197443	0.0312333	0.890636	1.50538	0.0502997
cluster1	40983862	40984087	MergePeak_3488	0.167092	.	225	1	225	0	SK1G00043571	6.86124	9.94091	3.07967	0.00566305	0.0335941	0.890636	1.47374	0.0502997
cluster1	41319927	41320127	MergePeak_3517	0.450153	.	200	1	200	0	SK1G00043615	5.54247	3.22426	-2.3182	-0.0131713	0.0111645	0.731965	1.95216	0.135509
cluster1	42693347	42693671	MergePeak_3647	0.378291	.	324	1	324	0	SK1G00043767	5.63109	4.56167	-1.06942	-0.0286686	0.0140156	0.769349	1.85339	0.113877
cluster1	42865274	42865324	MergePeak_3672	0.667808	.	50	1	50	0	SK1G00043793	2.23193	1.0366	-1.19533	-0.031486	0.00662197	0.629463	2.17901	0.20103
cluster1	42921042	42921614	MergePeak_3679	0.167092	.	572	1	572	0	SK1G00043802	4.73559	3.22243	-1.51316	-0.016072	0.0354606	0.890636	1.45025	0.0502997
cluster1	43048815	43049290	MergePeak_3682	0.431831	.	475	1	475	0	SK1G00043816	7.56245	6.52038	-1.04207	-0.029901	0.0123618	0.74132	1.90792	0.129994
cluster10	24028	24078	MergePeak_3732	0.167092	.	50	1	50	0	SK1G00068531	0.61893	2.0569	1.43797	0.0147087	0.0385354	0.890636	1.41414	0.0502997
cluster10	142270	142320	MergePeak_3746	0.378291	.	50	1	50	0	SK1G00068548	3.00119	1.66143	-1.33976	-0.0224509	0.0139573	0.769349	1.8552	0.113877
cluster10	467234	467381	MergePeak_3781	0.167092	.	147	1	147	0	SK1G00068599,SK1G00068600	2.29396	1.00857	-1.28539	-0.0149294	0.0493181	0.890636	1.30699	0.0502997
cluster10	769713	769763	MergePeak_3822	0.188011	.	50	1	50	0	SK1G00068636	1.5039	3.23292	1.72902	0.0139162	0.0266018	0.877815	1.57509	0.056597
cluster10	882188	882313	MergePeak_3837	0.818454	.	125	1	125	0	SK1G00068647	4.36143	6.48072	2.11929	0.0162665	0.00435887	0.567049	2.36063	0.246379
cluster10	1099367	1099417	MergePeak_3857	0.226353	.	50	1	50	0	SK1G00068682	2.00667	0.855808	-1.15086	-0.0220353	0.0219778	0.854793	1.65802	0.0681391
cluster10	1127954	1128104	MergePeak_3861	0.473443	.	150	1	150	0	SK1G00068685	1.40612	2.56902	1.1629	0.0284395	0.01005	0.720243	1.99783	0.142521
cluster10	1689830	1690155	MergePeak_3903	1.13363	.	325	1	325	0	SK1G00068766	3.89404	2.73713	-1.15692	-0.0447241	0.00226991	0.455768	2.64399	0.341256
cluster10	5872137	5872212	MergePeak_4182	0.167092	.	75	1	75	0	SK1G00069193	2.95628	1.49232	-1.46395	-0.0157072	0.0292744	0.890636	1.53351	0.0502997
cluster10	6744908	6744958	MergePeak_4211	0.167092	.	50	1	50	0	SK1G00069253	2.85713	1.81411	-1.04302	-0.0189592	0.0449046	0.890636	1.34771	0.0502997
cluster10	12042391	12042552	MergePeak_4396	0.211276	.	161	1	161	0	SK1G00069562	2.86855	4.09372	1.22517	0.020061	0.0231049	0.863773	1.6363	0.0636005
cluster10	19245937	19246062	MergePeak_4611	0.197834	.	125	1	125	0	SK1G00070055	7.05817	5.06458	-1.99359	-0.0128019	0.0242739	0.871859	1.61486	0.0595539
cluster10	20456090	20456261	MergePeak_4682	0.197834	.	171	1	171	0	SK1G00070155	2.83706	1.24473	-1.59233	-0.0159093	0.0241269	0.871859	1.6175	0.0595539
cluster10	21020571	21020721	MergePeak_4703	0.167092	.	150	1	150	0	SK1G00070195	3.09312	1.76654	-1.32658	-0.0167682	0.029336	0.890636	1.5326	0.0502997
cluster10	24166748	24167053	MergePeak_4936	4.38583	.	305	1	305	0	SK1G00070510	2.31699	1.17906	-1.13793	-0.98295	4.1042e-05	0.0478335	4.38677	1.32027
cluster10	24976168	24976318	MergePeak_5004	0.167092	.	150	1	150	0	SK1G00070600	6.02398	4.43948	-1.5845	-0.0162323	0.0337621	0.890636	1.47157	0.0502997
cluster10	25423741	25424879	MergePeak_5042	1.94477	.	1138	1	1138	0	SK1G00070651	6.43149	4.28683	-2.14467	-0.0363223	0.000707385	0.259756	3.15034	0.585435
cluster10	25546695	25546831	MergePeak_5044	0.193134	.	136	1	136	0	SK1G00070670	5.02225	3.99761	-1.02464	-0.0248311	0.0250459	0.874703	1.60126	0.0581393
cluster11	444730	444780	MergePeak_5132	0.167092	.	50	1	50	0	SK1G00070777	4.206	2.89224	-1.31376	-0.0175472	0.0334458	0.890636	1.47566	0.0502997
cluster11	622969	623069	MergePeak_5179	0.167092	.	100	1	100	0	SK1G00070805	3.18192	2.06563	-1.11629	-0.0199353	0.031391	0.890636	1.50319	0.0502997
cluster11	1498966	1499141	MergePeak_5223	0.167092	.	175	1	175	0	SK1G00070866	5.58758	4.23102	-1.35656	-0.016154	0.0357914	0.890636	1.44622	0.0502997
cluster11	2180868	2180918	MergePeak_5304	0.167092	.	50	1	50	0	SK1G00070965	3.6186	2.45003	-1.16857	-0.0168186	0.0451936	0.890636	1.34492	0.0502997
cluster11	2725456	2725506	MergePeak_5366	0.188011	.	50	1	50	0	SK1G00071028	5.62544	3.7464	-1.87904	-0.014684	0.02672	0.877815	1.57316	0.056597
cluster11	3588427	3588502	MergePeak_5453	0.473443	.	75	1	75	0	SK1G00071132	0.349782	1.54021	1.19043	0.0283685	0.00965216	0.720243	2.01538	0.142521
cluster11	5213731	5213781	MergePeak_5623	0.167092	.	50	1	50	0	SK1G00071341	1.98738	0.976891	-1.01049	-0.0225158	0.0318503	0.890636	1.49689	0.0502997
cluster11	6374112	6374262	MergePeak_5703	0.758927	.	150	1	150	0	SK1G00071441	3.40218	2.39177	-1.0104	-0.0416635	0.0049601	0.590936	2.30451	0.22846
cluster11	6525267	6526264	MergePeak_5714	0.167092	.	997	1	997	0	SK1G00071453	1.24912	0.122879	-1.12624	-0.0200817	0.0312145	0.890636	1.50564	0.0502997
cluster11	6553547	6553685	MergePeak_5721	0.831446	.	138	1	138	0	SK1G00071459	5.4459	3.87205	-1.57385	-0.0285952	0.00397069	0.561966	2.40113	0.25029
cluster11	10514932	10514982	MergePeak_5944	0.167092	.	50	1	50	0	SK1G00071842	1.60171	2.79582	1.19411	0.0165999	0.0444938	0.890636	1.3517	0.0502997
cluster11	10933760	10933935	MergePeak_5970	0.420926	.	175	1	175	0	SK1G00071884,SK1G00071885	3.18563	1.97299	-1.21264	-0.0256574	0.012668	0.746945	1.89729	0.126711
cluster11	11377305	11377455	MergePeak_5977	0.167092	.	150	1	150	0	SK1G00071901	7.46247	5.37536	-2.08712	-0.0104908	0.0327951	0.890636	1.48419	0.0502997
cluster11	12940341	12940541	MergePeak_6025	3.35052	.	200	1	200	0	SK1G00072014	3.41052	1.40009	-2.01043	-1.67478	0.000142525	0.0980379	3.84611	1.00861
cluster11	13242408	13242583	MergePeak_6040	0.167092	.	175	1	175	0	SK1G00072039	2.24847	3.34763	1.09916	0.0195298	0.0358461	0.890636	1.44556	0.0502997
cluster11	13749559	13749684	MergePeak_6047	0.167092	.	125	1	125	0	SK1G00072075	5.26235	6.67366	1.41131	0.0137969	0.0373107	0.890636	1.42817	0.0502997
cluster11	15305084	15305134	MergePeak_6083	0.473443	.	50	1	50	0	SK1G00072154	-0.868136	1.59213	2.46027	0.0137942	0.00990099	0.720243	2.00432	0.142521
cluster11	20612896	20613071	MergePeak_6221	1.10556	.	175	1	175	0	SK1G00072463	2.20255	1.08544	-1.11711	-0.771429	0.00247735	0.464723	2.60601	0.332805
cluster11	22061503	22061578	MergePeak_6259	0.818454	.	75	1	75	0	SK1G00072561	0.158323	1.76849	1.61017	0.0265731	0.00416754	0.567049	2.38012	0.246379
cluster12	5796519	5796694	MergePeak_6558	0.167092	.	175	1	175	0	SK1G00073143	3.80277	2.77062	-1.03214	-0.0193474	0.0427636	0.890636	1.36893	0.0502997
cluster12	6680759	6680834	MergePeak_6576	0.167092	.	75	1	75	0	SK1G00073190	3.14572	1.78397	-1.36175	-0.0157759	0.0363402	0.890636	1.43961	0.0502997
cluster12	8418515	8418640	MergePeak_6623	0.190294	.	125	1	125	0	SK1G00073304	5.48419	4.10743	-1.37676	-0.0195193	0.0260474	0.876427	1.58424	0.0572842
cluster12	10263568	10263643	MergePeak_6673	1.10556	.	75	1	75	0	SK1G00037182,SK1G00073423	0.83727	3.43955	2.60228	1.77453	0.00246933	0.464723	2.60742	0.332805
cluster12	12404113	12404238	MergePeak_6777	3.5441	.	125	1	125	0	SK1G00073600	0.975537	3.27625	2.30071	1.93191	0.000115131	0.0857276	3.93881	1.06688
cluster12	13183503	13183703	MergePeak_6815	0.741183	.	200	1	200	0	SK1G00073672	4.74076	3.69091	-1.04985	-0.0387904	0.00574807	0.598249	2.24048	0.223118
cluster12	14775631	14775756	MergePeak_6895	0.319465	.	125	1	125	0	SK1G00073785	3.29976	1.9828	-1.31697	-0.0217942	0.016241	0.801367	1.78939	0.0961684
cluster12	14843617	14844139	MergePeak_6905	0.482474	.	522	1	522	0	SK1G00073795	4.45228	3.02574	-1.42654	-0.0236707	0.0093165	0.715749	2.03075	0.145239
cluster12	14995888	14996038	MergePeak_6916	0.232879	.	150	1	150	0	SK1G00073811	2.03993	3.17586	1.13592	0.0226525	0.0210781	0.850935	1.67617	0.0701037
cluster12	15305988	15306313	MergePeak_6928	0.379777	.	325	1	325	0	SK1G00073836	5.424	4.40058	-1.02342	-0.0307972	0.0135614	0.768557	1.8677	0.114324
cluster12	15552023	15552098	MergePeak_6947	0.167092	.	75	1	75	0	SK1G00073867	4.82657	3.79405	-1.03252	-0.0193231	0.0495534	0.890636	1.30493	0.0502997
cluster12	15890580	15890705	MergePeak_6967	0.433218	.	125	1	125	0	SK1G00073910	4.30016	2.14478	-2.15537	-0.0174967	0.011855	0.740608	1.9261	0.130412
cluster12	16618681	16618731	MergePeak_7028	0.300554	.	50	1	50	0	SK1G00073981	3.88559	2.82922	-1.05637	-0.0289413	0.0168107	0.811941	1.77441	0.0904757
cluster12	16803053	16803103	MergePeak_7047	0.167092	.	50	1	50	0	SK1G00073998	4.13538	2.12734	-2.00804	-0.0129824	0.0291525	0.890636	1.53532	0.0502997
cluster12	17202746	17202796	MergePeak_7070	3.5352	.	50	1	50	0	SK1G00074034	2.64838	1.02935	-1.61903	-1.35974	0.000119061	0.0862579	3.92423	1.0642
cluster12	18294322	18294497	MergePeak_7188	0.420926	.	175	1	175	0	SK1G00074172	1.47987	2.76645	1.28658	0.0235836	0.012564	0.746945	1.90087	0.126711
cluster12	18768832	18768882	MergePeak_7210	0.167092	.	50	1	50	0	SK1G00074223	2.09445	0.992135	-1.10231	-0.0167434	0.0494831	0.890636	1.30554	0.0502997
cluster12	18806763	18807013	MergePeak_7211	0.945279	.	250	1	250	0	SK1G00074225	4.84936	3.6177	-1.23166	-0.0345434	0.00321602	0.519329	2.49268	0.284557
cluster12	19027469	19027619	MergePeak_7238	0.818454	.	150	1	150	0	SK1G00074248	5.53414	4.07792	-1.45622	-0.0337984	0.00424487	0.567049	2.37214	0.246379
cluster12	19291074	19291174	MergePeak_7272	0.741183	.	100	1	100	0	SK1G00074285	3.28287	2.01186	-1.27101	-0.0296306	0.00600966	0.598249	2.22115	0.223118
cluster12	19367457	19368192	MergePeak_7283	0.167092	.	735	1	735	0	SK1G00074297	4.29782	2.78338	-1.51444	-0.0165004	0.0303398	0.890636	1.51799	0.0502997
cluster12	19614819	19615069	MergePeak_7319	2.14477	.	250	1	250	0	SK1G00074331	3.30136	1.91769	-1.38367	-1.0988	0.000497332	0.226131	3.30335	0.64564
cluster12	20982481	20982531	MergePeak_7383	0.226353	.	50	1	50	0	SK1G00074404	3.08564	1.64681	-1.43883	-0.0180533	0.0220541	0.854793	1.65651	0.0681391
cluster12	20993394	20993544	MergePeak_7385	1.4942	.	150	1	150	0	SK1G00074407	3.16041	1.88958	-1.27083	-0.0458529	0.00132191	0.354978	2.8788	0.449799
cluster12	22030766	22030816	MergePeak_7530	0.381586	.	50	1	50	0	SK1G00074540	2.23416	1.09225	-1.14191	-0.0259689	0.0134952	0.767593	1.86982	0.114869
cluster12	23025788	23025838	MergePeak_7653	0.167092	.	50	1	50	0	SK1G00074678	4.36944	2.81374	-1.5557	-0.0146353	0.0398338	0.890636	1.39975	0.0502997
cluster12	23053210	23053410	MergePeak_7655	0.346783	.	200	1	200	0	SK1G00074685	5.20326	4.06757	-1.13569	-0.0264172	0.0151072	0.786335	1.82082	0.104392
cluster12	23344802	23345346	MergePeak_7668	2.06731	.	544	1	544	0	SK1G00074716	1.35668	2.64771	1.29103	1.01882	0.00064088	0.238603	3.19322	0.622323
cluster12	23634128	23634203	MergePeak_7709	0.473443	.	75	1	75	0	SK1G00074753	3.80666	2.36347	-1.44318	-0.0233933	0.010659	0.720243	1.97228	0.142521
cluster2	1333352	1333749	MergePeak_7887	0.193134	.	397	1	397	0	SK1G00043985	4.75953	5.89289	1.13336	0.0198804	0.0252248	0.874703	1.59817	0.0581393
cluster2	1931648	1931723	MergePeak_7992	0.419098	.	75	1	75	0	SK1G00044081	3.42208	1.92575	-1.49632	-0.0212917	0.0127544	0.747892	1.89434	0.126161
cluster2	2088058	2088183	MergePeak_8022	0.167092	.	125	1	125	0	SK1G00044106	7.07503	5.35361	-1.72142	-0.0129185	0.0440939	0.890636	1.35562	0.0502997
cluster2	2730434	2730609	MergePeak_8104	0.187805	.	175	1	175	0	SK1G00044199	2.33055	3.3973	1.06675	0.0217905	0.0273381	0.87794	1.56323	0.0565349
cluster2	3104982	3105157	MergePeak_8163	0.226353	.	175	1	175	0	SK1G00044252	4.34141	5.46942	1.12802	0.0219918	0.021977	0.854793	1.65803	0.0681391
cluster2	3959082	3959207	MergePeak_8293	0.171265	.	125	1	125	0	SK1G00044372	5.92681	4.77696	-1.14985	-0.0234539	0.0286285	0.888064	1.5432	0.051556
cluster2	4049718	4049876	MergePeak_8305	4.1233	.	158	1	158	0	SK1G00044389	1.82077	0.39824	-1.42253	-1.21756	5.77956e-05	0.0573804	4.23811	1.24124
cluster2	4344516	4344566	MergePeak_8338	0.743403	.	50	1	50	0	SK1G00044427	-1.13276	1.05204	2.1848	0.0209469	0.00512518	0.597329	2.29029	0.223787
cluster2	4624752	4624877	MergePeak_8383	0.473443	.	125	1	125	0	SK1G00044461	3.36051	2.24835	-1.11216	-0.0294278	0.0106669	0.720243	1.97196	0.142521
cluster2	4770034	4770109	MergePeak_8400	0.167092	.	75	1	75	0	SK1G00044479	1.61889	3.05706	1.43817	0.0138527	0.0431986	0.890636	1.36453	0.0502997
cluster2	5139229	5139404	MergePeak_8466	0.356665	.	175	1	175	0	SK1G00044530	2.54216	3.67215	1.12999	0.0256484	0.0148761	0.780968	1.82751	0.107367
cluster2	5174697	5174935	MergePeak_8475	0.190294	.	238	1	238	0	SK1G00044535	5.23541	4.12428	-1.11113	-0.0223376	0.0260475	0.876427	1.58423	0.0572842
cluster2	5638589	5638739	MergePeak_8542	1.24069	.	150	1	150	0	SK1G00044591	3.77853	2.48151	-1.29702	-0.0420493	0.00187858	0.42317	2.72617	0.373485
cluster2	6498504	6498554	MergePeak_8625	0.167092	.	50	1	50	0	SK1G00044690	1.15538	2.23466	1.07928	0.0198783	0.038107	0.890636	1.419	0.0502997
cluster2	6628637	6628737	MergePeak_8635	41.3801	.	100	1	100	0	SK1G00044703	3.13584	1.05528	-2.08055	-2.02243	1.3035e-17	3.49417e-13	16.8849	12.4567
cluster2	8062348	8062932	MergePeak_8796	2.14477	.	584	1	584	0	SK1G00044870	2.2665	0.877644	-1.38886	-1.0964	0.000559422	0.226131	3.25226	0.64564
cluster2	9408794	9408994	MergePeak_8946	2.13393	.	200	1	200	0	SK1G00045024	4.14935	2.35143	-1.79792	-0.0354626	0.000577965	0.227837	3.2381	0.642376
cluster2	11160498	11160648	MergePeak_9086	2.14477	.	150	1	150	0	SK1G00045212	4.76322	2.99118	-1.77204	-0.0346339	0.000564796	0.226131	3.24811	0.64564
cluster2	11693897	11694022	MergePeak_9118	0.57149	.	125	1	125	0	SK1G00045261	4.46584	3.32647	-1.13937	-0.0316634	0.00778273	0.672921	2.10887	0.172036
cluster2	12635848	12635973	MergePeak_9169	0.306776	.	125	1	125	0	SK1G00045351	0.897415	2.1194	1.22198	0.0235264	0.0167082	0.808446	1.77707	0.0923488
cluster2	13897279	13898152	MergePeak_9234	2.09618	.	873	1	873	0	SK1G00045460	2.36085	3.36527	1.00441	0.789633	0.000612646	0.233877	3.21279	0.631012
cluster2	15825728	15825778	MergePeak_9316	0.484547	.	50	1	50	0	SK1G00045610	0.851599	2.27498	1.42338	0.0242921	0.00922186	0.714722	2.03518	0.145863
cluster2	17150792	17150867	MergePeak_9391	0.326647	.	75	1	75	0	SK1G00045713	4.89754	2.64858	-2.24897	-0.0133739	0.0158549	0.797388	1.79984	0.0983305
cluster2	20291635	20291850	MergePeak_9487	0.188011	.	215	1	215	0	SK1G00045867	5.57016	2.80045	-2.7697	-0.0087875	0.0269064	0.877815	1.57014	0.056597
cluster2	21729975	21730025	MergePeak_9585	0.167092	.	50	1	50	0	SK1G00045982	5.2921	3.494	-1.7981	-0.0138689	0.0396063	0.890636	1.40224	0.0502997
cluster2	23583096	23583571	MergePeak_9708	16.9039	.	475	1	475	0	SK1G00046151	3.18687	2.00852	-1.17835	-1.11392	9.12644e-10	8.15477e-06	9.0397	5.08859
cluster2	24007023	24007098	MergePeak_9737	0.167092	.	75	1	75	0	SK1G00046195	-0.0273407	1.59078	1.61813	0.0133645	0.044433	0.890636	1.35229	0.0502997
cluster2	24347627	24347827	MergePeak_9754	0.299915	.	200	1	200	0	SK1G00046228	5.29799	4.18566	-1.11233	-0.0281975	0.0173195	0.8123	1.76146	0.0902834
cluster2	26381033	26381233	MergePeak_9910	1.26987	.	200	1	200	0	SK1G00046414,SK1G00046415	2.50374	1.1743	-1.32944	-0.953416	0.00178667	0.414697	2.74796	0.382269
cluster2	27107122	27107247	MergePeak_9982	0.167092	.	125	1	125	0	SK1G00046492	4.46551	3.30948	-1.15603	-0.0187298	0.0415453	0.890636	1.38148	0.0502997
cluster2	27107697	27107797	MergePeak_9983	0.855055	.	100	1	100	0	SK1G00046492	3.73724	1.8484	-1.88884	-0.0226895	0.0037948	0.552844	2.42081	0.257397
cluster2	27353464	27354277	MergePeak_10014	0.167092	.	813	1	813	0	SK1G00046517	4.515	3.37394	-1.14106	-0.0173956	0.0475791	0.890636	1.32258	0.0502997
cluster2	27674066	27674116	MergePeak_10046	0.187805	.	50	1	50	0	SK1G00046558	4.04689	2.3787	-1.66819	-0.0151253	0.0274651	0.87794	1.56122	0.0565349
cluster2	28586879	28586929	MergePeak_10136	0.167092	.	50	1	50	0	SK1G00046669	2.00403	3.26146	1.25742	0.0174108	0.0347323	0.890636	1.45927	0.0502997
cluster2	28859502	28864350	MergePeak_10179	1.61027	.	4848	1	4848	0	SK1G00046704	1.07306	2.17331	1.10024	0.0565142	0.00111191	0.327536	2.95393	0.484741
cluster2	28986293	28986393	MergePeak_10196	0.447663	.	100	1	100	0	SK1G00046719	3.45665	2.32563	-1.13102	-0.0290903	0.011461	0.73323	1.94078	0.13476
cluster2	29316304	29316429	MergePeak_10248	0.956381	.	125	1	125	0	SK1G00046758	4.02707	2.39968	-1.62739	-0.0279	0.00314674	0.515348	2.50214	0.287899
cluster2	29839006	29839156	MergePeak_10340	0.167092	.	150	1	150	0	SK1G00046837	4.73607	3.46985	-1.26623	-0.0194889	0.0298918	0.890636	1.52445	0.0502997
cluster2	29841799	29841974	MergePeak_10342	1.00638	.	175	1	175	0	SK1G00046837	2.24749	1.22755	-1.01994	-0.680411	0.0029441	0.497793	2.53105	0.302951
cluster2	30467365	30467665	MergePeak_10417	1.26987	.	300	1	300	0	SK1G00046904	5.76311	4.45721	-1.3059	-0.0449661	0.00176397	0.414697	2.75351	0.382269
cluster2	32633514	32633689	MergePeak_10633	1.13363	.	175	1	175	0	SK1G00047149	4.0385	3.0205	-1.018	-0.0514794	0.00226767	0.455768	2.64442	0.341256
cluster2	33121120	33121295	MergePeak_10696	1.26987	.	175	1	175	0	SK1G00047208	2.30044	1.2477	-1.05274	-0.758132	0.00175197	0.414697	2.75647	0.382269
cluster2	33992201	33992301	MergePeak_10794	0.278422	.	100	1	100	0	SK1G00047310	4.15071	2.71187	-1.43885	-0.019877	0.0187824	0.824493	1.72625	0.0838133
cluster2	34452561	34452636	MergePeak_10852	0.167092	.	75	1	75	0	SK1G00047370	2.15665	3.16704	1.01039	0.0185551	0.0492957	0.890636	1.30719	0.0502997
cluster2	34664520	34664820	MergePeak_10870	0.167092	.	300	1	300	0	SK1G00047401	5.47242	4.43589	-1.03653	-0.0205965	0.0378381	0.890636	1.42207	0.0502997
cluster2	34701335	34701385	MergePeak_10878	0.497913	.	50	1	50	0	SK1G00047408	4.74027	2.46301	-2.27726	-0.0157391	0.00898173	0.70813	2.04664	0.149887
cluster2	34766085	34766185	MergePeak_10882	2.59181	.	100	1	100	0	SK1G00047416	4.183	1.9911	-2.19189	-0.0330027	0.000303216	0.165878	3.51825	0.780212
cluster2	35252043	35252343	MergePeak_10949	1.77535	.	300	1	300	0	SK1G00047488	11.6528	8.89345	-2.75932	-2.0981	0.000926304	0.292124	3.03325	0.534433
cluster2	35394845	35394970	MergePeak_10969	0.278422	.	125	1	125	0	SK1G00047504	3.77475	2.67208	-1.10267	-0.0260235	0.0186496	0.824493	1.72933	0.0838133
cluster2	36301557	36301657	MergePeak_11083	0.167092	.	100	1	100	0	SK1G00047622	4.06983	3.04827	-1.02156	-0.0204076	0.0427465	0.890636	1.3691	0.0502997
cluster2	36513337	36513412	MergePeak_11109	0.167092	.	75	1	75	0	SK1G00047663	5.98414	7.50655	1.52242	0.0115696	0.0356244	0.890636	1.44825	0.0502997
cluster2	36728373	36728548	MergePeak_11147	8.6069	.	175	1	175	0	SK1G00047695	2.46427	1.36905	-1.09522	-0.994326	1.05251e-06	0.00256487	5.97777	2.59093
cluster2	38481362	38481662	MergePeak_11391	0.741183	.	300	1	300	0	SK1G00047921	4.22945	3.1818	-1.04765	-0.0372532	0.00615969	0.598249	2.21044	0.223118
cluster2	39295929	39296288	MergePeak_11505	0.167092	.	359	1	359	0	SK1G00048030	1.6145	3.0072	1.3927	0.0156825	0.0371162	0.890636	1.43044	0.0502997
cluster3	462156	462356	MergePeak_11600	0.747109	.	200	1	200	0	SK1G00048107	4.72081	5.80279	1.08198	0.0357028	0.00506957	0.595796	2.29503	0.224902
cluster3	467406	468622	MergePeak_11603	0.167092	.	1216	1	1216	0	SK1G00048108	0.663339	2.31526	1.65192	0.0143006	0.0322477	0.890636	1.4915	0.0502997
cluster3	745442	745619	MergePeak_11664	4.36619	.	177	1	177	0	SK1G00048148	0.575361	2.02967	1.45431	1.25725	4.34135e-05	0.0484892	4.36238	1.31435
cluster3	895074	895299	MergePeak_11693	1.14332	.	225	1	225	0	SK1G00048166	6.05019	4.95866	-1.09153	-0.0494763	0.00217863	0.452715	2.66182	0.344175
cluster3	1316655	1316755	MergePeak_11735	0.473443	.	100	1	100	0	SK1G00048219	3.1564	1.55219	-1.60421	-0.020243	0.00963385	0.720243	2.0162	0.142521
cluster3	1495755	1495805	MergePeak_11762	0.187863	.	50	1	50	0	SK1G00048242	4.18005	2.54016	-1.6399	-0.0147757	0.027046	0.877905	1.5679	0.0565524
cluster3	3870641	3870766	MergePeak_12026	0.273769	.	125	1	125	0	SK1G00048534	5.41929	4.06882	-1.35046	-0.0220066	0.0194708	0.827156	1.71062	0.0824127
cluster3	3886640	3886690	MergePeak_12031	0.187805	.	50	1	50	0	SK1G00048537	0.768853	1.9785	1.20965	0.0197439	0.0275608	0.87794	1.55971	0.0565349
cluster3	4119374	4119517	MergePeak_12073	1.31259	.	143	1	143	0	SK1G00048565	3.79427	2.46378	-1.33049	-0.040695	0.00168212	0.402597	2.77414	0.39513
cluster3	4725419	4725494	MergePeak_12156	0.167092	.	75	1	75	0	SK1G00048643	4.04252	2.88593	-1.15659	-0.0185953	0.0388413	0.890636	1.41071	0.0502997
cluster3	4770141	4770537	MergePeak_12158	0.190294	.	396	1	396	0	SK1G00048649	1.35262	2.43677	1.08414	0.0224908	0.0261561	0.876427	1.58243	0.0572842
cluster3	5733499	5733674	MergePeak_12285	0.197834	.	175	1	175	0	SK1G00048781	5.16459	3.94731	-1.21729	-0.0215928	0.0237483	0.871859	1.62437	0.0595539
cluster3	6342514	6342614	MergePeak_12366	0.278422	.	100	1	100	0	SK1G00048863	1.79115	3.1575	1.36635	0.0193882	0.0187503	0.824493	1.72699	0.0838133
cluster3	6372458	6372533	MergePeak_12371	0.556287	.	75	1	75	0	SK1G00048865	2.13728	1.12736	-1.00991	-0.0352634	0.0082399	0.68005	2.08408	0.167459
cluster3	7335225	7335400	MergePeak_12484	0.57149	.	175	1	175	0	SK1G00048972	3.67814	2.6712	-1.00694	-0.0381467	0.00771782	0.672921	2.11251	0.172036
cluster3	7387795	7388183	MergePeak_12495	2.19253	.	388	1	388	0	SK1G00048977	2.61124	3.96583	1.35459	1.08324	0.000438614	0.218767	3.35792	0.660018
cluster3	9209273	9209398	MergePeak_12656	0.250223	.	125	1	125	0	SK1G00049177	1.22044	3.13441	1.91397	0.0142032	0.0204003	0.840766	1.69036	0.0753247
cluster3	9580638	9580911	MergePeak_12682	0.378291	.	273	1	273	0	SK1G00049227	1.62215	2.77641	1.15426	0.0263382	0.0139929	0.769349	1.85409	0.113877
cluster3	13234493	13234593	MergePeak_12985	0.273784	.	100	1	100	0	SK1G00049557	3.52113	2.30215	-1.21898	-0.0225866	0.0193832	0.827147	1.71257	0.0824171
cluster3	14681382	14684035	MergePeak_13138	0.167092	.	2653	1	2653	0	SK1G00049738	1.80251	3.05352	1.25102	0.0151197	0.0466294	0.890636	1.33134	0.0502997
cluster3	15108506	15108556	MergePeak_13165	0.197834	.	50	1	50	0	SK1G00049775	4.32825	2.52339	-1.80486	-0.0138343	0.0244934	0.871859	1.61095	0.0595539
cluster3	15476840	15476940	MergePeak_13201	0.167092	.	100	1	100	0	SK1G00049820	3.06857	4.31605	1.24748	0.0169254	0.0340699	0.890636	1.46763	0.0502997
cluster3	15534671	15534721	MergePeak_13213	0.741183	.	50	1	50	0	SK1G00049827	1.84329	0.817255	-1.02603	-0.0394352	0.0053881	0.598249	2.26856	0.223118
cluster3	16305898	16307399	MergePeak_13284	1.54609	.	1501	1	1501	0	SK1G00049895	4.70101	3.64082	-1.0602	-0.0621866	0.00118804	0.342436	2.92517	0.46542
cluster3	17534706	17534836	MergePeak_13361	0.167092	.	130	1	130	0	SK1G00050005	1.94783	3.05846	1.11063	0.0178229	0.0430841	0.890636	1.36568	0.0502997
cluster3	17901337	17901387	MergePeak_13401	0.167092	.	50	1	50	0	SK1G00050036	2.02229	0.743826	-1.27846	-0.0143268	0.047863	0.890636	1.32	0.0502997
cluster3	21771159	21771209	MergePeak_13551	0.801575	.	50	1	50	0	SK1G00050301	2.03092	1.00983	-1.02109	-0.601914	0.00454089	0.573722	2.34286	0.241298
cluster3	24641685	24641835	MergePeak_13624	0.187805	.	150	1	150	0	SK1G00050463	4.20574	3.18216	-1.02359	-0.0240715	0.0275826	0.87794	1.55936	0.0565349
cluster3	24768915	24768990	MergePeak_13634	0.167092	.	75	1	75	0	SK1G00050469	4.50192	3.11549	-1.38643	-0.013925	0.0457065	0.890636	1.34002	0.0502997
cluster3	25293129	25293179	MergePeak_13668	0.188011	.	50	1	50	0	SK1G00050500	3.00265	4.45695	1.45429	0.0160647	0.0264792	0.877815	1.57709	0.056597
cluster3	25332269	25332369	MergePeak_13669	0.482474	.	100	1	100	0	SK1G00050505	6.4664	3.88425	-2.58215	-0.0139198	0.00931868	0.715749	2.03065	0.145239
cluster3	27020371	27020521	MergePeak_13760	0.629504	.	150	1	150	0	SK1G00050633	5.5597	4.34332	-1.21639	-0.0336539	0.00704128	0.646399	2.15235	0.189499
cluster3	27579657	27579882	MergePeak_13786	0.167092	.	225	1	225	0	SK1G00050679	12.3843	10.6561	-1.72817	-0.0114781	0.0450954	0.890636	1.34587	0.0502997
cluster3	27619401	27619760	MergePeak_13790	0.229836	.	359	1	359	0	SK1G00050681	3.45885	2.36023	-1.09862	-0.02412	0.0211863	0.852732	1.67395	0.0691875
cluster3	29836945	29837045	MergePeak_13918	0.190294	.	100	1	100	0	SK1G00050859	2.35988	3.40982	1.04995	0.0231946	0.0260909	0.876427	1.58351	0.0572842
cluster3	30060371	30060471	MergePeak_13940	0.167092	.	100	1	100	0	SK1G00050882	3.96897	2.71893	-1.25004	-0.0184843	0.0334875	0.890636	1.47512	0.0502997
cluster3	30504210	30504310	MergePeak_13979	0.167092	.	100	1	100	0	SK1G00050928	2.06139	3.07533	1.01394	0.020171	0.0429839	0.890636	1.36669	0.0502997
cluster3	31479459	31479509	MergePeak_14060	0.167092	.	50	1	50	0	SK1G00051026	7.00258	4.70555	-2.29703	-0.00908235	0.0302945	0.890636	1.51864	0.0502997
cluster3	33168850	33168950	MergePeak_14204	0.307449	.	100	1	100	0	SK1G00051206	0.0734573	2.15831	2.08485	0.0140109	0.0166677	0.808069	1.77812	0.0925513
cluster3	33200807	33200982	MergePeak_14210	1.47093	.	175	1	175	0	SK1G00051211	2.95854	4.11029	1.15175	0.851041	0.00138616	0.360751	2.85819	0.442793
cluster3	34136615	34136790	MergePeak_14319	0.247973	.	175	1	175	0	SK1G00051309	5.49116	6.87156	1.3804	0.017953	0.0205446	0.842078	1.6873	0.0746475
cluster3	34291791	34292013	MergePeak_14344	0.239427	.	222	1	222	0	SK1G00051324	4.68901	3.6776	-1.01141	-0.0270329	0.0207648	0.847082	1.68267	0.0720748
cluster3	34524447	34524497	MergePeak_14373	0.275596	.	50	1	50	0	SK1G00051352	2.55681	1.48797	-1.06885	-0.0254559	0.0190285	0.826109	1.7206	0.0829627
cluster3	34640358	34640433	MergePeak_14378	0.831446	.	75	1	75	0	SK1G00051360	1.11757	2.70524	1.58766	0.982096	0.00397495	0.561966	2.40067	0.25029
cluster3	35322977	35323152	MergePeak_14465	0.275596	.	175	1	175	0	SK1G00051449	2.52255	1.48768	-1.03487	-0.0265136	0.0189374	0.826109	1.72268	0.0829627
cluster3	36895626	36895701	MergePeak_14651	0.473443	.	75	1	75	0	SK1G00051645	7.83166	5.48555	-2.34611	-0.0131894	0.0106327	0.720243	1.97336	0.142521
cluster3	36898416	36898566	MergePeak_14652	0.741183	.	150	1	150	0	SK1G00051645	5.26021	3.86482	-1.39539	-0.0301198	0.00598157	0.598249	2.22319	0.223118
cluster3	36930169	36930333	MergePeak_14661	4.11308	.	164	1	164	0	SK1G00051650	0.441502	1.91484	1.47334	0.0777071	6.68297e-05	0.0577883	4.17503	1.23816
cluster3	37193694	37193844	MergePeak_14699	0.252163	.	150	1	150	0	SK1G00051693	7.08882	5.99244	-1.09638	-0.0247144	0.0201767	0.839637	1.69515	0.0759085
cluster3	37201079	37201229	MergePeak_14701	0.190294	.	150	1	150	0	SK1G00051694	2.79793	3.92044	1.12251	0.0208239	0.0261373	0.876427	1.58274	0.0572842
cluster3	37558988	37559138	MergePeak_14755	0.167092	.	150	1	150	0	SK1G00051737	3.77561	4.81267	1.03706	0.0184687	0.0422012	0.890636	1.37467	0.0502997
cluster3	37658489	37658614	MergePeak_14772	1.00638	.	125	1	125	0	SK1G00051749	2.49263	1.48635	-1.00629	-0.671248	0.00287429	0.497793	2.54147	0.302951
cluster3	38142686	38142923	MergePeak_14844	0.473443	.	237	1	237	0	SK1G00051824	5.07313	4.03389	-1.03924	-0.032867	0.0101338	0.720243	1.99423	0.142521
cluster4	5840809	5840884	MergePeak_15068	0.801575	.	75	1	75	0	SK1G00052270	5.95361	3.8225	-2.13111	-0.0262565	0.00459358	0.573722	2.33785	0.241298
cluster4	7364781	7364831	MergePeak_15109	0.167092	.	50	1	50	0	SK1G00052379	1.066	2.30025	1.23425	0.0162038	0.0459082	0.890636	1.33811	0.0502997
cluster4	7466433	7466558	MergePeak_15110	0.176615	.	125	1	125	0	SK1G00052385	8.08292	6.19324	-1.88969	-0.0158674	0.0282537	0.884777	1.54892	0.0531664
cluster4	7724479	7724704	MergePeak_15118	0.473443	.	225	1	225	0	SK1G00052396	3.11951	2.11936	-1.00015	-0.0332715	0.010535	0.720243	1.97736	0.142521
cluster4	8993265	8993390	MergePeak_15157	0.167092	.	125	1	125	0	SK1G00052450	3.64342	2.47207	-1.17135	-0.0185079	0.033937	0.890636	1.46933	0.0502997
cluster4	14722241	14722466	MergePeak_15262	0.167092	.	225	1	225	0	SK1G00052719	5.99075	4.96664	-1.02411	-0.0205674	0.0409332	0.890636	1.38792	0.0502997
cluster4	20217297	20217488	MergePeak_15456	0.907675	.	191	1	191	0	SK1G00053130	4.22677	5.29303	1.06625	0.675493	0.00338049	0.533043	2.47102	0.273238
cluster4	20598859	20599080	MergePeak_15482	0.741183	.	221	1	221	0	SK1G00053166	5.5016	4.44981	-1.05179	-0.0394522	0.00566072	0.598249	2.24713	0.223118
cluster4	20908866	20908941	MergePeak_15500	0.167092	.	75	1	75	0	SK1G00053190	3.0446	1.91573	-1.12887	-0.0155533	0.049422	0.890636	1.30608	0.0502997
cluster4	21198791	21198866	MergePeak_15527	0.861033	.	75	1	75	0	SK1G00053217	2.58026	0.93204	-1.64822	-0.0250275	0.00360838	0.550558	2.44269	0.259197
cluster4	21839823	21839898	MergePeak_15601	1.53911	.	75	1	75	0	SK1G00053292	2.26076	1.23767	-1.02309	-0.76237	0.00122541	0.344097	2.91172	0.463319
cluster4	23172964	23173014	MergePeak_15711	0.212092	.	50	1	50	0	SK1G00053446	2.22309	1.1808	-1.04229	-0.0245376	0.0225857	0.863285	1.64617	0.063846
cluster4	24091121	24091321	MergePeak_15816	0.850696	.	200	1	200	0	SK1G00053559	5.3691	3.95851	-1.41059	-0.0353128	0.00382697	0.554517	2.41715	0.256085
cluster4	24397926	24398401	MergePeak_15854	0.855055	.	475	1	475	0	SK1G00053606	5.77547	4.64981	-1.12566	-0.0399127	0.00376494	0.552844	2.42424	0.257397
cluster4	25291340	25293693	MergePeak_15940	0.356665	.	2353	1	2353	0	SK1G00053722	3.00622	1.60459	-1.40163	-0.0203639	0.0149749	0.780968	1.82464	0.107367
cluster4	27191935	27192095	MergePeak_16150	0.818454	.	160	1	160	0	SK1G00053966	3.84041	2.0751	-1.76531	-0.0220904	0.00433883	0.567049	2.36263	0.246379
cluster4	28622112	28622412	MergePeak_16289	0.330483	.	300	1	300	0	SK1G00054147	5.01027	3.86037	-1.1499	-0.0258923	0.0155755	0.79527	1.80756	0.0994852
cluster4	29237539	29237614	MergePeak_16347	0.433218	.	75	1	75	0	SK1G00054210	6.57028	4.25485	-2.31542	-0.0148132	0.0119184	0.740608	1.92378	0.130412
cluster4	29649381	29649556	MergePeak_16392	1.39126	.	175	1	175	0	SK1G00054248	3.44305	2.3949	-1.04816	-0.057511	0.00155018	0.381231	2.80962	0.418812
cluster4	30321592	30321642	MergePeak_16456	3.73077	.	50	1	50	0	SK1G00054328	2.06778	0.154155	-1.91363	-1.623	9.1376e-05	0.075323	4.03917	1.12307
cluster4	30749769	30749944	MergePeak_16474	0.431831	.	175	1	175	0	SK1G00054366	3.76126	2.69459	-1.06667	-0.0299657	0.0121007	0.74132	1.91719	0.129994
cluster4	31217706	31217906	MergePeak_16512	1.00981	.	200	1	200	0	SK1G00054414	5.16331	6.41915	1.25584	0.836339	0.00269605	0.496613	2.56927	0.303982
cluster4	32873224	32874103	MergePeak_16692	0.592961	.	879	1	879	0	SK1G00054614	2.90536	4.05592	1.15056	0.0309192	0.00731251	0.662981	2.13593	0.178499
cluster4	33540902	33541052	MergePeak_16779	0.741183	.	150	1	150	0	SK1G00054692	3.03892	1.7975	-1.24142	-0.0314187	0.00581725	0.598249	2.23528	0.223118
cluster4	34399840	34399965	MergePeak_16887	0.167092	.	125	1	125	0	SK1G00054794	4.23078	5.34482	1.11404	0.0178657	0.0394544	0.890636	1.4039	0.0502997
cluster4	35317000	35317100	MergePeak_16987	0.741183	.	100	1	100	0	SK1G00054910	2.53246	1.44177	-1.09069	-0.0376347	0.00615503	0.598249	2.21077	0.223118
cluster4	35385396	35385546	MergePeak_16993	0.167092	.	150	1	150	0	SK1G00054918	5.18979	3.49566	-1.69413	-0.0142262	0.0394592	0.890636	1.40385	0.0502997
cluster4	35715723	35715910	MergePeak_17056	2.14477	.	187	1	187	0	SK1G00054964	7.36055	6.2493	-1.11125	-0.0683039	0.000522589	0.226131	3.28184	0.64564
cluster5	1536158	1536233	MergePeak_17191	1.00638	.	75	1	75	0	SK1G00066223	0.509181	2.00846	1.49928	1.05033	0.00277157	0.497793	2.55727	0.302951
cluster5	2759073	2759198	MergePeak_17238	0.167092	.	125	1	125	0	SK1G00066321	3.13541	2.10882	-1.02659	-0.0191625	0.0444418	0.890636	1.35221	0.0502997
cluster5	2989983	2990083	MergePeak_17251	0.167092	.	100	1	100	0	SK1G00066347	0.662009	1.85521	1.1932	0.0177306	0.037801	0.890636	1.4225	0.0502997
cluster5	5205451	5205501	MergePeak_17347	0.211276	.	50	1	50	0	SK1G00066532	3.49578	1.68648	-1.8093	-0.01404	0.0230315	0.863773	1.63768	0.0636005
cluster5	6449005	6449155	MergePeak_17377	0.320804	.	150	1	150	0	SK1G00066627	4.38813	2.96104	-1.42709	-0.0205268	0.0160089	0.800624	1.79564	0.0965716
cluster5	8423908	8424333	MergePeak_17476	9.42747	.	425	1	425	0	SK1G00066812	3.22248	1.69955	-1.52293	-1.3888	5.41771e-07	0.00145227	6.26618	2.83795
cluster5	8506529	8506629	MergePeak_17479	0.167092	.	100	1	100	0	SK1G00066817,SK1G00066818	2.59208	1.31514	-1.27694	-0.0166183	0.0352643	0.890636	1.45266	0.0502997
cluster5	8776932	8777107	MergePeak_17486	2.55523	.	175	1	175	0	SK1G00066840	7.15787	3.46167	-3.69621	-0.0171632	0.000323696	0.170137	3.48986	0.769201
cluster5	8795517	8795723	MergePeak_17489	0.167092	.	206	1	206	0	SK1G00066842	3.0323	1.98025	-1.05205	-0.0192303	0.0404987	0.890636	1.39256	0.0502997
cluster5	11706419	11706669	MergePeak_17616	0.741183	.	250	1	250	0	SK1G00067063	7.04842	5.09609	-1.95233	-0.023397	0.00560297	0.598249	2.25158	0.223118
cluster5	13068305	13068355	MergePeak_17646	0.167092	.	50	1	50	0	SK1G00067158	-0.0675542	1.71441	1.78196	0.0135713	0.0359368	0.890636	1.44446	0.0502997
cluster5	14413784	14413834	MergePeak_17691	0.167092	.	50	1	50	0	SK1G00067236	0.649651	1.9328	1.28315	0.0152024	0.049806	0.890636	1.30272	0.0502997
cluster5	18648689	18648839	MergePeak_17751	0.167092	.	150	1	150	0	SK1G00067415	7.52562	5.86432	-1.6613	-0.0128614	0.049854	0.890636	1.3023	0.0502997
cluster5	19703126	19703251	MergePeak_17765	0.167092	.	125	1	125	0	SK1G00067448	6.16189	4.64476	-1.51713	-0.0148885	0.0445285	0.890636	1.35136	0.0502997
cluster5	22625376	22625551	MergePeak_17813	0.167092	.	175	1	175	0	SK1G00067592	2.34384	1.3132	-1.03064	-0.019467	0.041529	0.890636	1.38165	0.0502997
cluster5	23732607	23732757	MergePeak_17853	0.433218	.	150	1	150	0	SK1G00067662	4.60915	2.67407	-1.93508	-0.0166458	0.0117609	0.740608	1.92956	0.130412
cluster5	24228574	24228624	MergePeak_17865	0.473443	.	50	1	50	0	SK1G00067691	1.32804	0.21599	-1.11205	-0.0289448	0.010372	0.720243	1.98414	0.142521
cluster5	26000678	26000728	MergePeak_17956	0.167092	.	50	1	50	0	SK1G00067836	3.56036	2.42923	-1.13113	-0.0188003	0.0345519	0.890636	1.46153	0.0502997
cluster5	26709663	26710013	MergePeak_18009	5.02094	.	350	1	350	0	SK1G00067900	5.57569	3.92855	-1.64714	-1.44189	1.83838e-05	0.0307998	4.73556	1.51145
cluster5	26730892	26731092	MergePeak_18011	4.42205	.	200	1	200	0	SK1G00067901	4.1505	2.23254	-1.91797	-0.0500524	3.36898e-05	0.0466476	4.4725	1.33117
cluster5	26873197	26873372	MergePeak_18020	0.167092	.	175	1	175	0	SK1G00067907	3.08553	1.9894	-1.09613	-0.0177745	0.0423014	0.890636	1.37364	0.0502997
cluster5	27733596	27733646	MergePeak_18063	0.369437	.	50	1	50	0	SK1G00067970	0.227464	1.95288	1.72541	0.0169525	0.0143256	0.774085	1.84389	0.111212
cluster5	28041099	28041149	MergePeak_18088	0.167092	.	50	1	50	0	SK1G00068000	0.873237	2.06159	1.18835	0.0159556	0.0478921	0.890636	1.31974	0.0502997
cluster5	29144218	29147811	MergePeak_18142	0.257411	.	3593	1	3593	0	SK1G00068086	1.73398	3.3043	1.57032	0.0168726	0.0198801	0.836588	1.70158	0.0774884
cluster5	29204207	29206058	MergePeak_18146	0.486738	.	1851	1	1851	0	SK1G00068092	4.25487	3.21297	-1.0419	-0.0338625	0.00915806	0.713637	2.0382	0.146523
cluster5	29826548	29826598	MergePeak_18186	0.299915	.	50	1	50	0	SK1G00068150	0.363682	1.73405	1.37037	0.0212064	0.0171511	0.8123	1.76571	0.0902834
cluster5	30221989	30222064	MergePeak_18219	0.661162	.	75	1	75	0	SK1G00068197	6.14938	2.76749	-3.38189	-0.010462	0.00671405	0.632369	2.17302	0.19903
cluster5	30248979	30249079	MergePeak_18225	0.193134	.	100	1	100	0	SK1G00068202	0.901636	1.91913	1.01749	0.0245552	0.0251745	0.874703	1.59904	0.0581393
cluster5	32303065	32303115	MergePeak_18388	0.167092	.	50	1	50	0	SK1G00068441	3.37832	2.28341	-1.09492	-0.0173829	0.0471361	0.890636	1.32665	0.0502997
cluster6	61278	61478	MergePeak_18462	0.57149	.	200	1	200	0	SK1G00055041	3.31164	4.37475	1.06311	0.0319243	0.00755985	0.672921	2.12149	0.172036
cluster6	1251079	1251129	MergePeak_18611	3.73077	.	50	1	50	0	SK1G00055207	2.57917	1.20834	-1.37083	-1.15386	9.27277e-05	0.075323	4.03279	1.12307
cluster6	1501437	1501612	MergePeak_18648	0.167092	.	175	1	175	0	SK1G00055242	4.15662	2.59237	-1.56424	-0.0133248	0.0358779	0.890636	1.44517	0.0502997
cluster6	2188925	2189700	MergePeak_18737	0.197834	.	775	1	775	0	SK1G00055332	3.43472	2.38885	-1.04587	-0.0244736	0.0243103	0.871859	1.61421	0.0595539
cluster6	2541465	2541610	MergePeak_18778	1.88789	.	145	1	145	0	SK1G00055380	3.67861	2.29461	-1.384	-1.07046	0.00081861	0.270202	3.08692	0.568312
cluster6	3469448	3469573	MergePeak_18871	0.473443	.	125	1	125	0	SK1G00055503	3.74933	2.54913	-1.2002	-0.0275219	0.0105782	0.720243	1.97559	0.142521
cluster6	5072740	5073260	MergePeak_19010	0.252163	.	520	1	520	0	SK1G00055690	4.08464	5.33761	1.25297	0.0204177	0.0200796	0.839637	1.69725	0.0759085
cluster6	5260966	5261681	MergePeak_19024	0.197834	.	715	1	715	0	SK1G00055707	0.801682	1.88773	1.08605	0.0235539	0.0239334	0.871859	1.621	0.0595539
cluster6	5435942	5436845	MergePeak_19040	0.167092	.	903	1	903	0	SK1G00055724	0.924746	2.3082	1.38346	0.0146757	0.0411988	0.890636	1.38512	0.0502997
cluster6	6042719	6042994	MergePeak_19098	0.167092	.	275	1	275	0	SK1G00055799	3.87903	2.81718	-1.06186	-0.0179958	0.0450209	0.890636	1.34659	0.0502997
cluster6	7597306	7597431	MergePeak_19182	1.93224	.	125	1	125	0	SK1G00055980	1.83205	0.8039	-1.02815	-0.794113	0.000755987	0.262021	3.12149	0.581663
cluster6	12609084	12609159	MergePeak_19430	0.855055	.	75	1	75	0	SK1G00056397	3.88908	5.48067	1.59159	0.970425	0.0036545	0.552844	2.43717	0.257397
cluster6	13365614	13365754	MergePeak_19462	0.198452	.	140	1	140	0	SK1G00056453	0.366274	1.44798	1.08171	0.023393	0.0235609	0.871485	1.62781	0.05974
cluster6	14470941	14471041	MergePeak_19505	0.167092	.	100	1	100	0	SK1G00056518	3.41108	1.92425	-1.48683	-0.0127361	0.0474167	0.890636	1.32407	0.0502997
cluster6	16562341	16562391	MergePeak_19578	0.741183	.	50	1	50	0	SK1G00056608	2.66952	1.28127	-1.38825	-0.0275283	0.00578863	0.598249	2.23742	0.223118
cluster6	16591677	16591877	MergePeak_19582	6.19375	.	200	1	200	0	SK1G00056609	2.27633	1.01938	-1.25694	-1.11761	7.13496e-06	0.0136614	5.14661	1.8645
cluster6	16596548	16596648	MergePeak_19591	0.29404	.	100	1	100	0	SK1G00056609	2.43496	1.3802	-1.05476	-0.0261341	0.0177848	0.815615	1.74995	0.0885148
cluster6	17768710	17768835	MergePeak_19620	1.26323	.	125	1	125	0	SK1G00056671	2.08608	3.67896	1.59288	1.13726	0.00183392	0.416611	2.73662	0.38027
cluster6	19629725	19629900	MergePeak_19683	0.211276	.	175	1	175	0	SK1G00056793	4.48869	3.40152	-1.08717	-0.0228254	0.0229975	0.863773	1.63832	0.0636005
cluster6	19889291	19889491	MergePeak_19692	1.94073	.	200	1	200	0	SK1G00056812	2.98642	1.72258	-1.26384	-0.980165	0.000719086	0.260484	3.14322	0.584219
cluster6	21195219	21195269	MergePeak_19749	1.53911	.	50	1	50	0	SK1G00056918	3.40694	5.92785	2.52091	2.07404	0.00124515	0.344097	2.90478	0.463319
cluster6	21488856	21488906	MergePeak_19757	0.288853	.	50	1	50	0	SK1G00056939	2.25805	0.953175	-1.30487	-0.0209586	0.0180163	0.818553	1.74433	0.0869533
cluster6	21551113	21551163	MergePeak_19762	0.528655	.	50	1	50	0	SK1G00056946	-1.42297	0.993962	2.41694	0.0143173	0.00871479	0.693201	2.05974	0.159141
cluster6	22151867	22152254	MergePeak_19791	0.473443	.	387	1	387	0	SK1G00057003	-0.21299	1.55575	1.76874	0.0194875	0.0095417	0.720243	2.02037	0.142521
cluster6	22345936	22346036	MergePeak_19804	0.223375	.	100	1	100	0	SK1G00057016	3.23572	2.0774	-1.15832	-0.0220622	0.0222216	0.856559	1.65322	0.0672427
cluster6	22970854	22971029	MergePeak_19833	2.19253	.	175	1	175	0	SK1G00057058	7.49544	4.35649	-3.13896	-0.0228672	0.000425258	0.218767	3.37135	0.660018
cluster6	23565136	23565186	MergePeak_19848	0.450153	.	50	1	50	0	SK1G00057096	2.10982	0.824603	-1.28522	-0.0245423	0.0112228	0.731965	1.9499	0.135509
cluster6	23851981	23852081	MergePeak_19874	0.252163	.	100	1	100	0	SK1G00057128	1.03618	2.306	1.26982	0.0217982	0.0201496	0.839637	1.69573	0.0759085
cluster6	25167105	25167330	MergePeak_19935	0.167092	.	225	1	225	0	SK1G00057244	7.32483	5.61576	-1.70907	-0.0151323	0.0349288	0.890636	1.45682	0.0502997
cluster6	27142305	27142355	MergePeak_20095	0.818454	.	50	1	50	0	SK1G00057450	1.64955	0.500255	-1.1493	-0.679726	0.00414743	0.567049	2.38222	0.246379
cluster6	28155020	28155145	MergePeak_20195	0.167092	.	125	1	125	0	SK1G00057556	5.00753	3.69234	-1.31519	-0.0183261	0.0309178	0.890636	1.50979	0.0502997
cluster6	28444270	28444345	MergePeak_20232	0.473443	.	75	1	75	0	SK1G00057596	0.668223	2.29326	1.62504	0.0212508	0.010034	0.720243	1.99853	0.142521
cluster6	28946719	28946869	MergePeak_20276	0.433218	.	150	1	150	0	SK1G00057651	3.37483	4.52835	1.15352	0.026199	0.0116794	0.740608	1.93258	0.130412
cluster6	29609470	29609820	MergePeak_20345	27.4905	.	350	1	350	0	SK1G00057729	3.86235	2.00649	-1.85586	-1.78263	3.95658e-13	5.30301e-09	12.4027	8.27548
cluster6	29612095	29612295	MergePeak_20348	2.14477	.	200	1	200	0	SK1G00057729	3.27676	2.04783	-1.22893	-0.96806	0.000565201	0.226131	3.2478	0.64564
cluster6	29907949	29908068	MergePeak_20376	0.273784	.	119	1	119	0	SK1G00057763	4.80833	6.15329	1.34496	0.0178286	0.0193651	0.827147	1.71298	0.0824171
cluster6	30600404	30600454	MergePeak_20460	1.00638	.	50	1	50	0	SK1G00057857	0.071821	2.95978	2.88796	1.84614	0.00280908	0.497793	2.55144	0.302951
cluster6	30715191	30715341	MergePeak_20469	0.167092	.	150	1	150	0	SK1G00057865	4.60579	5.95768	1.35189	0.0143992	0.0373762	0.890636	1.42741	0.0502997
cluster6	30973723	30975729	MergePeak_20494	0.239427	.	2006	1	2006	0	SK1G00057896	4.84499	3.39556	-1.44943	-0.0202556	0.0207639	0.847082	1.68269	0.0720748
cluster7	891528	891678	MergePeak_20705	0.259259	.	150	1	150	0	SK1G00058137	3.02592	1.85479	-1.17114	-0.0228873	0.0197633	0.835517	1.70414	0.0780446
cluster7	1532539	1532939	MergePeak_20798	0.588368	.	400	1	400	0	SK1G00058208	5.83111	4.32625	-1.50486	-0.0255903	0.0073938	0.665095	2.13113	0.177116
cluster7	2967697	2973166	MergePeak_20928	0.167092	.	5469	1	5469	0	SK1G00058381	3.68193	2.6286	-1.05333	-0.0182125	0.0449745	0.890636	1.34703	0.0502997
cluster7	3645600	3645700	MergePeak_20974	0.197834	.	100	1	100	0	SK1G00058438	3.43833	2.31924	-1.11909	-0.0230177	0.0240644	0.871859	1.61862	0.0595539
cluster7	3784635	3784910	MergePeak_20986	0.473443	.	275	1	275	0	SK1G00058448	3.8301	2.82985	-1.00025	-0.0346701	0.0102068	0.720243	1.99111	0.142521
cluster7	5015880	5015930	MergePeak_21078	0.226353	.	50	1	50	0	SK1G00058565	-0.61409	1.15557	1.76966	0.0157425	0.0216627	0.854793	1.66429	0.0681391
cluster7	5022732	5023082	MergePeak_21081	4.11308	.	350	1	350	0	SK1G00058565	0.918332	2.19593	1.2776	1.09265	6.56361e-05	0.0577883	4.18286	1.23816
cluster7	5687755	5688080	MergePeak_21128	0.741183	.	325	1	325	0	SK1G00058624	4.60876	3.57486	-1.0339	-0.0406035	0.0056946	0.598249	2.24454	0.223118
cluster7	6095674	6095799	MergePeak_21149	0.167092	.	125	1	125	0	SK1G00058655	4.17446	5.2992	1.12473	0.018546	0.0351521	0.890636	1.45405	0.0502997
cluster7	6209752	6209877	MergePeak_21152	0.167092	.	125	1	125	0	SK1G00058664	6.88379	5.1924	-1.69139	-0.0141357	0.0395217	0.890636	1.40316	0.0502997
cluster7	6361510	6361585	MergePeak_21157	0.167092	.	75	1	75	0	SK1G00058674	6.72619	4.88099	-1.8452	-0.0123335	0.0383804	0.890636	1.41589	0.0502997
cluster7	13232217	13232367	MergePeak_21328	0.448891	.	150	1	150	0	SK1G00059064	2.97672	1.92099	-1.05573	-0.0306326	0.0112599	0.732606	1.94846	0.13513
cluster7	13984709	13984884	MergePeak_21375	5.06782	.	175	1	175	0	SK1G00059125	2.27764	1.21567	-1.06197	-0.931462	1.66838e-05	0.029815	4.77771	1.52556
cluster7	14713376	14713426	MergePeak_21404	0.167092	.	50	1	50	0	SK1G00059164	3.66151	1.90119	-1.76033	-0.0113488	0.0432665	0.890636	1.36385	0.0502997
cluster7	15499292	15499367	MergePeak_21455	0.197834	.	75	1	75	0	SK1G00059224	2.51145	3.72937	1.21792	0.0199638	0.024397	0.871859	1.61266	0.0595539
cluster7	16259104	16259279	MergePeak_21469	0.411796	.	175	1	175	0	SK1G00059269	11.7647	9.41369	-2.35097	-0.0141446	0.0129272	0.751687	1.88849	0.123963
cluster7	19899416	19899516	MergePeak_21710	0.57149	.	100	1	100	0	SK1G00059588	5.46433	3.74526	-1.71907	-0.0218695	0.00760843	0.672921	2.1187	0.172036
cluster7	20748259	20748309	MergePeak_21782	0.197834	.	50	1	50	0	SK1G00059666	2.85386	1.68312	-1.17074	-0.0209162	0.0244138	0.871859	1.61237	0.0595539
cluster7	21966355	21966455	MergePeak_21888	0.307449	.	100	1	100	0	SK1G00059787	2.62278	1.27457	-1.34821	-0.0204226	0.0166702	0.808069	1.77806	0.0925513
cluster7	24282927	24283077	MergePeak_22112	0.473443	.	150	1	150	0	SK1G00060046	3.75921	2.75162	-1.00759	-0.0342956	0.0106113	0.720243	1.97423	0.142521
cluster7	24793140	24793290	MergePeak_22157	0.167092	.	150	1	150	0	SK1G00060117	4.86663	3.44432	-1.42231	-0.0161288	0.0327773	0.890636	1.48443	0.0502997
cluster7	25301772	25301972	MergePeak_22227	2.89874	.	200	1	200	0	SK1G00060180	3.61166	4.88731	1.27565	1.04417	0.000229923	0.134089	3.63842	0.872608
cluster7	25585574	25585749	MergePeak_22258	0.495203	.	175	1	175	0	SK1G00060212	3.03726	1.62843	-1.40884	-0.0241252	0.00905155	0.709462	2.04328	0.149071
cluster7	26094242	26094292	MergePeak_22296	0.226353	.	50	1	50	0	SK1G00060281	3.70872	2.2008	-1.50793	-0.0179434	0.0216587	0.854793	1.66437	0.0681391
cluster7	26740857	26741032	MergePeak_22350	0.433218	.	175	1	175	0	SK1G00060336	3.71186	4.72017	1.00831	0.0312363	0.0117957	0.740608	1.92827	0.130412
cluster7	27881663	27881713	MergePeak_22484	0.167092	.	50	1	50	0	SK1G00060487	2.49547	5.53345	3.03798	0.00649971	0.0325405	0.890636	1.48758	0.0502997
cluster7	28380953	28381053	MergePeak_22541	0.167092	.	100	1	100	0	SK1G00060549	6.891	5.34884	-1.54216	-0.0172737	0.0386959	0.890636	1.41234	0.0502997
cluster7	29604738	29604788	MergePeak_22689	0.167092	.	50	1	50	0	SK1G00060714	6.0281	4.00808	-2.02002	-0.011019	0.0320918	0.890636	1.49361	0.0502997
cluster7	30356509	30356767	MergePeak_22770	1.93224	.	258	1	258	0	SK1G00060817	4.28307	2.50019	-1.78288	-0.0353764	0.000762376	0.262021	3.11783	0.581663
cluster7	30512360	30512535	MergePeak_22792	2.14477	.	175	1	175	0	SK1G00060833	3.32069	1.94929	-1.37139	-0.0510693	0.000552502	0.226131	3.25767	0.64564
cluster8	451165	451303	MergePeak_22875	0.278422	.	138	1	138	0	SK1G00060916	6.08923	4.32031	-1.76892	-0.0160675	0.0186947	0.824493	1.72828	0.0838133
cluster8	2024980	2025030	MergePeak_23054	0.167092	.	50	1	50	0	SK1G00061095	2.57737	1.5757	-1.00167	-0.0214935	0.0350554	0.890636	1.45524	0.0502997
cluster8	3626326	3626376	MergePeak_23226	0.167092	.	50	1	50	0	SK1G00061273	2.06074	3.32871	1.26797	0.016327	0.0378063	0.890636	1.42244	0.0502997
cluster8	5041738	5041913	MergePeak_23371	1.13363	.	175	1	175	0	SK1G00061444	2.87251	1.54313	-1.32938	-0.0372131	0.00227833	0.455768	2.64238	0.341256
cluster8	6057456	6057506	MergePeak_23451	8.36281	.	50	1	50	0	SK1G00061570	2.37273	0.23618	-2.13655	-1.93337	1.35985e-06	0.00303768	5.86651	2.51746
cluster8	6057531	6057697	MergePeak_23452	4.38583	.	166	1	166	0	SK1G00061570	2.18577	0.710763	-1.47501	-1.27459	3.79394e-05	0.0478335	4.42091	1.32027
cluster8	6733089	6735720	MergePeak_23541	0.239427	.	2631	1	2631	0	SK1G00061657	2.80576	1.7661	-1.03966	-0.0255268	0.0207476	0.847082	1.68303	0.0720748
cluster8	7258503	7258553	MergePeak_23588	0.167092	.	50	1	50	0	SK1G00061715	4.59282	3.08072	-1.51209	-0.0139089	0.042772	0.890636	1.36884	0.0502997
cluster8	8101656	8101756	MergePeak_23666	0.473443	.	100	1	100	0	SK1G00061804	4.40352	2.38531	-2.01822	-0.0185348	0.0102669	0.720243	1.98856	0.142521
cluster8	10041207	10041332	MergePeak_23798	2.14477	.	125	1	125	0	SK1G00061992	3.02831	1.95905	-1.06926	-0.849382	0.000499553	0.226131	3.30142	0.64564
cluster8	10270798	10270923	MergePeak_23812	0.278855	.	125	1	125	0	SK1G00062014	2.28377	1.23188	-1.05189	-0.02611	0.0184097	0.824245	1.73495	0.0839437
cluster8	10370870	10371045	MergePeak_23817	0.188011	.	175	1	175	0	SK1G00062027	7.97208	5.77524	-2.19683	-0.0104396	0.0267013	0.877815	1.57347	0.056597
cluster8	10635751	10635826	MergePeak_23833	0.275669	.	75	1	75	0	SK1G00062050	3.02455	1.99977	-1.02479	-0.0278732	0.0188597	0.826067	1.72447	0.0829846
cluster8	11765924	11766074	MergePeak_23918	1.74153	.	150	1	150	0	SK1G00062144	4.27021	2.77223	-1.49798	-0.0423306	0.000969786	0.299052	3.01332	0.524254
cluster8	12988294	12988514	MergePeak_23988	0.913301	.	220	1	220	0	SK1G00062232	3.81678	2.74259	-1.07419	-0.695277	0.00332127	0.530969	2.4787	0.274931
cluster8	14380901	14380951	MergePeak_24034	0.403383	.	50	1	50	0	SK1G00062313,SK1G00062314	2.0942	3.63518	1.54099	0.0193334	0.0130311	0.756083	1.88502	0.12143
cluster8	14757221	14757614	MergePeak_24046	3.00879	.	393	1	393	0	SK1G00062335	3.63133	2.29196	-1.33937	-0.0718344	0.000194661	0.12424	3.71072	0.905737
cluster8	16297808	16297958	MergePeak_24110	0.167092	.	150	1	150	0	SK1G00062428	2.56419	3.70759	1.1434	0.0195429	0.0301898	0.890636	1.52014	0.0502997
cluster8	18289323	18289398	MergePeak_24163	0.433218	.	75	1	75	0	SK1G00062531	2.34876	1.33081	-1.01795	-0.0307313	0.0119106	0.740608	1.92407	0.130412
cluster8	20464373	20464423	MergePeak_24195	0.601817	.	50	1	50	0	SK1G00062639	0.452087	1.93295	1.48086	0.0243169	0.00722687	0.658924	2.14105	0.181165
cluster8	20787054	20787104	MergePeak_24212	0.543466	.	50	1	50	0	SK1G00062670	1.32433	3.67986	2.35553	0.0143885	0.00847221	0.686121	2.072	0.163599
cluster8	21390586	21390636	MergePeak_24225	0.447663	.	50	1	50	0	SK1G00062707	1.98719	0.95605	-1.03114	-0.0310682	0.0114055	0.73323	1.94289	0.13476
cluster8	23297893	23297993	MergePeak_24303	0.431831	.	100	1	100	0	SK1G00062851	0.684761	1.96905	1.28429	0.0247862	0.0121448	0.74132	1.91561	0.129994
cluster8	23834210	23834385	MergePeak_24332	0.741183	.	175	1	175	0	SK1G00062897	0.466879	1.82111	1.35423	0.0292522	0.00596267	0.598249	2.22456	0.223118
cluster8	24281561	24281844	MergePeak_24362	0.167092	.	283	1	283	0	SK1G00062935	2.6559	1.52538	-1.13052	-0.016439	0.0474968	0.890636	1.32334	0.0502997
cluster8	25414236	25415399	MergePeak_24416	2.09618	.	1163	1	1163	0	SK1G00063025	2.25162	0.900281	-1.35134	-1.05689	0.000619462	0.233877	3.20799	0.631012
cluster8	27212588	27212663	MergePeak_24553	0.666308	.	75	1	75	0	SK1G00063216	6.45784	3.98275	-2.47509	-0.0153553	0.00665236	0.630117	2.17702	0.200579
cluster8	27323866	27323916	MergePeak_24566	0.167092	.	50	1	50	0	SK1G00063230	5.02248	6.61864	1.59616	0.0102869	0.0478587	0.890636	1.32004	0.0502997
cluster8	27361743	27362044	MergePeak_24572	0.167092	.	301	1	301	0	SK1G00063235	0.900926	2.07562	1.1747	0.0188839	0.0349744	0.890636	1.45625	0.0502997
cluster8	28418557	28418757	MergePeak_24686	4.24318	.	200	1	200	0	SK1G00063358	3.99754	2.86858	-1.12895	-0.972682	4.92474e-05	0.0528051	4.30762	1.27732
cluster8	28661469	28661519	MergePeak_24704	0.295555	.	50	1	50	0	SK1G00063387	2.02482	0.589129	-1.43569	-0.0189185	0.0175115	0.814759	1.75668	0.088971
cluster8	29422782	29425220	MergePeak_24754	0.431831	.	2438	1	2438	0	SK1G00063457	0.882861	2.47153	1.58867	0.0192085	0.0123545	0.74132	1.90818	0.129994
cluster8	29804080	29804180	MergePeak_24777	0.167092	.	100	1	100	0	SK1G00063500	0.374035	2.45635	2.08231	0.0104292	0.0325616	0.890636	1.48729	0.0502997
cluster8	30546120	30546220	MergePeak_24822	0.175399	.	100	1	100	0	SK1G00063563	1.00531	2.01241	1.0071	0.0242723	0.0284097	0.885523	1.54653	0.0528003
cluster9	1552025	1552287	MergePeak_24990	0.801575	.	262	1	262	0	SK1G00063752	5.83019	4.16959	-1.6606	-0.0309295	0.00448945	0.573722	2.34781	0.241298
cluster9	2217502	2217668	MergePeak_25057	0.211302	.	166	1	166	0	SK1G00063827	1.44561	2.61324	1.16763	0.0216726	0.022878	0.863757	1.64058	0.0636082
cluster9	2700039	2700164	MergePeak_25099	0.473443	.	125	1	125	0	SK1G00063881	6.24873	3.56041	-2.68832	-0.0135018	0.0099764	0.720243	2.00103	0.142521
cluster9	3678389	3678439	MergePeak_25202	1.90927	.	50	1	50	0	SK1G00064006	2.45976	1.13023	-1.32953	-1.02934	0.00079006	0.266228	3.10234	0.574746
cluster9	5353198	5353248	MergePeak_25357	1.53911	.	50	1	50	0	SK1G00064207	3.6856	1.5874	-2.09821	-0.0265995	0.00121952	0.344097	2.91381	0.463319
cluster9	6546264	6546414	MergePeak_25423	0.190294	.	150	1	150	0	SK1G00064315	6.0535	5.03787	-1.01563	-0.0238789	0.0260574	0.876427	1.58407	0.0572842
cluster9	8552203	8552303	MergePeak_25553	0.167092	.	100	1	100	0	SK1G00064496	5.47319	4.22434	-1.24885	-0.0179297	0.0415873	0.890636	1.38104	0.0502997
cluster9	9226754	9226804	MergePeak_25586	0.191059	.	50	1	50	0	SK1G00064571	2.97306	4.46156	1.4885	0.0158308	0.0255699	0.875963	1.59227	0.0575145
cluster9	11356273	11356598	MergePeak_25678	0.801575	.	325	1	325	0	SK1G00064748	3.26414	2.20378	-1.06036	-0.0391066	0.00471766	0.573722	2.32627	0.241298
cluster9	12354335	12354435	MergePeak_25697	0.197834	.	100	1	100	0	SK1G00064795	3.15501	1.85195	-1.30307	-0.0192371	0.0237842	0.871859	1.62371	0.0595539
cluster9	12676094	12676194	MergePeak_25715	1.4796	.	100	1	100	0	SK1G00064816	6.08444	3.83336	-2.25109	-0.0322162	0.00135109	0.358588	2.86931	0.445404
cluster9	13887919	13888044	MergePeak_25732	1.46084	.	125	1	125	0	SK1G00064874	3.00085	1.1825	-1.81834	-0.0277196	0.00140943	0.363281	2.85096	0.439758
cluster9	16249924	16250024	MergePeak_25815	0.188011	.	100	1	100	0	SK1G00065008	2.30701	4.28835	1.98134	0.011475	0.0268481	0.877815	1.57109	0.056597
cluster9	17948455	17948555	MergePeak_25843	0.193134	.	100	1	100	0	SK1G00065069	4.16972	2.98976	-1.17996	-0.0218811	0.0251053	0.874703	1.60024	0.0581393
cluster9	19125174	19125224	MergePeak_25880	0.57149	.	50	1	50	0	SK1G00065142	3.06364	1.26626	-1.79737	-0.0201183	0.00783225	0.672921	2.10611	0.172036
cluster9	20391011	20391086	MergePeak_25920	4.11308	.	75	1	75	0	SK1G00065233	2.06544	0.667338	-1.39811	-1.19622	6.31626e-05	0.0577883	4.19954	1.23816
cluster9	20391361	20391636	MergePeak_25921	9.88427	.	275	1	275	0	SK1G00065233	2.22489	0.758209	-1.46668	-1.34198	3.55262e-07	0.00105813	6.44945	2.97546
cluster9	21363626	21363951	MergePeak_25968	1.90927	.	325	1	325	0	SK1G00065307	4.17702	2.63256	-1.54446	-1.18917	0.000794532	0.266228	3.09989	0.574746
cluster9	21408762	21411811	MergePeak_25974	4.65191	.	3049	1	3049	0	SK1G00065312	5.21023	3.76522	-1.445	-1.25171	2.671e-05	0.0397772	4.57333	1.40037
cluster9	22668698	22668748	MergePeak_26016	0.288853	.	50	1	50	0	SK1G00065409	0.290753	1.99982	1.70907	0.0175127	0.0180155	0.818553	1.74435	0.0869533
cluster9	24342979	24352449	MergePeak_26084	0.167092	.	9470	1	9470	0	SK1G00065504	1.59479	2.7793	1.18451	0.0189847	0.0308931	0.890636	1.51014	0.0502997
cluster9	27012898	27012948	MergePeak_26230	0.278422	.	50	1	50	0	SK1G00065725	5.91237	3.67796	-2.23441	-0.0123606	0.0185225	0.824493	1.7323	0.0838133
cluster9	28340824	28340874	MergePeak_26345	0.568509	.	50	1	50	0	SK1G00065847	1.08676	2.22605	1.13929	0.0313413	0.00795564	0.674313	2.09932	0.171138
cluster9	28352733	28352833	MergePeak_26350	0.167092	.	100	1	100	0	SK1G00065849	3.41854	2.04801	-1.37053	-0.0151441	0.0396179	0.890636	1.40211	0.0502997
cluster9	28462100	28462200	MergePeak_26363	0.193134	.	100	1	100	0	SK1G00065864	0.952353	2.04327	1.09091	0.0227074	0.0253294	0.874703	1.59638	0.0581393
cluster9	30235918	30236393	MergePeak_26489	16.0388	.	475	1	475	0	SK1G00066051	3.76742	2.37062	-1.3968	-1.31241	2.21653e-09	1.48541e-05	8.65433	4.82815
cluster9	30257747	30257822	MergePeak_26493	0.167092	.	75	1	75	0	SK1G00066055	3.09308	1.19108	-1.902	-0.0118395	0.0304297	0.890636	1.5167	0.0502997
cluster9	30545734	30545784	MergePeak_26525	0.741183	.	50	1	50	0	SK1G00066092	2.39019	0.72211	-1.66808	-0.0223248	0.00589822	0.598249	2.22928	0.223118
fragment19	340815	340865	MergePeak_26670	0.167092	.	50	1	50	0	SK1G00074854	5.14403	3.16204	-1.98199	-0.0106638	0.0368243	0.890636	1.43387	0.0502997
fragment21	345041	345141	MergePeak_26807	0.411796	.	100	1	100	0	SK1G00074982	0.720672	2.19429	1.47362	0.0216058	0.0129245	0.751687	1.88859	0.123963
fragment21	399527	399680	MergePeak_26816	0.167092	.	153	1	153	0	SK1G00074992	3.42423	1.90623	-1.518	-0.0143958	0.0381667	0.890636	1.41831	0.0502997
