# Supplementary material for: Multiomics analysis of the molecular and single-cell responses of rice after deep-space flight on Chang'e-5
Source: Research Square preprint supplement (doi:10.21203/rs.3.rs-7211908/v1), 2025-08-22
Supplement: Supplementary file 8 [file d421828599a6fd41225808c8.xlsx]

## Sheet: HMG
Supplementary Data 1. Genetic structural characteristics of HMG, LMG, and NMG.
Gene ID	Variant number	Loci	Length (bp)	GC (%)	Exon number	Exon length (bp)	Exon GC(%)	Intron number	Intron length (bp)	Intron GC (%)	5'UTR length (bp)	5'UTR GC (%)	3'UTR length (bp)	3'UTR GC (%)
SK1G00069465	246	cluster10:9881956-9915591	33636	38.8	9	9746	42.15	8	23890	37.43	--	--	3166	42.92
SK1G00069708	199	cluster10:14640655-14678818	38164	43.02	6	4808	42.33	5	33356	43.12	1388	57.2	3060	34.74
SK1G00049993	191	cluster3:17413864-17429006	15143	36.39	21	4218	46.42	20	10925	32.51	--	--	--	--
SK1G00069550	190	cluster10:11597930-11610958	13029	37.92	10	1053	52.9	9	11976	36.6	--	--	--	--
SK1G00074392	183	cluster12:20854757-20868701	13945	41	28	3578	53.97	27	10367	36.52	26	69.23	794	39.29
SK1G00032702	181	cluster10:7331075-7343800	12726	40.23	7	1155	52.81	6	11571	38.98	--	--	--	--
SK1G00069483	169	cluster10:10455775-10472372	16598	37.32	11	4007	42.8	10	12591	35.57	--	--	3623	40.41
SK1G00053034	168	cluster4:19290264-19306287	16024	40.8	6	4026	47.67	5	11998	38.49	--	--	--	--
SK1G00068327	166	cluster5:31313993-31320676	6684	45.84	4	885	45.88	3	5799	45.84	--	--	--	--
SK1G00069561	161	cluster10:12011065-12026446	15382	42.35	3	3295	47.92	2	12087	40.83	2894	47.89	89	41.57
SK1G00069278	156	cluster10:7029389-7038313	8925	37.64	11	1781	44.41	10	7144	35.95	197	59.39	1870	42.51
SK1G00065615	151	cluster9:25957878-26010080	52203	43.21	37	13735	50.58	36	38468	40.58	162	56.17	2180	47.48
SK1G00040322	150	cluster1:8166868-8205382	38515	40.64	47	11052	46.14	46	27463	38.43	--	--	--	--
SK1G00065710	147	cluster9:26860675-26888344	27670	40.25	13	4394	47.95	12	23276	38.8	3717	48.51	245	39.59
SK1G00054567	140	cluster4:32455673-32507479	51807	39.31	120	16457	47.23	119	35350	35.62	--	--	955	43.87
SK1G00069474	139	cluster10:10110384-10127817	17434	38.84	19	4306	45.26	18	13128	36.74	293	66.55	392	35.71
SK1G00059648	138	cluster7:20552484-20620018	67535	51.95	2	1567	64.26	1	65968	51.66	41	58.54	221	39.82
SK1G00065517	137	cluster9:24527909-24541925	14017	40.89	9	5691	48.57	8	8326	35.65	231	64.5	135	34.81
SK1G00069549	137	cluster10:11543207-11588786	45580	45.51	11	2238	50.8	10	43342	45.24	1064	54.7	778	50
SK1G00066787	132	cluster5:8052883-8088492	35610	40.28	8	9707	44.04	7	25903	38.86	38	44.74	--	--
SK1G00069432	132	cluster10:9388463-9398539	10077	40.91	7	4567	47.89	6	5510	35.14	132	65.91	334	38.92
SK1G00068422	130	cluster5:32112824-32121973	9150	43.6	8	4762	50.04	7	4388	36.6	--	--	4300	46.95
SK1G00047272	121	cluster2:33588357-33596635	8279	40.63	9	2328	50	8	5951	36.97	--	--	--	--
SK1G00069666	121	cluster10:13987606-14000153	12548	39.31	13	1791	49.58	12	10757	37.59	--	--	--	--
SK1G00069433	120	cluster10:9400641-9407879	7239	39.88	14	3423	45.75	13	3816	34.62	121	71.07	296	38.18
SK1G00055909	119	cluster6:6996387-7005165	8779	37.04	7	1689	42.27	6	7090	35.8	--	--	--	--
SK1G00069636	118	cluster10:13425572-13432141	6570	42.51	2	2178	56.93	1	4392	35.36	--	--	--	--
SK1G00049399	113	cluster3:11234242-11239963	5722	40.07	8	1434	42.82	7	4288	39.16	--	--	--	--
SK1G00068324	110	cluster5:31276995-31285852	8858	40.96	6	1809	53.07	5	7049	37.85	--	--	--	--
SK1G00069562	109	cluster10:12027174-12042637	15464	42.21	17	11610	44.47	16	3854	35.42	--	--	549	44.08
SK1G00060296	108	cluster7:26211425-26215714	4290	52.24	6	3234	52.29	5	1056	52.08	--	--	--	--
SK1G00066711	103	cluster5:7188267-7201556	13290	37.67	15	2361	47.56	14	10929	35.54	--	--	--	--
SK1G00059439	102	cluster7:18314567-18345895	31329	41.71	38	5202	45.87	37	26127	40.88	--	--	--	--
SK1G00069405	102	cluster10:9064066-9072842	8777	41.78	6	4541	46.18	5	4236	37.06	833	63.39	1272	32.47
SK1G00069475	101	cluster10:10130413-10139358	8946	37.69	7	6057	39.59	6	2889	33.71	--	--	5409	36.11
SK1G00069369	100	cluster10:8569085-8584186	15102	41.17	15	5049	41.08	14	10053	41.21	832	51.08	3626	38.61
SK1G00069542	100	cluster10:11410721-11416951	6231	38.69	3	378	46.56	2	5853	38.19	--	--	--	--
SK1G00069560	100	cluster10:12000554-12013769	13216	41.84	7	1473	44.94	6	11743	41.45	396	40.4	297	41.41
SK1G00041610	99	cluster1:19414218-19434332	20115	48.71	19	7563	62.78	18	12552	40.24	--	--	--	--
SK1G00059401	99	cluster7:17728585-17731230	2646	37.15	4	1188	41.58	3	1458	33.54	--	--	--	--
SK1G00066522	99	cluster5:5046278-5069713	23436	46.27	13	8177	52.92	12	15259	42.71	--	--	271	48.34
SK1G00055592	97	cluster6:4251928-4257253	5326	42.43	6	3235	44.91	5	2091	38.59	807	43.37	337	39.17
SK1G00065539	97	cluster9:24789781-24904046	114266	45.85	6	1168	47.95	5	113098	45.83	581	57.31	275	36.73
SK1G00069281	97	cluster10:7076217-7079872	3656	48.61	4	2243	58.89	3	1413	32.27	55	30.91	388	32.73
SK1G00069401	97	cluster10:9027271-9035715	8445	39.15	8	2634	47.91	7	5811	35.17	--	--	354	38.7
SK1G00069406	97	cluster10:9082386-9087752	5367	39.67	4	381	48.29	3	4986	39.01	--	--	--	--
SK1G00041535	94	cluster1:18613728-18648804	35077	43.17	62	13445	50.86	61	21632	38.38	191	61.78	--	--
SK1G00052086	94	cluster4:3065704-3069345	3642	42.61	3	690	47.54	2	2952	41.46	--	--	--	--
SK1G00064553	94	cluster9:9050717-9056559	5843	50.83	3	1470	64.49	2	4373	46.24	--	--	--	--
SK1G00073850	94	cluster12:15448959-15457837	8879	38.81	12	1659	61.12	11	7220	33.68	--	--	--	--
SK1G00056249	93	cluster6:10634199-10662675	28477	41.81	17	8489	44	16	19988	40.87	--	--	494	41.9
SK1G00065682	92	cluster9:26569410-26600175	30766	43.88	9	7032	46.2	8	23734	43.19	--	--	--	--
SK1G00068058	92	cluster5:28840490-28863409	22920	37.2	17	2380	46.68	16	20540	36.11	20	55	218	32.11
SK1G00068326	92	cluster5:31301810-31304331	2522	45.52	5	1167	48.07	4	1355	43.32	--	--	--	--
SK1G00069526	92	cluster10:11255071-11260454	5384	44.82	7	2070	56.67	6	3314	37.42	--	--	--	--
SK1G00069529	92	cluster10:11299241-11303257	4017	47.67	4	2091	57.63	3	1926	36.86	102	72.55	393	44.27
SK1G00074414	92	cluster12:21063824-21071369	7546	39.11	14	2021	47.25	13	5525	36.13	26	80.77	--	--
SK1G00045570	91	cluster2:15340996-15344212	3217	39.66	8	1998	42.29	7	1219	35.36	--	--	--	--
SK1G00070177	91	cluster10:20763977-20770329	6353	43.92	3	459	68.85	2	5894	41.97	--	--	--	--
SK1G00041881	90	cluster1:22082526-22109130	26605	40.61	22	4212	49.64	21	22393	38.91	--	--	--	--
SK1G00066834	90	cluster5:8726959-8744777	17819	42.12	6	6225	44.24	5	11594	40.98	--	--	--	--
SK1G00043138	89	cluster1:37154086-37178431	24346	47.23	18	3954	64.59	17	20392	43.87	--	--	--	--
SK1G00055591	89	cluster6:4243600-4251725	8126	41.48	7	3147	54.78	6	4979	33.08	--	--	--	--
SK1G00029855	88	cluster5:8139252-8153090	13839	46.69	5	4986	49.36	4	8853	45.19	--	--	--	--
SK1G00066718	88	cluster5:7267183-7275473	8291	43.26	6	5817	46.07	5	2474	36.66	1	100	5228	43.57
SK1G00069479	87	cluster10:10405626-10414732	9107	40.4	8	1582	48.29	7	7525	38.74	205	68.78	147	31.97
SK1G00065706	86	cluster9:26803381-26820376	16996	41.97	12	2234	47.9	11	14762	41.08	203	61.58	183	49.73
SK1G00069517	86	cluster10:11018245-11035309	17065	36.51	8	2738	52.15	7	14327	33.52	154	51.95	442	35.52
SK1G00069653	84	cluster10:13804701-13818366	13666	38.35	16	2799	52.27	15	10867	34.77	--	--	--	--
SK1G00055554	83	cluster6:3923160-3949430	26271	39.86	16	6705	49.87	15	19566	36.43	--	--	--	--
SK1G00056158	83	cluster6:9593827-9608298	14472	39.41	32	3511	45.06	31	10961	37.6	237	64.14	313	38.34
SK1G00043548	82	cluster1:40788571-40792828	4258	43.45	4	633	55.29	3	3625	41.38	--	--	--	--
SK1G00065311	82	cluster9:21389900-21398750	8851	42.65	9	3051	57.65	8	5800	34.76	--	--	--	--
SK1G00052132	81	cluster4:3805904-3813698	7795	45.12	2	4092	58.58	1	3703	30.25	--	--	--	--
SK1G00053003	81	cluster4:18925790-18931533	5744	39.08	4	2802	42.04	3	2942	36.27	--	--	--	--
SK1G00069664	81	cluster10:13933977-13937700	3724	49.97	5	789	62.86	4	2935	46.51	--	--	--	--
SK1G00066488	80	cluster5:4656991-4663219	6229	41.82	3	1347	65.78	2	4882	35.21	--	--	--	--
SK1G00052845	79	cluster4:16422487-16426824	4338	35.8	7	777	41.96	6	3561	34.46	--	--	--	--
SK1G00032704	76	cluster10:7359128-7363086	3959	41.25	5	666	60.81	4	3293	37.29	--	--	--	--
SK1G00050745	76	cluster3:28417764-28424347	6584	38.62	12	3288	43.4	11	3296	33.86	--	--	--	--
SK1G00033662	75	cluster10:20940005-20953714	13710	39.37	10	3432	55.27	9	10278	34.05	--	--	183	52.46
SK1G00069663	75	cluster10:13921752-13933609	11858	38.78	23	2838	44.15	22	9020	37.1	--	--	423	39.72
SK1G00065504	74	cluster9:24321677-24358373	36697	37.61	67	8957	44.99	66	27740	35.22	126	50	--	--
SK1G00068419	74	cluster5:32084981-32089544	4564	45.33	11	912	69.08	10	3652	39.4	--	--	--	--
SK1G00069402	74	cluster10:9038906-9048493	9588	45.38	9	5386	53.95	8	4202	34.39	--	--	223	40.36
SK1G00069827	74	cluster10:16614186-16617871	3686	43.6	9	2159	50.49	8	1527	33.86	--	--	320	42.19
SK1G00056146	73	cluster6:9436657-9444156	7500	39.04	12	2845	48.96	11	4655	32.98	171	69.59	379	44.06
SK1G00069385	73	cluster10:8740025-8742735	2711	47.58	3	2016	50.55	2	695	38.99	--	--	--	--
SK1G00069532	73	cluster10:11334938-11340767	5830	45.66	3	2385	55.93	2	3445	38.55	--	--	--	--
SK1G00073065	73	cluster12:4672330-4679528	7199	41.62	5	2336	46.4	4	4863	39.32	987	52.79	596	38.59
SK1G00062033	71	cluster8:10460559-10469703	9145	46.9	7	5151	50.94	6	3994	41.69	115	40	1898	41.25
SK1G00066786	71	cluster5:8029457-8052871	23415	40.23	8	6771	46.26	7	16644	37.77	--	--	--	--
SK1G00068060	71	cluster5:28874219-28884928	10710	44.29	5	4104	46.39	4	6606	42.98	--	--	--	--
SK1G00069379	71	cluster10:8681245-8687688	6444	40.39	4	1251	47.64	3	5193	38.65	58	53.45	248	33.47
SK1G00071229	71	cluster11:4395146-4419042	23897	41.67	15	8037	47.57	14	15860	38.68	--	--	--	--
SK1G00072636	71	cluster11:23057348-23079502	22155	45.11	4	1720	49.94	3	20435	44.71	1	100	1269	45.23
SK1G00065484	70	cluster9:24062448-24076393	13946	44.92	13	6165	44.22	12	7781	45.48	525	56.38	2955	42.91
SK1G00069443	70	cluster10:9560058-9565754	5697	35.63	3	1179	55.56	2	4518	30.43	--	--	--	--
SK1G00069705	70	cluster10:14593098-14604742	11645	41.43	7	978	58.79	6	10667	39.83	--	--	--	--
SK1G00043584	69	cluster1:41106382-41119971	13590	43.41	12	3684	70.41	11	9906	33.36	--	--	--	--
SK1G00066687	69	cluster5:6912430-6938625	26196	38.69	12	7905	45.48	11	18291	35.76	349	46.99	3369	44.94
SK1G00069501	69	cluster10:10745033-10760377	15345	40.89	13	2370	46.37	12	12975	39.89	76	59.21	236	42.8
SK1G00052873	68	cluster4:16925373-16944480	19108	39.24	12	2411	56.37	11	16697	36.77	124	53.23	--	--
SK1G00068521	68	cluster5:32806185-32817955	11771	43.34	5	8922	44.77	4	2849	38.89	2264	46.73	6259	42.96
SK1G00069490	68	cluster10:10565809-10569455	3647	41.07	5	801	52.81	4	2846	37.77	--	--	--	--
SK1G00069543	68	cluster10:11419190-11423207	4018	43.28	6	1338	47.83	5	2680	41.01	102	77.45	453	36.2
SK1G00050310	67	cluster3:21891021-21899906	8886	40.06	5	735	63.54	4	8151	37.95	--	--	--	--
SK1G00060867	67	cluster8:41234-51481	10248	48.51	12	2423	48.04	11	7825	48.65	208	52.88	373	39.95
SK1G00061448	67	cluster8:5088387-5103045	14659	41.59	17	3171	59.57	16	11488	36.62	--	--	--	--
SK1G00069645	67	cluster10:13666919-13674387	7469	39.75	8	3132	42.34	7	4337	37.88	1529	38.39	1339	44.66
SK1G00073470	67	cluster12:10852534-10855760	3227	47.1	2	2172	53.45	1	1055	34.03	--	--	--	--
SK1G00064555	66	cluster9:9063193-9066954	3762	41.33	5	750	55.47	4	3012	37.82	--	--	--	--
SK1G00065213	66	cluster9:20130628-20154434	23807	39.95	11	4560	50.55	10	19247	37.44	--	--	--	--
SK1G00065576	66	cluster9:25549873-25576636	26764	40.27	12	3363	51.03	11	23401	38.72	--	--	--	--
SK1G00069484	66	cluster10:10474101-10484941	10841	38.48	12	4337	43.74	11	6504	34.98	2116	49.81	1573	36.75
SK1G00069512	66	cluster10:10904123-10914465	10343	42.66	10	1410	47.23	9	8933	41.93	--	--	--	--
SK1G00041357	65	cluster1:16869056-16874058	5003	52.13	3	1905	66.14	2	3098	43.51	--	--	--	--
SK1G00052160	65	cluster4:4213493-4225795	12303	36.95	24	2544	45.99	23	9759	34.59	--	--	--	--
SK1G00064591	65	cluster9:9424837-9430577	5741	38.74	4	747	55.82	3	4994	36.18	--	--	--	--
SK1G00041896	64	cluster1:22419214-22422654	3441	41.47	5	1677	50.98	4	1764	32.43	--	--	--	--
SK1G00059518	64	cluster7:19161973-19169990	8018	48.1	5	5694	50.14	4	2324	43.12	--	--	--	--
SK1G00060505	64	cluster7:28051425-28057813	6389	42.34	11	1819	56.13	10	4570	36.85	136	69.12	--	--
SK1G00061460	64	cluster8:5191511-5203660	12150	45.09	5	2415	69.44	4	9735	39.04	--	--	--	--
SK1G00061483	64	cluster8:5390843-5405422	14580	45.05	19	6095	50.68	18	8485	41	--	--	--	--
SK1G00066792	64	cluster5:8134899-8138220	3322	42.56	5	1218	55.83	4	2104	34.89	--	--	--	--
SK1G00042275	63	cluster1:27901338-27913512	12175	35.38	4	2832	43.93	3	9343	32.78	--	--	--	--
SK1G00060385	63	cluster7:27142653-27167651	24999	45.61	15	8270	55.11	14	16729	40.91	--	--	--	--
SK1G00066764	63	cluster5:7710545-7731207	20663	42.06	16	5694	43.8	15	14969	41.39	--	--	--	--
SK1G00074767	63	cluster12:23742933-23764195	21263	39.05	49	7355	44.65	48	13908	36.09	123	59.35	191	33.51
SK1G00057794	62	cluster6:30178173-30185845	7673	43.1	10	3846	50.08	9	3827	36.09	241	53.94	401	38.9
SK1G00066935	62	cluster5:9889876-9903319	13444	37.96	4	2169	56.11	3	11275	34.47	--	--	--	--
SK1G00069564	62	cluster10:12057920-12063484	5565	39.6	6	702	43.02	5	4863	39.11	--	--	--	--
SK1G00074711	62	cluster12:23316282-23318969	2688	50.74	2	1749	52.49	1	939	47.5	--	--	--	--
SK1G00056182	61	cluster6:9841230-9854369	13140	46.81	11	2928	68.48	10	10212	40.6	--	--	--	--
SK1G00060257	61	cluster7:25947192-25949328	2137	42.91	8	1059	48.25	7	1078	37.66	115	55.65	299	36.45
SK1G00062089	61	cluster8:11079505-11085608	6104	38.3	9	1476	50.95	8	4628	34.27	--	--	--	--
SK1G00062799	61	cluster8:22638825-22652958	14134	40.26	12	1864	46.62	11	12270	39.29	422	60.66	275	37.45
SK1G00065697	61	cluster9:26719195-26728722	9528	42.42	14	1053	63.53	13	8475	39.8	--	--	--	--
SK1G00069469	61	cluster10:9963221-9973839	10619	33.73	4	2455	41.06	3	8164	31.53	1602	33.15	319	33.23
SK1G00069534	61	cluster10:11359721-11368174	8454	38.68	12	3009	45.1	11	5445	35.13	472	60.17	2285	42.1
SK1G00074531	61	cluster12:21956352-21971867	15516	43.45	26	5095	55.09	25	10421	37.76	84	76.19	1403	47.9
SK1G00046170	60	cluster2:23712348-23741659	29312	42.13	21	4552	53.32	20	24760	40.07	--	--	182	29.12
SK1G00041581	59	cluster1:19102972-19122353	19382	43.17	10	7176	42.98	9	12206	43.28	--	--	--	--
SK1G00043489	59	cluster1:40304968-40312410	7443	45.68	4	5280	47.41	3	2163	41.47	--	--	--	--
SK1G00050160	59	cluster3:19458672-19666084	207413	47.31	3	6733	40.62	2	200680	47.53	800	36.12	4175	40.6
SK1G00050819	59	cluster3:29239051-29242522	3472	47.58	10	2456	52.04	9	1016	36.81	40	37.5	154	27.92
SK1G00052663	59	cluster4:13741732-13747036	5305	43.39	7	1785	55.97	6	3520	37.02	--	--	--	--
SK1G00053033	59	cluster4:19272262-19291024	18763	40.78	3	2928	46.86	2	15835	39.65	1345	51.9	377	32.36
SK1G00065073	59	cluster9:18015049-18019896	4848	39.09	4	831	63.54	3	4017	34.03	--	--	--	--
SK1G00069335	59	cluster10:8002783-8010926	8144	44.7	5	2760	43.41	4	5384	45.36	--	--	--	--
SK1G00069456	59	cluster10:9784600-9793587	8988	37.96	8	1218	44.42	7	7770	36.95	--	--	--	--
SK1G00069661	59	cluster10:13891373-13898683	7311	47.63	20	3027	64.35	19	4284	35.81	--	--	--	--
SK1G00073507	59	cluster12:11340788-11346565	5778	40.78	4	621	62.48	3	5157	38.16	--	--	--	--
SK1G00046474	58	cluster2:26927671-26934573	6903	46.52	12	1833	62.96	11	5070	40.57	--	--	--	--
SK1G00052073	58	cluster4:2709357-2711464	2108	49.72	2	1977	49.97	1	131	45.8	--	--	--	--
SK1G00059437	58	cluster7:18297075-18300910	3836	41.19	13	1587	49.15	12	2249	35.57	--	--	--	--
SK1G00068071	58	cluster5:28974529-28992461	17933	46.75	7	2964	57.56	6	14969	44.61	--	--	--	--
SK1G00069383	58	cluster10:8732273-8736664	4392	40.69	5	657	52.36	4	3735	38.63	--	--	--	--
SK1G00073165	58	cluster12:6193918-6202491	8574	43.69	8	3270	46.76	7	5304	41.8	--	--	--	--
SK1G00043581	57	cluster1:41048617-41068802	20186	40.43	36	3288	51.03	35	16898	38.37	--	--	--	--
SK1G00053041	57	cluster4:19371621-19383394	11774	38.47	3	795	73.08	2	10979	35.96	--	--	--	--
SK1G00059274	57	cluster7:16335794-16343175	7382	40.68	10	3292	46.02	9	4090	36.38	1950	51.03	853	37.63
SK1G00060509	57	cluster7:28074983-28084921	9939	40.28	11	1214	55.44	10	8725	38.17	--	--	101	39.6
SK1G00064395	57	cluster9:7552554-7555901	3348	33.84	3	339	48.38	2	3009	32.2	--	--	--	--
SK1G00067267	57	cluster5:14923531-14927846	4316	45.13	5	1242	50.97	4	3074	42.78	--	--	222	43.24
SK1G00069545	57	cluster10:11467147-11472327	5181	39.9	4	2615	42.22	3	2566	37.53	--	--	2144	36.33
SK1G00043538	56	cluster1:40732007-40738180	6174	42.74	11	1796	50.67	10	4378	39.49	--	--	398	41.96
SK1G00052962	56	cluster4:18110144-18116898	6755	39.9	2	735	71.97	1	6020	35.98	--	--	--	--
SK1G00055259	56	cluster6:1629699-1651940	22242	38.96	29	4976	45.8	28	17266	36.99	--	--	456	32.89
SK1G00065084	56	cluster9:18332611-18342610	10000	43.86	13	2190	61	12	7810	39.05	--	--	--	--
SK1G00069584	56	cluster10:12433166-12433649	484	66.12	2	453	66.45	1	31	61.29	--	--	--	--
SK1G00042172	55	cluster1:26763562-26764946	1385	43.1	3	1231	43.95	2	154	36.36	61	49.18	--	--
SK1G00043226	55	cluster1:38095273-38115833	20561	41.32	16	4683	65.02	15	15878	34.33	--	--	--	--
SK1G00051946	55	cluster4:644905-679938	35034	46.2	5	6117	45.51	4	28917	46.34	424	54.72	4187	44.88
SK1G00055267	55	cluster6:1705508-1709037	3530	40.51	7	1227	50.04	6	2303	35.43	--	--	--	--
SK1G00064701	55	cluster9:10609296-10625589	16294	39.13	13	4712	42.72	12	11582	37.67	--	--	1235	41.94
SK1G00066719	55	cluster5:7281258-7288164	6907	38.7	22	2487	46.8	21	4420	34.14	--	--	--	--
SK1G00069539	55	cluster10:11385963-11387948	1986	50.5	5	876	65.41	4	1110	38.74	--	--	--	--
SK1G00019600	54	cluster7:26302440-26313923	11484	52.33	8	2151	65.6	7	9333	49.28	--	--	--	--
SK1G00052334	54	cluster4:6863979-6873491	9513	44.42	3	1303	45.97	2	8210	44.18	--	--	784	40.69
SK1G00065315	54	cluster9:21428028-21437544	9517	42.4	6	1306	55.13	5	8211	40.37	112	69.64	234	35.47
SK1G00073546	54	cluster12:11770992-11797424	26433	39.35	25	5162	43.63	24	21271	38.31	59	50.85	--	--
SK1G00073645	54	cluster12:12890558-12897084	6527	39.02	3	1390	67.63	2	5137	31.28	120	60	175	41.71
SK1G00041577	53	cluster1:19049754-19061602	11849	39.79	9	3273	54.75	8	8576	34.08	--	--	102	32.35
SK1G00053095	53	cluster4:19858436-19871054	12619	36.37	6	629	43.4	5	11990	36	29	41.38	--	--
SK1G00054594	53	cluster4:32696646-32698873	2228	41.56	3	1351	46.26	2	877	34.32	56	30.36	200	31
SK1G00062088	53	cluster8:11063188-11072278	9091	39.45	13	3670	46.27	12	5421	34.83	62	67.74	2489	45.92
SK1G00064748	53	cluster9:11356274-11362107	5834	43.85	10	3516	50.17	9	2318	34.25	322	48.76	299	35.45
SK1G00065612	53	cluster9:25892910-25908722	15813	42.98	10	3297	60.96	9	12516	38.24	--	--	--	--
SK1G00050820	52	cluster3:29252624-29267368	14745	43.46	19	4371	55.57	18	10374	38.36	--	--	--	--
SK1G00060126	52	cluster7:24850396-24856160	5765	40.09	9	3145	42.26	8	2620	37.48	--	--	2806	39.81
SK1G00061452	52	cluster8:5124947-5139073	14127	43.91	12	2480	63.27	11	11647	39.79	32	50	117	42.74
SK1G00066584	52	cluster5:5909580-5915420	5841	34.46	2	1014	44.18	1	4827	32.42	--	--	--	--
SK1G00067979	52	cluster5:27780136-27791577	11442	38.48	8	2397	52.57	7	9045	34.75	--	--	--	--
SK1G00068423	52	cluster5:32122600-32130526	7927	50.32	5	4842	55.1	4	3085	42.82	--	--	--	--
SK1G00069467	52	cluster10:9921016-9924972	3957	41.04	5	1848	47.94	4	2109	34.99	--	--	459	39.22
SK1G00069544	52	cluster10:11425234-11428847	3614	45.6	2	2708	47.78	1	906	39.07	1154	50.26	560	36.07
SK1G00074306	52	cluster12:19421081-19433446	12366	40.22	12	4812	45.12	11	7554	37.11	--	--	444	43.69
SK1G00041063	51	cluster1:14185484-14205331	19848	47.18	7	3040	57.17	6	16808	45.37	1	100	846	43.85
SK1G00053394	51	cluster4:22702086-22719898	17813	38.09	8	3051	59.62	7	14762	33.64	--	--	--	--
SK1G00054766	51	cluster4:34180215-34189718	9504	44.62	4	3936	47.05	3	5568	42.91	--	--	--	--
SK1G00056312	51	cluster6:11441002-11452120	11119	40.2	13	5572	45.48	12	5547	34.9	279	68.46	865	38.96
SK1G00069352	51	cluster10:8364732-8377221	12490	38.23	25	2604	46.7	24	9886	36	--	--	--	--
SK1G00069376	51	cluster10:8663347-8668503	5157	35.82	3	825	57.7	2	4332	31.65	--	--	--	--
SK1G00069658	51	cluster10:13873566-13875795	2230	58.25	4	1182	62.1	3	1048	53.91	--	--	--	--
SK1G00070178	51	cluster10:20771648-20775638	3991	41.44	6	1461	46.13	5	2530	38.74	--	--	--	--
SK1G00043232	50	cluster1:38160698-38170534	9837	50.69	11	4096	64.21	10	5741	41.04	97	64.95	2163	62.97
SK1G00060603	50	cluster7:28832298-28838766	6469	44.09	12	2155	48.26	11	4314	42	1230	52.03	586	41.98
SK1G00065510	50	cluster9:24447471-24451182	3712	44.42	4	1467	52.69	3	2245	39.02	--	--	--	--
SK1G00066741	50	cluster5:7461932-7475445	13514	38.2	3	4254	43.44	2	9260	35.8	--	--	3559	42.4
SK1G00069495	50	cluster10:10638824-10650643	11820	38.97	8	2115	52.1	7	9705	36.11	--	--	--	--
SK1G00069565	50	cluster10:12086503-12088617	2115	49.74	4	951	51.74	3	1164	48.11	--	--	474	39.03
SK1G00069637	50	cluster10:13439387-13441851	2465	54.69	3	2388	54.98	2	77	45.45	--	--	--	--
SK1G00069856	50	cluster10:17038458-17039240	783	68.2	1	783	68.2	--	--	--	--	--	--	--
SK1G00052134	49	cluster4:3819652-3827660	8009	38.28	4	3193	44.63	3	4816	34.07	--	--	85	30.59
SK1G00052144	49	cluster4:4061742-4066844	5103	48.07	2	4485	46.58	1	618	58.9	463	73.65	3719	43.02
SK1G00062100	49	cluster8:11267549-11270358	2810	43.74	4	2536	43.06	3	274	50	--	--	3014	36.26
SK1G00063506	49	cluster8:29888706-29893220	4515	41.93	2	312	48.4	1	4203	41.45	--	--	--	--
SK1G00069134	49	cluster10:5149794-5159173	9380	42.75	5	8367	43.47	4	1013	36.82	7496	43.54	64	51.56
SK1G00069580	49	cluster10:12335200-12340796	5597	37.34	5	648	60.65	4	4949	34.29	--	--	--	--
SK1G00069646	49	cluster10:13680069-13690820	10752	39	24	4683	45.48	23	6069	33.99	336	67.26	258	44.96
SK1G00070048	49	cluster10:19141127-19151801	10675	40.61	10	3240	51.73	9	7435	35.76	--	--	--	--
SK1G00070176	49	cluster10:20755266-20761158	5893	44.09	5	3128	49.74	4	2765	37.69	--	--	2423	47.75
SK1G00074398	49	cluster12:20907108-20912856	5749	42.51	11	2126	53.43	10	3623	36.1	--	--	206	35.92
SK1G00051062	48	cluster3:31917012-31927319	10308	40.04	6	5115	43.91	5	5193	36.22	--	--	--	--
SK1G00053058	48	cluster4:19594853-19599908	5056	42.17	18	2651	47.72	17	2405	36.05	177	53.67	293	38.91
SK1G00059508	48	cluster7:19029368-19033466	4099	39.52	2	435	52.18	1	3664	38.02	--	--	--	--
SK1G00060310	48	cluster7:26385783-26402551	16769	39.19	21	4335	53.4	20	12434	34.24	--	--	--	--
SK1G00063953	48	cluster9:3216854-3224896	8043	44.64	6	1350	60.15	5	6693	41.51	--	--	--	--
SK1G00065345	48	cluster9:21998460-21999661	1202	45.34	2	1047	46.8	1	155	35.48	--	--	--	--
SK1G00066597	48	cluster5:6049673-6057733	8061	41.12	13	3406	48.56	12	4655	35.68	263	71.86	284	39.79
SK1G00069395	48	cluster10:8987717-8990955	3239	46.93	5	2014	56.75	4	1225	30.78	12	25	205	33.17
SK1G00069609	48	cluster10:12774869-12781549	6681	60.92	7	5901	62.36	6	780	50	--	--	--	--
SK1G00069632	48	cluster10:13327892-13332274	4383	42.09	4	3993	42.32	3	390	39.74	2	0	3433	37.96
SK1G00069660	48	cluster10:13890552-13891004	453	68.87	1	453	68.87	--	--	--	--	--	--	--
SK1G00073503	48	cluster12:11309231-11321106	11876	43.2	4	5829	49.41	3	6047	37.21	--	--	--	--
SK1G00040357	47	cluster1:8547329-8570627	23299	45.08	6	4758	62.67	5	18541	40.57	--	--	--	--
SK1G00047084	47	cluster2:32199665-32201141	1477	44.35	2	417	71.46	1	1060	33.68	--	--	--	--
SK1G00052041	47	cluster4:1955264-1967459	12196	43.06	9	2694	53.79	8	9502	40.02	--	--	--	--
SK1G00056019	47	cluster6:7977676-7982571	4896	41.65	7	1969	45.61	6	2927	38.98	--	--	574	42.86
SK1G00058903	47	cluster7:9286949-9294918	7970	39.56	6	918	52.4	5	7052	37.89	--	--	--	--
SK1G00065666	47	cluster9:26409890-26427879	17990	36.32	17	3306	39.14	16	14684	35.69	--	--	--	--
SK1G00066813	47	cluster5:8451905-8475593	23689	48.18	4	3606	42.9	3	20083	49.13	251	47.41	1201	37.55
SK1G00067151	47	cluster5:12979279-12982679	3401	52.54	10	2715	54.18	9	686	46.06	--	--	--	--
SK1G00069296	47	cluster10:7436247-7436783	537	63.31	1	537	63.31	--	--	--	--	--	--	--
SK1G00069393	47	cluster10:8897888-8898040	153	37.25	1	153	37.25	--	--	--	--	--	--	--
SK1G00069411	47	cluster10:9103843-9104318	476	61.97	1	476	61.97	--	--	--	--	--	--	--
SK1G00069423	47	cluster10:9252304-9257379	5076	45.33	3	903	66.89	2	4173	40.67	--	--	--	--
SK1G00069485	47	cluster10:10512913-10515119	2207	43.59	2	2104	44.06	1	103	33.98	64	46.88	1512	39.81
SK1G00069557	47	cluster10:11910638-11911170	533	59.66	2	411	62.77	1	122	49.18	--	--	--	--
SK1G00073067	47	cluster12:4709420-4710595	1176	54.25	1	1176	54.25	--	--	--	--	--	--	--
SK1G00032743	46	cluster10:8021065-8027118	6054	35.35	5	1176	50.77	4	4878	31.63	--	--	--	--
SK1G00050705	46	cluster3:27910798-27920213	9416	37.46	3	3855	40.86	2	5561	35.1	--	--	--	--
SK1G00053060	46	cluster4:19605533-19609143	3611	39.99	4	594	59.43	3	3017	36.16	--	--	--	--
SK1G00053091	46	cluster4:19824518-19833044	8527	40.18	7	2779	45.66	6	5748	37.53	762	40.29	889	43.98
SK1G00060360	46	cluster7:26949914-26956050	6137	46.39	7	3048	45.21	6	3089	47.56	--	--	--	--
SK1G00062125	46	cluster8:11535841-11539945	4105	44.68	7	2064	52.13	6	2041	37.14	--	--	--	--
SK1G00063333	46	cluster8:28185609-28194548	8940	47.76	4	1526	56.16	3	7414	46.03	2	0	1032	56.2
SK1G00073851	46	cluster12:15458627-15460964	2338	49.96	7	1501	53.36	6	837	43.85	56	66.07	296	39.86
SK1G00032830	45	cluster10:9145156-9145701	546	68.13	2	537	68.53	1	9	44.44	--	--	--	--
SK1G00049895	45	cluster3:16305899-16310669	4771	36.28	6	3210	39.5	5	1561	29.66	--	--	--	--
SK1G00066526	45	cluster5:5090386-5096367	5982	38.15	11	4334	40.08	10	1648	33.07	2138	37.37	462	37.88
SK1G00067580	45	cluster5:22305007-22309473	4467	36.11	4	699	41.49	3	3768	35.11	--	--	--	--
SK1G00069282	45	cluster10:7089007-7089978	972	70.88	1	972	70.88	--	--	--	--	--	--	--
SK1G00069381	45	cluster10:8695670-8703614	7945	38.68	12	3515	46.17	11	4430	32.73	134	50	1758	41.98
SK1G00070030	45	cluster10:18898282-18903987	5706	43.66	3	765	64.58	2	4941	40.42	--	--	--	--
SK1G00074403	45	cluster12:20964816-20970743	5928	41.4	8	1197	54.3	7	4731	38.13	--	--	--	--
SK1G00058840	44	cluster7:8417940-8421639	3700	37.92	5	489	54.19	4	3211	35.44	--	--	--	--
SK1G00059482	44	cluster7:18740554-18747013	6460	39.29	16	1776	49.72	15	4684	35.33	--	--	--	--
SK1G00060380	44	cluster7:27117800-27119968	2169	42.74	6	927	50.59	5	1242	36.88	--	--	--	--
SK1G00060507	44	cluster7:28068009-28068761	753	71.31	1	753	71.31	--	--	--	--	--	--	--
SK1G00062907	44	cluster8:23969190-23976918	7729	38.44	13	2667	47.81	12	5062	33.5	42	52.38	474	41.98
SK1G00065313	44	cluster9:21414800-21418154	3355	41.22	2	476	57.14	1	2879	38.59	85	72.94	181	39.23
SK1G00065601	44	cluster9:25759376-25771782	12407	41.35	7	3381	49.69	6	9026	38.22	--	--	--	--
SK1G00067978	44	cluster5:27768519-27780113	11595	41.7	11	3912	48.03	10	7683	38.47	--	--	--	--
SK1G00069398	44	cluster10:9006776-9007258	483	70.39	1	483	70.39	--	--	--	--	--	--	--
SK1G00069525	44	cluster10:11240769-11250856	10088	42.43	9	2262	54.16	8	7826	39.04	--	--	--	--
SK1G00069585	44	cluster10:12457192-12459269	2078	46.25	2	1103	57.75	1	975	33.23	235	47.66	241	40.25
SK1G00069855	44	cluster10:17013106-17013864	759	73.12	1	759	73.12	--	--	--	--	--	--	--
SK1G00043580	43	cluster1:41041607-41047450	5844	39.6	5	987	49.85	4	4857	37.51	--	--	--	--
SK1G00047239	43	cluster2:33343010-33345404	2395	53.15	2	1506	60.36	1	889	40.94	--	--	--	--
SK1G00052139	43	cluster4:4023244-4033439	10196	38.67	3	2712	43.47	2	7484	36.93	--	--	--	--
SK1G00053081	43	cluster4:19749820-19759504	9685	39.14	16	2253	47.45	15	7432	36.63	--	--	--	--
SK1G00055411	43	cluster6:2777774-2795865	18092	49.77	10	7596	52.45	9	10496	47.83	--	--	--	--
SK1G00056161	43	cluster6:9621540-9629813	8274	47.2	3	5130	51.27	2	3144	40.55	4379	49.46	1	0
SK1G00058843	43	cluster7:8460699-8473414	12716	40.45	9	5025	41.73	8	7691	39.62	--	--	--	--
SK1G00062116	43	cluster8:11442446-11446967	4522	41.07	10	1570	47.01	9	2952	37.91	242	57.85	218	40.37
SK1G00065030	43	cluster9:16760543-16760767	225	59.11	1	225	59.11	--	--	--	--	--	--	--
SK1G00068269	43	cluster5:30756544-30761916	5373	47.33	2	696	71.26	1	4677	43.77	--	--	--	--
SK1G00069386	43	cluster10:8742791-8743521	731	50.75	4	276	61.59	3	455	44.18	--	--	--	--
SK1G00070036	43	cluster10:18943089-18947592	4504	39.32	8	1853	45.44	7	2651	35.04	382	54.97	768	33.85
SK1G00070246	43	cluster10:21467956-21477980	10025	38	10	1038	51.73	9	8987	36.42	--	--	--	--
SK1G00074532	43	cluster12:21972678-21974518	1841	48.02	3	1128	53.72	2	713	38.99	--	--	--	--
SK1G00045972	42	cluster2:21641245-21647576	6332	43.62	9	2004	51.3	8	4328	40.06	--	--	--	--
SK1G00052935	42	cluster4:17728335-17732557	4223	43.78	2	2415	47.54	1	1808	38.77	--	--	--	--
SK1G00053042	42	cluster4:19382620-19393708	11089	40.46	4	5594	44.55	3	5495	36.31	4720	39.36	121	54.55
SK1G00059277	42	cluster7:16370795-16379961	9167	48.16	3	2069	65.49	2	7098	43.11	93	53.76	140	35
SK1G00065647	42	cluster9:26202046-26206078	4033	50.38	3	1551	65.57	2	2482	40.89	--	--	--	--
SK1G00066523	42	cluster5:5077810-5078325	516	43.6	1	516	43.6	--	--	--	--	--	--	--
SK1G00066735	42	cluster5:7424985-7426229	1245	50.44	1	1245	50.44	--	--	--	--	--	--	--
SK1G00067556	42	cluster5:21888465-21894080	5616	39.26	4	1320	68.26	3	4296	30.35	--	--	--	--
SK1G00069435	42	cluster10:9422855-9430705	7851	40.4	10	1931	51.73	9	5920	36.71	73	58.9	268	45.15
SK1G00069657	42	cluster10:13859597-13863544	3948	32.35	3	234	50	2	3714	31.23	--	--	--	--
SK1G00070032	42	cluster10:18906715-18911183	4469	37.53	2	498	62.25	1	3971	34.42	--	--	--	--
SK1G00072093	42	cluster11:13958632-13962038	3407	42.06	4	2224	46.54	3	1183	33.64	381	65.35	1477	36.97
SK1G00074186	42	cluster12:18372536-18376372	3837	45.5	3	1728	57.7	2	2109	35.51	--	--	--	--
SK1G00032831	41	cluster10:9146244-9147440	1197	60.48	4	915	67.65	3	282	37.23	--	--	--	--
SK1G00043590	41	cluster1:41148022-41152476	4455	53.87	5	2613	66.36	4	1842	36.16	--	--	--	--
SK1G00049990	41	cluster3:17407650-17409924	2275	41.01	4	243	56.79	3	2032	39.12	--	--	--	--
SK1G00052071	41	cluster4:2677944-2680485	2542	44.41	3	1929	48.73	2	613	30.83	--	--	--	--
SK1G00052085	41	cluster4:3065081-3065683	603	49.92	1	603	49.92	--	--	--	--	--	--	--
SK1G00053079	41	cluster4:19727590-19732812	5223	41.2	3	4134	42.43	2	1089	36.55	--	--	--	--
SK1G00055623	41	cluster6:4493051-4511768	18718	43.9	22	5631	56.56	21	13087	38.46	--	--	--	--
SK1G00056005	41	cluster6:7854097-7856381	2285	44.77	7	1293	52.75	6	992	34.38	--	--	--	--
SK1G00060297	41	cluster7:26218793-26220065	1273	47.92	4	1029	50.63	3	244	36.48	--	--	--	--
SK1G00060564	41	cluster7:28497188-28552861	55674	45	4	1006	50.89	3	54668	44.89	--	--	571	40.46
SK1G00061169	41	cluster8:2750379-2752600	2222	44.69	5	861	58.54	4	1361	35.93	--	--	--	--
SK1G00061454	41	cluster8:5155155-5158645	3491	41.56	13	1305	50.96	12	2186	35.96	--	--	--	--
SK1G00063330	41	cluster8:28144365-28166714	22350	40.49	32	7998	45.52	31	14352	37.69	7208	45.91	346	38.44
SK1G00066512	41	cluster5:4918286-4922490	4205	36.77	7	915	54.54	6	3290	31.82	--	--	--	--
SK1G00067034	41	cluster5:11245710-11249914	4205	43.26	12	2076	49.33	11	2129	37.34	298	61.07	311	35.05
SK1G00069277	41	cluster10:7026162-7026640	479	65.97	2	318	66.67	1	161	64.6	--	--	--	--
SK1G00069363	41	cluster10:8471005-8478224	7220	45.01	9	1917	57.12	8	5303	40.64	--	--	--	--
SK1G00073077	41	cluster12:4870647-4882074	11428	48.16	8	1947	65.54	7	9481	44.59	--	--	--	--
SK1G00074375	41	cluster12:20004847-20006025	1179	63.19	4	1041	65.32	3	138	47.1	--	--	--	--
SK1G00043583	40	cluster1:41100311-41104239	3929	42.58	12	1852	50.32	11	2077	35.68	--	--	469	39.66
SK1G00046702	40	cluster2:28831439-28853402	21964	51.78	13	2402	48.33	12	19562	52.2	8	100	--	--
SK1G00052074	40	cluster4:2715354-2716215	862	63.34	2	819	64.84	1	43	34.88	--	--	--	--
SK1G00058842	40	cluster7:8439228-8448510	9283	38.12	6	564	55.14	5	8719	37.02	--	--	--	--
SK1G00061287	40	cluster8:3752627-3763924	11298	43.01	4	1083	65.47	3	10215	40.63	--	--	--	--
SK1G00063208	40	cluster8:27112836-27120154	7319	47.32	7	3264	57.97	6	4055	38.74	--	--	--	--
SK1G00064733	40	cluster9:11131204-11142526	11323	47.04	7	4032	45.68	6	7291	47.78	--	--	--	--
SK1G00066596	40	cluster5:6038520-6042446	3927	46.7	1	3927	46.7	--	--	--	--	--	--	--
SK1G00066797	40	cluster5:8206770-8208463	1694	55.9	2	1513	58.56	1	181	33.7	63	46.03	250	36.4
SK1G00066818	40	cluster5:8503994-8517519	13526	37.24	9	4057	43.41	8	9469	34.6	16	56.25	--	--
SK1G00069321	40	cluster10:7757211-7759236	2026	35.59	2	1206	36.73	1	820	33.9	--	--	--	--
SK1G00069511	40	cluster10:10900462-10902817	2356	43.25	6	1755	47.81	5	601	29.95	--	--	--	--
SK1G00071214	40	cluster11:4277511-4283034	5524	44.46	8	3064	52.87	7	2460	33.98	171	58.48	241	40.25
SK1G00073504	40	cluster12:11323771-11330730	6960	46.64	4	6640	45.99	3	320	60	3637	45.09	939	45.26
SK1G00074190	40	cluster12:18396092-18402587	6496	39.35	8	2397	43.85	7	4099	36.72	--	--	--	--
SK1G00021592	39	cluster6:11460329-11468054	7726	44.33	6	4251	48.91	5	3475	38.73	--	--	--	--
SK1G00038357	39	cluster12:21805953-21825847	19895	44.4	7	8739	54.67	6	11156	36.35	--	--	--	--
SK1G00041923	39	cluster1:22694883-22699668	4786	52.32	6	1944	71.66	5	2842	39.09	--	--	--	--
SK1G00045711	39	cluster2:17088507-17105725	17219	41.45	17	10957	44.34	16	6262	36.39	3468	45.88	--	--
SK1G00049994	39	cluster3:17437842-17445675	7834	49.41	20	2373	67	19	5461	41.77	--	--	--	--
SK1G00050713	39	cluster3:28057069-28064110	7042	40.85	11	3060	45.33	10	3982	37.42	230	68.26	1006	37.77
SK1G00053085	39	cluster4:19780638-19783282	2645	48.66	6	1958	52.2	5	687	38.57	--	--	269	32.34
SK1G00054533	39	cluster4:32226723-32231452	4730	42.37	4	3426	42.56	3	1304	41.87	--	--	--	--
SK1G00056247	39	cluster6:10599760-10607452	7693	41.73	10	5239	44.07	9	2454	36.72	693	50.51	2854	43.59
SK1G00056316	39	cluster6:11491042-11498365	7324	41.59	2	1914	61.6	1	5410	34.51	52	44.23	452	38.05
SK1G00064694	39	cluster9:10530496-10533479	2984	42.16	7	1262	50.24	6	1722	36.24	55	61.82	346	37.86
SK1G00066659	39	cluster5:6694709-6711455	16747	47.57	9	5787	59.29	8	10960	41.38	--	--	--	--
SK1G00067048	39	cluster5:11477272-11488170	10899	41.52	3	5103	44.15	2	5796	39.2	--	--	--	--
SK1G00068274	39	cluster5:30809093-30817548	8456	39.91	13	5286	42.87	12	3170	34.98	310	54.52	1140	34.74
SK1G00069279	39	cluster10:7048246-7049434	1189	44.07	2	237	54.85	1	952	41.39	--	--	--	--
SK1G00069320	39	cluster10:7754551-7757193	2643	37.34	5	2373	38.64	4	270	25.93	--	--	--	--
SK1G00069424	39	cluster10:9264742-9274040	9299	48.9	2	3351	61.41	1	5948	41.85	--	--	--	--
SK1G00069442	39	cluster10:9552730-9553743	1014	53.65	2	927	54.69	1	87	42.53	--	--	--	--
SK1G00070185	39	cluster10:20819309-20822980	3672	40.99	11	2413	45.54	10	1259	32.25	15	60	379	34.3
SK1G00070186	39	cluster10:20822812-20829723	6912	38.7	18	3515	44.07	17	3397	33.15	192	67.19	476	36.55
SK1G00070354	39	cluster10:22649278-22664739	15462	48.89	5	4869	69.52	4	10593	39.41	--	--	--	--
SK1G00070758	39	cluster11:328850-331779	2930	47.37	7	2472	48.95	6	458	38.86	--	--	--	--
SK1G00074401	39	cluster12:20935414-20943674	8261	40.89	20	4032	46.4	19	4229	35.63	372	69.35	1068	44.66
SK1G00041594	38	cluster1:19227441-19237972	10532	48.73	10	1464	46.11	9	9068	49.15	255	63.92	123	31.71
SK1G00043044	38	cluster1:36288025-36294775	6751	38.07	12	3245	43.33	11	3506	33.2	--	--	263	34.22
SK1G00044858	38	cluster2:7932537-7953953	21417	37.56	34	3518	44.06	33	17899	36.29	104	72.12	411	37.47
SK1G00049991	38	cluster3:17410370-17410600	231	61.9	1	231	61.9	--	--	--	--	--	--	--
SK1G00052072	38	cluster4:2689964-2694069	4106	43.33	3	1941	53.58	2	2165	34.13	--	--	--	--
SK1G00056155	38	cluster6:9541480-9549128	7649	42.23	10	2672	57.34	9	4977	34.12	189	52.91	542	32.47
SK1G00058858	38	cluster7:8725107-8739703	14597	39.25	14	2136	51.08	13	12461	37.23	--	--	--	--
SK1G00058898	38	cluster7:9232396-9234732	2337	46.13	6	1677	49.14	5	660	38.48	--	--	--	--
SK1G00064736	38	cluster9:11183636-11192880	9245	43.43	9	1152	54.95	8	8093	41.79	--	--	--	--
SK1G00064925	38	cluster9:14936504-14943285	6782	40.31	7	3087	46.13	6	3695	35.45	--	--	--	--
SK1G00065483	38	cluster9:24051204-24055415	4212	40.65	4	2685	45.77	3	1527	31.63	--	--	--	--
SK1G00067025	38	cluster5:11171594-11178254	6661	37.56	7	870	55.98	6	5791	34.8	--	--	--	--
SK1G00069294	38	cluster10:7347053-7348469	1417	40.37	5	945	47.62	4	472	25.85	--	--	--	--
SK1G00069409	38	cluster10:9093115-9095972	2858	42.86	5	1953	47.98	4	905	31.82	--	--	--	--
SK1G00069417	38	cluster10:9161827-9162480	654	74.16	1	654	74.16	--	--	--	--	--	--	--
SK1G00069458	38	cluster10:9804846-9806749	1904	56.88	2	1260	69.29	1	644	32.61	--	--	--	--
SK1G00069463	38	cluster10:9841480-9853951	12472	39.46	5	6331	43.18	4	6141	35.61	--	--	625	43.36
SK1G00071049	38	cluster11:2843957-2869896	25940	38.6	31	3262	54.17	30	22678	36.36	--	--	--	--
SK1G00074525	38	cluster12:21911261-21916448	5188	40.82	11	1449	47.14	10	3739	38.38	--	--	--	--
SK1G00074534	38	cluster12:21976974-21982467	5494	40.15	15	2359	47.1	14	3135	34.93	110	76.36	482	40.87
SK1G00039435	37	cluster1:963444-966085	2642	51.55	6	1720	60.7	5	922	34.49	88	42.05	--	--
SK1G00043043	37	cluster1:36283814-36287286	3473	43.36	7	1858	50.81	6	1615	34.8	46	69.57	249	39.76
SK1G00043715	37	cluster1:42162951-42166478	3528	45.07	7	1326	54.68	6	2202	39.28	--	--	--	--
SK1G00052921	37	cluster4:17585316-17592571	7256	40.9	7	3783	46.13	6	3473	35.21	--	--	--	--
SK1G00052923	37	cluster4:17603933-17612986	9054	39.67	8	2487	51.31	7	6567	35.27	379	59.63	1626	43.36
SK1G00053030	37	cluster4:19251036-19262677	11642	40.68	7	5209	47.3	6	6433	35.32	--	--	3527	43.21
SK1G00053083	37	cluster4:19767510-19772407	4898	43.77	6	4020	43.73	5	878	43.96	152	39.47	3493	42.2
SK1G00055895	37	cluster6:6875491-6885169	9679	36.61	8	2094	42.07	7	7585	35.1	--	--	--	--
SK1G00055987	37	cluster6:7638665-7651974	13310	45.73	5	4276	67.47	4	9034	35.43	52	55.77	186	36.56
SK1G00056008	37	cluster6:7863923-7868322	4400	44.02	6	1794	51.06	5	2606	39.18	--	--	--	--
SK1G00056125	37	cluster6:9102485-9105362	2878	37.35	6	2247	38.5	5	631	33.28	--	--	--	--
SK1G00056809	37	cluster6:19825676-19829394	3719	42.73	4	1854	40.35	3	1865	45.09	--	--	--	--
SK1G00059248	37	cluster7:15686882-15687853	972	70.58	1	972	70.58	--	--	--	--	--	--	--
SK1G00065208	37	cluster9:20055166-20057952	2787	46.86	1	2787	46.86	--	--	--	--	--	--	--
SK1G00066532	37	cluster5:5205277-5210743	5467	37.46	7	1305	43.22	6	4162	35.66	166	46.99	392	37.76
SK1G00066636	37	cluster5:6556032-6562362	6331	41.83	4	1392	62.93	3	4939	35.88	--	--	--	--
SK1G00067044	37	cluster5:11374269-11398225	23957	37.97	24	7140	45.77	23	16817	34.66	--	--	--	--
SK1G00067266	37	cluster5:14911889-14923349	11461	40.7	7	2087	51.08	6	9374	38.39	--	--	237	42.62
SK1G00069391	37	cluster10:8876997-8879633	2637	44.9	4	945	59.79	3	1692	36.58	--	--	--	--
SK1G00069468	37	cluster10:9925218-9932801	7584	41.92	3	2527	45.55	2	5057	40.1	248	70.16	335	34.63
SK1G00069496	37	cluster10:10652120-10659217	7098	39.9	13	2532	47.87	12	4566	35.48	375	66.93	453	41.28
SK1G00069536	37	cluster10:11371469-11374454	2986	50.7	3	2514	54.42	2	472	30.93	--	--	--	--
SK1G00069548	37	cluster10:11493861-11499280	5420	37.29	6	1254	46.81	5	4166	34.42	--	--	--	--
SK1G00069644	37	cluster10:13624638-13624781	144	34.03	1	144	34.03	--	--	--	--	--	--	--
SK1G00069857	37	cluster10:17044163-17044891	729	70.37	1	729	70.37	--	--	--	--	--	--	--
SK1G00074191	37	cluster12:18404168-18404311	144	65.97	1	144	65.97	--	--	--	--	--	--	--
SK1G00032963	36	cluster10:11369891-11370136	246	65.85	1	246	65.85	--	--	--	--	--	--	--
SK1G00044834	36	cluster2:7761505-7761831	327	62.39	1	327	62.39	--	--	--	--	--	--	--
SK1G00044925	36	cluster2:8561373-8571421	10049	41.48	18	3462	45.75	17	6587	39.23	--	--	--	--
SK1G00052391	36	cluster4:7604698-7605848	1151	57.25	2	546	60.07	1	605	54.71	--	--	--	--
SK1G00053343	36	cluster4:22206748-22212587	5840	38.08	7	1340	50.9	6	4500	34.27	66	68.18	200	37.5
SK1G00054580	36	cluster4:32590254-32597736	7483	39.74	20	2044	46.53	19	5439	37.19	152	54.61	341	46.33
SK1G00057198	36	cluster6:24567644-24575002	7359	31.89	14	3393	36.6	13	3966	27.86	--	--	--	--
SK1G00059269	36	cluster7:16259105-16264931	5827	41.2	8	2150	48.09	7	3677	37.18	327	65.44	446	38.34
SK1G00060508	36	cluster7:28071118-28071765	648	72.84	1	648	72.84	--	--	--	--	--	--	--
SK1G00065312	36	cluster9:21403175-21411903	8729	40.45	5	5592	42.67	4	3137	36.5	167	43.71	4246	36.43
SK1G00066207	36	cluster5:1380834-1384770	3937	41.68	7	1269	50.04	6	2668	37.71	--	--	--	--
SK1G00066655	36	cluster5:6662587-6669482	6896	39.53	15	2125	49.51	14	4771	35.09	--	--	553	44.48
SK1G00066658	36	cluster5:6684950-6690178	5229	48.79	3	2574	55.52	2	2655	42.26	--	--	--	--
SK1G00067054	36	cluster5:11543042-11550963	7922	41.68	6	1696	54.54	5	6226	38.18	4	75	--	--
SK1G00067963	36	cluster5:27655427-27661000	5574	52.89	6	2904	68.84	5	2670	35.54	--	--	--	--
SK1G00067967	36	cluster5:27697624-27701348	3725	43.79	11	1874	50.32	10	1851	37.17	44	54.55	291	47.77
SK1G00068325	36	cluster5:31289412-31296966	7555	42.3	2	885	67.01	1	6670	39.03	--	--	--	--
SK1G00069220	36	cluster10:6214761-6220135	5375	38.29	11	1762	47.96	10	3613	33.57	58	63.79	267	40.07
SK1G00069482	36	cluster10:10445004-10445363	360	39.17	1	360	39.17	--	--	--	--	--	--	--
SK1G00069492	36	cluster10:10575461-10600819	25359	42.42	27	6138	44.56	26	19221	41.74	--	--	--	--
SK1G00070168	36	cluster10:20585628-20606917	21290	41.45	12	5493	52.38	11	15797	37.65	--	--	--	--
SK1G00070269	36	cluster10:21694408-21699363	4956	37.51	5	1014	54.24	4	3942	33.21	--	--	--	--
SK1G00073276	36	cluster12:8045907-8050145	4239	45.95	3	1383	47.36	2	2856	45.27	--	--	--	--
SK1G00073540	36	cluster12:11654652-11666988	12337	36.2	12	2968	48.75	11	9369	32.22	190	43.16	222	42.79
SK1G00074295	36	cluster12:19351168-19357031	5864	41.61	5	3040	45.79	4	2824	37.11	--	--	301	41.86
SK1G00074300	36	cluster12:19381229-19385970	4742	51.54	5	1311	68.19	4	3431	45.18	--	--	--	--
SK1G00074520	36	cluster12:21893177-21897095	3919	42.97	10	1922	48.8	9	1997	37.36	395	66.33	192	35.94
SK1G00074528	36	cluster12:21931530-21940025	8496	40.22	9	2339	44.72	8	6157	38.51	--	--	730	39.45
SK1G00074530	36	cluster12:21946063-21951405	5343	41.33	10	1338	47.16	9	4005	39.38	--	--	--	--
SK1G00074535	36	cluster12:21983964-21986417	2454	47.03	8	1128	56.12	7	1326	39.29	--	--	--	--
SK1G00030140	35	cluster5:11214633-11224298	9666	35.7	15	2543	41.88	14	7123	33.5	68	42.65	--	--
SK1G00042259	35	cluster1:27729563-27735540	5978	61.58	5	5448	61.18	4	530	65.66	--	--	--	--
SK1G00050747	35	cluster3:28455199-28455462	264	43.94	1	264	43.94	--	--	--	--	--	--	--
SK1G00052301	35	cluster4:6389454-6393241	3788	38.81	8	1182	44.92	7	2606	36.03	--	--	--	--
SK1G00052762	35	cluster4:15238166-15240060	1895	48.18	5	1578	49.49	4	317	41.64	--	--	--	--
SK1G00054597	35	cluster4:32703483-32708160	4678	48.55	5	1128	66.49	4	3550	42.85	--	--	--	--
SK1G00055176	35	cluster6:1020339-1020935	597	67	1	597	67	--	--	--	--	--	--	--
SK1G00055182	35	cluster6:1053333-1055753	2421	66.25	1	2421	66.25	--	--	--	--	--	--	--
SK1G00056292	35	cluster6:11214639-11223898	9260	41.06	5	1029	58.21	4	8231	38.91	--	--	--	--
SK1G00057524	35	cluster6:27866380-27874042	7663	54.98	8	2088	63.12	7	5575	51.93	--	--	--	--
SK1G00059272	35	cluster7:16286669-16299611	12943	41.17	7	1335	45.17	6	11608	40.7	69	44.93	282	32.98
SK1G00059441	35	cluster7:18361995-18367011	5017	38.65	12	1572	53.94	11	3445	31.67	--	--	--	--
SK1G00059620	35	cluster7:20288580-20306586	18007	39.99	23	2641	51.31	22	15366	38.05	94	65.96	--	--
SK1G00060787	35	cluster7:30130711-30137621	6911	35.26	6	885	53.67	5	6026	32.56	--	--	--	--
SK1G00065613	35	cluster9:25924837-25935780	10944	42.8	9	2667	57.26	8	8277	38.14	--	--	--	--
SK1G00065676	35	cluster9:26512840-26519380	6541	40.96	4	3351	46.37	3	3190	35.27	--	--	--	--
SK1G00066734	35	cluster5:7419088-7424660	5573	45.07	3	1902	56.52	2	3671	39.14	65	53.85	358	38.83
SK1G00067717	35	cluster5:24581154-24594056	12903	41.66	5	1629	68.57	4	11274	37.77	--	--	--	--
SK1G00068658	35	cluster10:949237-964049	14813	38.17	23	3785	47.5	22	11028	34.97	--	--	1835	39.95
SK1G00069299	35	cluster10:7534181-7537159	2979	36.86	2	192	63.02	1	2787	35.06	--	--	--	--
SK1G00069305	35	cluster10:7595019-7596656	1638	46.09	2	1401	47.97	1	237	35.02	--	--	--	--
SK1G00069434	35	cluster10:9408377-9409568	1192	39.68	2	342	53.8	1	850	34	--	--	--	--
SK1G00069448	35	cluster10:9653254-9654220	967	67.53	2	264	68.94	1	703	67	--	--	--	--
SK1G00069508	35	cluster10:10837737-10843781	6045	46.39	19	1413	62.99	18	4632	41.32	--	--	--	--
SK1G00070024	35	cluster10:18819568-18822578	3011	41.88	2	777	62.93	1	2234	34.56	--	--	--	--
SK1G00072719	35	cluster11:24144148-24185659	41512	41.56	30	9623	48.17	29	31889	39.57	--	--	1671	44.05
SK1G00073337	35	cluster12:9019666-9022185	2520	37.42	3	1092	46.7	2	1428	30.32	--	--	--	--
SK1G00073338	35	cluster12:9026283-9037097	10815	52.36	11	3315	65.97	10	7500	46.35	--	--	--	--
SK1G00073358	35	cluster12:9253777-9256817	3041	38.47	3	1581	41.24	2	1460	35.48	--	--	--	--
SK1G00073524	35	cluster12:11459445-11477947	18503	38.17	40	5426	46.68	39	13077	34.64	125	61.6	--	--
SK1G00073643	35	cluster12:12875085-12882091	7007	35.25	3	765	68.1	2	6242	31.22	--	--	--	--
SK1G00032946	34	cluster10:11186463-11196022	9560	32.94	7	1008	44.84	6	8552	31.54	--	--	--	--
SK1G00041308	34	cluster1:16360861-16404758	43898	44.07	5	1812	48.57	4	42086	43.88	620	64.84	841	37.69
SK1G00042247	34	cluster1:27602477-27610236	7760	50.91	8	1896	64.35	7	5864	46.57	--	--	--	--
SK1G00042807	34	cluster1:34329831-34336215	6385	39.53	12	2634	42.82	11	3751	37.22	--	--	--	--
SK1G00045818	34	cluster2:19315963-19321517	5555	43.17	5	2062	51.21	4	3493	38.42	768	59.24	919	43.31
SK1G00049992	34	cluster3:17410632-17411331	700	39.57	4	264	45.83	3	436	35.78	--	--	--	--
SK1G00051358	34	cluster3:34602267-34615509	13243	41.18	4	6486	45.5	3	6757	37.04	--	--	--	--
SK1G00052190	34	cluster4:4655218-4663834	8617	38.77	14	2329	51.57	13	6288	34.03	845	70.3	1148	40.16
SK1G00052927	34	cluster4:17641643-17647230	5588	36.26	5	1029	43.83	4	4559	34.55	--	--	--	--
SK1G00053061	34	cluster4:19610383-19613937	3555	53.76	4	1770	69.72	3	1785	37.93	--	--	--	--
SK1G00056315	34	cluster6:11469862-11472276	2415	40.66	1	2415	40.66	--	--	--	--	--	--	--
SK1G00058911	34	cluster7:9388329-9397051	8723	45.02	6	2661	66.44	5	6062	35.62	--	--	--	--
SK1G00060506	34	cluster7:28061454-28063348	1895	42.85	4	1020	52.16	3	875	32	--	--	--	--
SK1G00060605	34	cluster7:28848248-28852514	4267	44.67	5	2466	49.27	4	1801	38.37	481	65.9	1304	41.41
SK1G00061545	34	cluster8:5862256-5871843	9588	43.18	10	2648	60.5	9	6940	36.57	--	--	245	39.18
SK1G00066670	34	cluster5:6792721-6798306	5586	39.53	6	4188	41.19	5	1398	34.55	--	--	225	29.33
SK1G00066934	34	cluster5:9879173-9889815	10643	40.16	3	2031	54.8	2	8612	36.7	--	--	--	--
SK1G00067969	34	cluster5:27719985-27726312	6328	41.39	10	2374	48.1	9	3954	37.35	248	58.47	359	37.6
SK1G00069533	34	cluster10:11344829-11346208	1380	61.67	1	1380	61.67	--	--	--	--	--	--	--
SK1G00069535	34	cluster10:11369543-11369845	303	66.67	1	303	66.67	--	--	--	--	--	--	--
SK1G00069592	34	cluster10:12514985-12517656	2672	40.27	6	1425	43.79	5	1247	36.25	--	--	--	--
SK1G00070038	34	cluster10:18958796-18962096	3301	48.05	2	1437	56.09	1	1864	41.85	--	--	--	--
SK1G00073196	34	cluster12:6737574-6738937	1364	57.04	2	996	68.27	1	368	26.63	--	--	--	--
SK1G00073596	34	cluster12:12334377-12361188	26812	41.65	17	11004	44.37	16	15808	39.75	--	--	--	--
SK1G00073783	34	cluster12:14769859-14771078	1220	57.79	2	1129	58.9	1	91	43.96	2	100	722	54.16
SK1G00074385	34	cluster12:20659790-20660389	600	67.5	1	600	67.5	--	--	--	--	--	--	--
SK1G00074526	34	cluster12:21917031-21924022	6992	42.68	11	4126	46.97	10	2866	36.5	243	72.02	286	40.21
SK1G00027338	33	cluster9:8340823-8348495	7673	54.79	24	2937	71.6	23	4736	44.36	--	--	--	--
SK1G00028491	33	cluster9:25475795-25484445	8651	39.83	7	660	68.79	6	7991	37.44	--	--	--	--
SK1G00037840	33	cluster12:16971838-16972182	345	62.32	1	345	62.32	--	--	--	--	--	--	--

## Sheet: LMG
Gene ID	Variant number	Loci	Length(bp)	GC(%)	Exon number	Exon length(bp)	Exon GC(%)	Intron number	Intron length(bp)	Intron GC(%)	5'UTR length(bp)	5'UTR GC(%)	3'UTR length(bp)	3'UTR GC(%)
SK1G00071071	1	cluster11:3084892-3084990	99	48.48	1	99	48.48	--	--	--	--	--	--	--
SK1G00071917	1	cluster11:11545820-11545924	105	60.95	1	105	60.95	--	--	--	--	--	--	--
SK1G00073583	1	cluster12:12218824-12218955	132	40.91	1	132	40.91	--	--	--	--	--	--	--
SK1G00071102	1	cluster11:3393490-3393627	138	43.48	1	138	43.48	--	--	--	--	--	--	--
SK1G00071442	1	cluster11:6381910-6382050	141	51.77	1	141	51.77	--	--	--	--	--	--	--
SK1G00072848	1	cluster12:824752-824892	141	41.84	1	141	41.84	--	--	--	--	--	--	--
SK1G00070315	1	cluster10:22120757-22120900	144	38.89	1	144	38.89	--	--	--	--	--	--	--
SK1G00074049	1	cluster12:17375062-17375208	147	33.33	1	147	33.33	--	--	--	--	--	--	--
SK1G00072981	1	cluster12:3243670-3243819	150	55.33	1	150	55.33	--	--	--	--	--	--	--
SK1G00070240	1	cluster10:21434968-21435129	162	40.12	1	162	40.12	--	--	--	--	--	--	--
SK1G00070233	1	cluster10:21360973-21361140	168	19.64	1	168	19.64	--	--	--	--	--	--	--
SK1G00072743	1	cluster11:24510632-24510805	174	24.71	1	174	24.71	--	--	--	--	--	--	--
SK1G00074089	1	cluster12:17730281-17730463	183	36.07	1	183	36.07	--	--	--	--	--	--	--
SK1G00072969	1	cluster12:3113712-3113897	186	39.25	1	186	39.25	--	--	--	--	--	--	--
SK1G00073717	1	cluster12:14118129-14118314	186	33.33	1	186	33.33	--	--	--	--	--	--	--
SK1G00071253	1	cluster11:4584658-4584849	192	60.94	1	192	60.94	--	--	--	--	--	--	--
SK1G00072998	1	cluster12:3553644-3553835	192	51.04	1	192	51.04	--	--	--	--	--	--	--
SK1G00074653	1	cluster12:22832232-22832423	192	61.98	1	192	61.98	--	--	--	--	--	--	--
SK1G00070305	1	cluster10:21993265-21993459	195	26.15	1	195	26.15	--	--	--	--	--	--	--
SK1G00070316	1	cluster10:22128605-22128799	195	48.72	1	195	48.72	--	--	--	--	--	--	--
SK1G00071403	1	cluster11:5884832-5885026	195	34.87	1	195	34.87	--	--	--	--	--	--	--
SK1G00074154	1	cluster12:18199088-18199285	198	40.4	1	198	40.4	--	--	--	--	--	--	--
SK1G00074182	1	cluster12:18339503-18339700	198	68.18	1	198	68.18	--	--	--	--	--	--	--
SK1G00070549	1	cluster10:24477838-24478038	201	30.35	1	201	30.35	--	--	--	--	--	--	--
SK1G00074425	1	cluster12:21160862-21161062	201	42.79	1	201	42.79	--	--	--	--	--	--	--
SK1G00073180	1	cluster12:6566007-6566210	204	30.39	1	204	30.39	--	--	--	--	--	--	--
SK1G00071167	1	cluster11:3976912-3977121	210	55.24	1	210	55.24	--	--	--	--	--	--	--
SK1G00070700	1	cluster10:25776963-25777178	216	56.02	2	189	57.14	1	27	48.15	--	--	--	--
SK1G00072874	1	cluster12:1353188-1353406	219	71.23	1	219	71.23	--	--	--	--	--	--	--
SK1G00073160	1	cluster12:6044417-6044638	222	32.43	1	222	32.43	--	--	--	--	--	--	--
SK1G00074578	1	cluster12:22265675-22265899	225	64.44	1	225	64.44	--	--	--	--	--	--	--
SK1G00073555	1	cluster12:11876701-11876928	228	45.18	1	228	45.18	--	--	--	--	--	--	--
SK1G00071105	1	cluster11:3416886-3417116	231	69.7	1	231	69.7	--	--	--	--	--	--	--
SK1G00073057	1	cluster12:4593851-4594084	234	65.38	1	234	65.38	--	--	--	--	--	--	--
SK1G00074196	1	cluster12:18471654-18471888	235	35.74	1	235	35.74	--	--	--	--	--	--	--
SK1G00071959	1	cluster11:12106423-12106659	237	67.09	1	237	67.09	--	--	--	--	--	--	--
SK1G00071013	1	cluster11:2599196-2599441	246	63.82	1	246	63.82	--	--	--	--	--	--	--
SK1G00073993	1	cluster12:16751145-16751393	249	72.29	1	249	72.29	--	--	--	--	--	--	--
SK1G00072838	1	cluster12:619910-620161	252	65.87	1	252	65.87	--	--	--	--	--	--	--
SK1G00072911	1	cluster12:1915368-1915625	258	67.83	1	258	67.83	--	--	--	--	--	--	--
SK1G00072155	1	cluster11:15325674-15325934	261	54.79	1	261	54.79	--	--	--	--	--	--	--
SK1G00073872	1	cluster12:15586881-15587147	267	40.82	1	267	40.82	--	--	--	--	--	--	--
SK1G00071483	1	cluster11:6742299-6742569	271	62.36	2	228	65.79	1	43	44.19	--	--	--	--
SK1G00073068	1	cluster12:4743903-4744178	276	72.1	1	276	72.1	--	--	--	--	--	--	--
SK1G00074687	1	cluster12:23155474-23155749	276	49.28	1	276	49.28	--	--	--	--	--	--	--
SK1G00072952	1	cluster12:2957499-2957780	282	48.94	1	282	48.94	--	--	--	--	--	--	--
SK1G00074446	1	cluster12:21302865-21303149	285	42.11	1	285	42.11	--	--	--	--	--	--	--
SK1G00073807	1	cluster12:14954211-14954498	288	27.43	1	288	27.43	--	--	--	--	--	--	--
SK1G00071315	1	cluster11:4986389-4986679	291	74.23	1	291	74.23	--	--	--	--	--	--	--
SK1G00073097	1	cluster12:5130709-5130999	291	69.07	1	291	69.07	--	--	--	--	--	--	--
SK1G00073789	1	cluster12:14804300-14804596	297	67.34	1	297	67.34	--	--	--	--	--	--	--
SK1G00072965	1	cluster12:3099139-3099438	300	40	1	300	40	--	--	--	--	--	--	--
SK1G00073055	1	cluster12:4584700-4585011	312	33.01	1	312	33.01	--	--	--	--	--	--	--
SK1G00073399	1	cluster12:9720232-9720546	315	51.11	1	315	51.11	--	--	--	--	--	--	--
SK1G00071063	1	cluster11:3015211-3015528	318	62.26	1	318	62.26	--	--	--	--	--	--	--
SK1G00071493	1	cluster11:6807779-6808096	318	75.16	1	318	75.16	--	--	--	--	--	--	--
SK1G00073285	1	cluster12:8211049-8211366	318	72.33	1	318	72.33	--	--	--	--	--	--	--
SK1G00073825	1	cluster12:15174685-15175023	339	44.54	2	309	46.93	1	30	20	--	--	--	--
SK1G00070953	1	cluster11:2080058-2080399	342	69.59	1	342	69.59	--	--	--	--	--	--	--
SK1G00073716	1	cluster12:14117640-14117981	342	72.51	1	342	72.51	--	--	--	--	--	--	--
SK1G00074427	1	cluster12:21166354-21166701	348	75.57	1	348	75.57	--	--	--	--	--	--	--
SK1G00071014	1	cluster11:2605164-2605515	352	70.17	2	324	70.99	1	28	60.71	--	--	--	--
SK1G00073735	1	cluster12:14266439-14266800	362	66.02	2	252	73.02	1	110	50	--	--	--	--
SK1G00072877	1	cluster12:1378280-1378645	366	67.21	1	366	67.21	--	--	--	--	--	--	--
SK1G00073147	1	cluster12:5888648-5889019	372	39.78	1	372	39.78	--	--	--	--	--	--	--
SK1G00070338	1	cluster10:22446609-22446989	381	69.55	1	381	69.55	--	--	--	--	--	--	--
SK1G00070823	1	cluster11:1107242-1107637	396	64.65	1	396	64.65	--	--	--	--	--	--	--
SK1G00073584	1	cluster12:12224927-12225361	435	64.37	1	435	64.37	--	--	--	--	--	--	--
SK1G00074756	1	cluster12:23661156-23661590	435	76.55	1	435	76.55	--	--	--	--	--	--	--
SK1G00070661	1	cluster10:25495532-25495975	444	67.79	1	444	67.79	--	--	--	--	--	--	--
SK1G00072901	1	cluster12:1795079-1795522	444	44.37	1	444	44.37	--	--	--	--	--	--	--
SK1G00073113	1	cluster12:5311444-5311893	450	63.56	1	450	63.56	--	--	--	--	--	--	--
SK1G00073822	1	cluster12:15110382-15110831	450	69.33	1	450	69.33	--	--	--	--	--	--	--
SK1G00073826	1	cluster12:15184023-15184478	456	69.96	1	456	69.96	--	--	--	--	--	--	--
SK1G00073315	1	cluster12:8670294-8670750	457	46.39	2	318	47.8	1	139	43.17	--	--	--	--
SK1G00074209	1	cluster12:18617822-18618280	459	61.87	1	459	61.87	--	--	--	--	--	--	--
SK1G00071318	1	cluster11:5005396-5005878	483	80.12	1	483	80.12	--	--	--	--	--	--	--
SK1G00073122	1	cluster12:5442523-5443017	495	68.28	1	495	68.28	--	--	--	--	--	--	--
SK1G00074129	1	cluster12:18018969-18019463	495	69.7	1	495	69.7	--	--	--	--	--	--	--
SK1G00070595	1	cluster10:24899964-24900466	503	70.58	1	503	70.58	--	--	--	--	--	--	--
SK1G00074802	1	cluster12:24074938-24075453	516	69.38	1	516	69.38	--	--	--	--	--	--	--
SK1G00073046	1	cluster12:4471979-4472503	525	69.9	1	525	69.9	--	--	--	--	--	--	--
SK1G00070625	1	cluster10:25224609-25225136	528	69.51	1	528	69.51	--	--	--	--	--	--	--
SK1G00074433	1	cluster12:21200364-21200891	528	72.16	1	528	72.16	--	--	--	--	--	--	--
SK1G00070624	1	cluster10:25220440-25220970	531	69.49	1	531	69.49	--	--	--	--	--	--	--
SK1G00073288	1	cluster12:8237618-8238154	537	44.13	1	537	44.13	--	--	--	--	--	--	--
SK1G00070626	1	cluster10:25268551-25269090	540	70.56	1	540	70.56	--	--	--	--	--	--	--
SK1G00073115	1	cluster12:5317703-5318242	540	67.78	2	507	68.24	1	33	60.61	--	--	--	--
SK1G00074737	1	cluster12:23565830-23566389	560	48.93	2	429	50.82	1	131	42.75	--	--	--	--
SK1G00071106	1	cluster11:3421639-3422202	564	70.74	1	564	70.74	--	--	--	--	--	--	--
SK1G00072900	1	cluster12:1793996-1794562	567	67.72	1	567	67.72	--	--	--	--	--	--	--
SK1G00073991	1	cluster12:16726793-16727359	567	70.72	1	567	70.72	--	--	--	--	--	--	--
SK1G00073130	1	cluster12:5566774-5567349	576	42.53	2	204	53.92	1	372	36.29	--	--	--	--
SK1G00070234	1	cluster10:21368186-21368764	579	72.54	1	579	72.54	--	--	--	--	--	--	--
SK1G00072888	1	cluster12:1623042-1623621	580	47.07	2	450	49.56	1	130	38.46	--	--	--	--
SK1G00071375	1	cluster11:5566153-5566737	585	76.92	1	585	76.92	--	--	--	--	--	--	--
SK1G00073105	1	cluster12:5190329-5190922	594	62.96	1	594	62.96	--	--	--	--	--	--	--
SK1G00071248	1	cluster11:4560212-4560825	614	68.57	2	525	70.67	1	89	56.18	--	--	--	--
SK1G00071347	1	cluster11:5282093-5282720	628	60.03	2	438	66.67	1	190	44.74	--	--	--	--
SK1G00074564	1	cluster12:22174038-22174670	633	71.72	1	633	71.72	--	--	--	--	--	--	--
SK1G00070245	1	cluster10:21462979-21463619	641	43.84	3	240	57.5	2	401	35.66	--	--	--	--
SK1G00071306	1	cluster11:4934728-4935372	645	73.8	1	645	73.8	--	--	--	--	--	--	--
SK1G00074594	1	cluster12:22370814-22371467	654	75.38	1	654	75.38	--	--	--	--	--	--	--
SK1G00074474	1	cluster12:21550122-21550778	657	73.97	1	657	73.97	--	--	--	--	--	--	--
SK1G00073106	1	cluster12:5225008-5225673	666	47.6	1	666	47.6	--	--	--	--	--	--	--
SK1G00074179	1	cluster12:18324977-18325657	681	49.05	3	441	54.2	2	240	39.58	--	--	--	--
SK1G00070244	1	cluster10:21454526-21455209	684	73.98	2	573	77.31	1	111	56.76	--	--	--	--
SK1G00072876	1	cluster12:1368587-1369276	690	68.55	1	690	68.55	--	--	--	--	--	--	--
SK1G00073752	1	cluster12:14453736-14454425	690	52.17	3	291	67.01	2	399	41.35	--	--	--	--
SK1G00073563	1	cluster12:11963425-11964119	695	43.74	2	534	42.7	1	161	47.2	--	--	--	--
SK1G00074203	1	cluster12:18542329-18543024	696	72.56	1	696	72.56	--	--	--	--	--	--	--
SK1G00070951	1	cluster11:2068371-2069078	708	69.21	1	708	69.21	--	--	--	--	--	--	--
SK1G00073646	1	cluster12:12904375-12905098	724	61.33	2	711	61.32	1	13	61.54	--	--	--	--
SK1G00073788	1	cluster12:14803302-14804027	726	50.41	3	432	59.72	2	294	36.73	--	--	--	--
SK1G00074038	1	cluster12:17254903-17255629	727	71.25	2	654	73.39	1	73	52.05	--	--	--	--
SK1G00070726	1	cluster11:55272-55999	728	37.5	2	243	56.79	1	485	27.84	--	--	--	--
SK1G00072885	1	cluster12:1546135-1546875	741	63.7	1	741	63.7	--	--	--	--	--	--	--
SK1G00074602	1	cluster12:22419335-22420090	756	65.34	1	756	65.34	--	--	--	--	--	--	--
SK1G00070226	1	cluster10:21324376-21325134	759	73.78	1	759	73.78	--	--	--	--	--	--	--
SK1G00072832	1	cluster12:548415-549190	776	66.24	3	677	67.5	2	99	57.58	71	57.75	--	--
SK1G00074111	1	cluster12:17858023-17858805	783	72.03	1	783	72.03	--	--	--	--	--	--	--
SK1G00074137	1	cluster12:18062944-18063727	784	60.71	2	645	62.64	1	139	51.8	--	--	--	--
SK1G00070948	1	cluster11:2031708-2032502	795	65.79	1	795	65.79	--	--	--	--	--	--	--
SK1G00070860	1	cluster11:1422214-1423014	801	66.79	1	801	66.79	--	--	--	--	--	--	--
SK1G00073509	1	cluster12:11362939-11363742	804	73.63	1	804	73.63	--	--	--	--	--	--	--
SK1G00071170	1	cluster11:3999130-3999960	831	61.73	2	717	64.57	1	114	43.86	--	--	--	--
SK1G00072910	1	cluster12:1906727-1907557	831	68.35	1	831	68.35	--	--	--	--	--	--	--
SK1G00072017	1	cluster11:12969130-12969971	842	36.94	2	279	44.44	1	563	33.21	--	--	--	--
SK1G00073305	1	cluster12:8424036-8424908	873	46.39	2	819	46.89	1	54	38.89	--	--	--	--
SK1G00070296	1	cluster10:21853640-21854548	909	44	4	345	58.55	3	564	35.11	--	--	--	--
SK1G00073734	1	cluster12:14263800-14264711	912	65.46	5	642	69.31	4	270	56.3	--	--	--	--
SK1G00074028	1	cluster12:17090439-17091353	915	61.09	4	606	66.83	3	309	49.84	--	--	--	--
SK1G00071018	1	cluster11:2630298-2631233	936	76.07	1	936	76.07	--	--	--	--	--	--	--
SK1G00073317	1	cluster12:8735392-8736348	957	47.96	1	957	47.96	--	--	--	--	--	--	--
SK1G00070927	1	cluster11:1904119-1905080	962	42.2	2	945	42.43	1	17	29.41	--	--	--	--
SK1G00074047	1	cluster12:17352571-17353545	975	70.05	1	975	70.05	--	--	--	--	--	--	--
SK1G00073951	1	cluster12:16367761-16368777	1017	71.29	1	1017	71.29	--	--	--	--	--	--	--
SK1G00074422	1	cluster12:21132574-21133597	1024	73.05	2	948	74.58	1	76	53.95	--	--	--	--
SK1G00074351	1	cluster12:19778367-19779395	1029	70.17	1	1029	70.17	--	--	--	--	--	--	--
SK1G00071666	1	cluster11:8545736-8546766	1031	40.54	3	492	48.17	2	539	33.58	--	--	--	--
SK1G00074050	1	cluster12:17376162-17377208	1047	70.49	1	1047	70.49	--	--	--	--	--	--	--
SK1G00070387	1	cluster10:22978934-22979989	1056	72.44	1	1056	72.44	--	--	--	--	--	--	--
SK1G00073058	1	cluster12:4597081-4598143	1063	48.35	2	366	64.48	1	697	39.89	--	--	--	--
SK1G00074796	1	cluster12:24034535-24035602	1068	71.91	1	1068	71.91	--	--	--	--	--	--	--
SK1G00071230	1	cluster11:4438648-4439728	1081	42.28	2	336	61.31	1	745	33.69	--	--	--	--
SK1G00071164	1	cluster11:3924450-3925537	1088	59.28	2	1017	60.28	1	71	45.07	76	52.63	245	42.04
SK1G00074707	1	cluster12:23293968-23295065	1098	60.38	3	963	63.55	2	135	37.78	--	--	--	--
SK1G00073140	1	cluster12:5777759-5778859	1101	46.96	1	1101	46.96	--	--	--	--	--	--	--
SK1G00073819	1	cluster12:15094283-15095410	1128	67.2	2	678	71.68	1	450	60.44	--	--	--	--
SK1G00073585	1	cluster12:12226029-12227162	1134	51.5	1	1134	51.5	--	--	--	--	--	--	--
SK1G00073561	1	cluster12:11932014-11933168	1155	54.55	1	1155	54.55	--	--	--	--	--	--	--
SK1G00073630	1	cluster12:12709223-12710377	1155	74.03	1	1155	74.03	--	--	--	--	--	--	--
SK1G00074171	1	cluster12:18287588-18288758	1171	63.11	5	777	70.91	4	394	47.72	--	--	--	--
SK1G00070603	1	cluster10:25014192-25015372	1181	70.87	2	1110	70.63	1	71	74.65	--	--	--	--
SK1G00071259	1	cluster11:4623522-4624708	1187	70.6	2	1092	71.25	1	95	63.16	--	--	--	--
SK1G00071654	1	cluster11:8446697-8447884	1188	50.34	1	1188	50.34	--	--	--	--	--	--	--
SK1G00073198	1	cluster12:6774879-6776072	1194	49.08	1	1194	49.08	--	--	--	--	--	--	--
SK1G00074021	1	cluster12:17006051-17007264	1214	52.55	2	681	71.81	1	533	27.95	--	--	--	--
SK1G00073116	1	cluster12:5318817-5320046	1230	63.98	10	843	66.67	9	387	58.14	--	--	--	--
SK1G00072530	1	cluster11:21552382-21553635	1254	56.38	1	1254	56.38	--	--	--	87	60.92	--	--
SK1G00074057	1	cluster12:17424671-17425938	1268	49.21	3	261	69.73	2	1007	43.89	--	--	--	--
SK1G00070482	1	cluster10:23937499-23938779	1281	59.41	1	1281	59.41	--	--	--	--	--	--	--
SK1G00071341	1	cluster11:5213482-5214768	1287	64.57	1	1287	64.57	--	--	--	--	--	--	--
SK1G00074424	1	cluster12:21155528-21156815	1288	62.97	4	972	68.83	3	316	44.94	--	--	--	--
SK1G00070658	1	cluster10:25486584-25487881	1298	53.54	2	1182	53.21	1	116	56.9	--	--	--	--
SK1G00070579	1	cluster10:24745539-24746842	1304	50.46	2	894	56.04	1	410	38.29	--	--	--	--
SK1G00073396	1	cluster12:9693018-9694327	1310	42.82	2	606	51.16	1	704	35.65	--	--	--	--
SK1G00071116	1	cluster11:3492081-3493391	1311	69.18	1	1311	69.18	--	--	--	--	--	--	--
SK1G00072341	1	cluster11:18852674-18853991	1318	54.1	2	1227	55.42	1	91	36.26	--	--	--	--
SK1G00070655	1	cluster10:25468798-25470140	1343	66.57	2	1257	67.94	1	86	46.51	--	--	--	--
SK1G00072861	1	cluster12:1159880-1161232	1353	54.62	2	1251	56.43	1	102	32.35	--	--	--	--
SK1G00072204	1	cluster11:16381276-16382640	1365	41.17	3	285	54.04	2	1080	37.78	--	--	--	--
SK1G00074473	1	cluster12:21536584-21537957	1374	56.7	1	1374	56.7	--	--	--	--	--	--	--
SK1G00074257	1	cluster12:19090082-19091473	1392	39.44	4	642	44.86	3	750	34.8	--	--	--	--
SK1G00073323	1	cluster12:8798193-8799590	1398	64.66	1	1398	64.66	--	--	--	--	--	--	--
SK1G00071300	1	cluster11:4887687-4889096	1410	64.18	1	1410	64.18	--	--	--	--	--	--	--
SK1G00074151	1	cluster12:18163699-18165108	1410	63.9	1	1410	63.9	--	--	--	--	--	--	--
SK1G00071181	1	cluster11:4056555-4057969	1415	44.03	3	471	62.63	2	944	34.75	63	46.03	--	--
SK1G00073453	1	cluster12:10659493-10660911	1419	56.03	2	1281	59.02	1	138	28.26	--	--	--	--
SK1G00070958	1	cluster11:2131389-2132808	1420	49.72	3	1020	53.82	2	400	39.25	141	56.74	363	39.39
SK1G00070249	1	cluster10:21503458-21504898	1441	46.08	3	1224	46.98	2	217	41.01	210	49.05	285	35.44
SK1G00071512	1	cluster11:6981089-6982546	1458	60.36	1	1458	60.36	--	--	--	--	--	--	--
SK1G00071053	1	cluster11:2891812-2893286	1475	50.44	3	810	64.07	2	665	33.83	--	--	--	--
SK1G00073619	1	cluster12:12578584-12580081	1498	62.08	3	1023	69.7	2	475	45.68	--	--	--	--
SK1G00073531	1	cluster12:11525296-11526822	1527	42.17	5	861	48.55	4	666	33.93	--	--	--	--
SK1G00074174	1	cluster12:18305478-18307011	1534	56.52	3	795	74.47	2	739	37.21	--	--	--	--
SK1G00073990	1	cluster12:16716183-16717717	1535	49.45	3	1399	49.61	2	136	47.79	--	--	1003	39.78
SK1G00074194	1	cluster12:18431341-18432889	1549	45.77	3	543	60.41	2	1006	37.87	--	--	--	--
SK1G00071084	1	cluster11:3239835-3241394	1560	67.82	1	1560	67.82	--	--	--	--	--	--	--
SK1G00072329	1	cluster11:18708738-18710335	1598	45.56	3	258	56.2	2	1340	43.51	--	--	--	--
SK1G00073795	1	cluster12:14843493-14845106	1614	62.45	2	1417	65.35	1	197	41.62	84	42.86	253	47.43
SK1G00074468	1	cluster12:21488728-21490362	1635	72.23	1	1635	72.23	--	--	--	--	--	--	--
SK1G00071419	1	cluster11:6079548-6081202	1655	39.34	6	762	43.44	5	893	35.83	--	--	--	--
SK1G00072833	1	cluster12:550677-552357	1681	56.69	3	975	69.85	2	706	38.53	--	--	--	--
SK1G00070775	1	cluster11:430983-432676	1694	42.15	4	723	49.79	3	971	36.46	--	--	--	--
SK1G00070839	1	cluster11:1244063-1245760	1698	37.81	3	381	40.16	2	1317	37.13	--	--	--	--
SK1G00073661	1	cluster12:13045698-13047401	1704	64.38	4	1348	67.8	3	356	51.4	50	64	299	55.18
SK1G00070973	1	cluster11:2269009-2270714	1706	64.48	4	1641	64.53	3	65	63.08	--	--	--	--
SK1G00070745	1	cluster11:209619-211336	1718	56.93	2	876	72.37	1	842	40.86	--	--	--	--
SK1G00072752	1	cluster11:24602985-24604709	1725	66.32	1	1725	66.32	--	--	--	--	--	--	--
SK1G00071508	1	cluster11:6954568-6956317	1750	68.69	3	1632	70.28	2	118	46.61	--	--	--	--
SK1G00074581	1	cluster12:22291692-22293452	1761	47.19	1	1761	47.19	--	--	--	--	--	--	--
SK1G00070580	1	cluster10:24762945-24764707	1763	41.41	4	1077	47.08	3	686	32.51	--	--	--	--
SK1G00071033	1	cluster11:2744161-2745929	1769	50.59	4	924	65.04	3	845	34.79	--	--	--	--
SK1G00071401	1	cluster11:5864351-5866122	1772	39.11	3	384	50.78	2	1388	35.88	--	--	--	--
SK1G00073550	1	cluster12:11826348-11828147	1800	45.78	6	1350	46.44	5	450	43.78	--	--	--	--
SK1G00072295	1	cluster11:18233902-18235706	1805	55.79	3	1095	62.37	2	710	45.63	--	--	--	--
SK1G00074739	1	cluster12:23569236-23571041	1806	45.57	6	981	53.92	5	825	35.64	--	--	--	--
SK1G00074686	1	cluster12:23058034-23059847	1814	67.36	4	1584	68.81	3	230	57.39	--	--	--	--
SK1G00071022	1	cluster11:2652737-2654558	1822	57.46	4	1158	69.52	3	664	36.45	--	--	--	--
SK1G00073913	1	cluster12:15927681-15929537	1857	53.58	1	1857	53.58	--	--	--	--	--	--	--
SK1G00072646	1	cluster11:23250674-23252542	1869	52.86	2	288	66.32	1	1581	50.41	--	--	--	--
SK1G00073284	1	cluster12:8200244-8202135	1892	36.79	5	720	43.33	4	1172	32.76	--	--	--	--
SK1G00071136	1	cluster11:3616118-3618017	1900	50.05	5	999	59.16	4	901	39.96	--	--	--	--
SK1G00070841	1	cluster11:1248814-1250718	1905	56.64	5	1110	70.09	4	795	37.86	--	--	--	--
SK1G00070868	1	cluster11:1514520-1516459	1940	46.44	6	1390	51.08	5	550	34.73	86	47.67	164	34.76
SK1G00071010	1	cluster11:2582085-2584032	1948	44.76	3	1110	47.12	2	838	41.65	--	--	--	--
SK1G00074367	1	cluster12:19949601-19951551	1951	51.26	3	1374	57.86	2	577	35.53	--	--	--	--
SK1G00072335	1	cluster11:18772135-18774097	1963	53.08	2	1488	59.81	1	475	32	--	--	--	--
SK1G00073582	1	cluster12:12210081-12212056	1976	37.4	2	579	46.11	1	1397	33.79	--	--	--	--
SK1G00070818	1	cluster11:1066518-1068494	1977	73.34	1	1977	73.34	--	--	--	--	--	--	--
SK1G00071463	1	cluster11:6571433-6573439	2007	44.84	4	649	56.55	3	1358	39.25	42	83.33	184	39.13
SK1G00070694	1	cluster10:25725498-25727515	2018	57.98	2	1871	60.07	1	147	31.29	--	--	194	31.44
SK1G00071152	1	cluster11:3788575-3790597	2023	66.83	4	1767	69.38	3	256	49.22	--	--	--	--
SK1G00072051	1	cluster11:13484782-13486809	2028	49.75	2	405	44.2	1	1623	51.14	--	--	--	--
SK1G00074670	1	cluster12:22932355-22934438	2084	47.94	8	849	53.36	7	1235	44.21	117	59.83	348	46.84
SK1G00074210	1	cluster12:18619498-18621589	2092	58.99	3	840	63.93	2	1252	55.67	--	--	--	--
SK1G00070968	1	cluster11:2198479-2200575	2097	67.67	1	2097	67.67	--	--	--	--	--	--	--
SK1G00071070	1	cluster11:3081193-3083320	2128	57.89	3	1380	67.75	2	748	39.71	--	--	--	--
SK1G00072988	1	cluster12:3324111-3326241	2131	53.36	2	978	72.6	1	1153	37.03	--	--	--	--
SK1G00070647	1	cluster10:25394173-25396306	2134	38.05	5	429	47.09	4	1705	35.78	--	--	--	--
SK1G00070339	1	cluster10:22451188-22453324	2137	38.93	6	1320	43.18	5	817	32.07	--	--	--	--
SK1G00072919	1	cluster12:2129940-2132077	2138	38.31	2	309	52.75	1	1829	35.87	--	--	--	--
SK1G00074260	1	cluster12:19105485-19107623	2139	63.39	3	1725	70.26	2	414	34.78	--	--	--	--
SK1G00070229	1	cluster10:21332333-21334493	2161	41.46	3	342	67.25	2	1819	36.61	--	--	--	--
SK1G00073210	1	cluster12:7048575-7050743	2169	41.31	2	1738	43.73	1	431	31.55	830	39.04	446	40.36
SK1G00074256	1	cluster12:19084360-19086535	2176	47.24	7	1042	55.66	6	1134	39.51	148	72.97	358	41.06
SK1G00074442	1	cluster12:21278410-21280593	2184	41.44	5	573	60.73	4	1611	34.57	--	--	--	--
SK1G00073808	1	cluster12:14957046-14959233	2188	43.42	3	726	53.99	2	1462	38.17	--	--	--	--
SK1G00071648	1	cluster11:8406154-8408352	2199	43.2	2	1200	51.42	1	999	33.33	--	--	--	--
SK1G00071437	1	cluster11:6344091-6346291	2201	31.67	5	753	34.4	4	1448	30.25	--	--	--	--
SK1G00073120	1	cluster12:5396265-5398493	2229	54.33	3	1901	58.65	2	328	29.27	95	43.16	276	34.78
SK1G00071234	1	cluster11:4455675-4457954	2280	50.83	6	1570	53.25	5	710	45.49	--	--	223	36.32
SK1G00072725	1	cluster11:24268819-24271100	2282	58.33	3	1269	69.11	2	1013	44.82	--	--	--	--
SK1G00074563	1	cluster12:22169888-22172175	2288	42.44	3	303	52.15	2	1985	40.96	--	--	--	--
SK1G00070488	1	cluster10:23997583-23999871	2289	37.05	6	1452	41.12	5	837	29.99	--	--	--	--
SK1G00073061	1	cluster12:4619600-4621893	2294	38.58	5	465	52.9	4	1829	34.94	--	--	--	--
SK1G00074453	1	cluster12:21354107-21356403	2297	51.07	9	1426	56.59	8	871	42.02	--	--	217	32.26
SK1G00073893	1	cluster12:15742567-15744868	2302	41.96	4	747	52.07	3	1555	37.11	57	57.89	--	--
SK1G00073026	1	cluster12:4074942-4077244	2303	59.14	3	1581	71.03	2	722	33.1	--	--	--	--
SK1G00071400	1	cluster11:5854904-5857210	2307	45.6	3	1503	50.3	2	804	36.82	152	38.82	376	33.51
SK1G00073665	1	cluster12:13078103-13080469	2367	45.16	2	2340	45.21	1	27	40.74	--	--	--	--
SK1G00070471	1	cluster10:23823217-23825600	2384	61.07	3	1935	67.34	2	449	34.08	--	--	--	--
SK1G00073190	1	cluster12:6678664-6681088	2425	46.27	2	579	68.39	1	1846	39.33	--	--	--	--
SK1G00072860	1	cluster12:1154256-1156723	2468	37.64	4	411	49.15	3	2057	35.34	--	--	--	--
SK1G00070812	1	cluster11:1038293-1040788	2496	43.19	2	2193	44.51	1	303	33.66	--	--	--	--
SK1G00074388	1	cluster12:20736804-20739311	2508	52.67	1	2508	52.67	--	--	--	--	--	--	--
SK1G00074580	1	cluster12:22273833-22276415	2583	42.66	7	1218	46.63	6	1365	39.12	187	64.71	383	36.81
SK1G00072373	1	cluster11:19248603-19251191	2589	51.68	1	2589	51.68	--	--	--	--	--	--	--
SK1G00070605	1	cluster10:25024861-25027465	2605	45.76	3	2099	47.74	2	506	37.55	164	74.39	171	36.26
SK1G00073508	1	cluster12:11359087-11361704	2618	54.66	3	1815	63.14	2	803	35.49	--	--	--	--
SK1G00072544	1	cluster11:21840393-21843018	2626	44.74	6	963	62.1	5	1663	34.7	--	--	--	--
SK1G00070256	1	cluster10:21549124-21551773	2650	41.89	4	670	54.03	3	1980	37.78	150	69.33	199	35.68
SK1G00071021	1	cluster11:2648513-2651177	2665	39.25	5	363	47.11	4	2302	38.01	--	--	--	--
SK1G00070715	1	cluster10:26844601-26847295	2695	43.75	4	1419	47.43	3	1276	39.66	--	--	--	--
SK1G00074725	1	cluster12:23477480-23480204	2725	50.09	2	945	65.71	1	1780	41.8	--	--	--	--
SK1G00071404	1	cluster11:5891665-5894400	2736	50.95	1	2736	50.95	--	--	--	--	--	--	--
SK1G00071328	1	cluster11:5134667-5137433	2767	40.77	6	791	49.81	5	1976	37.15	115	70.43	181	41.99
SK1G00071163	1	cluster11:3922092-3924879	2788	35.9	2	408	61.52	1	2380	31.51	--	--	--	--
SK1G00071139	1	cluster11:3651661-3654470	2810	46.69	2	2766	46.64	1	44	50	--	--	--	--
SK1G00071947	1	cluster11:11939254-11942078	2825	48.04	4	2586	50	3	239	26.78	--	--	--	--
SK1G00074724	1	cluster12:23474225-23477056	2832	44.67	7	1834	49.4	6	998	35.97	68	67.65	272	40.81
SK1G00074248	1	cluster12:19027470-19030319	2850	46.21	4	1218	60.67	3	1632	35.42	24	50	--	--
SK1G00071012	1	cluster11:2588894-2591753	2860	56.26	8	1943	60.58	7	917	47.11	2	50	--	--
SK1G00071137	1	cluster11:3619821-3622688	2868	57.25	6	1668	71.04	5	1200	38.08	--	--	--	--
SK1G00074362	1	cluster12:19902825-19905695	2871	48.87	4	1443	59.11	3	1428	38.52	--	--	--	--
SK1G00070444	1	cluster10:23626302-23629182	2881	39.67	6	798	62.91	5	2083	30.77	--	--	--	--
SK1G00073040	1	cluster12:4352583-4355467	2885	47.8	2	1584	63.89	1	1301	28.21	--	--	--	--
SK1G00071336	1	cluster11:5184086-5186978	2893	48.57	3	1038	65.41	2	1855	39.14	--	--	--	--
SK1G00071955	1	cluster11:12029269-12032218	2950	47.53	3	501	72.85	2	2449	42.34	--	--	--	--
SK1G00070313	1	cluster10:22094106-22097056	2951	48.46	4	2048	54.2	3	903	35.44	90	64.44	323	36.53
SK1G00071411	1	cluster11:5945737-5948700	2964	38.8	11	639	46.32	10	2325	36.73	--	--	--	--
SK1G00074566	1	cluster12:22183147-22186145	2999	46.88	9	1654	54.96	8	1345	36.95	103	60.19	315	40.95
SK1G00074353	1	cluster12:19788036-19791038	3003	44.52	7	978	59.61	6	2025	37.23	--	--	--	--
SK1G00071025	1	cluster11:2684257-2687273	3017	45.58	5	1785	47.84	4	1232	42.29	80	67.5	235	39.15
SK1G00070321	1	cluster10:22173190-22176227	3038	43.32	8	1943	49.05	7	1095	33.15	38	71.05	510	39.41
SK1G00071103	1	cluster11:3404193-3407281	3089	43.7	8	1128	52.04	7	1961	38.91	--	--	--	--
SK1G00072300	1	cluster11:18316265-18319387	3123	40.7	5	663	61.39	4	2460	35.12	--	--	--	--
SK1G00073537	1	cluster12:11633805-11636973	3169	40.99	8	1302	49.92	7	1867	34.76	182	65.93	181	38.12
SK1G00071664	1	cluster11:8524562-8527757	3196	49.31	5	1642	60.6	4	1554	37.39	308	46.1	191	36.13
SK1G00073823	1	cluster12:15130959-15134163	3205	40.09	7	2256	43.53	6	949	31.93	--	--	--	--
SK1G00070430	1	cluster10:23460409-23463665	3257	38.84	2	426	70.19	1	2831	34.12	--	--	--	--
SK1G00071233	1	cluster11:4450384-4453661	3278	42.74	6	990	55.35	5	2288	37.28	--	--	--	--
SK1G00071004	1	cluster11:2536002-2539286	3285	43.04	9	969	62.85	8	2316	34.76	--	--	--	--
SK1G00072928	1	cluster12:2266670-2269962	3293	43.52	7	1218	58.13	6	2075	34.94	--	--	--	--
SK1G00074078	1	cluster12:17618788-17622091	3304	44.25	4	1131	64.54	3	2173	33.69	--	--	--	--
SK1G00071432	1	cluster11:6270142-6273453	3312	46.86	5	864	50.69	4	2448	45.51	142	68.31	263	31.18
SK1G00071251	1	cluster11:4573968-4577280	3313	42.92	3	1476	51.02	2	1837	36.42	--	--	--	--
SK1G00073293	1	cluster12:8290023-8293338	3316	40.38	4	770	49.09	3	2546	37.75	53	58.49	291	37.8
SK1G00073465	1	cluster12:10828457-10831774	3318	45.21	3	342	57.6	2	2976	43.78	--	--	--	--
SK1G00073403	1	cluster12:9791727-9795058	3332	47.36	2	3312	47.4	1	20	40	--	--	--	--
SK1G00070326	1	cluster10:22218667-22222020	3354	42.61	5	1317	47.15	4	2037	39.67	--	--	--	--
SK1G00073873	1	cluster12:15588081-15591442	3362	64.22	2	3282	65.02	1	80	31.25	--	--	--	--
SK1G00071005	1	cluster11:2539245-2542616	3372	32.15	6	1131	40.67	5	2241	27.84	--	--	--	--
SK1G00070653	1	cluster10:25455544-25458918	3375	46.93	11	1713	58.2	10	1662	35.32	--	--	--	--
SK1G00074596	1	cluster12:22374250-22377626	3377	40.92	12	1482	48.25	11	1895	35.2	205	67.32	275	36.36
SK1G00073423	1	cluster12:10260466-10263860	3395	42.56	8	2504	44.53	7	891	37.04	1999	45.22	202	37.62
SK1G00072852	1	cluster12:884251-887665	3415	41.7	4	1494	45.58	3	1921	38.68	113	71.68	1490	41.34
SK1G00073796	1	cluster12:14846028-14849467	3440	47.44	2	594	68.01	1	2846	43.15	--	--	--	--
SK1G00071104	1	cluster11:3407469-3410909	3441	54.29	2	1704	67.37	1	1737	41.45	47	61.7	259	42.08
SK1G00072688	1	cluster11:23729321-23732777	3457	42.93	2	3384	43.26	1	73	27.4	--	--	--	--
SK1G00074074	1	cluster12:17562317-17565781	3465	52.81	8	1914	57.94	7	1551	46.49	191	47.12	220	35.45
SK1G00072013	1	cluster11:12916318-12919812	3495	40.97	4	1503	47.04	3	1992	36.4	--	--	--	--
SK1G00073960	1	cluster12:16421951-16425502	3552	50.31	6	2720	54.89	5	832	35.34	312	50	281	46.26
SK1G00073062	1	cluster12:4626605-4630169	3565	44.54	3	2323	48.95	2	1242	36.31	383	66.58	236	32.63
SK1G00071225	1	cluster11:4369768-4373338	3571	47.3	4	1758	59.61	3	1813	35.36	81	48.15	465	38.28
SK1G00071301	1	cluster11:4896612-4900260	3649	46.59	7	930	67.53	6	2719	39.43	--	--	--	--
SK1G00074104	1	cluster12:17822880-17826530	3651	50.81	5	1775	62.59	4	1876	39.66	182	60.44	387	42.38
SK1G00070957	1	cluster11:2121872-2125529	3658	52.3	3	1896	59.97	2	1762	44.04	57	71.93	417	36.21
SK1G00071032	1	cluster11:2735680-2739352	3673	44.46	4	1399	53.47	3	2274	38.92	694	63.98	435	38.16
SK1G00071396	1	cluster11:5795508-5799188	3681	40.02	9	834	52.52	8	2847	36.35	--	--	--	--
SK1G00071349	1	cluster11:5295529-5299224	3696	50.84	2	1683	68.92	1	2013	35.72	--	--	--	--
SK1G00073021	1	cluster12:4006464-4010160	3697	42.47	8	1195	47.7	7	2502	39.97	189	65.08	343	41.4
SK1G00071007	1	cluster11:2555190-2558924	3735	44.12	5	1578	52.28	4	2157	38.15	195	61.03	273	37.73
SK1G00074426	1	cluster12:21161970-21165750	3781	41.13	12	1534	47.07	11	2247	37.07	101	67.33	413	42.13
SK1G00070362	1	cluster10:22742576-22746393	3818	48.27	5	3225	51.07	4	593	33.05	--	--	--	--
SK1G00074061	1	cluster12:17462856-17466681	3826	50.31	3	978	69.73	2	2848	43.64	--	--	--	--
SK1G00074037	1	cluster12:17249690-17253516	3827	39.98	9	1692	45.45	8	2135	35.64	144	68.06	606	38.78
SK1G00070686	1	cluster10:25652021-25655867	3847	46.87	13	2189	51.8	12	1658	40.35	55	54.55	214	42.52
SK1G00073985	1	cluster12:16653619-16657476	3858	38.6	11	1272	47.8	10	2586	34.07	--	--	--	--
SK1G00074100	1	cluster12:17801264-17805142	3879	40.73	11	1734	46.08	10	2145	36.41	73	58.9	479	37.58
SK1G00074559	1	cluster12:22146840-22150719	3880	43.74	5	1242	58.45	4	2638	36.81	--	--	--	--
SK1G00073957	1	cluster12:16399061-16403052	3992	42.99	9	1812	51.1	8	2180	36.24	--	--	--	--
SK1G00071064	1	cluster11:3022948-3026949	4002	41.08	5	1790	47.32	4	2212	36.03	158	55.06	498	36.95
SK1G00074360	1	cluster12:19887985-19892000	4016	40.91	7	1266	55.77	6	2750	34.07	--	--	--	--
SK1G00070829	1	cluster11:1165809-1169827	4019	40.73	14	1474	48.91	13	2545	35.99	21	61.9	217	38.71
SK1G00073549	1	cluster12:11822122-11826203	4082	38	11	1905	45.88	10	2177	31.1	--	--	--	--
SK1G00073983	1	cluster12:16641882-16645979	4098	40.46	5	1009	50.35	4	3089	37.23	88	62.5	183	38.25
SK1G00072589	1	cluster11:22476302-22480403	4102	40.3	5	1035	62.22	4	3067	32.9	--	--	--	--
SK1G00072829	1	cluster12:527827-531928	4102	40.39	7	2269	45.04	6	1833	34.64	1282	48.28	450	35.11
SK1G00073127	1	cluster12:5537375-5541486	4112	47.81	4	2148	53.82	3	1964	41.24	--	--	--	--
SK1G00072610	1	cluster11:22785765-22789886	4122	44.64	5	1953	51.72	4	2169	38.27	--	--	--	--
SK1G00071134	1	cluster11:3594894-3599051	4158	41.58	10	1969	49.37	9	2189	34.58	--	--	382	38.74
SK1G00073117	1	cluster12:5320526-5324697	4172	40.63	13	1749	45.45	12	2423	37.14	151	64.9	482	34.44
SK1G00072077	1	cluster11:13803481-13807659	4179	42.23	7	1113	59.39	6	3066	36.01	--	--	--	--
SK1G00074506	1	cluster12:21726120-21730328	4209	43.43	4	2979	46.86	3	1230	35.12	861	49.01	429	40.79
SK1G00070480	1	cluster10:23908720-23912932	4213	42.35	5	801	54.56	4	3412	39.48	--	--	--	--
SK1G00071451	1	cluster11:6481966-6486193	4228	53.95	2	3642	57.3	1	586	33.11	--	--	--	--
SK1G00072288	1	cluster11:18096511-18100758	4248	43.9	3	2676	45.37	2	1572	41.41	--	--	--	--
SK1G00072925	1	cluster12:2189199-2193448	4250	40.45	6	2985	41.54	5	1265	37.87	--	--	483	38.1
SK1G00070838	1	cluster11:1238847-1243155	4309	46.21	10	1578	62.86	9	2731	36.58	--	--	--	--
SK1G00073876	1	cluster12:15620067-15624438	4372	58.71	11	3459	62.79	10	913	43.26	93	67.74	198	40.4
SK1G00073029	1	cluster12:4103001-4107384	4384	37.29	6	1080	41.67	5	3304	35.87	--	--	--	--
SK1G00074227	1	cluster12:18820131-18824519	4389	39.19	4	2525	44.4	3	1864	32.14	163	44.79	124	27.42
SK1G00073964	1	cluster12:16472006-16476426	4421	40.51	2	1783	54.4	1	2638	31.12	64	46.88	150	29.33
SK1G00073806	1	cluster12:14948293-14952729	4437	52.6	3	4200	53.64	2	237	34.18	719	48.68	823	46.78
SK1G00072545	1	cluster11:21880415-21884932	4518	51.79	3	4470	51.7	2	48	60.42	--	--	--	--
SK1G00074445	1	cluster12:21297854-21302383	4530	49.65	14	2839	53.22	13	1691	43.64	--	--	166	49.4
SK1G00072570	1	cluster11:22177257-22181822	4566	51.1	1	4566	51.1	--	--	--	--	--	--	--
SK1G00070596	1	cluster10:24906415-24910990	4576	38.61	11	1915	46.06	10	2661	33.26	99	53.54	148	34.46
SK1G00071444	1	cluster11:6414912-6419500	4589	48.99	3	2165	64.94	2	2424	34.74	100	73	241	34.02
SK1G00074127	1	cluster12:17997653-18002275	4623	40.43	2	921	70.03	1	3702	33.06	--	--	--	--
SK1G00073388	1	cluster12:9520638-9525311	4674	38.94	9	966	50.93	8	3708	35.81	--	--	--	--
SK1G00070607	1	cluster10:25036685-25041362	4678	40.7	11	1528	50.2	10	3150	36.1	65	53.85	236	38.14
SK1G00074156	1	cluster12:18209142-18213841	4700	41.26	6	2085	48.97	5	2615	35.11	222	71.62	387	37.98
SK1G00071272	1	cluster11:4699484-4704220	4737	39.43	9	1575	48.83	8	3162	34.76	--	--	--	--
SK1G00070821	1	cluster11:1090434-1095192	4759	44.27	3	861	67.94	2	3898	39.05	--	--	--	--
SK1G00071073	1	cluster11:3086951-3091733	4783	39.64	14	1524	47.05	13	3259	36.18	--	--	--	--
SK1G00071386	1	cluster11:5700845-5705667	4823	43.56	7	1240	52.66	6	3583	40.41	222	50	403	43.18
SK1G00071299	1	cluster11:4875070-4879897	4828	44.78	9	1830	65.36	8	2998	32.22	--	--	--	--
SK1G00070598	1	cluster10:24945057-24949903	4847	36.58	10	1431	46.33	9	3416	32.49	--	--	--	--
SK1G00070599	1	cluster10:24962128-24967000	4873	42.34	14	2506	48.84	13	2367	35.45	234	61.97	406	35.96
SK1G00071006	1	cluster11:2543347-2548254	4908	42.58	15	2200	51.36	14	2708	35.45	46	65.22	414	38.16
SK1G00070307	1	cluster10:22026654-22031591	4938	56.12	2	2550	59.37	1	2388	52.64	--	--	--	--
SK1G00071015	1	cluster11:2606095-2611038	4944	42.29	8	2229	50.52	7	2715	35.54	--	--	501	43.31
SK1G00074753	1	cluster12:23629588-23634534	4947	44.35	10	3556	47.98	9	1391	35.08	304	70.72	324	42.59
SK1G00072541	1	cluster11:21762322-21767269	4948	38.7	4	2094	50.24	3	2854	30.24	--	--	--	--
SK1G00073118	1	cluster12:5342419-5347407	4989	37.26	6	816	41.3	5	4173	36.47	--	--	--	--
SK1G00071074	1	cluster11:3097082-3102104	5023	42.96	12	1381	55.39	11	3642	38.25	61	55.74	--	--
SK1G00071408	1	cluster11:5923781-5928833	5053	38.57	5	2745	40.77	4	2308	35.96	129	57.36	2169	36.51
SK1G00072266	1	cluster11:17663504-17668599	5096	36.79	6	930	49.78	5	4166	33.89	--	--	--	--
SK1G00071109	1	cluster11:3430668-3435768	5101	38.21	14	1419	50.81	13	3682	33.35	--	--	--	--
SK1G00074754	1	cluster12:23635476-23640591	5116	44.43	6	2152	54.51	5	2964	37.11	187	42.25	447	36.91
SK1G00073155	1	cluster12:5970037-5975157	5121	59.54	6	4158	61.83	5	963	49.64	--	--	--	--
SK1G00070836	1	cluster11:1214012-1219171	5160	43.97	10	2563	47.8	9	2597	40.2	--	--	334	38.32
SK1G00071672	1	cluster11:8600244-8605413	5170	49.42	4	1386	62.63	3	3784	44.58	78	65.38	207	43
SK1G00074101	1	cluster12:17806257-17811439	5183	50.13	6	1770	68.59	5	3413	40.55	--	--	--	--
SK1G00070898	1	cluster11:1695955-1701141	5187	43.59	6	1980	49.09	5	3207	40.19	165	66.67	402	41.29
SK1G00074079	1	cluster12:17623947-17629133	5187	42.45	8	2663	48.14	7	2524	36.45	--	--	770	38.31
SK1G00073094	1	cluster12:5084378-5089604	5227	37.73	10	771	47.34	9	4456	36.06	--	--	--	--
SK1G00071058	1	cluster11:2958318-2963546	5229	40.33	10	1873	48.69	9	3356	35.67	342	65.2	301	36.21
SK1G00070443	1	cluster10:23607859-23613111	5253	43.5	3	3144	49.36	2	2109	34.76	--	--	--	--
SK1G00070243	1	cluster10:21446440-21451721	5282	45.02	3	3803	46.67	2	1479	40.77	221	71.95	963	44.44
SK1G00073833	1	cluster12:15269698-15274989	5292	36.62	5	2802	41.47	4	2490	31.16	--	--	--	--
SK1G00070570	1	cluster10:24664649-24670000	5352	41.2	18	2376	49.96	17	2976	34.21	--	--	--	--
SK1G00074000	1	cluster12:16827134-16832534	5401	52.79	2	2091	72.93	1	3310	40.06	--	--	--	--
SK1G00070592	1	cluster10:24874617-24880040	5424	44.12	16	2901	51.6	15	2523	35.51	--	--	--	--
SK1G00073921	1	cluster12:16010469-16015894	5426	53.19	4	4492	56.48	3	934	37.37	1495	58.8	2664	53.57
SK1G00073651	1	cluster12:12938458-12943910	5453	39.92	10	1284	50.47	9	4169	36.68	--	--	--	--
SK1G00074045	1	cluster12:17320352-17325808	5457	43.41	8	1653	54.57	7	3804	38.56	--	--	--	--
SK1G00071405	1	cluster11:5895632-5901098	5467	42.51	9	2792	47.21	8	2675	37.61	603	56.22	856	41.82
SK1G00071488	1	cluster11:6768550-6774021	5472	41.19	18	2288	47.81	17	3184	36.43	228	61.84	335	40.6
SK1G00073836	1	cluster12:15304027-15309552	5526	35.63	5	2202	40.19	4	3324	32.61	--	--	--	--
SK1G00073154	1	cluster12:5945936-5951470	5535	50.84	4	2026	59.13	3	3509	46.05	133	51.88	357	37.54
SK1G00070431	1	cluster10:23463427-23468976	5550	41.42	7	1413	51.31	6	4137	38.05	--	--	--	--
SK1G00073618	1	cluster12:12557366-12562950	5585	51.76	4	2142	73.44	3	3443	38.28	--	--	--	--
SK1G00070427	1	cluster10:23440095-23445709	5615	40.28	13	1616	46.47	12	3999	37.78	83	69.88	468	36.32
SK1G00070834	1	cluster11:1195483-1201144	5662	39.46	3	2390	46.15	2	3272	34.57	348	50.29	236	38.14
SK1G00072746	1	cluster11:24529638-24535310	5673	38.08	10	1065	47.98	9	4608	35.79	--	--	--	--
SK1G00074001	1	cluster12:16845226-16850925	5700	49.02	3	2640	66.7	2	3060	33.76	--	--	--	--
SK1G00072915	1	cluster12:2038167-2043883	5717	43.69	2	359	53.48	1	5358	43.04	1	0	1	0
SK1G00070811	1	cluster11:1025289-1031018	5730	40.68	13	1530	50.46	12	4200	37.12	--	--	93	37.63
SK1G00072799	1	cluster12:109745-115518	5774	37.79	10	1306	44.33	9	4468	35.88	93	60.22	469	40.51
SK1G00074207	1	cluster12:18598968-18604743	5776	46.31	3	2901	52.81	2	2875	39.76	--	--	--	--
SK1G00074570	1	cluster12:22207270-22213045	5776	40.13	13	2284	44.75	12	3492	37.11	373	62.47	291	37.46
SK1G00071453	1	cluster11:6519557-6525397	5841	52.39	2	3309	69.17	1	2532	30.45	--	--	--	--
SK1G00074261	1	cluster12:19110884-19116792	5909	37.2	8	753	52.59	7	5156	34.95	--	--	--	--
SK1G00074202	1	cluster12:18534592-18540536	5945	39.66	7	1095	56.44	6	4850	35.88	--	--	--	--
SK1G00070529	1	cluster10:24322337-24328326	5990	40.97	13	3489	45.03	12	2501	35.31	--	--	--	--
SK1G00072584	1	cluster11:22373815-22379841	6027	45.73	2	3072	46.52	1	2955	44.91	--	--	--	--
SK1G00071507	1	cluster11:6945427-6951664	6238	55.96	2	2994	71.18	1	3244	41.92	--	--	--	--
SK1G00071059	1	cluster11:2964383-2970700	6318	41.72	8	1143	45.93	7	5175	40.79	--	--	--	--
SK1G00074094	1	cluster12:17760963-17767304	6342	39.89	9	2217	50.7	8	4125	34.08	--	--	--	--
SK1G00073981	1	cluster12:16618682-16625064	6383	44.88	12	4871	47.51	11	1512	36.44	2407	43.04	2898	44.72
SK1G00072706	1	cluster11:23968303-23974814	6512	39.91	7	2656	43.86	6	3856	37.19	227	52.42	239	36.82
SK1G00072047	1	cluster11:13310095-13316625	6531	36.69	3	393	40.97	2	6138	36.41	--	--	--	--
SK1G00073659	1	cluster12:13023151-13029756	6606	49.18	15	1764	68.82	14	4842	42.03	--	--	--	--
SK1G00074090	1	cluster12:17730841-17737457	6617	40.24	5	1464	49.45	4	5153	37.63	--	--	--	--
SK1G00074632	1	cluster12:22629603-22636231	6629	49.96	4	4053	58.52	3	2576	36.49	--	--	84	38.1
SK1G00071435	1	cluster11:6315927-6322744	6818	47.59	4	1797	65.94	3	5021	41.03	--	--	--	--
SK1G00070703	1	cluster10:25791480-25798336	6857	39.08	14	2201	46.07	13	4656	35.78	334	47.9	244	36.07
SK1G00070816	1	cluster11:1054521-1061417	6897	41.82	3	2325	51.05	2	4572	37.12	555	56.76	1458	48.9
SK1G00070450	1	cluster10:23667972-23674906	6935	39.83	12	3496	44.11	11	3439	35.48	--	--	130	36.15
SK1G00071480	1	cluster11:6682188-6689213	7026	40.96	13	2811	49.48	12	4215	35.28	--	--	--	--
SK1G00073433	1	cluster12:10379328-10386415	7088	43.16	10	2568	49.3	9	4520	39.67	--	--	--	--
SK1G00073944	1	cluster12:16295100-16302218	7119	41.48	6	2178	42.7	5	4941	40.94	--	--	--	--
SK1G00070917	1	cluster11:1847727-1854887	7161	39.03	19	2990	42.81	18	4171	36.32	155	63.87	300	36.67
SK1G00074172	1	cluster12:18292323-18299545	7223	44.07	16	5098	47.21	15	2125	36.52	3307	47.26	1365	40.22
SK1G00070597	1	cluster10:24929259-24936497	7239	38.04	7	2417	41.41	6	4822	36.35	1118	43.11	915	39.89
SK1G00072603	1	cluster11:22641454-22648738	7285	48.69	5	2415	62.19	4	4870	41.99	--	--	--	--
SK1G00070457	1	cluster10:23719703-23727001	7299	49.55	3	2333	68.32	2	4966	40.74	77	49.35	69	28.99
SK1G00073263	1	cluster12:7863762-7871091	7330	38.4	3	273	46.52	2	7057	38.09	--	--	--	--
SK1G00074358	1	cluster12:19867530-19874885	7356	40.46	6	2721	48.33	5	4635	35.84	--	--	2247	47
SK1G00074222	1	cluster12:18751307-18758696	7390	39	15	3187	46.47	14	4203	33.33	149	72.48	395	43.29
SK1G00071426	1	cluster11:6160120-6167544	7425	41.68	3	3422	50.2	2	4003	34.4	1528	38.42	496	33.67
SK1G00071465	1	cluster11:6589992-6597475	7484	39.15	18	2156	47.87	17	5328	35.62	198	69.7	374	41.44
SK1G00074644	1	cluster12:22728844-22736637	7794	38.79	16	2244	46.66	15	5550	35.6	--	--	--	--
SK1G00070613	1	cluster10:25136490-25144286	7797	39.85	20	2751	46.46	19	5046	36.25	--	--	--	--
SK1G00070571	1	cluster10:24671542-24679433	7892	41.57	21	3030	52.05	20	4862	35.05	--	--	--	--
SK1G00072421	1	cluster11:20014127-20022149	8023	37.98	8	2175	46.94	7	5848	34.64	--	--	--	--
SK1G00072864	1	cluster12:1231196-1239222	8027	40.34	17	2217	52.01	16	5810	35.89	--	--	--	--
SK1G00073100	1	cluster12:5164354-5172385	8032	38.71	18	2594	43.29	17	5438	36.52	88	64.77	328	32.62
SK1G00072866	1	cluster12:1255099-1263142	8044	37.93	11	1346	47.77	10	6698	35.95	--	--	59	42.37
SK1G00071423	1	cluster11:6132332-6140462	8131	41.45	17	3930	47.74	16	4201	35.56	1826	58.49	522	39.46
SK1G00073840	1	cluster12:15340885-15349044	8160	42.98	4	3117	47.35	3	5043	40.27	--	--	--	--
SK1G00072097	1	cluster11:13976822-13985131	8310	51.32	2	2493	70.04	1	5817	43.3	--	--	--	--
SK1G00074475	1	cluster12:21559617-21567960	8344	47.08	3	1332	74.25	2	7012	41.91	--	--	--	--
SK1G00073982	1	cluster12:16626784-16635169	8386	40.01	11	2892	47.13	10	5494	36.26	--	--	--	--
SK1G00072452	1	cluster11:20473580-20482075	8496	40.6	19	1272	60.69	18	7224	37.06	--	--	--	--
SK1G00070268	1	cluster10:21674632-21683198	8567	55.06	6	1596	60.46	5	6971	53.82	--	--	--	--
SK1G00071304	1	cluster11:4920059-4928636	8578	39.11	17	4145	45.6	16	4433	33.05	60	75	227	40.53
SK1G00073292	1	cluster12:8276839-8285493	8655	43.95	8	2977	49.14	7	5678	41.23	183	60.66	1717	39.84
SK1G00073032	1	cluster12:4140261-4148945	8685	41	11	2691	53.21	10	5994	35.52	--	--	--	--
SK1G00073048	1	cluster12:4502146-4510834	8689	38.12	11	1654	43.11	10	7035	36.94	70	52.86	672	38.39
SK1G00071448	1	cluster11:6453736-6462436	8701	40.94	6	1347	65.33	5	7354	36.47	--	--	--	--
SK1G00071891	1	cluster11:11047183-11056128	8946	44.58	7	3651	47.17	6	5295	42.8	--	--	--	--
SK1G00071431	1	cluster11:6260781-6269835	9055	39.23	17	3562	45.31	16	5493	35.28	73	56.16	681	38.47
SK1G00074212	1	cluster12:18634007-18643463	9457	44.4	9	3048	56.23	8	6409	38.77	--	--	--	--
SK1G00073997	1	cluster12:16792900-16802435	9536	38.03	14	1945	45.81	13	7591	36.04	411	64.48	265	37.74
SK1G00071908	1	cluster11:11465981-11475621	9641	42.05	7	4104	45.13	6	5537	39.77	--	--	48	35.42
SK1G00073931	1	cluster12:16118431-16128085	9655	49.51	4	3054	69.81	3	6601	40.12	--	--	--	--
SK1G00071434	1	cluster11:6304612-6314359	9748	51.23	7	8014	54.65	6	1734	35.41	4783	45.62	279	42.65
SK1G00072824	1	cluster12:458650-468524	9875	39.61	25	4375	46.42	24	5500	34.18	607	48.76	660	40.45
SK1G00070738	1	cluster11:167406-177765	10360	42.22	13	1541	42.18	12	8819	42.23	--	--	503	38.57
SK1G00074052	1	cluster12:17392030-17402827	10798	49.31	5	3204	68.1	4	7594	41.39	--	--	--	--
SK1G00074183	1	cluster12:18341445-18352303	10859	49.62	11	3657	69.92	10	7202	39.31	--	--	--	--
SK1G00071166	1	cluster11:3949635-3960494	10860	45.06	9	3154	61.95	8	7706	38.15	--	--	396	48.74
SK1G00072422	1	cluster11:20022939-20033870	10932	43.32	6	2328	52.36	5	8604	40.88	--	--	--	--
SK1G00072513	1	cluster11:21336581-21347608	11028	48.23	2	1509	59.64	1	9519	46.42	--	--	--	--
SK1G00074233	1	cluster12:18890726-18901983	11258	41.68	20	3476	51.93	19	7782	37.1	198	61.11	335	39.7
SK1G00072496	1	cluster11:21111161-21122559	11399	36.53	10	3812	43.02	9	7587	33.27	1644	43.73	1862	40.39
SK1G00071449	1	cluster11:6467415-6478920	11506	45.52	3	6297	51.01	2	5209	38.89	--	--	--	--
SK1G00072880	1	cluster12:1394517-1406360	11844	53.16	7	1536	65.17	6	10308	51.37	--	--	--	--
SK1G00072484	1	cluster11:20917513-20929671	12159	43.14	6	5631	48.61	5	6528	38.42	--	--	--	--
SK1G00073554	1	cluster12:11862731-11874988	12258	49.09	8	2206	57.62	7	10052	47.21	73	53.42	--	--
SK1G00074451	1	cluster12:21331287-21343623	12337	40.86	10	2078	51.59	9	10259	38.69	744	63.17	608	39.97
SK1G00072318	1	cluster11:18543465-18556684	13220	42.61	7	1959	57.43	6	11261	40.03	--	--	--	--
SK1G00074773	1	cluster12:23830420-23844399	13980	39.09	8	2987	58.92	7	10993	33.7	200	45	1587	55.07
SK1G00073813	1	cluster12:15029739-15043784	14046	44	11	1866	51.88	10	12180	42.79	--	--	--	--
SK1G00072154	1	cluster11:15302038-15316244	14207	44.04	3	6411	46.37	2	7796	42.12	1	100	6071	45.45
SK1G00071406	1	cluster11:5902148-5917132	14985	38.57	32	4271	46.08	31	10714	35.58	250	73.2	520	46.15
SK1G00074325	1	cluster12:19557368-19574968	17601	39.73	22	7924	42.38	21	9677	37.56	233	70.39	581	43.72
SK1G00071160	1	cluster11:3887015-3905286	18272	48.39	12	3625	61.08	11	14647	45.24	84	48.81	227	40.09
SK1G00072712	1	cluster11:24059788-24080911	21124	41.19	10	2901	47.36	9	18223	40.2	--	--	333	39.64
SK1G00070995	1	cluster11:2458070-2479252	21183	44.68	3	6580	50.59	2	14603	42.02	747	69.08	4777	43.98
SK1G00074223	1	cluster12:18763942-18785816	21875	42.35	11	4577	44.99	10	17298	41.65	59	42.37	--	--
SK1G00072710	1	cluster11:24014067-24037389	23323	43.39	15	5710	50	14	17613	41.24	--	--	313	36.42
SK1G00070470	1	cluster10:23797406-23822224	24819	39.07	38	9934	42.3	37	14885	36.92	195	68.21	7858	40.72
SK1G00074326	1	cluster12:19566327-19594270	27944	40.74	15	2355	60.25	14	25589	38.94	--	--	--	--
SK1G00074675	1	cluster12:22969922-23009141	39220	44.59	44	15465	54.83	42	23755	37.93	--	--	--	--

## Sheet: NMG
Gene ID	Variant number	Loci	Length(bp)	GC(%)	Exon number	Exon length(bp)	Exon GC(%)	Intron number	Intron length(bp)	Intron GC(%)	5'UTR length(bp)	5'UTR GC(%)	3'UTR length(bp)	3'UTR GC(%)
SK1G00000117	0	cluster1:761724-762218	495	67.47	1	495	67.47	--	--	--	--	--	--	--
SK1G00000257	0	cluster1:1755358-1761680	6323	36.06	5	1032	63.95	4	5291	30.62	--	--	--	--
SK1G00000444	0	cluster1:3235218-3240875	5658	39.31	8	1266	57.5	7	4392	34.06	--	--	--	--
SK1G00000507	0	cluster1:3688064-3688285	222	73.42	1	222	73.42	--	--	--	--	--	--	--
SK1G00000559	0	cluster1:4089997-4093971	3975	42.62	4	2913	44.7	3	1062	36.91	--	--	--	--
SK1G00000618	0	cluster1:4458515-4462747	4233	49	17	1215	68.72	16	3018	41.05	--	--	--	--
SK1G00000632	0	cluster1:4567419-4571519	4101	51.6	13	1185	67.76	12	2916	45.03	--	--	--	--
SK1G00000859	0	cluster1:6233265-6233555	291	67.7	1	291	67.7	--	--	--	--	--	--	--
SK1G00000893	0	cluster1:6474666-6479333	4668	48.31	13	1170	68.38	12	3498	41.6	--	--	--	--
SK1G00000944	0	cluster1:6929611-6935580	5970	40.72	10	2088	45.26	9	3882	38.28	--	--	--	--
SK1G00001408	0	cluster1:10411780-10413121	1342	68.03	2	1281	68.46	1	61	59.02	--	--	--	--
SK1G00001503	0	cluster1:11147978-11148169	192	69.79	1	192	69.79	--	--	--	--	--	--	--
SK1G00001526	0	cluster1:11311326-11315073	3748	41.28	4	579	58.72	3	3169	38.09	--	--	--	--
SK1G00001730	0	cluster1:12899753-12900651	899	67.74	3	798	68.8	2	101	59.41	--	--	--	--
SK1G00001818	0	cluster1:13477113-13477628	516	70.93	1	516	70.93	--	--	--	--	--	--	--
SK1G00001891	0	cluster1:13947057-13948075	1019	51.52	3	618	57.93	2	401	41.65	--	--	--	--
SK1G00002134	0	cluster1:15970230-15973635	3406	48.97	3	825	71.27	2	2581	41.84	--	--	--	--
SK1G00002263	0	cluster1:17100857-17107345	6489	44.35	16	1476	67.28	15	5013	37.6	--	--	--	--
SK1G00002615	0	cluster1:20210241-20212113	1873	36.73	2	642	40.65	1	1231	34.69	--	--	--	--
SK1G00002655	0	cluster1:20536404-20542101	5698	34.12	5	573	54.1	4	5125	31.88	--	--	--	--
SK1G00002698	0	cluster1:20916297-20916887	591	66.67	1	591	66.67	--	--	--	--	--	--	--
SK1G00002745	0	cluster1:21427543-21428294	752	68.88	3	675	68.89	2	77	68.83	--	--	--	--
SK1G00002886	0	cluster1:23034141-23035373	1233	59.21	1	1233	59.21	--	--	--	--	--	--	--
SK1G00002898	0	cluster1:23200980-23201591	612	73.37	1	612	73.37	--	--	--	--	--	--	--
SK1G00002936	0	cluster1:23665859-23669488	3630	45.92	10	546	65.57	9	3084	42.44	--	--	--	--
SK1G00003073	0	cluster1:25775020-25775190	171	36.84	1	171	36.84	--	--	--	--	--	--	--
SK1G00003074	0	cluster1:25775649-25775895	247	44.13	2	234	43.59	1	13	53.85	--	--	--	--
SK1G00003341	0	cluster1:29358805-29360521	1717	39.43	3	1305	41.46	2	412	33.01	--	--	--	--
SK1G00003362	0	cluster1:29891376-29891894	519	52.79	2	405	56.79	1	114	38.6	--	--	--	--
SK1G00003489	0	cluster1:31450173-31459584	9412	40.17	8	1449	60.04	7	7963	36.56	221	52.04	178	41.01
SK1G00003544	0	cluster1:32095363-32097387	2025	39.56	2	357	57.14	1	1668	35.79	--	--	--	--
SK1G00003581	0	cluster1:32406540-32406752	213	68.54	1	213	68.54	--	--	--	--	--	--	--
SK1G00003629	0	cluster1:32882005-32889215	7211	53.17	3	2775	72.43	2	4436	41.12	--	--	--	--
SK1G00003666	0	cluster1:33326438-33328825	2388	54.44	5	1449	64.6	4	939	38.76	--	--	--	--
SK1G00003914	0	cluster1:35370751-35377648	6898	51.33	5	3021	66.77	4	3877	39.31	--	--	--	--
SK1G00004002	0	cluster1:35987696-35989963	2268	54.94	2	1599	63.79	1	669	33.78	--	--	--	--
SK1G00004028	0	cluster1:36167741-36178095	10355	40.86	5	1200	61.5	4	9155	38.15	--	--	--	--
SK1G00004294	0	cluster1:38551871-38553424	1554	38.74	2	450	50.44	1	1104	33.97	--	--	--	--
SK1G00004368	0	cluster1:39118282-39118554	273	34.07	1	273	34.07	--	--	--	--	--	--	--
SK1G00004398	0	cluster1:39412489-39414476	1988	50.5	5	1110	63.42	4	878	34.17	--	--	--	--
SK1G00004411	0	cluster1:39495286-39498458	3173	35.96	4	780	59.1	3	2393	28.42	--	--	--	--
SK1G00004693	0	cluster1:41347814-41348512	699	60.09	1	699	60.09	--	--	--	--	--	--	--
SK1G00004707	0	cluster1:41442735-41452271	9537	40.46	15	3505	47.39	14	6032	36.44	--	--	277	42.24
SK1G00004738	0	cluster1:41666463-41668486	2024	39.67	3	834	48.92	2	1190	33.19	--	--	--	--
SK1G00004811	0	cluster1:42262528-42263385	858	68.41	1	858	68.41	--	--	--	--	--	--	--
SK1G00004840	0	cluster1:42562922-42564946	2025	40.64	3	669	49.93	2	1356	36.06	--	--	--	--
SK1G00004845	0	cluster1:42591604-42592849	1246	35.31	3	318	48.74	2	928	30.71	--	--	--	--
SK1G00004849	0	cluster1:42599336-42600256	921	47.01	2	648	48.77	1	273	42.86	--	--	--	--
SK1G00005034	0	cluster2:778665-782964	4300	51.21	2	756	71.69	1	3544	46.84	--	--	--	--
SK1G00005124	0	cluster2:1560008-1562063	2056	44.89	5	702	48.72	4	1354	42.91	--	--	--	--
SK1G00005210	0	cluster2:2101106-2103486	2381	48.68	7	828	62.56	6	1553	41.27	--	--	--	--
SK1G00005312	0	cluster2:2719243-2720577	1335	53.56	1	1335	53.56	--	--	--	--	--	--	--
SK1G00005340	0	cluster2:2857810-2859419	1610	43.35	2	240	64.58	1	1370	39.64	--	--	--	--
SK1G00005587	0	cluster2:4444526-4447729	3204	48.66	5	2112	56.39	4	1092	33.7	--	--	--	--
SK1G00005702	0	cluster2:5258956-5259191	236	55.51	2	189	57.67	1	47	46.81	--	--	--	--
SK1G00005734	0	cluster2:5532629-5533016	388	59.02	2	306	61.76	1	82	48.78	--	--	--	--
SK1G00006192	0	cluster2:9078857-9080245	1389	72.64	1	1389	72.64	--	--	--	--	--	--	--
SK1G00006398	0	cluster2:10707585-10711756	4172	52.8	6	1776	71.06	5	2396	39.27	--	--	--	--
SK1G00006408	0	cluster2:10818113-10819213	1101	59.22	2	714	68.49	1	387	42.12	--	--	--	--
SK1G00006567	0	cluster2:12259603-12260499	897	42.59	2	807	44.11	1	90	28.89	--	--	--	--
SK1G00006636	0	cluster2:12905034-12908774	3741	49.99	4	1992	67.17	3	1749	30.42	--	--	--	--
SK1G00006790	0	cluster2:14700480-14703696	3217	36.12	4	741	55.2	3	2476	30.41	--	--	--	--
SK1G00006881	0	cluster2:15748304-15749067	764	51.96	3	480	62.5	2	284	34.15	--	--	--	--
SK1G00007128	0	cluster2:19399770-19399877	108	46.3	1	108	46.3	--	--	--	--	--	--	--
SK1G00007174	0	cluster2:20266096-20266416	321	72.9	1	321	72.9	--	--	--	--	--	--	--
SK1G00007277	0	cluster2:21359190-21359513	324	72.22	1	324	72.22	--	--	--	--	--	--	--
SK1G00007324	0	cluster2:21869529-21873681	4153	56.42	18	2148	68.44	17	2005	43.54	--	--	--	--
SK1G00007336	0	cluster2:21952819-21953382	564	73.05	1	564	73.05	--	--	--	--	--	--	--
SK1G00007398	0	cluster2:22540591-22541253	663	66.82	1	663	66.82	--	--	--	--	--	--	--
SK1G00007444	0	cluster2:23051247-23052887	1641	50.7	3	663	69.83	2	978	37.73	--	--	--	--
SK1G00007517	0	cluster2:23770776-23771530	755	61.59	3	612	66.18	2	143	41.96	--	--	--	--
SK1G00007691	0	cluster2:25814886-25815146	261	64.37	1	261	64.37	--	--	--	--	--	--	--
SK1G00007708	0	cluster2:25905522-25910043	4522	49.25	7	1491	72.57	6	3031	37.78	--	--	--	--
SK1G00007994	0	cluster2:28204885-28205412	528	63.83	2	489	65.64	1	39	41.03	--	--	--	--
SK1G00008009	0	cluster2:28357074-28357511	438	71.69	1	438	71.69	--	--	--	--	--	--	--
SK1G00008218	0	cluster2:29819744-29820280	537	62.01	1	537	62.01	--	--	--	--	--	--	--
SK1G00008374	0	cluster2:31266129-31266359	231	48.48	1	231	48.48	--	--	--	--	--	--	--
SK1G00008381	0	cluster2:31336694-31337040	347	56.77	2	342	56.73	1	5	60	--	--	--	--
SK1G00008460	0	cluster2:31952099-31952827	729	71.19	1	729	71.19	--	--	--	--	--	--	--
SK1G00008624	0	cluster2:33195344-33195643	300	55.33	1	300	55.33	--	--	--	--	--	--	--
SK1G00008630	0	cluster2:33243881-33244910	1030	69.22	2	894	70.81	1	136	58.82	--	--	--	--
SK1G00008709	0	cluster2:33970152-33976389	6238	35.03	5	1236	46.12	4	5002	32.29	--	--	--	--
SK1G00008738	0	cluster2:34149535-34156194	6660	48.29	19	1905	61.31	18	4755	43.07	--	--	--	--
SK1G00008773	0	cluster2:34395920-34399446	3527	41.54	4	951	59.52	3	2576	34.9	--	--	--	--
SK1G00008784	0	cluster2:34464355-34471354	7000	43.8	17	2589	53.46	16	4411	38.13	--	--	--	--
SK1G00008808	0	cluster2:34621655-34622287	633	67.46	1	633	67.46	--	--	--	--	--	--	--
SK1G00008814	0	cluster2:34645327-34647272	1946	41.73	5	489	65.03	4	1457	33.91	--	--	--	--
SK1G00008816	0	cluster2:34650309-34653633	3325	49.14	5	1695	63.36	4	1630	34.36	--	--	--	--
SK1G00009174	0	cluster2:37022849-37025139	2291	37.06	3	507	53.65	2	1784	32.34	--	--	--	--
SK1G00009202	0	cluster2:37250487-37251816	1330	61.88	2	1110	67.21	1	220	35	--	--	--	--
SK1G00009285	0	cluster2:37835827-37837294	1468	46.93	3	651	58.83	2	817	37.45	--	--	--	--
SK1G00009416	0	cluster2:38853361-38853726	366	45.36	1	366	45.36	--	--	--	--	--	--	--
SK1G00009673	0	cluster3:1121675-1123414	1740	38.62	5	648	47.22	4	1092	33.52	--	--	--	--
SK1G00009745	0	cluster3:1629752-1630256	505	47.13	3	390	47.44	2	115	46.09	--	--	--	--
SK1G00009752	0	cluster3:1654193-1654697	505	47.13	3	390	47.44	2	115	46.09	--	--	--	--
SK1G00009754	0	cluster3:1658368-1662357	3990	36.57	5	495	46.46	4	3495	35.16	--	--	--	--
SK1G00009757	0	cluster3:1673358-1673767	410	34.39	2	162	39.51	1	248	31.05	--	--	--	--
SK1G00009762	0	cluster3:1703082-1703586	505	47.13	3	390	47.44	2	115	46.09	--	--	--	--
SK1G00009763	0	cluster3:1707257-1711199	3943	36.47	6	501	47.31	5	3442	34.89	--	--	--	--
SK1G00009886	0	cluster3:2554618-2557416	2799	48.98	6	2124	52.82	5	675	36.89	--	--	--	--
SK1G00009976	0	cluster3:3284657-3286947	2291	38.37	8	798	44.11	7	1493	35.3	--	--	--	--
SK1G00009980	0	cluster3:3302902-3307688	4787	42.57	12	1734	51.21	11	3053	37.67	--	--	--	--
SK1G00009999	0	cluster3:3449745-3450563	819	40.66	3	336	48.81	2	483	34.99	--	--	--	--
SK1G00010000	0	cluster3:3453056-3453605	550	35.82	3	261	37.93	2	289	33.91	--	--	--	--
SK1G00010001	0	cluster3:3453837-3454208	372	62.63	1	372	62.63	--	--	--	--	--	--	--
SK1G00010027	0	cluster3:3630130-3630601	472	31.57	2	291	36.08	1	181	24.31	--	--	--	--
SK1G00010395	0	cluster3:6165498-6169667	4170	49.54	5	1227	63.98	4	2943	43.53	--	--	--	--
SK1G00010804	0	cluster3:9628917-9631014	2098	61.2	2	1032	72.19	1	1066	50.56	--	--	--	--
SK1G00010898	0	cluster3:10408103-10408348	246	73.58	1	246	73.58	--	--	--	--	--	--	--
SK1G00011039	0	cluster3:11901266-11907860	6595	39.92	5	2160	39.44	4	4435	40.16	--	--	--	--
SK1G00011094	0	cluster3:12686781-12695142	8362	40.18	9	771	67.32	8	7591	37.43	--	--	--	--
SK1G00011535	0	cluster3:16358617-16359150	534	42.13	3	291	46.39	2	243	37.04	--	--	--	--
SK1G00011536	0	cluster3:16360011-16367205	7195	43.93	8	3246	56.04	7	3949	33.98	--	--	--	--
SK1G00011582	0	cluster3:16892386-16893570	1185	67.17	1	1185	67.17	--	--	--	--	--	--	--
SK1G00011583	0	cluster3:16893815-16896093	2279	60.6	4	1515	72.08	3	764	37.83	--	--	--	--
SK1G00011754	0	cluster3:18377155-18378638	1484	46.23	4	639	58.22	3	845	37.16	--	--	--	--
SK1G00012042	0	cluster3:22628508-22635535	7028	43.27	5	783	57.73	4	6245	41.46	--	--	--	--
SK1G00012112	0	cluster3:24193689-24195430	1742	43	3	696	56.75	2	1046	33.84	--	--	--	--
SK1G00012224	0	cluster3:25864601-25865536	936	31.62	3	284	34.86	2	652	30.21	92	27.17	--	--
SK1G00012242	0	cluster3:26141813-26143056	1244	57.23	2	765	71.63	1	479	34.24	--	--	--	--
SK1G00012261	0	cluster3:26326614-26328626	2013	43.77	2	1317	46.39	1	696	38.79	--	--	--	--
SK1G00012394	0	cluster3:27792957-27796658	3702	36.63	4	276	44.93	3	3426	35.96	--	--	--	--
SK1G00012481	0	cluster3:28794042-28795859	1818	47.69	3	708	63.7	2	1110	37.48	--	--	--	--
SK1G00012542	0	cluster3:29418485-29419910	1426	63.04	2	1248	65.46	1	178	46.07	--	--	--	--
SK1G00012580	0	cluster3:29921425-29924373	2949	51.61	6	1545	63.82	5	1404	38.18	--	--	--	--
SK1G00012635	0	cluster3:30382805-30383098	294	40.82	1	294	40.82	--	--	--	--	--	--	--
SK1G00012698	0	cluster3:30969952-30970203	252	65.87	1	252	65.87	--	--	--	--	--	--	--
SK1G00012794	0	cluster3:31980151-31980516	366	45.63	1	366	45.63	--	--	--	--	--	--	--
SK1G00013032	0	cluster3:33909406-33911882	2477	44.57	4	552	65.76	3	1925	38.49	--	--	--	--
SK1G00013067	0	cluster3:34240775-34245912	5138	53.99	6	3162	63.47	5	1976	38.82	--	--	--	--
SK1G00013363	0	cluster3:36528547-36528741	195	50.26	1	195	50.26	--	--	--	--	--	--	--
SK1G00013403	0	cluster3:36736557-36737036	480	67.92	1	480	67.92	--	--	--	--	--	--	--
SK1G00013723	0	cluster4:521085-522944	1860	35.48	2	528	48.86	1	1332	30.18	--	--	--	--
SK1G00013750	0	cluster4:709405-712273	2869	35.94	2	1305	38.01	1	1564	34.21	--	--	--	--
SK1G00013762	0	cluster4:853287-858980	5694	46.03	5	2967	52.88	4	2727	38.58	--	--	--	--
SK1G00013820	0	cluster4:1372315-1373698	1384	42.27	2	672	59.08	1	712	26.4	--	--	--	--
SK1G00013832	0	cluster4:1596551-1598965	2415	44.68	4	1341	51.08	3	1074	36.69	--	--	--	--
SK1G00014136	0	cluster4:6332776-6333584	809	43.02	3	477	45.7	2	332	39.16	--	--	--	--
SK1G00014173	0	cluster4:6732757-6734206	1450	59.86	3	1014	69.53	2	436	37.39	--	--	--	--
SK1G00014174	0	cluster4:6741173-6745084	3912	48.42	8	1029	65.69	7	2883	42.25	--	--	--	--
SK1G00014176	0	cluster4:6754644-6755437	794	39.42	2	711	40.65	1	83	28.92	--	--	--	--
SK1G00014255	0	cluster4:8251026-8251392	367	65.4	2	360	65.83	1	7	42.86	--	--	--	--
SK1G00014344	0	cluster4:10810257-10816326	6070	46.66	19	1452	67.29	18	4618	40.17	--	--	--	--
SK1G00014398	0	cluster4:12322229-12322500	272	44.85	2	239	45.61	1	33	39.39	29	37.93	--	--
SK1G00014410	0	cluster4:12397724-12403340	5617	41.39	8	1491	61.3	7	4126	34.2	--	--	--	--
SK1G00014521	0	cluster4:13910675-13910947	273	59.34	1	273	59.34	--	--	--	--	--	--	--
SK1G00014523	0	cluster4:13983501-13995681	12181	44.99	7	4746	48.1	6	7435	43	--	--	--	--
SK1G00014563	0	cluster4:14647098-14649729	2632	39.86	4	396	47.22	3	2236	38.55	--	--	--	--
SK1G00014575	0	cluster4:14777723-14779223	1501	43.84	2	843	51.48	1	658	34.04	--	--	--	--
SK1G00014703	0	cluster4:16338669-16345516	6848	43.98	5	2961	54.2	4	3887	36.2	--	--	--	--
SK1G00014824	0	cluster4:18028651-18029187	537	65.55	1	537	65.55	--	--	--	--	--	--	--
SK1G00014850	0	cluster4:18265777-18268876	3100	36.13	4	369	62.06	3	2731	32.63	--	--	--	--
SK1G00014873	0	cluster4:18589359-18591142	1784	40.64	2	1116	47.4	1	668	29.34	--	--	--	--
SK1G00015128	0	cluster4:21335356-21335724	369	68.02	1	369	68.02	--	--	--	--	--	--	--
SK1G00015232	0	cluster4:22124651-22126427	1777	46.03	2	324	65.74	1	1453	41.64	--	--	--	--
SK1G00015336	0	cluster4:23033643-23034494	852	67.61	1	852	67.61	--	--	--	--	--	--	--
SK1G00015391	0	cluster4:23488633-23489280	648	72.84	1	648	72.84	--	--	--	--	--	--	--
SK1G00015471	0	cluster4:24068248-24071732	3485	39.43	7	1632	44.55	6	1853	34.92	--	--	--	--
SK1G00015601	0	cluster4:24945114-24947681	2568	74.03	1	2568	74.03	--	--	--	--	--	--	--
SK1G00015825	0	cluster4:26488575-26491921	3347	49.12	2	1452	52.82	1	1895	46.28	--	--	--	--
SK1G00015828	0	cluster4:26518701-26519582	882	61.68	2	801	62.3	1	81	55.56	--	--	--	--
SK1G00016020	0	cluster4:27904502-27913729	9228	60.87	43	6006	66.33	42	3222	50.68	--	--	--	--
SK1G00016049	0	cluster4:28181704-28187223	5520	45.74	7	2538	53.47	6	2982	39.17	--	--	--	--
SK1G00016068	0	cluster4:28336653-28348450	11798	42.35	9	1749	64.61	8	10049	38.48	105	46.67	--	--
SK1G00016277	0	cluster4:30125395-30126058	664	71.39	2	633	71.56	1	31	67.74	--	--	--	--
SK1G00016460	0	cluster4:31636097-31638096	2000	36.3	3	522	54.21	2	1478	29.97	--	--	--	--
SK1G00016482	0	cluster4:31801432-31804041	2610	38.93	5	942	48.62	4	1668	33.45	--	--	--	--
SK1G00016512	0	cluster4:32029979-32035464	5486	39.25	8	1992	49.25	7	3494	33.54	--	--	--	--
SK1G00016527	0	cluster4:32155580-32156659	1080	70.09	1	1080	70.09	--	--	--	--	--	--	--
SK1G00016640	0	cluster4:33003673-33004599	927	63.11	1	927	63.11	--	--	--	--	--	--	--
SK1G00016641	0	cluster4:33008293-33010437	2145	64.34	1	2145	64.34	--	--	--	--	--	--	--
SK1G00016825	0	cluster4:34481176-34481823	648	70.22	1	648	70.22	--	--	--	--	--	--	--
SK1G00016827	0	cluster4:34484256-34485191	936	42.63	2	336	67.26	1	600	28.83	--	--	--	--
SK1G00016828	0	cluster4:34491232-34495684	4453	47.36	2	519	55.88	1	3934	46.24	--	--	--	--
SK1G00016847	0	cluster4:34616177-34616782	606	66.83	1	606	66.83	--	--	--	--	--	--	--
SK1G00016878	0	cluster4:34847433-34848458	1026	42.01	1	1026	42.01	--	--	--	--	--	--	--
SK1G00016903	0	cluster4:35015708-35017085	1378	47.61	5	402	54.98	4	976	44.57	--	--	--	--
SK1G00017076	0	cluster4:36186444-36187516	1073	67.57	2	1005	69.15	1	68	44.12	--	--	--	--
SK1G00017079	0	cluster7:8745-11598	2854	38.33	3	255	45.88	2	2599	37.59	--	--	--	--
SK1G00017095	0	cluster7:112705-113079	375	44	2	360	43.61	1	15	53.33	--	--	--	--
SK1G00017452	0	cluster7:2842050-2844995	2946	40.97	4	555	65.05	3	2391	35.38	--	--	--	--
SK1G00017623	0	cluster7:4725537-4728482	2946	52	3	1179	63.02	2	1767	44.65	--	--	--	--
SK1G00017629	0	cluster7:4773958-4775284	1327	43.63	4	486	54.94	3	841	37.1	--	--	--	--
SK1G00017818	0	cluster7:6648135-6648738	604	30.96	3	222	35.59	2	382	28.27	--	--	--	--
SK1G00017874	0	cluster7:7151376-7153474	2099	49.07	6	1059	62.98	5	1040	34.9	--	--	--	--
SK1G00017895	0	cluster7:7327789-7328721	933	38.05	2	282	43.97	1	651	35.48	--	--	--	--
SK1G00017902	0	cluster7:7384117-7385418	1302	67.13	1	1302	67.13	--	--	--	--	--	--	--
SK1G00018117	0	cluster7:10839345-10845174	5830	35.56	2	669	47.68	1	5161	33.99	--	--	--	--
SK1G00018341	0	cluster7:14884055-14884618	564	45.04	1	564	45.04	--	--	--	--	--	--	--
SK1G00018461	0	cluster7:16466927-16472724	5798	49.84	26	1419	66.1	25	4379	44.58	--	--	--	--
SK1G00018551	0	cluster7:17523848-17524896	1049	61.3	4	690	68.12	3	359	48.19	--	--	--	--
SK1G00018742	0	cluster7:19303985-19305658	1674	53.7	3	1041	65.61	2	633	34.12	--	--	--	--
SK1G00018950	0	cluster7:21317375-21318613	1239	48.67	2	627	57.26	1	612	39.87	--	--	--	--
SK1G00019004	0	cluster7:21731720-21732261	542	69.19	2	513	69.4	1	29	65.52	--	--	--	--
SK1G00019005	0	cluster7:21732310-21732807	498	70.28	1	498	70.28	--	--	--	--	--	--	--
SK1G00019139	0	cluster7:22820366-22820861	496	39.31	3	255	40.78	2	241	37.76	--	--	--	--
SK1G00019197	0	cluster7:23401094-23403718	2625	49.1	1	2625	49.1	--	--	--	--	--	--	--
SK1G00019262	0	cluster7:23819344-23820171	828	56.76	2	621	62.48	1	207	39.61	--	--	--	--
SK1G00019926	0	cluster7:28924488-28926056	1569	38.43	3	318	46.54	2	1251	36.37	--	--	--	--
SK1G00020060	0	cluster7:29849552-29851681	2130	58.08	1	2130	58.08	--	--	--	--	--	--	--
SK1G00020517	0	cluster6:2267030-2267398	369	69.65	1	369	69.65	--	--	--	--	--	--	--
SK1G00020518	0	cluster6:2268366-2270749	2384	35.95	6	750	43.6	5	1634	32.44	--	--	--	--
SK1G00020758	0	cluster6:3913464-3914290	827	52.24	2	432	68.98	1	395	33.92	--	--	--	--
SK1G00020770	0	cluster6:3994364-4001302	6939	41.94	13	1836	53.32	12	5103	37.84	--	--	--	--
SK1G00020889	0	cluster6:4888428-4890074	1647	70.19	1	1647	70.19	--	--	--	--	--	--	--
SK1G00020940	0	cluster6:5270976-5271452	477	69.18	1	477	69.18	--	--	--	--	--	--	--
SK1G00020941	0	cluster6:5275722-5276498	777	71.94	1	777	71.94	--	--	--	--	--	--	--
SK1G00020977	0	cluster6:5543981-5544319	339	71.39	1	339	71.39	--	--	--	--	--	--	--
SK1G00021350	0	cluster6:8654260-8654571	312	70.51	1	312	70.51	--	--	--	--	--	--	--
SK1G00021601	0	cluster6:11534874-11536403	1530	40.13	3	375	50.4	2	1155	36.8	--	--	--	--
SK1G00021628	0	cluster6:11954345-11958598	4254	36.98	5	504	60.12	4	3750	33.87	--	--	--	--
SK1G00021686	0	cluster6:12689882-12690028	147	45.58	1	147	45.58	--	--	--	--	--	--	--
SK1G00021694	0	cluster6:12818860-12819223	364	60.44	2	225	65.33	1	139	52.52	--	--	--	--
SK1G00021740	0	cluster6:13450523-13451439	917	48.09	5	756	51.46	4	161	32.3	--	--	--	--
SK1G00021749	0	cluster6:13650476-13651862	1387	44.77	4	456	62.72	3	931	35.98	--	--	--	--
SK1G00021750	0	cluster6:13651967-13652496	530	60.19	2	441	62.59	1	89	48.31	--	--	--	--
SK1G00021783	0	cluster6:14245826-14246647	822	50	1	822	50	--	--	--	--	--	--	--
SK1G00021792	0	cluster6:14363498-14364667	1170	40.51	3	474	52.32	2	696	32.47	--	--	--	--
SK1G00021822	0	cluster6:14922008-14922355	348	58.05	1	348	58.05	--	--	--	--	--	--	--
SK1G00021859	0	cluster6:16199353-16199565	213	46.48	1	213	46.48	--	--	--	--	--	--	--
SK1G00021863	0	cluster6:16237046-16244452	7407	56.15	32	4011	65.22	31	3396	45.44	--	--	--	--
SK1G00021874	0	cluster6:16604000-16604890	891	38.61	3	549	43.53	2	342	30.7	--	--	--	--
SK1G00021899	0	cluster6:16968942-16971288	2347	41.37	4	435	58.39	3	1912	37.5	--	--	--	--
SK1G00021901	0	cluster6:16976334-16976823	490	55.92	2	411	59.37	1	79	37.97	--	--	--	--
SK1G00021925	0	cluster6:17510340-17514365	4026	45.6	10	1758	58.99	9	2268	35.23	--	--	--	--
SK1G00021965	0	cluster6:18134114-18135800	1687	36.34	3	437	46.68	2	1250	32.72	47	34.04	--	--
SK1G00022073	0	cluster6:19833982-19838123	4142	33.78	3	390	61.03	2	3752	30.94	--	--	--	--
SK1G00022167	0	cluster6:20983269-20983481	213	35.21	1	213	35.21	--	--	--	--	--	--	--
SK1G00022177	0	cluster6:21048289-21054733	6445	58.93	22	4128	66.72	21	2317	45.06	--	--	--	--
SK1G00022218	0	cluster6:21517887-21520580	2694	56.35	14	870	66.78	13	1824	51.37	--	--	--	--
SK1G00022266	0	cluster6:21971344-21987836	16493	46.19	42	3852	65.06	41	12641	40.44	--	--	--	--
SK1G00022345	0	cluster6:22966496-22966858	363	45.73	1	363	45.73	--	--	--	--	--	--	--
SK1G00022384	0	cluster6:23518485-23519360	876	42.47	4	393	54.2	3	483	32.92	--	--	--	--
SK1G00022493	0	cluster6:24507497-24510714	3218	44.16	3	933	67.63	2	2285	34.57	--	--	--	--
SK1G00022503	0	cluster6:24684061-24690093	6033	50.02	11	2076	63.92	10	3957	42.73	--	--	--	--
SK1G00022506	0	cluster6:24699136-24699609	474	71.73	1	474	71.73	--	--	--	--	--	--	--
SK1G00022509	0	cluster6:24707845-24710322	2478	40.52	3	1917	40.43	2	561	40.82	--	--	--	--
SK1G00022555	0	cluster6:25178202-25178753	552	68.48	1	552	68.48	--	--	--	--	--	--	--
SK1G00022693	0	cluster6:26449094-26452113	3020	49.21	15	918	61.98	14	2102	43.63	--	--	--	--
SK1G00022766	0	cluster6:27031362-27037855	6494	38.6	4	1629	45.73	3	4865	36.22	748	50.27	683	39.53
SK1G00022830	0	cluster6:27567190-27568872	1683	69.16	2	1596	70.68	1	87	41.38	--	--	--	--
SK1G00022863	0	cluster6:27826050-27826792	743	65.95	2	735	65.99	1	8	62.5	--	--	--	--
SK1G00022924	0	cluster6:28261384-28262654	1271	37.29	3	408	43.14	2	863	34.53	--	--	--	--
SK1G00022973	0	cluster6:28655085-28662537	7453	56.81	44	3621	64.84	43	3832	49.22	--	--	--	--
SK1G00023668	0	cluster8:2358067-2365242	7176	39.28	8	1878	47.44	7	5298	36.39	--	--	--	--
SK1G00023691	0	cluster8:2497837-2505588	7752	49.83	4	2517	44.26	3	5235	52.51	--	--	--	--
SK1G00023867	0	cluster8:3894798-3895832	1035	70.53	1	1035	70.53	--	--	--	--	--	--	--
SK1G00023952	0	cluster8:4504892-4509113	4222	43.94	5	1203	67.75	4	3019	34.45	--	--	--	--
SK1G00023977	0	cluster8:4690671-4694014	3344	36.3	3	288	44.44	2	3056	35.54	--	--	--	--
SK1G00024321	0	cluster8:7048266-7049900	1635	56.64	8	873	67.93	7	762	43.7	--	--	--	--
SK1G00024456	0	cluster8:8210468-8211172	705	62.98	1	705	62.98	--	--	--	--	--	--	--
SK1G00024488	0	cluster8:8562905-8567036	4132	38.24	9	1917	44.6	8	2215	32.73	--	--	--	--
SK1G00024672	0	cluster8:10210297-10211443	1147	69.83	4	1035	69.95	3	112	68.75	--	--	--	--
SK1G00024835	0	cluster8:12098078-12106154	8077	41.67	14	1374	67.69	13	6703	36.34	--	--	--	--
SK1G00024925	0	cluster8:13610356-13610852	497	39.24	2	201	46.77	1	296	34.12	--	--	--	--
SK1G00024976	0	cluster8:14185384-14185927	544	43.2	2	456	44.08	1	88	38.64	--	--	--	--
SK1G00025013	0	cluster8:14782201-14783607	1407	39.3	4	1215	41.15	3	192	27.6	--	--	--	--
SK1G00025015	0	cluster8:14784493-14785441	949	39.09	2	534	44.57	1	415	32.05	--	--	--	--
SK1G00025054	0	cluster8:15424048-15424557	510	34.51	3	336	38.1	2	174	27.59	--	--	--	--
SK1G00025088	0	cluster8:15974230-15982659	8430	45.24	5	1128	53.9	4	7302	43.91	--	--	--	--
SK1G00025099	0	cluster8:16116509-16117735	1227	46.86	2	564	62.23	1	663	33.79	--	--	--	--
SK1G00025119	0	cluster8:16355154-16355822	669	62.78	1	669	62.78	--	--	--	--	--	--	--
SK1G00025219	0	cluster8:18332094-18336625	4532	39.32	8	1404	48.65	7	3128	35.13	--	--	--	--
SK1G00025247	0	cluster8:18986482-18989823	3342	47.58	4	801	63.3	3	2541	42.62	--	--	--	--
SK1G00025356	0	cluster8:21057874-21061620	3747	35.92	4	333	54.95	3	3414	34.07	--	--	--	--
SK1G00025369	0	cluster8:21301105-21303105	2001	42.38	4	597	62.14	3	1404	33.97	--	--	--	--
SK1G00025385	0	cluster8:21507276-21513760	6485	37.9	10	2391	44.17	9	4094	34.25	--	--	--	--
SK1G00025401	0	cluster8:21786048-21786587	540	69.81	1	540	69.81	--	--	--	--	--	--	--
SK1G00025402	0	cluster8:21810665-21812703	2039	44.24	2	708	66.24	1	1331	32.53	--	--	--	--
SK1G00025552	0	cluster8:23464774-23465784	1011	69.14	1	1011	69.14	--	--	--	--	--	--	--
SK1G00025581	0	cluster8:23947273-23948345	1073	38.3	3	209	47.37	2	864	36.11	62	51.61	--	--
SK1G00025644	0	cluster8:24590267-24590980	714	40.62	4	324	49.38	3	390	33.33	--	--	--	--
SK1G00025652	0	cluster8:24747454-24752479	5026	41.7	3	603	52.57	2	4423	40.22	--	--	--	--
SK1G00025681	0	cluster8:25093131-25095049	1919	69.83	2	1857	70.38	1	62	53.23	--	--	--	--
SK1G00025789	0	cluster8:26088134-26089197	1064	36.47	2	208	41.35	1	856	35.28	58	36.21	--	--
SK1G00025838	0	cluster8:26476208-26479390	3183	40.43	3	735	66.39	2	2448	32.64	--	--	--	--
SK1G00025858	0	cluster8:26614942-26615517	576	68.23	2	555	68.11	1	21	71.43	--	--	--	--
SK1G00025859	0	cluster8:26615536-26615831	296	48.99	2	285	49.12	1	11	45.45	--	--	--	--
SK1G00026176	0	cluster8:29210790-29211605	816	74.51	1	816	74.51	--	--	--	--	--	--	--
SK1G00026181	0	cluster8:29296963-29305122	8160	45.45	8	4245	49.21	7	3915	41.38	--	--	--	--
SK1G00026571	0	cluster9:1910702-1919549	8848	41.01	3	3696	47.48	2	5152	36.37	--	--	--	--
SK1G00026913	0	cluster9:4460361-4461684	1324	61.78	2	1167	66.24	1	157	28.66	--	--	--	--
SK1G00026954	0	cluster9:4763369-4764452	1084	52.12	4	732	58.33	3	352	39.2	--	--	--	--
SK1G00026955	0	cluster9:4764528-4764854	327	63	1	327	63	--	--	--	--	--	--	--
SK1G00027065	0	cluster9:5731036-5731575	540	75.19	1	540	75.19	--	--	--	--	--	--	--
SK1G00027168	0	cluster9:6794118-6796829	2712	36.28	3	477	50.1	2	2235	33.33	--	--	--	--
SK1G00027193	0	cluster9:7122838-7123425	588	45.58	1	588	45.58	--	--	--	--	--	--	--
SK1G00027201	0	cluster9:7195986-7196360	375	62.93	1	375	62.93	--	--	--	--	--	--	--
SK1G00027279	0	cluster9:7785992-7789755	3764	37.7	6	480	38.75	5	3284	37.55	--	--	--	--
SK1G00027558	0	cluster9:10254145-10255593	1449	37.2	3	297	50.17	2	1152	33.85	--	--	--	--
SK1G00027758	0	cluster9:13487161-13487499	339	52.51	1	339	52.51	--	--	--	--	--	--	--
SK1G00027864	0	cluster9:15294987-15297502	2516	38.95	4	609	58.95	3	1907	32.56	--	--	--	--
SK1G00027900	0	cluster9:16053641-16054048	408	65.93	1	408	65.93	--	--	--	--	--	--	--
SK1G00027925	0	cluster9:16292746-16297489	4744	40.91	7	1353	60.46	6	3391	33.12	--	--	--	--
SK1G00027936	0	cluster9:16507333-16508013	681	69.6	1	681	69.6	--	--	--	--	--	--	--
SK1G00028304	0	cluster9:22319130-22319395	266	64.66	2	255	65.49	1	11	45.45	--	--	--	--
SK1G00028325	0	cluster9:22483637-22483894	258	70.54	1	258	70.54	--	--	--	--	--	--	--
SK1G00028417	0	cluster9:24285062-24285849	788	56.98	2	696	59.48	1	92	38.04	--	--	--	--
SK1G00028676	0	cluster9:27326515-27329245	2731	43.1	7	1236	49.35	6	1495	37.93	--	--	--	--
SK1G00028903	0	cluster9:29368014-29372358	4345	48.65	4	2109	65.72	3	2236	32.56	--	--	--	--
SK1G00029037	0	cluster9:30431901-30434798	2898	45.34	3	2241	47.48	2	657	38.05	--	--	--	--
SK1G00029103	0	cluster5:325448-326133	686	70.26	2	681	70.34	1	5	60	--	--	--	--
SK1G00029104	0	cluster5:328347-330459	2113	46.1	2	936	66.56	1	1177	29.82	--	--	--	--
SK1G00029121	0	cluster5:405262-406482	1221	41.11	4	339	49.85	3	882	37.76	--	--	--	--
SK1G00029255	0	cluster5:2175850-2183304	7455	47.63	16	1803	69.44	15	5652	40.68	--	--	--	--
SK1G00029266	0	cluster5:2268031-2272876	4846	36.26	4	453	64.02	3	4393	33.39	--	--	--	--
SK1G00029271	0	cluster5:2301307-2305275	3969	47.75	10	786	67.68	9	3183	42.82	--	--	--	--
SK1G00029319	0	cluster5:2864257-2865181	925	43.35	2	879	43.46	1	46	41.3	--	--	--	--
SK1G00029325	0	cluster5:2914949-2915791	843	65.24	1	843	65.24	--	--	--	--	--	--	--
SK1G00029361	0	cluster5:3224471-3225004	534	52.25	1	534	52.25	--	--	--	--	--	--	--
SK1G00029380	0	cluster5:3371409-3371720	312	74.04	1	312	74.04	--	--	--	--	--	--	--
SK1G00029412	0	cluster5:3601983-3608793	6811	39.14	7	1743	48.36	6	5068	35.97	--	--	--	--
SK1G00029449	0	cluster5:3983296-3985017	1722	70.85	1	1722	70.85	--	--	--	--	--	--	--
SK1G00029514	0	cluster5:4764061-4766078	2018	43.26	3	744	52.28	2	1274	37.99	--	--	--	--
SK1G00029736	0	cluster5:6957279-6957661	383	52.48	2	312	56.41	1	71	35.21	--	--	--	--
SK1G00029801	0	cluster5:7527019-7527931	913	34.61	2	216	48.15	1	697	30.42	--	--	--	--
SK1G00029860	0	cluster5:8182071-8183611	1541	42.89	3	501	52.69	2	1040	38.17	--	--	--	--
SK1G00030010	0	cluster5:9683698-9688783	5086	45.4	5	2979	53.61	4	2107	33.79	--	--	--	--
SK1G00030046	0	cluster5:10039979-10043618	3640	45.14	3	2457	53.4	2	1183	27.98	--	--	--	--
SK1G00030074	0	cluster5:10432350-10433995	1646	62.45	2	1326	70.36	1	320	29.69	--	--	--	--
SK1G00030251	0	cluster5:12730495-12731642	1148	62.11	2	858	69.93	1	290	38.97	--	--	--	--
SK1G00030317	0	cluster5:13524063-13528956	4894	40.25	9	1446	49.86	8	3448	36.22	--	--	--	--
SK1G00030379	0	cluster5:14438688-14443241	4554	33.4	6	489	46.01	5	4065	31.88	--	--	--	--
SK1G00030473	0	cluster5:16469886-16470536	651	61.6	1	651	61.6	--	--	--	--	--	--	--
SK1G00030501	0	cluster5:16818376-16819557	1182	67.34	1	1182	67.34	--	--	--	--	--	--	--
SK1G00030572	0	cluster5:18857987-18861155	3169	40.58	5	1233	50.45	4	1936	34.3	--	--	--	--
SK1G00030633	0	cluster5:20744502-20750266	5765	42.06	9	921	65.04	8	4844	37.7	--	--	--	--
SK1G00030653	0	cluster5:21070125-21073937	3813	39.08	8	2526	42.52	7	1287	32.32	--	--	--	--
SK1G00030679	0	cluster5:21516829-21520580	3752	34.06	3	189	44.44	2	3563	33.51	--	--	--	--
SK1G00030757	0	cluster5:22962754-22963461	708	63.84	1	708	63.84	--	--	--	--	--	--	--
SK1G00030758	0	cluster5:22970551-22971249	699	71.39	1	699	71.39	--	--	--	--	--	--	--
SK1G00030770	0	cluster5:23153554-23153724	171	36.84	1	171	36.84	--	--	--	--	--	--	--
SK1G00030959	0	cluster5:25250796-25258764	7969	51.2	24	2862	67.92	23	5107	41.82	--	--	--	--
SK1G00031016	0	cluster5:25952389-25953704	1316	39.29	2	693	46.32	1	623	31.46	--	--	--	--
SK1G00031111	0	cluster5:27145245-27147699	2455	52.79	11	798	70.55	10	1657	44.24	--	--	--	--
SK1G00031388	0	cluster5:29876069-29876524	456	67.11	1	456	67.11	--	--	--	--	--	--	--
SK1G00031395	0	cluster5:29920435-29922638	2204	46.82	5	1293	55.22	4	911	34.91	--	--	--	--
SK1G00031400	0	cluster5:29928611-29928904	294	66.33	1	294	66.33	--	--	--	--	--	--	--
SK1G00031586	0	cluster5:31190906-31195277	4372	36.57	7	807	53.04	6	3565	32.85	--	--	--	--
SK1G00031621	0	cluster5:31506265-31506513	249	68.67	1	249	68.67	--	--	--	--	--	--	--
SK1G00031830	0	cluster10:57714-62316	4603	30.61	3	438	46.35	2	4165	28.96	--	--	--	--
SK1G00031860	0	cluster10:204546-204947	402	54.73	1	402	54.73	--	--	--	--	--	--	--
SK1G00031868	0	cluster10:262975-265008	2034	46.46	4	1299	51.66	3	735	37.28	--	--	--	--
SK1G00032029	0	cluster10:1299184-1301081	1898	55.37	3	1086	66.11	2	812	41.01	--	--	--	--
SK1G00032086	0	cluster10:1684204-1686782	2579	30.13	6	696	46.12	5	1883	24.22	--	--	--	--
SK1G00032273	0	cluster10:3009867-3012288	2422	44.67	4	1347	51.22	3	1075	36.47	--	--	--	--
SK1G00032521	0	cluster10:5179491-5180921	1431	38.09	2	192	55.73	1	1239	35.35	--	--	--	--
SK1G00032547	0	cluster10:5510924-5511447	524	42.75	2	417	44.6	1	107	35.51	--	--	--	--
SK1G00032640	0	cluster10:6512614-6514763	2150	58.05	4	1317	68.49	3	833	41.54	--	--	--	--
SK1G00032665	0	cluster10:6825828-6830007	4180	34.5	5	1041	51.2	4	3139	28.96	--	--	--	--
SK1G00033181	0	cluster10:15359294-15376987	17694	42.16	20	2847	59.99	19	14847	38.74	--	--	--	--
SK1G00033182	0	cluster10:15377081-15381886	4806	46.98	3	3288	49.91	2	1518	40.65	--	--	--	--
SK1G00033183	0	cluster10:15404943-15406138	1196	48.75	3	867	52.6	2	329	38.6	--	--	--	--
SK1G00033359	0	cluster10:17716683-17718414	1732	36.72	4	386	42.23	3	1346	35.14	17	29.41	--	--
SK1G00033378	0	cluster10:17871431-17874713	3283	44.29	2	624	69.55	1	2659	38.36	--	--	--	--
SK1G00033441	0	cluster10:18527315-18528626	1312	55.49	4	1209	56.99	3	103	37.86	--	--	--	--
SK1G00033529	0	cluster10:19346979-19348639	1661	41.36	3	1077	44.2	2	584	36.13	--	--	--	--
SK1G00033545	0	cluster10:19490340-19493129	2790	37.92	4	1683	42.13	3	1107	31.53	--	--	--	--
SK1G00033548	0	cluster10:19500677-19503794	3118	48.97	6	2496	52.4	5	622	35.21	--	--	--	--
SK1G00033629	0	cluster10:20567026-20571693	4668	40.9	8	1581	57.37	7	3087	32.46	--	--	--	--
SK1G00033741	0	cluster10:21625516-21626144	629	67.41	4	561	66.49	3	68	75	--	--	--	--
SK1G00033830	0	cluster10:22484113-22485258	1146	45.2	2	813	50.06	1	333	33.33	--	--	--	--
SK1G00033891	0	cluster10:23089295-23096139	6845	55.56	25	2700	68.19	24	4145	47.33	--	--	--	--
SK1G00033917	0	cluster10:23373009-23375488	2480	48.87	3	834	66.19	2	1646	40.1	--	--	--	--
SK1G00033996	0	cluster10:24074056-24075744	1689	48.73	2	837	67.03	1	852	30.75	--	--	--	--
SK1G00034108	0	cluster10:24937958-24939264	1307	55.39	3	690	69.57	2	617	39.55	--	--	--	--
SK1G00034316	0	cluster11:540613-541002	390	57.18	1	390	57.18	--	--	--	--	--	--	--
SK1G00034331	0	cluster11:627697-628191	495	63.23	1	495	63.23	--	--	--	--	--	--	--
SK1G00034344	0	cluster11:1046366-1046771	406	59.11	3	297	67.34	2	109	36.7	--	--	--	--
SK1G00034488	0	cluster11:1970030-1970739	710	66.34	5	603	65.67	4	107	70.09	--	--	--	--
SK1G00034551	0	cluster11:2410280-2417012	6733	44.54	11	1914	62.8	10	4819	37.29	--	--	--	--
SK1G00034553	0	cluster11:2417410-2418024	615	67.8	1	615	67.8	--	--	--	--	--	--	--
SK1G00034615	0	cluster11:2799063-2799812	750	64.8	1	750	64.8	--	--	--	--	--	--	--
SK1G00034637	0	cluster11:2980626-2983162	2537	36.3	5	471	46.71	4	2066	33.93	--	--	--	--
SK1G00034707	0	cluster11:3559954-3560390	437	48.05	2	288	59.03	1	149	26.85	--	--	--	--
SK1G00034756	0	cluster11:4025478-4026583	1106	37.43	3	378	42.59	2	728	34.75	--	--	--	--
SK1G00034763	0	cluster11:4060188-4060691	504	50.4	1	504	50.4	--	--	--	--	--	--	--
SK1G00035006	0	cluster11:5977770-5979761	1992	38.2	2	204	50	1	1788	36.86	--	--	--	--
SK1G00035161	0	cluster11:7404511-7410026	5516	47.77	16	1185	70.97	15	4331	41.42	--	--	--	--
SK1G00035207	0	cluster11:7842481-7857057	14577	42.46	25	2007	67.12	24	12570	38.52	--	--	--	--
SK1G00035210	0	cluster11:7904717-7908293	3577	39.89	3	810	61.36	2	2767	33.61	--	--	--	--
SK1G00035254	0	cluster11:8265487-8269009	3523	36.11	3	2166	38.55	2	1357	32.2	--	--	--	--
SK1G00035279	0	cluster11:8473162-8474271	1110	50.9	2	1023	51.32	1	87	45.98	--	--	--	--
SK1G00035302	0	cluster11:8676657-8676911	255	70.59	1	255	70.59	--	--	--	--	--	--	--
SK1G00035304	0	cluster11:8680061-8682594	2534	46.09	3	1899	47.13	2	635	42.99	--	--	--	--
SK1G00035305	0	cluster11:8684203-8684505	303	44.55	1	303	44.55	--	--	--	--	--	--	--
SK1G00035311	0	cluster11:8818192-8819386	1195	54.64	4	930	58.39	3	265	41.51	--	--	--	--
SK1G00035328	0	cluster11:8982997-8986012	3016	45.16	3	963	61.47	2	2053	37.51	--	--	--	--
SK1G00035332	0	cluster11:9020068-9023251	3184	38.69	7	1011	53.02	6	2173	32.03	--	--	--	--
SK1G00035366	0	cluster11:9393069-9395160	2092	50.43	5	1197	60.15	4	895	37.43	--	--	--	--
SK1G00035457	0	cluster11:10346423-10348477	2055	54.01	2	1152	66.67	1	903	37.87	--	--	--	--
SK1G00035468	0	cluster11:10459531-10460466	936	44.23	3	573	47.64	2	363	38.84	--	--	--	--
SK1G00035486	0	cluster11:10609902-10610672	771	51.36	2	285	67.37	1	486	41.98	--	--	--	--
SK1G00035521	0	cluster11:10914111-10915049	939	37.17	2	354	44.35	1	585	32.82	--	--	--	--
SK1G00035591	0	cluster11:12019650-12021451	1802	61.65	2	1406	70.2	1	396	31.31	80	51.25	15	20
SK1G00035645	0	cluster11:12747879-12756582	8704	45.01	6	3060	50.49	5	5644	42.04	--	--	--	--
SK1G00035653	0	cluster11:12913173-12914571	1399	34.6	3	216	46.76	2	1183	32.38	--	--	--	--
SK1G00035688	0	cluster11:13359574-13361856	2283	39.38	2	630	50.16	1	1653	35.27	--	--	--	--
SK1G00035692	0	cluster11:13475553-13482672	7120	44.71	3	1521	57.99	2	5599	41.1	--	--	--	--
SK1G00035714	0	cluster11:13668969-13669556	588	69.39	1	588	69.39	--	--	--	--	--	--	--
SK1G00035729	0	cluster11:13850735-13852652	1918	44.11	4	741	59.92	3	1177	34.15	--	--	--	--
SK1G00035791	0	cluster11:15015172-15016750	1579	43.89	4	765	47.84	3	814	40.17	--	--	--	--
SK1G00035815	0	cluster11:15455049-15457125	2077	40.35	4	594	49.33	3	1483	36.75	--	--	--	--
SK1G00035817	0	cluster11:15587981-15598061	10081	44.31	15	1224	65.93	14	8857	41.32	--	--	--	--
SK1G00035825	0	cluster11:15829851-15840711	10861	47.99	22	2931	69.02	21	7930	40.21	--	--	--	--
SK1G00035843	0	cluster11:16078738-16079019	282	47.52	1	282	47.52	--	--	--	--	--	--	--
SK1G00035856	0	cluster11:16183426-16187326	3901	37.4	3	477	47.59	2	3424	35.98	--	--	--	--
SK1G00035875	0	cluster11:16437644-16438904	1261	44.65	3	411	54.74	2	850	39.76	--	--	--	--
SK1G00035909	0	cluster11:17331092-17331992	901	62.49	2	852	61.97	1	49	71.43	--	--	--	--
SK1G00035948	0	cluster11:17946580-17953404	6825	57.39	26	3630	67.47	25	3195	45.95	--	--	--	--
SK1G00036041	0	cluster11:19396935-19407488	10554	42.2	17	1083	69.53	16	9471	39.08	--	--	--	--
SK1G00036069	0	cluster11:19732671-19736270	3600	34.83	3	780	44.1	2	2820	32.27	--	--	--	--
SK1G00036086	0	cluster11:19972683-19976339	3657	36.31	6	414	50	5	3243	34.57	--	--	--	--
SK1G00036171	0	cluster11:21069029-21069724	696	32.33	2	246	43.5	1	450	26.22	--	--	--	--
SK1G00036226	0	cluster11:21937141-21937734	594	71.72	1	594	71.72	--	--	--	--	--	--	--
SK1G00036373	0	cluster11:23617855-23620870	3016	39.95	6	1017	48.48	5	1999	35.62	--	--	--	--
SK1G00036383	0	cluster11:23726710-23727491	782	50	2	252	63.1	1	530	43.77	--	--	--	--
SK1G00036392	0	cluster11:23856439-23859029	2591	58.16	16	1482	66.73	15	1109	46.71	--	--	--	--
SK1G00036422	0	cluster11:24261383-24268503	7121	44.01	8	1398	49.21	7	5723	42.74	--	--	--	--
SK1G00036430	0	cluster11:24317236-24320575	3340	49.52	2	657	59.51	1	2683	47.07	--	--	--	--
SK1G00036487	0	cluster11:25328848-25335293	6446	35.63	6	603	46.43	5	5843	34.52	--	--	--	--
SK1G00036491	0	cluster11:25357103-25357342	240	69.17	1	240	69.17	--	--	--	--	--	--	--
SK1G00036647	0	cluster12:2357946-2358506	561	66.13	1	561	66.13	--	--	--	--	--	--	--
SK1G00037025	0	cluster12:8120922-8126163	5242	56.73	3	1518	71.81	2	3724	50.59	--	--	--	--
SK1G00037052	0	cluster12:8497625-8498134	510	66.27	1	510	66.27	--	--	--	--	--	--	--
SK1G00037061	0	cluster12:8635042-8636574	1533	35.23	2	267	48.31	1	1266	32.46	--	--	--	--
SK1G00037088	0	cluster12:9056273-9058054	1782	40.24	3	948	45.68	2	834	34.05	--	--	--	--
SK1G00037493	0	cluster12:13771248-13772094	847	46.52	2	468	55.77	1	379	35.09	--	--	--	--
SK1G00037523	0	cluster12:14158035-14166052	8018	48.64	28	2964	60.63	27	5054	41.61	--	--	--	--
SK1G00037620	0	cluster12:14960553-14967356	6804	34.19	6	783	46.49	5	6021	32.59	--	--	--	--
SK1G00037743	0	cluster12:16084339-16084827	489	70.76	1	489	70.76	--	--	--	--	--	--	--
SK1G00037751	0	cluster12:16221067-16221324	258	68.99	1	258	68.99	--	--	--	--	--	--	--
SK1G00037752	0	cluster12:16225172-16226116	945	68.78	1	945	68.78	--	--	--	--	--	--	--
SK1G00037859	0	cluster12:17153813-17156397	2585	56.02	7	1173	67.09	6	1412	46.81	--	--	--	--
SK1G00037869	0	cluster12:17285228-17285458	231	69.7	1	231	69.7	--	--	--	--	--	--	--
SK1G00037921	0	cluster12:17722447-17723416	970	40.21	4	288	50	3	682	36.07	--	--	--	--
SK1G00038573	0	cluster12:23266266-23266700	435	52.18	1	435	52.18	--	--	--	--	--	--	--
SK1G00038576	0	cluster12:23283650-23286542	2893	40.96	4	483	51.97	3	2410	38.76	--	--	--	--
SK1G00038675	0	cluster12:23941421-23942220	800	58.63	2	720	61.39	1	80	33.75	--	--	--	--
SK1G00038712	0	fragment19:94917-96354	1438	39.22	2	444	57.88	1	994	30.89	--	--	--	--
SK1G00038739	0	fragment19:280821-284298	3478	51.64	2	360	56.67	1	3118	51.06	--	--	--	--
SK1G00038847	0	fragment21:14949-20025	5077	42.8	9	2139	57.04	8	2938	32.44	--	--	--	--
SK1G00038971	0	fragment24:497604-497834	231	62.77	1	231	62.77	--	--	--	--	--	--	--
SK1G00039080	0	fragment27:43294-43995	702	40.03	2	591	40.78	1	111	36.04	--	--	--	--
SK1G00039149	0	fragment39:54807-55265	459	44.66	1	459	44.66	--	--	--	--	--	--	--
SK1G00039150	0	fragment39:56614-57177	564	45.04	1	564	45.04	--	--	--	--	--	--	--
SK1G00039189	0	fragment26:25147-25386	240	50.83	1	240	50.83	--	--	--	--	--	--	--
SK1G00039197	0	fragment26:47081-47632	552	43.84	1	552	43.84	--	--	--	--	--	--	--
SK1G00039204	0	fragment34:15290-15544	255	44.31	1	255	44.31	--	--	--	--	--	--	--
SK1G00039205	0	fragment34:15837-16295	459	49.67	1	459	49.67	--	--	--	--	--	--	--
SK1G00039229	0	fragment28:6823-7062	240	50.83	1	240	50.83	--	--	--	--	--	--	--
SK1G00039270	0	fragment36:35040-35312	273	35.16	1	273	35.16	--	--	--	--	--	--	--
SK1G00039272	0	fragment42:20365-20916	552	43.84	1	552	43.84	--	--	--	--	--	--	--
SK1G00039282	0	fragment40:30773-31324	552	43.84	1	552	43.84	--	--	--	--	--	--	--
SK1G00039296	0	fragment35:9827-10390	564	45.04	1	564	45.04	--	--	--	--	--	--	--
SK1G00039297	0	cluster1:1062-4258	3197	41.73	10	1753	46.09	9	1444	36.43	81	71.6	280	40.36
SK1G00039298	0	cluster1:4333-7974	3642	44.65	13	1969	51.04	12	1673	37.12	85	74.12	411	40.39
SK1G00039299	0	cluster1:8174-8861	688	63.81	2	594	67.34	1	94	41.49	--	--	--	--
SK1G00039300	0	cluster1:10405-22157	11753	38.2	26	4555	43.18	25	7198	35.05	339	50.44	367	37.87
SK1G00039301	0	cluster1:24190-31880	7691	44.58	7	6804	45.58	6	887	36.98	--	--	6270	44.43
SK1G00039302	0	cluster1:32579-35145	2567	50.49	5	618	60.36	4	1949	47.36	--	--	--	--
SK1G00039303	0	cluster1:36794-37345	552	76.99	1	552	76.99	--	--	--	--	--	--	--
SK1G00039304	0	cluster1:39120-43417	4298	51.79	6	2565	63.24	5	1733	34.85	--	--	--	--
SK1G00039305	0	cluster1:44914-47858	2945	44.41	6	1356	51.7	5	1589	38.2	--	--	306	49.35
SK1G00039306	0	cluster1:50095-59885	9791	41.04	13	2371	53.61	12	7420	37.02	64	67.19	--	--
SK1G00039307	0	cluster1:60437-61098	662	73.87	2	651	74.35	1	11	45.45	--	--	--	--
SK1G00039308	0	cluster1:64763-71278	6516	41.82	15	4357	45.19	14	2159	35.02	10	40	--	--
SK1G00039309	0	cluster1:72758-73879	1122	70.14	1	1122	70.14	--	--	--	--	--	--	--
SK1G00039310	0	cluster1:74522-80238	5717	44.22	6	3696	47.86	5	2021	37.56	--	--	342	43.57
SK1G00039311	0	cluster1:88101-89960	1860	68.71	1	1860	68.71	--	--	--	--	--	--	--
SK1G00039313	0	cluster1:111204-112792	1589	60.92	2	657	73.82	1	932	51.82	--	--	--	--
SK1G00039314	0	cluster1:113934-117310	3377	43.32	5	1625	49.72	4	1752	37.39	156	64.74	335	44.48
SK1G00039315	0	cluster1:118201-121436	3236	39.43	6	630	56.03	5	2606	35.42	--	--	--	--
SK1G00039316	0	cluster1:129557-131079	1523	48.26	3	573	69.11	2	950	35.68	--	--	--	--
SK1G00039317	0	cluster1:137660-139461	1802	42.79	2	1360	48.9	1	442	23.98	80	50	731	33.93
SK1G00039318	0	cluster1:139961-140065	105	33.33	1	105	33.33	--	--	--	--	--	--	--
SK1G00039319	0	cluster1:147082-149008	1927	42.14	4	507	56.02	3	1420	37.18	--	--	--	--
SK1G00039320	0	cluster1:149360-152108	2749	39.11	7	705	45.39	6	2044	36.94	--	--	--	--
SK1G00039322	0	cluster1:163336-177147	13812	44.19	3	1726	56.26	2	12086	42.46	360	40.28	244	29.1
SK1G00039323	0	cluster1:179027-181228	2202	44.6	5	899	53.62	4	1303	38.37	88	76.14	271	39.85
SK1G00039324	0	cluster1:181698-184393	2696	44.73	5	1656	50.36	4	1040	35.77	--	--	--	--
SK1G00039325	0	cluster1:185142-186831	1690	44.56	4	309	63.11	3	1381	40.41	--	--	--	--
SK1G00039326	0	cluster1:187641-188564	924	53.35	2	498	68.47	1	426	35.68	--	--	--	--
SK1G00039327	0	cluster1:189810-192911	3102	42.01	7	1179	47.84	6	1923	38.43	95	71.58	199	36.68
SK1G00039328	0	cluster1:193298-194441	1144	65.12	3	993	69.18	2	151	38.41	--	--	--	--
SK1G00039329	0	cluster1:195845-202663	6819	46.94	4	4915	50.11	3	1904	38.76	2556	56.1	1768	40.44
SK1G00039330	0	cluster1:205131-213056	7926	40.02	11	2304	46.7	10	5622	37.28	401	65.09	760	41.97
SK1G00039333	0	cluster1:224790-229416	4627	42.92	14	2330	50	13	2297	35.74	--	--	389	35.99
SK1G00039334	0	cluster1:236160-236417	258	66.28	1	258	66.28	--	--	--	--	--	--	--
SK1G00039335	0	cluster1:239590-244754	5165	48.89	6	1929	67.44	5	3236	37.82	--	--	--	--
SK1G00039336	0	cluster1:245825-248038	2214	39.52	11	1104	42.93	10	1110	36.13	--	--	--	--
SK1G00039337	0	cluster1:250062-254418	4357	39.66	12	2083	45.66	11	2274	34.17	316	57.28	603	40.3
SK1G00039338	0	cluster1:269617-276069	6453	39.49	13	2658	46.91	12	3795	34.28	50	68	454	40.97
SK1G00039339	0	cluster1:276733-279561	2829	54.93	4	2505	57.17	3	324	37.65	--	--	--	--
SK1G00039340	0	cluster1:280292-280483	192	29.69	1	192	29.69	--	--	--	--	--	--	--
SK1G00039341	0	cluster1:287995-290089	2095	43.39	2	510	64.12	1	1585	36.72	--	--	--	--
SK1G00039342	0	cluster1:292097-293157	1061	47.03	6	495	60	5	566	35.69	--	--	--	--
SK1G00039343	0	cluster1:294151-301886	7736	38.92	21	2315	45.62	20	5421	36.06	47	61.7	288	38.19
SK1G00039344	0	cluster1:303238-303474	237	60.34	2	207	60.87	1	30	56.67	--	--	--	--
SK1G00039345	0	cluster1:305593-308132	2540	50.16	2	2358	51.57	1	182	31.87	--	--	--	--
