# Supplementary material for: Multiomics analysis of the molecular and single-cell responses of rice after deep-space flight on Chang'e-5
Source: Research Square preprint supplement (doi:10.21203/rs.3.rs-7211908/v1), 2025-08-22
Supplement: Supplementary file 9 [file df43894c59a361d60839f766.xlsx]

## Sheet: Sheet1
Supplementary Data 7. Genes affecting the differentiation fate of parenchymal-5 to mesophyll-2.
Branch	GeneID	Gene_cluster	P_value	FDR	Symbol	Description	KEGG_A_class	KEGG_B_class	Pathway	K_ID	GO Component	GO Function	GO Process
State 1,2 -vs- State 1,3	SK1G00039322	2	3.5275811073375e-57	6.16017e-55	Sb03g046810	CAH69262.1 TPA: class III peroxidase 20 precursor [Oryza sativa Japonica Group]	Metabolism;Metabolism;Metabolism	Global and overview maps;Global and overview maps;Biosynthesis of other secondary metabolites	ko01100//Metabolic pathways;ko01110//Biosynthesis of secondary metabolites;ko00940//Phenylpropanoid biosynthesis	K00430;K00430;K00430	-	GO:0004601//peroxidase activity;GO:0020037//heme binding	GO:0006979//response to oxidative stress;GO:0055114//oxidation-reduction process
State 1,2 -vs- State 1,3	SK1G00039343	2	9.67115822871553e-31	8.00822e-29	PSD2	XP_015622516.1 phosphatidylserine decarboxylase proenzyme 2 [Oryza sativa Japonica Group]	Metabolism;Metabolism;Metabolism	Global and overview maps;Global and overview maps;Lipid metabolism	ko01100//Metabolic pathways;ko01110//Biosynthesis of secondary metabolites;ko00564//Glycerophospholipid metabolism	K01613;K01613;K01613	-	GO:0004609//phosphatidylserine decarboxylase activity;GO:0005509//calcium ion binding	GO:0008654//phospholipid biosynthetic process
State 1,2 -vs- State 1,3	SK1G00039354	1	1.28023163823367e-18	5.8879e-17	CFM9	BAD87108.1 protein kinase-like [Oryza sativa Japonica Group]	-	-	-	-	GO:0005737//cytoplasm	GO:0003723//RNA binding	GO:0008150//biological_process;GO:0048544//recognition of pollen
State 1,2 -vs- State 1,3	SK1G00039360	4	6.07473130151769e-13	1.86498e-11	RER4	EEC72190.1 hypothetical protein OsI_05266 [Oryza sativa Indica Group]	-	-	-	-	-	-	GO:0009236//cobalamin biosynthetic process
State 1,2 -vs- State 1,3	SK1G00039362	4	1.1474899658701e-08	2.47117e-07	Os01g0957000	EEC72189.1 hypothetical protein OsI_05264 [Oryza sativa Indica Group]	Metabolism;Metabolism	Global and overview maps;Metabolism of cofactors and vitamins	ko01100//Metabolic pathways;ko00760//Nicotinate and nicotinamide metabolism	K00858;K00858	-	GO:0003951//NAD+ kinase activity;GO:0004623//phospholipase A2 activity;GO:0016301//kinase activity	GO:0006644//phospholipid metabolic process;GO:0006741//NADP biosynthetic process;GO:0050482//arachidonic acid secretion
State 1,2 -vs- State 1,3	SK1G00039375	5	1.06067706440381e-12	3.20612e-11	CML23	EAY77275.1 hypothetical protein OsI_05249 [Oryza sativa Indica Group]	Organismal Systems	Environmental adaptation	ko04626//Plant-pathogen interaction	K13448	-	GO:0004553//hydrolase activity, hydrolyzing O-glycosyl compounds;GO:0005509//calcium ion binding;GO:0005515//protein binding;GO:0009055//electron carrier activity	GO:0000272//polysaccharide catabolic process;GO:0055114//oxidation-reduction process
State 1,2 -vs- State 1,3	SK1G00039379	4	8.6172760634011e-10	2.06224e-08	LRP1	EEC72181.1 hypothetical protein OsI_05244 [Oryza sativa Indica Group]	-	-	-	-	-	-	-
State 1,2 -vs- State 1,3	SK1G00039380	4	2.13599385143887e-21	1.13817e-19	--	EEE56020.1 hypothetical protein OsJ_04797 [Oryza sativa Japonica Group]	-	-	-	-	GO:0005680//anaphase-promoting complex	GO:0008270//zinc ion binding;GO:0046872//metal ion binding;GO:0061630//ubiquitin protein ligase activity;GO:0097602//cullin family protein binding	GO:0031145//anaphase-promoting complex-dependent proteasomal ubiquitin-dependent protein catabolic process
State 1,2 -vs- State 1,3	SK1G00039394	2	1.48677012717026e-08	3.17085e-07	RR4	XP_015641147.1 two-component response regulator ORR4 [Oryza sativa Japonica Group]	Environmental Information Processing	Signal transduction	ko04075//Plant hormone signal transduction	K14492	GO:0016020//membrane	GO:0000156//phosphorelay response regulator activity;GO:0003677//DNA binding;GO:0003700//transcription factor activity, sequence-specific DNA binding;GO:0004673//protein histidine kinase activity;GO:0005524//ATP binding	GO:0000160//phosphorelay signal transduction system;GO:0006355//regulation of transcription, DNA-templated;GO:0006796//phosphate-containing compound metabolic process;GO:0006808//regulation of nitrogen utilization;GO:0030436//asexual sporulation;GO:0042173//regulation of sporulation resulting in formation of a cellular spore
State 1,2 -vs- State 1,3	SK1G00039419	2	6.04791826290594e-117	3.23243e-114	--	XP_025878262.1 cysteine-rich and transmembrane domain-containing protein WIH1-like [Oryza sativa Japonica Group]	-	-	-	-	-	-	-
State 1,2 -vs- State 1,3	SK1G00039428	2	1.26812022283962e-60	2.45785e-58	BANGLUC	XP_015651097.1 glucan endo-1,3-beta-glucosidase GV [Oryza sativa Japonica Group]	-	-	-	-	-	GO:0004553//hydrolase activity, hydrolyzing O-glycosyl compounds	GO:0005975//carbohydrate metabolic process
State 1,2 -vs- State 1,3	SK1G00039448	2	1.98606717975872e-26	1.3737e-24	VIT_06s0061g00120	EAY77172.1 hypothetical protein OsI_05142 [Oryza sativa Indica Group]	-	-	-	-	-	GO:0004553//hydrolase activity, hydrolyzing O-glycosyl compounds	GO:0005975//carbohydrate metabolic process
State 1,2 -vs- State 1,3	SK1G00039466	4	2.5200959770267e-09	5.80643e-08	PSB28	XP_015650407.1 photosystem II reaction center PSB28 protein, chloroplastic [Oryza sativa Japonica Group]	Metabolism	Energy metabolism	ko00195//Photosynthesis	K08903	GO:0009523//photosystem II;GO:0009538//photosystem I reaction center;GO:0009654//photosystem II oxygen evolving complex;GO:0016020//membrane	GO:0003674//molecular_function	GO:0015979//photosynthesis
State 1,2 -vs- State 1,3	SK1G00039494	1	8.77058810131455e-18	3.78681e-16	LD	XP_015620702.1 homeobox protein LUMINIDEPENDENS [Oryza sativa Japonica Group]	-	-	-	-	GO:0009523//photosystem II;GO:0009654//photosystem II oxygen evolving complex;GO:0019898//extrinsic component of membrane	GO:0003677//DNA binding;GO:0005509//calcium ion binding;GO:0009036//Type II site-specific deoxyribonuclease activity	GO:0009307//DNA restriction-modification system;GO:0015979//photosynthesis
State 1,2 -vs- State 1,3	SK1G00039498	2	1.21347158522175e-30	1.00246e-28	GST3	XP_015621197.1 glutathione S-transferase 3 [Oryza sativa Japonica Group]	Metabolism;Metabolism	Global and overview maps;Metabolism of other amino acids	ko01100//Metabolic pathways;ko00480//Glutathione metabolism	K00799;K00799	-	GO:0005515//protein binding;GO:0016034//maleylacetoacetate isomerase activity	GO:0006559//L-phenylalanine catabolic process;GO:0006572//tyrosine catabolic process;GO:0006749//glutathione metabolic process
State 1,2 -vs- State 1,3	SK1G00039550	2	2.23875687183537e-22	1.25552e-20	pitC	XP_015636207.1 phosphatidylinositol transfer protein 3 [Oryza sativa Japonica Group]	-	-	-	-	-	-	-
State 1,2 -vs- State 1,3	SK1G00039553	2	2.95956481856982e-11	8.04924e-10	tal	XP_015617463.1 uncharacterized protein LOC4327239 [Oryza sativa Japonica Group]	Metabolism;Metabolism;Metabolism;Metabolism;Metabolism	Global and overview maps;Global and overview maps;Global and overview maps;Global and overview maps;Carbohydrate metabolism	ko01100//Metabolic pathways;ko01110//Biosynthesis of secondary metabolites;ko01200//Carbon metabolism;ko01230//Biosynthesis of amino acids;ko00030//Pentose phosphate pathway	K00616;K00616;K00616;K00616;K00616	-	GO:0004801//sedoheptulose-7-phosphate:D-glyceraldehyde-3-phosphate glyceronetransferase activity;GO:0016832//aldehyde-lyase activity	GO:0005975//carbohydrate metabolic process;GO:0006098//pentose-phosphate shunt
State 1,2 -vs- State 1,3	SK1G00039572	4	1.35348024412528e-46	1.78817e-44	RPL27	EEC72062.1 hypothetical protein OsI_04988 [Oryza sativa Indica Group]	Genetic Information Processing	Translation	ko03010//Ribosome	K02899	GO:0000315//organellar large ribosomal subunit;GO:0005840//ribosome;GO:0022625//cytosolic large ribosomal subunit	GO:0003735//structural constituent of ribosome	GO:0006412//translation
State 1,2 -vs- State 1,3	SK1G00039581	5	2.81838436992664e-12	8.21641e-11	--	EAY77026.1 hypothetical protein OsI_04981 [Oryza sativa Indica Group]	-	-	-	-	-	-	-
State 1,2 -vs- State 1,3	SK1G00039601	2	1.14184558568597e-33	1.0249e-31	Y-2	EAY77002.1 hypothetical protein OsI_04958 [Oryza sativa Indica Group]	-	-	-	-	-	-	-
State 1,2 -vs- State 1,3	SK1G00039611	5	2.58297592593888e-15	9.51091e-14	SUMO1	P55857.1 RecName: Full=Small ubiquitin-related modifier 1; Short=OsSUMO1; AltName: Full=Ubiquitin-like protein SMT3 [Oryza sativa Japonica Group]	Genetic Information Processing	Translation	ko03013//RNA transport	K12160	-	GO:0005515//protein binding	-
State 1,2 -vs- State 1,3	SK1G00039624	5	4.41634565486094e-31	3.70039e-29	RBG4	XP_015622053.1 glycine-rich RNA-binding protein 4, mitochondrial [Oryza sativa Japonica Group]	-	-	-	-	-	GO:0003676//nucleic acid binding	GO:0008380//RNA splicing
State 1,2 -vs- State 1,3	SK1G00039625	2	2.16696620400232e-67	5.02893e-65	SBP1	XP_015621286.1 selenium-binding protein 1 [Oryza sativa Japonica Group]	Metabolism;Metabolism	Global and overview maps;Energy metabolism	ko01100//Metabolic pathways;ko00920//Sulfur metabolism	K17285;K17285	-	GO:0008430//selenium binding	-
State 1,2 -vs- State 1,3	SK1G00039636	2	1.87519053864332e-22	1.05667e-20	--	EAY76948.1 hypothetical protein OsI_04906 [Oryza sativa Indica Group]	-	-	-	-	-	-	-
State 1,2 -vs- State 1,3	SK1G00039682	4	5.15438218045551e-18	2.2756e-16	RGLG2	XP_015616475.1 E3 ubiquitin-protein ligase RGLG2 [Oryza sativa Japonica Group]	-	-	-	-	-	GO:0046872//metal ion binding	-
State 1,2 -vs- State 1,3	SK1G00039703	2	5.97397284212289e-25	3.79697e-23	AIRP2	XP_015621835.1 E3 ubiquitin-protein ligase AIRP2 [Oryza sativa Japonica Group]	-	-	-	-	GO:0000109//nucleotide-excision repair complex;GO:0005675//holo TFIIH complex	GO:0004693//cyclin-dependent protein serine/threonine kinase activity;GO:0008270//zinc ion binding;GO:0046872//metal ion binding	GO:0006289//nucleotide-excision repair;GO:0006352//DNA-templated transcription, initiation
State 1,2 -vs- State 1,3	SK1G00000507	1	6.45903621066566e-23	3.74126e-21	--	-	-	-	-	-	-	-	-
State 1,2 -vs- State 1,3	SK1G00039804	3	2.25359956346575e-15	8.33289e-14	MLO1	XP_015621746.1 MLO-like protein 1 [Oryza sativa Japonica Group]	-	-	-	-	GO:0016021//integral component of membrane	-	GO:0006952//defense response
State 1,2 -vs- State 1,3	SK1G00039824	5	4.42210879021819e-15	1.60154e-13	--	XP_015622357.1 protein WVD2-like 7 [Oryza sativa Japonica Group]	-	-	-	-	-	-	-
State 1,2 -vs- State 1,3	SK1G00039832	2	5.34389541743072e-09	1.18931e-07	NAC048	EAY76735.1 hypothetical protein OsI_04690 [Oryza sativa Indica Group]	-	-	-	-	-	-	-
State 1,2 -vs- State 1,3	SK1G00039857	5	1.0527870116185e-14	3.68789e-13	PME51	EAY76707.1 hypothetical protein OsI_04662 [Oryza sativa Indica Group]	-	-	-	-	-	GO:0004857//enzyme inhibitor activity;GO:0030599//pectinesterase activity	GO:0042545//cell wall modification
State 1,2 -vs- State 1,3	SK1G00039858	3	1.57319132779577e-11	4.35933e-10	GUX1	EEC71899.1 hypothetical protein OsI_04661 [Oryza sativa Indica Group]	-	-	-	-	-	GO:0016757//transferase activity, transferring glycosyl groups	-
State 1,2 -vs- State 1,3	SK1G00039869	1	3.05398455738187e-17	1.27641e-15	AAP5	EAY76697.1 hypothetical protein OsI_04651 [Oryza sativa Indica Group]	-	-	-	-	GO:0005887//integral component of plasma membrane	GO:0015173//aromatic amino acid transmembrane transporter activity	GO:0003333//amino acid transmembrane transport;GO:0015801//aromatic amino acid transport
State 1,2 -vs- State 1,3	SK1G00039909	5	9.13117628311107e-10	2.17931e-08	NPF5.10	OEL37935.1 Protein NRT1/ PTR FAMILY 5.10 [Dichanthelium oligosanthes]	-	-	-	-	GO:0016020//membrane	GO:0015333//peptide:proton symporter activity;GO:0022857//transmembrane transporter activity	GO:0015833//peptide transport;GO:0055085//transmembrane transport
State 1,2 -vs- State 1,3	SK1G00039923	3	2.13877168665282e-09	4.97659e-08	--	XP_015621168.2 TLC domain-containing protein 2 [Oryza sativa Japonica Group]	-	-	-	-	GO:0016021//integral component of membrane	-	-
State 1,2 -vs- State 1,3	SK1G00000685	4	1.29195668089571e-08	2.77044e-07	sbt3	XP_025881016.1 uncharacterized protein LOC4324925 [Oryza sativa Japonica Group]	-	-	-	-	-	GO:0008236//serine-type peptidase activity	GO:0006508//proteolysis;GO:0009306//protein secretion
State 1,2 -vs- State 1,3	SK1G00039947	5	2.03005582720402e-08	4.26505e-07	HTR2	EOY31042.1 Histone superfamily protein [Theobroma cacao]	-	-	-	-	GO:0071821//FANCM-MHF complex	GO:0003677//DNA binding	-
State 1,2 -vs- State 1,3	SK1G00039959	4	1.09222202141431e-40	1.16399e-38	--	BAB63813.1 putative harpin inducing protein [Oryza sativa Japonica Group]	-	-	-	-	-	-	-
State 1,2 -vs- State 1,3	SK1G00039960	4	2.45478304007788e-22	1.37231e-20	--	EAY76592.1 hypothetical protein OsI_04540 [Oryza sativa Indica Group]	-	-	-	-	-	-	-
State 1,2 -vs- State 1,3	SK1G00039982	4	1.57886679162029e-09	3.71545e-08	At2g27500	KAF2953433.1 hypothetical protein DAI22_01g407900 [Oryza sativa Japonica Group]	-	-	-	-	-	GO:0004553//hydrolase activity, hydrolyzing O-glycosyl compounds	GO:0005975//carbohydrate metabolic process
State 1,2 -vs- State 1,3	SK1G00039985	4	1.51249946794512e-41	1.66729e-39	CHIT3	PHT74588.1 Acidic endochitinase [Capsicum annuum]	Metabolism;Metabolism	Global and overview maps;Carbohydrate metabolism	ko01100//Metabolic pathways;ko00520//Amino sugar and nucleotide sugar metabolism	K01183;K01183	-	-	GO:0005975//carbohydrate metabolic process
State 1,2 -vs- State 1,3	SK1G00040003	1	1.13566127519446e-17	4.86761e-16	Os01g0857700	EAY76553.1 hypothetical protein OsI_04498 [Oryza sativa Indica Group]	Genetic Information Processing	Transcription	ko03040//Spliceosome	K12873	GO:0005634//nucleus	-	-
State 1,2 -vs- State 1,3	SK1G00040050	4	5.53333112287694e-18	2.43681e-16	OFUT19	EEC71817.1 hypothetical protein OsI_04456 [Oryza sativa Indica Group]	-	-	-	-	-	-	-
State 1,2 -vs- State 1,3	SK1G00040069	4	4.56240269323232e-20	2.26994e-18	AKR4C10	ACS92968.1 aldo-keto reductase [Oryza sativa Indica Group]	Metabolism;Metabolism;Metabolism;Metabolism;Metabolism	Global and overview maps;Global and overview maps;Carbohydrate metabolism;Lipid metabolism;Carbohydrate metabolism	ko01100//Metabolic pathways;ko01110//Biosynthesis of secondary metabolites;ko00010//Glycolysis / Gluconeogenesis;ko00561//Glycerolipid metabolism;ko00040//Pentose and glucuronate interconversions	K00002;K00002;K00002;K00002;K00002	-	GO:0047834//D-threo-aldose 1-dehydrogenase activity	-
State 1,2 -vs- State 1,3	SK1G00040078	1	2.53543058275525e-17	1.0622e-15	Os01g0846300	XP_015621342.1 probable protein phosphatase 2C 9 [Oryza sativa Japonica Group]	Environmental Information Processing;Environmental Information Processing	Signal transduction;Signal transduction	ko04075//Plant hormone signal transduction;ko04016//MAPK signaling pathway - plant	K14497;K14497	-	GO:0016791//phosphatase activity	-
State 1,2 -vs- State 1,3	SK1G00040114	3	1.92558337648497e-08	4.06493e-07	HSP70-4	XP_015618966.1 probable mediator of RNA polymerase II transcription subunit 37c [Oryza sativa Japonica Group]	Genetic Information Processing;Genetic Information Processing;Cellular Processes	Folding, sorting and degradation;Transcription;Transport and catabolism	ko04141//Protein processing in endoplasmic reticulum;ko03040//Spliceosome;ko04144//Endocytosis	K03283;K03283;K03283	-	GO:0004856//xylulokinase activity;GO:0005515//protein binding;GO:0005524//ATP binding;GO:0016773//phosphotransferase activity, alcohol group as acceptor;GO:0016787//hydrolase activity;GO:0016887//ATPase activity;GO:0051082//unfolded protein binding	GO:0005975//carbohydrate metabolic process;GO:0005997//xylulose metabolic process;GO:0006457//protein folding;GO:0006950//response to stress;GO:0008360//regulation of cell shape;GO:0042732//D-xylose metabolic process;GO:0043093//FtsZ-dependent cytokinesis
State 1,2 -vs- State 1,3	SK1G00040116	5	1.26148726966855e-34	1.17103e-32	UBC7	XP_015618097.1 ubiquitin-conjugating enzyme E2 7 [Oryza sativa Japonica Group]	Genetic Information Processing;Genetic Information Processing	Folding, sorting and degradation;Folding, sorting and degradation	ko04141//Protein processing in endoplasmic reticulum;ko04120//Ubiquitin mediated proteolysis	K10575;K10575	-	GO:0005515//protein binding	-
State 1,2 -vs- State 1,3	SK1G00040132	4	5.16381479141587e-12	1.48092e-10	--	XP_015629123.1 uncharacterized protein LOC4327369 isoform X1 [Oryza sativa Japonica Group]	-	-	-	-	-	-	-
State 1,2 -vs- State 1,3	SK1G00040134	2	1.49341128624712e-10	3.83128e-09	UXS1	XP_015621250.1 UDP-glucuronic acid decarboxylase 1 [Oryza sativa Japonica Group]	Metabolism;Metabolism	Global and overview maps;Carbohydrate metabolism	ko01100//Metabolic pathways;ko00520//Amino sugar and nucleotide sugar metabolism	K08678;K08678	-	GO:0003824//catalytic activity;GO:0003854//3-beta-hydroxy-delta5-steroid dehydrogenase activity;GO:0003978//UDP-glucose 4-epimerase activity;GO:0008446//GDP-mannose 4,6-dehydratase activity;GO:0008460//dTDP-glucose 4,6-dehydratase activity;GO:0008712//ADP-glyceromanno-heptose 6-epimerase activity;GO:0008831//dTDP-4-dehydrorhamnose reductase activity;GO:0016616//oxidoreductase activity, acting on …	GO:0000271//polysaccharide biosynthetic process;GO:0006012//galactose metabolic process;GO:0006694//steroid biosynthetic process;GO:0009243//O antigen biosynthetic process;GO:0009244//lipopolysaccharide core region biosynthetic process;GO:0019305//dTDP-rhamnose biosynthetic process;GO:0055114//oxidation-reduction process
State 1,2 -vs- State 1,3	SK1G00040156	5	1.17297723364856e-20	5.9793e-19	RPS23	EAZ14059.1 hypothetical protein OsJ_03983 [Oryza sativa Japonica Group]	Genetic Information Processing	Translation	ko03010//Ribosome	K02973	GO:0000314//organellar small ribosomal subunit;GO:0005634//nucleus;GO:0005840//ribosome;GO:0022627//cytosolic small ribosomal subunit	GO:0003677//DNA binding;GO:0003735//structural constituent of ribosome;GO:0004879//RNA polymerase II transcription factor activity, ligand-activated sequence-specific DNA binding;GO:0005496//steroid binding	GO:0006355//regulation of transcription, DNA-templated;GO:0006412//translation;GO:0030521//androgen receptor signaling pathway
State 1,2 -vs- State 1,3	SK1G00040168	3	7.76071471979794e-09	1.70506e-07	--	EEC71748.1 hypothetical protein OsI_04317 [Oryza sativa Indica Group]	-	-	-	-	-	GO:0050385//ureidoglycolate lyase activity	GO:0000256//allantoin catabolic process
State 1,2 -vs- State 1,3	SK1G00040179	4	4.01788879302146e-38	4.06106e-36	AMT2-3	XP_015621584.1 ammonium transporter 2 member 3 [Oryza sativa Japonica Group]	-	-	-	-	GO:0016020//membrane	GO:0008519//ammonium transmembrane transporter activity	GO:0015696//ammonium transport
State 1,2 -vs- State 1,3	SK1G00040184	1	9.90497599256707e-15	3.4766e-13	--	EAY76368.1 hypothetical protein OsI_04299 [Oryza sativa Indica Group]	-	-	-	-	-	GO:0016491//oxidoreductase activity	GO:0055114//oxidation-reduction process
State 1,2 -vs- State 1,3	SK1G00040246	4	3.46910817775497e-14	1.15883e-12	WRKY54	EAY76303.1 hypothetical protein OsI_04237 [Oryza sativa Indica Group]	-	-	-	-	-	GO:0003700//transcription factor activity, sequence-specific DNA binding;GO:0043565//sequence-specific DNA binding	GO:0006355//regulation of transcription, DNA-templated
State 1,2 -vs- State 1,3	SK1G00040266	2	1.90964049570796e-08	4.03369e-07	At1g06840	XP_015620925.1 probable LRR receptor-like serine/threonine-protein kinase At1g06840 isoform X1 [Oryza sativa Japonica Group]	-	-	-	-	-	GO:0004672//protein kinase activity;GO:0005515//protein binding;GO:0005524//ATP binding	GO:0006468//protein phosphorylation
State 1,2 -vs- State 1,3	SK1G00040267	3	1.07888681533802e-12	3.25837e-11	WOX8	XP_015626455.1 WUSCHEL-related homeobox 8 [Oryza sativa Japonica Group]	-	-	-	-	GO:0005634//nucleus	GO:0003677//DNA binding;GO:0005524//ATP binding	GO:0006355//regulation of transcription, DNA-templated
State 1,2 -vs- State 1,3	SK1G00040275	5	2.11553068479965e-08	4.4367e-07	At2g38640	XP_015633857.1 protein LURP-one-related 8 [Oryza sativa Japonica Group]	-	-	-	-	-	-	-
State 1,2 -vs- State 1,3	SK1G00040292	1	1.52921499337036e-58	2.77801e-56	--	EAY76263.1 hypothetical protein OsI_04198 [Oryza sativa Indica Group]	-	-	-	-	-	-	-
State 1,2 -vs- State 1,3	SK1G00040297	4	3.8370078994656e-13	1.19252e-11	--	EAZ13927.1 hypothetical protein OsJ_03852 [Oryza sativa Japonica Group]	-	-	-	-	-	-	-
State 1,2 -vs- State 1,3	SK1G00040349	1	1.54619714606854e-22	8.74072e-21	SCAB1	XP_015621581.1 stomatal closure-related actin-binding protein 1 [Oryza sativa Japonica Group]	-	-	-	-	-	GO:0003779//actin binding	-
State 1,2 -vs- State 1,3	SK1G00040355	4	7.43402554175772e-11	1.9599e-09	RPL34	XP_015614884.1 50S ribosomal protein L34, chloroplastic [Oryza sativa Japonica Group]	Genetic Information Processing	Translation	ko03010//Ribosome	K02914	GO:0000315//organellar large ribosomal subunit;GO:0005840//ribosome;GO:0022625//cytosolic large ribosomal subunit	GO:0003735//structural constituent of ribosome	GO:0006412//translation
State 1,2 -vs- State 1,3	SK1G00040364	2	8.16660388128048e-26	5.42518e-24	Os01g0803200	XP_015621143.1 cysteine proteinase inhibitor 1 [Oryza sativa Japonica Group]	-	-	-	-	-	GO:0004869//cysteine-type endopeptidase inhibitor activity	-
State 1,2 -vs- State 1,3	SK1G00040405	4	8.54891823280643e-12	2.42025e-10	--	XP_015643090.1 uncharacterized protein LOC107278632 [Oryza sativa Japonica Group]	-	-	-	-	-	-	-
State 1,2 -vs- State 1,3	SK1G00040410	5	2.59359215161606e-09	5.9575e-08	GOS2	XP_015621165.1 protein translation factor SUI1 homolog isoform X2 [Oryza sativa Japonica Group]	Genetic Information Processing	Translation	ko03013//RNA transport	K03113	GO:0005840//ribosome	GO:0003743//translation initiation factor activity	GO:0006413//translational initiation
State 1,2 -vs- State 1,3	SK1G00040416	5	4.47766233142996e-08	9.03085e-07	--	EAY76123.1 hypothetical protein OsI_04052 [Oryza sativa Indica Group]	-	-	-	-	-	GO:0005524//ATP binding	GO:0019069//viral capsid assembly
State 1,2 -vs- State 1,3	SK1G00040431	1	5.33999959881628e-09	1.18919e-07	NTF2B	XP_015633739.1 nuclear transport factor 2B [Oryza sativa Japonica Group]	-	-	-	-	-	-	GO:0006323//DNA packaging
State 1,2 -vs- State 1,3	SK1G00040432	2	5.98368925520112e-122	3.40443e-119	SABP2	EAY76101.1 hypothetical protein OsI_04027 [Oryza sativa Indica Group]	-	-	-	-	-	GO:0003674//molecular_function;GO:0003824//catalytic activity;GO:0008236//serine-type peptidase activity;GO:0016787//hydrolase activity;GO:0016788//hydrolase activity, acting on ester bonds;GO:0047570//3-oxoadipate enol-lactonase activity;GO:0047746//chlorophyllase activity;GO:0070205//2-succinyl-6-hydroxy-2,4-cyclohexadiene-1-carboxylate synthase activity	GO:0006508//proteolysis;GO:0006629//lipid metabolic process;GO:0009058//biosynthetic process;GO:0009102//biotin biosynthetic process;GO:0009234//menaquinone biosynthetic process;GO:0015979//photosynthesis;GO:0015996//chlorophyll catabolic process;GO:0042952//beta-ketoadipate pathway
State 1,2 -vs- State 1,3	SK1G00040452	2	3.34394248979365e-21	1.75011e-19	FQR1	EAY76084.1 hypothetical protein OsI_04011 [Oryza sativa Indica Group]	Metabolism;Metabolism;Metabolism	Global and overview maps;Global and overview maps;Metabolism of cofactors and vitamins	ko01100//Metabolic pathways;ko01110//Biosynthesis of secondary metabolites;ko00130//Ubiquinone and other terpenoid-quinone biosynthesis	K03809;K03809;K03809	-	GO:0003955//NAD(P)H dehydrogenase (quinone) activity;GO:0009055//electron carrier activity;GO:0010181//FMN binding;GO:0016491//oxidoreductase activity	GO:0055114//oxidation-reduction process
State 1,2 -vs- State 1,3	SK1G00040455	2	8.22174532332122e-19	3.85668e-17	SD18	EAY76080.1 hypothetical protein OsI_04007 [Oryza sativa Indica Group]	-	-	-	-	-	GO:0004672//protein kinase activity;GO:0004674//protein serine/threonine kinase activity;GO:0005524//ATP binding	GO:0006468//protein phosphorylation;GO:0048544//recognition of pollen
State 1,2 -vs- State 1,3	SK1G00040459	1	5.51448327118537e-23	3.20996e-21	PHOS34	XP_015622057.1 universal stress protein PHOS32 [Oryza sativa Japonica Group]	-	-	-	-	-	-	-
State 1,2 -vs- State 1,3	SK1G00040461	3	1.77844092013452e-79	5.36192e-77	DGK5	EEE55501.1 hypothetical protein OsJ_03694 [Oryza sativa Japonica Group]	Metabolism;Metabolism;Metabolism;Metabolism;Environmental Information Processing	Global and overview maps;Global and overview maps;Lipid metabolism;Lipid metabolism;Signal transduction	ko01100//Metabolic pathways;ko01110//Biosynthesis of secondary metabolites;ko00564//Glycerophospholipid metabolism;ko00561//Glycerolipid metabolism;ko04070//Phosphatidylinositol signaling system	K00901;K00901;K00901;K00901;K00901	GO:0005575//cellular_component	GO:0001727//lipid kinase activity;GO:0003951//NAD+ kinase activity;GO:0004143//diacylglycerol kinase activity;GO:0016301//kinase activity	GO:0006741//NADP biosynthetic process;GO:0007205//protein kinase C-activating G-protein coupled receptor signaling pathway;GO:0008150//biological_process
State 1,2 -vs- State 1,3	SK1G00040471	2	1.59849401590108e-30	1.31132e-28	ULT1	XP_015621397.1 protein ULTRAPETALA 1 [Oryza sativa Japonica Group]	-	-	-	-	-	GO:0003677//DNA binding	-
State 1,2 -vs- State 1,3	SK1G00040482	2	5.75648376558326e-10	1.40106e-08	PXM16	XP_015612738.1 insulin-degrading enzyme-like 1, peroxisomal [Oryza sativa Japonica Group]	-	-	-	-	-	GO:0004222//metalloendopeptidase activity	GO:0018189//pyrroloquinoline quinone biosynthetic process
State 1,2 -vs- State 1,3	SK1G00040512	5	6.10580500848521e-29	4.68222e-27	BHLH148	XP_015635057.1 transcription factor BHLH148-like [Oryza sativa Japonica Group]	-	-	-	-	-	GO:0043565//sequence-specific DNA binding;GO:0046983//protein dimerization activity	-
State 1,2 -vs- State 1,3	SK1G00040523	3	1.53142865607043e-08	3.26018e-07	HD16	KAB8083716.1 hypothetical protein EE612_006012 [Oryza sativa]	-	-	-	-	-	GO:0004672//protein kinase activity;GO:0005524//ATP binding	GO:0006468//protein phosphorylation
State 1,2 -vs- State 1,3	SK1G00040554	2	5.65437841446508e-26	3.80645e-24	--	XP_015611969.1 uncharacterized protein LOC4325501 isoform X1 [Oryza sativa Japonica Group]	-	-	-	-	-	-	-
State 1,2 -vs- State 1,3	SK1G00040578	2	1.52063467478613e-27	1.0947e-25	CM1	EAY75932.1 hypothetical protein OsI_03851 [Oryza sativa Indica Group]	Metabolism;Metabolism;Metabolism;Metabolism	Global and overview maps;Global and overview maps;Global and overview maps;Amino acid metabolism	ko01100//Metabolic pathways;ko01110//Biosynthesis of secondary metabolites;ko01230//Biosynthesis of amino acids;ko00400//Phenylalanine, tyrosine and tryptophan biosynthesis	K01850;K01850;K01850;K01850	-	GO:0004106//chorismate mutase activity	GO:0046417//chorismate metabolic process
State 1,2 -vs- State 1,3	SK1G00040581	2	9.97791695844045e-16	3.76843e-14	GSTF2	XP_015614423.1 probable glutathione S-transferase GSTF2 [Oryza sativa Japonica Group]	Metabolism;Metabolism	Global and overview maps;Metabolism of other amino acids	ko01100//Metabolic pathways;ko00480//Glutathione metabolism	K00799;K00799	-	GO:0005515//protein binding;GO:0016034//maleylacetoacetate isomerase activity;GO:0016614//oxidoreductase activity, acting on CH-OH group of donors	GO:0006559//L-phenylalanine catabolic process;GO:0006572//tyrosine catabolic process;GO:0006749//glutathione metabolic process;GO:0055114//oxidation-reduction process
State 1,2 -vs- State 1,3	SK1G00040622	5	1.61574661040818e-08	3.43553e-07	HIPP28	EAY75881.1 hypothetical protein OsI_03800 [Oryza sativa Indica Group]	-	-	-	-	-	GO:0005507//copper ion binding;GO:0045340//mercury ion binding;GO:0046872//metal ion binding	GO:0006825//copper ion transport;GO:0015694//mercury ion transport
State 1,2 -vs- State 1,3	SK1G00040630	4	4.745980736741e-48	6.72347e-46	GA2OX3	EAY75874.1 hypothetical protein OsI_03793 [Oryza sativa Indica Group]	Metabolism;Metabolism	Global and overview maps;Metabolism of terpenoids and polyketides	ko01110//Biosynthesis of secondary metabolites;ko00904//Diterpenoid biosynthesis	K04125;K04125	-	GO:0016491//oxidoreductase activity	GO:0055114//oxidation-reduction process
State 1,2 -vs- State 1,3	SK1G00040647	2	4.81135875974956e-09	1.07965e-07	--	EEC71500.1 hypothetical protein OsI_03777 [Oryza sativa Indica Group]	-	-	-	-	-	GO:0004674//protein serine/threonine kinase activity;GO:0005524//ATP binding	GO:0007059//chromosome segregation;GO:0030261//chromosome condensation
State 1,2 -vs- State 1,3	SK1G00040665	4	1.86327443329435e-28	1.40143e-26	RPL18A	XP_006644713.1 PREDICTED: 60S ribosomal protein L18a [Oryza brachyantha]	Genetic Information Processing	Translation	ko03010//Ribosome	K02882	GO:0005840//ribosome	GO:0003735//structural constituent of ribosome	GO:0006412//translation
State 1,2 -vs- State 1,3	SK1G00040679	2	2.33745323001688e-08	4.87891e-07	WRKY69	ABO34049.1 defense-responsive protein WRKY13 [Oryza sativa Indica Group]	-	-	-	-	-	GO:0003700//transcription factor activity, sequence-specific DNA binding;GO:0043565//sequence-specific DNA binding	GO:0006355//regulation of transcription, DNA-templated
State 1,2 -vs- State 1,3	SK1G00040700	4	2.33317963541995e-21	1.23764e-19	PYRC	XP_015621519.1 dihydroorotase, mitochondrial [Oryza sativa Japonica Group]	Metabolism;Metabolism	Global and overview maps;Nucleotide metabolism	ko01100//Metabolic pathways;ko00240//Pyrimidine metabolism	K01465;K01465	-	GO:0004151//dihydroorotase activity;GO:0016787//hydrolase activity	GO:0009220//pyrimidine ribonucleotide biosynthetic process
State 1,2 -vs- State 1,3	SK1G00040701	2	2.557342668666e-13	8.01869e-12	HT1	EAY75804.1 hypothetical protein OsI_03719 [Oryza sativa Indica Group]	-	-	-	-	-	GO:0004413//homoserine kinase activity;GO:0004672//protein kinase activity;GO:0005524//ATP binding	GO:0006468//protein phosphorylation;GO:0009088//threonine biosynthetic process
State 1,2 -vs- State 1,3	SK1G00040725	5	4.50407135935907e-12	1.3023e-10	--	EAY75778.1 hypothetical protein OsI_03694 [Oryza sativa Indica Group]	-	-	-	-	-	GO:0005515//protein binding	-
State 1,2 -vs- State 1,3	SK1G00040733	5	4.59407525437099e-17	1.90207e-15	IAA6	EAY75770.1 hypothetical protein OsI_03686 [Oryza sativa Indica Group]	Environmental Information Processing	Signal transduction	ko04075//Plant hormone signal transduction	K14484	-	-	-
State 1,2 -vs- State 1,3	SK1G00040744	4	2.82310621398095e-10	7.08286e-09	--	EAY75762.1 hypothetical protein OsI_03675 [Oryza sativa Indica Group]	-	-	-	-	GO:0001669//acrosomal vesicle	-	GO:0007340//acrosome reaction;GO:0007342//fusion of sperm to egg plasma membrane
State 1,2 -vs- State 1,3	SK1G00040752	4	2.60642162752158e-09	5.97799e-08	EPSIN1	XP_015620330.1 clathrin interactor EPSIN 1 isoform X1 [Oryza sativa Japonica Group]	Cellular Processes	Transport and catabolism	ko04144//Endocytosis	K12471	-	GO:0005543//phospholipid binding	-
State 1,2 -vs- State 1,3	SK1G00040767	3	5.55438476674703e-52	8.51874e-50	RTNLB1	EAY75742.1 hypothetical protein OsI_03655 [Oryza sativa Indica Group]	-	-	-	-	-	-	-
State 1,2 -vs- State 1,3	SK1G00040839	2	1.7222482980173e-70	4.27833e-68	Os01g0723600	EAY75668.1 hypothetical protein OsI_03574 [Oryza sativa Indica Group]	-	-	-	-	GO:0005737//cytoplasm	GO:0000287//magnesium ion binding;GO:0003999//adenine phosphoribosyltransferase activity;GO:0004422//hypoxanthine phosphoribosyltransferase activity;GO:0004588//orotate phosphoribosyltransferase activity;GO:0004749//ribose phosphate diphosphokinase activity	GO:0006166//purine ribonucleoside salvage;GO:0009116//nucleoside metabolic process;GO:0009152//purine ribonucleotide biosynthetic process;GO:0009165//nucleotide biosynthetic process;GO:0009220//pyrimidine ribonucleotide biosynthetic process
State 1,2 -vs- State 1,3	SK1G00040842	5	2.29662859143384e-09	5.32284e-08	RPS24A	XP_015614819.1 40S ribosomal protein S24-1 [Oryza sativa Japonica Group]	Genetic Information Processing	Translation	ko03010//Ribosome	K02974	GO:0005840//ribosome	GO:0003735//structural constituent of ribosome;GO:0005085//guanyl-nucleotide exchange factor activity	GO:0006412//translation
State 1,2 -vs- State 1,3	SK1G00040856	5	1.53875759436185e-13	4.90643e-12	SAT1	XP_015648299.1 probable serine acetyltransferase 1 [Oryza sativa Japonica Group]	Metabolism;Metabolism;Metabolism;Metabolism;Metabolism;Metabolism	Global and overview maps;Global and overview maps;Global and overview maps;Global and overview maps;Amino acid metabolism;Energy metabolism	ko01100//Metabolic pathways;ko01110//Biosynthesis of secondary metabolites;ko01200//Carbon metabolism;ko01230//Biosynthesis of amino acids;ko00270//Cysteine and methionine metabolism;ko00920//Sulfur metabolism	K00640;K00640;K00640;K00640;K00640;K00640	GO:0005737//cytoplasm	GO:0003977//UDP-N-acetylglucosamine diphosphorylase activity;GO:0008666//2,3,4,5-tetrahydropyridine-2,6-dicarboxylate N-succinyltransferase activity;GO:0008780//acyl-[acyl-carrier-protein]-UDP-N-acetylglucosamine O-acyltransferase activity;GO:0009001//serine O-acetyltransferase activity;GO:0016410//N-acyltransferase activity;GO:0019134//glucosamine-1-phosphate N-acetyltransferase activity	GO:0006535//cysteine biosynthetic process from serine;GO:0009089//lysine biosynthetic process via diaminopimelate;GO:0009103//lipopolysaccharide biosynthetic process;GO:0009245//lipid A biosynthetic process;GO:0009252//peptidoglycan biosynthetic process
State 1,2 -vs- State 1,3	SK1G00040858	5	9.36811901191719e-14	3.03732e-12	At1g17710	EAY75640.1 hypothetical protein OsI_03545 [Oryza sativa Indica Group]	Metabolism;Metabolism	Global and overview maps;Lipid metabolism	ko01100//Metabolic pathways;ko00564//Glycerophospholipid metabolism	K06124;K06124	-	GO:0016787//hydrolase activity;GO:0016791//phosphatase activity	GO:0008152//metabolic process
State 1,2 -vs- State 1,3	SK1G00040888	4	1.10980886093394e-16	4.46391e-15	--	EAY75611.1 hypothetical protein OsI_03515 [Oryza sativa Indica Group]	-	-	-	-	GO:0010007//magnesium chelatase complex	GO:0005488//binding;GO:0008168//methyltransferase activity;GO:0008170//N-methyltransferase activity;GO:0008171//O-methyltransferase activity;GO:0008689//3-demethylubiquinone-9 3-O-methyltransferase activity;GO:0008757//S-adenosylmethionine-dependent methyltransferase activity;GO:0016851//magnesium chelatase activity;GO:0046025//precorrin-6Y C5,15-methyltransferase (decarboxylating) activity;GO:00…	GO:0006412//translation;GO:0006744//ubiquinone biosynthetic process;GO:0008299//isoprenoid biosynthetic process;GO:0009102//biotin biosynthetic process;GO:0015995//chlorophyll biosynthetic process;GO:0018364//peptidyl-glutamine methylation;GO:0044272//sulfur compound biosynthetic process;GO:0046140//corrin biosynthetic process;GO:0055114//oxidation-reduction process
State 1,2 -vs- State 1,3	SK1G00040933	5	7.99937034386503e-11	2.10423e-09	MSI4	XP_015621920.2 WD-40 repeat-containing protein MSI4 isoform X1 [Oryza sativa Japonica Group]	-	-	-	-	-	GO:0005515//protein binding	-
State 1,2 -vs- State 1,3	SK1G00040941	2	2.28554382862792e-18	1.03362e-16	LOGL1	XP_015611657.1 probable cytokinin riboside 5'-monophosphate phosphoribohydrolase LOGL1 [Oryza sativa Japonica Group]	-	-	-	-	-	-	-
State 1,2 -vs- State 1,3	SK1G00040942	1	4.71957842350327e-08	9.49163e-07	CKL2	EAY75552.1 hypothetical protein OsI_03457 [Oryza sativa Indica Group]	-	-	-	-	-	GO:0004672//protein kinase activity;GO:0005524//ATP binding	GO:0006468//protein phosphorylation
State 1,2 -vs- State 1,3	SK1G00040965	4	1.62014827114711e-13	5.15336e-12	At1g15400	EAY75528.1 hypothetical protein OsI_03433 [Oryza sativa Indica Group]	-	-	-	-	-	-	-
State 1,2 -vs- State 1,3	SK1G00041003	4	2.38230494286545e-18	1.07325e-16	MAPKKK17	XP_015689680.1 PREDICTED: serine/threonine-protein kinase TAO3-like [Oryza brachyantha]	-	-	-	-	-	GO:0004672//protein kinase activity;GO:0005524//ATP binding;GO:0016709//oxidoreductase activity, acting on paired donors, with incorporation or reduction of molecular oxygen, NAD(P)H as one donor, and incorporation of one atom of oxygen;GO:0045735//nutrient reservoir activity	GO:0006468//protein phosphorylation;GO:0006744//ubiquinone biosynthetic process;GO:0009405//pathogenesis
State 1,2 -vs- State 1,3	SK1G00041025	4	8.60074474160942e-32	7.31063e-30	ABCB11	EEC71330.1 hypothetical protein OsI_03378 [Oryza sativa Indica Group]	Environmental Information Processing	Membrane transport	ko02010//ABC transporters	K05658	GO:0005575//cellular_component;GO:0005737//cytoplasm;GO:0005887//integral component of plasma membrane;GO:0009380//excinuclease repair complex;GO:0009898//cytoplasmic side of plasma membrane;GO:0016021//integral component of membrane;GO:0043190//ATP-binding cassette (ABC) transporter complex;GO:0055051//ATP-binding cassette (ABC) transporter complex, integrated substrate binding;GO:0055052//ATP-b…	GO:0003674//molecular_function;GO:0003924//GTPase activity;GO:0004020//adenylylsulfate kinase activity;GO:0004140//dephospho-CoA kinase activity;GO:0004849//uridine kinase activity;GO:0005260//channel-conductance-controlling ATPase activity;GO:0005319//lipid transporter activity;GO:0005524//ATP binding;GO:0005525//GTP binding;GO:0008134//transcription factor binding;GO:0008565//protein transporte…	GO:0000910//cytokinesis;GO:0006289//nucleotide-excision repair;GO:0006355//regulation of transcription, DNA-templated;GO:0006790//sulfur compound metabolic process;GO:0006810//transport;GO:0006817//phosphate ion transport;GO:0006824//cobalt ion transport;GO:0006855//drug transmembrane transport;GO:0006869//lipid transport;GO:0007186//G-protein coupled receptor signaling pathway;GO:0007601//visual…
State 1,2 -vs- State 1,3	SK1G00041029	5	3.83729933262657e-08	7.81078e-07	NMT1	XP_015622327.1 phosphoethanolamine N-methyltransferase 1 isoform X2 [Oryza sativa Japonica Group]	Metabolism	Lipid metabolism	ko00564//Glycerophospholipid metabolism	K05929	GO:0005737//cytoplasm	GO:0000179//rRNA (adenine-N6,N6-)-dimethyltransferase activity;GO:0003723//RNA binding;GO:0004719//protein-L-isoaspartate (D-aspartate) O-methyltransferase activity;GO:0008168//methyltransferase activity;GO:0008170//N-methyltransferase activity;GO:0008171//O-methyltransferase activity;GO:0008173//RNA methyltransferase activity;GO:0008176//tRNA (guanine-N7-)-methyltransferase activity;GO:0008649//…	GO:0000154//rRNA modification;GO:0006364//rRNA processing;GO:0006400//tRNA modification;GO:0006412//translation;GO:0006464//cellular protein modification process;GO:0006480//N-terminal protein amino acid methylation;GO:0006744//ubiquinone biosynthetic process;GO:0008299//isoprenoid biosynthetic process;GO:0009086//methionine biosynthetic process;GO:0009102//biotin biosynthetic process;GO:0009234/…
State 1,2 -vs- State 1,3	SK1G00041047	5	4.56908783968462e-26	3.10548e-24	Os01g0693400	XP_015622542.1 AP2/ERF and B3 domain-containing protein Os01g0693400 [Oryza sativa Japonica Group]	-	-	-	-	-	GO:0003677//DNA binding;GO:0003700//transcription factor activity, sequence-specific DNA binding	GO:0006355//regulation of transcription, DNA-templated
State 1,2 -vs- State 1,3	SK1G00041049	4	1.54687781536283e-35	1.47078e-33	LPP2	EAY75456.1 hypothetical protein OsI_03357 [Oryza sativa Indica Group]	Metabolism;Metabolism;Metabolism	Global and overview maps;Lipid metabolism;Lipid metabolism	ko01110//Biosynthesis of secondary metabolites;ko00564//Glycerophospholipid metabolism;ko00561//Glycerolipid metabolism	K18693;K18693;K18693	-	GO:0005451//monovalent cation:proton antiporter activity	GO:0015672//monovalent inorganic cation transport;GO:0015992//proton transport
State 1,2 -vs- State 1,3	SK1G00041103	4	6.78032038492591e-14	2.21664e-12	--	EEC71284.1 hypothetical protein OsI_03297 [Oryza sativa Indica Group]	-	-	-	-	-	-	-
State 1,2 -vs- State 1,3	SK1G00041112	2	4.56100507820107e-08	9.18843e-07	Os01g0681900	EAY75387.1 hypothetical protein OsI_03285 [Oryza sativa Indica Group]	Metabolism;Metabolism;Metabolism;Metabolism;Metabolism	Global and overview maps;Global and overview maps;Global and overview maps;Amino acid metabolism;Energy metabolism	ko01100//Metabolic pathways;ko01110//Biosynthesis of secondary metabolites;ko01230//Biosynthesis of amino acids;ko00250//Alanine, aspartate and glutamate metabolism;ko00910//Nitrogen metabolism	K00264;K00264;K00264;K00264;K00264	GO:0009342//glutamate synthase complex (NADPH)	GO:0003824//catalytic activity;GO:0004148//dihydrolipoyl dehydrogenase activity;GO:0004355//glutamate synthase (NADPH) activity;GO:0004362//glutathione-disulfide reductase activity;GO:0004452//isopentenyl-diphosphate delta-isomerase activity;GO:0004499//N,N-dimethylaniline monooxygenase activity;GO:0004729//oxygen-dependent protoporphyrinogen oxidase activity;GO:0004791//thioredoxin-disulfide red…	GO:0006096//glycolytic process;GO:0006537//glutamate biosynthetic process;GO:0006779//porphyrin-containing compound biosynthetic process;GO:0006790//sulfur compound metabolic process;GO:0006805//xenobiotic metabolic process;GO:0006807//nitrogen compound metabolic process;GO:0008299//isoprenoid biosynthetic process;GO:0009228//thiamine biosynthetic process;GO:0009398//FMN biosynthetic process;GO:0…
State 1,2 -vs- State 1,3	SK1G00041126	5	1.39033695689019e-10	3.57725e-09	Os01g0679700	NP_001147066.1 60S ribosomal protein L37a isoform 2 [Zea mays]	Genetic Information Processing	Translation	ko03010//Ribosome	K02921	GO:0000315//organellar large ribosomal subunit;GO:0005840//ribosome;GO:0022625//cytosolic large ribosomal subunit	GO:0003735//structural constituent of ribosome;GO:0008270//zinc ion binding;GO:0051539//4 iron, 4 sulfur cluster binding;GO:0070283//radical SAM enzyme activity	GO:0006412//translation;GO:0015948//methanogenesis;GO:0035556//intracellular signal transduction;GO:0046500//S-adenosylmethionine metabolic process
State 1,2 -vs- State 1,3	SK1G00041195	4	1.63109432777312e-16	6.50134e-15	RABA1F	XP_015615400.1 ras-related protein RABA1f [Oryza sativa Japonica Group]	-	-	-	-	GO:0005737//cytoplasm	GO:0003677//DNA binding;GO:0003924//GTPase activity;GO:0005524//ATP binding;GO:0005525//GTP binding;GO:0016887//ATPase activity;GO:0017111//nucleoside-triphosphatase activity;GO:0043022//ribosome binding;GO:0051539//4 iron, 4 sulfur cluster binding	GO:0006400//tRNA modification;GO:0032508//DNA duplex unwinding;GO:0042254//ribosome biogenesis;GO:0051186//cofactor metabolic process
State 1,2 -vs- State 1,3	SK1G00041217	2	2.11368732013213e-16	8.34008e-15	MPK8	XP_015611050.1 mitogen-activated protein kinase 8 isoform X1 [Oryza sativa Japonica Group]	-	-	-	-	-	GO:0004672//protein kinase activity;GO:0005524//ATP binding	GO:0006468//protein phosphorylation
State 1,2 -vs- State 1,3	SK1G00041219	3	4.12126178173823e-19	1.96191e-17	--	XP_015645030.1 uncharacterized protein LOC4326851 [Oryza sativa Japonica Group]	-	-	-	-	-	-	-
State 1,2 -vs- State 1,3	SK1G00041234	4	4.75951424288008e-41	5.15006e-39	RPL12-2	XP_015624137.1 50S ribosomal protein L12, chloroplastic [Oryza sativa Japonica Group]	Genetic Information Processing	Translation	ko03010//Ribosome	K02935	GO:0000315//organellar large ribosomal subunit;GO:0005840//ribosome;GO:0022625//cytosolic large ribosomal subunit	GO:0003735//structural constituent of ribosome	GO:0006412//translation
State 1,2 -vs- State 1,3	SK1G00041239	3	4.66196865542168e-09	1.04879e-07	AMSH2	BAD72364.1 ALM beta-like [Oryza sativa Japonica Group]	Cellular Processes	Transport and catabolism	ko04144//Endocytosis	K11866	-	GO:0005515//protein binding;GO:0008237//metallopeptidase activity;GO:0070122//isopeptidase activity	-
State 1,2 -vs- State 1,3	SK1G00041276	2	5.55381646502839e-14	1.82753e-12	CICDH	XP_015612407.1 cytosolic isocitrate dehydrogenase [NADP] [Oryza sativa Japonica Group]	Metabolism;Metabolism;Metabolism;Metabolism;Metabolism;Cellular Processes;Metabolism;Metabolism	Global and overview maps;Global and overview maps;Global and overview maps;Global and overview maps;Metabolism of other amino acids;Transport and catabolism;Carbohydrate metabolism;Global and overview maps	ko01100//Metabolic pathways;ko01110//Biosynthesis of secondary metabolites;ko01200//Carbon metabolism;ko01230//Biosynthesis of amino acids;ko00480//Glutathione metabolism;ko04146//Peroxisome;ko00020//Citrate cycle (TCA cycle);ko01210//2-Oxocarboxylic acid metabolism	K00031;K00031;K00031;K00031;K00031;K00031;K00031;K00031	GO:0005962//mitochondrial isocitrate dehydrogenase complex (NAD+);GO:0045243//cytosolic isocitrate dehydrogenase complex (NAD+)	GO:0003862//3-isopropylmalate dehydrogenase activity;GO:0004449//isocitrate dehydrogenase (NAD+) activity;GO:0004450//isocitrate dehydrogenase (NADP+) activity;GO:0016616//oxidoreductase activity, acting on the CH-OH group of donors, NAD or NADP as acceptor	GO:0006099//tricarboxylic acid cycle;GO:0006102//isocitrate metabolic process;GO:0009098//leucine biosynthetic process;GO:0055114//oxidation-reduction process
State 1,2 -vs- State 1,3	SK1G00041280	5	2.32684715732646e-08	4.85965e-07	ctps2	XP_015622258.1 CTP synthase isoform X2 [Oryza sativa Japonica Group]	Metabolism;Metabolism	Global and overview maps;Nucleotide metabolism	ko01100//Metabolic pathways;ko00240//Pyrimidine metabolism	K01937;K01937	GO:0005951//carbamoyl-phosphate synthase complex	GO:0000107//imidazoleglycerol-phosphate synthase activity;GO:0003883//CTP synthase activity;GO:0003922//GMP synthase (glutamine-hydrolyzing) activity;GO:0004088//carbamoyl-phosphate synthase (glutamine-hydrolyzing) activity;GO:0016787//hydrolase activity;GO:0016884//carbon-nitrogen ligase activity, with glutamine as amido-N-donor	GO:0000105//histidine biosynthetic process;GO:0006177//GMP biosynthetic process;GO:0006221//pyrimidine nucleotide biosynthetic process;GO:0009220//pyrimidine ribonucleotide biosynthetic process
State 1,2 -vs- State 1,3	SK1G00041335	2	1.08127655172238e-14	3.78018e-13	Os01g0645000	XP_015631641.1 zinc finger CCCH domain-containing protein 9 isoform X1 [Oryza sativa Japonica Group]	-	-	-	-	-	GO:0046872//metal ion binding	-
State 1,2 -vs- State 1,3	SK1G00041340	4	1.01335417220935e-18	4.70963e-17	--	XP_015648357.1 uncharacterized protein LOC4326569 [Oryza sativa Japonica Group]	-	-	-	-	-	-	-
State 1,2 -vs- State 1,3	SK1G00041359	2	3.57972240262126e-62	7.2157e-60	--	XP_015617246.1 carbonic anhydrase, chloroplastic isoform X3 [Oryza sativa Japonica Group]	Metabolism;Metabolism	Global and overview maps;Energy metabolism	ko01100//Metabolic pathways;ko00910//Nitrogen metabolism	K01673;K01673	-	-	-
State 1,2 -vs- State 1,3	SK1G00041367	1	9.0905622837588e-24	5.45356e-22	TOGT1	EAY75107.1 hypothetical protein OsI_03002 [Oryza sativa Indica Group]	Metabolism;Metabolism	Global and overview maps;Biosynthesis of other secondary metabolites	ko01110//Biosynthesis of secondary metabolites;ko00940//Phenylpropanoid biosynthesis	K23260;K23260	-	GO:0000150//recombinase activity;GO:0003697//single-stranded DNA binding;GO:0008194//UDP-glycosyltransferase activity	GO:0000002//mitochondrial genome maintenance;GO:0006310//DNA recombination
State 1,2 -vs- State 1,3	SK1G00041426	2	1.97435659602269e-09	4.60923e-08	WRKY23	KAB8082551.1 hypothetical protein EE612_004469 [Oryza sativa]	-	-	-	-	GO:0005664//nuclear origin of replication recognition complex	GO:0003677//DNA binding;GO:0003700//transcription factor activity, sequence-specific DNA binding;GO:0043565//sequence-specific DNA binding	GO:0006260//DNA replication;GO:0006355//regulation of transcription, DNA-templated
State 1,2 -vs- State 1,3	SK1G00041432	5	4.66072789726933e-10	1.14172e-08	KIN13B	XP_015620912.1 kinesin-like protein KIN-13B [Oryza sativa Japonica Group]	-	-	-	-	GO:0016021//integral component of membrane	GO:0005524//ATP binding;GO:0008017//microtubule binding	GO:0007018//microtubule-based movement;GO:0009405//pathogenesis
State 1,2 -vs- State 1,3	SK1G00041477	4	1.10748863986391e-18	5.12014e-17	ERI2	EAY74980.1 hypothetical protein OsI_02878 [Oryza sativa Indica Group]	-	-	-	-	GO:0009360//DNA polymerase III complex	GO:0003887//DNA-directed DNA polymerase activity;GO:0004527//exonuclease activity;GO:0008026//ATP-dependent helicase activity	GO:0006260//DNA replication
State 1,2 -vs- State 1,3	SK1G00041497	2	3.81711294361446e-43	4.45856e-41	--	AAW72834.1 subitilisin-chymotrypsin inhibitor [Oryza sativa Japonica Group]	-	-	-	-	-	GO:0004867//serine-type endopeptidase inhibitor activity	GO:0009611//response to wounding
State 1,2 -vs- State 1,3	SK1G00041498	2	1.79593710388412e-14	6.16862e-13	--	AAW72835.1 subitilisin-chymotrypsin inhibitor [Oryza sativa Japonica Group]	-	-	-	-	-	GO:0004867//serine-type endopeptidase inhibitor activity	GO:0009611//response to wounding
State 1,2 -vs- State 1,3	SK1G00041533	2	2.68089620713471e-18	1.20623e-16	ABCG37	XP_015648329.1 ABC transporter G family member 37 isoform X1 [Oryza sativa Japonica Group]	-	-	-	-	GO:0005575//cellular_component;GO:0005737//cytoplasm;GO:0005887//integral component of plasma membrane;GO:0009379//Holliday junction helicase complex;GO:0009380//excinuclease repair complex;GO:0009898//cytoplasmic side of plasma membrane;GO:0016020//membrane;GO:0016021//integral component of membrane;GO:0043190//ATP-binding cassette (ABC) transporter complex;GO:0055051//ATP-binding cassette (ABC)…	GO:0000166//nucleotide binding;GO:0003674//molecular_function;GO:0003723//RNA binding;GO:0003724//RNA helicase activity;GO:0003924//GTPase activity;GO:0004385//guanylate kinase activity;GO:0004386//helicase activity;GO:0005260//channel-conductance-controlling ATPase activity;GO:0005319//lipid transporter activity;GO:0005524//ATP binding;GO:0005525//GTP binding;GO:0008565//protein transporter acti…	GO:0000910//cytokinesis;GO:0002949//tRNA threonylcarbamoyladenosine modification;GO:0006281//DNA repair;GO:0006289//nucleotide-excision repair;GO:0006310//DNA recombination;GO:0006400//tRNA modification;GO:0006464//cellular protein modification process;GO:0006576//cellular biogenic amine metabolic process;GO:0006777//Mo-molybdopterin cofactor biosynthetic process;GO:0006810//transport;GO:0006817/…
State 1,2 -vs- State 1,3	SK1G00041543	2	1.63402953315338e-14	5.61797e-13	BAT1	XP_015622189.1 amino-acid permease BAT1 homolog isoform X2 [Oryza sativa Japonica Group]	-	-	-	-	GO:0005887//integral component of plasma membrane;GO:0016020//membrane	GO:0005275//amine transmembrane transporter activity;GO:0022857//transmembrane transporter activity	GO:0015837//amine transport;GO:0055085//transmembrane transport
State 1,2 -vs- State 1,3	SK1G00041548	5	4.02219033731371e-26	2.73905e-24	dnajb6-a	KAF2951092.1 hypothetical protein DAI22_01g237000 [Oryza sativa Japonica Group]	-	-	-	-	-	GO:0005515//protein binding	GO:0006457//protein folding;GO:0009408//response to heat
State 1,2 -vs- State 1,3	SK1G00041559	4	2.52045141264701e-15	9.29038e-14	HSR4	XP_015621227.1 AAA-ATPase At3g50940 [Oryza sativa Japonica Group]	-	-	-	-	GO:0000502//proteasome complex;GO:0009360//DNA polymerase III complex;GO:0009379//Holliday junction helicase complex;GO:0009898//cytoplasmic side of plasma membrane;GO:0055052//ATP-binding cassette (ABC) transporter complex, substrate-binding subunit-containing	GO:0003723//RNA binding;GO:0003724//RNA helicase activity;GO:0003887//DNA-directed DNA polymerase activity;GO:0004222//metalloendopeptidase activity;GO:0004386//helicase activity;GO:0005524//ATP binding;GO:0009378//four-way junction helicase activity;GO:0015412//molybdate transmembrane-transporting ATPase activity;GO:0016818//hydrolase activity, acting on acid anhydrides, in phosphorus-containing…	GO:0006260//DNA replication;GO:0006281//DNA repair;GO:0006310//DNA recombination;GO:0006508//proteolysis;GO:0010498//proteasomal protein catabolic process;GO:0015689//molybdate ion transport;GO:0019941//modification-dependent protein catabolic process;GO:0032297//negative regulation of DNA-dependent DNA replication initiation;GO:0051301//cell division
State 1,2 -vs- State 1,3	SK1G00041571	3	2.72396061607977e-33	2.4326e-31	KUA1	XP_015648805.1 transcription factor KUA1 [Oryza sativa Japonica Group]	-	-	-	-	-	-	-
State 1,2 -vs- State 1,3	SK1G00041577	3	1.20348241487606e-10	3.11466e-09	CYP72A225	XP_025815404.1 uncharacterized protein LOC112892460 [Panicum hallii]	-	-	-	-	GO:0005737//cytoplasm;GO:0005887//integral component of plasma membrane;GO:0016020//membrane	GO:0003885//D-arabinono-1,4-lactone oxidase activity;GO:0004802//transketolase activity;GO:0005506//iron ion binding;GO:0016705//oxidoreductase activity, acting on paired donors, with incorporation or reduction of molecular oxygen;GO:0020037//heme binding;GO:0046559//alpha-glucuronidase activity	GO:0006098//pentose-phosphate shunt;GO:0045493//xylan catabolic process;GO:0055114//oxidation-reduction process
State 1,2 -vs- State 1,3	SK1G00041600	3	5.57724500768247e-23	3.24114e-21	TOGT1	XP_015621166.1 scopoletin glucosyltransferase [Oryza sativa Japonica Group]	Metabolism;Metabolism	Global and overview maps;Biosynthesis of other secondary metabolites	ko01110//Biosynthesis of secondary metabolites;ko00940//Phenylpropanoid biosynthesis	K23260;K23260	-	GO:0008194//UDP-glycosyltransferase activity	-
State 1,2 -vs- State 1,3	SK1G00041611	4	5.17417668301962e-40	5.39997e-38	D14	XP_015650138.1 probable esterase KAI2 [Oryza sativa Japonica Group]	-	-	-	-	-	GO:0003674//molecular_function;GO:0003824//catalytic activity;GO:0047570//3-oxoadipate enol-lactonase activity;GO:0070205//2-succinyl-6-hydroxy-2,4-cyclohexadiene-1-carboxylate synthase activity	GO:0009102//biotin biosynthetic process;GO:0009234//menaquinone biosynthetic process;GO:0015979//photosynthesis;GO:0042952//beta-ketoadipate pathway
State 1,2 -vs- State 1,3	SK1G00041629	2	1.5255570777954e-15	5.68258e-14	FLZ10	XP_015620828.1 protein MARD1 isoform X1 [Oryza sativa Japonica Group]	-	-	-	-	-	-	-
State 1,2 -vs- State 1,3	SK1G00041635	2	1.37377499999693e-39	1.42529e-37	ALDH2C4	KAB8082074.1 hypothetical protein EE612_003819 [Oryza sativa]	Metabolism	Biosynthesis of other secondary metabolites	ko00940//Phenylpropanoid biosynthesis	K12355	-	GO:0003842//1-pyrroline-5-carboxylate dehydrogenase activity;GO:0004350//glutamate-5-semialdehyde dehydrogenase activity;GO:0004491//methylmalonate-semialdehyde dehydrogenase (acylating) activity;GO:0004777//succinate-semialdehyde dehydrogenase (NAD+) activity;GO:0008802//betaine-aldehyde dehydrogenase activity;GO:0009013//succinate-semialdehyde dehydrogenase [NAD(P)+] activity;GO:0016491//oxidor…	GO:0006527//arginine catabolic process;GO:0006561//proline biosynthetic process;GO:0006562//proline catabolic process;GO:0006574//valine catabolic process;GO:0006578//amino-acid betaine biosynthetic process;GO:0009450//gamma-aminobutyric acid catabolic process;GO:0010124//phenylacetate catabolic process;GO:0055114//oxidation-reduction process
State 1,2 -vs- State 1,3	SK1G00041650	3	1.6380991248586e-25	1.0681e-23	LOG	XP_015621391.1 cytokinin riboside 5'-monophosphate phosphoribohydrolase LOG [Oryza sativa Japonica Group]	-	-	-	-	-	-	-
State 1,2 -vs- State 1,3	SK1G00041656	4	2.02010435056622e-12	5.95813e-11	HIR1	XP_015611928.1 hypersensitive-induced response protein 1-like [Oryza sativa Japonica Group]	-	-	-	-	GO:0005840//ribosome;GO:0030288//outer membrane-bounded periplasmic space	GO:0003674//molecular_function;GO:0003735//structural constituent of ribosome	GO:0006412//translation;GO:0045861//negative regulation of proteolysis
State 1,2 -vs- State 1,3	SK1G00041679	3	2.20160742303981e-23	1.30305e-21	GPC1	XP_015615982.1 uncharacterized membrane protein C776.05 isoform X1 [Oryza sativa Japonica Group]	-	-	-	-	-	-	-
State 1,2 -vs- State 1,3	SK1G00041707	1	1.12034550277851e-27	8.13173e-26	ACO1	XP_015632196.1 1-aminocyclopropane-1-carboxylate oxidase 1 [Oryza sativa Japonica Group]	Metabolism;Metabolism;Metabolism	Global and overview maps;Global and overview maps;Amino acid metabolism	ko01100//Metabolic pathways;ko01110//Biosynthesis of secondary metabolites;ko00270//Cysteine and methionine metabolism	K05933;K05933;K05933	-	GO:0016491//oxidoreductase activity	GO:0055114//oxidation-reduction process
State 1,2 -vs- State 1,3	SK1G00041737	1	4.44307550580159e-59	8.24892e-57	RHD3	XP_015617808.1 protein ROOT HAIR DEFECTIVE 3 [Oryza sativa Japonica Group]	-	-	-	-	GO:0016020//membrane	GO:0000309//nicotinamide-nucleotide adenylyltransferase activity;GO:0003924//GTPase activity;GO:0005524//ATP binding;GO:0005525//GTP binding;GO:0008237//metallopeptidase activity;GO:0008241//peptidyl-dipeptidase activity;GO:0018835//carbon phosphorus lyase activity;GO:0019843//rRNA binding;GO:0043022//ribosome binding	GO:0006508//proteolysis;GO:0009435//NAD biosynthetic process;GO:0019634//organic phosphonate metabolic process;GO:0042254//ribosome biogenesis
State 1,2 -vs- State 1,3	SK1G00041761	2	7.22410498182714e-20	3.56905e-18	--	EAY74613.1 hypothetical protein OsI_02501 [Oryza sativa Indica Group]	-	-	-	-	-	-	-
State 1,2 -vs- State 1,3	SK1G00041802	2	1.03832614766595e-68	2.45818e-66	CYP76M7	XP_015628496.1 ent-cassadiene C11-alpha-hydroxylase 1-like [Oryza sativa Japonica Group]	Metabolism;Metabolism	Global and overview maps;Metabolism of terpenoids and polyketides	ko01110//Biosynthesis of secondary metabolites;ko00904//Diterpenoid biosynthesis	K16084;K16084	-	GO:0005506//iron ion binding;GO:0016705//oxidoreductase activity, acting on paired donors, with incorporation or reduction of molecular oxygen;GO:0020037//heme binding	GO:0009405//pathogenesis;GO:0055114//oxidation-reduction process
State 1,2 -vs- State 1,3	SK1G00041806	3	6.29655305202109e-15	2.25493e-13	--	-	-	-	-	-	-	-	-
State 1,2 -vs- State 1,3	SK1G00041848	3	1.22604731475095e-11	3.4379e-10	--	XP_015626165.1 uncharacterized protein LOC4325843 [Oryza sativa Japonica Group]	-	-	-	-	-	-	-
State 1,2 -vs- State 1,3	SK1G00041852	2	3.46647208268151e-47	4.66717e-45	--	XP_015614381.1 B2 protein [Oryza sativa Japonica Group]	-	-	-	-	-	-	-
State 1,2 -vs- State 1,3	SK1G00041879	5	2.67140969997289e-10	6.731e-09	LAT56	XP_015618887.1 putative pectate lyase 21 [Oryza sativa Japonica Group]	Metabolism;Metabolism	Global and overview maps;Carbohydrate metabolism	ko01100//Metabolic pathways;ko00040//Pentose and glucuronate interconversions	K01728;K01728	-	-	-
State 1,2 -vs- State 1,3	SK1G00041924	2	2.15951449283384e-28	1.61734e-26	CSC1	XP_015616435.1 calcium permeable stress-gated cation channel 1 [Oryza sativa Japonica Group]	-	-	-	-	GO:0016020//membrane	-	-
State 1,2 -vs- State 1,3	SK1G00042015	1	9.86934242227752e-13	2.99605e-11	murG	EAY74292.1 hypothetical protein OsI_02179 [Oryza sativa Indica Group]	Metabolism	Global and overview maps	ko01100//Metabolic pathways	K02563	-	GO:0008194//UDP-glycosyltransferase activity;GO:0016758//transferase activity, transferring hexosyl groups;GO:0050511//undecaprenyldiphospho-muramoylpentapeptide beta-N-acetylglucosaminyltransferase activity	GO:0005975//carbohydrate metabolic process;GO:0009252//peptidoglycan biosynthetic process;GO:0030259//lipid glycosylation
State 1,2 -vs- State 1,3	SK1G00042049	1	1.49197079169124e-43	1.77203e-41	At3g01520	XP_015620990.1 universal stress protein A-like protein [Oryza sativa Japonica Group]	-	-	-	-	-	-	-
State 1,2 -vs- State 1,3	SK1G00042058	4	1.99896353391174e-33	1.78968e-31	--	XP_015634905.1 uncharacterized protein LOC4324024 [Oryza sativa Japonica Group]	-	-	-	-	-	-	-
State 1,2 -vs- State 1,3	SK1G00042069	3	2.61918255352317e-11	7.1566e-10	RH3	ABA97831.1 retrotransposon protein, putative, Ty3-gypsy subclass [Oryza sativa Japonica Group]	-	-	-	-	-	-	GO:0010112//regulation of systemic acquired resistance
State 1,2 -vs- State 1,3	SK1G00042072	3	1.48362938431476e-15	5.53224e-14	HIPP20	XP_015622241.1 heavy metal-associated isoprenylated plant protein 20 [Oryza sativa Japonica Group]	-	-	-	-	-	GO:0005507//copper ion binding;GO:0045340//mercury ion binding;GO:0046872//metal ion binding	GO:0006825//copper ion transport;GO:0015694//mercury ion transport
State 1,2 -vs- State 1,3	SK1G00042084	2	1.27721980344622e-09	3.02782e-08	Os01g0505400	EEC70723.1 hypothetical protein OsI_02106 [Oryza sativa Indica Group]	Cellular Processes	Transport and catabolism	ko04146//Peroxisome	K12261	GO:0005948//acetolactate synthase complex	GO:0000287//magnesium ion binding;GO:0003824//catalytic activity;GO:0003984//acetolactate synthase activity;GO:0008949//oxalyl-CoA decarboxylase activity;GO:0009028//tartronate-semialdehyde synthase activity;GO:0016823//hydrolase activity, acting on acid carbon-carbon bonds, in ketonic substances;GO:0018492//carbon-monoxide dehydrogenase (acceptor) activity;GO:0030976//thiamine pyrophosphate bind…	GO:0006085//acetyl-CoA biosynthetic process;GO:0006113//fermentation;GO:0009097//isoleucine biosynthetic process;GO:0009099//valine biosynthetic process;GO:0009234//menaquinone biosynthetic process;GO:0009444//pyruvate oxidation;GO:0009636//response to toxic substance;GO:0009684//indoleacetic acid biosynthetic process;GO:0017000//antibiotic biosynthetic process;GO:0019310//inositol catabolic proc…
State 1,2 -vs- State 1,3	SK1G00042097	2	3.0328027465333e-26	2.08136e-24	LNK2	XP_015621062.1 protein LNK2 isoform X7 [Oryza sativa Japonica Group]	-	-	-	-	-	-	-
State 1,2 -vs- State 1,3	SK1G00042109	4	1.28777479626969e-80	3.98476e-78	PSBO	EEC70714.1 hypothetical protein OsI_02088 [Oryza sativa Indica Group]	Metabolism	Energy metabolism	ko00195//Photosynthesis	K02716	GO:0009654//photosystem II oxygen evolving complex	GO:0010242//oxygen evolving activity	GO:0010207//photosystem II assembly;GO:0042549//photosystem II stabilization
State 1,2 -vs- State 1,3	SK1G00042117	5	1.67231224518225e-30	1.36553e-28	OsI_002060	XP_015629887.1 probable histone H2A.5 [Oryza sativa Japonica Group]	-	-	-	-	-	GO:0003677//DNA binding;GO:0005096//GTPase activator activity	-
State 1,2 -vs- State 1,3	SK1G00042156	2	1.70760796968542e-19	8.28554e-18	DMP3	EAY74176.1 hypothetical protein OsI_02060 [Oryza sativa Indica Group]	-	-	-	-	-	-	GO:0040008//regulation of growth
State 1,2 -vs- State 1,3	SK1G00042247	2	3.13073836852355e-26	2.1444e-24	GSTF1	XP_015632407.1 probable glutathione S-transferase GSTF1 [Oryza sativa Japonica Group]	Metabolism;Metabolism	Global and overview maps;Metabolism of other amino acids	ko01100//Metabolic pathways;ko00480//Glutathione metabolism	K00799;K00799	-	GO:0003917//DNA topoisomerase type I activity;GO:0005515//protein binding;GO:0016034//maleylacetoacetate isomerase activity	GO:0006265//DNA topological change;GO:0006559//L-phenylalanine catabolic process;GO:0006572//tyrosine catabolic process;GO:0006749//glutathione metabolic process;GO:0019878//lysine biosynthetic process via aminoadipic acid
State 1,2 -vs- State 1,3	SK1G00042250	2	4.0464151963087e-178	3.39851e-175	GST4	XP_015622486.1 glutathione S-transferase 4 [Oryza sativa Japonica Group]	Metabolism;Metabolism	Global and overview maps;Metabolism of other amino acids	ko01100//Metabolic pathways;ko00480//Glutathione metabolism	K00799;K00799	-	GO:0005515//protein binding;GO:0016034//maleylacetoacetate isomerase activity	GO:0006559//L-phenylalanine catabolic process;GO:0006572//tyrosine catabolic process;GO:0006749//glutathione metabolic process
State 1,2 -vs- State 1,3	SK1G00042254	2	2.39579832555396e-10	6.07125e-09	CUL1	XP_015619069.1 cullin-1 [Oryza sativa Japonica Group]	Genetic Information Processing;Genetic Information Processing	Folding, sorting and degradation;Folding, sorting and degradation	ko04141//Protein processing in endoplasmic reticulum;ko04120//Ubiquitin mediated proteolysis	K03347;K03347	-	GO:0031625//ubiquitin protein ligase binding	GO:0006511//ubiquitin-dependent protein catabolic process
State 1,2 -vs- State 1,3	SK1G00042256	2	1.81861153646532e-10	4.64529e-09	GRXC1	XP_015642996.1 glutaredoxin-C1 [Oryza sativa Japonica Group]	-	-	-	-	-	GO:0009055//electron carrier activity;GO:0015035//protein disulfide oxidoreductase activity;GO:0015036//disulfide oxidoreductase activity	GO:0055114//oxidation-reduction process
State 1,2 -vs- State 1,3	SK1G00042297	5	9.83564673022761e-14	3.18305e-12	--	KAF2950128.1 hypothetical protein DAI22_01g142400 [Oryza sativa Japonica Group]	-	-	-	-	-	-	-
State 1,2 -vs- State 1,3	SK1G00042314	5	9.36440089788957e-45	1.15097e-42	RPS4	XP_015622456.1 40S ribosomal protein S4-like [Oryza sativa Japonica Group]	Genetic Information Processing	Translation	ko03010//Ribosome	K02987	-	GO:0003723//RNA binding	-
State 1,2 -vs- State 1,3	SK1G00042345	2	8.58674209015851e-62	1.72101e-59	GST4	EEC70603.1 hypothetical protein OsI_01840 [Oryza sativa Indica Group]	Metabolism;Metabolism	Global and overview maps;Metabolism of other amino acids	ko01100//Metabolic pathways;ko00480//Glutathione metabolism	K00799;K00799	-	GO:0005515//protein binding;GO:0016034//maleylacetoacetate isomerase activity	GO:0006559//L-phenylalanine catabolic process;GO:0006572//tyrosine catabolic process;GO:0006749//glutathione metabolic process
State 1,2 -vs- State 1,3	SK1G00042367	1	0	0	SALT	A2WPN7.2 RecName: Full=Salt stress-induced protein; Short=Salt protein; AltName: Full=Protein lectin-like; AltName: Full=Protein mannose-binding lectin [Oryza sativa Indica Group]	-	-	-	-	-	-	-
State 1,2 -vs- State 1,3	SK1G00042401	1	1.67982319586024e-321	4.23255663413633e-318	--	XP_006644148.2 PREDICTED: uncharacterized protein LOC102713129 isoform X1 [Oryza brachyantha]	-	-	-	-	-	-	-
State 1,2 -vs- State 1,3	SK1G00042408	5	2.80623193514848e-09	6.40711e-08	--	BAF13158.1 Os03g0745400, partial [Oryza sativa Japonica Group]	-	-	-	-	-	-	-
State 1,2 -vs- State 1,3	SK1G00042458	2	4.11216916631362e-14	1.36846e-12	NIN1	EAY73839.1 hypothetical protein OsI_01715 [Oryza sativa Indica Group]	-	-	-	-	-	GO:0033926//glycopeptide alpha-N-acetylgalactosaminidase activity	-
State 1,2 -vs- State 1,3	SK1G00042475	1	3.59675070992021e-09	8.16444e-08	--	EEC70549.1 hypothetical protein OsI_01693 [Oryza sativa Indica Group]	-	-	-	-	-	-	GO:0006952//defense response
State 1,2 -vs- State 1,3	SK1G00042482	2	0	0	PER1	XP_015621829.1 peroxidase 1 [Oryza sativa Japonica Group]	Metabolism;Metabolism;Metabolism	Global and overview maps;Global and overview maps;Biosynthesis of other secondary metabolites	ko01100//Metabolic pathways;ko01110//Biosynthesis of secondary metabolites;ko00940//Phenylpropanoid biosynthesis	K00430;K00430;K00430	-	GO:0004601//peroxidase activity;GO:0020037//heme binding	GO:0006979//response to oxidative stress;GO:0055114//oxidation-reduction process
State 1,2 -vs- State 1,3	SK1G00042483	2	1.53498615051525e-16	6.13907e-15	PER1	EEC70541.1 hypothetical protein OsI_01679 [Oryza sativa Indica Group]	Metabolism;Metabolism;Metabolism	Global and overview maps;Global and overview maps;Biosynthesis of other secondary metabolites	ko01100//Metabolic pathways;ko01110//Biosynthesis of secondary metabolites;ko00940//Phenylpropanoid biosynthesis	K00430;K00430;K00430	-	GO:0004601//peroxidase activity;GO:0020037//heme binding	GO:0006979//response to oxidative stress;GO:0055114//oxidation-reduction process
State 1,2 -vs- State 1,3	SK1G00042486	2	1.43089371456201e-09	3.38076e-08	PER1	EAY73797.1 hypothetical protein OsI_01676 [Oryza sativa Indica Group]	Metabolism;Metabolism;Metabolism	Global and overview maps;Global and overview maps;Biosynthesis of other secondary metabolites	ko01100//Metabolic pathways;ko01110//Biosynthesis of secondary metabolites;ko00940//Phenylpropanoid biosynthesis	K00430;K00430;K00430	-	GO:0004096//catalase activity;GO:0004601//peroxidase activity;GO:0020037//heme binding	GO:0006979//response to oxidative stress;GO:0055114//oxidation-reduction process
State 1,2 -vs- State 1,3	SK1G00042487	2	1.28413616583114e-14	4.46725e-13	PER1	XP_015626715.1 peroxidase 1 [Oryza sativa Japonica Group]	Metabolism;Metabolism;Metabolism	Global and overview maps;Global and overview maps;Biosynthesis of other secondary metabolites	ko01100//Metabolic pathways;ko01110//Biosynthesis of secondary metabolites;ko00940//Phenylpropanoid biosynthesis	K00430;K00430;K00430	-	GO:0004096//catalase activity;GO:0004601//peroxidase activity;GO:0020037//heme binding	GO:0006979//response to oxidative stress;GO:0055114//oxidation-reduction process
State 1,2 -vs- State 1,3	SK1G00042527	2	6.39156113390205e-15	2.28432e-13	SR30	EEC70512.1 hypothetical protein OsI_01613 [Oryza sativa Indica Group]	Genetic Information Processing	Transcription	ko03040//Spliceosome	K12890	-	GO:0003676//nucleic acid binding;GO:0003723//RNA binding	GO:0008380//RNA splicing
State 1,2 -vs- State 1,3	SK1G00042547	4	5.8515173276354e-21	3.03102e-19	PME41	XP_015625464.1 probable pectinesterase/pectinesterase inhibitor 41 [Oryza sativa Japonica Group]	Metabolism;Metabolism	Global and overview maps;Carbohydrate metabolism	ko01100//Metabolic pathways;ko00040//Pentose and glucuronate interconversions	K01051;K01051	-	GO:0004857//enzyme inhibitor activity;GO:0030599//pectinesterase activity	GO:0042545//cell wall modification
State 1,2 -vs- State 1,3	SK1G00042561	3	1.26803687708414e-12	3.81005e-11	--	-	-	-	-	-	-	-	-
State 1,2 -vs- State 1,3	SK1G00042577	4	1.14073978379899e-13	3.66146e-12	--	EEC70494.1 hypothetical protein OsI_01568 [Oryza sativa Indica Group]	-	-	-	-	-	GO:0003824//catalytic activity	-
State 1,2 -vs- State 1,3	SK1G00042590	4	5.94872774192944e-15	2.13688e-13	CP12-1	XP_015616280.1 calvin cycle protein CP12-1, chloroplastic [Oryza sativa Japonica Group]	-	-	-	-	-	-	-
State 1,2 -vs- State 1,3	SK1G00042647	2	4.64873678345894e-10	1.14036e-08	SPL1	EEC70457.1 hypothetical protein OsI_01492 [Oryza sativa Indica Group]	-	-	-	-	-	GO:0003677//DNA binding	-
State 1,2 -vs- State 1,3	SK1G00042654	2	6.47129991409742e-32	5.51389e-30	ABCB21	XP_015612048.1 ABC transporter B family member 21 [Oryza sativa Japonica Group]	Environmental Information Processing	Membrane transport	ko02010//ABC transporters	K05658	GO:0005575//cellular_component;GO:0005737//cytoplasm;GO:0005887//integral component of plasma membrane;GO:0009380//excinuclease repair complex;GO:0009898//cytoplasmic side of plasma membrane;GO:0016021//integral component of membrane;GO:0043190//ATP-binding cassette (ABC) transporter complex;GO:0055051//ATP-binding cassette (ABC) transporter complex, integrated substrate binding;GO:0055052//ATP-b…	GO:0003674//molecular_function;GO:0003676//nucleic acid binding;GO:0003924//GTPase activity;GO:0004020//adenylylsulfate kinase activity;GO:0004140//dephospho-CoA kinase activity;GO:0005260//channel-conductance-controlling ATPase activity;GO:0005319//lipid transporter activity;GO:0005524//ATP binding;GO:0005525//GTP binding;GO:0008565//protein transporter activity;GO:0009381//excinuclease ABC acti…	GO:0000910//cytokinesis;GO:0006289//nucleotide-excision repair;GO:0006412//translation;GO:0006614//SRP-dependent cotranslational protein targeting to membrane;GO:0006790//sulfur compound metabolic process;GO:0006810//transport;GO:0006817//phosphate ion transport;GO:0006824//cobalt ion transport;GO:0006855//drug transmembrane transport;GO:0006869//lipid transport;GO:0007186//G-protein coupled rece…
State 1,2 -vs- State 1,3	SK1G00042663	2	2.30749632937744e-10	5.86011e-09	--	XP_015645493.1 uncharacterized protein LOC107278289 [Oryza sativa Japonica Group]	-	-	-	-	-	-	-
State 1,2 -vs- State 1,3	SK1G00042670	3	2.69887640283321e-21	1.42519e-19	Cht10	EAY73581.1 hypothetical protein OsI_01465 [Oryza sativa Indica Group]	-	-	-	-	-	GO:0004568//chitinase activity	GO:0006032//chitin catabolic process;GO:0016998//cell wall macromolecule catabolic process
State 1,2 -vs- State 1,3	SK1G00042692	5	8.83229873086786e-23	5.05778e-21	--	EAY73546.1 hypothetical protein OsI_01429 [Oryza sativa Indica Group]	-	-	-	-	-	-	-
State 1,2 -vs- State 1,3	SK1G00042709	4	2.4190784908793e-14	8.2209e-13	EIF6-2	XP_015635348.1 eukaryotic translation initiation factor 6-2 isoform X2 [Oryza sativa Japonica Group]	Genetic Information Processing	Translation	ko03008//Ribosome biogenesis in eukaryotes	K03264	-	GO:0043022//ribosome binding	GO:0042256//mature ribosome assembly
State 1,2 -vs- State 1,3	SK1G00042720	5	6.8093347611704e-09	1.50407e-07	CRD1	XP_015622109.1 magnesium-protoporphyrin IX monomethyl ester [oxidative] cyclase, chloroplastic [Oryza sativa Japonica Group]	Metabolism;Metabolism;Metabolism	Global and overview maps;Global and overview maps;Metabolism of cofactors and vitamins	ko01100//Metabolic pathways;ko01110//Biosynthesis of secondary metabolites;ko00860//Porphyrin and chlorophyll metabolism	K04035;K04035;K04035	-	GO:0003677//DNA binding;GO:0003899//DNA-directed RNA polymerase activity;GO:0016491//oxidoreductase activity;GO:0045300//acyl-[acyl-carrier-protein] desaturase activity;GO:0046872//metal ion binding;GO:0048529//magnesium-protoporphyrin IX monomethyl ester (oxidative) cyclase activity	GO:0006351//transcription, DNA-templated;GO:0006631//fatty acid metabolic process;GO:0015995//chlorophyll biosynthetic process;GO:0055114//oxidation-reduction process
State 1,2 -vs- State 1,3	SK1G00042746	5	3.05603556216426e-08	6.28948e-07	RPL30	XP_015622112.1 60S ribosomal protein L30 [Oryza sativa Japonica Group]	Genetic Information Processing	Translation	ko03010//Ribosome	K02908	-	-	-
State 1,2 -vs- State 1,3	SK1G00042778	3	1.0555901281418e-16	4.25554e-15	Os01g0270100	XP_015621945.1 cysteine proteinase inhibitor 12 [Oryza sativa Japonica Group]	-	-	-	-	GO:0005886//plasma membrane;GO:0016021//integral component of membrane	GO:0004869//cysteine-type endopeptidase inhibitor activity	-
State 1,2 -vs- State 1,3	SK1G00042804	5	6.63769874752688e-17	2.72578e-15	--	EAY73426.1 hypothetical protein OsI_01306 [Oryza sativa Indica Group]	-	-	-	-	-	-	-
State 1,2 -vs- State 1,3	SK1G00042818	1	2.10776826474068e-80	6.46535e-78	SEC14	KAF2949528.1 hypothetical protein DAI22_01g117600 [Oryza sativa Japonica Group]	-	-	-	-	-	-	-
State 1,2 -vs- State 1,3	SK1G00042851	2	3.42678687469222e-29	2.66843e-27	PBL27	XP_015651260.1 probable serine/threonine-protein kinase PBL7 isoform X1 [Oryza sativa Japonica Group]	-	-	-	-	-	GO:0004672//protein kinase activity;GO:0005524//ATP binding	GO:0006468//protein phosphorylation
State 1,2 -vs- State 1,3	SK1G00042925	4	1.97911310155645e-09	4.61422e-08	WRKY6	XP_015622142.1 probable WRKY transcription factor 31 isoform X2 [Oryza sativa Japonica Group]	-	-	-	-	-	GO:0003700//transcription factor activity, sequence-specific DNA binding;GO:0043565//sequence-specific DNA binding	GO:0006355//regulation of transcription, DNA-templated;GO:0070206//protein trimerization
State 1,2 -vs- State 1,3	SK1G00042944	1	3.60744760991844e-09	8.18345e-08	At5g54860	XP_015621067.1 probable folate-biopterin transporter 4 [Oryza sativa Japonica Group]	-	-	-	-	-	GO:0022857//transmembrane transporter activity	GO:0055085//transmembrane transport
State 1,2 -vs- State 1,3	SK1G00042954	3	5.87278563589906e-20	2.90959e-18	GRXS3	XP_015644615.1 monothiol glutaredoxin-S3 [Oryza sativa Japonica Group]	-	-	-	-	-	GO:0009055//electron carrier activity;GO:0015035//protein disulfide oxidoreductase activity;GO:0015036//disulfide oxidoreductase activity	GO:0055114//oxidation-reduction process
State 1,2 -vs- State 1,3	SK1G00042960	1	3.70878665320843e-29	2.88166e-27	--	-	-	-	-	-	-	-	-
State 1,2 -vs- State 1,3	SK1G00042970	4	1.86405263372782e-17	7.87479e-16	TPT	XP_015619081.1 triose phosphate/phosphate translocator TPT, chloroplastic [Oryza sativa Japonica Group]	-	-	-	-	GO:0016020//membrane;GO:0016021//integral component of membrane	-	-
State 1,2 -vs- State 1,3	SK1G00042976	3	4.21196990936364e-10	1.039e-08	DAAT	XP_015621951.1 D-amino-acid transaminase, chloroplastic isoform X1 [Oryza sativa Japonica Group]	Metabolism	Metabolism of cofactors and vitamins	ko00790//Folate biosynthesis	K18482	-	GO:0003824//catalytic activity;GO:0004084//branched-chain-amino-acid transaminase activity;GO:0008696//4-amino-4-deoxychorismate lyase activity;GO:0047810//D-alanine:2-oxoglutarate aminotransferase activity	GO:0008153//para-aminobenzoic acid biosynthetic process;GO:0009082//branched-chain amino acid biosynthetic process;GO:0009396//folic acid-containing compound biosynthetic process;GO:0019480//L-alanine oxidation to pyruvate via D-alanine
State 1,2 -vs- State 1,3	SK1G00043046	2	4.35362340971416e-10	1.0712e-08	HPPR	EEC70231.1 hypothetical protein OsI_01001 [Oryza sativa Indica Group]	-	-	-	-	-	GO:0003824//catalytic activity;GO:0004616//phosphogluconate dehydrogenase (decarboxylating) activity;GO:0004617//phosphoglycerate dehydrogenase activity;GO:0016616//oxidoreductase activity, acting on the CH-OH group of donors, NAD or NADP as acceptor;GO:0016787//hydrolase activity;GO:0050661//NADP binding;GO:0051287//NAD binding	GO:0006098//pentose-phosphate shunt;GO:0006564//L-serine biosynthetic process;GO:0006813//potassium ion transport;GO:0030436//asexual sporulation;GO:0046168//glycerol-3-phosphate catabolic process;GO:0055114//oxidation-reduction process
State 1,2 -vs- State 1,3	SK1G00043053	1	1.74192923789556e-94	6.98256e-92	CYP736A117	OVA20835.1 Cytochrome P450 [Macleaya cordata]	-	-	-	-	GO:0016021//integral component of membrane	GO:0003674//molecular_function;GO:0005506//iron ion binding;GO:0005524//ATP binding;GO:0016705//oxidoreductase activity, acting on paired donors, with incorporation or reduction of molecular oxygen;GO:0020037//heme binding	GO:0009058//biosynthetic process;GO:0009252//peptidoglycan biosynthetic process;GO:0051301//cell division;GO:0055114//oxidation-reduction process
State 1,2 -vs- State 1,3	SK1G00043056	2	1.71579107753239e-26	1.19143e-24	RAB7	XP_015649338.1 ras-related protein Rab7 [Oryza sativa Japonica Group]	Cellular Processes;Cellular Processes	Transport and catabolism;Transport and catabolism	ko04144//Endocytosis;ko04145//Phagosome	K07897;K07897	GO:0005737//cytoplasm	GO:0000309//nicotinamide-nucleotide adenylyltransferase activity;GO:0003677//DNA binding;GO:0003723//RNA binding;GO:0003724//RNA helicase activity;GO:0003743//translation initiation factor activity;GO:0003746//translation elongation factor activity;GO:0003924//GTPase activity;GO:0005524//ATP binding;GO:0005525//GTP binding;GO:0017111//nucleoside-triphosphatase activity;GO:0043022//ribosome bindin…	GO:0006400//tRNA modification;GO:0006412//translation;GO:0006413//translational initiation;GO:0006414//translational elongation;GO:0006576//cellular biogenic amine metabolic process;GO:0009435//NAD biosynthetic process;GO:0032508//DNA duplex unwinding;GO:0042254//ribosome biogenesis;GO:0046336//ethanolamine catabolic process;GO:0051186//cofactor metabolic process
State 1,2 -vs- State 1,3	SK1G00043106	2	1.9733552729419e-10	5.02963e-09	GH3.12	BAD81367.1 putative Nt-gh3 deduced protein [Oryza sativa Japonica Group]	Environmental Information Processing	Signal transduction	ko04075//Plant hormone signal transduction	K14506	-	-	-
State 1,2 -vs- State 1,3	SK1G00043126	2	5.06178838717464e-65	1.12298e-62	BHLH51	XP_025879685.1 transcription factor bHLH30 [Oryza sativa Japonica Group]	-	-	-	-	-	GO:0008773//[protein-PII] uridylyltransferase activity;GO:0046983//protein dimerization activity	GO:0018177//protein uridylylation
State 1,2 -vs- State 1,3	SK1G00043146	2	2.74586150468803e-48	3.92147e-46	At5g45910	XP_015648138.1 GDSL esterase/lipase At5g45910 [Oryza sativa Japonica Group]	-	-	-	-	-	GO:0016788//hydrolase activity, acting on ester bonds	-
State 1,2 -vs- State 1,3	SK1G00043149	4	4.84134851597601e-09	1.08569e-07	GTE3	ONM28467.1 DUF455 family protein [Zea mays]	-	-	-	-	-	GO:0005515//protein binding	-
State 1,2 -vs- State 1,3	SK1G00043158	2	1.34333311957434e-60	2.5894e-58	BHLH41	EEC70105.1 hypothetical protein OsI_00760 [Oryza sativa Indica Group]	-	-	-	-	GO:0005876//spindle microtubule;GO:0042729//DASH complex	GO:0003700//transcription factor activity, sequence-specific DNA binding;GO:0004674//protein serine/threonine kinase activity;GO:0005524//ATP binding;GO:0046983//protein dimerization activity	GO:0006355//regulation of transcription, DNA-templated;GO:0006468//protein phosphorylation;GO:0008608//attachment of spindle microtubules to kinetochore
State 1,2 -vs- State 1,3	SK1G00043190	2	1.00883218175683e-19	4.96326e-18	HT1	EAY72920.1 hypothetical protein OsI_00793 [Oryza sativa Indica Group]	-	-	-	-	-	GO:0004413//homoserine kinase activity;GO:0004672//protein kinase activity;GO:0005524//ATP binding	GO:0006468//protein phosphorylation;GO:0009088//threonine biosynthetic process
State 1,2 -vs- State 1,3	SK1G00043204	2	1.31286958043642e-13	4.19488e-12	BZR2	EEC70129.1 hypothetical protein OsI_00807 [Oryza sativa Indica Group]	-	-	-	-	-	-	-
State 1,2 -vs- State 1,3	SK1G00043207	2	1.59639980670153e-18	7.32289e-17	--	XP_025879533.1 protein GRAVITROPIC IN THE LIGHT 1 [Oryza sativa Japonica Group]	-	-	-	-	-	-	-
State 1,2 -vs- State 1,3	SK1G00043247	3	4.9276955870958e-17	2.03066e-15	--	KAB8080461.1 hypothetical protein EE612_001000 [Oryza sativa]	-	-	-	-	-	-	-
State 1,2 -vs- State 1,3	SK1G00043260	1	8.46446958598515e-09	1.84996e-07	NCL1	KAB8080474.1 hypothetical protein EE612_001017 [Oryza sativa]	-	-	-	-	GO:0016021//integral component of membrane	GO:0005509//calcium ion binding;GO:0015368//calcium:cation antiporter activity	GO:0006816//calcium ion transport;GO:0055085//transmembrane transport
State 1,2 -vs- State 1,3	SK1G00043282	4	6.31987773921035e-13	1.93687e-11	TKI1	EEE53998.1 hypothetical protein OsJ_00639 [Oryza sativa Japonica Group]	-	-	-	-	-	-	-
State 1,2 -vs- State 1,3	SK1G00043315	5	2.1440265273432e-71	5.56088e-69	--	XP_015621643.1 protein ANTAGONIST OF LIKE HETEROCHROMATIN PROTEIN 1 [Oryza sativa Japonica Group]	-	-	-	-	-	GO:0003779//actin binding;GO:0016788//hydrolase activity, acting on ester bonds	GO:0007010//cytoskeleton organization
State 1,2 -vs- State 1,3	SK1G00043322	4	2.6599201326613e-08	5.51285e-07	hxnY	XP_015617743.1 2-oxoglutarate-Fe(II) type oxidoreductase hxnY isoform X3 [Oryza sativa Japonica Group]	-	-	-	-	-	GO:0016491//oxidoreductase activity	GO:0055114//oxidation-reduction process
State 1,2 -vs- State 1,3	SK1G00043334	5	3.44370720766721e-08	7.05031e-07	RPP2A	XP_015622106.1 60S acidic ribosomal protein P2A [Oryza sativa Japonica Group]	Genetic Information Processing	Translation	ko03010//Ribosome	K02943	-	-	GO:0009291//unidirectional conjugation
State 1,2 -vs- State 1,3	SK1G00043339	4	1.25359300236331e-36	1.22494e-34	PFK3	XP_015621540.1 ATP-dependent 6-phosphofructokinase 6 [Oryza sativa Japonica Group]	Metabolism;Metabolism;Metabolism;Metabolism;Metabolism;Genetic Information Processing;Metabolism;Metabolism;Metabolism	Global and overview maps;Global and overview maps;Global and overview maps;Global and overview maps;Carbohydrate metabolism;Folding, sorting and degradation;Carbohydrate metabolism;Carbohydrate metabolism;Carbohydrate metabolism	ko01100//Metabolic pathways;ko01110//Biosynthesis of secondary metabolites;ko01200//Carbon metabolism;ko01230//Biosynthesis of amino acids;ko00010//Glycolysis / Gluconeogenesis;ko03018//RNA degradation;ko00051//Fructose and mannose metabolism;ko00052//Galactose metabolism;ko00030//Pentose phosphate pathway	K00850;K00850;K00850;K00850;K00850;K00850;K00850;K00850;K00850	GO:0005575//cellular_component	GO:0001727//lipid kinase activity;GO:0003872//6-phosphofructokinase activity;GO:0016301//kinase activity;GO:0016773//phosphotransferase activity, alcohol group as acceptor;GO:0047334//diphosphate-fructose-6-phosphate 1-phosphotransferase activity	GO:0006096//glycolytic process;GO:0008150//biological_process
State 1,2 -vs- State 1,3	SK1G00043344	1	1.09470467364062e-59	2.04316e-57	KUA1	KAB8080324.1 hypothetical protein EE612_000779 [Oryza sativa]	-	-	-	-	-	-	-
State 1,2 -vs- State 1,3	SK1G00043373	5	5.71898869697998e-12	1.63881e-10	RHG1A	XP_015620967.1 E3 ubiquitin-protein ligase MBR1 [Oryza sativa Japonica Group]	-	-	-	-	GO:0000109//nucleotide-excision repair complex;GO:0005680//anaphase-promoting complex	GO:0008270//zinc ion binding;GO:0046872//metal ion binding;GO:0061630//ubiquitin protein ligase activity;GO:0097602//cullin family protein binding	GO:0006289//nucleotide-excision repair;GO:0031145//anaphase-promoting complex-dependent proteasomal ubiquitin-dependent protein catabolic process
State 1,2 -vs- State 1,3	SK1G00043400	4	2.70649524250099e-15	9.93461e-14	DREB2A	A2WL19.2 RecName: Full=Dehydration-responsive element-binding protein 2A; Short=Protein DREB2A [Oryza sativa Indica Group]	-	-	-	-	-	GO:0003700//transcription factor activity, sequence-specific DNA binding	GO:0006355//regulation of transcription, DNA-templated
State 1,2 -vs- State 1,3	SK1G00043415	2	2.54914708263328e-23	1.49869e-21	RIP30A	EAY72682.1 hypothetical protein OsI_00549 [Oryza sativa Indica Group]	-	-	-	-	-	GO:0030598//rRNA N-glycosylase activity	GO:0017148//negative regulation of translation
State 1,2 -vs- State 1,3	SK1G00043421	1	3.94932255089242e-08	8.02155e-07	NET4A	EAY72688.1 hypothetical protein OsI_00555 [Oryza sativa Indica Group]	-	-	-	-	GO:0005577//fibrinogen complex	GO:0003779//actin binding;GO:0005102//receptor binding;GO:0005524//ATP binding;GO:0043565//sequence-specific DNA binding	GO:0006355//regulation of transcription, DNA-templated;GO:0007030//Golgi organization;GO:0007059//chromosome segregation;GO:0007094//mitotic spindle assembly checkpoint;GO:0030168//platelet activation;GO:0030261//chromosome condensation;GO:0051258//protein polymerization
State 1,2 -vs- State 1,3	SK1G00043438	3	9.68852106471489e-255	1.79875e-251	RFS	EAY72704.1 hypothetical protein OsI_00571 [Oryza sativa Indica Group]	Metabolism;Metabolism	Global and overview maps;Carbohydrate metabolism	ko01100//Metabolic pathways;ko00052//Galactose metabolism	K06617;K06617	-	-	-
State 1,2 -vs- State 1,3	SK1G00043500	2	1.74643845961405e-32	1.52113e-30	AT7	EAY72776.1 hypothetical protein OsI_00639 [Oryza sativa Indica Group]	-	-	-	-	-	GO:0016747//transferase activity, transferring acyl groups other than amino-acyl groups	-
State 1,2 -vs- State 1,3	SK1G00043529	4	4.63019415086316e-30	3.69525e-28	NPF8.1	BAG91734.1 unnamed protein product, partial [Oryza sativa Japonica Group]	-	-	-	-	GO:0016020//membrane	GO:0015333//peptide:proton symporter activity;GO:0022857//transmembrane transporter activity	GO:0015833//peptide transport;GO:0055085//transmembrane transport
State 1,2 -vs- State 1,3	SK1G00043566	3	2.66463816205647e-21	1.40922e-19	--	EEC69944.1 hypothetical protein OsI_00395 [Oryza sativa Indica Group]	-	-	-	-	-	-	-
State 1,2 -vs- State 1,3	SK1G00043574	4	1.23753879769118e-08	2.65698e-07	H2B.10	XP_020164812.1 histone H2B.4-like [Aegilops tauschii subsp. tauschii] [Aegilops tauschii]	-	-	-	-	GO:0005669//transcription factor TFIID complex	GO:0003677//DNA binding	GO:0006352//DNA-templated transcription, initiation
State 1,2 -vs- State 1,3	SK1G00043578	2	3.05274891071596e-70	7.37573e-68	MT2A	-	-	-	-	-	-	GO:0008270//zinc ion binding;GO:0046872//metal ion binding	-
State 1,2 -vs- State 1,3	SK1G00043592	1	6.12065453370386e-70	1.46875e-67	H2B.6	BAK06939.1 predicted protein [Hordeum vulgare subsp. vulgare] [Hordeum vulgare]	-	-	-	-	GO:0005669//transcription factor TFIID complex	GO:0003677//DNA binding	GO:0006352//DNA-templated transcription, initiation
State 1,2 -vs- State 1,3	SK1G00043639	1	1.69056347332313e-101	7.54869e-99	--	XP_015640859.1 uncharacterized protein LOC4326042 [Oryza sativa Japonica Group]	-	-	-	-	GO:0016021//integral component of membrane	-	GO:0007155//cell adhesion;GO:0042246//tissue regeneration
State 1,2 -vs- State 1,3	SK1G00043640	2	5.07967712414254e-12	1.46036e-10	--	BAS70136.1 Os01g0121500, partial [Oryza sativa Japonica Group]	-	-	-	-	-	-	-
State 1,2 -vs- State 1,3	SK1G00043641	3	5.41740386374169e-15	1.94999e-13	--	XP_015640991.1 uncharacterized protein LOC4326044 [Oryza sativa Japonica Group]	-	-	-	-	-	-	-
State 1,2 -vs- State 1,3	SK1G00043666	2	5.05703972521665e-42	5.71753e-40	LPR1	XP_015625956.1 multicopper oxidase LPR1 homolog 1 [Oryza sativa Japonica Group]	-	-	-	-	-	GO:0005375//copper ion transmembrane transporter activity;GO:0005507//copper ion binding;GO:0016491//oxidoreductase activity	GO:0006825//copper ion transport;GO:0055114//oxidation-reduction process
State 1,2 -vs- State 1,3	SK1G00043672	2	2.99216394393573e-23	1.75622e-21	LPR5	XP_015634240.1 multicopper oxidase LPR1 homolog 3-like [Oryza sativa Japonica Group]	-	-	-	-	-	GO:0005375//copper ion transmembrane transporter activity;GO:0005507//copper ion binding;GO:0016491//oxidoreductase activity	GO:0006825//copper ion transport;GO:0055114//oxidation-reduction process
State 1,2 -vs- State 1,3	SK1G00043683	5	2.36245019170086e-10	5.99535e-09	MHZ4	XP_015614499.1 protein MAO HUZI 4, chloroplastic [Oryza sativa Japonica Group]	-	-	-	-	-	-	-
State 1,2 -vs- State 1,3	SK1G00043691	2	8.89260224440377e-11	2.3308e-09	MTP7	XP_015621370.1 metal tolerance protein 7 isoform X1 [Oryza sativa Japonica Group]	-	-	-	-	GO:0016020//membrane;GO:0016021//integral component of membrane	GO:0008324//cation transmembrane transporter activity;GO:0015562//efflux transmembrane transporter activity	GO:0006812//cation transport;GO:0055085//transmembrane transport
State 1,2 -vs- State 1,3	SK1G00043694	2	6.24805999357021e-65	1.3775e-62	--	EAY72397.1 hypothetical protein OsI_00250 [Oryza sativa Indica Group]	-	-	-	-	-	-	-
State 1,2 -vs- State 1,3	SK1G00043698	5	7.63577766638696e-14	2.4848e-12	--	BAS70220.1 Os01g0131600 [Oryza sativa Japonica Group]	-	-	-	-	-	-	-
State 1,2 -vs- State 1,3	SK1G00043699	2	2.01123862328428e-45	2.5338e-43	WIP1	XP_015622812.1 Bowman-Birk type wound-induced proteinase inhibitor WIP1 [Oryza sativa Japonica Group]	-	-	-	-	GO:0005576//extracellular region	GO:0004867//serine-type endopeptidase inhibitor activity	-
State 1,2 -vs- State 1,3	SK1G00043722	3	2.82715705763307e-76	8.10796e-74	CML16	XP_015620971.1 probable calcium-binding protein CML16 [Oryza sativa Japonica Group]	Organismal Systems	Environmental adaptation	ko04626//Plant-pathogen interaction	K13448	-	GO:0004553//hydrolase activity, hydrolyzing O-glycosyl compounds;GO:0005509//calcium ion binding;GO:0005515//protein binding	GO:0000272//polysaccharide catabolic process
State 1,2 -vs- State 1,3	SK1G00043724	3	2.359231410023e-11	6.47138e-10	HSP17.9B	KAB8079851.1 hypothetical protein EE612_000125 [Oryza sativa]	Genetic Information Processing	Folding, sorting and degradation	ko04141//Protein processing in endoplasmic reticulum	K13993	-	-	-
State 1,2 -vs- State 1,3	SK1G00043730	2	1.69322875560541e-16	6.74138e-15	LRK10L-1.2	EAY72439.1 hypothetical protein OsI_00293 [Oryza sativa Indica Group]	-	-	-	-	-	GO:0004672//protein kinase activity;GO:0005524//ATP binding;GO:0005525//GTP binding;GO:0030247//polysaccharide binding	GO:0006468//protein phosphorylation
State 1,2 -vs- State 1,3	SK1G00043755	2	5.80670374587609e-10	1.41069e-08	iolC	XP_015622025.1 uncharacterized protein LOC4326303 [Oryza sativa Japonica Group]	-	-	-	-	-	GO:0004747//ribokinase activity;GO:0008662//1-phosphofructokinase activity;GO:0009024//tagatose-6-phosphate kinase activity;GO:0016773//phosphotransferase activity, alcohol group as acceptor;GO:0047590//5-dehydro-2-deoxygluconokinase activity	GO:0005990//lactose catabolic process;GO:0009244//lipopolysaccharide core region biosynthetic process;GO:0019303//D-ribose catabolic process;GO:0019310//inositol catabolic process
State 1,2 -vs- State 1,3	SK1G00043774	5	5.26405544261063e-24	3.20707e-22	--	EAZ10240.1 hypothetical protein OsJ_00072 [Oryza sativa Japonica Group]	-	-	-	-	GO:0016021//integral component of membrane	GO:0005249//voltage-gated potassium channel activity;GO:0030955//potassium ion binding;GO:0046983//protein dimerization activity	GO:0006813//potassium ion transport
State 1,2 -vs- State 1,3	SK1G00043807	5	1.20228574720769e-57	2.13119e-55	--	-	-	-	-	-	-	GO:0003674//molecular_function	GO:0051205//protein insertion into membrane
State 1,2 -vs- State 1,3	SK1G00043834	4	3.16065439253803e-16	1.22789e-14	XAT3	XP_015622308.1 uncharacterized protein LOC4326077 isoform X1 [Oryza sativa Japonica Group]	-	-	-	-	-	-	-
State 1,2 -vs- State 1,3	SK1G00043836	2	1.15511837146048e-08	2.48608e-07	XAT3	XP_015622091.1 uncharacterized protein LOC4326083 isoform X1 [Oryza sativa Japonica Group]	-	-	-	-	-	-	-
State 1,2 -vs- State 1,3	SK1G00068535	4	1.00951817046549e-75	2.82625e-73	LTP110-A	XP_015615428.1 non-specific lipid-transfer protein 3 [Oryza sativa Japonica Group]	-	-	-	-	-	-	-
State 1,2 -vs- State 1,3	SK1G00068581	2	4.65471917152531e-33	4.12551e-31	VPS32.2	XP_015620601.1 vacuolar protein sorting-associated protein 32 homolog 2 [Oryza sativa Japonica Group]	Cellular Processes	Transport and catabolism	ko04144//Endocytosis	K12194	-	-	GO:0007034//vacuolar transport
State 1,2 -vs- State 1,3	SK1G00068582	2	1.80053919422904e-15	6.68569e-14	CIPK14	EAY82084.1 hypothetical protein OsI_37283 [Oryza sativa Indica Group]	-	-	-	-	-	GO:0003674//molecular_function;GO:0004672//protein kinase activity;GO:0005524//ATP binding;GO:0016709//oxidoreductase activity, acting on paired donors, with incorporation or reduction of molecular oxygen, NAD(P)H as one donor, and incorporation of one atom of oxygen	GO:0006468//protein phosphorylation;GO:0006744//ubiquinone biosynthetic process;GO:0007165//signal transduction;GO:0009306//protein secretion
State 1,2 -vs- State 1,3	SK1G00068628	1	3.72374259880155e-33	3.30869e-31	DFO	KAF2906244.1 hypothetical protein DAI22_12g004600 [Oryza sativa Japonica Group]	-	-	-	-	-	-	-
State 1,2 -vs- State 1,3	SK1G00068629	4	2.74311980480899e-08	5.67861e-07	FER1	EAY81986.1 hypothetical protein OsI_37168 [Oryza sativa Indica Group]	-	-	-	-	-	GO:0008199//ferric iron binding;GO:0016491//oxidoreductase activity;GO:0046872//metal ion binding	GO:0055114//oxidation-reduction process
State 1,2 -vs- State 1,3	SK1G00068639	5	3.18177703652751e-16	1.23473e-14	Os12g0104800	XP_015619821.1 clathrin heavy chain 2-like [Oryza sativa Japonica Group]	Cellular Processes	Transport and catabolism	ko04144//Endocytosis	K04646	GO:0030117//membrane coat;GO:0030130//clathrin coat of trans-Golgi network vesicle;GO:0030132//clathrin coat of coated pit	GO:0005198//structural molecule activity	GO:0006886//intracellular protein transport;GO:0016192//vesicle-mediated transport
State 1,2 -vs- State 1,3	SK1G00068646	5	1.1142459382014e-12	3.3594e-11	--	KAF2906221.1 hypothetical protein DAI22_12g002800 [Oryza sativa Japonica Group]	-	-	-	-	-	-	-
State 1,2 -vs- State 1,3	SK1G00068656	5	2.21138915024649e-21	1.17657e-19	TON1B	XP_015617663.1 protein TONNEAU 1a [Oryza sativa Japonica Group]	-	-	-	-	GO:0005815//microtubule organizing center	GO:0005515//protein binding	GO:0034453//microtubule anchoring
State 1,2 -vs- State 1,3	SK1G00068657	3	5.42680647640548e-10	1.3231e-08	At3g45770	XP_015619782.1 enoyl-[acyl-carrier-protein] reductase, mitochondrial [Oryza sativa Japonica Group]	Metabolism;Metabolism;Metabolism;Metabolism	Global and overview maps;Global and overview maps;Lipid metabolism;Lipid metabolism	ko01100//Metabolic pathways;ko01212//Fatty acid metabolism;ko00062//Fatty acid elongation;ko00061//Fatty acid biosynthesis	K07512;K07512;K07512;K07512	-	GO:0004024//alcohol dehydrogenase activity, zinc-dependent;GO:0008270//zinc ion binding;GO:0016491//oxidoreductase activity;GO:0016655//oxidoreductase activity, acting on NAD(P)H, quinone or similar compound as acceptor;GO:0051287//NAD binding	GO:0006113//fermentation;GO:0008152//metabolic process;GO:0055114//oxidation-reduction process
State 1,2 -vs- State 1,3	SK1G00068685	4	6.59979800541494e-24	3.99327e-22	IPMSA	XP_015619620.1 2-isopropylmalate synthase A [Oryza sativa Japonica Group]	Metabolism;Metabolism;Metabolism;Metabolism;Metabolism;Metabolism	Global and overview maps;Global and overview maps;Global and overview maps;Carbohydrate metabolism;Global and overview maps;Amino acid metabolism	ko01100//Metabolic pathways;ko01110//Biosynthesis of secondary metabolites;ko01230//Biosynthesis of amino acids;ko00620//Pyruvate metabolism;ko01210//2-Oxocarboxylic acid metabolism;ko00290//Valine, leucine and isoleucine biosynthesis	K01649;K01649;K01649;K01649;K01649;K01649	GO:0005737//cytoplasm	GO:0003824//catalytic activity;GO:0003852//2-isopropylmalate synthase activity;GO:0004410//homocitrate synthase activity;GO:0004736//pyruvate carboxylase activity;GO:0008701//4-hydroxy-2-oxovalerate aldolase activity;GO:0008948//oxaloacetate decarboxylase activity;GO:0015081//sodium ion transmembrane transporter activity;GO:0043714//(R)-citramalate synthase activity	GO:0006094//gluconeogenesis;GO:0006814//sodium ion transport;GO:0009097//isoleucine biosynthetic process;GO:0009098//leucine biosynthetic process;GO:0051188//cofactor biosynthetic process
State 1,2 -vs- State 1,3	SK1G00068694	4	1.09420119823005e-10	2.84436e-09	TAP46	EAY79895.1 hypothetical protein OsI_35058 [Oryza sativa Indica Group]	Cellular Processes	Transport and catabolism	ko04136//Autophagy - other eukaryotes	K17606	-	-	GO:0009966//regulation of signal transduction
State 1,2 -vs- State 1,3	SK1G00068696	4	1.39679923909146e-08	2.988e-07	CCDA2	XP_015620194.1 cytochrome c-type biogenesis ccda-like chloroplastic protein 2 [Oryza sativa Japonica Group]	-	-	-	-	GO:0016020//membrane	-	GO:0017004//cytochrome complex assembly;GO:0055114//oxidation-reduction process
State 1,2 -vs- State 1,3	SK1G00068741	4	8.34979718760253e-16	3.1705e-14	GFPT2	EEC68810.1 hypothetical protein OsI_37368 [Oryza sativa Indica Group]	Metabolism;Metabolism;Metabolism	Global and overview maps;Carbohydrate metabolism;Amino acid metabolism	ko01100//Metabolic pathways;ko00520//Amino sugar and nucleotide sugar metabolism;ko00250//Alanine, aspartate and glutamate metabolism	K00820;K00820;K00820	-	GO:0004044//amidophosphoribosyltransferase activity;GO:0004066//asparagine synthase (glutamine-hydrolyzing) activity;GO:0004360//glutamine-fructose-6-phosphate transaminase (isomerizing) activity;GO:0016835//carbon-oxygen lyase activity;GO:0097367//carbohydrate derivative binding	GO:0006040//amino sugar metabolic process;GO:0006529//asparagine biosynthetic process;GO:0009152//purine ribonucleotide biosynthetic process;GO:0009252//peptidoglycan biosynthetic process;GO:0009254//peptidoglycan turnover;GO:1901135//carbohydrate derivative metabolic process
State 1,2 -vs- State 1,3	SK1G00068767	4	3.48554411174726e-24	2.14577e-22	--	EEE52694.1 hypothetical protein OsJ_35091 [Oryza sativa Japonica Group]	-	-	-	-	-	-	-
State 1,2 -vs- State 1,3	SK1G00068791	5	1.34298397283415e-17	5.71457e-16	RPS16A	XP_015617880.1 40S ribosomal protein S16-like [Oryza sativa Japonica Group]	Genetic Information Processing	Translation	ko03010//Ribosome	K02960	GO:0005840//ribosome;GO:0022627//cytosolic small ribosomal subunit	GO:0003735//structural constituent of ribosome	GO:0006412//translation
State 1,2 -vs- State 1,3	SK1G00068795	2	2.41473081439771e-09	5.58555e-08	--	XP_015618073.1 uncharacterized protein LOC4351371 [Oryza sativa Japonica Group]	-	-	-	-	GO:0033180//proton-transporting V-type ATPase, V1 domain	-	GO:1902600//hydrogen ion transmembrane transport
State 1,2 -vs- State 1,3	SK1G00068841	2	3.12472102913775e-10	7.8118e-09	ROPGAP1	XP_015619660.1 rho GTPase-activating protein 4 [Oryza sativa Japonica Group]	-	-	-	-	-	-	GO:0007165//signal transduction
State 1,2 -vs- State 1,3	SK1G00068843	2	2.66273101732489e-10	6.71393e-09	Os12g0154700	RWR81871.1 putative germin-like protein 2-1 [Cinnamomum micranthum f. kanehirae]	-	-	-	-	-	GO:0000166//nucleotide binding;GO:0003677//DNA binding;GO:0004553//hydrolase activity, hydrolyzing O-glycosyl compounds	GO:0005975//carbohydrate metabolic process;GO:0006355//regulation of transcription, DNA-templated
State 1,2 -vs- State 1,3	SK1G00068872	5	2.02194367307061e-10	5.14975e-09	RPL26A	XP_015618223.1 60S ribosomal protein L26-1 [Oryza sativa Japonica Group]	Genetic Information Processing	Translation	ko03010//Ribosome	K02898	GO:0000315//organellar large ribosomal subunit;GO:0015934//large ribosomal subunit;GO:0022625//cytosolic large ribosomal subunit	GO:0003735//structural constituent of ribosome	GO:0006412//translation
State 1,2 -vs- State 1,3	SK1G00068889	4	8.91351793122833e-49	1.28336e-46	PSK5	EAY82259.1 hypothetical protein OsI_37465 [Oryza sativa Indica Group]	-	-	-	-	GO:0005576//extracellular region	GO:0008083//growth factor activity	GO:0006915//apoptotic process;GO:0007050//cell cycle arrest;GO:0008283//cell proliferation;GO:0008285//negative regulation of cell proliferation
State 1,2 -vs- State 1,3	SK1G00068893	3	4.95428156287136e-32	4.2418e-30	--	XP_015618631.1 uncharacterized protein LOC4351498 [Oryza sativa Japonica Group]	-	-	-	-	-	-	-
State 1,2 -vs- State 1,3	SK1G00068903	4	4.38921545726102e-12	1.27014e-10	OsI_37456	XP_015620584.1 pyruvate kinase 2, cytosolic [Oryza sativa Japonica Group]	Metabolism;Metabolism;Metabolism;Metabolism;Metabolism;Metabolism;Metabolism	Global and overview maps;Global and overview maps;Global and overview maps;Global and overview maps;Carbohydrate metabolism;Nucleotide metabolism;Carbohydrate metabolism	ko01100//Metabolic pathways;ko01110//Biosynthesis of secondary metabolites;ko01200//Carbon metabolism;ko01230//Biosynthesis of amino acids;ko00010//Glycolysis / Gluconeogenesis;ko00230//Purine metabolism;ko00620//Pyruvate metabolism	K00873;K00873;K00873;K00873;K00873;K00873;K00873	GO:0005737//cytoplasm	GO:0000287//magnesium ion binding;GO:0004743//pyruvate kinase activity;GO:0030955//potassium ion binding	GO:0006096//glycolytic process
State 1,2 -vs- State 1,3	SK1G00068908	2	1.21258626618445e-92	4.70044e-90	TSJT1	XP_015620578.1 stem-specific protein TSJT1 [Oryza sativa Japonica Group]	-	-	-	-	-	GO:0004044//amidophosphoribosyltransferase activity;GO:0004066//asparagine synthase (glutamine-hydrolyzing) activity	GO:0006529//asparagine biosynthetic process;GO:0009152//purine ribonucleotide biosynthetic process
State 1,2 -vs- State 1,3	SK1G00068941	4	1.42493367749944e-24	8.94387e-23	TMN1	XP_015620156.1 transmembrane 9 superfamily member 1 [Oryza sativa Japonica Group]	-	-	-	-	GO:0016021//integral component of membrane	-	-
State 1,2 -vs- State 1,3	SK1G00068948	2	3.60192348797168e-10	8.94774e-09	DIR3	EAY82438.1 hypothetical protein OsI_37651 [Oryza sativa Indica Group]	-	-	-	-	-	-	-
State 1,2 -vs- State 1,3	SK1G00068966	4	6.68886969125895e-51	1.01266e-48	CBP	XP_015618758.1 citrate-binding protein [Oryza sativa Japonica Group]	-	-	-	-	-	-	-
State 1,2 -vs- State 1,3	SK1G00069025	4	1.72247342993689e-12	5.1145e-11	PUB24	XP_015618963.1 E3 ubiquitin-protein ligase PUB23 [Oryza sativa Japonica Group]	-	-	-	-	-	GO:0004121//cystathionine beta-lyase activity;GO:0004842//ubiquitin-protein transferase activity;GO:0008270//zinc ion binding	GO:0009086//methionine biosynthetic process;GO:0016567//protein ubiquitination
State 1,2 -vs- State 1,3	SK1G00069076	4	1.23102169456135e-13	3.93693e-12	PPD4	XP_015618101.1 psbP domain-containing protein 4, chloroplastic [Oryza sativa Japonica Group]	-	-	-	-	GO:0009523//photosystem II;GO:0009654//photosystem II oxygen evolving complex;GO:0019898//extrinsic component of membrane	GO:0005509//calcium ion binding	GO:0015979//photosynthesis
State 1,2 -vs- State 1,3	SK1G00069087	4	2.97117881387235e-43	3.49361e-41	TRXM	KAF0888141.1 hypothetical protein E2562_010839 [Oryza meyeriana var. granulata] [Oryza meyeriana]	-	-	-	-	GO:0005737//cytoplasm	GO:0003756//protein disulfide isomerase activity;GO:0015036//disulfide oxidoreductase activity;GO:0016209//antioxidant activity;GO:0016491//oxidoreductase activity;GO:0016667//oxidoreductase activity, acting on a sulfur group of donors	GO:0006457//protein folding;GO:0006790//sulfur compound metabolic process;GO:0055114//oxidation-reduction process
State 1,2 -vs- State 1,3	SK1G00069108	1	3.38561340816492e-120	1.83735e-117	AAP3	EAY82481.1 hypothetical protein OsI_37698 [Oryza sativa Indica Group]	-	-	-	-	-	-	-
State 1,2 -vs- State 1,3	SK1G00069109	3	9.43672918204013e-46	1.20609e-43	AAP3	EEC68963.1 hypothetical protein OsI_37697 [Oryza sativa Indica Group]	-	-	-	-	-	-	-
State 1,2 -vs- State 1,3	SK1G00069221	2	9.8280604022654e-15	3.45648e-13	ADK-A	XP_015618268.1 adenylate kinase 3 [Oryza sativa Japonica Group]	Metabolism;Metabolism;Metabolism;Metabolism	Global and overview maps;Global and overview maps;Nucleotide metabolism;Metabolism of cofactors and vitamins	ko01100//Metabolic pathways;ko01110//Biosynthesis of secondary metabolites;ko00230//Purine metabolism;ko00730//Thiamine metabolism	K00939;K00939;K00939;K00939	GO:0000502//proteasome complex	GO:0004017//adenylate kinase activity;GO:0005524//ATP binding;GO:0009378//four-way junction helicase activity;GO:0016301//kinase activity;GO:0016887//ATPase activity	GO:0006281//DNA repair;GO:0006310//DNA recombination;GO:0009151//purine deoxyribonucleotide metabolic process;GO:0010498//proteasomal protein catabolic process;GO:0019941//modification-dependent protein catabolic process
State 1,2 -vs- State 1,3	SK1G00069226	4	6.04215026759362e-09	1.34048e-07	At4g24830	EAY82685.1 hypothetical protein OsI_37900 [Oryza sativa Indica Group]	Metabolism;Metabolism;Metabolism;Metabolism;Metabolism	Global and overview maps;Global and overview maps;Global and overview maps;Amino acid metabolism;Amino acid metabolism	ko01100//Metabolic pathways;ko01110//Biosynthesis of secondary metabolites;ko01230//Biosynthesis of amino acids;ko00250//Alanine, aspartate and glutamate metabolism;ko00220//Arginine biosynthesis	K01940;K01940;K01940;K01940;K01940	-	GO:0004055//argininosuccinate synthase activity;GO:0005524//ATP binding	GO:0006526//arginine biosynthetic process;GO:0008616//queuosine biosynthetic process;GO:0042450//arginine biosynthetic process via ornithine
State 1,2 -vs- State 1,3	SK1G00069281	2	7.69765277959841e-83	2.49114e-80	LAC25	XP_015618859.1 laccase-25-like [Oryza sativa Japonica Group]	-	-	-	-	-	GO:0003725//double-stranded RNA binding;GO:0005375//copper ion transmembrane transporter activity;GO:0005507//copper ion binding;GO:0016491//oxidoreductase activity	GO:0006825//copper ion transport;GO:0055114//oxidation-reduction process
State 1,2 -vs- State 1,3	SK1G00069284	4	1.29303532998515e-38	1.31446e-36	CBP1	KAF2907300.1 hypothetical protein DAI22_12g086600 [Oryza sativa Japonica Group]	-	-	-	-	-	GO:0004185//serine-type carboxypeptidase activity	GO:0006508//proteolysis
State 1,2 -vs- State 1,3	SK1G00069348	2	8.39604085866326e-143	5.48464e-140	CYP71P1	XP_015618264.1 tryptamine 5-hydroxylase [Oryza sativa Japonica Group]	-	-	-	-	-	GO:0005506//iron ion binding;GO:0016705//oxidoreductase activity, acting on paired donors, with incorporation or reduction of molecular oxygen;GO:0020037//heme binding	GO:0055114//oxidation-reduction process
State 1,2 -vs- State 1,3	SK1G00069454	5	1.14399064827023e-22	6.48782e-21	RBCS	XP_015619872.1 ribulose bisphosphate carboxylase small chain, chloroplastic [Oryza sativa Japonica Group]	Metabolism;Metabolism;Metabolism;Metabolism;Metabolism	Global and overview maps;Global and overview maps;Global and overview maps;Energy metabolism;Carbohydrate metabolism	ko01100//Metabolic pathways;ko01110//Biosynthesis of secondary metabolites;ko01200//Carbon metabolism;ko00710//Carbon fixation in photosynthetic organisms;ko00630//Glyoxylate and dicarboxylate metabolism	K01602;K01602;K01602;K01602;K01602	-	-	-
State 1,2 -vs- State 1,3	SK1G00069489	5	7.3797613192437e-17	3.01298e-15	RBCS-A	XP_015619409.1 ribulose bisphosphate carboxylase small chain A, chloroplastic-like [Oryza sativa Japonica Group]	Metabolism;Metabolism;Metabolism;Metabolism;Metabolism	Global and overview maps;Global and overview maps;Global and overview maps;Energy metabolism;Carbohydrate metabolism	ko01100//Metabolic pathways;ko01110//Biosynthesis of secondary metabolites;ko01200//Carbon metabolism;ko00710//Carbon fixation in photosynthetic organisms;ko00630//Glyoxylate and dicarboxylate metabolism	K01602;K01602;K01602;K01602;K01602	-	-	-
State 1,2 -vs- State 1,3	SK1G00069491	4	1.27075744410442e-148	8.96519e-146	RBCS-A	ASU47382.1 ribulose-1,5-bisphosphate carboxylase/oxygenase small subunit [Oryza punctata]	Metabolism;Metabolism;Metabolism;Metabolism;Metabolism	Global and overview maps;Global and overview maps;Global and overview maps;Energy metabolism;Carbohydrate metabolism	ko01100//Metabolic pathways;ko01110//Biosynthesis of secondary metabolites;ko01200//Carbon metabolism;ko00710//Carbon fixation in photosynthetic organisms;ko00630//Glyoxylate and dicarboxylate metabolism	K01602;K01602;K01602;K01602;K01602	-	-	-
State 1,2 -vs- State 1,3	SK1G00069552	2	3.539431416937e-17	1.47407e-15	--	KAB8117283.1 hypothetical protein EE612_059093 [Oryza sativa]	Genetic Information Processing	Translation	ko03008//Ribosome biogenesis in eukaryotes	K14565	GO:0005783//endoplasmic reticulum	GO:0008201//heparin binding;GO:0016758//transferase activity, transferring hexosyl groups;GO:0030515//snoRNA binding;GO:0050750//low-density lipoprotein particle receptor binding	GO:0000462//maturation of SSU-rRNA from tricistronic rRNA transcript (SSU-rRNA, 5.8S rRNA, LSU-rRNA);GO:0009247//glycolipid biosynthetic process
State 1,2 -vs- State 1,3	SK1G00069576	4	2.89572895155708e-26	1.99506e-24	CDKF-2	EAY82919.1 hypothetical protein OsI_38134 [Oryza sativa Indica Group]	-	-	-	-	-	GO:0004672//protein kinase activity;GO:0005524//ATP binding;GO:0016709//oxidoreductase activity, acting on paired donors, with incorporation or reduction of molecular oxygen, NAD(P)H as one donor, and incorporation of one atom of oxygen	GO:0006468//protein phosphorylation;GO:0006744//ubiquinone biosynthetic process
State 1,2 -vs- State 1,3	SK1G00069583	5	3.06863139934432e-83	1.02119e-80	HIPP39	EAY82913.1 hypothetical protein OsI_38128 [Oryza sativa Indica Group]	-	-	-	-	-	GO:0046872//metal ion binding	-
State 1,2 -vs- State 1,3	SK1G00069626	2	7.44258478690695e-09	1.63779e-07	--	EEC69199.1 hypothetical protein OsI_38190 [Oryza sativa Indica Group]	-	-	-	-	-	GO:0043531//ADP binding	-
State 1,2 -vs- State 1,3	SK1G00069631	2	1.1291567734839e-81	3.55634e-79	--	EEC69197.1 hypothetical protein OsI_38185 [Oryza sativa Indica Group]	-	-	-	-	-	GO:0004867//serine-type endopeptidase inhibitor activity	GO:0009611//response to wounding
State 1,2 -vs- State 1,3	SK1G00069645	4	1.2764075527928e-11	3.56213e-10	--	XP_015618742.1 uncharacterized protein LOC9272205 [Oryza sativa Japonica Group]	-	-	-	-	-	-	-
State 1,2 -vs- State 1,3	SK1G00069679	2	2.19927455293891e-14	7.50284e-13	DOX1	EAY82977.1 hypothetical protein OsI_38200 [Oryza sativa Indica Group]	Metabolism	Lipid metabolism	ko00592//alpha-Linolenic acid metabolism	K10529	-	-	-
State 1,2 -vs- State 1,3	SK1G00069692	3	5.27960003941577e-09	1.17723e-07	SOX	EEC69219.1 hypothetical protein OsI_38220 [Oryza sativa Indica Group]	Metabolism;Metabolism	Global and overview maps;Energy metabolism	ko01100//Metabolic pathways;ko00920//Sulfur metabolism	K00387;K00387	-	GO:0016491//oxidoreductase activity;GO:0030151//molybdenum ion binding	GO:0055114//oxidation-reduction process
State 1,2 -vs- State 1,3	SK1G00069698	2	1.26091994617434e-17	5.37835e-16	CYP94B1	EAY82999.1 hypothetical protein OsI_38222 [Oryza sativa Indica Group]	-	-	-	-	-	GO:0005506//iron ion binding;GO:0016705//oxidoreductase activity, acting on paired donors, with incorporation or reduction of molecular oxygen;GO:0020037//heme binding	GO:0055114//oxidation-reduction process
State 1,2 -vs- State 1,3	SK1G00069728	3	1.60215955797035e-14	5.51377e-13	--	EAY83039.1 hypothetical protein OsI_38256 [Oryza sativa Indica Group]	-	-	-	-	GO:0019031//viral envelope	-	-
State 1,2 -vs- State 1,3	SK1G00069815	3	1.95552862366264e-14	6.69721e-13	At5g13200	EAY83094.1 hypothetical protein OsI_38312 [Oryza sativa Indica Group]	-	-	-	-	-	-	-
State 1,2 -vs- State 1,3	SK1G00069818	5	1.83870578257929e-12	5.44784e-11	NAC083	EAY83089.1 hypothetical protein OsI_38306 [Oryza sativa Indica Group]	-	-	-	-	-	GO:0003677//DNA binding	GO:0006355//regulation of transcription, DNA-templated
State 1,2 -vs- State 1,3	SK1G00069865	4	3.58902016301885e-46	4.65451e-44	UPS2	XP_015619370.1 ureide permease 2 isoform X1 [Oryza sativa Japonica Group]	-	-	-	-	GO:0016021//integral component of membrane	GO:0015144//carbohydrate transmembrane transporter activity	GO:0034219//carbohydrate transmembrane transport;GO:0071705//nitrogen compound transport
State 1,2 -vs- State 1,3	SK1G00069870	4	4.01729243542463e-08	8.15362e-07	RBG3	EAY83219.1 hypothetical protein OsI_38428 [Oryza sativa Indica Group]	Genetic Information Processing	Transcription	ko03040//Spliceosome	K12741	-	GO:0003676//nucleic acid binding	GO:0008380//RNA splicing
State 1,2 -vs- State 1,3	SK1G00069991	2	3.9524453020421e-09	8.94307e-08	Os12g0514300	XP_015619442.1 CASP-like protein 2B1 [Oryza sativa Japonica Group]	-	-	-	-	-	-	-
State 1,2 -vs- State 1,3	SK1G00070035	5	2.24143068526137e-19	1.08014e-17	EIF-5A2	XP_015620359.1 eukaryotic translation initiation factor 5A-2 [Oryza sativa Japonica Group]	-	-	-	-	GO:0005737//cytoplasm	GO:0003723//RNA binding;GO:0003746//translation elongation factor activity;GO:0043022//ribosome binding	GO:0006414//translational elongation;GO:0045901//positive regulation of translational elongation;GO:0045905//positive regulation of translational termination
State 1,2 -vs- State 1,3	SK1G00070039	4	2.79065368840955e-09	6.37567e-08	--	XP_015620298.1 serine/arginine repetitive matrix protein 1 [Oryza sativa Japonica Group]	-	-	-	-	-	GO:0005516//calmodulin binding	-
State 1,2 -vs- State 1,3	SK1G00070108	2	1.14802161686403e-19	5.62451e-18	VIL1	XP_015620391.1 VIN3-like protein 1 [Oryza sativa Japonica Group]	-	-	-	-	-	GO:0005515//protein binding	-
State 1,2 -vs- State 1,3	SK1G00070140	2	9.94344163305443e-48	1.38638e-45	--	AAF85972.1 pathogenesis-related protein PR-10a [Oryza sativa Indica Group]	-	-	-	-	-	-	GO:0006952//defense response
State 1,2 -vs- State 1,3	SK1G00070141	2	6.06314362280804e-42	6.79277e-40	--	XP_015618805.1 major pollen allergen Bet v 1-G [Oryza sativa Japonica Group]	-	-	-	-	-	-	GO:0006952//defense response
State 1,2 -vs- State 1,3	SK1G00070142	2	1.04205569234303e-135	6.33767e-133	--	XP_015618351.1 major pollen allergen Bet v 1-D/H [Oryza sativa Japonica Group]	-	-	-	-	-	-	GO:0006952//defense response
State 1,2 -vs- State 1,3	SK1G00070158	5	6.02833823561175e-12	1.72186e-10	--	XP_015620581.1 universal stress protein PHOS34 isoform X2 [Oryza sativa Japonica Group]	-	-	-	-	-	-	-
State 1,2 -vs- State 1,3	SK1G00070177	4	1.363858035676e-15	5.10181e-14	--	TVU18501.1 hypothetical protein EJB05_34604, partial [Eragrostis curvula]	-	-	-	-	-	GO:0004867//serine-type endopeptidase inhibitor activity	GO:0006915//apoptotic process;GO:0007050//cell cycle arrest;GO:0008285//negative regulation of cell proliferation;GO:0009611//response to wounding
State 1,2 -vs- State 1,3	SK1G00070220	4	5.47724117543004e-09	1.21745e-07	SCL30	EEC69539.1 hypothetical protein OsI_38819 [Oryza sativa Indica Group]	Genetic Information Processing	Transcription	ko03040//Spliceosome	K12900	-	GO:0003676//nucleic acid binding	GO:0008380//RNA splicing
State 1,2 -vs- State 1,3	SK1G00070228	4	1.54438473409208e-12	4.6012e-11	MT4C	XP_015620236.1 metallothionein-like protein 4C [Oryza sativa Japonica Group]	-	-	-	-	-	GO:0008270//zinc ion binding;GO:0046872//metal ion binding	-
State 1,2 -vs- State 1,3	SK1G00070230	2	8.19459484814031e-56	1.35711e-53	MT4A	Q0IMG5.1 RecName: Full=Metallothionein-like protein 4A; AltName: Full=Class I metallothionein-like protein 4A; AltName: Full=OsMT-I-4a; AltName: Full=OsMT1b [Oryza sativa Japonica Group]	-	-	-	-	-	GO:0008270//zinc ion binding;GO:0046872//metal ion binding	-
State 1,2 -vs- State 1,3	SK1G00070244	1	6.92954122597344e-16	2.64259e-14	Os12g0568700	XP_015619416.1 CASP-like protein 4C1 [Oryza sativa Japonica Group]	-	-	-	-	GO:0005887//integral component of plasma membrane;GO:0043190//ATP-binding cassette (ABC) transporter complex	GO:0043216//daunorubicin-transporting ATPase activity	GO:0043215//daunorubicin transport
State 1,2 -vs- State 1,3	SK1G00070246	4	5.01333419089738e-16	1.92642e-14	MT4C	EAY83562.1 hypothetical protein OsI_38772 [Oryza sativa Indica Group]	-	-	-	-	-	GO:0046872//metal ion binding	-
State 1,2 -vs- State 1,3	SK1G00070247	5	2.30837401833348e-21	1.22632e-19	RPL8	XP_015619844.1 60S ribosomal protein L8 [Oryza sativa Japonica Group]	Genetic Information Processing	Translation	ko03010//Ribosome	K02938	GO:0000315//organellar large ribosomal subunit;GO:0005840//ribosome;GO:0022625//cytosolic large ribosomal subunit	GO:0003735//structural constituent of ribosome	GO:0006412//translation
State 1,2 -vs- State 1,3	SK1G00070256	2	8.30656316417774e-17	3.36798e-15	At5g03345	XP_015618425.1 membrane magnesium transporter [Oryza sativa Japonica Group]	-	-	-	-	-	-	-
State 1,2 -vs- State 1,3	SK1G00070301	2	2.60609861085206e-12	7.61011e-11	LOX2.1	XP_015620637.1 lipoxygenase 2.1, chloroplastic isoform X1 [Oryza sativa Japonica Group]	Metabolism;Metabolism;Metabolism;Metabolism	Global and overview maps;Global and overview maps;Lipid metabolism;Lipid metabolism	ko01100//Metabolic pathways;ko01110//Biosynthesis of secondary metabolites;ko00592//alpha-Linolenic acid metabolism;ko00591//Linoleic acid metabolism	K00454;K00454;K00454;K00454	-	GO:0005515//protein binding;GO:0016702//oxidoreductase activity, acting on single donors with incorporation of molecular oxygen, incorporation of two atoms of oxygen;GO:0046872//metal ion binding	GO:0055114//oxidation-reduction process
State 1,2 -vs- State 1,3	SK1G00070333	2	8.74152593169568e-61	1.7131e-58	SAPK9	EAY83693.1 hypothetical protein OsI_38916 [Oryza sativa Indica Group]	Environmental Information Processing;Environmental Information Processing	Signal transduction;Signal transduction	ko04075//Plant hormone signal transduction;ko04016//MAPK signaling pathway - plant	K14498;K14498	-	GO:0004672//protein kinase activity;GO:0005524//ATP binding	GO:0006468//protein phosphorylation
State 1,2 -vs- State 1,3	SK1G00070354	5	8.30820100338007e-09	1.81919e-07	CYP81Q32	XP_025877599.1 uncharacterized protein LOC9269725 [Oryza sativa Japonica Group]	-	-	-	-	-	GO:0005506//iron ion binding;GO:0016705//oxidoreductase activity, acting on paired donors, with incorporation or reduction of molecular oxygen;GO:0020037//heme binding;GO:0042626//ATPase activity, coupled to transmembrane movement of substances	GO:0044781//bacterial-type flagellum organization;GO:0055114//oxidation-reduction process
State 1,2 -vs- State 1,3	SK1G00070357	2	2.51634763431064e-09	5.80158e-08	--	ABA99135.2 seed maturation protein PM23, putative, expressed [Oryza sativa Japonica Group]	-	-	-	-	-	-	-
State 1,2 -vs- State 1,3	SK1G00070377	2	2.0853166929735e-21	1.11285e-19	At5g07830	EEC69565.1 hypothetical protein OsI_38868 [Oryza sativa Indica Group]	Metabolism;Metabolism	Global and overview maps;Glycan biosynthesis and metabolism	ko01100//Metabolic pathways;ko00531//Glycosaminoglycan degradation	K07964;K07964	GO:0016020//membrane	GO:0016798//hydrolase activity, acting on glycosyl bonds	-
State 1,2 -vs- State 1,3	SK1G00070414	4	2.92055658486974e-10	7.31695e-09	CML5	XP_015618906.1 calmodulin-like protein 5 [Oryza sativa Japonica Group]	Organismal Systems	Environmental adaptation	ko04626//Plant-pathogen interaction	K13448	GO:0030880//RNA polymerase complex	GO:0004553//hydrolase activity, hydrolyzing O-glycosyl compounds;GO:0005509//calcium ion binding;GO:0005515//protein binding	GO:0000272//polysaccharide catabolic process;GO:0006352//DNA-templated transcription, initiation
State 1,2 -vs- State 1,3	SK1G00070447	5	1.98653512201677e-08	4.17859e-07	UAH	XP_015620061.1 probable ureidoglycolate hydrolase [Oryza sativa Japonica Group]	Metabolism;Metabolism	Global and overview maps;Nucleotide metabolism	ko01100//Metabolic pathways;ko00230//Purine metabolism	K18151;K18151	-	GO:0004180//carboxypeptidase activity;GO:0004222//metalloendopeptidase activity;GO:0008777//acetylornithine deacetylase activity;GO:0016787//hydrolase activity;GO:0047652//allantoate deiminase activity	GO:0006508//proteolysis;GO:0006592//ornithine biosynthetic process;GO:0009442//allantoin assimilation pathway
State 1,2 -vs- State 1,3	SK1G00070475	5	4.06034234459378e-14	1.35249e-12	--	XP_015620323.1 uncharacterized protein LOC4352683 [Oryza sativa Japonica Group]	-	-	-	-	-	-	-
State 1,2 -vs- State 1,3	SK1G00070515	2	4.18854717312873e-31	3.53471e-29	--	EEE53592.1 hypothetical protein OsJ_36837 [Oryza sativa Japonica Group]	-	-	-	-	-	-	-
State 1,2 -vs- State 1,3	SK1G00070556	2	9.2244912676124e-34	8.30087e-32	CHX19	EEC69681.1 hypothetical protein OsI_39126 [Oryza sativa Indica Group]	-	-	-	-	GO:0016021//integral component of membrane	GO:0005451//monovalent cation:proton antiporter activity;GO:0015299//solute:proton antiporter activity	GO:0006812//cation transport;GO:0015992//proton transport;GO:0055085//transmembrane transport
State 1,2 -vs- State 1,3	SK1G00070577	2	8.84037093941256e-24	5.31251e-22	IQD1	XP_015618401.1 protein IQ-DOMAIN 1 isoform X1 [Oryza sativa Japonica Group]	-	-	-	-	-	GO:0005515//protein binding	-
State 1,2 -vs- State 1,3	SK1G00070599	2	3.71235319151994e-15	1.35003e-13	CAT2	XP_015619881.1 cationic amino acid transporter 2, vacuolar [Oryza sativa Japonica Group]	-	-	-	-	GO:0005739//mitochondrion;GO:0005887//integral component of plasma membrane;GO:0016020//membrane;GO:0016021//integral component of membrane	GO:0005275//amine transmembrane transporter activity;GO:0015171//amino acid transmembrane transporter activity;GO:0015495//gamma-aminobutyric acid:proton symporter activity;GO:0022857//transmembrane transporter activity;GO:0043858//arginine:ornithine antiporter activity	GO:0000266//mitochondrial fission;GO:0006527//arginine catabolic process;GO:0006810//transport;GO:0006865//amino acid transport;GO:0009450//gamma-aminobutyric acid catabolic process;GO:0015837//amine transport;GO:0055085//transmembrane transport
State 1,2 -vs- State 1,3	SK1G00070601	2	2.95006856650237e-22	1.64398e-20	Os12g0624000	ABG22095.1 5-methyltetrahydropteroyltriglutamate-homocysteine methyltransferase, putative, expressed [Oryza sativa Japonica Group]	Metabolism;Metabolism;Metabolism;Metabolism;Metabolism	Global and overview maps;Global and overview maps;Global and overview maps;Amino acid metabolism;Metabolism of other amino acids	ko01100//Metabolic pathways;ko01110//Biosynthesis of secondary metabolites;ko01230//Biosynthesis of amino acids;ko00270//Cysteine and methionine metabolism;ko00450//Selenocompound metabolism	K00549;K00549;K00549;K00549;K00549	-	GO:0003871//5-methyltetrahydropteroyltriglutamate-homocysteine S-methyltransferase activity;GO:0004357//glutamate-cysteine ligase activity;GO:0008270//zinc ion binding	GO:0006750//glutathione biosynthetic process;GO:0008652//cellular amino acid biosynthetic process;GO:0009086//methionine biosynthetic process
State 1,2 -vs- State 1,3	SK1G00070624	2	1.32642955890423e-11	3.69588e-10	Os12g0628600	EAY83985.1 hypothetical protein OsI_39211 [Oryza sativa Indica Group]	-	-	-	-	-	GO:0008233//peptidase activity	GO:0006508//proteolysis;GO:0016032//viral process
State 1,2 -vs- State 1,3	SK1G00070626	2	4.6042127860842e-19	2.18005e-17	Os12g0628600	XP_015618555.1 thaumatin-like protein [Oryza sativa Japonica Group]	-	-	-	-	-	-	-
State 1,2 -vs- State 1,3	SK1G00070644	5	3.7125362988476e-10	9.20954e-09	--	KAB8118325.1 hypothetical protein EE612_061091 [Oryza sativa]	-	-	-	-	-	-	-
State 1,2 -vs- State 1,3	SK1G00070646	4	6.67806302053141e-34	6.08705e-32	RBG7	AAB65412.1 glycine-rich protein [Oryza sativa Indica Group]	-	-	-	-	-	GO:0003676//nucleic acid binding	GO:0008380//RNA splicing
State 1,2 -vs- State 1,3	SK1G00070670	2	1.89788815366979e-09	4.44542e-08	--	EAY84023.1 hypothetical protein OsI_39255 [Oryza sativa Indica Group]	-	-	-	-	-	-	-
State 1,2 -vs- State 1,3	SK1G00070676	2	1.1019812263904e-23	6.57739e-22	BLH7	EAY84030.1 hypothetical protein OsI_39262 [Oryza sativa Indica Group]	-	-	-	-	-	GO:0003677//DNA binding	GO:0006355//regulation of transcription, DNA-templated;GO:0007165//signal transduction
State 1,2 -vs- State 1,3	SK1G00070680	2	9.85102032937784e-15	3.4611e-13	PAP2	RZC53871.1 hypothetical protein C5167_012728 [Papaver somniferum]	-	-	-	-	-	GO:0003993//acid phosphatase activity;GO:0005515//protein binding;GO:0016787//hydrolase activity;GO:0046872//metal ion binding	-
State 1,2 -vs- State 1,3	SK1G00070733	2	5.27134393168185e-35	4.93227e-33	NAC071	XP_015612876.1 NAC domain-containing protein 71 [Oryza sativa Japonica Group]	-	-	-	-	-	GO:0003677//DNA binding	GO:0006355//regulation of transcription, DNA-templated
State 1,2 -vs- State 1,3	SK1G00070751	4	1.48575671324384e-12	4.43777e-11	--	XP_015614789.1 uncharacterized protein LOC4349481 [Oryza sativa Japonica Group]	-	-	-	-	-	GO:0008270//zinc ion binding	-
State 1,2 -vs- State 1,3	SK1G00070768	5	4.445425073433e-15	1.60833e-13	--	XP_015612713.1 uncharacterized protein LOC4349493 [Oryza sativa Japonica Group]	-	-	-	-	-	GO:0005515//protein binding	-
State 1,2 -vs- State 1,3	SK1G00070777	4	2.17185703468695e-18	9.86001e-17	JMJ706	KAB8113837.1 hypothetical protein EE612_052981 [Oryza sativa]	-	-	-	-	-	-	-
State 1,2 -vs- State 1,3	SK1G00070789	1	5.53319704420396e-56	9.29445e-54	At5g17010	XP_015614520.1 D-xylose-proton symporter-like 2 [Oryza sativa Japonica Group]	-	-	-	-	GO:0005887//integral component of plasma membrane;GO:0016020//membrane;GO:0016021//integral component of membrane	GO:0008028//monocarboxylic acid transmembrane transporter activity;GO:0015114//phosphate ion transmembrane transporter activity;GO:0015238//drug transmembrane transporter activity;GO:0015295//solute:proton symporter activity;GO:0015307//drug:proton antiporter activity;GO:0022857//transmembrane transporter activity;GO:0042910//xenobiotic transporter activity;GO:0051119//sugar transmembrane transpo…	GO:0006810//transport;GO:0006817//phosphate ion transport;GO:0006855//drug transmembrane transport;GO:0008643//carbohydrate transport;GO:0015718//monocarboxylic acid transport;GO:0015893//drug transport;GO:0042493//response to drug;GO:0042908//xenobiotic transport;GO:0055085//transmembrane transport
State 1,2 -vs- State 1,3	SK1G00070802	4	4.69551831189958e-08	9.44863e-07	--	XP_015614477.1 uncharacterized protein LOC4349524 [Oryza sativa Japonica Group]	-	-	-	-	-	-	-
State 1,2 -vs- State 1,3	SK1G00070815	2	9.09924115815264e-39	9.27676e-37	POX2	XP_015612712.1 proline dehydrogenase 2, mitochondrial [Oryza sativa Japonica Group]	Metabolism;Metabolism;Metabolism	Global and overview maps;Global and overview maps;Amino acid metabolism	ko01100//Metabolic pathways;ko01110//Biosynthesis of secondary metabolites;ko00330//Arginine and proline metabolism	K00318;K00318;K00318	-	GO:0016740//transferase activity	-
State 1,2 -vs- State 1,3	SK1G00070825	4	4.30683237107384e-42	4.885e-40	At4g12490	EAY79459.1 hypothetical protein OsI_34590 [Oryza sativa Indica Group]	-	-	-	-	-	-	-
State 1,2 -vs- State 1,3	SK1G00070826	4	6.75686420602097e-25	4.27915e-23	PUB36	EAY79460.1 hypothetical protein OsI_34591 [Oryza sativa Indica Group]	-	-	-	-	-	GO:0004842//ubiquitin-protein transferase activity;GO:0042578//phosphoric ester hydrolase activity	GO:0008152//metabolic process;GO:0016567//protein ubiquitination
State 1,2 -vs- State 1,3	SK1G00070842	4	4.18420942573534e-19	1.98919e-17	PGSIP8	EAY79474.1 hypothetical protein OsI_34602 [Oryza sativa Indica Group]	-	-	-	-	-	GO:0016757//transferase activity, transferring glycosyl groups	GO:0006486//protein glycosylation
State 1,2 -vs- State 1,3	SK1G00070958	2	6.37244107346595e-14	2.08717e-12	HIPP39	XP_015612880.1 heavy metal-associated isoprenylated plant protein 39 [Oryza sativa Japonica Group]	-	-	-	-	-	GO:0003677//DNA binding;GO:0003700//transcription factor activity, sequence-specific DNA binding;GO:0016987//sigma factor activity;GO:0046872//metal ion binding	GO:0006352//DNA-templated transcription, initiation;GO:0006355//regulation of transcription, DNA-templated
State 1,2 -vs- State 1,3	SK1G00070965	3	4.63087034664809e-14	1.53528e-12	BETA-OHASE	EAY79324.1 hypothetical protein OsI_34454 [Oryza sativa Indica Group]	Metabolism;Metabolism;Metabolism	Global and overview maps;Global and overview maps;Metabolism of terpenoids and polyketides	ko01100//Metabolic pathways;ko01110//Biosynthesis of secondary metabolites;ko00906//Carotenoid biosynthesis	K15746;K15746;K15746	-	GO:0005506//iron ion binding;GO:0016491//oxidoreductase activity	GO:0008610//lipid biosynthetic process;GO:0055114//oxidation-reduction process
State 1,2 -vs- State 1,3	SK1G00070977	2	7.24299489912281e-21	3.73533e-19	--	EAY79339.1 hypothetical protein OsI_34469 [Oryza sativa Indica Group]	-	-	-	-	-	-	-
State 1,2 -vs- State 1,3	SK1G00070981	1	1.50678645118472e-49	2.22393e-47	F3H-2	XP_015614471.1 flavanone 3-dioxygenase 2-like [Oryza sativa Japonica Group]	-	-	-	-	-	GO:0016491//oxidoreductase activity	GO:0055114//oxidation-reduction process
State 1,2 -vs- State 1,3	SK1G00070995	3	3.90462561013266e-10	9.65888e-09	--	XP_015614454.1 uncharacterized protein LOC9269470 [Oryza sativa Japonica Group]	-	-	-	-	-	-	-
State 1,2 -vs- State 1,3	SK1G00071007	2	1.13542518783889e-15	4.2654e-14	PP2C27	EEC67377.1 hypothetical protein OsI_34505 [Oryza sativa Indica Group]	-	-	-	-	-	GO:0016791//phosphatase activity	-
State 1,2 -vs- State 1,3	SK1G00071020	2	4.20489589809739e-151	3.09016e-148	Cht8	EAY79390.1 hypothetical protein OsI_34517 [Oryza sativa Indica Group]	Metabolism;Environmental Information Processing;Metabolism	Global and overview maps;Signal transduction;Carbohydrate metabolism	ko01100//Metabolic pathways;ko04016//MAPK signaling pathway - plant;ko00520//Amino sugar and nucleotide sugar metabolism	K20547;K20547;K20547	-	GO:0004568//chitinase activity	GO:0006032//chitin catabolic process;GO:0016998//cell wall macromolecule catabolic process
State 1,2 -vs- State 1,3	SK1G00071025	3	8.74712475476194e-09	1.90819e-07	Dcaf8	KAF2914639.1 hypothetical protein DAI22_10g178700 [Oryza sativa Japonica Group]	-	-	-	-	-	GO:0005515//protein binding	-
State 1,2 -vs- State 1,3	SK1G00071039	2	2.14547401845037e-74	5.86679e-72	--	XP_015613770.1 pistil-specific extensin-like protein [Oryza sativa Japonica Group]	-	-	-	-	GO:0005886//plasma membrane	GO:0008374//O-acyltransferase activity	GO:0006654//phosphatidic acid biosynthetic process
State 1,2 -vs- State 1,3	SK1G00071064	1	3.30897963914522e-232	4.48939e-229	ACT2	XP_015614904.1 actin-2 [Oryza sativa Japonica Group]	-	-	-	-	-	-	-
State 1,2 -vs- State 1,3	SK1G00071077	2	7.59911246439175e-29	5.7896e-27	CYP84A1	KAB8113296.1 hypothetical protein EE612_052259 [Oryza sativa]	Metabolism;Metabolism;Metabolism	Global and overview maps;Global and overview maps;Biosynthesis of other secondary metabolites	ko01100//Metabolic pathways;ko01110//Biosynthesis of secondary metabolites;ko00940//Phenylpropanoid biosynthesis	K09755;K09755;K09755	-	GO:0005506//iron ion binding;GO:0016705//oxidoreductase activity, acting on paired donors, with incorporation or reduction of molecular oxygen;GO:0020037//heme binding	GO:0055114//oxidation-reduction process
State 1,2 -vs- State 1,3	SK1G00071091	4	2.61307695694143e-12	7.62418e-11	GDCSH	XP_015613006.1 glycine cleavage system H protein, mitochondrial [Oryza sativa Japonica Group]	Metabolism;Metabolism;Metabolism;Metabolism;Metabolism	Global and overview maps;Global and overview maps;Global and overview maps;Carbohydrate metabolism;Amino acid metabolism	ko01100//Metabolic pathways;ko01110//Biosynthesis of secondary metabolites;ko01200//Carbon metabolism;ko00630//Glyoxylate and dicarboxylate metabolism;ko00260//Glycine, serine and threonine metabolism	K02437;K02437;K02437;K02437;K02437	GO:0045254//pyruvate dehydrogenase complex	GO:0003824//catalytic activity;GO:0004742//dihydrolipoyllysine-residue acetyltransferase activity	GO:0006086//acetyl-CoA biosynthetic process from pyruvate;GO:0019464//glycine decarboxylation via glycine cleavage system
State 1,2 -vs- State 1,3	SK1G00071092	4	6.39342202541819e-09	1.41574e-07	OsI_16820	KAB8113322.1 hypothetical protein EE612_052285 [Oryza sativa]	-	-	-	-	-	GO:0004672//protein kinase activity;GO:0005524//ATP binding	GO:0006468//protein phosphorylation
State 1,2 -vs- State 1,3	SK1G00071098	2	5.41130725343663e-19	2.55534e-17	GTL1	KAF2914396.1 hypothetical protein DAI22_10g159300 [Oryza sativa Japonica Group]	-	-	-	-	GO:0005681//spliceosomal complex	GO:0043767//pyrrolysyl-tRNA synthetase activity	GO:0000398//mRNA splicing, via spliceosome;GO:0006418//tRNA aminoacylation for protein translation
State 1,2 -vs- State 1,3	SK1G00071104	1	7.16687611143988e-23	4.13767e-21	MGL	KAB8113335.1 hypothetical protein EE612_052304 [Oryza sativa]	Metabolism;Metabolism;Metabolism	Global and overview maps;Amino acid metabolism;Metabolism of other amino acids	ko01100//Metabolic pathways;ko00270//Cysteine and methionine metabolism;ko00450//Selenocompound metabolism	K01761;K01761;K01761	-	GO:0003824//catalytic activity;GO:0003961//O-acetylhomoserine aminocarboxypropyltransferase activity;GO:0004121//cystathionine beta-lyase activity;GO:0004124//cysteine synthase activity;GO:0008710//8-amino-7-oxononanoate synthase activity;GO:0016765//transferase activity, transferring alkyl or aryl (other than methyl) groups;GO:0016835//carbon-oxygen lyase activity;GO:0018826//methionine gamma-ly…	GO:0008652//cellular amino acid biosynthetic process;GO:0009058//biosynthetic process;GO:0009086//methionine biosynthetic process;GO:0009087//methionine catabolic process;GO:0009093//cysteine catabolic process;GO:0009102//biotin biosynthetic process;GO:0016226//iron-sulfur cluster assembly;GO:0019344//cysteine biosynthetic process;GO:0019346//transsulfuration;GO:0019413//acetate biosynthetic proc…
State 1,2 -vs- State 1,3	SK1G00071132	2	1.70113620096379e-21	9.17547e-20	--	XP_015612918.2 uncharacterized protein LOC4349144 isoform X1 [Oryza sativa Japonica Group]	-	-	-	-	-	GO:0003674//molecular_function;GO:0047570//3-oxoadipate enol-lactonase activity;GO:0070205//2-succinyl-6-hydroxy-2,4-cyclohexadiene-1-carboxylate synthase activity	GO:0009234//menaquinone biosynthetic process;GO:0015979//photosynthesis;GO:0042952//beta-ketoadipate pathway
State 1,2 -vs- State 1,3	SK1G00071133	2	7.92823361979482e-09	1.73923e-07	--	EEC67326.1 hypothetical protein OsI_34358 [Oryza sativa Indica Group]	-	-	-	-	-	GO:0003674//molecular_function;GO:0016787//hydrolase activity;GO:0047570//3-oxoadipate enol-lactonase activity	GO:0015979//photosynthesis;GO:0042952//beta-ketoadipate pathway
State 1,2 -vs- State 1,3	SK1G00071136	5	1.83299429757923e-09	4.29913e-08	RBL2	XP_015614650.1 RHOMBOID-like protein 2 [Oryza sativa Japonica Group]	-	-	-	-	GO:0005887//integral component of plasma membrane;GO:0016021//integral component of membrane	GO:0004252//serine-type endopeptidase activity	GO:0006464//cellular protein modification process;GO:0019538//protein metabolic process
State 1,2 -vs- State 1,3	SK1G00071137	4	3.77193053191856e-25	2.41918e-23	At4g00750	EAY79246.1 hypothetical protein OsI_34362 [Oryza sativa Indica Group]	-	-	-	-	-	GO:0008168//methyltransferase activity	-
State 1,2 -vs- State 1,3	SK1G00071160	2	2.97587360428543e-08	6.12808e-07	GSTU17	XP_024317192.1 LOW QUALITY PROTEIN: uncharacterized protein LOC100840442 [Brachypodium distachyon]	Metabolism;Metabolism	Global and overview maps;Metabolism of other amino acids	ko01100//Metabolic pathways;ko00480//Glutathione metabolism	K00799;K00799	-	GO:0005515//protein binding;GO:0015035//protein disulfide oxidoreductase activity;GO:0016034//maleylacetoacetate isomerase activity	GO:0006559//L-phenylalanine catabolic process;GO:0006572//tyrosine catabolic process;GO:0006749//glutathione metabolic process;GO:0006790//sulfur compound metabolic process;GO:0042965//glutaredoxin biosynthetic process;GO:0045454//cell redox homeostasis;GO:0055114//oxidation-reduction process
State 1,2 -vs- State 1,3	SK1G00071164	4	3.6833075181121e-35	3.45555e-33	GSTU6	EAY79285.1 hypothetical protein OsI_34411 [Oryza sativa Indica Group]	Metabolism;Metabolism	Global and overview maps;Metabolism of other amino acids	ko01100//Metabolic pathways;ko00480//Glutathione metabolism	K00799;K00799	-	GO:0005515//protein binding;GO:0016034//maleylacetoacetate isomerase activity	GO:0006559//L-phenylalanine catabolic process;GO:0006572//tyrosine catabolic process;GO:0006749//glutathione metabolic process
State 1,2 -vs- State 1,3	SK1G00071166	1	0	0	GSTU6	XP_015613723.1 uncharacterized protein LOC4349190 [Oryza sativa Japonica Group]	Metabolism;Metabolism	Global and overview maps;Metabolism of other amino acids	ko01100//Metabolic pathways;ko00480//Glutathione metabolism	K00799;K00799	-	GO:0005515//protein binding;GO:0016034//maleylacetoacetate isomerase activity	GO:0006559//L-phenylalanine catabolic process;GO:0006572//tyrosine catabolic process;GO:0006749//glutathione metabolic process
State 1,2 -vs- State 1,3	SK1G00071178	2	2.95154874139959e-11	8.03363e-10	--	EEC67221.1 hypothetical protein OsI_34133 [Oryza sativa Indica Group]	-	-	-	-	GO:0005737//cytoplasm	GO:0051540//metal cluster binding	GO:0008150//biological_process
State 1,2 -vs- State 1,3	SK1G00071181	4	1.90465446724698e-09	4.45535e-08	--	EAY79026.1 hypothetical protein OsI_34135 [Oryza sativa Indica Group]	-	-	-	-	-	-	-
State 1,2 -vs- State 1,3	SK1G00071192	3	1.04079841751605e-20	5.32089e-19	AGAL1	XP_015614153.1 alpha-galactosidase isoform X1 [Oryza sativa Japonica Group]	Metabolism;Metabolism;Metabolism;Metabolism;Metabolism	Global and overview maps;Lipid metabolism;Carbohydrate metabolism;Lipid metabolism;Glycan biosynthesis and metabolism	ko01100//Metabolic pathways;ko00561//Glycerolipid metabolism;ko00052//Galactose metabolism;ko00600//Sphingolipid metabolism;ko00603//Glycosphingolipid biosynthesis - globo and isoglobo series	K07407;K07407;K07407;K07407;K07407	-	GO:0004553//hydrolase activity, hydrolyzing O-glycosyl compounds	GO:0005975//carbohydrate metabolic process
State 1,2 -vs- State 1,3	SK1G00071232	1	6.81962696569235e-280	1.41507e-276	BC1L9	KAB8113178.1 hypothetical protein EE612_052108 [Oryza sativa]	-	-	-	-	GO:0031225//anchored component of membrane	-	GO:0010215//cellulose microfibril organization
State 1,2 -vs- State 1,3	SK1G00071263	2	6.67004404994903e-28	4.8916e-26	OsI_033071	EAY79112.1 hypothetical protein OsI_34217 [Oryza sativa Indica Group]	Metabolism;Metabolism;Metabolism	Global and overview maps;Global and overview maps;Metabolism of cofactors and vitamins	ko01100//Metabolic pathways;ko01110//Biosynthesis of secondary metabolites;ko00860//Porphyrin and chlorophyll metabolism	K02492;K02492;K02492	GO:0005737//cytoplasm	GO:0004616//phosphogluconate dehydrogenase (decarboxylating) activity;GO:0004764//shikimate 3-dehydrogenase (NADP+) activity;GO:0008641//small protein activating enzyme activity;GO:0008839//4-hydroxy-tetrahydrodipicolinate reductase;GO:0008883//glutamyl-tRNA reductase activity;GO:0016491//oxidoreductase activity;GO:0016616//oxidoreductase activity, acting on the CH-OH group of donors, NAD or NADP…	GO:0006098//pentose-phosphate shunt;GO:0006779//porphyrin-containing compound biosynthetic process;GO:0006813//potassium ion transport;GO:0008652//cellular amino acid biosynthetic process;GO:0009058//biosynthetic process;GO:0009089//lysine biosynthetic process via diaminopimelate;GO:0009228//thiamine biosynthetic process;GO:0009423//chorismate biosynthetic process;GO:0033014//tetrapyrrole biosynt…
State 1,2 -vs- State 1,3	SK1G00071264	4	1.9422365529219e-166	1.5225e-163	MSBP2	XP_015614353.1 membrane steroid-binding protein 2-like [Oryza sativa Japonica Group]	-	-	-	-	GO:0005840//ribosome	GO:0003735//structural constituent of ribosome	GO:0006412//translation
State 1,2 -vs- State 1,3	SK1G00071265	4	9.20594544426798e-13	2.80674e-11	--	BAC84393.1 hypothetical protein [Oryza sativa Japonica Group]	-	-	-	-	-	-	-
State 1,2 -vs- State 1,3	SK1G00071275	4	1.52747490250468e-12	4.55852e-11	Os02g0642300	XP_015613218.1 probable ascorbate-specific transmembrane electron transporter 1 [Oryza sativa Japonica Group]	-	-	-	-	-	-	-
State 1,2 -vs- State 1,3	SK1G00071282	3	4.00738041765407e-10	9.89918e-09	LTP-2	EAY79134.1 hypothetical protein OsI_34241 [Oryza sativa Indica Group]	-	-	-	-	-	-	-
State 1,2 -vs- State 1,3	SK1G00071286	2	3.50621341532142e-18	1.56361e-16	HIPP39	XP_015614979.1 heavy metal-associated isoprenylated plant protein 39 isoform X1 [Oryza sativa Japonica Group]	-	-	-	-	GO:0005777//peroxisome;GO:0016021//integral component of membrane	GO:0003677//DNA binding;GO:0003917//DNA topoisomerase type I activity;GO:0046872//metal ion binding	GO:0006265//DNA topological change;GO:0016560//protein import into peroxisome matrix, docking
State 1,2 -vs- State 1,3	SK1G00071311	3	1.18235890046049e-19	5.77669e-18	--	-	-	-	-	-	-	-	-
State 1,2 -vs- State 1,3	SK1G00071395	5	8.39626623162514e-09	1.8362e-07	Os10g0478200	XP_015614294.1 malate dehydrogenase, cytoplasmic [Oryza sativa Japonica Group]	Metabolism;Metabolism;Metabolism;Metabolism;Metabolism;Metabolism;Metabolism;Metabolism	Global and overview maps;Global and overview maps;Global and overview maps;Amino acid metabolism;Carbohydrate metabolism;Energy metabolism;Carbohydrate metabolism;Carbohydrate metabolism	ko01100//Metabolic pathways;ko01110//Biosynthesis of secondary metabolites;ko01200//Carbon metabolism;ko00270//Cysteine and methionine metabolism;ko00620//Pyruvate metabolism;ko00710//Carbon fixation in photosynthetic organisms;ko00630//Glyoxylate and dicarboxylate metabolism;ko00020//Citrate cycle (TCA cycle)	K00025;K00025;K00025;K00025;K00025;K00025;K00025;K00025	GO:0005737//cytoplasm	GO:0004459//L-lactate dehydrogenase activity;GO:0016491//oxidoreductase activity;GO:0016616//oxidoreductase activity, acting on the CH-OH group of donors, NAD or NADP as acceptor;GO:0030060//L-malate dehydrogenase activity	GO:0006099//tricarboxylic acid cycle;GO:0055114//oxidation-reduction process
State 1,2 -vs- State 1,3	SK1G00071405	3	9.96169526486974e-11	2.60088e-09	At1g04430	XP_015614117.1 probable methyltransferase PMT3 [Oryza sativa Japonica Group]	-	-	-	-	-	GO:0008168//methyltransferase activity;GO:0008171//O-methyltransferase activity	GO:0009102//biotin biosynthetic process
State 1,2 -vs- State 1,3	SK1G00071463	5	2.87930428228836e-61	5.70604e-59	RPL23A	NP_001132424.1 60S ribosomal protein L23-like [Zea mays]	Genetic Information Processing	Translation	ko03010//Ribosome	K02894	GO:0000315//organellar large ribosomal subunit;GO:0005840//ribosome;GO:0022625//cytosolic large ribosomal subunit	GO:0003735//structural constituent of ribosome	GO:0006412//translation
State 1,2 -vs- State 1,3	SK1G00071469	2	4.61176640239959e-08	9.28539e-07	--	XP_025876617.1 uncharacterized protein LOC112936645 [Oryza sativa Japonica Group]	-	-	-	-	-	-	-
State 1,2 -vs- State 1,3	SK1G00071482	3	8.16453320399377e-17	3.3142e-15	--	EEC67122.1 hypothetical protein OsI_33929 [Oryza sativa Indica Group]	-	-	-	-	-	-	-
State 1,2 -vs- State 1,3	SK1G00071515	4	1.14061465714122e-09	2.70762e-08	PED1	XP_015614832.1 3-ketoacyl-CoA thiolase 2, peroxisomal [Oryza sativa Japonica Group]	Metabolism;Metabolism;Cellular Processes;Metabolism;Metabolism;Metabolism;Metabolism;Metabolism	Global and overview maps;Global and overview maps;Transport and catabolism;Global and overview maps;Lipid metabolism;Lipid metabolism;Amino acid metabolism;Lipid metabolism	ko01100//Metabolic pathways;ko01110//Biosynthesis of secondary metabolites;ko04146//Peroxisome;ko01212//Fatty acid metabolism;ko00592//alpha-Linolenic acid metabolism;ko00071//Fatty acid degradation;ko00280//Valine, leucine and isoleucine degradation;ko01040//Biosynthesis of unsaturated fatty acids	K07513;K07513;K07513;K07513;K07513;K07513;K07513;K07513	-	GO:0003985//acetyl-CoA C-acetyltransferase activity;GO:0003988//acetyl-CoA C-acyltransferase activity;GO:0016747//transferase activity, transferring acyl groups other than amino-acyl groups;GO:0033817//beta-ketoacyl-acyl-carrier-protein synthase II activity	GO:0006631//fatty acid metabolic process;GO:0006633//fatty acid biosynthetic process;GO:0009062//fatty acid catabolic process
State 1,2 -vs- State 1,3	SK1G00071554	2	9.13933877829062e-09	1.98638e-07	GRP0.9	EEC84126.1 hypothetical protein OsI_30463 [Oryza sativa Indica Group]	-	-	-	-	-	-	-
State 1,2 -vs- State 1,3	SK1G00071604	2	8.36323565268132e-10	2.0028e-08	ABCG25	EEC67046.1 hypothetical protein OsI_33789 [Oryza sativa Indica Group]	-	-	-	-	GO:0005575//cellular_component;GO:0005887//integral component of plasma membrane;GO:0009380//excinuclease repair complex;GO:0009898//cytoplasmic side of plasma membrane;GO:0016020//membrane;GO:0016021//integral component of membrane;GO:0043190//ATP-binding cassette (ABC) transporter complex;GO:0055051//ATP-binding cassette (ABC) transporter complex, integrated substrate binding;GO:0055052//ATP-bi…	GO:0003723//RNA binding;GO:0003724//RNA helicase activity;GO:0003924//GTPase activity;GO:0005260//channel-conductance-controlling ATPase activity;GO:0005319//lipid transporter activity;GO:0005524//ATP binding;GO:0005525//GTP binding;GO:0008565//protein transporter activity;GO:0009381//excinuclease ABC activity;GO:0015220//choline transmembrane transporter activity;GO:0015221//lipopolysaccharide t…	GO:0000910//cytokinesis;GO:0002949//tRNA threonylcarbamoyladenosine modification;GO:0006289//nucleotide-excision repair;GO:0006810//transport;GO:0006817//phosphate ion transport;GO:0006824//cobalt ion transport;GO:0006869//lipid transport;GO:0007601//visual perception;GO:0008150//biological_process;GO:0008272//sulfate transport;GO:0015675//nickel cation transport;GO:0015689//molybdate ion transpo…
State 1,2 -vs- State 1,3	SK1G00071605	2	3.56719553859618e-27	2.54208e-25	PCRK2	EEC67045.1 hypothetical protein OsI_33788 [Oryza sativa Indica Group]	-	-	-	-	-	GO:0004672//protein kinase activity;GO:0005524//ATP binding	GO:0006468//protein phosphorylation
State 1,2 -vs- State 1,3	SK1G00071705	4	2.26472213683177e-13	7.14562e-12	ARD4	EAY78509.1 hypothetical protein OsI_33605 [Oryza sativa Indica Group]	Metabolism;Metabolism	Global and overview maps;Amino acid metabolism	ko01100//Metabolic pathways;ko00270//Cysteine and methionine metabolism	K08967;K08967	-	GO:0000334//3-hydroxyanthranilate 3,4-dioxygenase activity;GO:0005506//iron ion binding;GO:0010309//acireductone dioxygenase [iron(II)-requiring] activity;GO:0047869//dimethylpropiothetin dethiomethylase activity	GO:0006355//regulation of transcription, DNA-templated;GO:0055114//oxidation-reduction process
State 1,2 -vs- State 1,3	SK1G00071706	2	3.33812611526566e-15	1.21897e-13	ARD1	AAC05511.1 acireductone dioxygenase 1 [Oryza sativa]	Metabolism;Metabolism	Global and overview maps;Amino acid metabolism	ko01100//Metabolic pathways;ko00270//Cysteine and methionine metabolism	K08967;K08967	-	GO:0010309//acireductone dioxygenase [iron(II)-requiring] activity;GO:0047869//dimethylpropiothetin dethiomethylase activity	GO:0006355//regulation of transcription, DNA-templated;GO:0055114//oxidation-reduction process
State 1,2 -vs- State 1,3	SK1G00071713	2	2.78074943986578e-08	5.74976e-07	ACA7	XP_015613068.1 calcium-transporting ATPase 7, plasma membrane-type [Oryza sativa Japonica Group]	-	-	-	-	GO:0031004//potassium ion-transporting ATPase complex	GO:0004008//copper-exporting ATPase activity;GO:0004647//phosphoserine phosphatase activity;GO:0005375//copper ion transmembrane transporter activity;GO:0005388//calcium-transporting ATPase activity;GO:0008556//potassium-transporting ATPase activity;GO:0008967//phosphoglycolate phosphatase activity;GO:0015434//cadmium-transporting ATPase activity;GO:0015444//magnesium-importing ATPase activity;GO…	GO:0006545//glycine biosynthetic process;GO:0006564//L-serine biosynthetic process;GO:0006813//potassium ion transport;GO:0006816//calcium ion transport;GO:0006825//copper ion transport;GO:0008152//metabolic process;GO:0015691//cadmium ion transport;GO:0015693//magnesium ion transport;GO:0030001//metal ion transport
State 1,2 -vs- State 1,3	SK1G00071716	4	1.65413224439691e-65	3.74035e-63	OsI_032456	A2Z7B3.1 RecName: Full=GDP-mannose 3,5-epimerase 1; Short=GDP-Man 3,5-epimerase 1; AltName: Full=OsGME-1 [Oryza sativa Indica Group]	Metabolism;Metabolism;Metabolism;Metabolism	Global and overview maps;Global and overview maps;Carbohydrate metabolism;Carbohydrate metabolism	ko01100//Metabolic pathways;ko01110//Biosynthesis of secondary metabolites;ko00520//Amino sugar and nucleotide sugar metabolism;ko00053//Ascorbate and aldarate metabolism	K10046;K10046;K10046;K10046	-	GO:0003824//catalytic activity;GO:0003854//3-beta-hydroxy-delta5-steroid dehydrogenase activity;GO:0003978//UDP-glucose 4-epimerase activity;GO:0004316//3-oxoacyl-[acyl-carrier-protein] reductase (NADPH) activity;GO:0008460//dTDP-glucose 4,6-dehydratase activity;GO:0008667//2,3-dihydro-2,3-dihydroxybenzoate dehydrogenase activity;GO:0008712//ADP-glyceromanno-heptose 6-epimerase activity;GO:000883…	GO:0005975//carbohydrate metabolic process;GO:0006012//galactose metabolic process;GO:0006633//fatty acid biosynthetic process;GO:0006694//steroid biosynthetic process;GO:0009243//O antigen biosynthetic process;GO:0009244//lipopolysaccharide core region biosynthetic process;GO:0019305//dTDP-rhamnose biosynthetic process;GO:0055114//oxidation-reduction process
State 1,2 -vs- State 1,3	SK1G00071721	2	7.49564759325864e-10	1.80238e-08	--	TVU31060.1 hypothetical protein EJB05_22727, partial [Eragrostis curvula]	-	-	-	-	-	-	GO:0005975//carbohydrate metabolic process
State 1,2 -vs- State 1,3	SK1G00071747	5	4.0329350805037e-12	1.16799e-10	RPS17C	XP_015614780.1 40S ribosomal protein S17-3 [Oryza sativa Japonica Group]	Genetic Information Processing	Translation	ko03010//Ribosome	K02962	GO:0005840//ribosome;GO:0034464//BBSome	GO:0003735//structural constituent of ribosome	GO:0006412//translation
State 1,2 -vs- State 1,3	SK1G00071784	2	1.08509242611937e-08	2.34108e-07	CDF1	EEC66917.1 hypothetical protein OsI_33516 [Oryza sativa Indica Group]	-	-	-	-	-	GO:0003677//DNA binding	GO:0006355//regulation of transcription, DNA-templated
State 1,2 -vs- State 1,3	SK1G00071790	1	5.54126757799901e-35	5.17112e-33	--	EAY78420.1 hypothetical protein OsI_33510 [Oryza sativa Indica Group]	-	-	-	-	-	-	-
State 1,2 -vs- State 1,3	SK1G00071845	2	1.31601069347675e-29	1.04086e-27	RIPK	KAB8112629.1 hypothetical protein EE612_051219 [Oryza sativa]	-	-	-	-	-	GO:0004672//protein kinase activity;GO:0005524//ATP binding	GO:0006468//protein phosphorylation
State 1,2 -vs- State 1,3	SK1G00071851	2	3.49235736514677e-22	1.94005e-20	At1g28570	AAM22723.1 putative lipase [Oryza sativa Japonica Group]	-	-	-	-	-	GO:0016788//hydrolase activity, acting on ester bonds	-
State 1,2 -vs- State 1,3	SK1G00071872	2	2.74234117451933e-09	6.27342e-08	ALAAT2	XP_015614438.1 alanine aminotransferase 2 [Oryza sativa Japonica Group]	Metabolism;Metabolism;Metabolism;Metabolism;Metabolism;Metabolism;Metabolism	Global and overview maps;Global and overview maps;Global and overview maps;Energy metabolism;Amino acid metabolism;Global and overview maps;Amino acid metabolism	ko01100//Metabolic pathways;ko01200//Carbon metabolism;ko01230//Biosynthesis of amino acids;ko00710//Carbon fixation in photosynthetic organisms;ko00250//Alanine, aspartate and glutamate metabolism;ko01210//2-Oxocarboxylic acid metabolism;ko00220//Arginine biosynthesis	K00814;K00814;K00814;K00814;K00814;K00814;K00814	GO:0005737//cytoplasm	GO:0003824//catalytic activity;GO:0004400//histidinol-phosphate transaminase activity;GO:0004838//L-tyrosine:2-oxoglutarate aminotransferase activity;GO:0009016//succinyldiaminopimelate transaminase activity;GO:0030170//pyridoxal phosphate binding;GO:0047688//aspartate 4-decarboxylase activity;GO:0048472//threonine-phosphate decarboxylase activity	GO:0000105//histidine biosynthetic process;GO:0006531//aspartate metabolic process;GO:0006559//L-phenylalanine catabolic process;GO:0006572//tyrosine catabolic process;GO:0009058//biosynthetic process;GO:0009236//cobalamin biosynthetic process;GO:0019877//diaminopimelate biosynthetic process;GO:0042398//cellular modified amino acid biosynthetic process
State 1,2 -vs- State 1,3	SK1G00071907	2	2.54456735187968e-08	5.28931e-07	Os10g0370000	XP_015614734.1 probable protein phosphatase 2C 71 [Oryza sativa Japonica Group]	-	-	-	-	GO:0016020//membrane	GO:0004722//protein serine/threonine phosphatase activity;GO:0016791//phosphatase activity	GO:0030436//asexual sporulation
State 1,2 -vs- State 1,3	SK1G00071910	2	1.35827886400216e-08	2.90912e-07	KLLA0C05324g	XP_015614040.1 probable glucan 1,3-beta-glucosidase A [Oryza sativa Japonica Group]	-	-	-	-	-	GO:0004553//hydrolase activity, hydrolyzing O-glycosyl compounds;GO:0030674//protein binding, bridging;GO:0051015//actin filament binding	GO:0071704//organic substance metabolic process
State 1,2 -vs- State 1,3	SK1G00071913	5	2.41151686524281e-36	2.3499e-34	MGS1	XP_015612834.1 pollen-specific protein C13 [Oryza sativa Japonica Group]	-	-	-	-	-	-	-
State 1,2 -vs- State 1,3	SK1G00071956	2	1.37636116992345e-63	2.85595e-61	THT2	KAF2913361.1 hypothetical protein DAI22_10g078500 [Oryza sativa Japonica Group]	-	-	-	-	-	GO:0016747//transferase activity, transferring acyl groups other than amino-acyl groups	-
State 1,2 -vs- State 1,3	SK1G00072024	2	2.20350936779611e-11	6.06782e-10	--	AAM18723.1 putative elicitor inducible protein [Oryza sativa Japonica Group]	-	-	-	-	-	GO:0005515//protein binding	-
State 1,2 -vs- State 1,3	SK1G00072039	2	3.20118101078191e-12	9.28632e-11	--	KAF0928364.1 hypothetical protein E2562_003184 [Oryza meyeriana var. granulata] [Oryza meyeriana]	-	-	-	-	-	-	-
State 1,2 -vs- State 1,3	SK1G00072181	4	5.54464842834462e-13	1.7067e-11	RGA5	VAH73701.1 unnamed protein product [Triticum turgidum subsp. durum] [Triticum turgidum]	-	-	-	-	GO:0009379//Holliday junction helicase complex	GO:0003924//GTPase activity;GO:0005047//signal recognition particle binding;GO:0005525//GTP binding;GO:0009378//four-way junction helicase activity;GO:0043531//ADP binding	GO:0006281//DNA repair;GO:0006310//DNA recombination;GO:0009306//protein secretion
State 1,2 -vs- State 1,3	SK1G00072354	2	3.31827733568735e-13	1.03586e-11	Os10g0189600	KAB8112285.1 hypothetical protein EE612_050438 [Oryza sativa]	Metabolism;Metabolism	Global and overview maps;Lipid metabolism	ko01100//Metabolic pathways;ko00600//Sphingolipid metabolism	K00654;K00654	-	GO:0003824//catalytic activity;GO:0003870//5-aminolevulinate synthase activity;GO:0008710//8-amino-7-oxononanoate synthase activity;GO:0008890//glycine C-acetyltransferase activity;GO:0018826//methionine gamma-lyase activity;GO:0030170//pyridoxal phosphate binding	GO:0006567//threonine catabolic process;GO:0006783//heme biosynthetic process;GO:0009058//biosynthetic process;GO:0009087//methionine catabolic process;GO:0009093//cysteine catabolic process;GO:0009102//biotin biosynthetic process;GO:0019346//transsulfuration
State 1,2 -vs- State 1,3	SK1G00072531	2	9.36709928912975e-16	3.54153e-14	--	EAY77715.1 hypothetical protein OsI_32757 [Oryza sativa Indica Group]	-	-	-	-	-	-	-
State 1,2 -vs- State 1,3	SK1G00072563	5	9.14409689225139e-19	4.28364e-17	GALM	EAY77740.1 hypothetical protein OsI_32784 [Oryza sativa Indica Group]	Metabolism;Metabolism;Metabolism;Metabolism	Global and overview maps;Global and overview maps;Carbohydrate metabolism;Carbohydrate metabolism	ko01100//Metabolic pathways;ko01110//Biosynthesis of secondary metabolites;ko00010//Glycolysis / Gluconeogenesis;ko00052//Galactose metabolism	K01785;K01785;K01785;K01785	-	GO:0004034//aldose 1-epimerase activity;GO:0016853//isomerase activity	GO:0005975//carbohydrate metabolic process;GO:0006012//galactose metabolic process
State 1,2 -vs- State 1,3	SK1G00072704	5	8.07680895240024e-17	3.28237e-15	--	EAY77565.1 hypothetical protein OsI_32604 [Oryza sativa Indica Group]	-	-	-	-	-	-	-
State 1,2 -vs- State 1,3	SK1G00072792	4	6.55277397432257e-10	1.58538e-08	Os10g0113000	EAY77503.1 hypothetical protein OsI_32550 [Oryza sativa Indica Group]	-	-	-	-	-	GO:0047834//D-threo-aldose 1-dehydrogenase activity	-
State 1,2 -vs- State 1,3	SK1G00072887	2	3.68337585152068e-45	4.5912e-43	CCR1	EAZ08185.1 hypothetical protein OsI_30445 [Oryza sativa Indica Group]	Metabolism;Metabolism;Metabolism	Global and overview maps;Global and overview maps;Biosynthesis of other secondary metabolites	ko01100//Metabolic pathways;ko01110//Biosynthesis of secondary metabolites;ko00940//Phenylpropanoid biosynthesis	K09753;K09753;K09753	-	GO:0003824//catalytic activity;GO:0003854//3-beta-hydroxy-delta5-steroid dehydrogenase activity;GO:0003978//UDP-glucose 4-epimerase activity;GO:0008712//ADP-glyceromanno-heptose 6-epimerase activity;GO:0016616//oxidoreductase activity, acting on the CH-OH group of donors, NAD or NADP as acceptor;GO:0016757//transferase activity, transferring glycosyl groups;GO:0047733//CDP-glucose 4,6-dehydratase…	GO:0005975//carbohydrate metabolic process;GO:0006012//galactose metabolic process;GO:0006694//steroid biosynthetic process;GO:0009243//O antigen biosynthetic process;GO:0009244//lipopolysaccharide core region biosynthetic process;GO:0055114//oxidation-reduction process
State 1,2 -vs- State 1,3	SK1G00072968	5	1.38089853952766e-14	4.78029e-13	--	BAD52603.1 unknown protein [Oryza sativa Japonica Group]	-	-	-	-	-	-	-
State 1,2 -vs- State 1,3	SK1G00073015	2	6.81160748139829e-12	1.93462e-10	--	EAZ08248.1 hypothetical protein OsI_30504 [Oryza sativa Indica Group]	-	-	-	-	GO:0000109//nucleotide-excision repair complex;GO:0005680//anaphase-promoting complex	GO:0008270//zinc ion binding;GO:0016151//nickel cation binding;GO:0046872//metal ion binding;GO:0061630//ubiquitin protein ligase activity;GO:0097602//cullin family protein binding	GO:0006289//nucleotide-excision repair;GO:0031145//anaphase-promoting complex-dependent proteasomal ubiquitin-dependent protein catabolic process;GO:0051604//protein maturation
State 1,2 -vs- State 1,3	SK1G00073044	3	4.26207288809541e-09	9.62514e-08	CCR1	XP_015611438.1 cinnamoyl-CoA reductase 1-like [Oryza sativa Japonica Group]	Metabolism;Metabolism;Metabolism	Global and overview maps;Global and overview maps;Biosynthesis of other secondary metabolites	ko01100//Metabolic pathways;ko01110//Biosynthesis of secondary metabolites;ko00940//Phenylpropanoid biosynthesis	K09753;K09753;K09753	-	GO:0003824//catalytic activity;GO:0003854//3-beta-hydroxy-delta5-steroid dehydrogenase activity;GO:0003978//UDP-glucose 4-epimerase activity;GO:0004043//L-aminoadipate-semialdehyde dehydrogenase activity;GO:0004316//3-oxoacyl-[acyl-carrier-protein] reductase (NADPH) activity;GO:0008446//GDP-mannose 4,6-dehydratase activity;GO:0008460//dTDP-glucose 4,6-dehydratase activity;GO:0008667//2,3-dihydro-…	GO:0000271//polysaccharide biosynthetic process;GO:0005975//carbohydrate metabolic process;GO:0006012//galactose metabolic process;GO:0006633//fatty acid biosynthetic process;GO:0006694//steroid biosynthetic process;GO:0008152//metabolic process;GO:0009243//O antigen biosynthetic process;GO:0009244//lipopolysaccharide core region biosynthetic process;GO:0019305//dTDP-rhamnose biosynthetic process…
State 1,2 -vs- State 1,3	SK1G00073063	2	1.6820523907077e-10	4.30271e-09	SFH2	EEC84191.1 hypothetical protein OsI_30580 [Oryza sativa Indica Group]	-	-	-	-	-	GO:0043047//single-stranded telomeric DNA binding	-
State 1,2 -vs- State 1,3	SK1G00073065	3	2.61493013253426e-10	6.59812e-09	--	BAH94465.1 Os09g0257766 [Oryza sativa Japonica Group]	-	-	-	-	-	GO:0003676//nucleic acid binding;GO:0008270//zinc ion binding	-
State 1,2 -vs- State 1,3	SK1G00073076	2	3.30364839566624e-37	3.28271e-35	IGPS	XP_015612573.1 uncharacterized protein LOC4346529 isoform X2 [Oryza sativa Japonica Group]	Metabolism;Metabolism;Metabolism;Metabolism	Global and overview maps;Global and overview maps;Global and overview maps;Amino acid metabolism	ko01100//Metabolic pathways;ko01110//Biosynthesis of secondary metabolites;ko01230//Biosynthesis of amino acids;ko00400//Phenylalanine, tyrosine and tryptophan biosynthesis	K01609;K01609;K01609;K01609	-	GO:0004425//indole-3-glycerol-phosphate synthase activity	-
State 1,2 -vs- State 1,3	SK1G00073078	2	2.90083798261721e-77	8.45678e-75	Os09g0255200	XP_015612571.1 putative cysteine proteinase inhibitor 11 [Oryza sativa Japonica Group]	-	-	-	-	-	GO:0004869//cysteine-type endopeptidase inhibitor activity	-
State 1,2 -vs- State 1,3	SK1G00073084	2	3.02180948682657e-29	2.36876e-27	NOI4	EAZ08306.1 hypothetical protein OsI_30557 [Oryza sativa Indica Group]	-	-	-	-	-	-	-
State 1,2 -vs- State 1,3	SK1G00073090	2	1.47977566016832e-13	4.7239e-12	RGP1	XP_015612602.1 ras-related protein RGP1 [Oryza sativa Japonica Group]	Cellular Processes	Transport and catabolism	ko04144//Endocytosis	K07904	GO:0005737//cytoplasm	GO:0003677//DNA binding;GO:0003924//GTPase activity;GO:0005524//ATP binding;GO:0005525//GTP binding;GO:0043022//ribosome binding	GO:0006400//tRNA modification;GO:0032508//DNA duplex unwinding;GO:0042254//ribosome biogenesis
State 1,2 -vs- State 1,3	SK1G00073126	3	5.90006736370451e-09	1.31061e-07	--	KAB8109897.1 hypothetical protein EE612_046482, partial [Oryza sativa]	-	-	-	-	-	-	-
State 1,2 -vs- State 1,3	SK1G00073132	4	2.50791687489853e-13	7.87772e-12	--	-	-	-	-	-	-	-	-
State 1,2 -vs- State 1,3	SK1G00073299	2	5.23019591678496e-36	5.05466e-34	GFT1	XP_015612459.1 GDP-fucose transporter 1 [Oryza sativa Japonica Group]	-	-	-	-	-	-	-
State 1,2 -vs- State 1,3	SK1G00073431	4	3.07038134568982e-35	2.88821e-33	CAB1R	XP_015611833.1 chlorophyll a-b binding protein 1, chloroplastic [Oryza sativa Japonica Group]	Metabolism;Metabolism	Global and overview maps;Energy metabolism	ko01100//Metabolic pathways;ko00196//Photosynthesis - antenna proteins	K08912;K08912	-	-	-
State 1,2 -vs- State 1,3	SK1G00073449	4	2.594110120273e-09	5.9575e-08	--	EEE69514.1 hypothetical protein OsJ_28972 [Oryza sativa Japonica Group]	-	-	-	-	-	GO:0005515//protein binding	-
State 1,2 -vs- State 1,3	SK1G00073477	4	7.70124418804938e-25	4.86848e-23	ABCG53	EEC84379.1 hypothetical protein OsI_30931 [Oryza sativa Indica Group]	-	-	-	-	GO:0005575//cellular_component;GO:0005737//cytoplasm;GO:0005887//integral component of plasma membrane;GO:0009379//Holliday junction helicase complex;GO:0009380//excinuclease repair complex;GO:0009898//cytoplasmic side of plasma membrane;GO:0016020//membrane;GO:0016021//integral component of membrane;GO:0043190//ATP-binding cassette (ABC) transporter complex;GO:0055051//ATP-binding cassette (ABC)…	GO:0000166//nucleotide binding;GO:0003674//molecular_function;GO:0003924//GTPase activity;GO:0004385//guanylate kinase activity;GO:0004386//helicase activity;GO:0005319//lipid transporter activity;GO:0005524//ATP binding;GO:0005525//GTP binding;GO:0008565//protein transporter activity;GO:0009378//four-way junction helicase activity;GO:0009381//excinuclease ABC activity;GO:0015220//choline transme…	GO:0000910//cytokinesis;GO:0002949//tRNA threonylcarbamoyladenosine modification;GO:0006281//DNA repair;GO:0006289//nucleotide-excision repair;GO:0006310//DNA recombination;GO:0006400//tRNA modification;GO:0006464//cellular protein modification process;GO:0006576//cellular biogenic amine metabolic process;GO:0006810//transport;GO:0006817//phosphate ion transport;GO:0006824//cobalt ion transport;G…
State 1,2 -vs- State 1,3	SK1G00073493	2	7.01716730176418e-21	3.62417e-19	PAO6	XP_015611019.1 polyamine oxidase [Oryza sativa Japonica Group]	Metabolism;Metabolism;Metabolism	Global and overview maps;Amino acid metabolism;Metabolism of other amino acids	ko01100//Metabolic pathways;ko00330//Arginine and proline metabolism;ko00410//beta-Alanine metabolism	K13366;K13366;K13366	-	GO:0003824//catalytic activity;GO:0004729//oxygen-dependent protoporphyrinogen oxidase activity;GO:0008767//UDP-galactopyranose mutase activity;GO:0016166//phytoene dehydrogenase activity;GO:0016491//oxidoreductase activity;GO:0045550//geranylgeranyl reductase activity;GO:0050662//coenzyme binding	GO:0006779//porphyrin-containing compound biosynthetic process;GO:0009228//thiamine biosynthetic process;GO:0009273//peptidoglycan-based cell wall biogenesis;GO:0015995//chlorophyll biosynthetic process;GO:0016117//carotenoid biosynthetic process;GO:0030494//bacteriochlorophyll biosynthetic process;GO:0055114//oxidation-reduction process
State 1,2 -vs- State 1,3	SK1G00073496	2	1.20915999272184e-71	3.18307e-69	GSTU1	BAF24921.1 Os09g0367700, partial [Oryza sativa Japonica Group]	Metabolism;Metabolism	Global and overview maps;Metabolism of other amino acids	ko01100//Metabolic pathways;ko00480//Glutathione metabolism	K00799;K00799	-	GO:0005515//protein binding;GO:0015035//protein disulfide oxidoreductase activity;GO:0016034//maleylacetoacetate isomerase activity	GO:0006559//L-phenylalanine catabolic process;GO:0006572//tyrosine catabolic process;GO:0006749//glutathione metabolic process;GO:0006790//sulfur compound metabolic process;GO:0042965//glutaredoxin biosynthetic process;GO:0045454//cell redox homeostasis;GO:0055114//oxidation-reduction process
State 1,2 -vs- State 1,3	SK1G00073504	1	6.55927571674026e-116	3.45341e-113	RPPL1	EAZ44471.1 hypothetical protein OsJ_29088 [Oryza sativa Japonica Group]	-	-	-	-	-	GO:0005515//protein binding;GO:0043531//ADP binding	-
State 1,2 -vs- State 1,3	SK1G00073541	3	3.83479583567467e-08	7.81019e-07	--	ABG22566.1 expressed protein [Oryza sativa Japonica Group]	-	-	-	-	-	-	-
State 1,2 -vs- State 1,3	SK1G00073574	1	2.01614072836561e-17	8.46659e-16	EBS	XP_015651191.1 chromatin remodeling protein EBS isoform X1 [Oryza sativa Japonica Group]	-	-	-	-	-	GO:0003682//chromatin binding;GO:0005525//GTP binding	-
State 1,2 -vs- State 1,3	SK1G00073628	2	2.91669023936004e-08	6.00971e-07	TPS10	AEB53186.1 trehalose-6-phosphate synthase 11 [Oryza sativa Indica Group]	Metabolism;Metabolism;Metabolism	Global and overview maps;Global and overview maps;Carbohydrate metabolism	ko01100//Metabolic pathways;ko01110//Biosynthesis of secondary metabolites;ko00500//Starch and sucrose metabolism	K16055;K16055;K16055	-	GO:0003824//catalytic activity;GO:0003825//alpha,alpha-trehalose-phosphate synthase (UDP-forming) activity;GO:0004805//trehalose-phosphatase activity;GO:0016787//hydrolase activity;GO:0033828//glucosylglycerol-phosphate synthase activity	GO:0005992//trehalose biosynthetic process;GO:0006970//response to osmotic stress;GO:0008152//metabolic process
State 1,2 -vs- State 1,3	SK1G00073641	2	1.61829031142973e-10	4.14562e-09	ENO1	EAZ08879.1 hypothetical protein OsI_31140 [Oryza sativa Indica Group]	Metabolism;Metabolism;Metabolism;Metabolism;Metabolism;Genetic Information Processing	Global and overview maps;Global and overview maps;Global and overview maps;Global and overview maps;Carbohydrate metabolism;Folding, sorting and degradation	ko01100//Metabolic pathways;ko01110//Biosynthesis of secondary metabolites;ko01200//Carbon metabolism;ko01230//Biosynthesis of amino acids;ko00010//Glycolysis / Gluconeogenesis;ko03018//RNA degradation	K01689;K01689;K01689;K01689;K01689;K01689	-	GO:0004634//phosphopyruvate hydratase activity;GO:0016836//hydro-lyase activity	GO:0006096//glycolytic process;GO:0009234//menaquinone biosynthetic process
State 1,2 -vs- State 1,3	SK1G00073667	2	5.41805461603663e-14	1.78452e-12	ANN5	XP_015612521.1 annexin D5 [Oryza sativa Japonica Group]	-	-	-	-	-	GO:0005509//calcium ion binding;GO:0005544//calcium-dependent phospholipid binding	-
State 1,2 -vs- State 1,3	SK1G00073715	2	1.41418941395341e-14	4.88639e-13	ZHD9	XP_015610599.1 zinc-finger homeodomain protein 9 [Oryza sativa Japonica Group]	-	-	-	-	-	-	-
State 1,2 -vs- State 1,3	SK1G00073782	2	4.14505487322622e-11	1.11531e-09	TIFY6B	XP_015612402.1 protein TIFY 6b [Oryza sativa Japonica Group]	Environmental Information Processing	Signal transduction	ko04075//Plant hormone signal transduction	K13464	-	-	-
State 1,2 -vs- State 1,3	SK1G00073790	1	1.5771630070883e-11	4.36691e-10	RLK902	KAB8110410.1 hypothetical protein EE612_047638 [Oryza sativa]	-	-	-	-	-	GO:0004672//protein kinase activity;GO:0005515//protein binding;GO:0005524//ATP binding	GO:0006468//protein phosphorylation
State 1,2 -vs- State 1,3	SK1G00073791	2	1.78899291411146e-21	9.60529e-20	CAD8D	XP_015610813.1 probable cinnamyl alcohol dehydrogenase 8D [Oryza sativa Japonica Group]	Metabolism;Metabolism;Metabolism	Global and overview maps;Global and overview maps;Biosynthesis of other secondary metabolites	ko01100//Metabolic pathways;ko01110//Biosynthesis of secondary metabolites;ko00940//Phenylpropanoid biosynthesis	K00083;K00083;K00083	-	GO:0004024//alcohol dehydrogenase activity, zinc-dependent;GO:0004617//phosphoglycerate dehydrogenase activity;GO:0008270//zinc ion binding;GO:0008743//L-threonine 3-dehydrogenase activity;GO:0016491//oxidoreductase activity;GO:0016655//oxidoreductase activity, acting on NAD(P)H, quinone or similar compound as acceptor;GO:0018467//formaldehyde dehydrogenase activity;GO:0050607//mycothiol-dependen…	GO:0006113//fermentation;GO:0006564//L-serine biosynthetic process;GO:0006567//threonine catabolic process;GO:0008152//metabolic process;GO:0009404//toxin metabolic process;GO:0010127//mycothiol-dependent detoxification;GO:0019439//aromatic compound catabolic process;GO:0030494//bacteriochlorophyll biosynthetic process;GO:0046292//formaldehyde metabolic process;GO:0055114//oxidation-reduction pro…
State 1,2 -vs- State 1,3	SK1G00073794	2	4.7070232953811e-18	2.08593e-16	CAD8B	XP_015612230.1 probable cinnamyl alcohol dehydrogenase 8B [Oryza sativa Japonica Group]	Metabolism;Metabolism;Metabolism	Global and overview maps;Global and overview maps;Biosynthesis of other secondary metabolites	ko01100//Metabolic pathways;ko01110//Biosynthesis of secondary metabolites;ko00940//Phenylpropanoid biosynthesis	K00083;K00083;K00083	-	GO:0004024//alcohol dehydrogenase activity, zinc-dependent;GO:0004617//phosphoglycerate dehydrogenase activity;GO:0008270//zinc ion binding;GO:0008743//L-threonine 3-dehydrogenase activity;GO:0016491//oxidoreductase activity;GO:0016655//oxidoreductase activity, acting on NAD(P)H, quinone or similar compound as acceptor;GO:0018467//formaldehyde dehydrogenase activity;GO:0050607//mycothiol-dependen…	GO:0006113//fermentation;GO:0006564//L-serine biosynthetic process;GO:0006567//threonine catabolic process;GO:0006631//fatty acid metabolic process;GO:0008152//metabolic process;GO:0009404//toxin metabolic process;GO:0010127//mycothiol-dependent detoxification;GO:0019439//aromatic compound catabolic process;GO:0030494//bacteriochlorophyll biosynthetic process;GO:0046292//formaldehyde metabolic pr…
State 1,2 -vs- State 1,3	SK1G00073795	2	2.12223111480596e-201	2.20181e-198	CAD8A	XP_015651435.1 probable cinnamyl alcohol dehydrogenase 8A [Oryza sativa Japonica Group]	Metabolism;Metabolism;Metabolism	Global and overview maps;Global and overview maps;Biosynthesis of other secondary metabolites	ko01100//Metabolic pathways;ko01110//Biosynthesis of secondary metabolites;ko00940//Phenylpropanoid biosynthesis	K00083;K00083;K00083	-	GO:0004024//alcohol dehydrogenase activity, zinc-dependent;GO:0004617//phosphoglycerate dehydrogenase activity;GO:0008270//zinc ion binding;GO:0008743//L-threonine 3-dehydrogenase activity;GO:0016491//oxidoreductase activity;GO:0016655//oxidoreductase activity, acting on NAD(P)H, quinone or similar compound as acceptor;GO:0018467//formaldehyde dehydrogenase activity;GO:0050607//mycothiol-dependen…	GO:0006113//fermentation;GO:0006564//L-serine biosynthetic process;GO:0006567//threonine catabolic process;GO:0008152//metabolic process;GO:0009404//toxin metabolic process;GO:0010127//mycothiol-dependent detoxification;GO:0019439//aromatic compound catabolic process;GO:0030494//bacteriochlorophyll biosynthetic process;GO:0046292//formaldehyde metabolic process;GO:0055114//oxidation-reduction pro…
State 1,2 -vs- State 1,3	SK1G00073811	1	9.59381078056588e-48	1.34294e-45	VIT2	XP_015610875.1 vacuolar iron transporter 1.2 [Oryza sativa Japonica Group]	-	-	-	-	-	GO:0005384//manganese ion transmembrane transporter activity	GO:0030026//cellular manganese ion homeostasis
State 1,2 -vs- State 1,3	SK1G00073817	4	2.36206433399458e-15	8.7248e-14	GLR2.9	OEL24842.1 Glutamate receptor 2.8 [Dichanthelium oligosanthes]	-	-	-	-	GO:0016020//membrane;GO:0030288//outer membrane-bounded periplasmic space;GO:0031362//anchored component of external side of plasma membrane	GO:0004970//ionotropic glutamate receptor activity;GO:0015276//ligand-gated ion channel activity;GO:0033286//ectoine-transporting ATPase activity;GO:0033288//hydroxyectoine-transporting ATPase activity;GO:0033294//ectoine binding;GO:0033295//hydroxyectoine binding	GO:0033308//hydroxyectoine transport;GO:0051470//ectoine transport
State 1,2 -vs- State 1,3	SK1G00073852	2	2.16108035697519e-22	1.21389e-20	TET7	XP_015611839.1 tetraspanin-8 [Oryza sativa Japonica Group]	-	-	-	-	GO:0016021//integral component of membrane	-	-
State 1,2 -vs- State 1,3	SK1G00073880	1	4.51030393297743e-71	1.14461e-68	--	KAB8110578.1 hypothetical protein EE612_047894 [Oryza sativa]	-	-	-	-	GO:0005634//nucleus	GO:0003677//DNA binding;GO:0008270//zinc ion binding	-
State 1,2 -vs- State 1,3	SK1G00073891	5	2.10743674709176e-08	4.42236e-07	RUB1	XP_002460225.1 ubiquitin-NEDD8-like protein RUB1 [Sorghum bicolor]	-	-	-	-	-	GO:0005515//protein binding	GO:0006289//nucleotide-excision repair
State 1,2 -vs- State 1,3	SK1G00073912	4	7.38494057564363e-11	1.94842e-09	WRKY76	Q6IEK5.1 RecName: Full=WRKY transcription factor WRKY76; Short=OsWRKY76 [Oryza sativa Indica Group]	-	-	-	-	-	GO:0003677//DNA binding;GO:0003700//transcription factor activity, sequence-specific DNA binding;GO:0004803//transposase activity;GO:0043565//sequence-specific DNA binding	GO:0006313//transposition, DNA-mediated;GO:0006355//regulation of transcription, DNA-templated
State 1,2 -vs- State 1,3	SK1G00073960	4	1.45219791205068e-20	7.38131e-19	RSH3	XP_015611622.1 probable GTP diphosphokinase RSH3, chloroplastic [Oryza sativa Japonica Group]	Metabolism;Metabolism	Global and overview maps;Nucleotide metabolism	ko01100//Metabolic pathways;ko00230//Purine metabolism	K00951;K00951	-	GO:0003824//catalytic activity	GO:0015968//stringent response;GO:0015969//guanosine tetraphosphate metabolic process
State 1,2 -vs- State 1,3	SK1G00073971	2	3.34432388763034e-26	2.28626e-24	ALDH7B4	XP_015611835.1 aldehyde dehydrogenase family 7 member A1 [Oryza sativa Japonica Group]	Metabolism;Metabolism;Metabolism;Metabolism;Metabolism;Metabolism;Metabolism;Metabolism;Metabolism;Metabolism;Metabolism;Metabolism;Metabolism;Metabolism	Global and overview maps;Global and overview maps;Carbohydrate metabolism;Carbohydrate metabolism;Lipid metabolism;Amino acid metabolism;Amino acid metabolism;Amino acid metabolism;Carbohydrate metabolism;Lipid metabolism;Amino acid metabolism;Metabolism of other amino acids;Amino acid metabolism;Amino acid metabolism	ko01100//Metabolic pathways;ko01110//Biosynthesis of secondary metabolites;ko00010//Glycolysis / Gluconeogenesis;ko00620//Pyruvate metabolism;ko00561//Glycerolipid metabolism;ko00260//Glycine, serine and threonine metabolism;ko00380//Tryptophan metabolism;ko00330//Arginine and proline metabolism;ko00053//Ascorbate and aldarate metabolism;ko00071//Fatty acid degradation;ko00280//Valine, leucine an…	K14085;K14085;K14085;K14085;K14085;K14085;K14085;K14085;K14085;K14085;K14085;K14085;K14085;K14085	-	GO:0003842//1-pyrroline-5-carboxylate dehydrogenase activity;GO:0004350//glutamate-5-semialdehyde dehydrogenase activity;GO:0004491//methylmalonate-semialdehyde dehydrogenase (acylating) activity;GO:0004777//succinate-semialdehyde dehydrogenase (NAD+) activity;GO:0008802//betaine-aldehyde dehydrogenase activity;GO:0009013//succinate-semialdehyde dehydrogenase [NAD(P)+] activity;GO:0016491//oxidor…	GO:0006527//arginine catabolic process;GO:0006561//proline biosynthetic process;GO:0006562//proline catabolic process;GO:0006574//valine catabolic process;GO:0006578//amino-acid betaine biosynthetic process;GO:0009450//gamma-aminobutyric acid catabolic process;GO:0010124//phenylacetate catabolic process;GO:0055114//oxidation-reduction process
State 1,2 -vs- State 1,3	SK1G00073985	5	3.98485597289537e-11	1.07384e-09	EMB1187	XP_015651149.1 probable ethanolamine kinase [Oryza sativa Japonica Group]	Metabolism;Metabolism	Global and overview maps;Lipid metabolism	ko01100//Metabolic pathways;ko00564//Glycerophospholipid metabolism	K00894;K00894	-	GO:0019165//thiamine kinase activity	GO:0009228//thiamine biosynthetic process
State 1,2 -vs- State 1,3	SK1G00074013	1	6.40939777936528e-54	1.01386e-51	At1g07660	XP_016507811.1 PREDICTED: uncharacterized protein LOC107825453 [Nicotiana tabacum]	-	-	-	-	GO:0071821//FANCM-MHF complex	GO:0003677//DNA binding	GO:0006352//DNA-templated transcription, initiation
State 1,2 -vs- State 1,3	SK1G00074022	2	2.31737677020867e-16	9.10306e-15	PUP3	ONM55577.1 Purine permease 3 [Zea mays]	-	-	-	-	GO:0016020//membrane;GO:0016021//integral component of membrane	GO:0050097//methylaspartate mutase activity	GO:0019670//anaerobic glutamate catabolic process;GO:0055085//transmembrane transport
State 1,2 -vs- State 1,3	SK1G00074031	2	2.00928724915413e-32	1.74146e-30	PGI1	EEC84721.1 hypothetical protein OsI_31689 [Oryza sativa Indica Group]	Metabolism;Metabolism;Metabolism;Metabolism;Metabolism;Metabolism;Metabolism	Global and overview maps;Global and overview maps;Global and overview maps;Carbohydrate metabolism;Carbohydrate metabolism;Carbohydrate metabolism;Carbohydrate metabolism	ko01100//Metabolic pathways;ko01110//Biosynthesis of secondary metabolites;ko01200//Carbon metabolism;ko00500//Starch and sucrose metabolism;ko00010//Glycolysis / Gluconeogenesis;ko00520//Amino sugar and nucleotide sugar metabolism;ko00030//Pentose phosphate pathway	K01810;K01810;K01810;K01810;K01810;K01810;K01810	-	GO:0004347//glucose-6-phosphate isomerase activity	GO:0006094//gluconeogenesis;GO:0006096//glycolytic process
State 1,2 -vs- State 1,3	SK1G00074058	4	4.89492201736802e-09	1.097e-07	Zadh2	EEC84707.1 hypothetical protein OsI_31662 [Oryza sativa Indica Group]	-	-	-	-	-	GO:0003824//catalytic activity;GO:0004024//alcohol dehydrogenase activity, zinc-dependent;GO:0004316//3-oxoacyl-[acyl-carrier-protein] reductase (NADPH) activity;GO:0004757//sepiapterin reductase activity;GO:0004764//shikimate 3-dehydrogenase (NADP+) activity;GO:0008270//zinc ion binding;GO:0008667//2,3-dihydro-2,3-dihydroxybenzoate dehydrogenase activity;GO:0008678//2-deoxy-D-gluconate 3-dehydro…	GO:0000272//polysaccharide catabolic process;GO:0006113//fermentation;GO:0006567//threonine catabolic process;GO:0006633//fatty acid biosynthetic process;GO:0006729//tetrahydrobiopterin biosynthetic process;GO:0006813//potassium ion transport;GO:0008152//metabolic process;GO:0009404//toxin metabolic process;GO:0009423//chorismate biosynthetic process;GO:0010127//mycothiol-dependent detoxification…
State 1,2 -vs- State 1,3	SK1G00074074	2	4.97938447186518e-11	1.32966e-09	CYP707A7	A2Z212.1 RecName: Full=Abscisic acid 8'-hydroxylase 3; Short=ABA 8'-hydroxylase 3; AltName: Full=Cytochrome P450 707A7; AltName: Full=OsABA8ox3 [Oryza sativa Indica Group]	Metabolism	Metabolism of terpenoids and polyketides	ko00906//Carotenoid biosynthesis	K09843	-	GO:0005506//iron ion binding;GO:0016705//oxidoreductase activity, acting on paired donors, with incorporation or reduction of molecular oxygen;GO:0020037//heme binding	GO:0055114//oxidation-reduction process
State 1,2 -vs- State 1,3	SK1G00074076	2	2.72476390885385e-20	1.36723e-18	HSFB1	KAB8110836.1 hypothetical protein EE612_048278 [Oryza sativa]	-	-	-	-	-	GO:0003700//transcription factor activity, sequence-specific DNA binding;GO:0043565//sequence-specific DNA binding	GO:0006355//regulation of transcription, DNA-templated
State 1,2 -vs- State 1,3	SK1G00074096	4	3.40488484168623e-22	1.89444e-20	TPP2	EAZ09345.1 hypothetical protein OsI_31616 [Oryza sativa Indica Group]	Genetic Information Processing	Folding, sorting and degradation	ko03060//Protein export	K03100	GO:0030288//outer membrane-bounded periplasmic space	GO:0004252//serine-type endopeptidase activity	GO:0000746//conjugation;GO:0006465//signal peptide processing;GO:0009306//protein secretion;GO:0019430//removal of superoxide radicals
State 1,2 -vs- State 1,3	SK1G00074100	4	5.3557932292507e-37	5.26255e-35	B3GALT7	XP_015612661.1 beta-1,3-galactosyltransferase 7 [Oryza sativa Japonica Group]	-	-	-	-	GO:0016020//membrane	GO:0016757//transferase activity, transferring glycosyl groups;GO:0016758//transferase activity, transferring hexosyl groups	GO:0006486//protein glycosylation
State 1,2 -vs- State 1,3	SK1G00074109	2	5.85936586794223e-40	6.09702e-38	PDIL2-3	XP_015611801.1 protein disulfide isomerase-like 2-3 [Oryza sativa Japonica Group]	Genetic Information Processing	Folding, sorting and degradation	ko04141//Protein processing in endoplasmic reticulum	K09584	GO:0005737//cytoplasm;GO:0046540//U4/U6 x U5 tri-snRNP complex	GO:0003756//protein disulfide isomerase activity;GO:0015035//protein disulfide oxidoreductase activity;GO:0015036//disulfide oxidoreductase activity;GO:0016209//antioxidant activity;GO:0016491//oxidoreductase activity;GO:0016667//oxidoreductase activity, acting on a sulfur group of donors	GO:0000398//mRNA splicing, via spliceosome;GO:0006457//protein folding;GO:0006790//sulfur compound metabolic process;GO:0055114//oxidation-reduction process
State 1,2 -vs- State 1,3	SK1G00074129	4	2.3176797102289e-27	1.66171e-25	SAP1	XP_015651267.1 zinc finger A20 and AN1 domain-containing stress-associated protein 1 [Oryza sativa Japonica Group]	-	-	-	-	-	GO:0003677//DNA binding;GO:0008270//zinc ion binding	-
State 1,2 -vs- State 1,3	SK1G00074133	5	6.68828944506379e-56	1.11287e-53	RPL9	XP_015612091.1 60S ribosomal protein L9 [Oryza sativa Japonica Group]	Genetic Information Processing	Translation	ko03010//Ribosome	K02940	GO:0005840//ribosome;GO:0022625//cytosolic large ribosomal subunit	GO:0003735//structural constituent of ribosome;GO:0019843//rRNA binding	GO:0006412//translation
State 1,2 -vs- State 1,3	SK1G00074140	4	3.17223222430711e-10	7.92496e-09	At1g50590	XP_015651432.1 pirin-like protein [Oryza sativa Japonica Group]	-	-	-	-	-	GO:0003700//transcription factor activity, sequence-specific DNA binding	-
State 1,2 -vs- State 1,3	SK1G00074163	5	1.34538313849165e-09	3.18086e-08	HSP81-2	BAD04054.1 heat shock protein 90 [Oryza sativa Japonica Group]	Organismal Systems;Genetic Information Processing	Environmental adaptation;Folding, sorting and degradation	ko04626//Plant-pathogen interaction;ko04141//Protein processing in endoplasmic reticulum	K04079;K04079	-	GO:0005524//ATP binding;GO:0016887//ATPase activity;GO:0051082//unfolded protein binding	GO:0006457//protein folding
State 1,2 -vs- State 1,3	SK1G00074203	4	1.36847742240568e-19	6.67677e-18	MNB1A	EAZ09480.1 hypothetical protein OsI_31752 [Oryza sativa Indica Group]	-	-	-	-	-	GO:0003677//DNA binding	GO:0006355//regulation of transcription, DNA-templated
State 1,2 -vs- State 1,3	SK1G00074219	1	2.1814789368032e-220	2.56506e-217	CjBAp12	EAZ09461.1 hypothetical protein OsI_31732 [Oryza sativa Indica Group]	-	-	-	-	-	-	GO:0042742//defense response to bacterium;GO:0050832//defense response to fungus
State 1,2 -vs- State 1,3	SK1G00074220	1	8.48110462522908e-29	6.43378e-27	CjBAp12	XP_015611301.1 EG45-like domain containing protein [Oryza sativa Japonica Group]	-	-	-	-	-	-	GO:0042742//defense response to bacterium;GO:0050832//defense response to fungus
State 1,2 -vs- State 1,3	SK1G00074221	4	5.41561974301684e-26	3.6527e-24	ABCG11	OVA15689.1 ABC transporter-like [Macleaya cordata]	-	-	-	-	GO:0005575//cellular_component;GO:0005887//integral component of plasma membrane;GO:0009288//bacterial-type flagellum;GO:0009380//excinuclease repair complex;GO:0009898//cytoplasmic side of plasma membrane;GO:0016020//membrane;GO:0016021//integral component of membrane;GO:0043190//ATP-binding cassette (ABC) transporter complex;GO:0055051//ATP-binding cassette (ABC) transporter complex, integrated…	GO:0000309//nicotinamide-nucleotide adenylyltransferase activity;GO:0003674//molecular_function;GO:0003723//RNA binding;GO:0003724//RNA helicase activity;GO:0003824//catalytic activity;GO:0003924//GTPase activity;GO:0004020//adenylylsulfate kinase activity;GO:0004127//cytidylate kinase activity;GO:0004385//guanylate kinase activity;GO:0004527//exonuclease activity;GO:0005198//structural molecule …	GO:0000910//cytokinesis;GO:0001539//cilium or flagellum-dependent cell motility;GO:0006139//nucleobase-containing compound metabolic process;GO:0006260//DNA replication;GO:0006289//nucleotide-excision repair;GO:0006310//DNA recombination;GO:0006412//translation;GO:0006576//cellular biogenic amine metabolic process;GO:0006777//Mo-molybdopterin cofactor biosynthetic process;GO:0006790//sulfur compo…
State 1,2 -vs- State 1,3	SK1G00074228	2	1.53996425956642e-17	6.53697e-16	PER17	XP_015651263.1 peroxidase 17 [Oryza sativa Japonica Group]	Metabolism;Metabolism;Metabolism	Global and overview maps;Global and overview maps;Biosynthesis of other secondary metabolites	ko01100//Metabolic pathways;ko01110//Biosynthesis of secondary metabolites;ko00940//Phenylpropanoid biosynthesis	K00430;K00430;K00430	-	GO:0004601//peroxidase activity;GO:0020037//heme binding	GO:0006979//response to oxidative stress;GO:0055114//oxidation-reduction process
State 1,2 -vs- State 1,3	SK1G00074252	2	5.15817504567393e-09	1.15307e-07	PAT07	XP_015612480.1 probable protein S-acyltransferase 7 [Oryza sativa Japonica Group]	-	-	-	-	-	GO:0016409//palmitoyltransferase activity	-
State 1,2 -vs- State 1,3	SK1G00074268	4	5.36474359890407e-16	2.05697e-14	PAP27	XP_015651240.1 nucleotide pyrophosphatase/phosphodiesterase [Oryza sativa Japonica Group]	-	-	-	-	-	GO:0003993//acid phosphatase activity;GO:0016787//hydrolase activity;GO:0016788//hydrolase activity, acting on ester bonds;GO:0046872//metal ion binding	-
State 1,2 -vs- State 1,3	SK1G00074278	2	1.26238167218924e-11	3.52577e-10	--	XP_015611016.1 uncharacterized protein LOC9267854 [Oryza sativa Japonica Group]	-	-	-	-	GO:0000109//nucleotide-excision repair complex	GO:0008270//zinc ion binding;GO:0046872//metal ion binding	GO:0006289//nucleotide-excision repair
State 1,2 -vs- State 1,3	SK1G00074310	2	1.30400036707891e-35	1.24657e-33	--	XP_015612642.1 uncharacterized protein LOC4347474 [Oryza sativa Japonica Group]	-	-	-	-	-	-	-
State 1,2 -vs- State 1,3	SK1G00074324	2	2.52881365293069e-13	7.93629e-12	At3g20240	XP_015612278.1 probable mitochondrial adenine nucleotide transporter BTL1 isoform X2 [Oryza sativa Japonica Group]	-	-	-	-	-	-	-
State 1,2 -vs- State 1,3	SK1G00074337	4	2.94261359875772e-24	1.81788e-22	HMG3	XP_015612324.1 3-hydroxy-3-methylglutaryl-coenzyme A reductase 3-like [Oryza sativa Japonica Group]	Metabolism;Metabolism;Metabolism	Global and overview maps;Global and overview maps;Metabolism of terpenoids and polyketides	ko01100//Metabolic pathways;ko01110//Biosynthesis of secondary metabolites;ko00900//Terpenoid backbone biosynthesis	K00021;K00021;K00021	GO:0005576//extracellular region;GO:0042600//chorion	GO:0004420//hydroxymethylglutaryl-CoA reductase (NADPH) activity;GO:0005213//structural constituent of chorion	GO:0007304//chorion-containing eggshell formation;GO:0008299//isoprenoid biosynthetic process;GO:0015936//coenzyme A metabolic process;GO:0016054//organic acid catabolic process;GO:0055114//oxidation-reduction process
State 1,2 -vs- State 1,3	SK1G00074344	4	3.27971194866321e-13	1.02473e-11	PILS1	EEC84799.1 hypothetical protein OsI_31863 [Oryza sativa Indica Group]	-	-	-	-	GO:0016021//integral component of membrane	-	GO:0055085//transmembrane transport
State 1,2 -vs- State 1,3	SK1G00074358	4	4.09641056191245e-13	1.26866e-11	EIL3	EAZ09571.1 hypothetical protein OsI_31850 [Oryza sativa Indica Group]	Environmental Information Processing;Environmental Information Processing	Signal transduction;Signal transduction	ko04075//Plant hormone signal transduction;ko04016//MAPK signaling pathway - plant	K14514;K14514	GO:0005634//nucleus	-	-
State 1,2 -vs- State 1,3	SK1G00074407	2	1.42859772475491e-14	4.9309e-13	FAM214B	EEC67643.1 hypothetical protein OsI_35048 [Oryza sativa Indica Group]	-	-	-	-	-	-	-
State 1,2 -vs- State 1,3	SK1G00074419	4	6.0964636718981e-42	6.80547e-40	SGR	A2Z3E5.1 RecName: Full=Protein STAY-GREEN, chloroplastic; AltName: Full=Protein STAYGREEN; Flags: Precursor [Oryza sativa Indica Group]	Metabolism;Metabolism	Global and overview maps;Metabolism of cofactors and vitamins	ko01110//Biosynthesis of secondary metabolites;ko00860//Porphyrin and chlorophyll metabolism	K22013;K22013	-	-	-
State 1,2 -vs- State 1,3	SK1G00074434	4	4.16032462605264e-32	3.5794e-30	At4g27700	KAF0924380.1 hypothetical protein E2562_010055 [Oryza meyeriana var. granulata] [Oryza meyeriana]	-	-	-	-	GO:0005740//mitochondrial envelope	GO:0003824//catalytic activity;GO:0004129//cytochrome-c oxidase activity;GO:0018802//2,4-dihydroxyhept-2-ene-1,7-dioate aldolase activity	-
State 1,2 -vs- State 1,3	SK1G00074437	3	5.20466972401101e-09	1.16199e-07	--	KAF0924376.1 hypothetical protein E2562_010052 [Oryza meyeriana var. granulata] [Oryza meyeriana]	-	-	-	-	-	-	-
State 1,2 -vs- State 1,3	SK1G00074440	2	7.75487209820974e-10	1.86217e-08	GYP7	XP_015612460.1 GTPase-activating protein gyp7 [Oryza sativa Japonica Group]	-	-	-	-	-	-	-
State 1,2 -vs- State 1,3	SK1G00074449	3	4.80523737132153e-10	1.17548e-08	RABA3	XP_015610618.1 ras-related protein RABA3 [Oryza sativa Japonica Group]	Cellular Processes	Transport and catabolism	ko04144//Endocytosis	K07904	GO:0005737//cytoplasm	GO:0003924//GTPase activity;GO:0005525//GTP binding;GO:0043022//ribosome binding	GO:0042254//ribosome biogenesis
State 1,2 -vs- State 1,3	SK1G00074461	1	2.69283423992005e-15	9.89476e-14	PUX8	EEC84908.1 hypothetical protein OsI_32101 [Oryza sativa Indica Group]	-	-	-	-	GO:0030176//integral component of endoplasmic reticulum membrane	GO:0005515//protein binding	GO:0006886//intracellular protein transport
State 1,2 -vs- State 1,3	SK1G00038357	2	1.20626477239366e-08	2.59299e-07	PIK-2	XP_015612241.1 disease resistance protein Pik-2-like [Oryza sativa Japonica Group]	-	-	-	-	-	GO:0005515//protein binding;GO:0016787//hydrolase activity;GO:0043531//ADP binding	-
State 1,2 -vs- State 1,3	SK1G00074516	2	1.72621793899138e-25	1.12347e-23	GLX2-4	XP_015612445.1 probable hydroxyacylglutathione hydrolase 2, chloroplastic [Oryza sativa Japonica Group]	Metabolism;Metabolism	Global and overview maps;Carbohydrate metabolism	ko01100//Metabolic pathways;ko00620//Pyruvate metabolism	K01069;K01069	-	GO:0003824//catalytic activity;GO:0004416//hydroxyacylglutathione hydrolase activity	GO:0019243//methylglyoxal catabolic process to D-lactate via S-lactoyl-glutathione
State 1,2 -vs- State 1,3	SK1G00074536	3	5.76753469321979e-11	1.53316e-09	PTI13	XP_015611905.1 PTI1-like tyrosine-protein kinase 3 isoform X2 [Oryza sativa Japonica Group]	Organismal Systems	Environmental adaptation	ko04626//Plant-pathogen interaction	K13436	-	GO:0004672//protein kinase activity;GO:0005524//ATP binding	GO:0006468//protein phosphorylation
State 1,2 -vs- State 1,3	SK1G00074547	1	4.29272661594149e-37	4.24162e-35	APF1	EEC84974.1 hypothetical protein OsI_32231 [Oryza sativa Indica Group]	-	-	-	-	-	-	-
State 1,2 -vs- State 1,3	SK1G00074568	2	2.22056994035113e-18	1.00682e-16	DHQS	XP_015612522.1 3-dehydroquinate synthase, chloroplastic [Oryza sativa Japonica Group]	Metabolism;Metabolism;Metabolism;Metabolism	Global and overview maps;Global and overview maps;Global and overview maps;Amino acid metabolism	ko01100//Metabolic pathways;ko01110//Biosynthesis of secondary metabolites;ko01230//Biosynthesis of amino acids;ko00400//Phenylalanine, tyrosine and tryptophan biosynthesis	K01735;K01735;K01735;K01735	-	GO:0003856//3-dehydroquinate synthase activity;GO:0016491//oxidoreductase activity;GO:0016838//carbon-oxygen lyase activity, acting on phosphates;GO:0046872//metal ion binding	GO:0009423//chorismate biosynthetic process;GO:0046364//monosaccharide biosynthetic process;GO:0055114//oxidation-reduction process
State 1,2 -vs- State 1,3	SK1G00074569	5	2.66742719000076e-09	6.106e-08	--	BAD34387.1 unknown protein [Oryza sativa Japonica Group]	-	-	-	-	-	-	-
State 1,2 -vs- State 1,3	SK1G00074575	3	7.9672828261447e-10	1.91188e-08	MYB1	XP_015612022.1 myb-related protein Hv1-like [Oryza sativa Japonica Group]	-	-	-	-	GO:0005634//nucleus	GO:0003676//nucleic acid binding;GO:0005524//ATP binding;GO:0016818//hydrolase activity, acting on acid anhydrides, in phosphorus-containing anhydrides	GO:0006338//chromatin remodeling
State 1,2 -vs- State 1,3	SK1G00074583	1	1.53568038034786e-58	2.77801e-56	NFD4	XP_015612038.1 protein NUCLEAR FUSION DEFECTIVE 4 [Oryza sativa Japonica Group]	-	-	-	-	-	-	-
State 1,2 -vs- State 1,3	SK1G00074630	2	5.06303242392784e-14	1.67071e-12	TMN8	EEC85043.1 hypothetical protein OsI_32361 [Oryza sativa Indica Group]	-	-	-	-	GO:0016021//integral component of membrane	GO:0022857//transmembrane transporter activity	GO:0055085//transmembrane transport
State 1,2 -vs- State 1,3	SK1G00074633	4	1.90355157413801e-17	8.02244e-16	--	EEC85040.1 hypothetical protein OsI_32357 [Oryza sativa Indica Group]	-	-	-	-	GO:0005634//nucleus;GO:0005759//mitochondrial matrix	GO:0003677//DNA binding	-
State 1,2 -vs- State 1,3	SK1G00074642	2	1.20694246339899e-18	5.55808e-17	AAE11	EAZ10040.1 hypothetical protein OsI_32344 [Oryza sativa Indica Group]	-	-	-	-	-	GO:0003987//acetate-CoA ligase activity;GO:0004043//L-aminoadipate-semialdehyde dehydrogenase activity;GO:0008668//(2,3-dihydroxybenzoyl)adenylate synthase activity;GO:0008756//o-succinylbenzoate-CoA ligase activity;GO:0030729//acetoacetate-CoA ligase activity;GO:0047473//D-alanine-poly(phosphoribitol) ligase activity;GO:0050218//propionate-CoA ligase activity	GO:0009234//menaquinone biosynthetic process;GO:0019287//isopentenyl diphosphate biosynthetic process, mevalonate pathway;GO:0019290//siderophore biosynthetic process;GO:0019350//teichoic acid biosynthetic process;GO:0019427//acetyl-CoA biosynthetic process from acetate;GO:0019878//lysine biosynthetic process via aminoadipic acid
State 1,2 -vs- State 1,3	SK1G00074658	4	3.4104025646144e-08	6.98618e-07	Os09g0553600	EEC85025.1 hypothetical protein OsI_32326 [Oryza sativa Indica Group]	Metabolism;Metabolism	Global and overview maps;Metabolism of cofactors and vitamins	ko01100//Metabolic pathways;ko00760//Nicotinate and nicotinamide metabolism	K00767;K00767	-	GO:0004514//nicotinate-nucleotide diphosphorylase (carboxylating) activity;GO:0016763//transferase activity, transferring pentosyl groups	GO:0009435//NAD biosynthetic process;GO:0019363//pyridine nucleotide biosynthetic process
State 1,2 -vs- State 1,3	SK1G00074660	5	2.85495799740055e-19	1.37019e-17	At1g07660	XP_016507811.1 PREDICTED: uncharacterized protein LOC107825453 [Nicotiana tabacum]	-	-	-	-	GO:0071821//FANCM-MHF complex	GO:0003677//DNA binding	GO:0006352//DNA-templated transcription, initiation
State 1,2 -vs- State 1,3	SK1G00074663	2	9.61258705725078e-13	2.92062e-11	--	XP_015610995.1 glutelin type-D 1-like [Oryza sativa Japonica Group]	-	-	-	-	-	-	-
State 1,2 -vs- State 1,3	SK1G00074670	5	5.8810422379678e-26	3.9515e-24	HMGB2	XP_015651271.1 HMG1/2-like protein isoform X2 [Oryza sativa Japonica Group]	-	-	-	-	-	-	-
State 1,2 -vs- State 1,3	SK1G00074719	2	2.87863805359013e-25	1.85299e-23	Os09g0544000	XP_015651357.2 putrescine hydroxycinnamoyltransferase [Oryza sativa Japonica Group]	-	-	-	-	-	GO:0016747//transferase activity, transferring acyl groups other than amino-acyl groups	-
State 1,2 -vs- State 1,3	SK1G00074726	2	1.29924764048706e-35	1.24541e-33	--	XP_015651383.1 protein SRC2 [Oryza sativa Japonica Group]	-	-	-	-	-	-	-
State 1,2 -vs- State 1,3	SK1G00074747	5	3.52275258321989e-09	8.00677e-08	Ub-CEP52-1	XP_006649691.1 PREDICTED: ubiquitin-60S ribosomal protein L40-2 [Oryza brachyantha]	Genetic Information Processing	Translation	ko03010//Ribosome	K02927	GO:0005840//ribosome	GO:0003735//structural constituent of ribosome;GO:0005515//protein binding	GO:0006289//nucleotide-excision repair;GO:0006412//translation
State 1,2 -vs- State 1,3	SK1G00074752	2	7.69124594755282e-10	1.84815e-08	At5g03610	EEC85084.1 hypothetical protein OsI_32442 [Oryza sativa Indica Group]	-	-	-	-	-	GO:0016788//hydrolase activity, acting on ester bonds	-
State 1,2 -vs- State 1,3	SK1G00074770	4	2.69409488379227e-14	9.10289e-13	CP31A	XP_015611613.1 28 kDa ribonucleoprotein, chloroplastic [Oryza sativa Japonica Group]	-	-	-	-	-	GO:0000179//rRNA (adenine-N6,N6-)-dimethyltransferase activity;GO:0003676//nucleic acid binding	GO:0000154//rRNA modification;GO:0008380//RNA splicing
State 1,2 -vs- State 1,3	SK1G00074801	2	1.91407515766921e-20	9.67321e-19	UCC1	EEC85105.1 hypothetical protein OsI_32489 [Oryza sativa Indica Group]	-	-	-	-	-	GO:0009055//electron carrier activity	-
State 1,2 -vs- State 1,3	SK1G00043847	2	1.99738880440039e-13	6.31909e-12	ARPN	XP_015630444.1 chemocyanin [Oryza sativa Japonica Group]	-	-	-	-	-	GO:0003677//DNA binding;GO:0005507//copper ion binding;GO:0009055//electron carrier activity	-
State 1,2 -vs- State 1,3	SK1G00043875	4	7.30286336050011e-22	4.00635e-20	AGD9	EAY92635.1 hypothetical protein OsI_14379 [Oryza sativa Indica Group]	Cellular Processes	Transport and catabolism	ko04144//Endocytosis	K12493	-	GO:0005096//GTPase activator activity	-
State 1,2 -vs- State 1,3	SK1G00043881	2	3.48635204563581e-18	1.55672e-16	RCD1	XP_015630932.1 probable inactive poly [ADP-ribose] polymerase SRO1 [Oryza sativa Japonica Group]	-	-	-	-	-	GO:0003950//NAD+ ADP-ribosyltransferase activity	-
State 1,2 -vs- State 1,3	SK1G00043895	5	5.68054065930125e-23	3.29574e-21	SNF4	XP_015630980.1 sucrose nonfermenting 4-like protein [Oryza sativa Japonica Group]	-	-	-	-	GO:0005840//ribosome;GO:0022626//cytosolic ribosome	GO:0045182//translation regulator activity	GO:0009386//translational attenuation;GO:0044238//primary metabolic process
State 1,2 -vs- State 1,3	SK1G00043945	4	6.57547424411006e-31	5.48345e-29	RPL18	XP_015630413.1 50S ribosomal protein L18, chloroplastic [Oryza sativa Japonica Group]	Genetic Information Processing	Translation	ko03010//Ribosome	K02881	GO:0000315//organellar large ribosomal subunit;GO:0005840//ribosome;GO:0022625//cytosolic large ribosomal subunit	GO:0003735//structural constituent of ribosome	GO:0006412//translation
State 1,2 -vs- State 1,3	SK1G00043948	2	1.45111307437528e-10	3.72819e-09	ephA	EAY92418.1 hypothetical protein OsI_14152 [Oryza sativa Indica Group]	-	-	-	-	-	GO:0003674//molecular_function;GO:0003824//catalytic activity;GO:0047570//3-oxoadipate enol-lactonase activity;GO:0047746//chlorophyllase activity;GO:0070205//2-succinyl-6-hydroxy-2,4-cyclohexadiene-1-carboxylate synthase activity	GO:0009102//biotin biosynthetic process;GO:0009234//menaquinone biosynthetic process;GO:0015979//photosynthesis;GO:0015996//chlorophyll catabolic process;GO:0030163//protein catabolic process;GO:0042952//beta-ketoadipate pathway
State 1,2 -vs- State 1,3	SK1G00043950	2	2.43451822748853e-09	5.62763e-08	CNR10	EAY92435.1 hypothetical protein OsI_14168 [Oryza sativa Indica Group]	-	-	-	-	-	-	-
State 1,2 -vs- State 1,3	SK1G00043952	2	7.29778848612863e-104	3.34324e-101	CNR10	XP_015629327.1 cell number regulator 10 [Oryza sativa Japonica Group]	-	-	-	-	GO:0016021//integral component of membrane	GO:0004252//serine-type endopeptidase activity	-
State 1,2 -vs- State 1,3	SK1G00043977	3	3.17734462952844e-13	9.93624e-12	GSDA	XP_015628212.1 guanosine deaminase [Oryza sativa Japonica Group]	-	-	-	-	-	GO:0008251//tRNA-specific adenosine deaminase activity;GO:0008703//5-amino-6-(5-phosphoribosylamino)uracil reductase activity;GO:0008835//diaminohydroxyphosphoribosylaminopyrimidine deaminase activity;GO:0051539//4 iron, 4 sulfur cluster binding;GO:0070283//radical SAM enzyme activity	GO:0002100//tRNA wobble adenosine to inosine editing;GO:0009058//biosynthetic process;GO:0009231//riboflavin biosynthetic process
State 1,2 -vs- State 1,3	SK1G00043988	2	1.01361549094799e-46	1.34418e-44	GPA3	XP_015629757.1 serine/threonine-protein phosphatase BSL1 [Oryza sativa Japonica Group]	-	-	-	-	GO:0005634//nucleus	GO:0003677//DNA binding;GO:0005515//protein binding;GO:0009055//electron carrier activity;GO:0051536//iron-sulfur cluster binding	GO:0006310//DNA recombination;GO:0010124//phenylacetate catabolic process;GO:0016226//iron-sulfur cluster assembly
State 1,2 -vs- State 1,3	SK1G00044008	2	7.70638352935944e-49	1.11869e-46	AMT3-2	XP_015630045.1 ammonium transporter 3 member 2 [Oryza sativa Japonica Group]	-	-	-	-	GO:0016020//membrane	GO:0008519//ammonium transmembrane transporter activity	GO:0015696//ammonium transport
State 1,2 -vs- State 1,3	SK1G00044010	4	4.27027671319443e-10	1.05265e-08	Os01g0871200	BAS87279.1 Os03g0838800 [Oryza sativa Japonica Group]	-	-	-	-	-	-	-
State 1,2 -vs- State 1,3	SK1G00044022	2	9.5905385406157e-09	2.0806e-07	RBK1	XP_015632245.1 serine/threonine-protein kinase pakF [Oryza sativa Japonica Group]	-	-	-	-	-	GO:0004672//protein kinase activity;GO:0005524//ATP binding;GO:0016709//oxidoreductase activity, acting on paired donors, with incorporation or reduction of molecular oxygen, NAD(P)H as one donor, and incorporation of one atom of oxygen	GO:0006468//protein phosphorylation;GO:0006744//ubiquinone biosynthetic process
State 1,2 -vs- State 1,3	SK1G00044039	2	3.07667244126968e-24	1.89737e-22	RABA2A	XP_015629707.1 ras-related protein RABA2a [Oryza sativa Japonica Group]	Cellular Processes	Transport and catabolism	ko04144//Endocytosis	K07904	GO:0005737//cytoplasm	GO:0003677//DNA binding;GO:0003924//GTPase activity;GO:0005524//ATP binding;GO:0005525//GTP binding;GO:0016887//ATPase activity;GO:0017111//nucleoside-triphosphatase activity;GO:0019843//rRNA binding;GO:0043022//ribosome binding;GO:0051539//4 iron, 4 sulfur cluster binding	GO:0006400//tRNA modification;GO:0006576//cellular biogenic amine metabolic process;GO:0008150//biological_process;GO:0032508//DNA duplex unwinding;GO:0042254//ribosome biogenesis;GO:0046336//ethanolamine catabolic process;GO:0051186//cofactor metabolic process
State 1,2 -vs- State 1,3	SK1G00044042	5	1.88004385853088e-14	6.45122e-13	RPS6	KAB8094426.1 hypothetical protein EE612_021605 [Oryza sativa]	Genetic Information Processing	Translation	ko03010//Ribosome	K02990	GO:0000314//organellar small ribosomal subunit;GO:0005840//ribosome;GO:0022627//cytosolic small ribosomal subunit	GO:0003735//structural constituent of ribosome;GO:0019843//rRNA binding	GO:0006412//translation
State 1,2 -vs- State 1,3	SK1G00044076	1	2.37799430501252e-14	8.08908e-13	CDKF-3	XP_015632870.1 cyclin-dependent kinase F-3 isoform X1 [Oryza sativa Japonica Group]	-	-	-	-	-	GO:0004672//protein kinase activity;GO:0005524//ATP binding;GO:0016709//oxidoreductase activity, acting on paired donors, with incorporation or reduction of molecular oxygen, NAD(P)H as one donor, and incorporation of one atom of oxygen	GO:0006468//protein phosphorylation;GO:0006744//ubiquinone biosynthetic process
State 1,2 -vs- State 1,3	SK1G00044079	3	9.49178360812149e-14	3.07459e-12	PAP15	EEC76531.1 hypothetical protein OsI_14321 [Oryza sativa Indica Group]	-	-	-	-	-	GO:0003993//acid phosphatase activity;GO:0016787//hydrolase activity;GO:0046872//metal ion binding	-
State 1,2 -vs- State 1,3	SK1G00044082	3	3.75689540423512e-13	1.16865e-11	RIN4	XP_015628179.1 RPM1-interacting protein 4 [Oryza sativa Japonica Group]	Organismal Systems	Environmental adaptation	ko04626//Plant-pathogen interaction	K13456	-	-	-
State 1,2 -vs- State 1,3	SK1G00044095	5	4.57907809091634e-12	1.32182e-10	RPS2D	KAB8094099.1 hypothetical protein EE612_021160, partial [Oryza sativa]	Genetic Information Processing	Translation	ko03010//Ribosome	K02981	GO:0000312//plastid small ribosomal subunit;GO:0005840//ribosome;GO:0022627//cytosolic small ribosomal subunit	GO:0003723//RNA binding;GO:0003735//structural constituent of ribosome	GO:0006412//translation
State 1,2 -vs- State 1,3	SK1G00044147	5	1.42947467850886e-12	4.27328e-11	NAC002	AIQ84721.1 SNAC1 protein [Oryza sativa f. spontanea]	-	-	-	-	-	GO:0003677//DNA binding	GO:0006355//regulation of transcription, DNA-templated
State 1,2 -vs- State 1,3	SK1G00044148	2	1.14845593672469e-11	3.22546e-10	Os03g0815200	XP_015630556.1 probable methylenetetrahydrofolate reductase [Oryza sativa Japonica Group]	Metabolism;Metabolism;Metabolism	Global and overview maps;Global and overview maps;Metabolism of cofactors and vitamins	ko01100//Metabolic pathways;ko01200//Carbon metabolism;ko00670//One carbon pool by folate	K00297;K00297;K00297	-	GO:0004489//methylenetetrahydrofolate reductase (NAD(P)H) activity	GO:0006555//methionine metabolic process;GO:0009086//methionine biosynthetic process;GO:0009396//folic acid-containing compound biosynthetic process;GO:0055114//oxidation-reduction process
State 1,2 -vs- State 1,3	SK1G00044149	4	2.5375177559997e-84	8.60682e-82	RPL17	XP_015630559.1 50S ribosomal protein L17, chloroplastic [Oryza sativa Japonica Group]	Genetic Information Processing	Translation	ko03010//Ribosome	K02879	GO:0005762//mitochondrial large ribosomal subunit;GO:0005840//ribosome;GO:0022625//cytosolic large ribosomal subunit	GO:0003735//structural constituent of ribosome	GO:0006412//translation
State 1,2 -vs- State 1,3	SK1G00044160	5	5.17374957274735e-95	2.09775e-92	At5g01750	XP_015630153.2 protein LURP-one-related 15 [Oryza sativa Japonica Group]	-	-	-	-	-	-	-
State 1,2 -vs- State 1,3	SK1G00044166	2	7.0904264814403e-10	1.70727e-08	ANT1	EAY92345.1 hypothetical protein OsI_14071 [Oryza sativa Indica Group]	-	-	-	-	GO:0033281//TAT protein transport complex	-	GO:0043953//protein transport by the Tat complex
State 1,2 -vs- State 1,3	SK1G00044177	5	3.45445313655944e-45	4.32113e-43	RPS23	EAZ14059.1 hypothetical protein OsJ_03983 [Oryza sativa Japonica Group]	Genetic Information Processing	Translation	ko03010//Ribosome	K02973	GO:0000314//organellar small ribosomal subunit;GO:0005840//ribosome;GO:0022627//cytosolic small ribosomal subunit	GO:0003735//structural constituent of ribosome	GO:0006412//translation
State 1,2 -vs- State 1,3	SK1G00044211	2	4.15458402841974e-25	2.65976e-23	--	EEC76433.1 hypothetical protein OsI_14121 [Oryza sativa Indica Group]	-	-	-	-	GO:0005576//extracellular region	GO:0004867//serine-type endopeptidase inhibitor activity	-
State 1,2 -vs- State 1,3	SK1G00044214	2	6.4154029803819e-26	4.29418e-24	NAT6	XP_015632228.1 nucleobase-ascorbate transporter 6 [Oryza sativa Japonica Group]	-	-	-	-	GO:0005737//cytoplasm;GO:0016020//membrane;GO:0016021//integral component of membrane	GO:0003924//GTPase activity;GO:0005524//ATP binding;GO:0005525//GTP binding;GO:0015205//nucleobase transmembrane transporter activity;GO:0016887//ATPase activity;GO:0022857//transmembrane transporter activity;GO:0042907//xanthine transmembrane transporter activity;GO:0043022//ribosome binding;GO:0051539//4 iron, 4 sulfur cluster binding	GO:0006400//tRNA modification;GO:0008150//biological_process;GO:0015851//nucleobase transport;GO:0042254//ribosome biogenesis;GO:0042906//xanthine transport;GO:0051186//cofactor metabolic process;GO:0055085//transmembrane transport
State 1,2 -vs- State 1,3	SK1G00044243	2	2.07277083122432e-13	6.5517e-12	FLA18	XP_015632406.1 fasciclin-like arabinogalactan protein 16 [Oryza sativa Japonica Group]	-	-	-	-	-	-	-
State 1,2 -vs- State 1,3	SK1G00044258	3	1.65391054133501e-50	2.49323e-48	UBC2	XP_015631390.1 ubiquitin-conjugating enzyme E2 2 [Oryza sativa Japonica Group]	Genetic Information Processing	Folding, sorting and degradation	ko04120//Ubiquitin mediated proteolysis	K10573	-	GO:0005515//protein binding	-
State 1,2 -vs- State 1,3	SK1G00044265	3	9.00842495071379e-28	6.552e-26	At1g64760	XP_015630594.1 glucan endo-1,3-beta-glucosidase 8 [Oryza sativa Japonica Group]	-	-	-	-	-	GO:0004553//hydrolase activity, hydrolyzing O-glycosyl compounds	GO:0005975//carbohydrate metabolic process
State 1,2 -vs- State 1,3	SK1G00044272	2	3.94994617414412e-08	8.02155e-07	--	OEL36317.1 hypothetical protein BAE44_0002670 [Dichanthelium oligosanthes]	-	-	-	-	-	-	-
State 1,2 -vs- State 1,3	SK1G00044275	3	1.22511869718567e-37	1.22773e-35	GDH1	EAY92161.1 hypothetical protein OsI_13874 [Oryza sativa Indica Group]	Metabolism;Metabolism;Metabolism;Metabolism;Metabolism	Global and overview maps;Global and overview maps;Amino acid metabolism;Amino acid metabolism;Energy metabolism	ko01100//Metabolic pathways;ko01200//Carbon metabolism;ko00250//Alanine, aspartate and glutamate metabolism;ko00220//Arginine biosynthesis;ko00910//Nitrogen metabolism	K00261;K00261;K00261;K00261;K00261	-	GO:0016491//oxidoreductase activity;GO:0051287//NAD binding	GO:0006520//cellular amino acid metabolic process;GO:0055114//oxidation-reduction process
State 1,2 -vs- State 1,3	SK1G00044282	2	2.63558339911893e-47	3.58958e-45	LRX6	XP_015632362.1 leucine-rich repeat extensin-like protein 6 [Oryza sativa Japonica Group]	-	-	-	-	-	GO:0005515//protein binding	-
State 1,2 -vs- State 1,3	SK1G00044317	3	2.45316032007296e-42	2.79146e-40	--	XP_015630910.1 uncharacterized protein LOC4334442 [Oryza sativa Japonica Group]	-	-	-	-	-	-	-
State 1,2 -vs- State 1,3	SK1G00044338	5	2.64848239597408e-09	6.06657e-08	--	XP_015631044.1 uncharacterized protein LOC4334462 [Oryza sativa Japonica Group]	-	-	-	-	-	GO:0030674//protein binding, bridging;GO:0051015//actin filament binding	-
State 1,2 -vs- State 1,3	SK1G00044341	4	3.10828923614752e-19	1.48974e-17	--	-	-	-	-	-	-	-	-
State 1,2 -vs- State 1,3	SK1G00044343	1	1.09051932707501e-70	2.72823e-68	At3g28580	XP_015631967.1 AAA-ATPase At3g28580 [Oryza sativa Japonica Group]	-	-	-	-	GO:0000502//proteasome complex;GO:0009360//DNA polymerase III complex;GO:0009379//Holliday junction helicase complex;GO:0016021//integral component of membrane	GO:0003678//DNA helicase activity;GO:0003723//RNA binding;GO:0003724//RNA helicase activity;GO:0003887//DNA-directed DNA polymerase activity;GO:0004127//cytidylate kinase activity;GO:0004176//ATP-dependent peptidase activity;GO:0004222//metalloendopeptidase activity;GO:0004252//serine-type endopeptidase activity;GO:0004386//helicase activity;GO:0004798//thymidylate kinase activity;GO:0005198//str…	GO:0001887//selenium compound metabolic process;GO:0002949//tRNA threonylcarbamoyladenosine modification;GO:0006139//nucleobase-containing compound metabolic process;GO:0006260//DNA replication;GO:0006281//DNA repair;GO:0006310//DNA recombination;GO:0006400//tRNA modification;GO:0006508//proteolysis;GO:0006614//SRP-dependent cotranslational protein targeting to membrane;GO:0009236//cobalamin bios…
State 1,2 -vs- State 1,3	SK1G00044373	4	9.03194720068349e-27	6.35932e-25	--	XP_015632673.1 uncharacterized protein LOC4334503 isoform X1 [Oryza sativa Japonica Group]	-	-	-	-	-	GO:0003824//catalytic activity;GO:0005525//GTP binding	GO:0006777//Mo-molybdopterin cofactor biosynthetic process
State 1,2 -vs- State 1,3	SK1G00044388	3	3.15003033668782e-101	1.38897e-98	COR413PM2	XP_015630896.1 cold-regulated 413 plasma membrane protein 2 [Oryza sativa Japonica Group]	-	-	-	-	GO:0016021//integral component of membrane	-	-
State 1,2 -vs- State 1,3	SK1G00044392	4	3.05219913367756e-30	2.46941e-28	RPS9	XP_015628866.1 30S ribosomal protein S9, chloroplastic [Oryza sativa Japonica Group]	Genetic Information Processing	Translation	ko03010//Ribosome	K02996	GO:0005840//ribosome;GO:0022627//cytosolic small ribosomal subunit	GO:0003735//structural constituent of ribosome	GO:0006412//translation
State 1,2 -vs- State 1,3	SK1G00044419	3	1.86288170251691e-08	3.94437e-07	At2g16250	XP_015632529.1 probable LRR receptor-like serine/threonine-protein kinase At2g16250 [Oryza sativa Japonica Group]	-	-	-	-	-	GO:0004672//protein kinase activity;GO:0005515//protein binding;GO:0005524//ATP binding	GO:0006468//protein phosphorylation
State 1,2 -vs- State 1,3	SK1G00044441	4	4.32985599487753e-14	1.43684e-12	TIM14-3	BAS86642.1 Os03g0776900, partial [Oryza sativa Japonica Group]	-	-	-	-	-	GO:0005515//protein binding	GO:0006457//protein folding;GO:0009408//response to heat
State 1,2 -vs- State 1,3	SK1G00044442	2	7.85266156348849e-17	3.19864e-15	JUB1	EAY92034.1 hypothetical protein OsI_13727 [Oryza sativa Indica Group]	-	-	-	-	-	GO:0003677//DNA binding	GO:0006355//regulation of transcription, DNA-templated
State 1,2 -vs- State 1,3	SK1G00044447	4	5.34654134106461e-18	2.35749e-16	PSAF	AAC78106.1 photosystem-1 F subunit precursor [Oryza sativa Japonica Group]	Metabolism;Metabolism	Global and overview maps;Energy metabolism	ko01100//Metabolic pathways;ko00195//Photosynthesis	K02694;K02694	GO:0009522//photosystem I;GO:0009538//photosystem I reaction center	-	GO:0015979//photosynthesis
State 1,2 -vs- State 1,3	SK1G00044453	2	1.68016988539736e-19	8.16364e-18	ADF2	XP_015630947.1 actin-depolymerizing factor 2 [Oryza sativa Japonica Group]	-	-	-	-	-	GO:0003779//actin binding	-
State 1,2 -vs- State 1,3	SK1G00044473	5	4.69818062183976e-17	1.94061e-15	--	KAF2941671.1 hypothetical protein DAI22_03g363950 [Oryza sativa Japonica Group]	-	-	-	-	-	-	-
State 1,2 -vs- State 1,3	SK1G00044500	4	4.95424829590914e-09	1.10959e-07	--	XP_015632403.1 uncharacterized protein LOC4334358 isoform X2 [Oryza sativa Japonica Group]	-	-	-	-	-	-	-
State 1,2 -vs- State 1,3	SK1G00044502	1	8.51368839013209e-09	1.85957e-07	LDJ2	XP_015632121.1 dnaJ protein homolog [Oryza sativa Japonica Group]	Genetic Information Processing	Folding, sorting and degradation	ko04141//Protein processing in endoplasmic reticulum	K09503	-	GO:0005515//protein binding;GO:0016151//nickel cation binding;GO:0031072//heat shock protein binding;GO:0051082//unfolded protein binding	GO:0006457//protein folding;GO:0009408//response to heat;GO:0051604//protein maturation
State 1,2 -vs- State 1,3	SK1G00044527	2	1.0997805767026e-15	4.1359e-14	BACOVA_02659	XP_015631169.1 uncharacterized protein LOC4334114 [Oryza sativa Japonica Group]	Metabolism;Metabolism;Metabolism;Metabolism;Metabolism	Global and overview maps;Global and overview maps;Biosynthesis of other secondary metabolites;Carbohydrate metabolism;Metabolism of other amino acids	ko01100//Metabolic pathways;ko01110//Biosynthesis of secondary metabolites;ko00940//Phenylpropanoid biosynthesis;ko00500//Starch and sucrose metabolism;ko00460//Cyanoamino acid metabolism	K05349;K05349;K05349;K05349;K05349	-	GO:0004553//hydrolase activity, hydrolyzing O-glycosyl compounds	GO:0005975//carbohydrate metabolic process
State 1,2 -vs- State 1,3	SK1G00044558	4	5.10644933493461e-18	2.25727e-16	--	XP_015632120.1 uncharacterized protein LOC4334142 [Oryza sativa Japonica Group]	-	-	-	-	-	-	-
State 1,2 -vs- State 1,3	SK1G00044568	5	1.61292143708214e-19	7.85251e-18	RPL13AD	XP_015632279.1 60S ribosomal protein L13a-4 [Oryza sativa Japonica Group]	Genetic Information Processing	Translation	ko03010//Ribosome	K02872	GO:0000315//organellar large ribosomal subunit;GO:0005840//ribosome;GO:0022625//cytosolic large ribosomal subunit	GO:0003735//structural constituent of ribosome	GO:0006412//translation
State 1,2 -vs- State 1,3	SK1G00044579	5	2.18395468919455e-09	5.07838e-08	UGD3	XP_015631440.1 UDP-glucose 6-dehydrogenase 3 [Oryza sativa Japonica Group]	Metabolism;Metabolism;Metabolism;Metabolism	Global and overview maps;Carbohydrate metabolism;Carbohydrate metabolism;Carbohydrate metabolism	ko01100//Metabolic pathways;ko00520//Amino sugar and nucleotide sugar metabolism;ko00040//Pentose and glucuronate interconversions;ko00053//Ascorbate and aldarate metabolism	K00012;K00012;K00012;K00012	-	GO:0016491//oxidoreductase activity;GO:0016616//oxidoreductase activity, acting on the CH-OH group of donors, NAD or NADP as acceptor;GO:0050661//NADP binding;GO:0051287//NAD binding	GO:0055114//oxidation-reduction process
State 1,2 -vs- State 1,3	SK1G00044606	3	9.2594984757205e-13	2.82063e-11	P4H9	AAK63935.1 putative dioxygenase [Oryza sativa Japonica Group]	Metabolism;Metabolism	Global and overview maps;Amino acid metabolism	ko01100//Metabolic pathways;ko00330//Arginine and proline metabolism	K00472;K00472	-	GO:0016491//oxidoreductase activity	GO:0055114//oxidation-reduction process
State 1,2 -vs- State 1,3	SK1G00044609	5	1.37228595892285e-10	3.53597e-09	PER35	XP_015628252.1 peroxidase 51 [Oryza sativa Japonica Group]	Metabolism;Metabolism;Metabolism	Global and overview maps;Global and overview maps;Biosynthesis of other secondary metabolites	ko01100//Metabolic pathways;ko01110//Biosynthesis of secondary metabolites;ko00940//Phenylpropanoid biosynthesis	K00430;K00430;K00430	-	GO:0004601//peroxidase activity;GO:0020037//heme binding;GO:0042834//peptidoglycan binding	GO:0006979//response to oxidative stress;GO:0055114//oxidation-reduction process
State 1,2 -vs- State 1,3	SK1G00044611	2	8.26637902034318e-149	5.95095e-146	--	ABF99018.1 expressed protein [Oryza sativa Japonica Group]	-	-	-	-	-	-	-
State 1,2 -vs- State 1,3	SK1G00044620	4	3.17806595557019e-09	7.23266e-08	BHLH84	XP_015631804.1 transcription factor BHLH089-like isoform X1 [Oryza sativa Japonica Group]	-	-	-	-	-	GO:0046983//protein dimerization activity	-
State 1,2 -vs- State 1,3	SK1G00044621	4	1.49692047771586e-08	3.18864e-07	MAPKKK5	XP_015631802.1 mitogen-activated protein kinase kinase kinase 5 [Oryza sativa Japonica Group]	-	-	-	-	-	GO:0004672//protein kinase activity;GO:0005524//ATP binding	GO:0006468//protein phosphorylation
State 1,2 -vs- State 1,3	SK1G00044626	4	2.87363153631184e-25	1.85299e-23	HHO6	XP_015631206.1 transcription factor HHO5 [Oryza sativa Japonica Group]	-	-	-	-	-	-	-
State 1,2 -vs- State 1,3	SK1G00044634	5	1.30163709763783e-16	5.22358e-15	petM	XP_015630521.1 uncharacterized protein LOC4334225 [Oryza sativa Japonica Group]	-	-	-	-	GO:0009512//cytochrome b6f complex	-	-
State 1,2 -vs- State 1,3	SK1G00044657	2	2.16784969277851e-135	1.29612e-132	--	XP_015632320.1 uncharacterized protein LOC4334013 [Oryza sativa Japonica Group]	-	-	-	-	-	-	-
State 1,2 -vs- State 1,3	SK1G00044658	2	4.70369228704328e-12	1.35669e-10	--	EEC76130.1 hypothetical protein OsI_13413 [Oryza sativa Indica Group]	-	-	-	-	-	GO:0005215//transporter activity	GO:0006810//transport
State 1,2 -vs- State 1,3	SK1G00044659	2	1.77449681894215e-21	9.55655e-20	--	XP_015632318.1 proteinase inhibitor PSI-1.2 [Oryza sativa Japonica Group]	-	-	-	-	-	GO:0004867//serine-type endopeptidase inhibitor activity	-
State 1,2 -vs- State 1,3	SK1G00044683	4	2.84286202770071e-10	7.12736e-09	--	EEC76143.1 hypothetical protein OsI_13433 [Oryza sativa Indica Group]	-	-	-	-	-	GO:0016787//hydrolase activity;GO:0016791//phosphatase activity	GO:0008152//metabolic process
State 1,2 -vs- State 1,3	SK1G00044692	5	8.71025199658756e-17	3.5276e-15	LOX1.1	EAY91797.1 hypothetical protein OsI_13441 [Oryza sativa Indica Group]	Metabolism	Lipid metabolism	ko00591//Linoleic acid metabolism	K15718	-	GO:0005515//protein binding;GO:0016702//oxidoreductase activity, acting on single donors with incorporation of molecular oxygen, incorporation of two atoms of oxygen;GO:0046872//metal ion binding	GO:0055114//oxidation-reduction process
State 1,2 -vs- State 1,3	SK1G00044717	4	2.66484050129734e-14	9.01268e-13	Os03g0743400	XP_004981815.1 probable histone H2A variant 3 [Setaria italica]	-	-	-	-	-	GO:0003677//DNA binding	-
State 1,2 -vs- State 1,3	SK1G00044724	5	6.91547525037783e-10	1.66856e-08	TSJT1	AAP12992.1 unknown protein [Oryza sativa Japonica Group]	-	-	-	-	-	GO:0004066//asparagine synthase (glutamine-hydrolyzing) activity;GO:0004360//glutamine-fructose-6-phosphate transaminase (isomerizing) activity	GO:0006040//amino sugar metabolic process;GO:0006529//asparagine biosynthetic process;GO:0009252//peptidoglycan biosynthetic process
State 1,2 -vs- State 1,3	SK1G00044787	1	2.12576239226169e-73	5.63807e-71	At4g34480	XP_015632169.1 glucan endo-1,3-beta-glucosidase 7 [Oryza sativa Japonica Group]	-	-	-	-	-	GO:0004553//hydrolase activity, hydrolyzing O-glycosyl compounds;GO:0004655//porphobilinogen synthase activity;GO:0046872//metal ion binding	GO:0005975//carbohydrate metabolic process;GO:0033014//tetrapyrrole biosynthetic process
State 1,2 -vs- State 1,3	SK1G00044798	2	3.14979384763634e-18	1.4136e-16	PDR17	XP_015628270.1 phosphatidylinositol transfer protein PDR17 [Oryza sativa Japonica Group]	-	-	-	-	-	GO:0003677//DNA binding;GO:0003700//transcription factor activity, sequence-specific DNA binding;GO:0016987//sigma factor activity	GO:0006352//DNA-templated transcription, initiation;GO:0006355//regulation of transcription, DNA-templated
State 1,2 -vs- State 1,3	SK1G00044811	1	1.28341131525357e-87	4.52723e-85	BHLH25	EAY91717.1 hypothetical protein OsI_13359 [Oryza sativa Indica Group]	-	-	-	-	-	GO:0046983//protein dimerization activity	-
State 1,2 -vs- State 1,3	SK1G00044813	4	1.02911333148507e-54	1.6729e-52	TUBA1	XP_015630335.1 tubulin alpha-1 chain [Oryza sativa Japonica Group]	Cellular Processes	Transport and catabolism	ko04145//Phagosome	K07374	-	GO:0003924//GTPase activity	-
State 1,2 -vs- State 1,3	SK1G00044825	2	1.85793420424516e-42	2.12788e-40	ACC1	AAA33888.1 1-aminocyclopropane-1-carboxylate synthase [Oryza sativa Indica Group]	Metabolism;Metabolism;Metabolism	Global and overview maps;Global and overview maps;Amino acid metabolism	ko01100//Metabolic pathways;ko01110//Biosynthesis of secondary metabolites;ko00270//Cysteine and methionine metabolism	K01762;K01762;K01762	GO:0005737//cytoplasm	GO:0003824//catalytic activity;GO:0004400//histidinol-phosphate transaminase activity;GO:0004838//L-tyrosine:2-oxoglutarate aminotransferase activity;GO:0009016//succinyldiaminopimelate transaminase activity;GO:0016835//carbon-oxygen lyase activity;GO:0030170//pyridoxal phosphate binding;GO:0047688//aspartate 4-decarboxylase activity;GO:0048472//threonine-phosphate decarboxylase activity	GO:0000105//histidine biosynthetic process;GO:0006531//aspartate metabolic process;GO:0006559//L-phenylalanine catabolic process;GO:0006572//tyrosine catabolic process;GO:0008652//cellular amino acid biosynthetic process;GO:0009058//biosynthetic process;GO:0009236//cobalamin biosynthetic process;GO:0019877//diaminopimelate biosynthetic process;GO:0042398//cellular modified amino acid biosynthetic…
State 1,2 -vs- State 1,3	SK1G00044863	2	1.83549329184587e-32	1.59475e-30	ISPH	EEC76125.1 hypothetical protein OsI_13396 [Oryza sativa Indica Group]	Metabolism;Metabolism;Metabolism	Global and overview maps;Global and overview maps;Metabolism of terpenoids and polyketides	ko01100//Metabolic pathways;ko01110//Biosynthesis of secondary metabolites;ko00900//Terpenoid backbone biosynthesis	K03527;K03527;K03527	-	GO:0046872//metal ion binding;GO:0051745//4-hydroxy-3-methylbut-2-en-1-yl diphosphate reductase activity	GO:0009240//isopentenyl diphosphate biosynthetic process;GO:0015968//stringent response;GO:0019288//isopentenyl diphosphate biosynthetic process, methylerythritol 4-phosphate pathway;GO:0046677//response to antibiotic;GO:0050992//dimethylallyl diphosphate biosynthetic process
State 1,2 -vs- State 1,3	SK1G00044865	4	3.83200782760487e-71	9.79522e-69	Os03g0700700	EAY91532.1 hypothetical protein OsI_13165 [Oryza sativa Indica Group]	Metabolism	Lipid metabolism	ko00591//Linoleic acid metabolism	K15718	-	GO:0005515//protein binding;GO:0016702//oxidoreductase activity, acting on single donors with incorporation of molecular oxygen, incorporation of two atoms of oxygen;GO:0046872//metal ion binding	GO:0055114//oxidation-reduction process
State 1,2 -vs- State 1,3	SK1G00044888	4	7.79711726472747e-23	4.49417e-21	RPS13	EEC76030.1 hypothetical protein OsI_13197 [Oryza sativa Indica Group]	Genetic Information Processing	Translation	ko03010//Ribosome	K02952	GO:0005840//ribosome;GO:0016021//integral component of membrane;GO:0022627//cytosolic small ribosomal subunit	GO:0003723//RNA binding;GO:0003735//structural constituent of ribosome	GO:0006412//translation
State 1,2 -vs- State 1,3	SK1G00044922	4	1.04572630317117e-12	3.16635e-11	--	XP_015628768.1 chemocyanin [Oryza sativa Japonica Group]	-	-	-	-	GO:0016020//membrane	GO:0005507//copper ion binding;GO:0009055//electron carrier activity	-
State 1,2 -vs- State 1,3	SK1G00044929	4	9.30045888430913e-23	5.31724e-21	At4g39670	AAX95657.1 hypothetical protein [Oryza sativa Japonica Group]	-	-	-	-	GO:0005737//cytoplasm	-	-
State 1,2 -vs- State 1,3	SK1G00044930	1	1.09151231409705e-231	1.42604e-228	GF14F	XP_015631133.1 14-3-3-like protein GF14-F isoform X2 [Oryza sativa Japonica Group]	-	-	-	-	-	-	-
State 1,2 -vs- State 1,3	SK1G00044946	1	6.04331099748724e-11	1.60525e-09	RKL1	XP_015633017.1 probable inactive receptor kinase RLK902 [Oryza sativa Japonica Group]	-	-	-	-	-	GO:0004672//protein kinase activity;GO:0005515//protein binding;GO:0005524//ATP binding	GO:0006468//protein phosphorylation
State 1,2 -vs- State 1,3	SK1G00044978	4	3.36245809513457e-20	1.68242e-18	At3g17800	XP_015630315.1 UV-B-induced protein At3g17800, chloroplastic [Oryza sativa Japonica Group]	-	-	-	-	-	-	-
State 1,2 -vs- State 1,3	SK1G00045034	2	2.56992768904342e-61	5.12171e-59	HIPL1	XP_015632377.1 HIPL1 protein [Oryza sativa Japonica Group]	-	-	-	-	-	-	-
State 1,2 -vs- State 1,3	SK1G00045075	3	3.06840485697863e-11	8.33883e-10	At3g11230	XP_015632926.1 protein yippee-like [Oryza sativa Japonica Group]	-	-	-	-	-	-	-
State 1,2 -vs- State 1,3	SK1G00045078	1	6.80653614076744e-22	3.74572e-20	ACER	XP_015632788.1 alkaline ceramidase [Oryza sativa Japonica Group]	Metabolism;Metabolism	Global and overview maps;Lipid metabolism	ko01100//Metabolic pathways;ko00600//Sphingolipid metabolism	K04711;K04711	GO:0016021//integral component of membrane	GO:0016811//hydrolase activity, acting on carbon-nitrogen (but not peptide) bonds, in linear amides	GO:0006672//ceramide metabolic process
State 1,2 -vs- State 1,3	SK1G00045086	2	3.4254049203055e-13	1.06741e-11	--	ABF98383.1 expressed protein [Oryza sativa Japonica Group]	-	-	-	-	-	-	-
State 1,2 -vs- State 1,3	SK1G00045125	2	6.69520172102286e-12	1.90616e-10	RGBB	B8AP31.1 RecName: Full=Guanine nucleotide-binding protein subunit beta; AltName: Full=WD40 repeat-containing protein 80; Short=OsWD40-80 [Oryza sativa Indica Group]	-	-	-	-	-	GO:0005515//protein binding	-
State 1,2 -vs- State 1,3	SK1G00045135	5	8.00865777477181e-21	4.11216e-19	RBG7	EEC75898.1 hypothetical protein OsI_12955 [Oryza sativa Indica Group]	-	-	-	-	-	GO:0003676//nucleic acid binding	GO:0008380//RNA splicing
State 1,2 -vs- State 1,3	SK1G00045149	2	4.17007424319278e-53	6.50882e-51	--	BAH92308.1 Os03g0673100 [Oryza sativa Japonica Group]	-	-	-	-	-	-	-
State 1,2 -vs- State 1,3	SK1G00045168	4	9.14383841171044e-17	3.69472e-15	--	EAY91376.1 hypothetical protein OsI_12996 [Oryza sativa Indica Group]	-	-	-	-	-	-	-
State 1,2 -vs- State 1,3	SK1G00045179	5	2.73964674310047e-16	1.06904e-14	--	-	-	-	-	-	-	-	-
State 1,2 -vs- State 1,3	SK1G00045187	2	1.39354866139811e-15	5.20184e-14	BLH7	AAS18416.1 benzothiadiazole-induced homeodomain protein 1 [Oryza sativa Indica Group]	-	-	-	-	-	GO:0003677//DNA binding	GO:0006355//regulation of transcription, DNA-templated
State 1,2 -vs- State 1,3	SK1G00045206	1	5.74969201203282e-19	2.7115e-17	CYP92C6	AAX95529.1 Putative cytochrome P450 [Oryza sativa Japonica Group]	Metabolism	Metabolism of terpenoids and polyketides	ko00904//Diterpenoid biosynthesis	K22639	-	GO:0005506//iron ion binding;GO:0016705//oxidoreductase activity, acting on paired donors, with incorporation or reduction of molecular oxygen;GO:0020037//heme binding	GO:0055114//oxidation-reduction process
State 1,2 -vs- State 1,3	SK1G00045213	4	4.36859213664258e-11	1.17277e-09	GATC	XP_015628845.1 glutamyl-tRNA(Gln) amidotransferase subunit C, chloroplastic/mitochondrial [Oryza sativa Japonica Group]	Metabolism;Genetic Information Processing	Global and overview maps;Translation	ko01100//Metabolic pathways;ko00970//Aminoacyl-tRNA biosynthesis	K02435;K02435	GO:0030956//glutamyl-tRNA(Gln) amidotransferase complex	GO:0050567//glutaminyl-tRNA synthase (glutamine-hydrolyzing) activity	GO:0006424//glutamyl-tRNA aminoacylation;GO:0006450//regulation of translational fidelity
State 1,2 -vs- State 1,3	SK1G00045243	1	5.96730742353912e-75	1.64451e-72	--	ABR25707.1 dehydrin 13, partial [Oryza sativa Indica Group]	-	-	-	-	-	-	-
State 1,2 -vs- State 1,3	SK1G00045251	2	5.36206134191464e-24	3.26115e-22	At1g64760	XP_015631362.1 glucan endo-1,3-beta-glucosidase 8 [Oryza sativa Japonica Group]	-	-	-	-	-	GO:0004553//hydrolase activity, hydrolyzing O-glycosyl compounds	GO:0005975//carbohydrate metabolic process
State 1,2 -vs- State 1,3	SK1G00045285	2	2.47071848199561e-14	8.38832e-13	Zlp	OEL24610.1 Zeamatin [Dichanthelium oligosanthes]	-	-	-	-	-	GO:0008233//peptidase activity	GO:0006508//proteolysis;GO:0016032//viral process
State 1,2 -vs- State 1,3	SK1G00045308	5	1.33466209556575e-25	8.78362e-24	IAA12	XP_015628435.1 auxin-responsive protein IAA12 [Oryza sativa Japonica Group]	Environmental Information Processing	Signal transduction	ko04075//Plant hormone signal transduction	K14484	-	GO:0005515//protein binding	-
State 1,2 -vs- State 1,3	SK1G00045408	2	2.84234351903079e-11	7.75434e-10	Os03g0617900	EEC75742.1 hypothetical protein OsI_12624 [Oryza sativa Indica Group]	Metabolism;Metabolism;Metabolism;Metabolism;Metabolism	Global and overview maps;Global and overview maps;Global and overview maps;Global and overview maps;Amino acid metabolism	ko01100//Metabolic pathways;ko01110//Biosynthesis of secondary metabolites;ko01230//Biosynthesis of amino acids;ko01210//2-Oxocarboxylic acid metabolism;ko00220//Arginine biosynthesis	K00145;K00145;K00145;K00145;K00145	-	GO:0003824//catalytic activity;GO:0003942//N-acetyl-gamma-glutamyl-phosphate reductase activity;GO:0004073//aspartate-semialdehyde dehydrogenase activity;GO:0008839//4-hydroxy-tetrahydrodipicolinate reductase;GO:0016491//oxidoreductase activity;GO:0016620//oxidoreductase activity, acting on the aldehyde or oxo group of donors, NAD or NADP as acceptor;GO:0046983//protein dimerization activity;GO:0…	GO:0006592//ornithine biosynthetic process;GO:0006813//potassium ion transport;GO:0008652//cellular amino acid biosynthetic process;GO:0009086//methionine biosynthetic process;GO:0009088//threonine biosynthetic process;GO:0009089//lysine biosynthetic process via diaminopimelate;GO:0009097//isoleucine biosynthetic process;GO:0055114//oxidation-reduction process
State 1,2 -vs- State 1,3	SK1G00045531	1	4.45377580300257e-21	2.32063e-19	SAPK10	XP_015628310.1 serine/threonine-protein kinase SAPK10 isoform X2 [Oryza sativa Japonica Group]	Environmental Information Processing;Environmental Information Processing	Signal transduction;Signal transduction	ko04075//Plant hormone signal transduction;ko04016//MAPK signaling pathway - plant	K14498;K14498	-	GO:0004672//protein kinase activity;GO:0005524//ATP binding	GO:0006468//protein phosphorylation
State 1,2 -vs- State 1,3	SK1G00045545	4	4.02714964298743e-20	2.0093e-18	--	EAZ27632.1 hypothetical protein OsJ_11576 [Oryza sativa Japonica Group]	-	-	-	-	-	-	-
State 1,2 -vs- State 1,3	SK1G00045620	4	8.97534869224818e-226	1.09174e-222	UAM1	XP_015631326.1 UDP-arabinopyranose mutase 1 [Oryza sativa Japonica Group]	Metabolism;Metabolism	Global and overview maps;Carbohydrate metabolism	ko01100//Metabolic pathways;ko00520//Amino sugar and nucleotide sugar metabolism	K13379;K13379	-	-	-
State 1,2 -vs- State 1,3	SK1G00045633	3	6.28341077953081e-29	4.80797e-27	--	XP_020152323.1 uncharacterized protein LOC109737606 [Aegilops tauschii subsp. tauschii] [Aegilops tauschii]	-	-	-	-	-	-	-
State 1,2 -vs- State 1,3	SK1G00045659	5	3.46675014141822e-65	7.78915e-63	RPL13B	XP_015632652.1 60S ribosomal protein L13-2 [Oryza sativa Japonica Group]	Genetic Information Processing	Translation	ko03010//Ribosome	K02873	GO:0005840//ribosome	GO:0003735//structural constituent of ribosome;GO:0016655//oxidoreductase activity, acting on NAD(P)H, quinone or similar compound as acceptor	GO:0006412//translation;GO:0006814//sodium ion transport;GO:0055114//oxidation-reduction process
State 1,2 -vs- State 1,3	SK1G00045713	1	0	0	--	-	-	-	-	-	GO:0005789//endoplasmic reticulum membrane	-	GO:0034599//cellular response to oxidative stress
State 1,2 -vs- State 1,3	SK1G00045768	1	1.49095960516864e-08	3.17786e-07	CYP71Z16	BAF08463.1 Os02g0278400 [Oryza sativa Japonica Group]	-	-	-	-	-	GO:0005506//iron ion binding;GO:0016705//oxidoreductase activity, acting on paired donors, with incorporation or reduction of molecular oxygen;GO:0020037//heme binding	GO:0055114//oxidation-reduction process
State 1,2 -vs- State 1,3	SK1G00045778	4	1.21600054987434e-57	2.14472e-55	rps5	EAY90626.1 hypothetical protein OsI_12226 [Oryza sativa Indica Group]	Genetic Information Processing	Translation	ko03010//Ribosome	K02988	GO:0000312//plastid small ribosomal subunit;GO:0005840//ribosome;GO:0022627//cytosolic small ribosomal subunit	GO:0003723//RNA binding;GO:0003735//structural constituent of ribosome	GO:0006412//translation
State 1,2 -vs- State 1,3	SK1G00045815	4	1.40870393181076e-25	9.25364e-24	AOC	XP_015632351.1 allene oxide cyclase, chloroplastic [Oryza sativa Japonica Group]	Metabolism;Metabolism;Metabolism	Global and overview maps;Global and overview maps;Lipid metabolism	ko01100//Metabolic pathways;ko01110//Biosynthesis of secondary metabolites;ko00592//alpha-Linolenic acid metabolism	K10525;K10525;K10525	-	GO:0016853//isomerase activity	-
State 1,2 -vs- State 1,3	SK1G00045820	4	4.79761419884224e-31	4.01033e-29	--	XP_015629216.1 uncharacterized protein LOC4333206 [Oryza sativa Japonica Group]	-	-	-	-	-	-	-
State 1,2 -vs- State 1,3	SK1G00045828	2	2.60407680517035e-12	7.61011e-11	LRR1	XP_015631230.1 leucine-rich repeat protein 1-like [Oryza sativa Japonica Group]	-	-	-	-	-	GO:0005515//protein binding	-
State 1,2 -vs- State 1,3	SK1G00045903	4	1.05179316153515e-20	5.36932e-19	Os03g0429000	XP_015628386.1 cysteine proteinase inhibitor 8 [Oryza sativa Japonica Group]	-	-	-	-	-	GO:0004869//cysteine-type endopeptidase inhibitor activity	-
State 1,2 -vs- State 1,3	SK1G00045948	3	5.25411824869934e-32	4.48763e-30	Os03g0405500	XP_015630417.1 probable nucleoredoxin 1-1 isoform X3 [Oryza sativa Japonica Group]	-	-	-	-	GO:0005737//cytoplasm	GO:0003756//protein disulfide isomerase activity;GO:0015035//protein disulfide oxidoreductase activity;GO:0015036//disulfide oxidoreductase activity;GO:0016209//antioxidant activity;GO:0016491//oxidoreductase activity;GO:0043758//acetate-CoA ligase (ADP-forming) activity;GO:0051539//4 iron, 4 sulfur cluster binding	GO:0006457//protein folding;GO:0055114//oxidation-reduction process
State 1,2 -vs- State 1,3	SK1G00045951	3	2.98639042921346e-21	1.57231e-19	Os03g0405900	AAU89249.1 C1-like domain containing protein [Oryza sativa Japonica Group]	-	-	-	-	GO:0005737//cytoplasm	GO:0003756//protein disulfide isomerase activity;GO:0015035//protein disulfide oxidoreductase activity;GO:0015036//disulfide oxidoreductase activity;GO:0016209//antioxidant activity;GO:0016491//oxidoreductase activity;GO:0043758//acetate-CoA ligase (ADP-forming) activity;GO:0051539//4 iron, 4 sulfur cluster binding	GO:0006457//protein folding;GO:0055114//oxidation-reduction process
State 1,2 -vs- State 1,3	SK1G00045956	5	1.06570545937742e-17	4.5789e-16	Cacna2d3	XP_015631194.1 uncharacterized protein LOC4333081 isoform X1 [Oryza sativa Japonica Group]	-	-	-	-	-	-	-
State 1,2 -vs- State 1,3	SK1G00046004	2	9.10214946240651e-11	2.38365e-09	At5g67130	XP_015628557.1 PI-PLC X domain-containing protein At5g67130 isoform X3 [Oryza sativa Japonica Group]	-	-	-	-	-	-	-
State 1,2 -vs- State 1,3	SK1G00046037	2	9.77076698125218e-11	2.55307e-09	ATL3	KAB8092110.1 hypothetical protein EE612_017911 [Oryza sativa]	-	-	-	-	GO:0000109//nucleotide-excision repair complex;GO:0005680//anaphase-promoting complex	GO:0008270//zinc ion binding;GO:0046872//metal ion binding;GO:0061630//ubiquitin protein ligase activity;GO:0097602//cullin family protein binding	GO:0006289//nucleotide-excision repair;GO:0031145//anaphase-promoting complex-dependent proteasomal ubiquitin-dependent protein catabolic process
State 1,2 -vs- State 1,3	SK1G00046079	4	8.08271695785013e-18	3.5113e-16	RLK902	XP_006651449.1 PREDICTED: probable inactive receptor kinase At4g23740 [Oryza brachyantha]	-	-	-	-	-	GO:0004672//protein kinase activity;GO:0005524//ATP binding	GO:0006468//protein phosphorylation
State 1,2 -vs- State 1,3	SK1G00046089	2	3.80266559545539e-17	1.57997e-15	TPP9	XP_015628649.1 probable trehalose-phosphate phosphatase 9 [Oryza sativa Japonica Group]	Metabolism;Metabolism;Metabolism	Global and overview maps;Global and overview maps;Carbohydrate metabolism	ko01100//Metabolic pathways;ko01110//Biosynthesis of secondary metabolites;ko00500//Starch and sucrose metabolism	K01087;K01087;K01087	-	GO:0003824//catalytic activity;GO:0004805//trehalose-phosphatase activity;GO:0016787//hydrolase activity	GO:0005992//trehalose biosynthetic process;GO:0008152//metabolic process
State 1,2 -vs- State 1,3	SK1G00046115	2	1.910326824575e-64	4.13416e-62	DAHPS1	KAB8092054.1 hypothetical protein EE612_017811 [Oryza sativa]	Metabolism;Metabolism;Metabolism;Metabolism	Global and overview maps;Global and overview maps;Global and overview maps;Amino acid metabolism	ko01100//Metabolic pathways;ko01110//Biosynthesis of secondary metabolites;ko01230//Biosynthesis of amino acids;ko00400//Phenylalanine, tyrosine and tryptophan biosynthesis	K01626;K01626;K01626;K01626	-	GO:0003849//3-deoxy-7-phosphoheptulonate synthase activity	GO:0009073//aromatic amino acid family biosynthetic process;GO:0009423//chorismate biosynthetic process
State 1,2 -vs- State 1,3	SK1G00046119	4	1.78195206980993e-23	1.05644e-21	HTR4	RDX80863.1 hypothetical protein CR513_38538, partial [Mucuna pruriens]	-	-	-	-	GO:0071821//FANCM-MHF complex	GO:0003677//DNA binding	GO:0006352//DNA-templated transcription, initiation
State 1,2 -vs- State 1,3	SK1G00046140	4	1.0966486485275e-08	2.36456e-07	SCPL51	AAP04191.1 putative serine carboxypeptidase [Oryza sativa Japonica Group]	-	-	-	-	-	GO:0003991//acetylglutamate kinase activity;GO:0004185//serine-type carboxypeptidase activity	GO:0006508//proteolysis;GO:0006592//ornithine biosynthetic process
State 1,2 -vs- State 1,3	SK1G00046182	2	8.95868283669445e-17	3.62405e-15	--	EEC75332.1 hypothetical protein OsI_11724 [Oryza sativa Indica Group]	-	-	-	-	-	-	GO:0030163//protein catabolic process
State 1,2 -vs- State 1,3	SK1G00046279	2	2.40862603773991e-20	1.21032e-18	--	XP_015632781.1 XIAP-associated factor 1 [Oryza sativa Japonica Group]	-	-	-	-	-	GO:0008270//zinc ion binding;GO:0046983//protein dimerization activity	-
State 1,2 -vs- State 1,3	SK1G00046286	3	4.20651900773955e-32	3.61034e-30	VLN2	EAZ26972.1 hypothetical protein OsJ_10899 [Oryza sativa Japonica Group]	-	-	-	-	-	GO:0003779//actin binding	GO:0007010//cytoskeleton organization
State 1,2 -vs- State 1,3	SK1G00046310	5	2.51372827498936e-09	5.79933e-08	EXPA6	EAY89916.1 hypothetical protein OsI_11465 [Oryza sativa Indica Group]	-	-	-	-	-	-	-
State 1,2 -vs- State 1,3	SK1G00046348	5	1.78631374944148e-21	9.60529e-20	At1g56220	XP_015632059.1 dormancy-associated protein homolog 3 [Oryza sativa Japonica Group]	-	-	-	-	-	-	-
State 1,2 -vs- State 1,3	SK1G00046355	4	1.26215180751033e-29	1.0005e-27	--	XP_015628910.1 uncharacterized protein LOC4332805 [Oryza sativa Japonica Group]	-	-	-	-	GO:0009523//photosystem II;GO:0009654//photosystem II oxygen evolving complex;GO:0016020//membrane;GO:0019898//extrinsic component of membrane	GO:0005509//calcium ion binding	GO:0015979//photosynthesis
State 1,2 -vs- State 1,3	SK1G00046398	5	1.45629115224244e-09	3.43847e-08	BAM9	XP_015631450.1 inactive beta-amylase 9 [Oryza sativa Japonica Group]	-	-	-	-	-	GO:0016161//beta-amylase activity	GO:0000272//polysaccharide catabolic process
State 1,2 -vs- State 1,3	SK1G00046400	4	1.0036860584301e-41	1.10988e-39	SODCC1	XP_015632608.1 superoxide dismutase [Cu-Zn] 1 [Oryza sativa Japonica Group]	Cellular Processes	Transport and catabolism	ko04146//Peroxisome	K04565	-	GO:0046872//metal ion binding	GO:0006801//superoxide metabolic process
State 1,2 -vs- State 1,3	SK1G00046413	5	2.32368554320761e-54	3.70896e-52	ERD15	EAY90021.1 hypothetical protein OsI_11591 [Oryza sativa Indica Group]	-	-	-	-	-	-	-
State 1,2 -vs- State 1,3	SK1G00046442	5	2.94460292588103e-14	9.91134e-13	NRG2	XP_015631957.1 nitrate regulatory gene2 protein isoform X1 [Oryza sativa Japonica Group]	-	-	-	-	GO:0030667//secretory granule membrane	-	GO:0006887//exocytosis
State 1,2 -vs- State 1,3	SK1G00046448	5	4.64165096880373e-13	1.43375e-11	ZBP14	EEC75152.1 hypothetical protein OsI_11358 [Oryza sativa Indica Group]	-	-	-	-	-	GO:0005525//GTP binding;GO:0070568//guanylyltransferase activity	GO:0006777//Mo-molybdopterin cofactor biosynthetic process
State 1,2 -vs- State 1,3	SK1G00046451	1	7.92903965483871e-13	2.42372e-11	elmoA	KAB8091587.1 hypothetical protein EE612_017119 [Oryza sativa]	-	-	-	-	-	-	-
State 1,2 -vs- State 1,3	SK1G00046475	4	5.4867801104942e-20	2.72217e-18	ALA1	EEC75168.1 hypothetical protein OsI_11389 [Oryza sativa Indica Group]	-	-	-	-	GO:0016021//integral component of membrane;GO:0031004//potassium ion-transporting ATPase complex	GO:0004008//copper-exporting ATPase activity;GO:0004647//phosphoserine phosphatase activity;GO:0005375//copper ion transmembrane transporter activity;GO:0005388//calcium-transporting ATPase activity;GO:0008556//potassium-transporting ATPase activity;GO:0008967//phosphoglycolate phosphatase activity;GO:0015434//cadmium-transporting ATPase activity;GO:0015444//magnesium-importing ATPase activity;GO…	GO:0006545//glycine biosynthetic process;GO:0006564//L-serine biosynthetic process;GO:0006813//potassium ion transport;GO:0006816//calcium ion transport;GO:0006825//copper ion transport;GO:0008152//metabolic process;GO:0015691//cadmium ion transport;GO:0015693//magnesium ion transport;GO:0030001//metal ion transport
State 1,2 -vs- State 1,3	SK1G00046480	5	3.67584393245223e-10	9.12494e-09	NAC046	EAY89847.1 hypothetical protein OsI_11397 [Oryza sativa Indica Group]	-	-	-	-	-	GO:0003677//DNA binding	GO:0006355//regulation of transcription, DNA-templated
State 1,2 -vs- State 1,3	SK1G00046482	5	1.30472319290549e-23	7.76123e-22	R40C1	XP_015631880.1 ricin B-like lectin R40C1 [Oryza sativa Japonica Group]	-	-	-	-	-	-	-
State 1,2 -vs- State 1,3	SK1G00046536	1	3.61024835127747e-26	2.46328e-24	TS2	XP_015628717.1 sex determination protein tasselseed-2 [Oryza sativa Japonica Group]	-	-	-	-	-	GO:0003824//catalytic activity;GO:0003854//3-beta-hydroxy-delta5-steroid dehydrogenase activity;GO:0003978//UDP-glucose 4-epimerase activity;GO:0004316//3-oxoacyl-[acyl-carrier-protein] reductase (NADPH) activity;GO:0004757//sepiapterin reductase activity;GO:0008460//dTDP-glucose 4,6-dehydratase activity;GO:0008667//2,3-dihydro-2,3-dihydroxybenzoate dehydrogenase activity;GO:0008678//2-deoxy-D-gl…	GO:0000272//polysaccharide catabolic process;GO:0006012//galactose metabolic process;GO:0006631//fatty acid metabolic process;GO:0006633//fatty acid biosynthetic process;GO:0006694//steroid biosynthetic process;GO:0006729//tetrahydrobiopterin biosynthetic process;GO:0008152//metabolic process;GO:0009243//O antigen biosynthetic process;GO:0015995//chlorophyll biosynthetic process;GO:0019305//dTDP-…
State 1,2 -vs- State 1,3	SK1G00046543	2	0	0	PR1	EEC75066.1 hypothetical protein OsI_11186 [Oryza sativa Indica Group]	Genetic Information Processing	Translation	ko03008//Ribosome biogenesis in eukaryotes	K14546	GO:0009279//cell outer membrane	GO:0005515//protein binding	GO:0006952//defense response
State 1,2 -vs- State 1,3	SK1G00046545	4	6.16400329079915e-18	2.70779e-16	dnajb6-a	XP_015628525.1 uncharacterized protein LOC4332570 [Oryza sativa Japonica Group]	-	-	-	-	-	GO:0003674//molecular_function;GO:0005515//protein binding	GO:0006457//protein folding;GO:0009408//response to heat;GO:0043571//maintenance of CRISPR repeat elements
State 1,2 -vs- State 1,3	SK1G00046559	4	1.88640502673548e-28	1.41581e-26	--	EAY89669.1 hypothetical protein OsI_11202 [Oryza sativa Indica Group]	-	-	-	-	GO:0005680//anaphase-promoting complex	GO:0003723//RNA binding;GO:0008270//zinc ion binding;GO:0046872//metal ion binding;GO:0061630//ubiquitin protein ligase activity;GO:0097602//cullin family protein binding	GO:0031145//anaphase-promoting complex-dependent proteasomal ubiquitin-dependent protein catabolic process
State 1,2 -vs- State 1,3	SK1G00046587	4	1.07393432994019e-29	8.55147e-28	CP12-1	EAY89700.1 hypothetical protein OsI_11237 [Oryza sativa Indica Group]	-	-	-	-	-	-	-
State 1,2 -vs- State 1,3	SK1G00046599	2	8.31250961439326e-23	4.78342e-21	UBC32	KAB8091484.1 hypothetical protein EE612_016978 [Oryza sativa]	Genetic Information Processing;Genetic Information Processing	Folding, sorting and degradation;Folding, sorting and degradation	ko04141//Protein processing in endoplasmic reticulum;ko04120//Ubiquitin mediated proteolysis	K10578;K10578	-	GO:0005515//protein binding	-
State 1,2 -vs- State 1,3	SK1G00046616	2	2.38171292903773e-10	6.03989e-09	ECHIA	ABF95571.1 enoyl-CoA hydratase/isomerase family protein, expressed [Oryza sativa Japonica Group]	Metabolism;Metabolism;Metabolism;Metabolism;Metabolism;Metabolism;Metabolism;Metabolism;Metabolism;Metabolism;Metabolism;Metabolism	Global and overview maps;Global and overview maps;Global and overview maps;Amino acid metabolism;Lipid metabolism;Amino acid metabolism;Metabolism of other amino acids;Amino acid metabolism;Amino acid metabolism;Carbohydrate metabolism;Carbohydrate metabolism;Metabolism of terpenoids and polyketides	ko01100//Metabolic pathways;ko01110//Biosynthesis of secondary metabolites;ko01212//Fatty acid metabolism;ko00380//Tryptophan metabolism;ko00071//Fatty acid degradation;ko00280//Valine, leucine and isoleucine degradation;ko00410//beta-Alanine metabolism;ko00310//Lysine degradation;ko00360//Phenylalanine metabolism;ko00640//Propanoate metabolism;ko00650//Butanoate metabolism;ko00903//Limonene and …	K01692;K01692;K01692;K01692;K01692;K01692;K01692;K01692;K01692;K01692;K01692;K01692	GO:0016507//mitochondrial fatty acid beta-oxidation multienzyme complex	GO:0003824//catalytic activity;GO:0003857//3-hydroxyacyl-CoA dehydrogenase activity;GO:0003860//3-hydroxyisobutyryl-CoA hydrolase activity;GO:0004165//dodecenoyl-CoA delta-isomerase activity;GO:0004300//enoyl-CoA hydratase activity;GO:0008692//3-hydroxybutyryl-CoA epimerase activity;GO:0008935//1,4-dihydroxy-2-naphthoyl-CoA synthase activity;GO:0016787//hydrolase activity;GO:0016830//carbon-carbo…	GO:0006635//fatty acid beta-oxidation;GO:0009062//fatty acid catabolic process;GO:0009234//menaquinone biosynthetic process;GO:0010124//phenylacetate catabolic process;GO:0010128//benzoate catabolic process via CoA ligation;GO:0019439//aromatic compound catabolic process
State 1,2 -vs- State 1,3	SK1G00046621	5	3.94396575220232e-46	5.0775e-44	CP1	EAY89735.1 hypothetical protein OsI_11276 [Oryza sativa Indica Group]	Organismal Systems;Environmental Information Processing;Environmental Information Processing	Environmental adaptation;Signal transduction;Signal transduction	ko04626//Plant-pathogen interaction;ko04016//MAPK signaling pathway - plant;ko04070//Phosphatidylinositol signaling system	K02183;K02183;K02183	-	GO:0005509//calcium ion binding;GO:0005515//protein binding	-
State 1,2 -vs- State 1,3	SK1G00046627	4	4.1468385099868e-28	3.05386e-26	CRRSP55	KAB8091519.1 hypothetical protein EE612_017025 [Oryza sativa]	-	-	-	-	-	-	-
State 1,2 -vs- State 1,3	SK1G00046647	3	2.5116401984755e-142	1.61087e-139	GOLS1	EAY89768.1 hypothetical protein OsI_11309 [Oryza sativa Indica Group]	Metabolism;Metabolism	Global and overview maps;Carbohydrate metabolism	ko01100//Metabolic pathways;ko00052//Galactose metabolism	K18819;K18819	-	GO:0016757//transferase activity, transferring glycosyl groups	GO:0006486//protein glycosylation
State 1,2 -vs- State 1,3	SK1G00046650	2	1.79363310211291e-09	4.20961e-08	ABCI20	XP_015628219.1 ABC transporter I family member 20 isoform X1 [Oryza sativa Japonica Group]	Genetic Information Processing	Folding, sorting and degradation	ko03018//RNA degradation	K12608	GO:0005575//cellular_component;GO:0005887//integral component of plasma membrane;GO:0009898//cytoplasmic side of plasma membrane;GO:0016021//integral component of membrane;GO:0043190//ATP-binding cassette (ABC) transporter complex;GO:0055051//ATP-binding cassette (ABC) transporter complex, integrated substrate binding;GO:0055052//ATP-binding cassette (ABC) transporter complex, substrate-binding s…	GO:0005260//channel-conductance-controlling ATPase activity;GO:0005319//lipid transporter activity;GO:0005524//ATP binding;GO:0008565//protein transporter activity;GO:0015220//choline transmembrane transporter activity;GO:0015221//lipopolysaccharide transmembrane transporter activity;GO:0015412//molybdate transmembrane-transporting ATPase activity;GO:0015413//nickel-transporting ATPase activity;G…	GO:0000910//cytokinesis;GO:0006810//transport;GO:0006817//phosphate ion transport;GO:0006824//cobalt ion transport;GO:0006869//lipid transport;GO:0007601//visual perception;GO:0008150//biological_process;GO:0008272//sulfate transport;GO:0015675//nickel cation transport;GO:0015689//molybdate ion transport;GO:0015706//nitrate transport;GO:0015716//organic phosphonate transport;GO:0015753//D-xylose …
State 1,2 -vs- State 1,3	SK1G00046706	4	9.4155356463998e-12	2.65706e-10	MPK5	AAK01710.1 MAP kinase BIMK1 [Oryza sativa Indica Group]	Organismal Systems;Environmental Information Processing	Environmental adaptation;Signal transduction	ko04626//Plant-pathogen interaction;ko04016//MAPK signaling pathway - plant	K20536;K20536	-	GO:0004672//protein kinase activity;GO:0005524//ATP binding	GO:0006468//protein phosphorylation
State 1,2 -vs- State 1,3	SK1G00046710	4	9.0592333515e-10	2.16654e-08	At3g11320	XP_015630990.1 probable sugar phosphate/phosphate translocator At3g11320 [Oryza sativa Japonica Group]	-	-	-	-	GO:0016020//membrane;GO:0016021//integral component of membrane	-	GO:0055085//transmembrane transport
State 1,2 -vs- State 1,3	SK1G00046716	4	2.01371806373311e-18	9.17751e-17	LBD1	XP_015629326.1 LOB domain-containing protein 1 [Oryza sativa Japonica Group]	-	-	-	-	-	-	-
State 1,2 -vs- State 1,3	SK1G00046720	3	9.9323530392435e-12	2.79843e-10	MT1B	XP_015628821.1 metallothionein-like protein 1B [Oryza sativa Japonica Group]	-	-	-	-	-	GO:0008270//zinc ion binding;GO:0046872//metal ion binding	-
State 1,2 -vs- State 1,3	SK1G00046737	4	2.87397164647872e-12	8.37154e-11	FAD7	BAE79783.1 plastid omega-3 fatty acid desaturase [Oryza sativa Japonica Group]	-	-	-	-	-	GO:0016717//oxidoreductase activity, acting on paired donors, with oxidation of a pair of donors resulting in the reduction of molecular oxygen to two molecules of water	GO:0006629//lipid metabolic process;GO:0055114//oxidation-reduction process
State 1,2 -vs- State 1,3	SK1G00046740	5	7.99745303019901e-15	2.82959e-13	Os03g0291500	XP_015632089.1 asparagine synthetase [glutamine-hydrolyzing] 1 [Oryza sativa Japonica Group]	Metabolism;Metabolism;Metabolism;Metabolism	Global and overview maps;Global and overview maps;Global and overview maps;Amino acid metabolism	ko01100//Metabolic pathways;ko01110//Biosynthesis of secondary metabolites;ko01230//Biosynthesis of amino acids;ko00250//Alanine, aspartate and glutamate metabolism	K01953;K01953;K01953;K01953	GO:0005737//cytoplasm	GO:0004044//amidophosphoribosyltransferase activity;GO:0004066//asparagine synthase (glutamine-hydrolyzing) activity;GO:0004360//glutamine-fructose-6-phosphate transaminase (isomerizing) activity;GO:0008795//NAD+ synthase activity	GO:0006040//amino sugar metabolic process;GO:0006529//asparagine biosynthetic process;GO:0009152//purine ribonucleotide biosynthetic process;GO:0009252//peptidoglycan biosynthetic process;GO:0009435//NAD biosynthetic process
State 1,2 -vs- State 1,3	SK1G00046765	3	8.1278644816094e-14	2.64006e-12	STY46	XP_015631449.1 RAF proto-oncogene serine/threonine-protein kinase [Oryza sativa Japonica Group]	-	-	-	-	-	GO:0004672//protein kinase activity;GO:0005524//ATP binding	GO:0006468//protein phosphorylation
State 1,2 -vs- State 1,3	SK1G00046777	5	1.41581452403735e-25	9.28306e-24	RPS7	XP_015631394.1 40S ribosomal protein S7-like [Oryza sativa Japonica Group]	Genetic Information Processing	Translation	ko03010//Ribosome	K02993	GO:0005840//ribosome	GO:0003735//structural constituent of ribosome	GO:0006412//translation
State 1,2 -vs- State 1,3	SK1G00046778	5	4.87894159987554e-11	1.30481e-09	RPS7	XP_015631395.1 40S ribosomal protein S7-like [Oryza sativa Japonica Group]	Genetic Information Processing	Translation	ko03010//Ribosome	K02993	GO:0005840//ribosome	GO:0003735//structural constituent of ribosome	GO:0006412//translation
State 1,2 -vs- State 1,3	SK1G00046809	4	2.51169690566369e-09	5.79844e-08	CRPK1	EEC74913.1 hypothetical protein OsI_10854 [Oryza sativa Indica Group]	-	-	-	-	-	GO:0004672//protein kinase activity;GO:0005524//ATP binding	GO:0006468//protein phosphorylation
State 1,2 -vs- State 1,3	SK1G00046817	2	4.16185132848196e-08	8.41796e-07	PXN	XP_015628226.1 peroxisomal nicotinamide adenine dinucleotide carrier [Oryza sativa Japonica Group]	Cellular Processes	Transport and catabolism	ko04146//Peroxisome	K13354	-	-	-
State 1,2 -vs- State 1,3	SK1G00046824	4	1.0059321765438e-15	3.79511e-14	--	ABF95142.1 expressed protein [Oryza sativa Japonica Group]	-	-	-	-	-	-	-
State 1,2 -vs- State 1,3	SK1G00046826	5	7.16746674075283e-26	4.77042e-24	WLIN2A	XP_015630472.1 LIM domain-containing protein WLIM2a [Oryza sativa Japonica Group]	-	-	-	-	-	-	-
State 1,2 -vs- State 1,3	SK1G00046834	5	1.02099465288281e-35	9.81351e-34	HSP17.4	XP_015631117.1 17.4 kDa class I heat shock protein [Oryza sativa Japonica Group]	Genetic Information Processing	Folding, sorting and degradation	ko04141//Protein processing in endoplasmic reticulum	K13993	-	-	-
State 1,2 -vs- State 1,3	SK1G00046837	4	1.63232113260593e-13	5.1874e-12	--	XP_015631386.1 uncharacterized protein LOC4332365 [Oryza sativa Japonica Group]	-	-	-	-	-	-	-
State 1,2 -vs- State 1,3	SK1G00046855	4	6.36038126462568e-11	1.68567e-09	--	EAY89404.1 hypothetical protein OsI_10909 [Oryza sativa Indica Group]	-	-	-	-	GO:0016020//membrane	GO:0016757//transferase activity, transferring glycosyl groups;GO:0016758//transferase activity, transferring hexosyl groups	GO:0006486//protein glycosylation
State 1,2 -vs- State 1,3	SK1G00046878	2	2.23543882324431e-42	2.55195e-40	--	XP_015633236.1 suppressor of disruption of TFIIS [Oryza sativa Japonica Group]	-	-	-	-	-	GO:0008801//beta-phosphoglucomutase activity;GO:0008967//phosphoglycolate phosphatase activity;GO:0016787//hydrolase activity;GO:0016791//phosphatase activity;GO:0016862//intramolecular oxidoreductase activity, interconverting keto- and enol-groups;GO:0018784//(S)-2-haloacid dehalogenase activity	GO:0006805//xenobiotic metabolic process;GO:0008152//metabolic process;GO:0009853//photorespiration;GO:0015671//oxygen transport;GO:0019509//L-methionine biosynthetic process from methylthioadenosine;GO:0043094//cellular metabolic compound salvage;GO:0046352//disaccharide catabolic process
State 1,2 -vs- State 1,3	SK1G00046881	4	2.33194614608037e-34	2.13661e-32	TRP5	EEC74957.1 hypothetical protein OsI_10944 [Oryza sativa Indica Group]	-	-	-	-	-	GO:0005515//protein binding	-
State 1,2 -vs- State 1,3	SK1G00046894	3	7.65907069957238e-22	4.19043e-20	HSP70	XP_015630538.1 heat shock cognate 70 kDa protein 2 [Oryza sativa Japonica Group]	Genetic Information Processing;Genetic Information Processing;Cellular Processes	Folding, sorting and degradation;Transcription;Transport and catabolism	ko04141//Protein processing in endoplasmic reticulum;ko03040//Spliceosome;ko04144//Endocytosis	K03283;K03283;K03283	-	GO:0004856//xylulokinase activity;GO:0005515//protein binding;GO:0005524//ATP binding;GO:0016773//phosphotransferase activity, alcohol group as acceptor;GO:0016787//hydrolase activity;GO:0016887//ATPase activity;GO:0051082//unfolded protein binding	GO:0005975//carbohydrate metabolic process;GO:0005997//xylulose metabolic process;GO:0006457//protein folding;GO:0006950//response to stress;GO:0008360//regulation of cell shape;GO:0042732//D-xylose metabolic process;GO:0043093//FtsZ-dependent cytokinesis
State 1,2 -vs- State 1,3	SK1G00046901	4	6.28919380325435e-10	1.52266e-08	CRRSP55	XP_015628566.1 cysteine-rich repeat secretory protein 55 [Oryza sativa Japonica Group]	-	-	-	-	-	-	-
State 1,2 -vs- State 1,3	SK1G00046904	5	4.56761433046808e-60	8.70933e-58	UXS3	XP_015632111.1 UDP-glucuronic acid decarboxylase 6 [Oryza sativa Japonica Group]	Metabolism;Metabolism	Global and overview maps;Carbohydrate metabolism	ko01100//Metabolic pathways;ko00520//Amino sugar and nucleotide sugar metabolism	K08678;K08678	-	GO:0003824//catalytic activity;GO:0003854//3-beta-hydroxy-delta5-steroid dehydrogenase activity;GO:0003978//UDP-glucose 4-epimerase activity;GO:0004043//L-aminoadipate-semialdehyde dehydrogenase activity;GO:0008446//GDP-mannose 4,6-dehydratase activity;GO:0008460//dTDP-glucose 4,6-dehydratase activity;GO:0008712//ADP-glyceromanno-heptose 6-epimerase activity;GO:0008831//dTDP-4-dehydrorhamnose red…	GO:0000271//polysaccharide biosynthetic process;GO:0005975//carbohydrate metabolic process;GO:0006012//galactose metabolic process;GO:0006694//steroid biosynthetic process;GO:0009243//O antigen biosynthetic process;GO:0009244//lipopolysaccharide core region biosynthetic process;GO:0019305//dTDP-rhamnose biosynthetic process;GO:0019878//lysine biosynthetic process via aminoadipic acid;GO:0055114//…
State 1,2 -vs- State 1,3	SK1G00046906	5	6.09754047200246e-18	2.68193e-16	ALY1	EAY89467.1 hypothetical protein OsI_10999 [Oryza sativa Indica Group]	Genetic Information Processing;Genetic Information Processing;Genetic Information Processing	Transcription;Translation;Translation	ko03040//Spliceosome;ko03013//RNA transport;ko03015//mRNA surveillance pathway	K12881;K12881;K12881	-	GO:0003676//nucleic acid binding;GO:0003723//RNA binding	GO:0008380//RNA splicing
State 1,2 -vs- State 1,3	SK1G00046945	3	6.46365693037908e-64	1.3653e-61	--	EAY89269.1 hypothetical protein OsI_10767 [Oryza sativa Indica Group]	-	-	-	-	-	GO:0005509//calcium ion binding	-
State 1,2 -vs- State 1,3	SK1G00046968	2	2.55042452152578e-22	1.42352e-20	--	XP_015628295.1 uncharacterized protein LOC4332279 [Oryza sativa Japonica Group]	-	-	-	-	-	-	-
State 1,2 -vs- State 1,3	SK1G00046982	2	2.2137374014564e-46	2.90296e-44	PCKA	EAY89301.1 hypothetical protein OsI_10803 [Oryza sativa Indica Group]	Metabolism;Metabolism;Metabolism;Metabolism;Metabolism;Metabolism;Metabolism	Global and overview maps;Global and overview maps;Global and overview maps;Carbohydrate metabolism;Carbohydrate metabolism;Energy metabolism;Carbohydrate metabolism	ko01100//Metabolic pathways;ko01110//Biosynthesis of secondary metabolites;ko01200//Carbon metabolism;ko00010//Glycolysis / Gluconeogenesis;ko00620//Pyruvate metabolism;ko00710//Carbon fixation in photosynthetic organisms;ko00020//Citrate cycle (TCA cycle)	K01610;K01610;K01610;K01610;K01610;K01610;K01610	-	GO:0004612//phosphoenolpyruvate carboxykinase (ATP) activity;GO:0005524//ATP binding	GO:0006094//gluconeogenesis
State 1,2 -vs- State 1,3	SK1G00046993	2	1.59520961957995e-16	6.3655e-15	CXE17	XP_015628734.1 probable carboxylesterase 17 [Oryza sativa Japonica Group]	-	-	-	-	-	GO:0016787//hydrolase activity	GO:0009058//biosynthetic process
State 1,2 -vs- State 1,3	SK1G00047005	1	2.0180721140664e-99	8.375e-97	MYOB2	XP_015632393.1 myosin-binding protein 2 isoform X3 [Oryza sativa Japonica Group]	-	-	-	-	-	-	-
State 1,2 -vs- State 1,3	SK1G00047010	3	2.31418692157819e-11	6.35771e-10	PLA2-II	XP_015629036.1 probable phospholipase A2 homolog 2 isoform X2 [Oryza sativa Japonica Group]	-	-	-	-	-	GO:0004623//phospholipase A2 activity	GO:0006644//phospholipid metabolic process;GO:0050482//arachidonic acid secretion
State 1,2 -vs- State 1,3	SK1G00047030	1	1.64818946016466e-13	5.22841e-12	BCAT5	XP_015630708.1 branched-chain-amino-acid aminotransferase 2, chloroplastic [Oryza sativa Japonica Group]	Metabolism;Metabolism;Metabolism;Metabolism;Metabolism;Metabolism;Metabolism;Metabolism;Metabolism	Global and overview maps;Global and overview maps;Global and overview maps;Amino acid metabolism;Global and overview maps;Amino acid metabolism;Metabolism of cofactors and vitamins;Amino acid metabolism;Biosynthesis of other secondary metabolites	ko01100//Metabolic pathways;ko01110//Biosynthesis of secondary metabolites;ko01230//Biosynthesis of amino acids;ko00270//Cysteine and methionine metabolism;ko01210//2-Oxocarboxylic acid metabolism;ko00280//Valine, leucine and isoleucine degradation;ko00770//Pantothenate and CoA biosynthesis;ko00290//Valine, leucine and isoleucine biosynthesis;ko00966//Glucosinolate biosynthesis	K00826;K00826;K00826;K00826;K00826;K00826;K00826;K00826;K00826	-	GO:0003824//catalytic activity;GO:0004084//branched-chain-amino-acid transaminase activity;GO:0008696//4-amino-4-deoxychorismate lyase activity;GO:0047810//D-alanine:2-oxoglutarate aminotransferase activity	GO:0008153//para-aminobenzoic acid biosynthetic process;GO:0009082//branched-chain amino acid biosynthetic process;GO:0009396//folic acid-containing compound biosynthetic process;GO:0019480//L-alanine oxidation to pyruvate via D-alanine
State 1,2 -vs- State 1,3	SK1G00047042	2	2.10787612798837e-10	5.36087e-09	At2g23790	XP_015629297.1 calcium uniporter protein 4, mitochondrial [Oryza sativa Japonica Group]	-	-	-	-	-	-	-
State 1,2 -vs- State 1,3	SK1G00047050	5	1.77205818244094e-13	5.61629e-12	Ub-CEP52-1	XP_006649691.1 PREDICTED: ubiquitin-60S ribosomal protein L40-2 [Oryza brachyantha]	Genetic Information Processing	Translation	ko03010//Ribosome	K02927	GO:0005840//ribosome	GO:0003735//structural constituent of ribosome;GO:0005515//protein binding	GO:0006289//nucleotide-excision repair;GO:0006412//translation
State 1,2 -vs- State 1,3	SK1G00047057	2	1.80689530071677e-19	8.74324e-18	GAD1	EAY89173.1 hypothetical protein OsI_10669 [Oryza sativa Indica Group]	Metabolism;Metabolism;Metabolism;Metabolism;Metabolism;Metabolism	Global and overview maps;Global and overview maps;Amino acid metabolism;Metabolism of other amino acids;Carbohydrate metabolism;Metabolism of other amino acids	ko01100//Metabolic pathways;ko01110//Biosynthesis of secondary metabolites;ko00250//Alanine, aspartate and glutamate metabolism;ko00410//beta-Alanine metabolism;ko00650//Butanoate metabolism;ko00430//Taurine and hypotaurine metabolism	K01580;K01580;K01580;K01580;K01580;K01580	-	GO:0004351//glutamate decarboxylase activity;GO:0004837//tyrosine decarboxylase activity;GO:0016831//carboxy-lyase activity;GO:0030170//pyridoxal phosphate binding	GO:0006540//glutamate decarboxylation to succinate;GO:0006572//tyrosine catabolic process;GO:0015940//pantothenate biosynthetic process;GO:0019752//carboxylic acid metabolic process;GO:0051188//cofactor biosynthetic process
State 1,2 -vs- State 1,3	SK1G00047094	5	6.75623022650947e-17	2.77123e-15	--	EAY89206.1 hypothetical protein OsI_10702 [Oryza sativa Indica Group]	-	-	-	-	-	-	-
State 1,2 -vs- State 1,3	SK1G00047098	3	1.90845796285462e-63	3.93689e-61	ERD7	EAY89209.1 hypothetical protein OsI_10705 [Oryza sativa Indica Group]	Cellular Processes	Transport and catabolism	ko04144//Endocytosis	K19366	-	-	-
State 1,2 -vs- State 1,3	SK1G00047105	2	2.72407300539404e-10	6.8539e-09	ADF5	XP_015631622.1 actin-depolymerizing factor 5 [Oryza sativa Japonica Group]	-	-	-	-	-	GO:0003779//actin binding	-
State 1,2 -vs- State 1,3	SK1G00047117	5	2.52745281836784e-08	5.25683e-07	TLP1	XP_015631808.1 thaumatin-like protein 1b isoform X1 [Oryza sativa Japonica Group]	-	-	-	-	-	-	-
State 1,2 -vs- State 1,3	SK1G00047139	4	5.03523956051394e-11	1.34356e-09	NRP1	XP_015632941.1 glycine-rich cell wall structural protein 1.8 [Oryza sativa Japonica Group]	-	-	-	-	-	-	-
State 1,2 -vs- State 1,3	SK1G00047169	3	4.55195989787995e-12	1.31507e-10	MODD	EAY89035.1 hypothetical protein OsI_10519 [Oryza sativa Indica Group]	-	-	-	-	-	GO:0003677//DNA binding	-
State 1,2 -vs- State 1,3	SK1G00047196	2	1.39710615703223e-46	1.83891e-44	MST4	EEC74774.1 hypothetical protein OsI_10546 [Oryza sativa Indica Group]	-	-	-	-	GO:0005887//integral component of plasma membrane;GO:0016021//integral component of membrane	GO:0015295//solute:proton symporter activity;GO:0022857//transmembrane transporter activity;GO:0051119//sugar transmembrane transporter activity	GO:0006810//transport;GO:0008643//carbohydrate transport;GO:0055085//transmembrane transport
State 1,2 -vs- State 1,3	SK1G00047204	4	2.2799482414054e-41	2.49768e-39	RPL15	XP_015631945.1 50S ribosomal protein L15, chloroplastic [Oryza sativa Japonica Group]	Genetic Information Processing	Translation	ko03010//Ribosome	K02876	GO:0000315//organellar large ribosomal subunit;GO:0022625//cytosolic large ribosomal subunit	GO:0003735//structural constituent of ribosome	GO:0006412//translation
State 1,2 -vs- State 1,3	SK1G00047205	4	2.11921866600983e-34	1.94676e-32	CUT1	XP_015632982.1 3-ketoacyl-CoA synthase 6 [Oryza sativa Japonica Group]	Metabolism;Metabolism;Organismal Systems;Metabolism	Global and overview maps;Global and overview maps;Environmental adaptation;Lipid metabolism	ko01100//Metabolic pathways;ko01110//Biosynthesis of secondary metabolites;ko04626//Plant-pathogen interaction;ko00062//Fatty acid elongation	K15397;K15397;K15397;K15397	GO:0016020//membrane	GO:0003985//acetyl-CoA C-acetyltransferase activity;GO:0004315//3-oxoacyl-[acyl-carrier-protein] synthase activity;GO:0004421//hydroxymethylglutaryl-CoA synthase activity;GO:0016747//transferase activity, transferring acyl groups other than amino-acyl groups	GO:0006631//fatty acid metabolic process;GO:0006633//fatty acid biosynthetic process
State 1,2 -vs- State 1,3	SK1G00047211	2	1.79143603712058e-26	1.24151e-24	HMT-1	XP_015632081.1 homocysteine S-methyltransferase 1 [Oryza sativa Japonica Group]	Metabolism;Metabolism;Metabolism	Global and overview maps;Global and overview maps;Amino acid metabolism	ko01100//Metabolic pathways;ko01110//Biosynthesis of secondary metabolites;ko00270//Cysteine and methionine metabolism	K00547;K00547;K00547	-	GO:0008705//methionine synthase activity	GO:0009086//methionine biosynthetic process
State 1,2 -vs- State 1,3	SK1G00047222	5	2.18437993200872e-08	4.57837e-07	PXG	BAH01599.1 unnamed protein product [Oryza sativa Japonica Group]	Metabolism	Lipid metabolism	ko00073//Cutin, suberine and wax biosynthesis	K17991	-	GO:0005509//calcium ion binding	-
State 1,2 -vs- State 1,3	SK1G00047227	2	1.54046851623911e-54	2.47e-52	GLN1-2	XP_015631679.1 glutamine synthetase cytosolic isozyme 1-2 [Oryza sativa Japonica Group]	Metabolism;Metabolism;Metabolism;Metabolism;Metabolism;Metabolism	Global and overview maps;Global and overview maps;Carbohydrate metabolism;Amino acid metabolism;Amino acid metabolism;Energy metabolism	ko01100//Metabolic pathways;ko01230//Biosynthesis of amino acids;ko00630//Glyoxylate and dicarboxylate metabolism;ko00250//Alanine, aspartate and glutamate metabolism;ko00220//Arginine biosynthesis;ko00910//Nitrogen metabolism	K01915;K01915;K01915;K01915;K01915;K01915	-	GO:0004356//glutamate-ammonia ligase activity	GO:0006542//glutamine biosynthetic process;GO:0006807//nitrogen compound metabolic process
State 1,2 -vs- State 1,3	SK1G00047234	2	4.18995793980581e-14	1.39172e-12	RR21	A2XE31.1 RecName: Full=Two-component response regulator ORR21 [Oryza sativa Indica Group]	Environmental Information Processing	Signal transduction	ko04075//Plant hormone signal transduction	K14491	GO:0016020//membrane	GO:0000156//phosphorelay response regulator activity;GO:0003677//DNA binding;GO:0003700//transcription factor activity, sequence-specific DNA binding;GO:0004673//protein histidine kinase activity;GO:0005524//ATP binding	GO:0000160//phosphorelay signal transduction system;GO:0006355//regulation of transcription, DNA-templated;GO:0006796//phosphate-containing compound metabolic process;GO:0006808//regulation of nitrogen utilization;GO:0030436//asexual sporulation;GO:0042173//regulation of sporulation resulting in formation of a cellular spore
State 1,2 -vs- State 1,3	SK1G00047236	4	3.85445805247799e-11	1.04109e-09	HSFA9	XP_015633341.1 heat stress transcription factor A-9 [Oryza sativa Japonica Group]	-	-	-	-	-	GO:0003700//transcription factor activity, sequence-specific DNA binding;GO:0043565//sequence-specific DNA binding	GO:0006355//regulation of transcription, DNA-templated
State 1,2 -vs- State 1,3	SK1G00047246	4	1.93005393132327e-16	7.64974e-15	HB2	XP_015628351.1 non-symbiotic hemoglobin 2 [Oryza sativa Japonica Group]	-	-	-	-	GO:0016020//membrane	GO:0016757//transferase activity, transferring glycosyl groups;GO:0020037//heme binding	-
State 1,2 -vs- State 1,3	SK1G00047260	5	6.38723222669739e-15	2.28432e-13	--	AAN60995.1 Unknown protein [Oryza sativa Japonica Group]	-	-	-	-	-	-	-
State 1,2 -vs- State 1,3	SK1G00047266	4	1.51740021306267e-25	9.93067e-24	RINO1	AAP85531.1 myo-inositol-1-phosphate synthase INO1 [Xerophyta viscosa]	Metabolism;Metabolism;Metabolism	Global and overview maps;Global and overview maps;Carbohydrate metabolism	ko01100//Metabolic pathways;ko01110//Biosynthesis of secondary metabolites;ko00562//Inositol phosphate metabolism	K01858;K01858;K01858	-	GO:0004512//inositol-3-phosphate synthase activity	GO:0006021//inositol biosynthetic process;GO:0008654//phospholipid biosynthetic process
State 1,2 -vs- State 1,3	SK1G00047281	2	3.87811638795901e-57	6.73894e-55	--	EAY88889.1 hypothetical protein OsI_10368 [Oryza sativa Indica Group]	-	-	-	-	-	-	-
State 1,2 -vs- State 1,3	SK1G00047282	2	1.11570370001189e-10	2.89599e-09	At3g25290	EAY88890.1 hypothetical protein OsI_10369 [Oryza sativa Indica Group]	-	-	-	-	-	-	-
State 1,2 -vs- State 1,3	SK1G00047294	5	6.15889933502293e-12	1.75773e-10	RPS10	RLN19930.1 30S ribosomal protein S10, chloroplastic [Panicum miliaceum]	Genetic Information Processing	Translation	ko03010//Ribosome	K02946	GO:0000314//organellar small ribosomal subunit;GO:0022627//cytosolic small ribosomal subunit	GO:0003735//structural constituent of ribosome;GO:0003824//catalytic activity;GO:0008236//serine-type peptidase activity;GO:0016787//hydrolase activity;GO:0047570//3-oxoadipate enol-lactonase activity	GO:0006412//translation;GO:0006508//proteolysis;GO:0009102//biotin biosynthetic process;GO:0042952//beta-ketoadipate pathway
State 1,2 -vs- State 1,3	SK1G00047319	5	2.336385234159e-09	5.40787e-08	RPS3A	XP_015631418.1 40S ribosomal protein S3a [Oryza sativa Japonica Group]	Genetic Information Processing	Translation	ko03010//Ribosome	K02984	GO:0005840//ribosome	GO:0003690//double-stranded DNA binding;GO:0003735//structural constituent of ribosome	GO:0006355//regulation of transcription, DNA-templated;GO:0006412//translation;GO:0006629//lipid metabolic process
State 1,2 -vs- State 1,3	SK1G00047321	2	3.40381584496846e-25	2.18706e-23	ARL8A	XP_015632512.1 ADP-ribosylation factor-like protein 8a [Oryza sativa Japonica Group]	-	-	-	-	GO:0005737//cytoplasm;GO:0009898//cytoplasmic side of plasma membrane;GO:0055052//ATP-binding cassette (ABC) transporter complex, substrate-binding subunit-containing	GO:0003743//translation initiation factor activity;GO:0003924//GTPase activity;GO:0005524//ATP binding;GO:0005525//GTP binding;GO:0019001//guanyl nucleotide binding;GO:0019843//rRNA binding;GO:0031683//G-protein beta/gamma-subunit complex binding;GO:0033221//urea-transporting ATPase activity;GO:0043022//ribosome binding;GO:0051539//4 iron, 4 sulfur cluster binding	GO:0006400//tRNA modification;GO:0006412//translation;GO:0006413//translational initiation;GO:0006950//response to stress;GO:0007186//G-protein coupled receptor signaling pathway;GO:0008150//biological_process;GO:0015840//urea transport;GO:0042254//ribosome biogenesis;GO:0051186//cofactor metabolic process
State 1,2 -vs- State 1,3	SK1G00047330	5	2.87277921170128e-11	7.82527e-10	VDAC5	XP_015632717.1 mitochondrial outer membrane protein porin 5 [Oryza sativa Japonica Group]	-	-	-	-	GO:0005741//mitochondrial outer membrane	-	GO:0055085//transmembrane transport
State 1,2 -vs- State 1,3	SK1G00047337	2	2.39197851745537e-11	6.5561e-10	--	EEC74712.1 hypothetical protein OsI_10431 [Oryza sativa Indica Group]	-	-	-	-	-	-	-
State 1,2 -vs- State 1,3	SK1G00047338	2	2.58805458773405e-08	5.37337e-07	ACA2	XP_015631775.1 calcium-transporting ATPase 2, plasma membrane-type [Oryza sativa Japonica Group]	-	-	-	-	GO:0031004//potassium ion-transporting ATPase complex	GO:0004008//copper-exporting ATPase activity;GO:0004647//phosphoserine phosphatase activity;GO:0005375//copper ion transmembrane transporter activity;GO:0005388//calcium-transporting ATPase activity;GO:0005516//calmodulin binding;GO:0008556//potassium-transporting ATPase activity;GO:0008967//phosphoglycolate phosphatase activity;GO:0015434//cadmium-transporting ATPase activity;GO:0015444//magnesi…	GO:0006545//glycine biosynthetic process;GO:0006564//L-serine biosynthetic process;GO:0006813//potassium ion transport;GO:0006816//calcium ion transport;GO:0006825//copper ion transport;GO:0008152//metabolic process;GO:0015691//cadmium ion transport;GO:0015693//magnesium ion transport;GO:0030001//metal ion transport
State 1,2 -vs- State 1,3	SK1G00047339	3	1.22684249078259e-08	2.63562e-07	CYCD5-3	EEC74713.1 hypothetical protein OsI_10433 [Oryza sativa Indica Group]	-	-	-	-	-	-	-
State 1,2 -vs- State 1,3	SK1G00047365	4	3.92678950250116e-14	1.30924e-12	Os03g0207400	EAY88976.1 hypothetical protein OsI_10462 [Oryza sativa Indica Group]	-	-	-	-	GO:0005887//integral component of plasma membrane;GO:0055052//ATP-binding cassette (ABC) transporter complex, substrate-binding subunit-containing	GO:0015413//nickel-transporting ATPase activity;GO:0016791//phosphatase activity	GO:0015675//nickel cation transport
State 1,2 -vs- State 1,3	SK1G00047423	4	4.37221062909902e-24	2.66833e-22	YLMG2	EEC74625.1 hypothetical protein OsI_10244 [Oryza sativa Indica Group]	-	-	-	-	GO:0016020//membrane	-	-
State 1,2 -vs- State 1,3	SK1G00047440	2	2.60337644338301e-28	1.94152e-26	TIFY11C	XP_015633146.1 protein TIFY 11c [Oryza sativa Japonica Group]	Environmental Information Processing	Signal transduction	ko04075//Plant hormone signal transduction	K13464	-	GO:0005515//protein binding	-
State 1,2 -vs- State 1,3	SK1G00047447	4	1.36499517140916e-22	7.72876e-21	--	EAY88795.1 hypothetical protein OsI_10268 [Oryza sativa Indica Group]	-	-	-	-	-	-	-
State 1,2 -vs- State 1,3	SK1G00047453	2	1.74637259261543e-11	4.83163e-10	EREBP1	CAC83122.1 ethylene responsive protein [Oryza sativa]	-	-	-	-	GO:0005634//nucleus	GO:0003700//transcription factor activity, sequence-specific DNA binding	GO:0006338//chromatin remodeling;GO:0006355//regulation of transcription, DNA-templated;GO:0043486//histone exchange
State 1,2 -vs- State 1,3	SK1G00047456	2	8.02215759720269e-17	3.26392e-15	RAP2-3	EEC74639.1 hypothetical protein OsI_10277 [Oryza sativa Indica Group]	-	-	-	-	-	GO:0003700//transcription factor activity, sequence-specific DNA binding	GO:0006355//regulation of transcription, DNA-templated
State 1,2 -vs- State 1,3	SK1G00047479	2	1.18930537127293e-10	3.08023e-09	--	EEC74649.1 hypothetical protein OsI_10299 [Oryza sativa Indica Group]	-	-	-	-	GO:0005576//extracellular region	GO:0005184//neuropeptide hormone activity	GO:0007218//neuropeptide signaling pathway
State 1,2 -vs- State 1,3	SK1G00047489	1	1.4400004465016e-42	1.65459e-40	--	KAB8090558.1 hypothetical protein EE612_015756 [Oryza sativa]	-	-	-	-	-	-	-
State 1,2 -vs- State 1,3	SK1G00047495	3	3.44656861534953e-15	1.25467e-13	Os03g0188200	XP_015627803.1 E3 ubiquitin-protein ligase Os03g0188200 [Oryza sativa Japonica Group]	-	-	-	-	GO:0000109//nucleotide-excision repair complex;GO:0005680//anaphase-promoting complex	GO:0004564//beta-fructofuranosidase activity;GO:0004575//sucrose alpha-glucosidase activity;GO:0008270//zinc ion binding;GO:0046872//metal ion binding;GO:0061630//ubiquitin protein ligase activity;GO:0097602//cullin family protein binding	GO:0006289//nucleotide-excision repair;GO:0031145//anaphase-promoting complex-dependent proteasomal ubiquitin-dependent protein catabolic process
State 1,2 -vs- State 1,3	SK1G00047497	3	7.78848917405678e-55	1.27194e-52	--	-	-	-	-	-	-	-	-
State 1,2 -vs- State 1,3	SK1G00047500	5	7.33807380997749e-18	3.19175e-16	--	XP_015628736.1 uncharacterized protein LOC4331891 [Oryza sativa Japonica Group]	-	-	-	-	-	-	-
State 1,2 -vs- State 1,3	SK1G00047506	2	1.0237905739968e-08	2.21696e-07	--	EAY88855.1 hypothetical protein OsI_10329 [Oryza sativa Indica Group]	-	-	-	-	-	GO:0005515//protein binding	-
State 1,2 -vs- State 1,3	SK1G00047549	4	3.95338284790125e-11	1.06617e-09	MO2	EEC74541.1 hypothetical protein OsI_10065 [Oryza sativa Indica Group]	-	-	-	-	GO:0009331//glycerol-3-phosphate dehydrogenase complex;GO:0016021//integral component of membrane	GO:0003824//catalytic activity;GO:0004368//glycerol-3-phosphate dehydrogenase activity;GO:0004506//squalene monooxygenase activity;GO:0004791//thioredoxin-disulfide reductase activity;GO:0015036//disulfide oxidoreductase activity;GO:0016166//phytoene dehydrogenase activity;GO:0016491//oxidoreductase activity;GO:0016647//oxidoreductase activity, acting on the CH-NH group of donors, oxygen as accep…	GO:0006071//glycerol metabolic process;GO:0006744//ubiquinone biosynthetic process;GO:0006790//sulfur compound metabolic process;GO:0009228//thiamine biosynthetic process;GO:0015995//chlorophyll biosynthetic process;GO:0016117//carotenoid biosynthetic process;GO:0018874//benzoate metabolic process;GO:0030494//bacteriochlorophyll biosynthetic process;GO:0055114//oxidation-reduction process
State 1,2 -vs- State 1,3	SK1G00047551	5	1.02733706931383e-13	3.31558e-12	RPS9C	XP_015616973.1 40S ribosomal protein S9-2 [Oryza sativa Japonica Group]	Genetic Information Processing	Translation	ko03010//Ribosome	K02997	GO:0000314//organellar small ribosomal subunit;GO:0022627//cytosolic small ribosomal subunit	GO:0003723//RNA binding;GO:0003735//structural constituent of ribosome;GO:0019843//rRNA binding	GO:0006412//translation
State 1,2 -vs- State 1,3	SK1G00047574	5	3.84030124656527e-29	2.97729e-27	ECT2	XP_015629859.1 uncharacterized protein LOC4331683 isoform X1 [Oryza sativa Japonica Group]	-	-	-	-	-	GO:0003723//RNA binding	-
State 1,2 -vs- State 1,3	SK1G00047641	2	1.17278403330722e-96	4.81046e-94	MFSD12	EAY88695.1 hypothetical protein OsI_10171 [Oryza sativa Indica Group]	-	-	-	-	GO:0016021//integral component of membrane	GO:0015486//glycoside-pentoside-hexuronide:cation symporter activity;GO:0022857//transmembrane transporter activity	GO:0006812//cation transport;GO:0008643//carbohydrate transport;GO:0055085//transmembrane transport
State 1,2 -vs- State 1,3	SK1G00047651	2	5.22231166996749e-10	1.27574e-08	RPE	XP_015630737.1 ribulose-phosphate 3-epimerase, chloroplastic [Oryza sativa Japonica Group]	Metabolism;Metabolism;Metabolism;Metabolism;Metabolism;Metabolism;Metabolism	Global and overview maps;Global and overview maps;Global and overview maps;Global and overview maps;Energy metabolism;Carbohydrate metabolism;Carbohydrate metabolism	ko01100//Metabolic pathways;ko01110//Biosynthesis of secondary metabolites;ko01200//Carbon metabolism;ko01230//Biosynthesis of amino acids;ko00710//Carbon fixation in photosynthetic organisms;ko00040//Pentose and glucuronate interconversions;ko00030//Pentose phosphate pathway	K01783;K01783;K01783;K01783;K01783;K01783;K01783	GO:0005576//extracellular region	GO:0003824//catalytic activity;GO:0003938//IMP dehydrogenase activity;GO:0004514//nicotinate-nucleotide diphosphorylase (carboxylating) activity;GO:0004750//ribulose-phosphate 3-epimerase activity;GO:0004789//thiamine-phosphate diphosphorylase activity;GO:0016857//racemase and epimerase activity, acting on carbohydrates and derivatives;GO:0047465//N-acylglucosamine-6-phosphate 2-epimerase activity	GO:0000105//histidine biosynthetic process;GO:0005975//carbohydrate metabolic process;GO:0006051//N-acetylmannosamine metabolic process;GO:0006098//pentose-phosphate shunt;GO:0007339//binding of sperm to zona pellucida;GO:0009152//purine ribonucleotide biosynthetic process;GO:0009228//thiamine biosynthetic process;GO:0009435//NAD biosynthetic process;GO:0055114//oxidation-reduction process
State 1,2 -vs- State 1,3	SK1G00047657	2	3.91249958823859e-12	1.13405e-10	CDF2	XP_015631794.1 cyclic dof factor 1 [Oryza sativa Japonica Group]	-	-	-	-	-	GO:0003677//DNA binding	GO:0006355//regulation of transcription, DNA-templated
State 1,2 -vs- State 1,3	SK1G00047666	4	5.15988349844132e-27	3.64759e-25	OsI_09857	XP_015629749.1 catalase-1 [Oryza sativa Japonica Group]	Metabolism;Metabolism;Metabolism;Environmental Information Processing;Cellular Processes;Metabolism;Metabolism	Global and overview maps;Global and overview maps;Global and overview maps;Signal transduction;Transport and catabolism;Carbohydrate metabolism;Amino acid metabolism	ko01100//Metabolic pathways;ko01110//Biosynthesis of secondary metabolites;ko01200//Carbon metabolism;ko04016//MAPK signaling pathway - plant;ko04146//Peroxisome;ko00630//Glyoxylate and dicarboxylate metabolism;ko00380//Tryptophan metabolism	K03781;K03781;K03781;K03781;K03781;K03781;K03781	-	GO:0004096//catalase activity;GO:0020037//heme binding	GO:0055114//oxidation-reduction process
State 1,2 -vs- State 1,3	SK1G00047674	5	5.46653361543296e-27	3.85664e-25	EXLA1	XP_015628071.1 expansin-like A1 [Oryza sativa Japonica Group]	-	-	-	-	-	-	-
State 1,2 -vs- State 1,3	SK1G00047684	3	7.33652745018772e-33	6.4699e-31	CEBIP	Q8H8C7.1 RecName: Full=Chitin elicitor-binding protein; Short=CEBiP; Short=OsCEBiP; AltName: Full=Lysin motif-containing protein 1; Short=Os-LYP1; Flags: Precursor [Oryza sativa Japonica Group]	Organismal Systems	Environmental adaptation	ko04626//Plant-pathogen interaction	K13473	-	GO:0003674//molecular_function	GO:0030436//asexual sporulation
State 1,2 -vs- State 1,3	SK1G00047706	4	9.07853135199174e-12	2.56813e-10	Os08g0191100	EEC74472.1 hypothetical protein OsI_09921 [Oryza sativa Indica Group]	Metabolism;Metabolism;Metabolism;Metabolism;Metabolism;Metabolism;Metabolism	Global and overview maps;Global and overview maps;Global and overview maps;Global and overview maps;Carbohydrate metabolism;Carbohydrate metabolism;Global and overview maps	ko01100//Metabolic pathways;ko01110//Biosynthesis of secondary metabolites;ko01200//Carbon metabolism;ko01230//Biosynthesis of amino acids;ko00630//Glyoxylate and dicarboxylate metabolism;ko00020//Citrate cycle (TCA cycle);ko01210//2-Oxocarboxylic acid metabolism	K01681;K01681;K01681;K01681;K01681;K01681;K01681	GO:0009316//3-isopropylmalate dehydratase complex	GO:0003861//3-isopropylmalate dehydratase activity;GO:0003994//aconitate hydratase activity;GO:0004409//homoaconitate hydratase activity;GO:0047456//2-methylisocitrate dehydratase activity	GO:0006099//tricarboxylic acid cycle;GO:0009085//lysine biosynthetic process;GO:0009098//leucine biosynthetic process;GO:0019629//propionate catabolic process, 2-methylcitrate cycle
State 1,2 -vs- State 1,3	SK1G00047735	5	5.28885493695956e-09	1.17855e-07	--	EAY88482.1 hypothetical protein OsI_09953 [Oryza sativa Indica Group]	-	-	-	-	-	GO:0005515//protein binding	-
State 1,2 -vs- State 1,3	SK1G00047743	4	4.08411580493586e-20	2.03485e-18	WAV3	XP_015627812.1 E3 ubiquitin-protein ligase WAV3 [Oryza sativa Japonica Group]	-	-	-	-	GO:0005680//anaphase-promoting complex;GO:0010007//magnesium chelatase complex	GO:0008270//zinc ion binding;GO:0016851//magnesium chelatase activity;GO:0016887//ATPase activity;GO:0046872//metal ion binding;GO:0061630//ubiquitin protein ligase activity;GO:0097602//cullin family protein binding	GO:0015995//chlorophyll biosynthetic process;GO:0031145//anaphase-promoting complex-dependent proteasomal ubiquitin-dependent protein catabolic process
State 1,2 -vs- State 1,3	SK1G00047770	1	1.89817198439378e-08	4.01186e-07	RZPF34	XP_015628710.1 E3 ubiquitin-protein ligase RZFP34 isoform X1 [Oryza sativa Japonica Group]	Genetic Information Processing	Folding, sorting and degradation	ko04120//Ubiquitin mediated proteolysis	K10144	-	GO:0008270//zinc ion binding	-
State 1,2 -vs- State 1,3	SK1G00047772	3	5.36258887252364e-22	2.95571e-20	TIP1-1	XP_015631095.1 probable aquaporin TIP1-1 [Oryza sativa Japonica Group]	-	-	-	-	GO:0016020//membrane	GO:0015267//channel activity	GO:0055085//transmembrane transport
State 1,2 -vs- State 1,3	SK1G00047781	3	8.89370777050296e-11	2.3308e-09	LSI2	XP_015630657.1 silicon efflux transporter LSI2-like isoform X1 [Oryza sativa Japonica Group]	-	-	-	-	GO:0005664//nuclear origin of replication recognition complex;GO:0005887//integral component of plasma membrane;GO:0016021//integral component of membrane	GO:0003677//DNA binding;GO:0008509//anion transmembrane transporter activity;GO:0015105//arsenite transmembrane transporter activity;GO:0015385//sodium:proton antiporter activity	GO:0006260//DNA replication;GO:0006814//sodium ion transport;GO:0006818//hydrogen transport;GO:0006820//anion transport;GO:0015700//arsenite transport;GO:0046685//response to arsenic-containing substance;GO:0055085//transmembrane transport
State 1,2 -vs- State 1,3	SK1G00047790	5	1.34528979772454e-08	2.88306e-07	--	ACT78555.1 HRL protein [Oryza sativa Japonica Group]	-	-	-	-	-	-	-
State 1,2 -vs- State 1,3	SK1G00047794	5	1.89967620914258e-09	4.44665e-08	mfsd5	EAY88269.1 hypothetical protein OsI_09722 [Oryza sativa Indica Group]	-	-	-	-	GO:0005887//integral component of plasma membrane;GO:0016021//integral component of membrane	GO:0015098//molybdate ion transmembrane transporter activity;GO:0015295//solute:proton symporter activity;GO:0022857//transmembrane transporter activity;GO:0042910//xenobiotic transporter activity	GO:0006810//transport;GO:0015689//molybdate ion transport;GO:0042908//xenobiotic transport;GO:0055085//transmembrane transport
State 1,2 -vs- State 1,3	SK1G00047804	2	2.34307016140514e-13	7.37962e-12	--	XP_015632654.1 uncharacterized protein LOC9267662 isoform X1 [Oryza sativa Japonica Group]	-	-	-	-	-	GO:0003674//molecular_function;GO:0047570//3-oxoadipate enol-lactonase activity;GO:0070205//2-succinyl-6-hydroxy-2,4-cyclohexadiene-1-carboxylate synthase activity	GO:0009234//menaquinone biosynthetic process;GO:0015979//photosynthesis;GO:0042952//beta-ketoadipate pathway
State 1,2 -vs- State 1,3	SK1G00047806	5	6.03545405585367e-89	2.17246e-86	RBL2	XP_015631615.1 RHOMBOID-like protein 2 [Oryza sativa Japonica Group]	-	-	-	-	GO:0005887//integral component of plasma membrane;GO:0016021//integral component of membrane	GO:0004252//serine-type endopeptidase activity	GO:0006464//cellular protein modification process;GO:0019538//protein metabolic process
State 1,2 -vs- State 1,3	SK1G00047831	5	2.85401342090458e-14	9.62479e-13	At1g07660	XP_016507811.1 PREDICTED: uncharacterized protein LOC107825453 [Nicotiana tabacum]	-	-	-	-	GO:0071821//FANCM-MHF complex	GO:0003677//DNA binding	GO:0006352//DNA-templated transcription, initiation
State 1,2 -vs- State 1,3	SK1G00047842	5	1.24457297901404e-11	3.48431e-10	GSVIVT00037159001	XP_015632445.1 peroxidase 5 [Oryza sativa Japonica Group]	Metabolism;Metabolism;Metabolism	Global and overview maps;Global and overview maps;Biosynthesis of other secondary metabolites	ko01100//Metabolic pathways;ko01110//Biosynthesis of secondary metabolites;ko00940//Phenylpropanoid biosynthesis	K00430;K00430;K00430	-	GO:0004601//peroxidase activity;GO:0020037//heme binding	GO:0006979//response to oxidative stress;GO:0055114//oxidation-reduction process
State 1,2 -vs- State 1,3	SK1G00047852	1	1.70761182508187e-90	6.40809e-88	--	AAK63886.1 Putative mudrA protein - maize transposon MuDR [Oryza sativa]	-	-	-	-	-	GO:0003677//DNA binding;GO:0004803//transposase activity;GO:0008270//zinc ion binding	GO:0006313//transposition, DNA-mediated
State 1,2 -vs- State 1,3	SK1G00047869	4	1.09850599687549e-173	9.01158e-171	RPL5	XP_015627856.1 50S ribosomal protein L5, chloroplastic [Oryza sativa Japonica Group]	Genetic Information Processing	Translation	ko03010//Ribosome	K02931	-	-	-
State 1,2 -vs- State 1,3	SK1G00047877	2	1.01705137929107e-37	1.02212e-35	PAT1	KAB8089989.1 hypothetical protein EE612_015043 [Oryza sativa]	Metabolism;Metabolism;Metabolism;Metabolism	Global and overview maps;Global and overview maps;Global and overview maps;Amino acid metabolism	ko01100//Metabolic pathways;ko01110//Biosynthesis of secondary metabolites;ko01230//Biosynthesis of amino acids;ko00400//Phenylalanine, tyrosine and tryptophan biosynthesis	K00766;K00766;K00766;K00766	-	GO:0004048//anthranilate phosphoribosyltransferase activity;GO:0016154//pyrimidine-nucleoside phosphorylase activity;GO:0016757//transferase activity, transferring glycosyl groups	GO:0000162//tryptophan biosynthetic process;GO:0006213//pyrimidine nucleoside metabolic process
State 1,2 -vs- State 1,3	SK1G00047899	4	8.37575320987152e-09	1.83285e-07	--	EAY88370.1 hypothetical protein OsI_09827 [Oryza sativa Indica Group]	-	-	-	-	-	-	-
State 1,2 -vs- State 1,3	SK1G00047954	4	7.31969652215643e-43	8.4935e-41	AZI1	XP_015632237.1 cortical cell-delineating protein [Oryza sativa Japonica Group]	-	-	-	-	-	-	-
State 1,2 -vs- State 1,3	SK1G00047955	1	6.92635737129742e-09	1.52896e-07	EARLI1	BAJ08376.1 qLTG3-1 [Oryza sativa Indica Group]	-	-	-	-	-	-	-
State 1,2 -vs- State 1,3	SK1G00048009	4	4.51600763244292e-19	2.14116e-17	--	XP_015628265.1 uncharacterized protein LOC9267060 [Oryza sativa Japonica Group]	-	-	-	-	-	-	-
State 1,2 -vs- State 1,3	SK1G00048015	2	2.66525393697111e-11	7.27684e-10	HIPP39	EAY88246.1 hypothetical protein OsI_09697 [Oryza sativa Indica Group]	-	-	-	-	GO:0005777//peroxisome;GO:0005951//carbamoyl-phosphate synthase complex;GO:0016021//integral component of membrane	GO:0003677//DNA binding;GO:0003917//DNA topoisomerase type I activity;GO:0004088//carbamoyl-phosphate synthase (glutamine-hydrolyzing) activity;GO:0046872//metal ion binding	GO:0006265//DNA topological change;GO:0009220//pyrimidine ribonucleotide biosynthetic process;GO:0016560//protein import into peroxisome matrix, docking
State 1,2 -vs- State 1,3	SK1G00048017	2	2.89188228586903e-08	5.96208e-07	--	EAY88248.1 hypothetical protein OsI_09700 [Oryza sativa Indica Group]	-	-	-	-	-	-	-
State 1,2 -vs- State 1,3	SK1G00048034	3	1.263258380486e-10	3.26457e-09	--	XP_015629435.1 uncharacterized protein LOC4331383 [Oryza sativa Japonica Group]	-	-	-	-	-	-	-
State 1,2 -vs- State 1,3	SK1G00048095	3	6.7182548932041e-19	3.16404e-17	--	XP_015623617.1 uncharacterized protein LOC4331205 [Oryza sativa Japonica Group]	-	-	-	-	-	-	-
State 1,2 -vs- State 1,3	SK1G00048096	1	6.1620711118313e-25	3.90948e-23	AHL11	XP_015627505.1 AT-hook motif nuclear-localized protein 9 [Oryza sativa Japonica Group]	-	-	-	-	-	GO:0003677//DNA binding	-
State 1,2 -vs- State 1,3	SK1G00048097	1	3.74786707530957e-16	1.44804e-14	CYP714C3	EAY88082.1 hypothetical protein OsI_09512 [Oryza sativa Indica Group]	-	-	-	-	-	GO:0005506//iron ion binding;GO:0016705//oxidoreductase activity, acting on paired donors, with incorporation or reduction of molecular oxygen;GO:0020037//heme binding	GO:0055114//oxidation-reduction process
State 1,2 -vs- State 1,3	SK1G00048106	2	6.4220936969677e-57	1.10507e-54	PIP1-3	XP_015625572.1 aquaporin PIP 1-3 [Oryza sativa Japonica Group]	-	-	-	-	GO:0016020//membrane	GO:0015267//channel activity	GO:0055085//transmembrane transport
State 1,2 -vs- State 1,3	SK1G00048110	4	1.05174738713889e-19	5.16e-18	RPL9	EAY88068.1 hypothetical protein OsI_09498 [Oryza sativa Indica Group]	Genetic Information Processing	Translation	ko03010//Ribosome	K02939	GO:0000311//plastid large ribosomal subunit;GO:0022625//cytosolic large ribosomal subunit	GO:0003735//structural constituent of ribosome;GO:0016538//cyclin-dependent protein serine/threonine kinase regulator activity	GO:0006412//translation;GO:0044419//interspecies interaction between organisms
State 1,2 -vs- State 1,3	SK1G00048117	1	3.02280682553143e-43	3.54251e-41	ATI1	XP_015627065.1 ATG8-interacting protein 1 isoform X1 [Oryza sativa Japonica Group]	-	-	-	-	-	-	-
State 1,2 -vs- State 1,3	SK1G00048124	1	3.82561267173605e-28	2.82911e-26	BET11	XP_015626198.1 bet1-like SNARE 1-1 isoform X1 [Oryza sativa Japonica Group]	Genetic Information Processing	Folding, sorting and degradation	ko04130//SNARE interactions in vesicular transport	K08504	-	GO:0016779//nucleotidyltransferase activity	-
State 1,2 -vs- State 1,3	SK1G00048132	4	6.25250746267725e-48	8.78714e-46	dnlz	EAY88046.1 hypothetical protein OsI_09474 [Oryza sativa Indica Group]	-	-	-	-	-	GO:0008270//zinc ion binding	-
State 1,2 -vs- State 1,3	SK1G00048133	4	8.63561438909708e-20	4.26044e-18	PCRK1	EEC74260.1 hypothetical protein OsI_09473 [Oryza sativa Indica Group]	-	-	-	-	-	GO:0004672//protein kinase activity;GO:0005524//ATP binding	GO:0006468//protein phosphorylation
State 1,2 -vs- State 1,3	SK1G00048135	2	1.76971485000651e-24	1.10686e-22	LPA1	XP_015625422.1 P-loop NTPase domain-containing protein LPA1 [Oryza sativa Japonica Group]	-	-	-	-	GO:0005887//integral component of plasma membrane;GO:0009898//cytoplasmic side of plasma membrane;GO:0043190//ATP-binding cassette (ABC) transporter complex;GO:0055051//ATP-binding cassette (ABC) transporter complex, integrated substrate binding	GO:0003723//RNA binding;GO:0003724//RNA helicase activity;GO:0003924//GTPase activity;GO:0004020//adenylylsulfate kinase activity;GO:0005524//ATP binding;GO:0005525//GTP binding;GO:0015413//nickel-transporting ATPase activity;GO:0016301//kinase activity;GO:0019001//guanyl nucleotide binding;GO:0031683//G-protein beta/gamma-subunit complex binding;GO:0033230//cysteine-transporting ATPase activity;…	GO:0006790//sulfur compound metabolic process;GO:0006810//transport;GO:0007186//G-protein coupled receptor signaling pathway;GO:0015675//nickel cation transport;GO:0033228//cysteine export
State 1,2 -vs- State 1,3	SK1G00048155	1	3.61258132968508e-08	7.37464e-07	XI-B	BAD21517.1 putative myosin subfamily XI heavy chain [Oryza sativa Japonica Group]	-	-	-	-	GO:0016459//myosin complex	GO:0000155//phosphorelay sensor kinase activity;GO:0003774//motor activity;GO:0004672//protein kinase activity;GO:0005515//protein binding;GO:0005524//ATP binding	GO:0000160//phosphorelay signal transduction system;GO:0000910//cytokinesis;GO:0006109//regulation of carbohydrate metabolic process;GO:0006810//transport;GO:0007059//chromosome segregation;GO:0030261//chromosome condensation
State 1,2 -vs- State 1,3	SK1G00048174	5	3.5574882812882e-09	8.08052e-08	RPL37B	BAS81554.1 Os02g0815000 [Oryza sativa Japonica Group]	Genetic Information Processing	Translation	ko03010//Ribosome	K02922	GO:0005840//ribosome	GO:0003735//structural constituent of ribosome;GO:0033743//peptide-methionine (R)-S-oxide reductase activity	GO:0006412//translation;GO:0055114//oxidation-reduction process
State 1,2 -vs- State 1,3	SK1G00048183	4	1.04135039597436e-08	2.25222e-07	DESI1	KAB8089469.1 hypothetical protein EE612_014428 [Oryza sativa]	-	-	-	-	-	GO:0008233//peptidase activity	-
State 1,2 -vs- State 1,3	SK1G00048218	5	8.96606265976412e-16	3.40084e-14	WAK2	XP_015623783.1 wall-associated receptor kinase 2 [Oryza sativa Japonica Group]	-	-	-	-	-	GO:0004672//protein kinase activity;GO:0005509//calcium ion binding;GO:0005524//ATP binding;GO:0030247//polysaccharide binding	GO:0006468//protein phosphorylation
State 1,2 -vs- State 1,3	SK1G00048223	2	5.74858835166235e-16	2.20175e-14	Os02g0806900	EAY87933.1 hypothetical protein OsI_09357 [Oryza sativa Indica Group]	Metabolism;Metabolism	Global and overview maps;Lipid metabolism	ko01100//Metabolic pathways;ko00600//Sphingolipid metabolism	K00654;K00654	-	GO:0003824//catalytic activity;GO:0003870//5-aminolevulinate synthase activity;GO:0008710//8-amino-7-oxononanoate synthase activity;GO:0008890//glycine C-acetyltransferase activity;GO:0018826//methionine gamma-lyase activity;GO:0030170//pyridoxal phosphate binding	GO:0006567//threonine catabolic process;GO:0006783//heme biosynthetic process;GO:0009058//biosynthetic process;GO:0009087//methionine catabolic process;GO:0009093//cysteine catabolic process;GO:0009102//biotin biosynthetic process;GO:0019346//transsulfuration
State 1,2 -vs- State 1,3	SK1G00048225	2	5.38926428246964e-11	1.43693e-09	WAV3	EEC74199.1 hypothetical protein OsI_09355 [Oryza sativa Indica Group]	-	-	-	-	GO:0000109//nucleotide-excision repair complex;GO:0005675//holo TFIIH complex;GO:0005680//anaphase-promoting complex	GO:0004693//cyclin-dependent protein serine/threonine kinase activity;GO:0008270//zinc ion binding;GO:0016779//nucleotidyltransferase activity;GO:0046872//metal ion binding;GO:0061630//ubiquitin protein ligase activity;GO:0097602//cullin family protein binding	GO:0006289//nucleotide-excision repair;GO:0006352//DNA-templated transcription, initiation;GO:0009058//biosynthetic process;GO:0031145//anaphase-promoting complex-dependent proteasomal ubiquitin-dependent protein catabolic process
State 1,2 -vs- State 1,3	SK1G00048228	5	4.63746894306453e-18	2.06029e-16	GATA8	XP_015626107.1 GATA transcription factor 11 [Oryza sativa Japonica Group]	-	-	-	-	-	GO:0008270//zinc ion binding;GO:0043565//sequence-specific DNA binding	GO:0006355//regulation of transcription, DNA-templated
State 1,2 -vs- State 1,3	SK1G00048249	4	1.5067049658055e-10	3.86257e-09	At5g35200	EEC74189.1 hypothetical protein OsI_09327 [Oryza sativa Indica Group]	-	-	-	-	-	GO:0005543//phospholipid binding	-
State 1,2 -vs- State 1,3	SK1G00048303	2	1.86962139504798e-12	5.53279e-11	RR23	B8AEH1.1 RecName: Full=Two-component response regulator ORR23 [Oryza sativa Indica Group]	Environmental Information Processing	Signal transduction	ko04075//Plant hormone signal transduction	K14491	GO:0016020//membrane	GO:0000156//phosphorelay response regulator activity;GO:0003677//DNA binding;GO:0003700//transcription factor activity, sequence-specific DNA binding;GO:0004673//protein histidine kinase activity;GO:0005524//ATP binding	GO:0000160//phosphorelay signal transduction system;GO:0006355//regulation of transcription, DNA-templated;GO:0006796//phosphate-containing compound metabolic process;GO:0006808//regulation of nitrogen utilization;GO:0030436//asexual sporulation;GO:0042173//regulation of sporulation resulting in formation of a cellular spore
State 1,2 -vs- State 1,3	SK1G00048332	4	4.28694877354344e-10	1.05602e-08	TIC55	XP_015627610.1 protein TIC 55, chloroplastic [Oryza sativa Japonica Group]	-	-	-	-	-	GO:0010277//chlorophyllide a oxygenase [overall] activity;GO:0016491//oxidoreductase activity;GO:0018618//anthranilate 1,2-dioxygenase (deaminating, decarboxylating) activity;GO:0051537//2 iron, 2 sulfur cluster binding	GO:0006569//tryptophan catabolic process;GO:0055114//oxidation-reduction process
State 1,2 -vs- State 1,3	SK1G00048356	4	6.72527060834152e-12	1.91318e-10	--	-	-	-	-	-	-	-	-
State 1,2 -vs- State 1,3	SK1G00048366	5	1.61289946524326e-15	6.00159e-14	RPL35AA	XP_015627611.1 60S ribosomal protein L35a-1 [Oryza sativa Japonica Group]	Genetic Information Processing	Translation	ko03010//Ribosome	K02917	GO:0005840//ribosome	GO:0003723//RNA binding;GO:0003735//structural constituent of ribosome	GO:0006364//rRNA processing;GO:0006412//translation
State 1,2 -vs- State 1,3	SK1G00048498	4	5.13902141773166e-26	3.47944e-24	MPT3	XP_015626603.1 mitochondrial phosphate carrier protein 3, mitochondrial [Oryza sativa Japonica Group]	-	-	-	-	-	-	-
State 1,2 -vs- State 1,3	SK1G00048500	2	2.27328407270408e-08	4.75623e-07	FLS	XP_015624815.1 flavonol synthase/flavanone 3-hydroxylase [Oryza sativa Japonica Group]	Metabolism;Metabolism;Metabolism	Global and overview maps;Global and overview maps;Biosynthesis of other secondary metabolites	ko01100//Metabolic pathways;ko01110//Biosynthesis of secondary metabolites;ko00941//Flavonoid biosynthesis	K05278;K05278;K05278	-	GO:0016491//oxidoreductase activity	GO:0055114//oxidation-reduction process
State 1,2 -vs- State 1,3	SK1G00048506	3	4.61737611782059e-59	8.52764e-57	BZIP23	AKT95175.1 OsbZIP23 [Oryza sativa f. spontanea]	Environmental Information Processing	Signal transduction	ko04075//Plant hormone signal transduction	K14432	-	-	-
State 1,2 -vs- State 1,3	SK1G00048515	1	1.41431850307277e-14	4.88639e-13	ERF110	XP_015624274.1 ethylene-responsive transcription factor ERF109 [Oryza sativa Japonica Group]	-	-	-	-	-	GO:0003700//transcription factor activity, sequence-specific DNA binding	GO:0006355//regulation of transcription, DNA-templated;GO:0045087//innate immune response
State 1,2 -vs- State 1,3	SK1G00048523	4	2.20253322257682e-09	5.11484e-08	At5g16450	EAY87625.1 hypothetical protein OsI_09036 [Oryza sativa Indica Group]	-	-	-	-	-	GO:0008428//ribonuclease inhibitor activity	GO:0051252//regulation of RNA metabolic process
State 1,2 -vs- State 1,3	SK1G00048527	3	2.80894271619467e-08	5.80126e-07	--	XP_015624914.1 uncharacterized protein LOC4330810 [Oryza sativa Japonica Group]	-	-	-	-	-	-	-
State 1,2 -vs- State 1,3	SK1G00048534	5	8.53233286708538e-21	4.37468e-19	PHOS34	XP_015625371.1 universal stress protein PHOS34 [Oryza sativa Japonica Group]	-	-	-	-	-	-	-
State 1,2 -vs- State 1,3	SK1G00048545	2	3.02024893013864e-12	8.78312e-11	--	EAY87599.1 hypothetical protein OsI_09010 [Oryza sativa Indica Group]	-	-	-	-	-	GO:0009055//electron carrier activity	-
State 1,2 -vs- State 1,3	SK1G00048548	5	6.44458982422432e-18	2.82401e-16	HSP24.1	XP_015626255.1 24.1 kDa heat shock protein, mitochondrial isoform X2 [Oryza sativa Japonica Group]	Genetic Information Processing	Folding, sorting and degradation	ko04141//Protein processing in endoplasmic reticulum	K13993	-	-	-
State 1,2 -vs- State 1,3	SK1G00048550	3	2.60602897350103e-09	5.97799e-08	FBW2	XP_015627547.1 F-box protein FBW2 [Oryza sativa Japonica Group]	-	-	-	-	-	GO:0005515//protein binding	-
State 1,2 -vs- State 1,3	SK1G00048554	5	6.60534448540201e-15	2.35595e-13	PHI-1	KAF3793729.1 EXORDIUM-like 4 protein [Nymphaea thermarum]	-	-	-	-	GO:0012506//vesicle membrane	GO:0005198//structural molecule activity	-
State 1,2 -vs- State 1,3	SK1G00048557	2	4.88240044450897e-12	1.40479e-10	UGT85A24	EAY87581.1 hypothetical protein OsI_08991 [Oryza sativa Indica Group]	-	-	-	-	-	GO:0008194//UDP-glycosyltransferase activity;GO:0016758//transferase activity, transferring hexosyl groups	-
State 1,2 -vs- State 1,3	SK1G00048562	2	1.04388601255495e-09	2.48637e-08	APRL3	EAY87573.1 hypothetical protein OsI_08985 [Oryza sativa Indica Group]	-	-	-	-	GO:0005737//cytoplasm	GO:0003756//protein disulfide isomerase activity;GO:0015036//disulfide oxidoreductase activity	GO:0006457//protein folding;GO:0055114//oxidation-reduction process
State 1,2 -vs- State 1,3	SK1G00048568	4	8.22068593472304e-16	3.12484e-14	RPL29	EAY87568.1 hypothetical protein OsI_08980 [Oryza sativa Indica Group]	Genetic Information Processing	Translation	ko03010//Ribosome	K02904	GO:0000315//organellar large ribosomal subunit;GO:0005840//ribosome;GO:0022625//cytosolic large ribosomal subunit	GO:0003735//structural constituent of ribosome	GO:0006412//translation
State 1,2 -vs- State 1,3	SK1G00048572	3	1.38828317864796e-54	2.23615e-52	ANNAT7	ADE61246.1 annexin 2 [Oryza sativa Indica Group]	-	-	-	-	-	GO:0005509//calcium ion binding;GO:0005544//calcium-dependent phospholipid binding	-
State 1,2 -vs- State 1,3	SK1G00048573	4	5.17921698866538e-09	1.15704e-07	--	EAY87563.1 hypothetical protein OsI_08975 [Oryza sativa Indica Group]	-	-	-	-	-	-	-
State 1,2 -vs- State 1,3	SK1G00048588	1	1.97996192338234e-24	1.23616e-22	SPCC23B6.04c	XP_015627594.1 phosphatidylinositol transfer protein 3 [Oryza sativa Japonica Group]	-	-	-	-	-	GO:0003677//DNA binding;GO:0003700//transcription factor activity, sequence-specific DNA binding;GO:0003968//RNA-directed RNA polymerase activity;GO:0016987//sigma factor activity	GO:0006352//DNA-templated transcription, initiation;GO:0006355//regulation of transcription, DNA-templated;GO:0019083//viral transcription
State 1,2 -vs- State 1,3	SK1G00048590	2	4.5550227730026e-51	6.92579e-49	gpmA	XP_015623414.1 uncharacterized protein LOC4330747 [Oryza sativa Japonica Group]	Metabolism;Metabolism;Metabolism;Metabolism;Metabolism;Metabolism	Global and overview maps;Global and overview maps;Global and overview maps;Global and overview maps;Carbohydrate metabolism;Amino acid metabolism	ko01100//Metabolic pathways;ko01110//Biosynthesis of secondary metabolites;ko01200//Carbon metabolism;ko01230//Biosynthesis of amino acids;ko00010//Glycolysis / Gluconeogenesis;ko00260//Glycine, serine and threonine metabolism	K01834;K01834;K01834;K01834;K01834;K01834	-	GO:0008969//phosphohistidine phosphatase activity	GO:0000160//phosphorelay signal transduction system;GO:0009236//cobalamin biosynthetic process
State 1,2 -vs- State 1,3	SK1G00048599	2	1.00622770411363e-14	3.5283e-13	LAC9	XP_015624249.1 putative laccase-9 [Oryza sativa Japonica Group]	-	-	-	-	-	GO:0005375//copper ion transmembrane transporter activity;GO:0005507//copper ion binding;GO:0016491//oxidoreductase activity	GO:0006825//copper ion transport;GO:0055114//oxidation-reduction process
State 1,2 -vs- State 1,3	SK1G00048601	2	1.61391096757335e-19	7.85251e-18	SK1	XP_015626759.1 shikimate kinase 1, chloroplastic [Oryza sativa Japonica Group]	Metabolism;Metabolism;Metabolism;Metabolism	Global and overview maps;Global and overview maps;Global and overview maps;Amino acid metabolism	ko01100//Metabolic pathways;ko01110//Biosynthesis of secondary metabolites;ko01230//Biosynthesis of amino acids;ko00400//Phenylalanine, tyrosine and tryptophan biosynthesis	K00891;K00891;K00891;K00891	GO:0005575//cellular_component;GO:0005737//cytoplasm;GO:0009898//cytoplasmic side of plasma membrane;GO:0043190//ATP-binding cassette (ABC) transporter complex;GO:0055052//ATP-binding cassette (ABC) transporter complex, substrate-binding subunit-containing	GO:0003896//DNA primase activity;GO:0004127//cytidylate kinase activity;GO:0004140//dephospho-CoA kinase activity;GO:0005524//ATP binding;GO:0015413//nickel-transporting ATPase activity;GO:0015614//D-xylose-importing ATPase activity;GO:0016887//ATPase activity	GO:0006139//nucleobase-containing compound metabolic process;GO:0006260//DNA replication;GO:0006400//tRNA modification;GO:0008150//biological_process;GO:0015675//nickel cation transport;GO:0015753//D-xylose transport;GO:0015937//coenzyme A biosynthetic process;GO:0015949//nucleobase-containing small molecule interconversion
State 1,2 -vs- State 1,3	SK1G00048663	1	1.29822849955321e-43	1.54713e-41	--	EEC73975.1 hypothetical protein OsI_08879 [Oryza sativa Indica Group]	-	-	-	-	GO:0000276//mitochondrial proton-transporting ATP synthase complex, coupling factor F(o);GO:0045263//proton-transporting ATP synthase complex, coupling factor F(o);GO:0045264//plasma membrane proton-transporting ATP synthase complex, coupling factor F(o)	GO:0046933//proton-transporting ATP synthase activity, rotational mechanism	GO:0015986//ATP synthesis coupled proton transport
State 1,2 -vs- State 1,3	SK1G00048665	2	2.04818465236056e-24	1.2765e-22	At5g55050	XP_015623832.1 GDSL esterase/lipase At1g71250 [Oryza sativa Japonica Group]	-	-	-	-	-	GO:0016788//hydrolase activity, acting on ester bonds	-
State 1,2 -vs- State 1,3	SK1G00048672	5	1.29208231895436e-10	3.33662e-09	GATL9	EAZ24557.1 hypothetical protein OsJ_08319 [Oryza sativa Japonica Group]	-	-	-	-	-	GO:0016757//transferase activity, transferring glycosyl groups	-
State 1,2 -vs- State 1,3	SK1G00048673	4	2.15925876067462e-20	1.08811e-18	FH16	XP_015625870.1 formin-like protein 16 [Oryza sativa Japonica Group]	-	-	-	-	-	-	GO:0006260//DNA replication
State 1,2 -vs- State 1,3	SK1G00048681	4	1.53973728023389e-13	4.90643e-12	PUB21	XP_015623806.1 U-box domain-containing protein 21 [Oryza sativa Japonica Group]	-	-	-	-	-	GO:0004842//ubiquitin-protein transferase activity;GO:0005515//protein binding;GO:0008270//zinc ion binding	GO:0016567//protein ubiquitination
State 1,2 -vs- State 1,3	SK1G00048687	1	3.70796933755996e-27	2.63707e-25	--	KAF2946861.1 hypothetical protein DAI22_02g326100 [Oryza sativa Japonica Group]	-	-	-	-	-	-	-
State 1,2 -vs- State 1,3	SK1G00048703	2	8.89060786706903e-09	1.9371e-07	GLN1-1	XP_015626102.1 glutamine synthetase cytosolic isozyme 1-1 [Oryza sativa Japonica Group]	Metabolism;Metabolism;Metabolism;Metabolism;Metabolism;Metabolism	Global and overview maps;Global and overview maps;Carbohydrate metabolism;Amino acid metabolism;Amino acid metabolism;Energy metabolism	ko01100//Metabolic pathways;ko01230//Biosynthesis of amino acids;ko00630//Glyoxylate and dicarboxylate metabolism;ko00250//Alanine, aspartate and glutamate metabolism;ko00220//Arginine biosynthesis;ko00910//Nitrogen metabolism	K01915;K01915;K01915;K01915;K01915;K01915	-	GO:0004356//glutamate-ammonia ligase activity	GO:0006542//glutamine biosynthetic process;GO:0006807//nitrogen compound metabolic process
State 1,2 -vs- State 1,3	SK1G00048707	4	8.73905794475186e-38	8.80772e-36	PXG5	XP_015625977.1 uncharacterized protein LOC4330644 [Oryza sativa Japonica Group]	Metabolism	Lipid metabolism	ko00073//Cutin, suberine and wax biosynthesis	K17991	-	GO:0005509//calcium ion binding	-
State 1,2 -vs- State 1,3	SK1G00048742	2	1.81188162079714e-15	6.72073e-14	APCB1	EEC73939.1 hypothetical protein OsI_08807 [Oryza sativa Indica Group]	-	-	-	-	-	-	-
State 1,2 -vs- State 1,3	SK1G00048781	4	3.38111356736275e-89	1.24238e-86	NOI4	XP_015624845.1 protein NOI4 [Oryza sativa Japonica Group]	-	-	-	-	-	-	-
State 1,2 -vs- State 1,3	SK1G00048804	1	3.26436983476644e-20	1.63566e-18	LLG1	XP_015622921.1 GPI-anchored protein LLG1 [Oryza sativa Japonica Group]	-	-	-	-	-	-	-
State 1,2 -vs- State 1,3	SK1G00048812	4	4.61615230297617e-29	3.56312e-27	At5g10770	EAY87323.1 hypothetical protein OsI_08727 [Oryza sativa Indica Group]	-	-	-	-	-	-	-
State 1,2 -vs- State 1,3	SK1G00048820	3	1.63805315768402e-106	7.80842e-104	AAMT1	XP_015624979.1 anthranilate O-methyltransferase 1 [Oryza sativa Japonica Group]	-	-	-	-	-	GO:0008168//methyltransferase activity	-
State 1,2 -vs- State 1,3	SK1G00048822	3	1.04701440351865e-18	4.84691e-17	FIM5	EAY87312.1 hypothetical protein OsI_08715 [Oryza sativa Indica Group]	-	-	-	-	-	GO:0005515//protein binding	-
State 1,2 -vs- State 1,3	SK1G00048826	2	3.57652252682914e-10	8.8909e-09	--	-	-	-	-	-	-	-	-
State 1,2 -vs- State 1,3	SK1G00048831	5	6.24354569337945e-18	2.73932e-16	RPL31	KAF0935161.1 hypothetical protein E2562_030442 [Oryza meyeriana var. granulata] [Oryza meyeriana]	Genetic Information Processing	Translation	ko03010//Ribosome	K02910	GO:0005840//ribosome	GO:0003735//structural constituent of ribosome	GO:0006412//translation
State 1,2 -vs- State 1,3	SK1G00048840	1	3.07542008213242e-63	6.30729e-61	DES2	XP_015625626.1 fatty acid desaturase DES2 [Oryza sativa Japonica Group]	Metabolism;Metabolism;Metabolism	Global and overview maps;Global and overview maps;Lipid metabolism	ko01100//Metabolic pathways;ko01212//Fatty acid metabolism;ko01040//Biosynthesis of unsaturated fatty acids	K10256;K10256;K10256	-	GO:0016717//oxidoreductase activity, acting on paired donors, with oxidation of a pair of donors resulting in the reduction of molecular oxygen to two molecules of water	GO:0006629//lipid metabolic process;GO:0055114//oxidation-reduction process
State 1,2 -vs- State 1,3	SK1G00048854	1	9.12786815110383e-10	2.17931e-08	ARP1	XP_015626303.1 RNA-binding protein 24 isoform X4 [Oryza sativa Japonica Group]	-	-	-	-	-	GO:0003676//nucleic acid binding	GO:0008380//RNA splicing
State 1,2 -vs- State 1,3	SK1G00048878	2	6.9728258758643e-11	1.84245e-09	At1g11330	EAY87251.1 hypothetical protein OsI_08653 [Oryza sativa Indica Group]	-	-	-	-	-	GO:0004672//protein kinase activity;GO:0004674//protein serine/threonine kinase activity;GO:0005524//ATP binding	GO:0006468//protein phosphorylation
State 1,2 -vs- State 1,3	SK1G00048880	5	7.76277604584539e-09	1.70506e-07	CRWN1	EAY87248.1 hypothetical protein OsI_08650 [Oryza sativa Indica Group]	-	-	-	-	-	GO:0005524//ATP binding	GO:0007059//chromosome segregation;GO:0030261//chromosome condensation
State 1,2 -vs- State 1,3	SK1G00048921	2	6.9037462472484e-24	4.17003e-22	LPPE2	KAB8088525.1 hypothetical protein EE612_013159 [Oryza sativa]	-	-	-	-	-	-	-
State 1,2 -vs- State 1,3	SK1G00048936	5	2.28892728768879e-16	9.00133e-15	--	XP_015626613.1 trihelix transcription factor GT-3b [Oryza sativa Japonica Group]	-	-	-	-	-	GO:0003677//DNA binding;GO:0003918//DNA topoisomerase type II (ATP-hydrolyzing) activity;GO:0005524//ATP binding	GO:0006265//DNA topological change
State 1,2 -vs- State 1,3	SK1G00048969	2	8.21100536184113e-16	3.12452e-14	TOL1	XP_015626548.1 TOM1-like protein 1 [Oryza sativa Japonica Group]	-	-	-	-	-	-	GO:0006886//intracellular protein transport;GO:0016573//histone acetylation
State 1,2 -vs- State 1,3	SK1G00048976	4	3.67250809953189e-11	9.93464e-10	OPT4	BAD08158.1 putative sexual differentiation process protein isp4 [Oryza sativa Japonica Group]	-	-	-	-	-	GO:0015198//oligopeptide transporter activity	GO:0055085//transmembrane transport
State 1,2 -vs- State 1,3	SK1G00048977	4	4.94716772083849e-14	1.634e-12	--	XP_015624080.1 uncharacterized protein LOC4330398 [Oryza sativa Japonica Group]	-	-	-	-	-	-	-
State 1,2 -vs- State 1,3	SK1G00049035	5	2.47348146851898e-11	6.77423e-10	CPK5	XP_006647698.1 PREDICTED: calcium-dependent protein kinase 26-like [Oryza brachyantha]	Organismal Systems	Environmental adaptation	ko04626//Plant-pathogen interaction	K13412	GO:0005737//cytoplasm	GO:0000166//nucleotide binding;GO:0004672//protein kinase activity;GO:0004812//aminoacyl-tRNA ligase activity;GO:0005509//calcium ion binding;GO:0005515//protein binding;GO:0005524//ATP binding	GO:0006418//tRNA aminoacylation for protein translation;GO:0006468//protein phosphorylation
State 1,2 -vs- State 1,3	SK1G00049062	5	1.9761914577554e-09	4.61046e-08	BRH1	EAY87081.1 hypothetical protein OsI_08479 [Oryza sativa Indica Group]	-	-	-	-	GO:0005680//anaphase-promoting complex	GO:0008270//zinc ion binding;GO:0046872//metal ion binding;GO:0061630//ubiquitin protein ligase activity;GO:0097602//cullin family protein binding	GO:0031145//anaphase-promoting complex-dependent proteasomal ubiquitin-dependent protein catabolic process
State 1,2 -vs- State 1,3	SK1G00049068	2	3.69202974963953e-16	1.42803e-14	ISPF	XP_015627624.1 2-C-methyl-D-erythritol 2,4-cyclodiphosphate synthase, chloroplastic [Oryza sativa Japonica Group]	Metabolism;Metabolism;Metabolism	Global and overview maps;Global and overview maps;Metabolism of terpenoids and polyketides	ko01100//Metabolic pathways;ko01110//Biosynthesis of secondary metabolites;ko00900//Terpenoid backbone biosynthesis	K01770;K01770;K01770	-	GO:0008685//2-C-methyl-D-erythritol 2,4-cyclodiphosphate synthase activity	GO:0016114//terpenoid biosynthetic process;GO:0019288//isopentenyl diphosphate biosynthetic process, methylerythritol 4-phosphate pathway
State 1,2 -vs- State 1,3	SK1G00049097	4	3.33785290473194e-30	2.69434e-28	ROC5	EEC73771.1 hypothetical protein OsI_08446 [Oryza sativa Indica Group]	-	-	-	-	-	GO:0003677//DNA binding;GO:0008289//lipid binding	GO:0006355//regulation of transcription, DNA-templated;GO:0008360//regulation of cell shape
State 1,2 -vs- State 1,3	SK1G00049121	2	4.74614205835436e-26	3.21962e-24	AVT3C	EAY87023.1 hypothetical protein OsI_08421 [Oryza sativa Indica Group]	-	-	-	-	-	-	-
State 1,2 -vs- State 1,3	SK1G00049123	2	1.54604275884536e-09	3.6455e-08	RALF23	XP_015627026.1 rapid alkalinization factor 23 [Oryza sativa Japonica Group]	-	-	-	-	-	-	-
State 1,2 -vs- State 1,3	SK1G00049131	3	0	0	DHN1	EAY87014.1 hypothetical protein OsI_08410 [Oryza sativa Indica Group]	-	-	-	-	GO:0005634//nucleus	GO:0003677//DNA binding	GO:0006367//transcription initiation from RNA polymerase II promoter;GO:0009415//response to water;GO:0032968//positive regulation of transcription elongation from RNA polymerase II promoter
State 1,2 -vs- State 1,3	SK1G00049137	5	1.24589231284684e-45	1.5866e-43	--	XP_015623419.1 ganglioside-induced differentiation-associated protein 2 [Oryza sativa Japonica Group]	-	-	-	-	-	-	-
State 1,2 -vs- State 1,3	SK1G00049167	3	3.7762186445699e-31	3.19439e-29	GPX6	EAY86982.1 hypothetical protein OsI_08376 [Oryza sativa Indica Group]	Metabolism;Metabolism;Metabolism	Global and overview maps;Metabolism of other amino acids;Lipid metabolism	ko01100//Metabolic pathways;ko00480//Glutathione metabolism;ko00590//Arachidonic acid metabolism	K00432;K00432;K00432	-	GO:0004602//glutathione peroxidase activity;GO:0016209//antioxidant activity;GO:0016491//oxidoreductase activity	GO:0006979//response to oxidative stress;GO:0055114//oxidation-reduction process
State 1,2 -vs- State 1,3	SK1G00049176	4	3.52627633588711e-16	1.36542e-14	EARLI1	TVU28924.1 hypothetical protein EJB05_20462, partial [Eragrostis curvula]	-	-	-	-	-	-	-
State 1,2 -vs- State 1,3	SK1G00049202	2	3.47049700408271e-08	7.10103e-07	--	XP_015626243.1 uncharacterized protein LOC4330206 [Oryza sativa Japonica Group]	-	-	-	-	-	-	-
State 1,2 -vs- State 1,3	SK1G00049203	2	8.67072379760459e-13	2.64585e-11	NAGK	EAY86953.1 hypothetical protein OsI_08341 [Oryza sativa Indica Group]	Metabolism;Metabolism;Metabolism;Metabolism;Metabolism	Global and overview maps;Global and overview maps;Global and overview maps;Global and overview maps;Amino acid metabolism	ko01100//Metabolic pathways;ko01110//Biosynthesis of secondary metabolites;ko01230//Biosynthesis of amino acids;ko01210//2-Oxocarboxylic acid metabolism;ko00220//Arginine biosynthesis	K00930;K00930;K00930;K00930;K00930	-	GO:0003991//acetylglutamate kinase activity;GO:0004042//acetyl-CoA:L-glutamate N-acetyltransferase activity;GO:0004072//aspartate kinase activity;GO:0004349//glutamate 5-kinase activity;GO:0008804//carbamate kinase activity	GO:0006520//cellular amino acid metabolic process;GO:0006561//proline biosynthetic process;GO:0006592//ornithine biosynthetic process;GO:0009089//lysine biosynthetic process via diaminopimelate
State 1,2 -vs- State 1,3	SK1G00049236	4	2.15971890554924e-71	5.56088e-69	At4g17560	CAC39039.1 putative plastid ribosomal protein L19 precursor [Oryza sativa]	Genetic Information Processing	Translation	ko03010//Ribosome	K02884	GO:0000311//plastid large ribosomal subunit;GO:0005840//ribosome;GO:0022625//cytosolic large ribosomal subunit	GO:0003735//structural constituent of ribosome	GO:0006412//translation
State 1,2 -vs- State 1,3	SK1G00049252	2	1.97160489926105e-08	4.14966e-07	CYB5	XP_015625413.1 cytochrome b5 [Oryza sativa Japonica Group]	-	-	-	-	-	-	-
State 1,2 -vs- State 1,3	SK1G00049294	2	2.74543474093094e-13	8.60082e-12	LAF1	EAY86852.1 hypothetical protein OsI_08236 [Oryza sativa Indica Group]	-	-	-	-	-	-	-
State 1,2 -vs- State 1,3	SK1G00049299	3	1.07386586272746e-42	1.23793e-40	MSBP1	EAY86846.1 hypothetical protein OsI_08230 [Oryza sativa Indica Group]	-	-	-	-	-	-	-
State 1,2 -vs- State 1,3	SK1G00049309	4	7.64934691338279e-54	1.2046e-51	CRPK1	EEC73672.1 hypothetical protein OsI_08219 [Oryza sativa Indica Group]	-	-	-	-	-	GO:0004672//protein kinase activity;GO:0005524//ATP binding	GO:0006468//protein phosphorylation
State 1,2 -vs- State 1,3	SK1G00049320	2	1.02904503572401e-10	2.67893e-09	Os02g0637000	XP_015622966.1 putative ripening-related protein 2 [Oryza sativa Japonica Group]	-	-	-	-	-	-	-
State 1,2 -vs- State 1,3	SK1G00049352	1	3.23585242027071e-11	8.77361e-10	--	KAB8088065.1 hypothetical protein EE612_012544 [Oryza sativa]	-	-	-	-	-	GO:0043565//sequence-specific DNA binding	-
State 1,2 -vs- State 1,3	SK1G00049356	3	3.78780799670147e-22	2.10086e-20	GA2OX6	EEC73644.1 hypothetical protein OsI_08165 [Oryza sativa Indica Group]	Metabolism;Metabolism	Global and overview maps;Metabolism of terpenoids and polyketides	ko01110//Biosynthesis of secondary metabolites;ko00904//Diterpenoid biosynthesis	K04125;K04125	-	GO:0016491//oxidoreductase activity	GO:0055114//oxidation-reduction process
State 1,2 -vs- State 1,3	SK1G00049360	5	1.2525326948582e-08	2.68754e-07	CAL1	XP_015624063.1 defensin-like protein CAL1 [Oryza sativa Japonica Group]	-	-	-	-	-	-	-
State 1,2 -vs- State 1,3	SK1G00049368	3	8.6183210567119e-09	1.88126e-07	UXT1	XP_015623780.1 UDP-xylose transporter 1 [Oryza sativa Japonica Group]	-	-	-	-	GO:0000139//Golgi membrane;GO:0016020//membrane;GO:0016021//integral component of membrane	GO:0015165//pyrimidine nucleotide-sugar transmembrane transporter activity	GO:0090481//pyrimidine nucleotide-sugar transmembrane transport
State 1,2 -vs- State 1,3	SK1G00049374	2	3.90815546260295e-09	8.84854e-08	PAL	XP_015625125.1 phenylalanine ammonia-lyase [Oryza sativa Japonica Group]	Metabolism;Metabolism;Metabolism;Metabolism	Global and overview maps;Global and overview maps;Biosynthesis of other secondary metabolites;Amino acid metabolism	ko01100//Metabolic pathways;ko01110//Biosynthesis of secondary metabolites;ko00940//Phenylpropanoid biosynthesis;ko00360//Phenylalanine metabolism	K10775;K10775;K10775;K10775	-	GO:0004397//histidine ammonia-lyase activity;GO:0016841//ammonia-lyase activity;GO:0050368//tyrosine 2,3-aminomutase activity	GO:0006548//histidine catabolic process;GO:0009058//biosynthetic process;GO:0009698//phenylpropanoid metabolic process
State 1,2 -vs- State 1,3	SK1G00049383	4	1.75040312870757e-12	5.19306e-11	IPUT1	EEC73629.1 hypothetical protein OsI_08135 [Oryza sativa Indica Group]	-	-	-	-	GO:0016020//membrane	GO:0004722//protein serine/threonine phosphatase activity;GO:0016757//transferase activity, transferring glycosyl groups	GO:0006486//protein glycosylation;GO:0030436//asexual sporulation
State 1,2 -vs- State 1,3	SK1G00049396	5	5.67913031425779e-11	1.51193e-09	RPL14A	XP_015622875.1 probable 60S ribosomal protein L14 [Oryza sativa Japonica Group]	Genetic Information Processing	Translation	ko03010//Ribosome	K02875	GO:0005840//ribosome	GO:0003735//structural constituent of ribosome	GO:0006412//translation
State 1,2 -vs- State 1,3	SK1G00049404	1	6.39699656944871e-29	4.88429e-27	GL1-4	B8AFI3.1 RecName: Full=Very-long-chain aldehyde decarbonylase GL1-4; AltName: Full=Protein GLOSSY 1-4 [Oryza sativa Indica Group]	Metabolism;Metabolism	Global and overview maps;Lipid metabolism	ko01110//Biosynthesis of secondary metabolites;ko00073//Cutin, suberine and wax biosynthesis	K15404;K15404	-	GO:0005506//iron ion binding;GO:0016491//oxidoreductase activity	GO:0008610//lipid biosynthetic process;GO:0055114//oxidation-reduction process
State 1,2 -vs- State 1,3	SK1G00049422	5	9.88801660116135e-22	5.36615e-20	--	KAB8087971.1 hypothetical protein EE612_012416, partial [Oryza sativa]	-	-	-	-	-	-	-
State 1,2 -vs- State 1,3	SK1G00049464	5	7.11204870167645e-22	3.90775e-20	--	-	-	-	-	-	-	-	-
State 1,2 -vs- State 1,3	SK1G00049470	2	2.85803746660569e-11	7.79113e-10	--	KAF2945837.1 hypothetical protein DAI22_02g246500 [Oryza sativa Japonica Group]	-	-	-	-	-	GO:0005515//protein binding	-
State 1,2 -vs- State 1,3	SK1G00049503	5	8.65254974408051e-18	3.74501e-16	RSZ23	XP_015625856.1 serine/arginine-rich splicing factor RSZ23 isoform X1 [Oryza sativa Japonica Group]	Genetic Information Processing	Transcription	ko03040//Spliceosome	K12896	-	GO:0003676//nucleic acid binding;GO:0008270//zinc ion binding	GO:0008380//RNA splicing
State 1,2 -vs- State 1,3	SK1G00049524	2	8.68948549724583e-18	3.75639e-16	NIC1	XP_015627422.1 nicotinamidase 1 [Oryza sativa Japonica Group]	-	-	-	-	-	-	-
State 1,2 -vs- State 1,3	SK1G00049531	2	7.06826852651979e-09	1.55833e-07	Cht6	XP_015623420.1 chitinase 6 [Oryza sativa Japonica Group]	Metabolism;Metabolism	Global and overview maps;Carbohydrate metabolism	ko01100//Metabolic pathways;ko00520//Amino sugar and nucleotide sugar metabolism	K01183;K01183	-	GO:0004568//chitinase activity;GO:0008061//chitin binding	GO:0006032//chitin catabolic process;GO:0016998//cell wall macromolecule catabolic process
State 1,2 -vs- State 1,3	SK1G00049542	2	4.11544957443285e-10	1.0159e-08	ISPG	XP_015625724.1 4-hydroxy-3-methylbut-2-en-1-yl diphosphate synthase (ferredoxin), chloroplastic [Oryza sativa Japonica Group]	Metabolism;Metabolism;Metabolism	Global and overview maps;Global and overview maps;Metabolism of terpenoids and polyketides	ko01100//Metabolic pathways;ko01110//Biosynthesis of secondary metabolites;ko00900//Terpenoid backbone biosynthesis	K03526;K03526;K03526	GO:0005737//cytoplasm	GO:0046429//4-hydroxy-3-methylbut-2-en-1-yl diphosphate synthase activity	GO:0016114//terpenoid biosynthetic process;GO:0019288//isopentenyl diphosphate biosynthetic process, methylerythritol 4-phosphate pathway;GO:0055114//oxidation-reduction process
State 1,2 -vs- State 1,3	SK1G00049559	1	8.68377765441174e-141	5.47e-138	GAPC3	XP_015625382.1 glyceraldehyde-3-phosphate dehydrogenase 3, cytosolic [Oryza sativa Japonica Group]	Metabolism;Metabolism;Metabolism;Metabolism;Metabolism;Metabolism	Global and overview maps;Global and overview maps;Global and overview maps;Global and overview maps;Carbohydrate metabolism;Energy metabolism	ko01100//Metabolic pathways;ko01110//Biosynthesis of secondary metabolites;ko01200//Carbon metabolism;ko01230//Biosynthesis of amino acids;ko00010//Glycolysis / Gluconeogenesis;ko00710//Carbon fixation in photosynthetic organisms	K00134;K00134;K00134;K00134;K00134;K00134	-	GO:0004073//aspartate-semialdehyde dehydrogenase activity;GO:0004617//phosphoglycerate dehydrogenase activity;GO:0008839//4-hydroxy-tetrahydrodipicolinate reductase;GO:0016620//oxidoreductase activity, acting on the aldehyde or oxo group of donors, NAD or NADP as acceptor;GO:0047850//diaminopimelate dehydrogenase activity;GO:0048001//erythrose-4-phosphate dehydrogenase activity;GO:0050112//inosit…	GO:0006094//gluconeogenesis;GO:0006096//glycolytic process;GO:0006564//L-serine biosynthetic process;GO:0008615//pyridoxine biosynthetic process;GO:0009085//lysine biosynthetic process;GO:0009086//methionine biosynthetic process;GO:0009088//threonine biosynthetic process;GO:0009089//lysine biosynthetic process via diaminopimelate;GO:0009097//isoleucine biosynthetic process;GO:0019310//inositol ca…
State 1,2 -vs- State 1,3	SK1G00049563	2	3.86732099480249e-10	9.58004e-09	G6PDH	EEC73539.1 hypothetical protein OsI_07937 [Oryza sativa Indica Group]	Metabolism;Metabolism;Metabolism;Metabolism;Metabolism	Global and overview maps;Global and overview maps;Global and overview maps;Metabolism of other amino acids;Carbohydrate metabolism	ko01100//Metabolic pathways;ko01110//Biosynthesis of secondary metabolites;ko01200//Carbon metabolism;ko00480//Glutathione metabolism;ko00030//Pentose phosphate pathway	K00036;K00036;K00036;K00036;K00036	-	GO:0004345//glucose-6-phosphate dehydrogenase activity;GO:0016491//oxidoreductase activity;GO:0016614//oxidoreductase activity, acting on CH-OH group of donors;GO:0050661//NADP binding	GO:0006006//glucose metabolic process;GO:0006098//pentose-phosphate shunt;GO:0055114//oxidation-reduction process
State 1,2 -vs- State 1,3	SK1G00049597	4	7.42835877658996e-10	1.78742e-08	STR11	XP_015623850.1 rhodanese-like domain-containing protein 11, chloroplastic [Oryza sativa Japonica Group]	-	-	-	-	-	GO:0003824//catalytic activity;GO:0003968//RNA-directed RNA polymerase activity;GO:0005524//ATP binding	GO:0009228//thiamine biosynthetic process
State 1,2 -vs- State 1,3	SK1G00049600	4	2.98701426092153e-16	1.16299e-14	TUFA	XP_015627061.1 elongation factor Tu, chloroplastic [Oryza sativa Japonica Group]	Organismal Systems	Environmental adaptation	ko04626//Plant-pathogen interaction	K02358	GO:0005737//cytoplasm	GO:0003743//translation initiation factor activity;GO:0003746//translation elongation factor activity;GO:0003747//translation release factor activity;GO:0003924//GTPase activity;GO:0004781//sulfate adenylyltransferase (ATP) activity;GO:0005525//GTP binding;GO:0043022//ribosome binding	GO:0000103//sulfate assimilation;GO:0001514//selenocysteine incorporation;GO:0006412//translation;GO:0006413//translational initiation;GO:0006414//translational elongation;GO:0006415//translational termination;GO:0006950//response to stress;GO:0042254//ribosome biogenesis
State 1,2 -vs- State 1,3	SK1G00049617	3	4.21659324438202e-30	3.3728e-28	JOKA2	XP_015625351.1 protein NBR1 homolog isoform X1 [Oryza sativa Japonica Group]	-	-	-	-	-	GO:0005515//protein binding;GO:0008270//zinc ion binding	-
State 1,2 -vs- State 1,3	SK1G00049626	4	4.54814789528341e-22	2.51073e-20	--	XP_015622942.1 uncharacterized protein LOC4329836 [Oryza sativa Japonica Group]	-	-	-	-	-	-	-
State 1,2 -vs- State 1,3	SK1G00049653	2	6.02868935037713e-16	2.30653e-14	GDPDL3	BAD17453.1 putative GPI-anchored protein [Oryza sativa Japonica Group]	-	-	-	-	-	GO:0008081//phosphoric diester hydrolase activity	GO:0006629//lipid metabolic process
State 1,2 -vs- State 1,3	SK1G00049670	3	6.25469819676834e-12	1.78363e-10	RGA5	EAY86455.1 hypothetical protein OsI_07837 [Oryza sativa Indica Group]	-	-	-	-	-	GO:0046872//metal ion binding	-
State 1,2 -vs- State 1,3	SK1G00049671	3	4.71988529687845e-40	4.95518e-38	PIK-1	EAY86453.1 hypothetical protein OsI_07835 [Oryza sativa Indica Group]	-	-	-	-	GO:0030288//outer membrane-bounded periplasmic space;GO:0031362//anchored component of external side of plasma membrane	GO:0016491//oxidoreductase activity;GO:0016879//ligase activity, forming carbon-nitrogen bonds;GO:0033286//ectoine-transporting ATPase activity;GO:0033288//hydroxyectoine-transporting ATPase activity;GO:0033294//ectoine binding;GO:0033295//hydroxyectoine binding;GO:0046872//metal ion binding	GO:0006400//tRNA modification;GO:0030494//bacteriochlorophyll biosynthetic process;GO:0033308//hydroxyectoine transport;GO:0051470//ectoine transport
State 1,2 -vs- State 1,3	SK1G00049695	4	2.82740885282995e-09	6.45128e-08	--	EAY86429.1 hypothetical protein OsI_07808 [Oryza sativa Indica Group]	-	-	-	-	GO:0030286//dynein complex	-	GO:0007017//microtubule-based process
State 1,2 -vs- State 1,3	SK1G00049704	5	1.78719636937366e-18	8.18745e-17	NAC100	XP_015623389.1 NAC domain-containing protein 92 isoform X1 [Oryza sativa Japonica Group]	-	-	-	-	-	GO:0003677//DNA binding	GO:0006355//regulation of transcription, DNA-templated
State 1,2 -vs- State 1,3	SK1G00049744	2	4.49716362465414e-08	9.065e-07	RIBA2	EAY86376.1 hypothetical protein OsI_07754 [Oryza sativa Indica Group]	Metabolism;Metabolism;Metabolism;Metabolism	Global and overview maps;Global and overview maps;Metabolism of cofactors and vitamins;Metabolism of cofactors and vitamins	ko01100//Metabolic pathways;ko01110//Biosynthesis of secondary metabolites;ko00790//Folate biosynthesis;ko00740//Riboflavin metabolism	K14652;K14652;K14652;K14652	-	GO:0003935//GTP cyclohydrolase II activity;GO:0008686//3,4-dihydroxy-2-butanone-4-phosphate synthase activity	GO:0009231//riboflavin biosynthetic process
State 1,2 -vs- State 1,3	SK1G00049757	2	8.64077815210888e-23	4.95615e-21	KSL7	Q00G37.2 RecName: Full=Ent-cassa-12,15-diene synthase; AltName: Full=Diterpene cyclase 1; Short=OsDTC1; AltName: Full=Ent-kaurene synthase-like 7; Short=OsKSL7 [Oryza sativa Indica Group]	Metabolism;Metabolism	Global and overview maps;Metabolism of terpenoids and polyketides	ko01110//Biosynthesis of secondary metabolites;ko00904//Diterpenoid biosynthesis	K14036;K14036	-	GO:0000287//magnesium ion binding;GO:0010333//terpene synthase activity;GO:0016829//lyase activity	-
State 1,2 -vs- State 1,3	SK1G00049758	2	5.55929975371319e-13	1.70971e-11	CYP76M7	EAY86360.1 hypothetical protein OsI_07739 [Oryza sativa Indica Group]	Metabolism;Metabolism	Global and overview maps;Metabolism of terpenoids and polyketides	ko01110//Biosynthesis of secondary metabolites;ko00904//Diterpenoid biosynthesis	K16084;K16084	-	GO:0005506//iron ion binding;GO:0016705//oxidoreductase activity, acting on paired donors, with incorporation or reduction of molecular oxygen;GO:0020037//heme binding	GO:0055114//oxidation-reduction process
State 1,2 -vs- State 1,3	SK1G00049830	3	1.46805331212832e-08	3.13472e-07	IAN9	EAY86287.1 hypothetical protein OsI_07658 [Oryza sativa Indica Group]	-	-	-	-	GO:0005737//cytoplasm	GO:0003924//GTPase activity;GO:0005525//GTP binding;GO:0008441//3'(2'),5'-bisphosphate nucleotidase activity;GO:0015639//ferrous iron uptake transmembrane transporter activity;GO:0043022//ribosome binding	GO:0006412//translation;GO:0006790//sulfur compound metabolic process;GO:0015684//ferrous iron transport;GO:0042254//ribosome biogenesis
State 1,2 -vs- State 1,3	SK1G00049881	2	2.02409363736276e-19	9.78081e-18	VATP-P1	XP_015622696.1 V-type proton ATPase 16 kDa proteolipid subunit [Oryza sativa Japonica Group]	Metabolism;Metabolism;Cellular Processes	Global and overview maps;Energy metabolism;Transport and catabolism	ko01100//Metabolic pathways;ko00190//Oxidative phosphorylation;ko04145//Phagosome	K02155;K02155;K02155	GO:0016471//vacuolar proton-transporting V-type ATPase complex;GO:0033177//proton-transporting two-sector ATPase complex, proton-transporting domain	GO:0008553//hydrogen-exporting ATPase activity, phosphorylative mechanism;GO:0015078//hydrogen ion transmembrane transporter activity	GO:0015991//ATP hydrolysis coupled proton transport;GO:1902600//hydrogen ion transmembrane transport
State 1,2 -vs- State 1,3	SK1G00049908	2	1.8100973511933e-185	1.63721e-182	--	-	-	-	-	-	-	-	-
State 1,2 -vs- State 1,3	SK1G00049912	1	1.1320973217433e-10	2.93638e-09	--	XP_015627648.1 uncharacterized protein LOC4329598 [Oryza sativa Japonica Group]	-	-	-	-	-	-	-
State 1,2 -vs- State 1,3	SK1G00049917	3	4.07457343471913e-08	8.26038e-07	SDC1	EAY86197.1 hypothetical protein OsI_07573 [Oryza sativa Indica Group]	Metabolism;Metabolism;Metabolism	Global and overview maps;Global and overview maps;Amino acid metabolism	ko01100//Metabolic pathways;ko01110//Biosynthesis of secondary metabolites;ko00340//Histidine metabolism	K01590;K01590;K01590	-	GO:0004351//glutamate decarboxylase activity;GO:0004837//tyrosine decarboxylase activity;GO:0016831//carboxy-lyase activity;GO:0030170//pyridoxal phosphate binding	GO:0006540//glutamate decarboxylation to succinate;GO:0019752//carboxylic acid metabolic process;GO:0051188//cofactor biosynthetic process
State 1,2 -vs- State 1,3	SK1G00049918	3	1.48445109005973e-35	1.41524e-33	--	EAY86196.1 hypothetical protein OsI_07572 [Oryza sativa Indica Group]	-	-	-	-	-	-	-
State 1,2 -vs- State 1,3	SK1G00049935	4	1.4605872671607e-18	6.70862e-17	BAS1	EEC73346.1 hypothetical protein OsI_07554 [Oryza sativa Indica Group]	-	-	-	-	-	GO:0016209//antioxidant activity;GO:0016491//oxidoreductase activity;GO:0051920//peroxiredoxin activity	GO:0006979//response to oxidative stress;GO:0055114//oxidation-reduction process
State 1,2 -vs- State 1,3	SK1G00049957	2	4.62859051305569e-17	1.91411e-15	CIN1	A2X5P7.2 RecName: Full=Beta-fructofuranosidase, insoluble isoenzyme 1; AltName: Full=Cell wall beta-fructosidase 1; AltName: Full=Invertase 1; AltName: Full=OsCIN1; AltName: Full=Sucrose hydrolase 1; Flags: Precursor [Oryza sativa Indica Group]	Metabolism;Metabolism;Metabolism;Metabolism	Global and overview maps;Global and overview maps;Carbohydrate metabolism;Carbohydrate metabolism	ko01100//Metabolic pathways;ko01110//Biosynthesis of secondary metabolites;ko00500//Starch and sucrose metabolism;ko00052//Galactose metabolism	K01193;K01193;K01193;K01193	-	-	-
State 1,2 -vs- State 1,3	SK1G00050000	2	3.71922285744657e-09	8.43159e-08	--	BAS79001.1 Os02g0527650 [Oryza sativa Japonica Group]	-	-	-	-	-	-	-
State 1,2 -vs- State 1,3	SK1G00050010	5	5.90028968169154e-39	6.08575e-37	CLPD1	AAN78327.1 ATP-dependent Clp protease ATP-binding subunit precursor [Oryza sativa Indica Group]	-	-	-	-	GO:0000502//proteasome complex;GO:0005840//ribosome;GO:0009360//DNA polymerase III complex;GO:0009368//endopeptidase Clp complex;GO:0009376//HslUV protease complex;GO:0009379//Holliday junction helicase complex;GO:0033104//type VI protein secretion system complex	GO:0000156//phosphorelay response regulator activity;GO:0003677//DNA binding;GO:0003678//DNA helicase activity;GO:0003688//DNA replication origin binding;GO:0003723//RNA binding;GO:0003724//RNA helicase activity;GO:0003735//structural constituent of ribosome;GO:0003887//DNA-directed DNA polymerase activity;GO:0003924//GTPase activity;GO:0004176//ATP-dependent peptidase activity;GO:0004222//metall…	GO:0002949//tRNA threonylcarbamoyladenosine modification;GO:0006260//DNA replication;GO:0006270//DNA replication initiation;GO:0006275//regulation of DNA replication;GO:0006281//DNA repair;GO:0006310//DNA recombination;GO:0006355//regulation of transcription, DNA-templated;GO:0006412//translation;GO:0006457//protein folding;GO:0006508//proteolysis;GO:0006614//SRP-dependent cotranslational protein…
State 1,2 -vs- State 1,3	SK1G00050012	1	9.13709375472618e-16	3.45827e-14	ACS	EEC73298.1 hypothetical protein OsI_07465 [Oryza sativa Indica Group]	Metabolism;Metabolism;Metabolism;Metabolism;Metabolism;Metabolism;Metabolism	Global and overview maps;Global and overview maps;Global and overview maps;Carbohydrate metabolism;Carbohydrate metabolism;Carbohydrate metabolism;Carbohydrate metabolism	ko01100//Metabolic pathways;ko01110//Biosynthesis of secondary metabolites;ko01200//Carbon metabolism;ko00010//Glycolysis / Gluconeogenesis;ko00620//Pyruvate metabolism;ko00630//Glyoxylate and dicarboxylate metabolism;ko00640//Propanoate metabolism	K01895;K01895;K01895;K01895;K01895;K01895;K01895	-	GO:0003987//acetate-CoA ligase activity;GO:0004043//L-aminoadipate-semialdehyde dehydrogenase activity;GO:0008668//(2,3-dihydroxybenzoyl)adenylate synthase activity;GO:0008756//o-succinylbenzoate-CoA ligase activity;GO:0030729//acetoacetate-CoA ligase activity;GO:0047473//D-alanine-poly(phosphoribitol) ligase activity;GO:0050218//propionate-CoA ligase activity	GO:0009234//menaquinone biosynthetic process;GO:0019287//isopentenyl diphosphate biosynthetic process, mevalonate pathway;GO:0019290//siderophore biosynthetic process;GO:0019350//teichoic acid biosynthetic process;GO:0019427//acetyl-CoA biosynthetic process from acetate;GO:0019878//lysine biosynthetic process via aminoadipic acid
State 1,2 -vs- State 1,3	SK1G00050014	5	1.03725780053628e-08	2.24474e-07	--	-	-	-	-	-	-	-	-
State 1,2 -vs- State 1,3	SK1G00050031	5	4.37693729009361e-08	8.83781e-07	--	BAF08895.1 Os02g0522300 [Oryza sativa Japonica Group]	-	-	-	-	GO:0005680//anaphase-promoting complex	GO:0008270//zinc ion binding;GO:0061630//ubiquitin protein ligase activity;GO:0097602//cullin family protein binding	GO:0031145//anaphase-promoting complex-dependent proteasomal ubiquitin-dependent protein catabolic process
State 1,2 -vs- State 1,3	SK1G00050038	3	1.22874516322876e-10	3.17771e-09	ERF113	EAY86070.1 hypothetical protein OsI_07439 [Oryza sativa Indica Group]	-	-	-	-	-	GO:0003700//transcription factor activity, sequence-specific DNA binding	GO:0006355//regulation of transcription, DNA-templated
State 1,2 -vs- State 1,3	SK1G00050043	1	1.3450263248038e-16	5.39157e-15	NUDT12	EAY86065.1 hypothetical protein OsI_07433 [Oryza sativa Indica Group]	-	-	-	-	-	GO:0016787//hydrolase activity;GO:0017111//nucleoside-triphosphatase activity	GO:0006139//nucleobase-containing compound metabolic process
State 1,2 -vs- State 1,3	SK1G00050057	1	1.95483706940097e-08	4.11683e-07	At3g26670	XP_015627095.1 probable magnesium transporter NIPA8 isoform X1 [Oryza sativa Japonica Group]	-	-	-	-	GO:0016020//membrane;GO:0016021//integral component of membrane	GO:0003677//DNA binding;GO:0015095//magnesium ion transmembrane transporter activity	GO:0006352//DNA-templated transcription, initiation;GO:0015693//magnesium ion transport
State 1,2 -vs- State 1,3	SK1G00050068	1	1.01098760738436e-21	5.47812e-20	PAT1H1	XP_015625828.1 protein PAT1 homolog 1 [Oryza sativa Japonica Group]	Genetic Information Processing	Folding, sorting and degradation	ko03018//RNA degradation	K12617	-	-	-
State 1,2 -vs- State 1,3	SK1G00050076	4	1.28658781767004e-26	8.98701e-25	At2g33490	EAY86037.1 hypothetical protein OsI_07401 [Oryza sativa Indica Group]	-	-	-	-	-	-	-
State 1,2 -vs- State 1,3	SK1G00050113	3	3.348882166926e-14	1.11973e-12	--	XP_015623797.1 uncharacterized protein LOC4329446 [Oryza sativa Japonica Group]	-	-	-	-	-	-	-
State 1,2 -vs- State 1,3	SK1G00050124	4	2.76636660076895e-09	6.32428e-08	--	XP_015623379.1 uncharacterized protein LOC4329439 [Oryza sativa Japonica Group]	-	-	-	-	-	GO:0005515//protein binding;GO:0031072//heat shock protein binding;GO:0051082//unfolded protein binding	GO:0006457//protein folding;GO:0009408//response to heat
State 1,2 -vs- State 1,3	SK1G00050148	5	3.12305579437444e-14	1.0502e-12	RPL35	XP_015627286.1 60S ribosomal protein L35 [Oryza sativa Japonica Group]	Genetic Information Processing	Translation	ko03010//Ribosome	K02918	GO:0000315//organellar large ribosomal subunit;GO:0005840//ribosome;GO:0022625//cytosolic large ribosomal subunit	GO:0003735//structural constituent of ribosome	GO:0006412//translation
State 1,2 -vs- State 1,3	SK1G00050258	5	8.31076518495226e-50	1.23177e-47	RPS15AA	XP_006647300.1 PREDICTED: 40S ribosomal protein S15a-1 [Oryza brachyantha]	Genetic Information Processing	Translation	ko03010//Ribosome	K02957	GO:0005840//ribosome	GO:0003735//structural constituent of ribosome	GO:0006412//translation
State 1,2 -vs- State 1,3	SK1G00050278	4	1.09236287352733e-16	4.39876e-15	At1g65240	EEC73149.1 hypothetical protein OsI_07179 [Oryza sativa Indica Group]	-	-	-	-	-	-	-
State 1,2 -vs- State 1,3	SK1G00050297	2	3.2404722865169e-46	4.21799e-44	CCP1	XP_015624643.1 cysteine proteinase 1 [Oryza sativa Japonica Group]	Organismal Systems	Environmental adaptation	ko04626//Plant-pathogen interaction	K01373	-	GO:0008234//cysteine-type peptidase activity	GO:0006508//proteolysis
State 1,2 -vs- State 1,3	SK1G00050308	2	1.91864696307748e-47	2.64376e-45	CYP73A14	XP_015626579.1 cytochrome P450 CYP73A100 [Oryza sativa Japonica Group]	Metabolism;Metabolism;Metabolism;Metabolism;Metabolism;Metabolism	Global and overview maps;Global and overview maps;Biosynthesis of other secondary metabolites;Biosynthesis of other secondary metabolites;Metabolism of cofactors and vitamins;Biosynthesis of other secondary metabolites	ko01100//Metabolic pathways;ko01110//Biosynthesis of secondary metabolites;ko00940//Phenylpropanoid biosynthesis;ko00941//Flavonoid biosynthesis;ko00130//Ubiquinone and other terpenoid-quinone biosynthesis;ko00945//Stilbenoid, diarylheptanoid and gingerol biosynthesis	K00487;K00487;K00487;K00487;K00487;K00487	-	GO:0005506//iron ion binding;GO:0016705//oxidoreductase activity, acting on paired donors, with incorporation or reduction of molecular oxygen;GO:0020037//heme binding	GO:0055114//oxidation-reduction process
State 1,2 -vs- State 1,3	SK1G00050309	2	9.2557314488097e-26	6.11416e-24	CYP73A14	XP_015623447.1 cytochrome P450 CYP73A100 [Oryza sativa Japonica Group]	Metabolism;Metabolism;Metabolism;Metabolism;Metabolism;Metabolism	Global and overview maps;Global and overview maps;Biosynthesis of other secondary metabolites;Biosynthesis of other secondary metabolites;Metabolism of cofactors and vitamins;Biosynthesis of other secondary metabolites	ko01100//Metabolic pathways;ko01110//Biosynthesis of secondary metabolites;ko00940//Phenylpropanoid biosynthesis;ko00941//Flavonoid biosynthesis;ko00130//Ubiquinone and other terpenoid-quinone biosynthesis;ko00945//Stilbenoid, diarylheptanoid and gingerol biosynthesis	K00487;K00487;K00487;K00487;K00487;K00487	-	GO:0005506//iron ion binding;GO:0016705//oxidoreductase activity, acting on paired donors, with incorporation or reduction of molecular oxygen;GO:0020037//heme binding	GO:0055114//oxidation-reduction process
State 1,2 -vs- State 1,3	SK1G00050337	2	2.35804007088263e-12	6.90863e-11	--	XP_015622666.1 vegetative cell wall protein gp1 isoform X2 [Oryza sativa Japonica Group]	-	-	-	-	-	-	-
State 1,2 -vs- State 1,3	SK1G00050352	1	3.26990004031159e-18	1.46564e-16	Os02g0460200	EAY85756.1 hypothetical protein OsI_07114 [Oryza sativa Indica Group]	-	-	-	-	-	-	-
State 1,2 -vs- State 1,3	SK1G00050423	4	7.94192769711691e-16	3.02539e-14	TLP1	KAF0934118.1 hypothetical protein E2562_022809 [Oryza meyeriana var. granulata] [Oryza meyeriana]	-	-	-	-	-	-	-
State 1,2 -vs- State 1,3	SK1G00050456	1	2.06830951954682e-10	5.26404e-09	--	XP_015627309.1 uncharacterized protein LOC4329219 [Oryza sativa Japonica Group]	Genetic Information Processing;Genetic Information Processing	Folding, sorting and degradation;Folding, sorting and degradation	ko04141//Protein processing in endoplasmic reticulum;ko03060//Protein export	K12275;K12275	GO:0030176//integral component of endoplasmic reticulum membrane	-	GO:0015031//protein transport
State 1,2 -vs- State 1,3	SK1G00050489	3	1.70898864730815e-41	1.87802e-39	OsI_07012	XP_015627601.1 GTPase activating protein 1 [Oryza sativa Japonica Group]	-	-	-	-	-	-	-
State 1,2 -vs- State 1,3	SK1G00050491	4	5.11898353066667e-37	5.04391e-35	BC10	EEC73057.1 hypothetical protein OsI_07014 [Oryza sativa Indica Group]	-	-	-	-	GO:0016020//membrane	GO:0016757//transferase activity, transferring glycosyl groups	-
State 1,2 -vs- State 1,3	SK1G00050500	4	6.80629883894647e-15	2.42517e-13	XAX1	XP_015626765.1 uncharacterized protein LOC4329203 [Oryza sativa Japonica Group]	-	-	-	-	-	-	-
State 1,2 -vs- State 1,3	SK1G00050505	1	1.86620695052521e-11	5.15105e-10	XAT2	XP_015622780.1 uncharacterized protein LOC4329205 [Oryza sativa Japonica Group]	-	-	-	-	-	-	-
State 1,2 -vs- State 1,3	SK1G00050571	4	1.87775450371535e-20	9.50327e-19	AOX1C	EAY85578.1 hypothetical protein OsI_06950 [Oryza sativa Indica Group]	-	-	-	-	-	GO:0004497//monooxygenase activity;GO:0009916//alternative oxidase activity	GO:0006744//ubiquinone biosynthetic process;GO:0055114//oxidation-reduction process
State 1,2 -vs- State 1,3	SK1G00050578	2	1.57482034189627e-12	4.68791e-11	yqjG	EEC73026.1 hypothetical protein OsI_06963 [Oryza sativa Indica Group]	-	-	-	-	-	GO:0005515//protein binding	GO:0006749//glutathione metabolic process
State 1,2 -vs- State 1,3	SK1G00050623	1	2.03654656293649e-16	8.05372e-15	--	EEC72958.1 hypothetical protein OsI_06843 [Oryza sativa Indica Group]	-	-	-	-	-	-	-
State 1,2 -vs- State 1,3	SK1G00050651	3	5.86712504970868e-64	1.25432e-61	SWEET4	XP_015626955.1 bidirectional sugar transporter SWEET4 [Oryza sativa Japonica Group]	-	-	-	-	GO:0016021//integral component of membrane	-	GO:0006488//dolichol-linked oligosaccharide biosynthetic process
State 1,2 -vs- State 1,3	SK1G00050737	5	1.01256511314448e-22	5.77031e-21	RPS3A	XP_015627368.1 40S ribosomal protein S3a-like [Oryza sativa Japonica Group]	Genetic Information Processing	Translation	ko03010//Ribosome	K02984	GO:0005840//ribosome	GO:0003690//double-stranded DNA binding;GO:0003735//structural constituent of ribosome	GO:0006355//regulation of transcription, DNA-templated;GO:0006412//translation
State 1,2 -vs- State 1,3	SK1G00050778	4	1.70374526131605e-20	8.635e-19	RPL21	EAY85268.1 hypothetical protein OsI_06639 [Oryza sativa Indica Group]	Genetic Information Processing	Translation	ko03010//Ribosome	K02888	GO:0000311//plastid large ribosomal subunit;GO:0005840//ribosome;GO:0022625//cytosolic large ribosomal subunit	GO:0003735//structural constituent of ribosome	GO:0006412//translation
State 1,2 -vs- State 1,3	SK1G00050799	2	2.11253546215439e-18	9.60305e-17	RTNLB2	EAY85291.1 hypothetical protein OsI_06662 [Oryza sativa Indica Group]	-	-	-	-	-	-	-
State 1,2 -vs- State 1,3	SK1G00050820	2	4.45551108152706e-46	5.71521e-44	SBT3.9	BAH91622.1 Os02g0270933 [Oryza sativa Japonica Group]	-	-	-	-	-	GO:0008236//serine-type peptidase activity	GO:0006508//proteolysis;GO:0009306//protein secretion
State 1,2 -vs- State 1,3	SK1G00050846	2	2.21833062832898e-47	3.04481e-45	FT1	XP_015625326.1 galactoside 2-alpha-L-fucosyltransferase isoform X1 [Oryza sativa Japonica Group]	-	-	-	-	GO:0016020//membrane	GO:0008107//galactoside 2-alpha-L-fucosyltransferase activity	GO:0042546//cell wall biogenesis
State 1,2 -vs- State 1,3	SK1G00050854	4	7.75506344181284e-153	5.82042e-150	PER70	EAY85148.1 hypothetical protein OsI_06503 [Oryza sativa Indica Group]	Metabolism;Metabolism;Metabolism	Global and overview maps;Global and overview maps;Biosynthesis of other secondary metabolites	ko01100//Metabolic pathways;ko01110//Biosynthesis of secondary metabolites;ko00940//Phenylpropanoid biosynthesis	K00430;K00430;K00430	GO:0016020//membrane	GO:0004601//peroxidase activity;GO:0020037//heme binding	GO:0006979//response to oxidative stress;GO:0055114//oxidation-reduction process
State 1,2 -vs- State 1,3	SK1G00050924	2	3.53117938649273e-48	5.02268e-46	SPMS	XP_015627369.1 spermine synthase [Oryza sativa Japonica Group]	Metabolism;Metabolism;Metabolism;Metabolism	Global and overview maps;Amino acid metabolism;Metabolism of other amino acids;Amino acid metabolism	ko01100//Metabolic pathways;ko00270//Cysteine and methionine metabolism;ko00480//Glutathione metabolism;ko00330//Arginine and proline metabolism	K00797;K00797;K00797;K00797	-	GO:0004766//spermidine synthase activity;GO:0008168//methyltransferase activity;GO:0016645//oxidoreductase activity, acting on the CH-NH group of donors	GO:0008295//spermidine biosynthetic process;GO:0055114//oxidation-reduction process
State 1,2 -vs- State 1,3	SK1G00050963	2	6.81138401627174e-17	2.79061e-15	--	EAY85081.1 hypothetical protein OsI_06437 [Oryza sativa Indica Group]	-	-	-	-	-	-	GO:0006397//mRNA processing
State 1,2 -vs- State 1,3	SK1G00051042	2	1.87521887251237e-12	5.54471e-11	ABCG39	XP_015626248.1 ABC transporter G family member 39 [Oryza sativa Japonica Group]	-	-	-	-	GO:0005575//cellular_component;GO:0005887//integral component of plasma membrane;GO:0009379//Holliday junction helicase complex;GO:0009380//excinuclease repair complex;GO:0009898//cytoplasmic side of plasma membrane;GO:0016020//membrane;GO:0016021//integral component of membrane;GO:0043190//ATP-binding cassette (ABC) transporter complex;GO:0055051//ATP-binding cassette (ABC) transporter complex, …	GO:0000166//nucleotide binding;GO:0003674//molecular_function;GO:0003723//RNA binding;GO:0003724//RNA helicase activity;GO:0003924//GTPase activity;GO:0004386//helicase activity;GO:0005260//channel-conductance-controlling ATPase activity;GO:0005319//lipid transporter activity;GO:0005524//ATP binding;GO:0005525//GTP binding;GO:0008565//protein transporter activity;GO:0009378//four-way junction hel…	GO:0000910//cytokinesis;GO:0006281//DNA repair;GO:0006289//nucleotide-excision repair;GO:0006310//DNA recombination;GO:0006464//cellular protein modification process;GO:0006576//cellular biogenic amine metabolic process;GO:0006810//transport;GO:0006817//phosphate ion transport;GO:0006824//cobalt ion transport;GO:0006855//drug transmembrane transport;GO:0006869//lipid transport;GO:0007601//visual …
State 1,2 -vs- State 1,3	SK1G00051049	5	1.29472579624424e-15	4.85867e-14	--	BAS77587.1 Os02g0209300 [Oryza sativa Japonica Group]	-	-	-	-	-	-	-
State 1,2 -vs- State 1,3	SK1G00051065	2	6.71737550992226e-09	1.48468e-07	--	BAD25114.1 unknown protein [Oryza sativa Japonica Group]	-	-	-	-	-	-	-
State 1,2 -vs- State 1,3	SK1G00051074	3	1.65094894911754e-12	4.90625e-11	NAC048	EEC72740.1 hypothetical protein OsI_06364 [Oryza sativa Indica Group]	-	-	-	-	-	GO:0003677//DNA binding	GO:0006355//regulation of transcription, DNA-templated
State 1,2 -vs- State 1,3	SK1G00051085	2	9.44050086299744e-21	4.83329e-19	--	EAY93355.1 hypothetical protein OsI_15154 [Oryza sativa Indica Group]	-	-	-	-	-	-	-
State 1,2 -vs- State 1,3	SK1G00051089	3	2.30917962979284e-14	7.86258e-13	--	EEC69463.1 hypothetical protein OsI_38658 [Oryza sativa Indica Group]	-	-	-	-	GO:0016020//membrane	-	GO:0015979//photosynthesis
State 1,2 -vs- State 1,3	SK1G00051090	4	4.98857710832338e-18	2.20793e-16	--	EAY83447.1 hypothetical protein OsI_38659 [Oryza sativa Indica Group]	-	-	-	-	-	-	-
State 1,2 -vs- State 1,3	SK1G00051120	5	7.45002552245919e-09	1.6384e-07	--	-	-	-	-	-	-	-	-
State 1,2 -vs- State 1,3	SK1G00051123	4	5.93115833475214e-13	1.82249e-11	--	XP_015622972.1 uncharacterized protein LOC4328759 isoform X2 [Oryza sativa Japonica Group]	-	-	-	-	-	-	-
State 1,2 -vs- State 1,3	SK1G00051136	2	8.24968356618724e-10	1.97695e-08	AVT6A	XP_015625588.1 amino acid transporter AVT6A [Oryza sativa Japonica Group]	-	-	-	-	GO:0005887//integral component of plasma membrane	GO:0015173//aromatic amino acid transmembrane transporter activity	GO:0003333//amino acid transmembrane transport;GO:0015801//aromatic amino acid transport
State 1,2 -vs- State 1,3	SK1G00051150	5	5.39808048194304e-11	1.4382e-09	--	EAY84839.1 hypothetical protein OsI_06204 [Oryza sativa Indica Group]	-	-	-	-	-	-	-
State 1,2 -vs- State 1,3	SK1G00051160	2	5.58505671965882e-10	1.36059e-08	CSY4	AAG28777.1 citrate synthase [Oryza sativa]	Metabolism;Metabolism;Metabolism;Metabolism;Metabolism;Metabolism;Metabolism	Global and overview maps;Global and overview maps;Global and overview maps;Global and overview maps;Carbohydrate metabolism;Carbohydrate metabolism;Global and overview maps	ko01100//Metabolic pathways;ko01110//Biosynthesis of secondary metabolites;ko01200//Carbon metabolism;ko01230//Biosynthesis of amino acids;ko00630//Glyoxylate and dicarboxylate metabolism;ko00020//Citrate cycle (TCA cycle);ko01210//2-Oxocarboxylic acid metabolism	K01647;K01647;K01647;K01647;K01647;K01647;K01647	-	GO:0004108//citrate (Si)-synthase activity;GO:0046912//transferase activity, transferring acyl groups, acyl groups converted into alkyl on transfer	GO:0006099//tricarboxylic acid cycle
State 1,2 -vs- State 1,3	SK1G00051201	2	6.28946537637794e-83	2.05427e-80	AIR3	EAY84890.1 hypothetical protein OsI_06255 [Oryza sativa Indica Group]	-	-	-	-	-	GO:0008236//serine-type peptidase activity	GO:0006508//proteolysis;GO:0009306//protein secretion
State 1,2 -vs- State 1,3	SK1G00051228	5	8.96932020839022e-09	1.95304e-07	At2g34160	XP_015623413.1 uncharacterized protein At2g34160 [Oryza sativa Japonica Group]	-	-	-	-	GO:0005634//nucleus	GO:0003676//nucleic acid binding;GO:0003677//DNA binding;GO:0004526//ribonuclease P activity	GO:0006325//chromatin organization;GO:0008033//tRNA processing
State 1,2 -vs- State 1,3	SK1G00051236	4	2.21112922836342e-16	8.71481e-15	--	XP_015627515.1 transcription initiation factor TFIID subunit 15b isoform X1 [Oryza sativa Japonica Group]	-	-	-	-	-	-	-
State 1,2 -vs- State 1,3	SK1G00051242	2	1.57050765054041e-26	1.09485e-24	CYP734A2	EAY84935.1 hypothetical protein OsI_06302 [Oryza sativa Indica Group]	Metabolism	Metabolism of terpenoids and polyketides	ko00905//Brassinosteroid biosynthesis	K15639	-	GO:0005506//iron ion binding;GO:0016705//oxidoreductase activity, acting on paired donors, with incorporation or reduction of molecular oxygen;GO:0020037//heme binding	GO:0055114//oxidation-reduction process
State 1,2 -vs- State 1,3	SK1G00051248	5	3.74715755622118e-80	1.13949e-77	KCS11	EAY84941.1 hypothetical protein OsI_06307 [Oryza sativa Indica Group]	Metabolism;Metabolism;Organismal Systems;Metabolism	Global and overview maps;Global and overview maps;Environmental adaptation;Lipid metabolism	ko01100//Metabolic pathways;ko01110//Biosynthesis of secondary metabolites;ko04626//Plant-pathogen interaction;ko00062//Fatty acid elongation	K15397;K15397;K15397;K15397	GO:0016020//membrane	GO:0003985//acetyl-CoA C-acetyltransferase activity;GO:0004315//3-oxoacyl-[acyl-carrier-protein] synthase activity;GO:0016747//transferase activity, transferring acyl groups other than amino-acyl groups	GO:0006631//fatty acid metabolic process;GO:0006633//fatty acid biosynthetic process
State 1,2 -vs- State 1,3	SK1G00051268	2	9.26371531265178e-18	3.99484e-16	4CL3	BAS77267.1 Os02g0177600, partial [Oryza sativa Japonica Group]	Metabolism;Metabolism;Metabolism;Metabolism	Global and overview maps;Global and overview maps;Biosynthesis of other secondary metabolites;Metabolism of cofactors and vitamins	ko01100//Metabolic pathways;ko01110//Biosynthesis of secondary metabolites;ko00940//Phenylpropanoid biosynthesis;ko00130//Ubiquinone and other terpenoid-quinone biosynthesis	K01904;K01904;K01904;K01904	-	GO:0003987//acetate-CoA ligase activity;GO:0004043//L-aminoadipate-semialdehyde dehydrogenase activity;GO:0008668//(2,3-dihydroxybenzoyl)adenylate synthase activity;GO:0008756//o-succinylbenzoate-CoA ligase activity;GO:0030729//acetoacetate-CoA ligase activity;GO:0047473//D-alanine-poly(phosphoribitol) ligase activity;GO:0050218//propionate-CoA ligase activity	GO:0009234//menaquinone biosynthetic process;GO:0019287//isopentenyl diphosphate biosynthetic process, mevalonate pathway;GO:0019290//siderophore biosynthetic process;GO:0019350//teichoic acid biosynthetic process;GO:0019427//acetyl-CoA biosynthetic process from acetate;GO:0019878//lysine biosynthetic process via aminoadipic acid
State 1,2 -vs- State 1,3	SK1G00051287	3	2.50158236998449e-08	5.2061e-07	MIMI_L728	EAY84727.1 hypothetical protein OsI_06095 [Oryza sativa Indica Group]	-	-	-	-	-	-	-
State 1,2 -vs- State 1,3	SK1G00051295	5	5.84744941952418e-33	5.16964e-31	CCR1	XP_015625865.1 cinnamoyl-CoA reductase 2 [Oryza sativa Japonica Group]	Metabolism;Metabolism;Metabolism	Global and overview maps;Global and overview maps;Biosynthesis of other secondary metabolites	ko01100//Metabolic pathways;ko01110//Biosynthesis of secondary metabolites;ko00940//Phenylpropanoid biosynthesis	K09753;K09753;K09753	-	GO:0003824//catalytic activity;GO:0003854//3-beta-hydroxy-delta5-steroid dehydrogenase activity;GO:0003978//UDP-glucose 4-epimerase activity;GO:0004316//3-oxoacyl-[acyl-carrier-protein] reductase (NADPH) activity;GO:0008446//GDP-mannose 4,6-dehydratase activity;GO:0008460//dTDP-glucose 4,6-dehydratase activity;GO:0008667//2,3-dihydro-2,3-dihydroxybenzoate dehydrogenase activity;GO:0008712//ADP-gl…	GO:0000271//polysaccharide biosynthetic process;GO:0005975//carbohydrate metabolic process;GO:0006012//galactose metabolic process;GO:0006633//fatty acid biosynthetic process;GO:0006694//steroid biosynthetic process;GO:0008152//metabolic process;GO:0009243//O antigen biosynthetic process;GO:0009244//lipopolysaccharide core region biosynthetic process;GO:0019305//dTDP-rhamnose biosynthetic process…
State 1,2 -vs- State 1,3	SK1G00051298	1	3.93550360545299e-24	2.41855e-22	WRKY71	Q6IEL0.1 RecName: Full=WRKY transcription factor WRKY71; Short=OsWRKY71 [Oryza sativa Indica Group]	-	-	-	-	-	GO:0003700//transcription factor activity, sequence-specific DNA binding;GO:0043565//sequence-specific DNA binding	GO:0006355//regulation of transcription, DNA-templated
State 1,2 -vs- State 1,3	SK1G00051306	3	5.39695885452363e-09	1.20036e-07	--	-	-	-	-	-	-	-	-
State 1,2 -vs- State 1,3	SK1G00051320	2	3.70454211148367e-66	8.48557e-64	CYP71Z18	KAF2943478.1 hypothetical protein DAI22_02g066600 [Oryza sativa Japonica Group]	-	-	-	-	-	GO:0005506//iron ion binding;GO:0016705//oxidoreductase activity, acting on paired donors, with incorporation or reduction of molecular oxygen;GO:0020037//heme binding	GO:0055114//oxidation-reduction process
State 1,2 -vs- State 1,3	SK1G00051339	5	1.01871789118308e-08	2.20733e-07	MYB44	XP_015623498.1 transcription factor MYB44 [Oryza sativa Japonica Group]	-	-	-	-	GO:0005634//nucleus	GO:0003676//nucleic acid binding;GO:0005524//ATP binding;GO:0016818//hydrolase activity, acting on acid anhydrides, in phosphorus-containing anhydrides	GO:0006338//chromatin remodeling
State 1,2 -vs- State 1,3	SK1G00051340	2	1.93596058810828e-11	5.33524e-10	CAD2	XP_015626408.1 cinnamyl alcohol dehydrogenase 2 [Oryza sativa Japonica Group]	Metabolism;Metabolism;Metabolism	Global and overview maps;Global and overview maps;Biosynthesis of other secondary metabolites	ko01100//Metabolic pathways;ko01110//Biosynthesis of secondary metabolites;ko00940//Phenylpropanoid biosynthesis	K00083;K00083;K00083	-	GO:0004024//alcohol dehydrogenase activity, zinc-dependent;GO:0008270//zinc ion binding;GO:0008743//L-threonine 3-dehydrogenase activity;GO:0016491//oxidoreductase activity;GO:0016655//oxidoreductase activity, acting on NAD(P)H, quinone or similar compound as acceptor;GO:0018467//formaldehyde dehydrogenase activity;GO:0050607//mycothiol-dependent formaldehyde dehydrogenase activity;GO:0051287//NA…	GO:0002376//immune system process;GO:0006113//fermentation;GO:0006567//threonine catabolic process;GO:0008152//metabolic process;GO:0009404//toxin metabolic process;GO:0010127//mycothiol-dependent detoxification;GO:0019439//aromatic compound catabolic process;GO:0030494//bacteriochlorophyll biosynthetic process;GO:0046292//formaldehyde metabolic process;GO:0055114//oxidation-reduction process
State 1,2 -vs- State 1,3	SK1G00051341	4	5.39176253010335e-13	1.66109e-11	UGT84A13	XP_015627583.1 gallate 1-beta-glucosyltransferase [Oryza sativa Japonica Group]	-	-	-	-	-	GO:0008194//UDP-glycosyltransferase activity;GO:0016758//transferase activity, transferring hexosyl groups	GO:0005975//carbohydrate metabolic process;GO:0030259//lipid glycosylation
State 1,2 -vs- State 1,3	SK1G00051347	4	3.04820235238684e-76	8.60203e-74	--	KAB8086218.1 hypothetical protein EE612_009388 [Oryza sativa]	-	-	-	-	GO:0000314//organellar small ribosomal subunit;GO:0005840//ribosome;GO:0022627//cytosolic small ribosomal subunit	GO:0003735//structural constituent of ribosome	GO:0006412//translation
State 1,2 -vs- State 1,3	SK1G00051348	5	1.99214480456474e-08	4.1879e-07	MED11	XP_015623277.1 mediator of RNA polymerase II transcription subunit 11 [Oryza sativa Japonica Group]	-	-	-	-	GO:0016592//mediator complex	GO:0003712//transcription cofactor activity	GO:0006357//regulation of transcription from RNA polymerase II promoter
State 1,2 -vs- State 1,3	SK1G00051401	5	3.07517787820126e-37	3.06432e-35	RPS14C	KAF0934247.1 hypothetical protein E2562_023609 [Oryza meyeriana var. granulata] [Oryza meyeriana]	Genetic Information Processing	Translation	ko03010//Ribosome	K02955	GO:0005840//ribosome;GO:0022627//cytosolic small ribosomal subunit	GO:0003735//structural constituent of ribosome;GO:2001070//starch binding	GO:0006412//translation
State 1,2 -vs- State 1,3	SK1G00051414	5	3.95724038123083e-15	1.43613e-13	CRPK1	XP_015626953.1 cold-responsive protein kinase 1 isoform X1 [Oryza sativa Japonica Group]	-	-	-	-	-	GO:0003674//molecular_function;GO:0004672//protein kinase activity;GO:0005524//ATP binding	GO:0006468//protein phosphorylation;GO:0009306//protein secretion
State 1,2 -vs- State 1,3	SK1G00051433	2	4.04441030269094e-08	8.20394e-07	HPD	XP_015626163.1 4-hydroxyphenylpyruvate dioxygenase [Oryza sativa Japonica Group]	Metabolism;Metabolism;Metabolism;Metabolism	Global and overview maps;Metabolism of cofactors and vitamins;Amino acid metabolism;Amino acid metabolism	ko01100//Metabolic pathways;ko00130//Ubiquinone and other terpenoid-quinone biosynthesis;ko00350//Tyrosine metabolism;ko00360//Phenylalanine metabolism	K00457;K00457;K00457;K00457	-	GO:0003868//4-hydroxyphenylpyruvate dioxygenase activity	GO:0006559//L-phenylalanine catabolic process;GO:0006572//tyrosine catabolic process
State 1,2 -vs- State 1,3	SK1G00051434	2	1.33079354047843e-09	3.15059e-08	At1g14600	KAB8086028.1 hypothetical protein EE612_009088 [Oryza sativa]	-	-	-	-	-	-	-
State 1,2 -vs- State 1,3	SK1G00051467	5	3.48930709300139e-10	8.68633e-09	VQ22	XP_015623309.1 transcription factor MafA [Oryza sativa Japonica Group]	-	-	-	-	-	-	-
State 1,2 -vs- State 1,3	SK1G00051472	2	3.58273194130945e-08	7.31794e-07	ALIS1	KAB8086076.1 hypothetical protein EE612_009162 [Oryza sativa]	-	-	-	-	GO:0016020//membrane	-	-
State 1,2 -vs- State 1,3	SK1G00051483	3	5.26283869866208e-13	1.62279e-11	RISBZ4	XP_015623252.1 bZIP transcription factor RISBZ4-like isoform X1 [Oryza sativa Japonica Group]	-	-	-	-	GO:0030867//rough endoplasmic reticulum membrane	GO:0003677//DNA binding;GO:0003700//transcription factor activity, sequence-specific DNA binding;GO:0005524//ATP binding;GO:0043565//sequence-specific DNA binding	GO:0006355//regulation of transcription, DNA-templated;GO:0007059//chromosome segregation;GO:0023041//neuronal signal transduction;GO:0030261//chromosome condensation;GO:0070206//protein trimerization
State 1,2 -vs- State 1,3	SK1G00051548	1	7.95401900221232e-28	5.80907e-26	MPK3	EAY84476.1 hypothetical protein OsI_05850 [Oryza sativa Indica Group]	Environmental Information Processing	Signal transduction	ko04016//MAPK signaling pathway - plant	K20535	-	GO:0004672//protein kinase activity;GO:0005524//ATP binding;GO:0016709//oxidoreductase activity, acting on paired donors, with incorporation or reduction of molecular oxygen, NAD(P)H as one donor, and incorporation of one atom of oxygen	GO:0006468//protein phosphorylation;GO:0006744//ubiquinone biosynthetic process
State 1,2 -vs- State 1,3	SK1G00051557	1	1.14231009079589e-10	2.96069e-09	Os02g0149800	XP_025878969.1 probable protein phosphatase 2C 10 isoform X1 [Oryza sativa Japonica Group]	-	-	-	-	-	GO:0016791//phosphatase activity	-
State 1,2 -vs- State 1,3	SK1G00051566	2	3.68865003688599e-28	2.73931e-26	--	XP_015625447.1 uncharacterized protein LOC4328314 [Oryza sativa Japonica Group]	-	-	-	-	-	-	-
State 1,2 -vs- State 1,3	SK1G00051579	2	2.59539748044718e-08	5.38228e-07	PSKR2	AAU12604.1 putative leucine-rich repeat receptor-like kinase [Oryza sativa Indica Group]	-	-	-	-	-	-	-
State 1,2 -vs- State 1,3	SK1G00051625	2	0	0	--	EEC72385.1 hypothetical protein OsI_05658 [Oryza sativa Indica Group]	-	-	-	-	-	-	-
State 1,2 -vs- State 1,3	SK1G00051638	5	1.800472478138e-37	1.7992e-35	BI1	XP_015625700.1 bax inhibitor 1 [Oryza sativa Japonica Group]	-	-	-	-	-	-	-
State 1,2 -vs- State 1,3	SK1G00051650	4	3.28553800582787e-14	1.10169e-12	--	ABR26063.1 unknown [Oryza sativa Indica Group]	-	-	-	-	-	GO:0003677//DNA binding;GO:0009036//Type II site-specific deoxyribonuclease activity	GO:0009307//DNA restriction-modification system
State 1,2 -vs- State 1,3	SK1G00051683	3	5.9701334676073e-09	1.32534e-07	--	XP_015625112.1 titin homolog [Oryza sativa Japonica Group]	-	-	-	-	-	GO:0003677//DNA binding	-
State 1,2 -vs- State 1,3	SK1G00051706	2	8.72887214735574e-11	2.29271e-09	Os02g0134000	B9F2L1.1 RecName: Full=Phosphopantetheine adenylyltransferase 2; AltName: Full=Dephospho-CoA pyrophosphorylase 2; AltName: Full=Pantetheine-phosphate adenylyltransferase 2 [Oryza sativa Japonica Group]	Metabolism;Metabolism	Global and overview maps;Metabolism of cofactors and vitamins	ko01100//Metabolic pathways;ko00770//Pantothenate and CoA biosynthesis	K02201;K02201	-	-	-
State 1,2 -vs- State 1,3	SK1G00051728	4	8.06447804199043e-14	2.62188e-12	RPL3	XP_015625363.1 50S ribosomal protein L3, chloroplastic [Oryza sativa Japonica Group]	Genetic Information Processing	Translation	ko03010//Ribosome	K02906	GO:0005840//ribosome;GO:0022625//cytosolic large ribosomal subunit	GO:0003735//structural constituent of ribosome	GO:0006412//translation
State 1,2 -vs- State 1,3	SK1G00051733	1	3.4754925276508e-30	2.78632e-28	HCF173	XP_015623533.1 uncharacterized protein LOC4328240 [Oryza sativa Japonica Group]	-	-	-	-	-	GO:0003824//catalytic activity;GO:0003854//3-beta-hydroxy-delta5-steroid dehydrogenase activity;GO:0004488//methylenetetrahydrofolate dehydrogenase (NADP+) activity;GO:0008667//2,3-dihydro-2,3-dihydroxybenzoate dehydrogenase activity;GO:0016616//oxidoreductase activity, acting on the CH-OH group of donors, NAD or NADP as acceptor;GO:0016655//oxidoreductase activity, acting on NAD(P)H, quinone or …	GO:0005975//carbohydrate metabolic process;GO:0006694//steroid biosynthetic process;GO:0006813//potassium ion transport;GO:0008152//metabolic process;GO:0055114//oxidation-reduction process
State 1,2 -vs- State 1,3	SK1G00051784	1	1.29217221883957e-120	7.12209e-118	LDHA	XP_015626150.1 L-lactate dehydrogenase A [Oryza sativa Japonica Group]	Metabolism;Metabolism;Metabolism;Metabolism;Metabolism;Metabolism	Global and overview maps;Global and overview maps;Carbohydrate metabolism;Amino acid metabolism;Carbohydrate metabolism;Carbohydrate metabolism	ko01100//Metabolic pathways;ko01110//Biosynthesis of secondary metabolites;ko00010//Glycolysis / Gluconeogenesis;ko00270//Cysteine and methionine metabolism;ko00620//Pyruvate metabolism;ko00640//Propanoate metabolism	K00016;K00016;K00016;K00016;K00016;K00016	GO:0005737//cytoplasm	GO:0004459//L-lactate dehydrogenase activity;GO:0004553//hydrolase activity, hydrolyzing O-glycosyl compounds;GO:0016491//oxidoreductase activity;GO:0016616//oxidoreductase activity, acting on the CH-OH group of donors, NAD or NADP as acceptor;GO:0030060//L-malate dehydrogenase activity;GO:0051287//NAD binding;GO:0070403//NAD+ binding	GO:0005975//carbohydrate metabolic process;GO:0006099//tricarboxylic acid cycle;GO:0006631//fatty acid metabolic process;GO:0006813//potassium ion transport;GO:0046168//glycerol-3-phosphate catabolic process;GO:0055114//oxidation-reduction process
State 1,2 -vs- State 1,3	SK1G00051853	2	4.7512419112646e-206	5.07879e-203	BIP1	XP_015625618.1 heat shock 70 kDa protein BIP1 [Oryza sativa Japonica Group]	Genetic Information Processing;Genetic Information Processing	Folding, sorting and degradation;Folding, sorting and degradation	ko04141//Protein processing in endoplasmic reticulum;ko03060//Protein export	K09490;K09490	-	GO:0004856//xylulokinase activity;GO:0005515//protein binding;GO:0005524//ATP binding;GO:0016773//phosphotransferase activity, alcohol group as acceptor;GO:0016787//hydrolase activity;GO:0016887//ATPase activity;GO:0051082//unfolded protein binding	GO:0005975//carbohydrate metabolic process;GO:0005997//xylulose metabolic process;GO:0006457//protein folding;GO:0006950//response to stress;GO:0008360//regulation of cell shape;GO:0042732//D-xylose metabolic process;GO:0043093//FtsZ-dependent cytokinesis
State 1,2 -vs- State 1,3	SK1G00051871	4	3.53620018815685e-08	7.22708e-07	EMB975	EAY84220.1 hypothetical protein OsI_05602 [Oryza sativa Indica Group]	-	-	-	-	-	-	-
State 1,2 -vs- State 1,3	SK1G00051872	1	2.44069287523587e-08	5.08838e-07	PIX13	XP_015625683.1 probable serine/threonine-protein kinase PIX13 [Oryza sativa Japonica Group]	-	-	-	-	-	GO:0004672//protein kinase activity;GO:0005524//ATP binding	GO:0006468//protein phosphorylation
State 1,2 -vs- State 1,3	SK1G00051898	4	9.57543354003776e-29	7.24836e-27	GT43H	CAH65757.1 OSIGBa0123D13.6 [Oryza sativa]	-	-	-	-	GO:0016020//membrane	GO:0004553//hydrolase activity, hydrolyzing O-glycosyl compounds;GO:0015018//galactosylgalactosylxylosylprotein 3-beta-glucuronosyltransferase activity	GO:0005975//carbohydrate metabolic process
State 1,2 -vs- State 1,3	SK1G00051906	2	1.20658384473326e-63	2.51848e-61	COMTL2	XP_015634433.1 caffeate O-methyltransferase-like protein 2 [Oryza sativa Japonica Group]	-	-	-	-	-	GO:0003677//DNA binding;GO:0008168//methyltransferase activity;GO:0008171//O-methyltransferase activity;GO:0046983//protein dimerization activity	GO:0006355//regulation of transcription, DNA-templated;GO:0006480//N-terminal protein amino acid methylation;GO:0016051//carbohydrate biosynthetic process;GO:0032259//methylation
State 1,2 -vs- State 1,3	SK1G00051914	4	4.76622383536585e-16	1.83346e-14	--	CAH67829.1 B0616E02-H0507E05.5 [Oryza sativa]	-	-	-	-	GO:0009318//exodeoxyribonuclease VII complex	GO:0008855//exodeoxyribonuclease VII activity	GO:0006308//DNA catabolic process
State 1,2 -vs- State 1,3	SK1G00051997	3	6.38465290046912e-26	4.28172e-24	--	KAB8094725.1 hypothetical protein EE612_022006 [Oryza sativa]	-	-	-	-	-	-	-
State 1,2 -vs- State 1,3	SK1G00052077	1	3.64313787229057e-18	1.62262e-16	--	EEC76713.1 hypothetical protein OsI_14727 [Oryza sativa Indica Group]	-	-	-	-	GO:0005801//cis-Golgi network;GO:0016020//membrane	GO:0005524//ATP binding	GO:0006886//intracellular protein transport;GO:0007059//chromosome segregation;GO:0030261//chromosome condensation
State 1,2 -vs- State 1,3	SK1G00052099	4	3.23937855625137e-15	1.18414e-13	--	AHW98635.1 hypothetical protein [Oryza glaberrima]	-	-	-	-	GO:0033179//proton-transporting V-type ATPase, V0 domain	GO:0005524//ATP binding;GO:0008134//transcription factor binding;GO:0015078//hydrogen ion transmembrane transporter activity;GO:0042803//protein homodimerization activity;GO:0070840//dynein complex binding	GO:0007059//chromosome segregation;GO:0009401//phosphoenolpyruvate-dependent sugar phosphotransferase system;GO:0030261//chromosome condensation;GO:1902600//hydrogen ion transmembrane transport
State 1,2 -vs- State 1,3	SK1G00052165	2	8.50405656682762e-12	2.40948e-10	yif1b	EAY93006.1 hypothetical protein OsI_14805 [Oryza sativa Indica Group]	-	-	-	-	GO:0005789//endoplasmic reticulum membrane;GO:0016021//integral component of membrane	-	GO:0006888//ER to Golgi vesicle-mediated transport
State 1,2 -vs- State 1,3	SK1G00052189	2	1.86091297793936e-29	1.462e-27	ETR2	Q8H1X1.3 RecName: Full=Ethylene receptor 2; Short=OS-ETR2; AltName: Full=OsETRL1; AltName: Full=Protein ETYLENE RESPONSE 2-LIKE 1; Short=Os-ERL1 [Oryza sativa Indica Group]	Environmental Information Processing;Environmental Information Processing	Signal transduction;Signal transduction	ko04075//Plant hormone signal transduction;ko04016//MAPK signaling pathway - plant	K14509;K14509	GO:0016020//membrane	GO:0000155//phosphorelay sensor kinase activity;GO:0000156//phosphorelay response regulator activity;GO:0004673//protein histidine kinase activity;GO:0005515//protein binding;GO:0005524//ATP binding	GO:0000160//phosphorelay signal transduction system;GO:0006355//regulation of transcription, DNA-templated;GO:0006796//phosphate-containing compound metabolic process;GO:0006817//phosphate ion transport;GO:0007165//signal transduction;GO:0030436//asexual sporulation;GO:0042173//regulation of sporulation resulting in formation of a cellular spore
State 1,2 -vs- State 1,3	SK1G00052226	2	8.15569486418515e-24	4.90942e-22	CPS4	Q6E7D7.1 RecName: Full=Syn-copalyl diphosphate synthase; Short=OsCPSsyn; Short=Syn-CPP synthase; AltName: Full=OsCPS4; AltName: Full=OsCyc1 [Oryza sativa Indica Group]	Metabolism;Metabolism	Global and overview maps;Metabolism of terpenoids and polyketides	ko01110//Biosynthesis of secondary metabolites;ko00904//Diterpenoid biosynthesis	K14043;K14043	-	GO:0000287//magnesium ion binding;GO:0003824//catalytic activity;GO:0010333//terpene synthase activity;GO:0016829//lyase activity;GO:0051007//squalene-hopene cyclase activity	GO:0019746//hopanoid biosynthetic process
State 1,2 -vs- State 1,3	SK1G00052230	2	7.88632531723882e-57	1.35044e-54	Os04g0179200	CAH66124.1 OSIGBa0109M01.2 [Oryza sativa]	Metabolism;Metabolism	Global and overview maps;Metabolism of terpenoids and polyketides	ko01110//Biosynthesis of secondary metabolites;ko00904//Diterpenoid biosynthesis	K13070;K13070	-	GO:0003824//catalytic activity;GO:0004316//3-oxoacyl-[acyl-carrier-protein] reductase (NADPH) activity;GO:0008667//2,3-dihydro-2,3-dihydroxybenzoate dehydrogenase activity;GO:0008678//2-deoxy-D-gluconate 3-dehydrogenase activity;GO:0016491//oxidoreductase activity;GO:0016630//protochlorophyllide reductase activity;GO:0016655//oxidoreductase activity, acting on NAD(P)H, quinone or similar compound…	GO:0000272//polysaccharide catabolic process;GO:0006631//fatty acid metabolic process;GO:0006633//fatty acid biosynthetic process;GO:0008152//metabolic process;GO:0015995//chlorophyll biosynthetic process;GO:0055114//oxidation-reduction process
State 1,2 -vs- State 1,3	SK1G00052234	2	8.64705002646453e-144	5.75518e-141	Os04g0179200	CAH66125.1 OSIGBa0109M01.3 [Oryza sativa]	Metabolism;Metabolism	Global and overview maps;Metabolism of terpenoids and polyketides	ko01110//Biosynthesis of secondary metabolites;ko00904//Diterpenoid biosynthesis	K13070;K13070	-	GO:0003824//catalytic activity;GO:0003854//3-beta-hydroxy-delta5-steroid dehydrogenase activity;GO:0004316//3-oxoacyl-[acyl-carrier-protein] reductase (NADPH) activity;GO:0008667//2,3-dihydro-2,3-dihydroxybenzoate dehydrogenase activity;GO:0008678//2-deoxy-D-gluconate 3-dehydrogenase activity;GO:0016491//oxidoreductase activity;GO:0016616//oxidoreductase activity, acting on the CH-OH group of don…	GO:0000272//polysaccharide catabolic process;GO:0006631//fatty acid metabolic process;GO:0006633//fatty acid biosynthetic process;GO:0006694//steroid biosynthetic process;GO:0008152//metabolic process;GO:0015995//chlorophyll biosynthetic process;GO:0055114//oxidation-reduction process
State 1,2 -vs- State 1,3	SK1G00052240	2	8.06783725247572e-25	5.09111e-23	KSL4	Q66QH3.1 RecName: Full=Syn-pimara-7,15-diene synthase; AltName: Full=9-beta-pimara-7,15-diene synthase; AltName: Full=Ent-kaurene synthase-like 4; Short=OsKS4; Short=OsKSL4; AltName: Full=OsDTS2 [Oryza sativa Indica Group]	Metabolism;Metabolism	Global and overview maps;Metabolism of terpenoids and polyketides	ko01110//Biosynthesis of secondary metabolites;ko00904//Diterpenoid biosynthesis	K14046;K14046	-	GO:0000287//magnesium ion binding;GO:0003676//nucleic acid binding;GO:0005524//ATP binding;GO:0010333//terpene synthase activity;GO:0016829//lyase activity	-
State 1,2 -vs- State 1,3	SK1G00052242	2	1.84273517453696e-47	2.54912e-45	CYP99A2	EAY93225.1 hypothetical protein OsI_15033 [Oryza sativa Indica Group]	Metabolism;Metabolism	Global and overview maps;Metabolism of terpenoids and polyketides	ko01110//Biosynthesis of secondary metabolites;ko00904//Diterpenoid biosynthesis	K16085;K16085	-	GO:0005506//iron ion binding;GO:0016705//oxidoreductase activity, acting on paired donors, with incorporation or reduction of molecular oxygen;GO:0020037//heme binding	GO:0055114//oxidation-reduction process
State 1,2 -vs- State 1,3	SK1G00052245	4	4.62493040218222e-15	1.67156e-13	--	CAH66021.1 OSIGBa0105N24.5 [Oryza sativa]	-	-	-	-	-	-	-
State 1,2 -vs- State 1,3	SK1G00052253	2	8.84560562015546e-09	1.92848e-07	At1g06640	EAY93218.1 hypothetical protein OsI_15024 [Oryza sativa Indica Group]	-	-	-	-	-	GO:0016491//oxidoreductase activity	GO:0055114//oxidation-reduction process
State 1,2 -vs- State 1,3	SK1G00052256	1	7.86331524396404e-39	8.03995e-37	ETFB	A2XQV4.1 RecName: Full=Electron transfer flavoprotein subunit beta, mitochondrial; Short=Beta-ETF; Flags: Precursor [Oryza sativa Indica Group]	-	-	-	-	-	-	-
State 1,2 -vs- State 1,3	SK1G00052292	5	2.26576716567687e-12	6.65487e-11	--	CAD39758.2 OSJNBa0059D20.11 [Oryza sativa Japonica Group]	-	-	-	-	-	-	-
State 1,2 -vs- State 1,3	SK1G00052357	3	5.96387950283151e-10	1.44688e-08	--	BAH95212.1 Os11g0291800 [Oryza sativa Japonica Group]	-	-	-	-	-	-	-
State 1,2 -vs- State 1,3	SK1G00052364	4	1.17815424081689e-19	5.76413e-18	UGT79	EAY93062.1 hypothetical protein OsI_14865 [Oryza sativa Indica Group]	-	-	-	-	-	GO:0008194//UDP-glycosyltransferase activity;GO:0016758//transferase activity, transferring hexosyl groups;GO:0018822//nitrile hydratase activity;GO:0051539//4 iron, 4 sulfur cluster binding;GO:0070283//radical SAM enzyme activity	GO:0006400//tRNA modification;GO:0050898//nitrile metabolic process
State 1,2 -vs- State 1,3	SK1G00052467	4	7.50198259499146e-21	3.86325e-19	At3g55800	XP_015633459.1 sedoheptulose-1,7-bisphosphatase, chloroplastic [Oryza sativa Japonica Group]	Metabolism;Metabolism;Metabolism	Global and overview maps;Global and overview maps;Energy metabolism	ko01100//Metabolic pathways;ko01200//Carbon metabolism;ko00710//Carbon fixation in photosynthetic organisms	K01100;K01100;K01100	-	-	-
State 1,2 -vs- State 1,3	SK1G00052477	3	9.96851112556986e-11	2.60088e-09	HIPP26	XP_015637237.1 heavy metal-associated isoprenylated plant protein 27 [Oryza sativa Japonica Group]	-	-	-	-	-	GO:0004190//aspartic-type endopeptidase activity;GO:0005507//copper ion binding;GO:0045340//mercury ion binding;GO:0046872//metal ion binding	GO:0006825//copper ion transport;GO:0015694//mercury ion transport;GO:0030436//asexual sporulation
State 1,2 -vs- State 1,3	SK1G00052497	4	4.79889446613792e-40	5.02318e-38	H1-I	XP_015637216.1 histone H1 [Oryza sativa Japonica Group]	-	-	-	-	GO:0000786//nucleosome	GO:0003677//DNA binding	GO:0006334//nucleosome assembly
State 1,2 -vs- State 1,3	SK1G00052566	4	2.1002440956539e-12	6.18415e-11	--	-	-	-	-	-	-	-	-
State 1,2 -vs- State 1,3	SK1G00052667	1	1.31951928675874e-10	3.40498e-09	TIC32	XP_015636691.1 short-chain dehydrogenase TIC 32, chloroplastic [Oryza sativa Japonica Group]	-	-	-	-	-	GO:0003824//catalytic activity;GO:0004316//3-oxoacyl-[acyl-carrier-protein] reductase (NADPH) activity;GO:0004757//sepiapterin reductase activity;GO:0008667//2,3-dihydro-2,3-dihydroxybenzoate dehydrogenase activity;GO:0008678//2-deoxy-D-gluconate 3-dehydrogenase activity;GO:0016491//oxidoreductase activity;GO:0016630//protochlorophyllide reductase activity;GO:0016757//transferase activity, transf…	GO:0000272//polysaccharide catabolic process;GO:0005975//carbohydrate metabolic process;GO:0006633//fatty acid biosynthetic process;GO:0006729//tetrahydrobiopterin biosynthetic process;GO:0015995//chlorophyll biosynthetic process;GO:0055114//oxidation-reduction process
State 1,2 -vs- State 1,3	SK1G00052710	5	6.35667435271126e-14	2.08394e-12	BHLH35	CAH66073.1 H0215E01.1 [Oryza sativa]	-	-	-	-	GO:0005737//cytoplasm	GO:0004736//pyruvate carboxylase activity;GO:0035596//methylthiotransferase activity;GO:0046983//protein dimerization activity;GO:0051539//4 iron, 4 sulfur cluster binding	GO:0006094//gluconeogenesis
State 1,2 -vs- State 1,3	SK1G00052880	4	1.63021300530469e-17	6.90345e-16	Os04g0339400	XP_015634128.1 probable aldo-keto reductase 3 [Oryza sativa Japonica Group]	-	-	-	-	-	GO:0047834//D-threo-aldose 1-dehydrogenase activity	-
State 1,2 -vs- State 1,3	SK1G00052884	4	1.92720663692984e-14	6.60663e-13	--	BAS88659.1 Os04g0340100 [Oryza sativa Japonica Group]	-	-	-	-	-	-	-
State 1,2 -vs- State 1,3	SK1G00052892	2	2.44198713651383e-82	7.76046e-80	TPS7	XP_015635171.1 alpha-humulene synthase [Oryza sativa Japonica Group]	-	-	-	-	GO:0000445//THO complex part of transcription export complex	GO:0000287//magnesium ion binding;GO:0010333//terpene synthase activity;GO:0016829//lyase activity	GO:0006397//mRNA processing
State 1,2 -vs- State 1,3	SK1G00052964	2	7.02735510634073e-15	2.49889e-13	--	XP_015636034.1 uncharacterized protein LOC4335571 [Oryza sativa Japonica Group]	-	-	-	-	-	-	-
State 1,2 -vs- State 1,3	SK1G00053007	3	1.88708082696319e-56	3.20033e-54	--	-	-	-	-	-	-	-	-
State 1,2 -vs- State 1,3	SK1G00053020	3	3.33307753241312e-53	5.22552e-51	--	-	-	-	-	-	-	-	-
State 1,2 -vs- State 1,3	SK1G00053022	2	6.5621092103919e-13	2.00936e-11	WAK2	KAF2933585.1 hypothetical protein DAI22_04g094800 [Oryza sativa Japonica Group]	-	-	-	-	-	GO:0004672//protein kinase activity;GO:0005509//calcium ion binding;GO:0005524//ATP binding;GO:0030247//polysaccharide binding	GO:0006468//protein phosphorylation
State 1,2 -vs- State 1,3	SK1G00053043	5	7.70038187907289e-42	8.54185e-40	CEQORH	XP_015636266.1 chloroplast envelope quinone oxidoreductase homolog [Oryza sativa Japonica Group]	Metabolism;Metabolism	Global and overview maps;Lipid metabolism	ko01110//Biosynthesis of secondary metabolites;ko00592//alpha-Linolenic acid metabolism	K00224;K00224	-	GO:0004024//alcohol dehydrogenase activity, zinc-dependent;GO:0008270//zinc ion binding;GO:0008743//L-threonine 3-dehydrogenase activity;GO:0016491//oxidoreductase activity;GO:0016655//oxidoreductase activity, acting on NAD(P)H, quinone or similar compound as acceptor;GO:0050607//mycothiol-dependent formaldehyde dehydrogenase activity;GO:0051287//NAD binding;GO:0051903//S-(hydroxymethyl)glutathio…	GO:0006113//fermentation;GO:0006567//threonine catabolic process;GO:0008152//metabolic process;GO:0009404//toxin metabolic process;GO:0010127//mycothiol-dependent detoxification;GO:0055114//oxidation-reduction process
State 1,2 -vs- State 1,3	SK1G00053047	4	4.44957035640637e-23	2.59865e-21	DTX16	XP_015633541.1 protein DETOXIFICATION 16 [Oryza sativa Japonica Group]	-	-	-	-	GO:0016020//membrane	GO:0015238//drug transmembrane transporter activity;GO:0015297//antiporter activity;GO:0042910//xenobiotic transporter activity	GO:0006855//drug transmembrane transport;GO:0042493//response to drug;GO:0055085//transmembrane transport
State 1,2 -vs- State 1,3	SK1G00053062	4	3.24508123988515e-14	1.09019e-12	CLKR27	EAZ30445.1 hypothetical protein OsJ_14493 [Oryza sativa Japonica Group]	Metabolism;Metabolism;Metabolism;Metabolism;Metabolism	Global and overview maps;Global and overview maps;Global and overview maps;Lipid metabolism;Metabolism of cofactors and vitamins	ko01100//Metabolic pathways;ko01110//Biosynthesis of secondary metabolites;ko01212//Fatty acid metabolism;ko00061//Fatty acid biosynthesis;ko00780//Biotin metabolism	K00059;K00059;K00059;K00059;K00059	-	GO:0003824//catalytic activity;GO:0004316//3-oxoacyl-[acyl-carrier-protein] reductase (NADPH) activity;GO:0004757//sepiapterin reductase activity;GO:0008667//2,3-dihydro-2,3-dihydroxybenzoate dehydrogenase activity;GO:0008678//2-deoxy-D-gluconate 3-dehydrogenase activity;GO:0016491//oxidoreductase activity;GO:0016630//protochlorophyllide reductase activity;GO:0016655//oxidoreductase activity, act…	GO:0000272//polysaccharide catabolic process;GO:0006633//fatty acid biosynthetic process;GO:0006729//tetrahydrobiopterin biosynthetic process;GO:0008152//metabolic process;GO:0015995//chlorophyll biosynthetic process;GO:0055114//oxidation-reduction process
State 1,2 -vs- State 1,3	SK1G00053082	3	3.09697121580332e-21	1.6281e-19	sll0608	XP_015635648.1 uncharacterized protein LOC4335622 isoform X3 [Oryza sativa Japonica Group]	-	-	-	-	-	-	-
State 1,2 -vs- State 1,3	SK1G00053087	3	8.48676676639211e-49	1.22693e-46	Os04g0379900	XP_015636259.1 stearoyl-[acyl-carrier-protein] 9-desaturase 5, chloroplastic [Oryza sativa Japonica Group]	Metabolism;Metabolism;Metabolism;Metabolism	Global and overview maps;Global and overview maps;Lipid metabolism;Lipid metabolism	ko01100//Metabolic pathways;ko01212//Fatty acid metabolism;ko00061//Fatty acid biosynthesis;ko01040//Biosynthesis of unsaturated fatty acids	K03921;K03921;K03921;K03921	-	GO:0004767//sphingomyelin phosphodiesterase activity;GO:0016491//oxidoreductase activity;GO:0045300//acyl-[acyl-carrier-protein] desaturase activity;GO:0046872//metal ion binding	GO:0006631//fatty acid metabolic process;GO:0055114//oxidation-reduction process
State 1,2 -vs- State 1,3	SK1G00053091	2	4.78223159716424e-09	1.07416e-07	At1g67480	XP_015636199.1 F-box/kelch-repeat protein At1g67480 [Oryza sativa Japonica Group]	-	-	-	-	-	GO:0005515//protein binding	-
State 1,2 -vs- State 1,3	SK1G00053130	5	4.78844248030565e-11	1.28158e-09	Dml	XP_015636336.1 uncharacterized protein LOC4335655 [Oryza sativa Japonica Group]	-	-	-	-	-	GO:0004451//isocitrate lyase activity;GO:0008807//carboxyvinyl-carboxyphosphonate phosphorylmutase activity;GO:0033978//phosphonopyruvate hydrolase activity;GO:0046421//methylisocitrate lyase activity;GO:0050188//phosphoenolpyruvate mutase activity	GO:0006099//tricarboxylic acid cycle;GO:0019629//propionate catabolic process, 2-methylcitrate cycle;GO:0019634//organic phosphonate metabolic process;GO:0019752//carboxylic acid metabolic process
State 1,2 -vs- State 1,3	SK1G00053143	2	1.13900362153121e-13	3.66146e-12	CAMTA4	XP_015635911.1 calmodulin-binding transcription activator 4 isoform X1 [Oryza sativa Japonica Group]	-	-	-	-	-	GO:0003677//DNA binding;GO:0005515//protein binding	-
State 1,2 -vs- State 1,3	SK1G00053190	2	1.47871575045816e-10	3.79634e-09	ERF113	EAY93947.1 hypothetical protein OsI_15721 [Oryza sativa Indica Group]	-	-	-	-	-	GO:0003700//transcription factor activity, sequence-specific DNA binding	GO:0006355//regulation of transcription, DNA-templated
State 1,2 -vs- State 1,3	SK1G00053210	4	7.71433106478722e-58	1.38134e-55	HAK1	XP_015635766.1 potassium transporter 1 [Oryza sativa Japonica Group]	-	-	-	-	GO:0016020//membrane	GO:0015079//potassium ion transmembrane transporter activity	GO:0006813//potassium ion transport;GO:0071805//potassium ion transmembrane transport
State 1,2 -vs- State 1,3	SK1G00053214	2	9.09063375754717e-41	9.74687e-39	CNX1	EAY93972.1 hypothetical protein OsI_15749 [Oryza sativa Indica Group]	Genetic Information Processing;Cellular Processes	Folding, sorting and degradation;Transport and catabolism	ko04141//Protein processing in endoplasmic reticulum;ko04145//Phagosome	K08054;K08054	GO:0005783//endoplasmic reticulum;GO:0016020//membrane	GO:0005509//calcium ion binding;GO:0008948//oxaloacetate decarboxylase activity;GO:0015081//sodium ion transmembrane transporter activity;GO:0051082//unfolded protein binding	GO:0006457//protein folding;GO:0036376//sodium ion export from cell
State 1,2 -vs- State 1,3	SK1G00053220	2	5.4274464319401e-10	1.3231e-08	--	-	-	-	-	-	-	-	GO:0015628//protein secretion by the type II secretion system
State 1,2 -vs- State 1,3	SK1G00053224	3	2.5676672643574e-10	6.48481e-09	BRG3	XP_015633677.1 probable BOI-related E3 ubiquitin-protein ligase 2 [Oryza sativa Japonica Group]	-	-	-	-	-	-	-
State 1,2 -vs- State 1,3	SK1G00053231	2	1.73592561989769e-08	3.68219e-07	ACS	CAH66525.1 H0502B11.5 [Oryza sativa]	Metabolism;Metabolism;Metabolism;Metabolism;Metabolism;Metabolism;Metabolism	Global and overview maps;Global and overview maps;Global and overview maps;Carbohydrate metabolism;Carbohydrate metabolism;Carbohydrate metabolism;Carbohydrate metabolism	ko01100//Metabolic pathways;ko01110//Biosynthesis of secondary metabolites;ko01200//Carbon metabolism;ko00010//Glycolysis / Gluconeogenesis;ko00620//Pyruvate metabolism;ko00630//Glyoxylate and dicarboxylate metabolism;ko00640//Propanoate metabolism	K01895;K01895;K01895;K01895;K01895;K01895;K01895	-	GO:0003987//acetate-CoA ligase activity;GO:0004043//L-aminoadipate-semialdehyde dehydrogenase activity;GO:0008668//(2,3-dihydroxybenzoyl)adenylate synthase activity;GO:0008756//o-succinylbenzoate-CoA ligase activity;GO:0030729//acetoacetate-CoA ligase activity;GO:0047473//D-alanine-poly(phosphoribitol) ligase activity;GO:0050218//propionate-CoA ligase activity	GO:0009234//menaquinone biosynthetic process;GO:0019287//isopentenyl diphosphate biosynthetic process, mevalonate pathway;GO:0019290//siderophore biosynthetic process;GO:0019350//teichoic acid biosynthetic process;GO:0019427//acetyl-CoA biosynthetic process from acetate;GO:0019878//lysine biosynthetic process via aminoadipic acid
State 1,2 -vs- State 1,3	SK1G00053246	2	2.41740544489034e-16	9.48543e-15	ADT6	KAF2933846.1 hypothetical protein DAI22_04g117400 [Oryza sativa Japonica Group]	Metabolism;Metabolism;Metabolism;Metabolism	Global and overview maps;Global and overview maps;Global and overview maps;Amino acid metabolism	ko01100//Metabolic pathways;ko01110//Biosynthesis of secondary metabolites;ko01230//Biosynthesis of amino acids;ko00400//Phenylalanine, tyrosine and tryptophan biosynthesis	K05359;K05359;K05359;K05359	-	GO:0004505//phenylalanine 4-monooxygenase activity;GO:0004664//prephenate dehydratase activity	GO:0006559//L-phenylalanine catabolic process;GO:0009094//L-phenylalanine biosynthetic process
State 1,2 -vs- State 1,3	SK1G00053327	3	6.86987311997013e-13	2.10178e-11	HTR2	XP_015633495.1 histone H3-like centromeric protein CSE4 [Oryza sativa Japonica Group]	-	-	-	-	GO:0071821//FANCM-MHF complex	GO:0003677//DNA binding	-
State 1,2 -vs- State 1,3	SK1G00053346	3	6.62010488058164e-200	6.67212e-197	--	-	-	-	-	-	-	-	GO:0006817//phosphate ion transport
State 1,2 -vs- State 1,3	SK1G00053370	5	5.04229286257726e-09	1.12788e-07	RPS10-1	KAF0893826.1 hypothetical protein E2562_029710 [Oryza meyeriana var. granulata] [Oryza meyeriana]	Genetic Information Processing	Translation	ko03010//Ribosome	K02947	-	-	-
State 1,2 -vs- State 1,3	SK1G00053378	4	2.00458229303984e-12	5.91729e-11	MRS2-D	XP_015635013.2 putative magnesium transporter MRS2-D isoform X1 [Oryza sativa Japonica Group]	-	-	-	-	GO:0016020//membrane	GO:0046873//metal ion transmembrane transporter activity	GO:0030001//metal ion transport;GO:0055085//transmembrane transport
State 1,2 -vs- State 1,3	SK1G00053384	3	2.71263633346843e-40	2.87352e-38	SAPK7	XP_015636932.1 serine/threonine-protein kinase SAPK7 [Oryza sativa Japonica Group]	Environmental Information Processing;Environmental Information Processing	Signal transduction;Signal transduction	ko04075//Plant hormone signal transduction;ko04016//MAPK signaling pathway - plant	K14498;K14498	-	GO:0004672//protein kinase activity;GO:0005524//ATP binding	GO:0006383//transcription from RNA polymerase III promoter;GO:0006468//protein phosphorylation;GO:0030254//protein secretion by the type III secretion system
State 1,2 -vs- State 1,3	SK1G00053387	2	1.03924285851438e-09	2.47698e-08	FUT13	XP_015636405.1 alpha-(1,4)-fucosyltransferase [Oryza sativa Japonica Group]	Metabolism;Metabolism	Global and overview maps;Glycan biosynthesis and metabolism	ko01100//Metabolic pathways;ko00513//Various types of N-glycan biosynthesis	K14412;K14412	GO:0016020//membrane	GO:0008417//fucosyltransferase activity	GO:0006486//protein glycosylation
State 1,2 -vs- State 1,3	SK1G00053409	3	3.64677471427609e-19	1.74073e-17	TCHQD	CAZ68077.1 tetrachlorohydroquinone dehalogenase [Oryza sativa Indica Group]	-	-	-	-	-	GO:0005515//protein binding;GO:0016034//maleylacetoacetate isomerase activity	GO:0006559//L-phenylalanine catabolic process;GO:0006572//tyrosine catabolic process;GO:0006749//glutathione metabolic process
State 1,2 -vs- State 1,3	SK1G00053446	2	4.09767984830509e-78	1.21467e-75	NPF4.4	XP_015633682.1 protein NRT1/ PTR FAMILY 4.4 [Oryza sativa Japonica Group]	-	-	-	-	GO:0016020//membrane	GO:0015333//peptide:proton symporter activity;GO:0022857//transmembrane transporter activity	GO:0015833//peptide transport;GO:0055085//transmembrane transport
State 1,2 -vs- State 1,3	SK1G00053498	4	1.45818244603649e-30	1.19901e-28	DMAS1-D	OVA09113.1 Aldo/keto reductase [Macleaya cordata]	-	-	-	-	GO:0005634//nucleus;GO:0033557//Slx1-Slx4 complex	GO:0047834//D-threo-aldose 1-dehydrogenase activity	GO:0006260//DNA replication;GO:0006281//DNA repair
State 1,2 -vs- State 1,3	SK1G00053513	4	3.18207590646038e-27	2.27683e-25	At3g27390	XP_015637256.1 uncharacterized membrane protein At3g27390 [Oryza sativa Japonica Group]	-	-	-	-	GO:0005886//plasma membrane;GO:0016020//membrane	GO:0003674//molecular_function	GO:0008150//biological_process
State 1,2 -vs- State 1,3	SK1G00053523	4	5.95807741538342e-71	1.50122e-68	HTR4	RDX80863.1 hypothetical protein CR513_38538, partial [Mucuna pruriens]	-	-	-	-	GO:0071821//FANCM-MHF complex	GO:0003677//DNA binding	GO:0006352//DNA-templated transcription, initiation
State 1,2 -vs- State 1,3	SK1G00053524	4	9.10685914757275e-12	2.57407e-10	--	XP_015635873.1 myosin heavy chain, embryonic smooth muscle isoform isoform X1 [Oryza sativa Japonica Group]	-	-	-	-	-	GO:0005524//ATP binding	GO:0007059//chromosome segregation;GO:0030261//chromosome condensation
State 1,2 -vs- State 1,3	SK1G00053580	2	3.03169204786479e-41	3.30071e-39	--	EAZ30964.1 hypothetical protein OsJ_15042 [Oryza sativa Japonica Group]	Metabolism;Metabolism;Metabolism;Metabolism	Global and overview maps;Global and overview maps;Carbohydrate metabolism;Carbohydrate metabolism	ko01100//Metabolic pathways;ko01110//Biosynthesis of secondary metabolites;ko00010//Glycolysis / Gluconeogenesis;ko00052//Galactose metabolism	K01785;K01785;K01785;K01785	-	GO:0004034//aldose 1-epimerase activity;GO:0016853//isomerase activity	GO:0005975//carbohydrate metabolic process;GO:0006012//galactose metabolic process
State 1,2 -vs- State 1,3	SK1G00053585	5	3.3535079848545e-15	1.22332e-13	rangrf	XP_015635989.1 ran guanine nucleotide release factor isoform X1 [Oryza sativa Japonica Group]	-	-	-	-	-	-	-
State 1,2 -vs- State 1,3	SK1G00053596	4	2.84061689737466e-70	6.91054e-68	PSRP3	XP_015633986.1 30S ribosomal protein 3, chloroplastic [Oryza sativa Japonica Group]	-	-	-	-	GO:0005840//ribosome	GO:0003735//structural constituent of ribosome	GO:0006412//translation
State 1,2 -vs- State 1,3	SK1G00053621	2	2.06188807555075e-12	6.07628e-11	BADH1	EEC77423.1 hypothetical protein OsI_16212 [Oryza sativa Indica Group]	Metabolism;Metabolism	Global and overview maps;Amino acid metabolism	ko01100//Metabolic pathways;ko00260//Glycine, serine and threonine metabolism	K00130;K00130	-	GO:0003842//1-pyrroline-5-carboxylate dehydrogenase activity;GO:0004350//glutamate-5-semialdehyde dehydrogenase activity;GO:0004491//methylmalonate-semialdehyde dehydrogenase (acylating) activity;GO:0004777//succinate-semialdehyde dehydrogenase (NAD+) activity;GO:0008802//betaine-aldehyde dehydrogenase activity;GO:0009013//succinate-semialdehyde dehydrogenase [NAD(P)+] activity;GO:0016491//oxidor…	GO:0006527//arginine catabolic process;GO:0006561//proline biosynthetic process;GO:0006562//proline catabolic process;GO:0006574//valine catabolic process;GO:0006578//amino-acid betaine biosynthetic process;GO:0009450//gamma-aminobutyric acid catabolic process;GO:0010124//phenylacetate catabolic process;GO:0055114//oxidation-reduction process
State 1,2 -vs- State 1,3	SK1G00053645	2	4.14637685394207e-08	8.39148e-07	--	EEC77440.1 hypothetical protein OsI_16242 [Oryza sativa Indica Group]	-	-	-	-	-	-	GO:0042138//meiotic DNA double-strand break formation
State 1,2 -vs- State 1,3	SK1G00053654	5	6.49883630023387e-14	2.12659e-12	--	XP_015634510.1 heavy metal-associated isoprenylated plant protein 16 [Oryza sativa Japonica Group]	-	-	-	-	-	GO:0046872//metal ion binding	-
State 1,2 -vs- State 1,3	SK1G00053655	2	3.30374229358147e-61	6.51059e-59	RGA5	XP_015634576.1 heavy metal-associated isoprenylated plant protein 47 [Oryza sativa Japonica Group]	-	-	-	-	GO:0016021//integral component of membrane	GO:0061630//ubiquitin protein ligase activity	GO:0016567//protein ubiquitination
State 1,2 -vs- State 1,3	SK1G00053669	2	1.04423386204112e-08	2.25707e-07	--	XP_015633624.1 uncharacterized protein LOC4336124 isoform X1 [Oryza sativa Japonica Group]	-	-	-	-	GO:0005577//fibrinogen complex;GO:0039679//viral occlusion body	GO:0005102//receptor binding	GO:0030168//platelet activation;GO:0051258//protein polymerization
[truncated: 733 more rows]
