# Supplementary material for: Multiomics analysis of the molecular and single-cell responses of rice after deep-space flight on Chang'e-5
Source: Research Square preprint supplement (doi:10.21203/rs.3.rs-7211908/v1), 2025-08-22
Supplement: Supplementary file 10 [file f55b8f4e0c7416b51bc5d458.xlsx]

## Sheet: Sheet1
Supplementary Data 2. ScRNA-seq intergroup differentially expressed genes.
Cluster	Gene Id	Gene name	Group.1	Group.2	Cells.1	Cells.2	Pct.1	Pct.2	Log2Fc	P_Value	P_Val_Adjust	Significance	Symbol	Description	Kegg_A_Class	Kegg_B_Class	Pathway	K_Id	Go Component	Go Function	Go Process
Mesophyll	SK1G00025717	SK1G00025717	0	0.231897	23989	15404	0	0.115	11.1798922328861	0	0	up	--	BAT00460.1 Os07g0194950 [Oryza sativa Japonica Group]	-	-	-	-	-	-	-
Mesophyll	SK1G00039419	SK1G00039419	114.652	75.4072	23989	15404	0.984	0.973	-0.604492	0	0	down	--	XP_025878262.1 cysteine-rich and transmembrane domain-containing protein WIH1-like [Oryza sativa Japonica Group]	-	-	-	-	-	-	-
Mesophyll	SK1G00042401	SK1G00042401	3.98351	2.32624	23989	15404	0.655	0.401	-0.776014	0	0	down	--	XP_006644148.2 PREDICTED: uncharacterized protein LOC102713129 isoform X1 [Oryza brachyantha]	-	-	-	-	-	-	-
Mesophyll	SK1G00045713	SK1G00045713	4.21952	2.41788	23989	15404	0.557	0.344	-0.803314	0	0	down	--	-	-	-	-	-	GO:0005789//endoplasmic reticulum membrane	-	GO:0034599//cellular response to oxidative stress
Mesophyll	SK1G00055036	PETE	0.011106	0.283981	23989	15404	0.006	0.126	4.66395224151458	0	0	up	PETE	XP_015642952.2 plastocyanin, chloroplastic [Oryza sativa Japonica Group]	Metabolism	Energy metabolism	ko00195//Photosynthesis	K02638	-	GO:0005507//copper ion binding;GO:0009055//electron carrier activity;GO:0050304//nitrous-oxide reductase activity	GO:0015979//photosynthesis;GO:0019333//denitrification pathway;GO:0055114//oxidation-reduction process
Mesophyll	SK1G00055154	SK1G00055154	0	0.36056	23989	15404	0	0.157	11.8164225613511	0	0	up	--	XP_015642558.1 uncharacterized protein LOC4339934 [Oryza sativa Japonica Group]	-	-	-	-	-	-	-
Mesophyll	SK1G00055345	SK1G00055345	5.049	3.83559	23989	15404	0.813	0.535	-0.396541	0	0	down	--	BAD68779.1 unknown protein [Oryza sativa Japonica Group]	-	-	-	-	GO:0016020//membrane;GO:0016021//integral component of membrane	GO:0000155//phosphorelay sensor kinase activity;GO:0004673//protein histidine kinase activity	-
Mesophyll	SK1G00059213	CYP73A2	5.70323	3.21267	23989	15404	0.755	0.599	-0.827987	0	0	down	CYP73A2	XP_015639656.1 trans-cinnamate 4-monooxygenase [Oryza sativa Japonica Group]	Metabolism;Metabolism;Metabolism;Metabolism;Metabolism;Metabolism	Global and overview maps;Global and overview maps;Biosynthesis of other secondary metabolites;Biosynthesis of other secondary metabolites;Metabolism of cofactors and vitamins;Biosynthesis of other secondary metabolites	ko01100//Metabolic pathways;ko01110//Biosynthesis of secondary metabolites;ko00940//Phenylpropanoid biosynthesis;ko00941//Flavonoid biosynthesis;ko00130//Ubiquinone and other terpenoid-quinone biosynthesis;ko00945//Stilbenoid, diarylheptanoid and gingerol biosynthesis	K00487;K00487;K00487;K00487;K00487;K00487	-	GO:0005506//iron ion binding;GO:0016705//oxidoreductase activity, acting on paired donors, with incorporation or reduction of molecular oxygen;GO:0020037//heme binding	GO:0055114//oxidation-reduction process
Mesophyll	SK1G00059590	SK1G00059590-PNC1	0.964031	6.15026	23989	15404	0.363	0.623	2.67336978092992	0	0	up	PNC1	EAY97930.1 hypothetical protein OsI_19846 [Oryza sativa Indica Group]	-	-	-	-	-	-	-
Mesophyll	SK1G00059620	cmbl	0.0589619	0.30195	23989	15404	0.031	0.136	2.35448995744035	0	0	up	cmbl	KAF0922958.1 hypothetical protein E2562_002187 [Oryza meyeriana var. granulata] [Oryza meyeriana]	-	-	-	-	GO:0005737//cytoplasm	GO:0003924//GTPase activity;GO:0005524//ATP binding;GO:0005525//GTP binding;GO:0008171//O-methyltransferase activity;GO:0008236//serine-type peptidase activity;GO:0016787//hydrolase activity;GO:0050097//methylaspartate mutase activity	GO:0006508//proteolysis;GO:0009102//biotin biosynthetic process;GO:0019069//viral capsid assembly;GO:0019670//anaerobic glutamate catabolic process;GO:0042254//ribosome biogenesis
Mesophyll	SK1G00059648	GIP2	2.38303	4.25452	23989	15404	0.577	0.655	0.836169244743329	0	0	up	GIP2	EAY97992.1 hypothetical protein OsI_19909 [Oryza sativa Indica Group]	-	-	-	-	-	-	-
Mesophyll	SK1G00066360	SK1G00066360-PLT5	11.8386	16.5313	23989	15404	0.935	0.967	0.481697536607599	0	0	up	PLT5	KAF2911827.1 hypothetical protein DAI22_11g209000 [Oryza sativa Japonica Group]	-	-	-	-	GO:0005887//integral component of plasma membrane;GO:0016021//integral component of membrane	GO:0008028//monocarboxylic acid transmembrane transporter activity;GO:0015238//drug transmembrane transporter activity;GO:0015295//solute:proton symporter activity;GO:0022857//transmembrane transporter activity;GO:0042910//xenobiotic transporter activity;GO:0051119//sugar transmembrane transporter activity	GO:0006810//transport;GO:0008643//carbohydrate transport;GO:0015718//monocarboxylic acid transport;GO:0015893//drug transport;GO:0042908//xenobiotic transport;GO:0055085//transmembrane transport
Mesophyll	SK1G00066389	SK1G00066389-TBT2	0.513688	1.69167	23989	15404	0.159	0.319	1.71928997036693	0	0	up	TBT2	XP_015615816.1 tryptamine benzoyltransferase 2 [Oryza sativa Japonica Group]	-	-	-	-	-	GO:0016747//transferase activity, transferring acyl groups other than amino-acyl groups	-
Mesophyll	SK1G00070377	SK1G00070377-At5g07830	8.79795	5.87104	23989	15404	0.914	0.815	-0.583544	0	0	down	At5g07830	EEC69565.1 hypothetical protein OsI_38868 [Oryza sativa Indica Group]	Metabolism;Metabolism	Global and overview maps;Glycan biosynthesis and metabolism	ko01100//Metabolic pathways;ko00531//Glycosaminoglycan degradation	K07964;K07964	GO:0016020//membrane	GO:0016798//hydrolase activity, acting on glycosyl bonds	-
Mesophyll	SK1G00071232	BC1L9	18.5968	10.2431	23989	15404	0.884	0.682	-0.860396	0	0	down	BC1L9	KAB8113178.1 hypothetical protein EE612_052108 [Oryza sativa]	-	-	-	-	GO:0031225//anchored component of membrane	-	GO:0010215//cellulose microfibril organization
Mesophyll	SK1G00071910	KLLA0C05324g	14.8675	10.3338	23989	15404	0.932	0.868	-0.52479	0	0	down	KLLA0C05324g	XP_015614040.1 probable glucan 1,3-beta-glucosidase A [Oryza sativa Japonica Group]	-	-	-	-	-	GO:0004553//hydrolase activity, hydrolyzing O-glycosyl compounds;GO:0030674//protein binding, bridging;GO:0051015//actin filament binding	GO:0071704//organic substance metabolic process
Mesophyll	SK1G00073504	SK1G00073504-RPPL1	2.43206	1.62203	23989	15404	0.637	0.409	-0.584345	0	0	down	RPPL1	EAZ44471.1 hypothetical protein OsJ_29088 [Oryza sativa Japonica Group]	-	-	-	-	-	GO:0005515//protein binding;GO:0043531//ADP binding	-
Mesophyll	SK1G00042250	GST4	9.08998	5.51141	23989	15404	0.72	0.628	-0.721846	4.68810136469763e-309	1.72653397059084e-304	down	GST4	XP_015622486.1 glutathione S-transferase 4 [Oryza sativa Japonica Group]	Metabolism;Metabolism	Global and overview maps;Metabolism of other amino acids	ko01100//Metabolic pathways;ko00480//Glutathione metabolism	K00799;K00799	-	GO:0005515//protein binding;GO:0016034//maleylacetoacetate isomerase activity	GO:0006559//L-phenylalanine catabolic process;GO:0006572//tyrosine catabolic process;GO:0006749//glutathione metabolic process
Mesophyll	SK1G00071716	OsI_032456	0.314245	1.07003	23989	15404	0.137	0.252	1.76737031852199	9.93539390971502e-294	3.65900686906985e-289	up	OsI_032456	A2Z7B3.1 RecName: Full=GDP-mannose 3,5-epimerase 1; Short=GDP-Man 3,5-epimerase 1; AltName: Full=OsGME-1 [Oryza sativa Indica Group]	Metabolism;Metabolism;Metabolism;Metabolism	Global and overview maps;Global and overview maps;Carbohydrate metabolism;Carbohydrate metabolism	ko01100//Metabolic pathways;ko01110//Biosynthesis of secondary metabolites;ko00520//Amino sugar and nucleotide sugar metabolism;ko00053//Ascorbate and aldarate metabolism	K10046;K10046;K10046;K10046	-	GO:0003824//catalytic activity;GO:0003854//3-beta-hydroxy-delta5-steroid dehydrogenase activity;GO:0003978//UDP-glucose 4-epimerase activity;GO:0004316//3-oxoacyl-[acyl-carrier-protein] reductase (NADPH) activity;GO:0008460//dTDP-glucose 4,6-dehydratase activity;GO:0008667//2,3-dihydro-2,3-dihydroxybenzoate dehydrogenase activity;GO:0008712//ADP-glyceromanno-heptose 6-epimerase activity;GO:000883…	GO:0005975//carbohydrate metabolic process;GO:0006012//galactose metabolic process;GO:0006633//fatty acid biosynthetic process;GO:0006694//steroid biosynthetic process;GO:0009243//O antigen biosynthetic process;GO:0009244//lipopolysaccharide core region biosynthetic process;GO:0019305//dTDP-rhamnose biosynthetic process;GO:0055114//oxidation-reduction process
Mesophyll	SK1G00068521	SK1G00068521	0.18832	0.710684	23989	15404	0.075	0.192	1.9154597430893	2.89638862864711e-292	1.06668200415816e-287	up	--	BAG91935.1 unnamed protein product [Oryza sativa Japonica Group]	-	-	-	-	-	-	-
Mesophyll	SK1G00054556	SK1G00054556	0.0893294	0.502982	23989	15404	0.03	0.121	2.49197409283425	4.59957261354896e-281	1.69393060211781e-276	up	--	CAJ86129.1 H0313F03.13 [Oryza sativa]	-	-	-	-	-	-	-
Mesophyll	SK1G00068228	SK1G00068228-OsI_35105	3.96898	2.44628	23989	15404	0.676	0.553	-0.698157	3.24104175027405e-275	1.19361085579093e-270	down	OsI_35105	XP_015616831.1 pyruvate kinase 1, cytosolic [Oryza sativa Japonica Group]	Metabolism;Metabolism;Metabolism;Metabolism;Metabolism;Metabolism;Metabolism	Global and overview maps;Global and overview maps;Global and overview maps;Global and overview maps;Carbohydrate metabolism;Nucleotide metabolism;Carbohydrate metabolism	ko01100//Metabolic pathways;ko01110//Biosynthesis of secondary metabolites;ko01200//Carbon metabolism;ko01230//Biosynthesis of amino acids;ko00010//Glycolysis / Gluconeogenesis;ko00230//Purine metabolism;ko00620//Pyruvate metabolism	K00873;K00873;K00873;K00873;K00873;K00873;K00873	GO:0005737//cytoplasm	GO:0000287//magnesium ion binding;GO:0004743//pyruvate kinase activity;GO:0008703//5-amino-6-(5-phosphoribosylamino)uracil reductase activity;GO:0030955//potassium ion binding	GO:0006096//glycolytic process;GO:0009231//riboflavin biosynthetic process;GO:0055114//oxidation-reduction process
Mesophyll	SK1G00043201	BBX22	2.07704	1.35167	23989	15404	0.578	0.403	-0.619752	1.621554506089e-267	5.97186093502458e-263	down	BBX22	XP_015630321.1 B-box zinc finger protein 22 [Oryza sativa Japonica Group]	-	-	-	-	-	GO:0008270//zinc ion binding	-
Mesophyll	SK1G00047173	GONST3	5.85287	4.17381	23989	15404	0.834	0.763	-0.48777	1.97639517325544e-263	7.27866814406515e-259	down	GONST3	XP_015631951.1 GDP-mannose transporter GONST3 isoform X2 [Oryza sativa Japonica Group]	-	-	-	-	GO:0016021//integral component of membrane	-	-
Mesophyll	SK1G00049167	GPX6	6.51336	9.30418	23989	15404	0.749	0.855	0.514470534292788	1.16239524953897e-258	4.28086922500212e-254	up	GPX6	EAY86982.1 hypothetical protein OsI_08376 [Oryza sativa Indica Group]	Metabolism;Metabolism;Metabolism	Global and overview maps;Metabolism of other amino acids;Lipid metabolism	ko01100//Metabolic pathways;ko00480//Glutathione metabolism;ko00590//Arachidonic acid metabolism	K00432;K00432;K00432	-	GO:0004602//glutathione peroxidase activity;GO:0016209//antioxidant activity;GO:0016491//oxidoreductase activity	GO:0006979//response to oxidative stress;GO:0055114//oxidation-reduction process
Mesophyll	SK1G00059967	RPL36C	8.07925	10.3142	23989	15404	0.916	0.947	0.35233159988951	1.84851414238265e-256	6.80770788356683e-252	up	RPL36C	XP_015640666.1 60S ribosomal protein L36-3 [Oryza sativa Japonica Group]	Genetic Information Processing	Translation	ko03010//Ribosome	K02920	GO:0005840//ribosome	GO:0003735//structural constituent of ribosome	GO:0006412//translation
Mesophyll	SK1G00047117	SK1G00047117-TLP1	9.70563	13.1706	23989	15404	0.894	0.942	0.440424813467879	3.84681401495962e-254	1.41670466542933e-249	up	TLP1	XP_015631808.1 thaumatin-like protein 1b isoform X1 [Oryza sativa Japonica Group]	-	-	-	-	-	-	-
Mesophyll	SK1G00073431	CAB1R	0.219961	0.819966	23989	15404	0.064	0.167	1.89783975530478	2.31125599269349e-244	8.5118935698916e-240	up	CAB1R	XP_015611833.1 chlorophyll a-b binding protein 1, chloroplastic [Oryza sativa Japonica Group]	Metabolism;Metabolism	Global and overview maps;Energy metabolism	ko01100//Metabolic pathways;ko00196//Photosynthesis - antenna proteins	K08912;K08912	-	-	-
Mesophyll	SK1G00064792	SK1G00064792-CCR3	8.7782	6.02279	23989	15404	0.803	0.717	-0.543484	1.25211980802085e-243	4.61130682897918e-239	down	CCR3	EAZ06794.1 hypothetical protein OsI_29039 [Oryza sativa Indica Group]	-	-	-	-	-	GO:0004672//protein kinase activity;GO:0005524//ATP binding	GO:0006468//protein phosphorylation
Mesophyll	SK1G00059646	FBA1	22.0092	28.1945	23989	15404	0.964	0.977	0.357308879961774	4.68034782014257e-235	1.7236784952021e-230	up	FBA1	XP_015639252.1 fructose-bisphosphate aldolase 1, cytoplasmic [Oryza sativa Japonica Group]	Metabolism;Metabolism;Metabolism;Metabolism;Metabolism;Metabolism;Metabolism;Metabolism	Global and overview maps;Global and overview maps;Global and overview maps;Global and overview maps;Carbohydrate metabolism;Energy metabolism;Carbohydrate metabolism;Carbohydrate metabolism	ko01100//Metabolic pathways;ko01110//Biosynthesis of secondary metabolites;ko01200//Carbon metabolism;ko01230//Biosynthesis of amino acids;ko00010//Glycolysis / Gluconeogenesis;ko00710//Carbon fixation in photosynthetic organisms;ko00051//Fructose and mannose metabolism;ko00030//Pentose phosphate pathway	K01623;K01623;K01623;K01623;K01623;K01623;K01623;K01623	-	GO:0004332//fructose-bisphosphate aldolase activity;GO:0050371//tyrosine phenol-lyase activity	GO:0006096//glycolytic process;GO:0006570//tyrosine metabolic process
Mesophyll	SK1G00056009	SK1G00056009-APCB1	1.90292	1.07067	23989	15404	0.463	0.319	-0.829636	2.95920337243643e-232	1.08981541800089e-227	down	APCB1	EAZ00454.1 hypothetical protein OsI_22475 [Oryza sativa Indica Group]	-	-	-	-	-	-	-
Mesophyll	SK1G00039448	SK1G00039448-VIT_06s0061g00120	2.12063	0.649675	23989	15404	0.212	0.1	-1.70655	5.42285845109624e-227	1.99713031036972e-222	down	VIT_06s0061g00120	EAY77172.1 hypothetical protein OsI_05142 [Oryza sativa Indica Group]	-	-	-	-	-	GO:0004553//hydrolase activity, hydrolyzing O-glycosyl compounds	GO:0005975//carbohydrate metabolic process
Mesophyll	SK1G00068455	FER1	7.05335	4.60661	23989	15404	0.742	0.641	-0.614592	3.00696850807378e-226	1.10740636215341e-221	down	FER1	AAM74942.1 ferritin [Oryza sativa Japonica Group]	-	-	-	-	-	GO:0008199//ferric iron binding;GO:0016491//oxidoreductase activity;GO:0046872//metal ion binding	GO:0055114//oxidation-reduction process
Mesophyll	SK1G00043339	SK1G00043339-PFK3	0.23241	0.579959	23989	15404	0.111	0.224	1.31890638753264	1.17734561708291e-223	4.33592843859293e-219	up	PFK3	XP_015621540.1 ATP-dependent 6-phosphofructokinase 6 [Oryza sativa Japonica Group]	Metabolism;Metabolism;Metabolism;Metabolism;Metabolism;Genetic Information Processing;Metabolism;Metabolism;Metabolism	Global and overview maps;Global and overview maps;Global and overview maps;Global and overview maps;Carbohydrate metabolism;Folding, sorting and degradation;Carbohydrate metabolism;Carbohydrate metabolism;Carbohydrate metabolism	ko01100//Metabolic pathways;ko01110//Biosynthesis of secondary metabolites;ko01200//Carbon metabolism;ko01230//Biosynthesis of amino acids;ko00010//Glycolysis / Gluconeogenesis;ko03018//RNA degradation;ko00051//Fructose and mannose metabolism;ko00052//Galactose metabolism;ko00030//Pentose phosphate pathway	K00850;K00850;K00850;K00850;K00850;K00850;K00850;K00850;K00850	GO:0005575//cellular_component	GO:0001727//lipid kinase activity;GO:0003872//6-phosphofructokinase activity;GO:0016301//kinase activity;GO:0016773//phosphotransferase activity, alcohol group as acceptor;GO:0047334//diphosphate-fructose-6-phosphate 1-phosphotransferase activity	GO:0006096//glycolytic process;GO:0008150//biological_process
Mesophyll	SK1G00050258	RPS15AA	3.55514	4.76892	23989	15404	0.739	0.827	0.423747511905498	5.91089366601259e-221	2.17686391931912e-216	up	RPS15AA	XP_006647300.1 PREDICTED: 40S ribosomal protein S15a-1 [Oryza brachyantha]	Genetic Information Processing	Translation	ko03010//Ribosome	K02957	GO:0005840//ribosome	GO:0003735//structural constituent of ribosome	GO:0006412//translation
Mesophyll	SK1G00045815	AOC	13.0208	18.5066	23989	15404	0.827	0.882	0.507218901670856	6.61665834414011e-219	2.43678293497992e-214	up	AOC	XP_015632351.1 allene oxide cyclase, chloroplastic [Oryza sativa Japonica Group]	Metabolism;Metabolism;Metabolism	Global and overview maps;Global and overview maps;Lipid metabolism	ko01100//Metabolic pathways;ko01110//Biosynthesis of secondary metabolites;ko00592//alpha-Linolenic acid metabolism	K10525;K10525;K10525	-	GO:0016853//isomerase activity	-
Mesophyll	SK1G00055351	SK1G00055351	3.28669	5.13965	23989	15404	0.596	0.666	0.645017593086612	9.30968980513726e-217	3.42857256143595e-212	up	--	XP_025882247.1 uncharacterized protein LOC4340124 [Oryza sativa Japonica Group]	-	-	-	-	GO:0005887//integral component of plasma membrane;GO:0043190//ATP-binding cassette (ABC) transporter complex	GO:0005524//ATP binding;GO:0042626//ATPase activity, coupled to transmembrane movement of substances	GO:0006810//transport
Mesophyll	SK1G00061238	BHLH062	0.493163	0.979209	23989	15404	0.202	0.327	0.989405859439284	7.24738175670179e-212	2.66906575335813e-207	up	BHLH062	EEC82500.1 hypothetical protein OsI_26965 [Oryza sativa Indica Group]	-	-	-	-	GO:0031514//motile cilium	GO:0043565//sequence-specific DNA binding;GO:0046983//protein dimerization activity	GO:0006355//regulation of transcription, DNA-templated;GO:0048870//cell motility
Mesophyll	SK1G00047852	SK1G00047852	1.0554	0.736202	23989	15404	0.405	0.259	-0.51955	2.45468747399432e-208	9.04012302922628e-204	down	--	AAK63886.1 Putative mudrA protein - maize transposon MuDR [Oryza sativa]	-	-	-	-	-	GO:0003677//DNA binding;GO:0004803//transposase activity;GO:0008270//zinc ion binding	GO:0006313//transposition, DNA-mediated
Mesophyll	SK1G00071264	MSBP2	2.4183	3.45019	23989	15404	0.636	0.698	0.512663352835856	1.08208529163975e-207	3.98510371205085e-203	up	MSBP2	XP_015614353.1 membrane steroid-binding protein 2-like [Oryza sativa Japonica Group]	-	-	-	-	GO:0005840//ribosome	GO:0003735//structural constituent of ribosome	GO:0006412//translation
Mesophyll	SK1G00066015	RPL37A	3.51341	4.72311	23989	15404	0.738	0.824	0.426853322908232	1.36052743277594e-205	5.01055042942724e-201	up	RPL37A	EEC82850.1 hypothetical protein OsI_27679 [Oryza sativa Indica Group]	Genetic Information Processing	Translation	ko03010//Ribosome	K02922	GO:0005840//ribosome	GO:0003735//structural constituent of ribosome;GO:0033743//peptide-methionine (R)-S-oxide reductase activity	GO:0006412//translation;GO:0055114//oxidation-reduction process
Mesophyll	SK1G00068418	SK1G00068418-MGLL	0.448263	0.857317	23989	15404	0.193	0.32	0.935329306757193	2.78357757761943e-204	1.02513595028568e-199	up	MGLL	EAY86137.1 hypothetical protein OsI_07510 [Oryza sativa Indica Group]	Metabolism;Metabolism	Global and overview maps;Lipid metabolism	ko01100//Metabolic pathways;ko00561//Glycerolipid metabolism	K01054;K01054	-	GO:0003824//catalytic activity;GO:0008236//serine-type peptidase activity;GO:0016787//hydrolase activity;GO:0047570//3-oxoadipate enol-lactonase activity;GO:0070205//2-succinyl-6-hydroxy-2,4-cyclohexadiene-1-carboxylate synthase activity	GO:0006508//proteolysis;GO:0009102//biotin biosynthetic process;GO:0009234//menaquinone biosynthetic process;GO:0042952//beta-ketoadipate pathway
Mesophyll	SK1G00049908	SK1G00049908	8.20951	3.5113	23989	15404	0.372	0.259	-1.22527	7.78337518667656e-204	2.86646141374924e-199	down	--	-	-	-	-	-	-	-	-
Mesophyll	SK1G00042818	SEC14	1.31066	0.909219	23989	15404	0.466	0.313	-0.527551	5.51760962222319e-203	2.03202527167236e-198	down	SEC14	KAF2949528.1 hypothetical protein DAI22_01g117600 [Oryza sativa Japonica Group]	-	-	-	-	-	-	-
Mesophyll	SK1G00042663	SK1G00042663	1.30984	0.694007	23989	15404	0.364	0.239	-0.916275	3.37569052603915e-202	1.2431993069297e-197	down	--	XP_015645493.1 uncharacterized protein LOC107278289 [Oryza sativa Japonica Group]	-	-	-	-	-	-	-
Mesophyll	SK1G00052169	CAS2	0.0722704	0.293057	23989	15404	0.037	0.113	2.0182	1.76496516384196e-199	6.50001370539716e-195	up	CAS2	AAV48542.1 beta-cyanoalanine synthase [Oryza sativa Indica Group]	Metabolism;Metabolism;Metabolism;Metabolism;Metabolism;Metabolism;Metabolism	Global and overview maps;Global and overview maps;Global and overview maps;Global and overview maps;Amino acid metabolism;Metabolism of other amino acids;Energy metabolism	ko01100//Metabolic pathways;ko01110//Biosynthesis of secondary metabolites;ko01200//Carbon metabolism;ko01230//Biosynthesis of amino acids;ko00270//Cysteine and methionine metabolism;ko00460//Cyanoamino acid metabolism;ko00920//Sulfur metabolism	K13034;K13034;K13034;K13034;K13034;K13034;K13034	-	GO:0004122//cystathionine beta-synthase activity;GO:0004124//cysteine synthase activity;GO:0004794//L-threonine ammonia-lyase activity;GO:0008838//diaminopropionate ammonia-lyase activity;GO:0030170//pyridoxal phosphate binding	GO:0006535//cysteine biosynthetic process from serine;GO:0006549//isoleucine metabolic process;GO:0008152//metabolic process;GO:0009058//biosynthetic process;GO:0009097//isoleucine biosynthetic process;GO:0019344//cysteine biosynthetic process;GO:0042400//ectoine catabolic process
Mesophyll	SK1G00070247	RPL8	4.59688	6.14544	23989	15404	0.763	0.836	0.418851755980056	4.28196977625101e-197	1.57696382919772e-192	up	RPL8	XP_015619844.1 60S ribosomal protein L8 [Oryza sativa Japonica Group]	Genetic Information Processing	Translation	ko03010//Ribosome	K02938	GO:0000315//organellar large ribosomal subunit;GO:0005840//ribosome;GO:0022625//cytosolic large ribosomal subunit	GO:0003735//structural constituent of ribosome	GO:0006412//translation
Mesophyll	SK1G00058380	SAM1	16.5441	12.0769	23989	15404	0.932	0.909	-0.454059	1.78238326403612e-196	6.56416108479222e-192	down	SAM1	XP_015638780.1 S-adenosylmethionine synthase 1 [Oryza sativa Japonica Group]	Metabolism;Metabolism;Metabolism;Metabolism	Global and overview maps;Global and overview maps;Global and overview maps;Amino acid metabolism	ko01100//Metabolic pathways;ko01110//Biosynthesis of secondary metabolites;ko01230//Biosynthesis of amino acids;ko00270//Cysteine and methionine metabolism	K00789;K00789;K00789;K00789	-	GO:0003677//DNA binding;GO:0004478//methionine adenosyltransferase activity;GO:0004803//transposase activity	GO:0006313//transposition, DNA-mediated;GO:0006556//S-adenosylmethionine biosynthetic process
Mesophyll	SK1G00069109	SK1G00069109-AAP3	0.717982	1.40366	23989	15404	0.201	0.327	0.967077431863588	3.1635804458997e-192	1.16508340661594e-187	up	AAP3	EEC68963.1 hypothetical protein OsI_37697 [Oryza sativa Indica Group]	-	-	-	-	-	-	-
Mesophyll	SK1G00070354	SK1G00070354-CYP81Q32	0.0707976	0.268649	23989	15404	0.032	0.105	1.92245212194416	3.37848381313428e-191	1.24422801870109e-186	up	CYP81Q32	XP_025877599.1 uncharacterized protein LOC9269725 [Oryza sativa Japonica Group]	-	-	-	-	-	GO:0005506//iron ion binding;GO:0016705//oxidoreductase activity, acting on paired donors, with incorporation or reduction of molecular oxygen;GO:0020037//heme binding;GO:0042626//ATPase activity, coupled to transmembrane movement of substances	GO:0044781//bacterial-type flagellum organization;GO:0055114//oxidation-reduction process
Mesophyll	SK1G00068517	LTP110-A	0.633547	0.305043	23989	15404	0.212	0.101	-1.05419	1.25788818554681e-190	4.6325506097318e-186	down	LTP110-A	XP_015615428.1 non-specific lipid-transfer protein 3 [Oryza sativa Japonica Group]	-	-	-	-	-	-	-
Mesophyll	SK1G00041600	SK1G00041600-TOGT1	1.70152	1.14076	23989	15404	0.455	0.307	-0.576783	2.14184924255548e-188	7.8880023904833e-184	down	TOGT1	XP_015621166.1 scopoletin glucosyltransferase [Oryza sativa Japonica Group]	Metabolism;Metabolism	Global and overview maps;Biosynthesis of other secondary metabolites	ko01110//Biosynthesis of secondary metabolites;ko00940//Phenylpropanoid biosynthesis	K23260;K23260	-	GO:0008194//UDP-glycosyltransferase activity	-
Mesophyll	SK1G00042317	SK1G00042317-RALF23	12.9085	10.3238	23989	15404	0.955	0.935	-0.322346	8.47599100616464e-188	3.12153796775031e-183	down	RALF23	XP_015688641.1 PREDICTED: rapid alkalinization factor-like, partial [Oryza brachyantha]	-	-	-	-	-	-	-
Mesophyll	SK1G00070977	SK1G00070977	30.2222	24.9176	23989	15404	0.979	0.961	-0.278443	2.93692810869807e-185	1.08161188387132e-180	down	--	EAY79339.1 hypothetical protein OsI_34469 [Oryza sativa Indica Group]	-	-	-	-	-	-	-
Mesophyll	SK1G00055352	MKK2	2.40967	1.74288	23989	15404	0.609	0.469	-0.467336	1.02781518271103e-181	3.78523775488817e-177	down	MKK2	XP_015644525.1 mitogen-activated protein kinase kinase 2 [Oryza sativa Japonica Group]	Environmental Information Processing	Signal transduction	ko04016//MAPK signaling pathway - plant	K20603	-	GO:0004672//protein kinase activity;GO:0005524//ATP binding	GO:0006468//protein phosphorylation
Mesophyll	SK1G00060298	SK1G00060298-NADKC	0.0704041	0.232317	23989	15404	0.034	0.106	1.72093299624256	1.33275509220076e-180	4.90827045355695e-176	up	NADKC	XP_015639860.1 uncharacterized protein LOC4339269 isoform X2 [Oryza sativa Japonica Group]	-	-	-	-	-	GO:0003924//GTPase activity;GO:0005524//ATP binding;GO:0016301//kinase activity	-
Mesophyll	SK1G00058208	Os05g0125500	2.2352	3.13096	23989	15404	0.582	0.684	0.486179798868773	4.48874384412918e-165	1.65311458291589e-160	up	Os05g0125500	OEL38099.1 Isovaleryl-CoA dehydrogenase, mitochondrial [Dichanthelium oligosanthes]	Metabolism;Metabolism	Global and overview maps;Amino acid metabolism	ko01100//Metabolic pathways;ko00280//Valine, leucine and isoleucine degradation	K00253;K00253	-	GO:0016491//oxidoreductase activity;GO:0016627//oxidoreductase activity, acting on the CH-CH group of donors;GO:0018515//pimeloyl-CoA dehydrogenase activity	GO:0006790//sulfur compound metabolic process;GO:0055114//oxidation-reduction process
Mesophyll	SK1G00057018	Os06g0561000	1.51754	2.68699	23989	15404	0.234	0.357	0.824216827386572	2.14993934436985e-161	7.91779661744529e-157	up	Os06g0561000	XP_015643978.1 probable inositol oxygenase [Oryza sativa Japonica Group]	Metabolism;Metabolism;Metabolism	Global and overview maps;Carbohydrate metabolism;Carbohydrate metabolism	ko01100//Metabolic pathways;ko00562//Inositol phosphate metabolism;ko00053//Ascorbate and aldarate metabolism	K00469;K00469;K00469	GO:0005737//cytoplasm	GO:0004521//endoribonuclease activity;GO:0005506//iron ion binding;GO:0050113//inositol oxygenase activity	GO:0019310//inositol catabolic process;GO:0043571//maintenance of CRISPR repeat elements;GO:0055114//oxidation-reduction process
Mesophyll	SK1G00048703	GLN1-1	20.52	16.4456	23989	15404	0.939	0.898	-0.319328	3.57013596594649e-161	1.31480967353877e-156	down	GLN1-1	XP_015626102.1 glutamine synthetase cytosolic isozyme 1-1 [Oryza sativa Japonica Group]	Metabolism;Metabolism;Metabolism;Metabolism;Metabolism;Metabolism	Global and overview maps;Global and overview maps;Carbohydrate metabolism;Amino acid metabolism;Amino acid metabolism;Energy metabolism	ko01100//Metabolic pathways;ko01230//Biosynthesis of amino acids;ko00630//Glyoxylate and dicarboxylate metabolism;ko00250//Alanine, aspartate and glutamate metabolism;ko00220//Arginine biosynthesis;ko00910//Nitrogen metabolism	K01915;K01915;K01915;K01915;K01915;K01915	-	GO:0004356//glutamate-ammonia ligase activity	GO:0006542//glutamine biosynthetic process;GO:0006807//nitrogen compound metabolic process
Mesophyll	SK1G00059853	SK1G00059853-ACT1	5.46818	3.99956	23989	15404	0.755	0.682	-0.451207	5.09157114085722e-159	1.8751238197549e-154	down	ACT1	XP_015639713.1 actin-1 [Oryza sativa Japonica Group]	-	-	-	-	-	-	-
Mesophyll	SK1G00059861	SK1G00059861	0.831271	1.37736	23989	15404	0.301	0.399	0.728441740724888	1.07142505668123e-157	3.94584419874563e-153	up	--	XP_015640135.1 uncharacterized protein LOC9270028 isoform X3 [Oryza sativa Japonica Group]	-	-	-	-	-	-	-
Mesophyll	SK1G00060627	SK1G00060627-RPL18A	1.30692	1.89648	23989	15404	0.433	0.547	0.537122339689936	3.38716297439551e-157	1.24742438021038e-152	up	RPL18A	XP_015639994.1 60S ribosomal protein L18a-like [Oryza sativa Japonica Group]	Genetic Information Processing	Translation	ko03010//Ribosome	K02882	GO:0005840//ribosome	GO:0003735//structural constituent of ribosome	GO:0006412//translation
Mesophyll	SK1G00048183	DESI1	7.34559	5.67108	23989	15404	0.872	0.821	-0.37325	4.62832449534565e-157	1.7045193451459e-152	down	DESI1	KAB8089469.1 hypothetical protein EE612_014428 [Oryza sativa]	-	-	-	-	-	GO:0008233//peptidase activity	-
Mesophyll	SK1G00042746	SK1G00042746-RPL30	2.6661	3.51077	23989	15404	0.668	0.759	0.397044113568257	1.42873428712893e-156	5.26174263263841e-152	up	RPL30	XP_015622112.1 60S ribosomal protein L30 [Oryza sativa Japonica Group]	Genetic Information Processing	Translation	ko03010//Ribosome	K02908	-	-	-
Mesophyll	SK1G00050737	SK1G00050737-RPS3A	0.704407	1.10701	23989	15404	0.293	0.416	0.652113380978248	2.51254383721154e-156	9.25319644368265e-152	up	RPS3A	XP_015627368.1 40S ribosomal protein S3a-like [Oryza sativa Japonica Group]	Genetic Information Processing	Translation	ko03010//Ribosome	K02984	GO:0005840//ribosome	GO:0003690//double-stranded DNA binding;GO:0003735//structural constituent of ribosome	GO:0006355//regulation of transcription, DNA-templated;GO:0006412//translation
Mesophyll	SK1G00047804	SK1G00047804	10.259	8.27315	23989	15404	0.923	0.889	-0.310384	6.02549213199275e-155	2.21906824237029e-150	down	--	XP_015632654.1 uncharacterized protein LOC9267662 isoform X1 [Oryza sativa Japonica Group]	-	-	-	-	-	GO:0003674//molecular_function;GO:0047570//3-oxoadipate enol-lactonase activity;GO:0070205//2-succinyl-6-hydroxy-2,4-cyclohexadiene-1-carboxylate synthase activity	GO:0009234//menaquinone biosynthetic process;GO:0015979//photosynthesis;GO:0042952//beta-ketoadipate pathway
Mesophyll	SK1G00040288	NAC068	3.44002	4.75059	23989	15404	0.562	0.675	0.465678077799497	4.29192243181391e-149	1.58062919318843e-144	up	NAC068	EAY76267.1 hypothetical protein OsI_04203 [Oryza sativa Indica Group]	-	-	-	-	-	GO:0003677//DNA binding	GO:0006355//regulation of transcription, DNA-templated
Mesophyll	SK1G00043952	SK1G00043952-CNR10	52.1882	43.4491	23989	15404	0.994	0.989	-0.264399	3.39235437115037e-147	1.24933626780726e-142	down	CNR10	XP_015629327.1 cell number regulator 10 [Oryza sativa Japonica Group]	-	-	-	-	GO:0016021//integral component of membrane	GO:0004252//serine-type endopeptidase activity	-
Mesophyll	SK1G00068535	SK1G00068535-LTP110-A	1.74371	2.82164	23989	15404	0.399	0.491	0.694344089716856	2.36493325510166e-144	8.70957619188839e-140	up	LTP110-A	XP_015615428.1 non-specific lipid-transfer protein 3 [Oryza sativa Japonica Group]	-	-	-	-	-	-	-
Mesophyll	SK1G00055507	SK1G00055507-GW2	1.44124	1.07625	23989	15404	0.518	0.386	-0.421266	2.94406573133478e-143	1.08424052753597e-138	down	GW2	XP_015642899.1 E3 ubiquitin-protein ligase GW2 [Oryza sativa Japonica Group]	-	-	-	-	-	GO:0015036//disulfide oxidoreductase activity	GO:0055114//oxidation-reduction process
Mesophyll	SK1G00056911	SK1G00056911-PER52	41.7021	30.6018	23989	15404	0.919	0.888	-0.4465	1.02305276342248e-142	3.76769871713232e-138	down	PER52	XP_015643864.1 peroxidase P7 [Oryza sativa Japonica Group]	Metabolism;Metabolism;Metabolism	Global and overview maps;Global and overview maps;Biosynthesis of other secondary metabolites	ko01100//Metabolic pathways;ko01110//Biosynthesis of secondary metabolites;ko00940//Phenylpropanoid biosynthesis	K00430;K00430;K00430	-	GO:0004601//peroxidase activity;GO:0020037//heme binding	GO:0006979//response to oxidative stress;GO:0055114//oxidation-reduction process
Mesophyll	SK1G00055652	OPR2	25.4983	20.7885	23989	15404	0.953	0.938	-0.29461	2.41037189598137e-142	8.87691761852019e-138	down	OPR2	EAZ00152.1 hypothetical protein OsI_22158 [Oryza sativa Indica Group]	Metabolism;Metabolism;Metabolism	Global and overview maps;Global and overview maps;Lipid metabolism	ko01100//Metabolic pathways;ko01110//Biosynthesis of secondary metabolites;ko00592//alpha-Linolenic acid metabolism	K05894;K05894;K05894	GO:0005886//plasma membrane	GO:0010181//FMN binding;GO:0015221//lipopolysaccharide transmembrane transporter activity;GO:0016491//oxidoreductase activity;GO:0016758//transferase activity, transferring hexosyl groups	GO:0005975//carbohydrate metabolic process;GO:0015920//lipopolysaccharide transport;GO:0030259//lipid glycosylation;GO:0055114//oxidation-reduction process
Mesophyll	SK1G00048223	Os02g0806900	5.53749	4.23648	23989	15404	0.788	0.73	-0.38636	2.92316839071329e-142	1.07654445493189e-137	down	Os02g0806900	EAY87933.1 hypothetical protein OsI_09357 [Oryza sativa Indica Group]	Metabolism;Metabolism	Global and overview maps;Lipid metabolism	ko01100//Metabolic pathways;ko00600//Sphingolipid metabolism	K00654;K00654	-	GO:0003824//catalytic activity;GO:0003870//5-aminolevulinate synthase activity;GO:0008710//8-amino-7-oxononanoate synthase activity;GO:0008890//glycine C-acetyltransferase activity;GO:0018826//methionine gamma-lyase activity;GO:0030170//pyridoxal phosphate binding	GO:0006567//threonine catabolic process;GO:0006783//heme biosynthetic process;GO:0009058//biosynthetic process;GO:0009087//methionine catabolic process;GO:0009093//cysteine catabolic process;GO:0009102//biotin biosynthetic process;GO:0019346//transsulfuration
Mesophyll	SK1G00060480	SK1G00060480-RPL28A	1.52331	2.08641	23989	15404	0.488	0.595	0.453782261396403	3.3251421937619e-136	1.22458336711863e-131	up	RPL28A	XP_006654725.2 PREDICTED: 60S ribosomal protein L28-1-like [Oryza brachyantha]	Genetic Information Processing	Translation	ko03010//Ribosome	K02903	-	-	-
Mesophyll	SK1G00059783	ZB8	3.63037	2.47842	23989	15404	0.593	0.513	-0.550678	7.78293191624271e-135	2.86629816611387e-130	down	ZB8	XP_015640196.1 phenylalanine ammonia-lyase [Oryza sativa Japonica Group]	Metabolism;Metabolism;Metabolism;Metabolism	Global and overview maps;Global and overview maps;Biosynthesis of other secondary metabolites;Amino acid metabolism	ko01100//Metabolic pathways;ko01110//Biosynthesis of secondary metabolites;ko00940//Phenylpropanoid biosynthesis;ko00360//Phenylalanine metabolism	K10775;K10775;K10775;K10775	-	GO:0004397//histidine ammonia-lyase activity;GO:0016841//ammonia-lyase activity;GO:0050368//tyrosine 2,3-aminomutase activity	GO:0006548//histidine catabolic process;GO:0009058//biosynthetic process;GO:0009698//phenylpropanoid metabolic process
Mesophyll	SK1G00040471	ULT1	1.98345	1.39687	23989	15404	0.521	0.412	-0.505785	4.30128775238736e-132	1.58407825344922e-127	down	ULT1	XP_015621397.1 protein ULTRAPETALA 1 [Oryza sativa Japonica Group]	-	-	-	-	-	GO:0003677//DNA binding	-
Mesophyll	SK1G00045758	FAX5	1.5818	2.11946	23989	15404	0.522	0.625	0.422109943078108	9.42649939079112e-131	3.47159119564055e-126	up	FAX5	EAZ27528.1 hypothetical protein OsJ_11482 [Oryza sativa Japonica Group]	-	-	-	-	GO:0016020//membrane	-	-
Mesophyll	SK1G00056187	SK1G00056187-KCR1	0.385023	0.201775	23989	15404	0.177	0.091	-0.931857	3.23650043315411e-130	1.191938379522e-125	down	KCR1	XP_015642753.1 very-long-chain 3-oxoacyl-CoA reductase 1 isoform X2 [Oryza sativa Japonica Group]	-	-	-	-	-	GO:0004316//3-oxoacyl-[acyl-carrier-protein] reductase (NADPH) activity;GO:0004488//methylenetetrahydrofolate dehydrogenase (NADP+) activity;GO:0004757//sepiapterin reductase activity;GO:0008667//2,3-dihydro-2,3-dihydroxybenzoate dehydrogenase activity;GO:0008678//2-deoxy-D-gluconate 3-dehydrogenase activity;GO:0016491//oxidoreductase activity;GO:0016630//protochlorophyllide reductase activity;GO…	GO:0000272//polysaccharide catabolic process;GO:0006631//fatty acid metabolic process;GO:0006633//fatty acid biosynthetic process;GO:0006729//tetrahydrobiopterin biosynthetic process;GO:0009228//thiamine biosynthetic process;GO:0015995//chlorophyll biosynthetic process;GO:0019068//virion assembly;GO:0055114//oxidation-reduction process
Mesophyll	SK1G00041477	ERI2	0.105891	0.258496	23989	15404	0.049	0.116	1.28675573871079	1.3100657745233e-129	4.82471023441441e-125	up	ERI2	EAY74980.1 hypothetical protein OsI_02878 [Oryza sativa Indica Group]	-	-	-	-	GO:0009360//DNA polymerase III complex	GO:0003887//DNA-directed DNA polymerase activity;GO:0004527//exonuclease activity;GO:0008026//ATP-dependent helicase activity	GO:0006260//DNA replication
Mesophyll	SK1G00060715	SK1G00060715	4.56903	3.50633	23989	15404	0.746	0.676	-0.381915	7.38359328246363e-128	2.71922973406571e-123	down	--	XP_015638039.1 uncharacterized protein LOC4339695 [Oryza sativa Japonica Group]	-	-	-	-	-	-	-
Mesophyll	SK1G00039702	FBA3	8.20123	5.79153	23989	15404	0.726	0.647	-0.501888	9.03989789321905e-128	3.32921359611471e-123	down	FBA3	XP_015613809.1 fructose-bisphosphate aldolase 3, cytoplasmic [Oryza sativa Japonica Group]	Metabolism;Metabolism;Metabolism;Metabolism;Metabolism;Metabolism;Metabolism;Metabolism	Global and overview maps;Global and overview maps;Global and overview maps;Global and overview maps;Carbohydrate metabolism;Energy metabolism;Carbohydrate metabolism;Carbohydrate metabolism	ko01100//Metabolic pathways;ko01110//Biosynthesis of secondary metabolites;ko01200//Carbon metabolism;ko01230//Biosynthesis of amino acids;ko00010//Glycolysis / Gluconeogenesis;ko00710//Carbon fixation in photosynthetic organisms;ko00051//Fructose and mannose metabolism;ko00030//Pentose phosphate pathway	K01623;K01623;K01623;K01623;K01623;K01623;K01623;K01623	-	GO:0004332//fructose-bisphosphate aldolase activity;GO:0050371//tyrosine phenol-lyase activity	GO:0006096//glycolytic process;GO:0006570//tyrosine metabolic process
Mesophyll	SK1G00066642	SK1G00066642	0.908639	0.709349	23989	15404	0.356	0.249	-0.357167	9.1764037697677e-127	3.37948598033005e-122	down	--	XP_015616319.1 uncharacterized protein LOC4350847 [Oryza sativa Japonica Group]	-	-	-	-	-	-	-
Mesophyll	SK1G00050148	RPL35	1.83234	2.46947	23989	15404	0.531	0.634	0.43049587245056	2.28601836436278e-126	8.41894843227525e-122	up	RPL35	XP_015627286.1 60S ribosomal protein L35 [Oryza sativa Japonica Group]	Genetic Information Processing	Translation	ko03010//Ribosome	K02918	GO:0000315//organellar large ribosomal subunit;GO:0005840//ribosome;GO:0022625//cytosolic large ribosomal subunit	GO:0003735//structural constituent of ribosome	GO:0006412//translation
Mesophyll	SK1G00065947	RPP1A	4.58865	5.71309	23989	15404	0.779	0.837	0.316194861390167	1.33059461013721e-125	4.90031383021331e-121	up	RPP1A	KAF2917825.1 hypothetical protein DAI22_08g012100 [Oryza sativa Japonica Group]	Genetic Information Processing	Translation	ko03010//Ribosome	K02942	-	-	GO:0009291//unidirectional conjugation
Mesophyll	SK1G00071132	SK1G00071132	3.44356	2.5594	23989	15404	0.678	0.601	-0.428085	1.61344406974149e-122	5.94199182004396e-118	down	--	XP_015612918.2 uncharacterized protein LOC4349144 isoform X1 [Oryza sativa Japonica Group]	-	-	-	-	-	GO:0003674//molecular_function;GO:0047570//3-oxoadipate enol-lactonase activity;GO:0070205//2-succinyl-6-hydroxy-2,4-cyclohexadiene-1-carboxylate synthase activity	GO:0009234//menaquinone biosynthetic process;GO:0015979//photosynthesis;GO:0042952//beta-ketoadipate pathway
Mesophyll	SK1G00053082	sll0608	0.314767	0.158931	23989	15404	0.151	0.074	-0.98543	9.96155298553386e-122	3.66864073351241e-117	down	sll0608	XP_015635648.1 uncharacterized protein LOC4335622 isoform X3 [Oryza sativa Japonica Group]	-	-	-	-	-	-	-
Mesophyll	SK1G00045408	Os03g0617900	21.4295	17.2246	23989	15404	0.949	0.925	-0.315127	1.74876915363198e-121	6.44036703899584e-117	down	Os03g0617900	EEC75742.1 hypothetical protein OsI_12624 [Oryza sativa Indica Group]	Metabolism;Metabolism;Metabolism;Metabolism;Metabolism	Global and overview maps;Global and overview maps;Global and overview maps;Global and overview maps;Amino acid metabolism	ko01100//Metabolic pathways;ko01110//Biosynthesis of secondary metabolites;ko01230//Biosynthesis of amino acids;ko01210//2-Oxocarboxylic acid metabolism;ko00220//Arginine biosynthesis	K00145;K00145;K00145;K00145;K00145	-	GO:0003824//catalytic activity;GO:0003942//N-acetyl-gamma-glutamyl-phosphate reductase activity;GO:0004073//aspartate-semialdehyde dehydrogenase activity;GO:0008839//4-hydroxy-tetrahydrodipicolinate reductase;GO:0016491//oxidoreductase activity;GO:0016620//oxidoreductase activity, acting on the aldehyde or oxo group of donors, NAD or NADP as acceptor;GO:0046983//protein dimerization activity;GO:0…	GO:0006592//ornithine biosynthetic process;GO:0006813//potassium ion transport;GO:0008652//cellular amino acid biosynthetic process;GO:0009086//methionine biosynthetic process;GO:0009088//threonine biosynthetic process;GO:0009089//lysine biosynthetic process via diaminopimelate;GO:0009097//isoleucine biosynthetic process;GO:0055114//oxidation-reduction process
Mesophyll	SK1G00059196	mrnC	0.526909	0.323323	23989	15404	0.217	0.126	-0.704405	4.77927953492348e-121	1.76011306712162e-116	down	mrnC	XP_015638109.1 uncharacterized protein LOC4338401 [Oryza sativa Japonica Group]	-	-	-	-	-	GO:0004525//ribonuclease III activity	GO:0006396//RNA processing
Mesophyll	SK1G00067901	ADH2	1.06984	0.453864	23989	15404	0.187	0.109	-1.23688	8.28666447757179e-120	3.05181279380014e-115	down	ADH2	XP_015616854.1 alcohol dehydrogenase 2 [Oryza sativa Japonica Group]	Metabolism;Metabolism;Metabolism;Metabolism;Metabolism;Metabolism	Global and overview maps;Global and overview maps;Carbohydrate metabolism;Lipid metabolism;Lipid metabolism;Amino acid metabolism	ko01100//Metabolic pathways;ko01110//Biosynthesis of secondary metabolites;ko00010//Glycolysis / Gluconeogenesis;ko00592//alpha-Linolenic acid metabolism;ko00071//Fatty acid degradation;ko00350//Tyrosine metabolism	K18857;K18857;K18857;K18857;K18857;K18857	-	GO:0004024//alcohol dehydrogenase activity, zinc-dependent;GO:0008270//zinc ion binding;GO:0008743//L-threonine 3-dehydrogenase activity;GO:0016491//oxidoreductase activity;GO:0016616//oxidoreductase activity, acting on the CH-OH group of donors, NAD or NADP as acceptor;GO:0016655//oxidoreductase activity, acting on NAD(P)H, quinone or similar compound as acceptor;GO:0018467//formaldehyde dehydro…	GO:0006113//fermentation;GO:0006567//threonine catabolic process;GO:0006813//potassium ion transport;GO:0008152//metabolic process;GO:0009404//toxin metabolic process;GO:0010127//mycothiol-dependent detoxification;GO:0019439//aromatic compound catabolic process;GO:0030494//bacteriochlorophyll biosynthetic process;GO:0046292//formaldehyde metabolic process;GO:0055114//oxidation-reduction process
Mesophyll	SK1G00066145	SK1G00066145-RIXI	3.5285	2.61337	23989	15404	0.677	0.6	-0.433131	1.83264098613507e-119	6.74925022373825e-115	down	RIXI	EAY81882.1 hypothetical protein OsI_37046 [Oryza sativa Indica Group]	Metabolism;Metabolism	Global and overview maps;Carbohydrate metabolism	ko01100//Metabolic pathways;ko00520//Amino sugar and nucleotide sugar metabolism	K01183;K01183	-	-	GO:0005975//carbohydrate metabolic process
Mesophyll	SK1G00061205	DAHPS2	31.4644	25.9477	23989	15404	0.974	0.961	-0.278114	3.03233155828359e-119	1.11674706628468e-114	down	DAHPS2	XP_015646378.1 phospho-2-dehydro-3-deoxyheptonate aldolase 2, chloroplastic [Oryza sativa Japonica Group]	Metabolism;Metabolism;Metabolism;Metabolism	Global and overview maps;Global and overview maps;Global and overview maps;Amino acid metabolism	ko01100//Metabolic pathways;ko01110//Biosynthesis of secondary metabolites;ko01230//Biosynthesis of amino acids;ko00400//Phenylalanine, tyrosine and tryptophan biosynthesis	K01626;K01626;K01626;K01626	-	GO:0003849//3-deoxy-7-phosphoheptulonate synthase activity	GO:0009073//aromatic amino acid family biosynthetic process;GO:0009423//chorismate biosynthetic process
Mesophyll	SK1G00067349	SK1G00067349-RPL38A	1.49335	2.03472	23989	15404	0.459	0.566	0.446250564663479	4.78105017345345e-119	1.76076515787944e-114	up	RPL38A	XP_015617721.1 60S ribosomal protein L38 [Oryza sativa Japonica Group]	Genetic Information Processing	Translation	ko03010//Ribosome	K02923	GO:0005840//ribosome	GO:0003735//structural constituent of ribosome	GO:0006412//translation
Mesophyll	SK1G00060461	NAP1;2	5.2867	6.41208	23989	15404	0.836	0.888	0.278419372768187	1.47097125513676e-118	5.41729293841767e-114	up	NAP1;2	XP_015639209.1 nucleosome assembly protein 1;2 [Oryza sativa Japonica Group]	-	-	-	-	GO:0005634//nucleus	GO:0051082//unfolded protein binding	GO:0006334//nucleosome assembly
Mesophyll	SK1G00071482	SK1G00071482	2.80986	3.80725	23989	15404	0.622	0.693	0.438240918667351	2.92995722614162e-118	1.07904464724344e-113	up	--	EEC67122.1 hypothetical protein OsI_33929 [Oryza sativa Indica Group]	-	-	-	-	-	-	-
Mesophyll	SK1G00067968	SK1G00067968	1.58561	2.1309	23989	15404	0.511	0.605	0.426406152899984	9.32857134285341e-118	3.43552625414605e-113	up	--	-	-	-	-	-	-	-	-
Mesophyll	SK1G00062178	SK1G00062178	0.499061	0.822334	23989	15404	0.13	0.22	0.720393558618628	3.61119847831905e-117	1.32993217559534e-112	up	--	BAG97793.1 unnamed protein product [Oryza sativa Japonica Group]	-	-	-	-	-	-	-
Mesophyll	SK1G00046645	SK1G00046645-MYB2	1.55164	2.15058	23989	15404	0.304	0.418	0.470912648296468	3.98544580439933e-117	1.46775998084419e-112	up	MYB2	EAY89765.1 hypothetical protein OsI_11306 [Oryza sativa Indica Group]	-	-	-	-	-	-	-
Mesophyll	SK1G00047139	NRP1	0.207393	0.400015	23989	15404	0.101	0.18	0.947352018015055	5.48785622527179e-114	2.02106769064309e-109	up	NRP1	XP_015632941.1 glycine-rich cell wall structural protein 1.8 [Oryza sativa Japonica Group]	-	-	-	-	-	-	-
Mesophyll	SK1G00061081	SK1G00061081-PRX112	4.57811	3.18444	23989	15404	0.544	0.441	-0.523702	1.0988985130179e-112	4.04702344374233e-108	down	PRX112	EEC82681.1 hypothetical protein OsI_27325 [Oryza sativa Indica Group]	Metabolism;Metabolism;Metabolism	Global and overview maps;Global and overview maps;Biosynthesis of other secondary metabolites	ko01100//Metabolic pathways;ko01110//Biosynthesis of secondary metabolites;ko00940//Phenylpropanoid biosynthesis	K00430;K00430;K00430	-	GO:0004601//peroxidase activity;GO:0020037//heme binding	GO:0006979//response to oxidative stress;GO:0055114//oxidation-reduction process
Mesophyll	SK1G00052880	Os04g0339400	0.175628	0.481257	23989	15404	0.045	0.102	1.45376696942237	1.74576867035522e-111	6.42931685918419e-107	up	Os04g0339400	XP_015634128.1 probable aldo-keto reductase 3 [Oryza sativa Japonica Group]	-	-	-	-	-	GO:0047834//D-threo-aldose 1-dehydrogenase activity	-
Mesophyll	SK1G00057897	SK1G00057897-Dcaf8	0.942594	0.645054	23989	15404	0.331	0.227	-0.547146	6.76417612907043e-111	2.49111078481406e-106	down	Dcaf8	EEC81328.1 hypothetical protein OsI_24502 [Oryza sativa Indica Group]	-	-	-	-	-	GO:0005515//protein binding	-
Mesophyll	SK1G00047790	SK1G00047790	1.50745	2.206	23989	15404	0.427	0.498	0.549289475829572	9.08272007732636e-111	3.34498415007775e-106	up	--	ACT78555.1 HRL protein [Oryza sativa Japonica Group]	-	-	-	-	-	-	-
Mesophyll	SK1G00046894	SK1G00046894-HSP70	29.9185	24.5539	23989	15404	0.981	0.978	-0.285082	4.36997547531699e-110	1.60937456804974e-105	down	HSP70	XP_015630538.1 heat shock cognate 70 kDa protein 2 [Oryza sativa Japonica Group]	Genetic Information Processing;Genetic Information Processing;Cellular Processes	Folding, sorting and degradation;Transcription;Transport and catabolism	ko04141//Protein processing in endoplasmic reticulum;ko03040//Spliceosome;ko04144//Endocytosis	K03283;K03283;K03283	-	GO:0004856//xylulokinase activity;GO:0005515//protein binding;GO:0005524//ATP binding;GO:0016773//phosphotransferase activity, alcohol group as acceptor;GO:0016787//hydrolase activity;GO:0016887//ATPase activity;GO:0051082//unfolded protein binding	GO:0005975//carbohydrate metabolic process;GO:0005997//xylulose metabolic process;GO:0006457//protein folding;GO:0006950//response to stress;GO:0008360//regulation of cell shape;GO:0042732//D-xylose metabolic process;GO:0043093//FtsZ-dependent cytokinesis
Mesophyll	SK1G00067753	TUBA	2.35518	3.03427	23989	15404	0.617	0.689	0.36549746867444	7.0352936392446e-110	2.590957941461e-105	up	TUBA	ABG78593.1 alpha-tubulin [Oryza sativa Japonica Group]	Cellular Processes	Transport and catabolism	ko04145//Phagosome	K07374	-	GO:0003924//GTPase activity	GO:0000910//cytokinesis
Mesophyll	SK1G00045496	SK1G00045496	3.22087	3.90588	23989	15404	0.756	0.808	0.278188092907909	5.27562046897424e-109	1.94290550631383e-104	up	--	EAY90941.1 hypothetical protein OsI_12555 [Oryza sativa Indica Group]	-	-	-	-	-	-	-
Mesophyll	SK1G00050964	SK1G00050964	6.94631	8.48602	23989	15404	0.845	0.886	0.28883793351945	5.43324499515645e-109	2.00095546681622e-104	up	--	BAA33815.1 early nodulin [Oryza sativa Japonica Group]	-	-	-	-	-	-	-
Mesophyll	SK1G00043148	TAX1	11.7421	9.66736	23989	15404	0.927	0.899	-0.28049	1.27466373952531e-108	4.69433161992381e-104	down	TAX1	XP_015648126.1 uncharacterized protein LOC4325256 [Oryza sativa Japonica Group]	-	-	-	-	-	-	-
Mesophyll	SK1G00058053	SK1G00058053	1.14893	0.70435	23989	15404	0.331	0.242	-0.705847	4.44398350898969e-108	1.63663024669072e-103	down	--	EAY96282.1 hypothetical protein OsI_18180 [Oryza sativa Indica Group]	-	-	-	-	-	-	-
Mesophyll	SK1G00055435	RAP2-9	1.61481	2.26342	23989	15404	0.29	0.397	0.487109049027745	7.68461669855996e-107	2.83009063774566e-102	up	RAP2-9	XP_015641200.1 ethylene-responsive transcription factor RAP2-9 [Oryza sativa Japonica Group]	-	-	-	-	-	GO:0003700//transcription factor activity, sequence-specific DNA binding	GO:0006355//regulation of transcription, DNA-templated
Mesophyll	SK1G00060704	SK1G00060704-KCS11	5.25392	7.00894	23989	15404	0.678	0.751	0.415794786478506	1.29480018636849e-106	4.76849012635788e-102	up	KCS11	EAY99126.1 hypothetical protein OsI_21086 [Oryza sativa Indica Group]	Metabolism;Metabolism;Organismal Systems;Metabolism	Global and overview maps;Global and overview maps;Environmental adaptation;Lipid metabolism	ko01100//Metabolic pathways;ko01110//Biosynthesis of secondary metabolites;ko04626//Plant-pathogen interaction;ko00062//Fatty acid elongation	K15397;K15397;K15397;K15397	GO:0016020//membrane	GO:0003723//RNA binding;GO:0003724//RNA helicase activity;GO:0003924//GTPase activity;GO:0004315//3-oxoacyl-[acyl-carrier-protein] synthase activity;GO:0005525//GTP binding;GO:0016747//transferase activity, transferring acyl groups other than amino-acyl groups	GO:0006633//fatty acid biosynthetic process
Mesophyll	SK1G00050491	SK1G00050491-BC10	3.5439	2.70059	23989	15404	0.67	0.585	-0.392054	3.56276459751537e-106	1.31209494597296e-101	down	BC10	EEC73057.1 hypothetical protein OsI_07014 [Oryza sativa Indica Group]	-	-	-	-	GO:0016020//membrane	GO:0016757//transferase activity, transferring glycosyl groups	-
Mesophyll	SK1G00068639	Os12g0104800	0.144806	0.276855	23989	15404	0.073	0.142	0.934528530852847	3.71675537428216e-106	1.36880666924063e-101	up	Os12g0104800	XP_015619821.1 clathrin heavy chain 2-like [Oryza sativa Japonica Group]	Cellular Processes	Transport and catabolism	ko04144//Endocytosis	K04646	GO:0030117//membrane coat;GO:0030130//clathrin coat of trans-Golgi network vesicle;GO:0030132//clathrin coat of coated pit	GO:0005198//structural molecule activity	GO:0006886//intracellular protein transport;GO:0016192//vesicle-mediated transport
Mesophyll	SK1G00045812	D14L	4.19762	5.09857	23989	15404	0.793	0.841	0.28051572518301	3.77956469056747e-105	1.39193808424219e-100	up	D14L	XP_015617518.1 probable esterase D14L [Oryza sativa Japonica Group]	-	-	-	-	-	GO:0003674//molecular_function;GO:0003824//catalytic activity;GO:0047570//3-oxoadipate enol-lactonase activity;GO:0070205//2-succinyl-6-hydroxy-2,4-cyclohexadiene-1-carboxylate synthase activity	GO:0009102//biotin biosynthetic process;GO:0009234//menaquinone biosynthetic process;GO:0015979//photosynthesis;GO:0030163//protein catabolic process;GO:0042952//beta-ketoadipate pathway
Mesophyll	SK1G00052144	SK1G00052144	0.106231	0.219401	23989	15404	0.054	0.115	1.04566223398263	2.34334004642604e-104	8.63005272297781e-100	up	--	-	-	-	-	-	-	-	-
Mesophyll	SK1G00059852	SK1G00059852-HTR2	1.65323	2.71275	23989	15404	0.178	0.27	0.714437202014587	4.85081412837842e-104	1.78645782719921e-99	up	HTR2	EOY31042.1 Histone superfamily protein [Theobroma cacao]	-	-	-	-	GO:0071821//FANCM-MHF complex	GO:0003677//DNA binding	-
Mesophyll	SK1G00057431	DFR	5.88683	7.31664	23989	15404	0.821	0.869	0.313685482091997	3.76253213174713e-103	1.38566533347983e-98	up	DFR	OEL27797.1 Anthocyanidin reductase, partial [Dichanthelium oligosanthes]	-	-	-	-	-	GO:0003824//catalytic activity;GO:0003854//3-beta-hydroxy-delta5-steroid dehydrogenase activity;GO:0003978//UDP-glucose 4-epimerase activity;GO:0004043//L-aminoadipate-semialdehyde dehydrogenase activity;GO:0008460//dTDP-glucose 4,6-dehydratase activity;GO:0008712//ADP-glyceromanno-heptose 6-epimerase activity;GO:0008831//dTDP-4-dehydrorhamnose reductase activity;GO:0009020//tRNA (guanosine-2'-O-…	GO:0005975//carbohydrate metabolic process;GO:0006012//galactose metabolic process;GO:0006694//steroid biosynthetic process;GO:0008152//metabolic process;GO:0009243//O antigen biosynthetic process;GO:0009244//lipopolysaccharide core region biosynthetic process;GO:0019305//dTDP-rhamnose biosynthetic process;GO:0019878//lysine biosynthetic process via aminoadipic acid;GO:0055114//oxidation-reductio…
Mesophyll	SK1G00051268	4CL3	11.8325	9.29892	23989	15404	0.848	0.803	-0.347615	5.83456475044855e-101	2.14875350629519e-96	down	4CL3	BAS77267.1 Os02g0177600, partial [Oryza sativa Japonica Group]	Metabolism;Metabolism;Metabolism;Metabolism	Global and overview maps;Global and overview maps;Biosynthesis of other secondary metabolites;Metabolism of cofactors and vitamins	ko01100//Metabolic pathways;ko01110//Biosynthesis of secondary metabolites;ko00940//Phenylpropanoid biosynthesis;ko00130//Ubiquinone and other terpenoid-quinone biosynthesis	K01904;K01904;K01904;K01904	-	GO:0003987//acetate-CoA ligase activity;GO:0004043//L-aminoadipate-semialdehyde dehydrogenase activity;GO:0008668//(2,3-dihydroxybenzoyl)adenylate synthase activity;GO:0008756//o-succinylbenzoate-CoA ligase activity;GO:0030729//acetoacetate-CoA ligase activity;GO:0047473//D-alanine-poly(phosphoribitol) ligase activity;GO:0050218//propionate-CoA ligase activity	GO:0009234//menaquinone biosynthetic process;GO:0019287//isopentenyl diphosphate biosynthetic process, mevalonate pathway;GO:0019290//siderophore biosynthetic process;GO:0019350//teichoic acid biosynthetic process;GO:0019427//acetyl-CoA biosynthetic process from acetate;GO:0019878//lysine biosynthetic process via aminoadipic acid
Mesophyll	SK1G00057791	USP	2.65737	3.28517	23989	15404	0.69	0.756	0.305961451036589	1.32058791319793e-100	4.86346116672535e-96	up	USP	PWZ24650.1 Eukaryotic initiation factor 4A-3 [Zea mays]	Metabolism;Metabolism;Metabolism;Metabolism;Metabolism;Metabolism	Global and overview maps;Global and overview maps;Carbohydrate metabolism;Carbohydrate metabolism;Carbohydrate metabolism;Carbohydrate metabolism	ko01100//Metabolic pathways;ko01110//Biosynthesis of secondary metabolites;ko00520//Amino sugar and nucleotide sugar metabolism;ko00040//Pentose and glucuronate interconversions;ko00052//Galactose metabolism;ko00053//Ascorbate and aldarate metabolism	K12447;K12447;K12447;K12447;K12447;K12447	GO:0005658//alpha DNA polymerase:primase complex;GO:0009380//excinuclease repair complex	GO:0003676//nucleic acid binding;GO:0003677//DNA binding;GO:0003688//DNA replication origin binding;GO:0003690//double-stranded DNA binding;GO:0004003//ATP-dependent DNA helicase activity;GO:0004386//helicase activity;GO:0005515//protein binding;GO:0005524//ATP binding;GO:0008026//ATP-dependent helicase activity;GO:0009381//excinuclease ABC activity;GO:0016787//hydrolase activity;GO:0016818//hydr…	GO:0006139//nucleobase-containing compound metabolic process;GO:0006260//DNA replication;GO:0006268//DNA unwinding involved in DNA replication;GO:0006281//DNA repair;GO:0006289//nucleotide-excision repair;GO:0006310//DNA recombination;GO:0043571//maintenance of CRISPR repeat elements
Mesophyll	SK1G00039472	SK1G00039472-CLP	9.98711	7.92738	23989	15404	0.832	0.782	-0.33322	5.40596635010405e-100	1.99090928741632e-95	down	CLP	OEL21144.1 Basic 7S globulin 2 [Dichanthelium oligosanthes]	-	-	-	-	-	-	-
Mesophyll	SK1G00055474	SK1G00055474-PUB70	0.707457	0.459563	23989	15404	0.233	0.147	-0.622271	1.50005654780009e-99	5.52440825423818e-95	down	PUB70	XP_015642918.1 U-box domain-containing protein 70-like isoform X1 [Oryza sativa Japonica Group]	-	-	-	-	GO:0030867//rough endoplasmic reticulum membrane;GO:0039679//viral occlusion body	GO:0004842//ubiquitin-protein transferase activity;GO:0005515//protein binding;GO:0005524//ATP binding;GO:0008270//zinc ion binding	GO:0007059//chromosome segregation;GO:0016567//protein ubiquitination;GO:0023041//neuronal signal transduction;GO:0030261//chromosome condensation
Mesophyll	SK1G00040364	Os01g0803200	30.5134	24.4204	23989	15404	0.932	0.917	-0.321355	2.54655696201937e-99	9.37845997972495e-95	down	Os01g0803200	XP_015621143.1 cysteine proteinase inhibitor 1 [Oryza sativa Japonica Group]	-	-	-	-	-	GO:0004869//cysteine-type endopeptidase inhibitor activity	-
Mesophyll	SK1G00067174	RPS5A	1.70094	2.21376	23989	15404	0.514	0.608	0.380141008538504	2.95278686575958e-98	1.08745234692194e-93	up	RPS5A	XP_015617601.1 40S ribosomal protein S5 [Oryza sativa Japonica Group]	Genetic Information Processing	Translation	ko03010//Ribosome	K02989	GO:0000314//organellar small ribosomal subunit;GO:0022627//cytosolic small ribosomal subunit	GO:0003735//structural constituent of ribosome	GO:0006412//translation
Mesophyll	SK1G00045778	rps5	0.75007	1.16075	23989	15404	0.268	0.335	0.62989061906844	3.38228032112605e-98	1.2456261966643e-93	up	rps5	EAY90626.1 hypothetical protein OsI_12226 [Oryza sativa Indica Group]	Genetic Information Processing	Translation	ko03010//Ribosome	K02988	GO:0000312//plastid small ribosomal subunit;GO:0005840//ribosome;GO:0022627//cytosolic small ribosomal subunit	GO:0003723//RNA binding;GO:0003735//structural constituent of ribosome	GO:0006412//translation
Mesophyll	SK1G00055401	SK1G00055401-RPS30A	3.24286	3.99188	23989	15404	0.704	0.766	0.299794196489283	2.24913832138543e-96	8.28312660999826e-92	up	RPS30A	ESR64610.1 hypothetical protein CICLE_v10009868mg [Citrus clementina]	Genetic Information Processing	Translation	ko03010//Ribosome	K02983	GO:0005840//ribosome	GO:0003735//structural constituent of ribosome	GO:0006412//translation
Mesophyll	SK1G00044312	RPS15	2.01783	2.60048	23989	15404	0.554	0.639	0.365956989108506	2.25062933528071e-96	8.2886177159718e-92	up	RPS15	XP_015632818.1 40S ribosomal protein S15-like [Oryza sativa Japonica Group]	Genetic Information Processing	Translation	ko03010//Ribosome	K02958	GO:0000314//organellar small ribosomal subunit;GO:0005840//ribosome;GO:0022627//cytosolic small ribosomal subunit	GO:0003735//structural constituent of ribosome	GO:0006412//translation;GO:0039653//suppression by virus of host transcription
Mesophyll	SK1G00056160	SEC11A	0.103434	0.209631	23989	15404	0.053	0.111	1.01843175710042	2.47639775786961e-96	9.1200776626822e-92	up	SEC11A	XP_015644494.1 signal peptidase complex catalytic subunit SEC11A [Oryza sativa Japonica Group]	Genetic Information Processing	Folding, sorting and degradation	ko03060//Protein export	K13280	-	GO:0004252//serine-type endopeptidase activity	GO:0006465//signal peptide processing;GO:0009306//protein secretion
Mesophyll	SK1G00047551	SK1G00047551-RPS9C	1.69193	2.21258	23989	15404	0.501	0.594	0.387043486842874	2.30730652807265e-95	8.49734848158595e-91	up	RPS9C	XP_015616973.1 40S ribosomal protein S9-2 [Oryza sativa Japonica Group]	Genetic Information Processing	Translation	ko03010//Ribosome	K02997	GO:0000314//organellar small ribosomal subunit;GO:0022627//cytosolic small ribosomal subunit	GO:0003723//RNA binding;GO:0003735//structural constituent of ribosome;GO:0019843//rRNA binding	GO:0006412//translation
Mesophyll	SK1G00065852	SK1G00065852-CRRSP55	3.05098	2.30708	23989	15404	0.611	0.531	-0.403189	3.70414981075001e-95	1.36416429230301e-90	down	CRRSP55	XP_015649879.1 cysteine-rich repeat secretory protein 55 [Oryza sativa Japonica Group]	-	-	-	-	GO:0005634//nucleus	GO:0003676//nucleic acid binding;GO:0004526//ribonuclease P activity	GO:0006355//regulation of transcription, DNA-templated;GO:0008033//tRNA processing
Mesophyll	SK1G00061067	SK1G00061067-ERF071	1.2592	0.896495	23989	15404	0.395	0.295	-0.490095	1.32318143206942e-93	4.87301257802527e-89	down	ERF071	XP_015644689.1 ethylene-responsive transcription factor RAP2-3 [Oryza sativa Japonica Group]	-	-	-	-	-	GO:0003700//transcription factor activity, sequence-specific DNA binding	GO:0006355//regulation of transcription, DNA-templated
Mesophyll	SK1G00039322	SK1G00039322-Sb03g046810	6.93033	4.39261	23989	15404	0.431	0.348	-0.657835	5.49329613364058e-93	2.02307110009715e-88	down	Sb03g046810	CAH69262.1 TPA: class III peroxidase 20 precursor [Oryza sativa Japonica Group]	Metabolism;Metabolism;Metabolism	Global and overview maps;Global and overview maps;Biosynthesis of other secondary metabolites	ko01100//Metabolic pathways;ko01110//Biosynthesis of secondary metabolites;ko00940//Phenylpropanoid biosynthesis	K00430;K00430;K00430	-	GO:0004601//peroxidase activity;GO:0020037//heme binding	GO:0006979//response to oxidative stress;GO:0055114//oxidation-reduction process
Mesophyll	SK1G00061255	SK1G00061255-CP29B	3.38325	4.27484	23989	15404	0.623	0.708	0.337452435572576	6.21432169282237e-93	2.28861039303262e-88	up	CP29B	EAZ04802.1 hypothetical protein OsI_26976 [Oryza sativa Indica Group]	-	-	-	-	-	GO:0003676//nucleic acid binding	GO:0008380//RNA splicing
Mesophyll	SK1G00055134	SK1G00055134-RPL13B	0.732452	1.05006	23989	15404	0.292	0.385	0.519601880250737	1.82922304411069e-92	6.73666262685083e-88	up	RPL13B	XP_015644376.1 60S ribosomal protein L13-1 [Oryza sativa Japonica Group]	Genetic Information Processing	Translation	ko03010//Ribosome	K02873	GO:0005840//ribosome	GO:0000334//3-hydroxyanthranilate 3,4-dioxygenase activity;GO:0003735//structural constituent of ribosome;GO:0005506//iron ion binding;GO:0016655//oxidoreductase activity, acting on NAD(P)H, quinone or similar compound as acceptor	GO:0006412//translation;GO:0006814//sodium ion transport;GO:0055114//oxidation-reduction process
Mesophyll	SK1G00048813	SK1G00048813-At5g10770	0.843746	0.545995	23989	15404	0.308	0.228	-0.627826	5.22346227992289e-92	1.92369668845e-87	down	At5g10770	XP_015626008.1 aspartyl protease family protein At5g10770 [Oryza sativa Japonica Group]	-	-	-	-	-	-	-
Mesophyll	SK1G00075237	ATPA	3.03338	3.94901	23989	15404	0.566	0.663	0.380554157176492	5.56628810334467e-92	2.04995258269977e-87	up	ATPA	YP_003433863.1 ATP synthase F0 subunit 1 [Oryza rufipogon]	Metabolism;Metabolism	Global and overview maps;Energy metabolism	ko01100//Metabolic pathways;ko00190//Oxidative phosphorylation	K02132;K02132	GO:0000275//mitochondrial proton-transporting ATP synthase complex, catalytic core F(1);GO:0009288//bacterial-type flagellum;GO:0016469//proton-transporting two-sector ATPase complex;GO:0016471//vacuolar proton-transporting V-type ATPase complex;GO:0030257//type III protein secretion system complex;GO:0045261//proton-transporting ATP synthase complex, catalytic core F(1);GO:0045262//plasma membra…	GO:0004386//helicase activity;GO:0005524//ATP binding;GO:0008186//RNA-dependent ATPase activity;GO:0008553//hydrogen-exporting ATPase activity, phosphorylative mechanism;GO:0016887//ATPase activity;GO:0046933//proton-transporting ATP synthase activity, rotational mechanism;GO:0046961//proton-transporting ATPase activity, rotational mechanism	GO:0001539//cilium or flagellum-dependent cell motility;GO:0006353//DNA-templated transcription, termination;GO:0009405//pathogenesis;GO:0015986//ATP synthesis coupled proton transport;GO:0015991//ATP hydrolysis coupled proton transport;GO:0030254//protein secretion by the type III secretion system;GO:0046034//ATP metabolic process;GO:1902600//hydrogen ion transmembrane transport
Mesophyll	SK1G00053007	SK1G00053007	0.631232	0.448629	23989	15404	0.253	0.169	-0.492554	3.82082814431206e-91	1.40713458898725e-86	down	--	-	-	-	-	-	-	-	-
Mesophyll	SK1G00047831	SK1G00047831-At1g07660	2.45596	3.47718	23989	15404	0.285	0.381	0.501613159599283	4.19126119369506e-89	1.54355767241402e-84	up	At1g07660	XP_016507811.1 PREDICTED: uncharacterized protein LOC107825453 [Nicotiana tabacum]	-	-	-	-	GO:0071821//FANCM-MHF complex	GO:0003677//DNA binding	GO:0006352//DNA-templated transcription, initiation
Mesophyll	SK1G00043158	BHLH41	0.430855	0.726663	23989	15404	0.136	0.213	0.753948535679037	2.9419245451929e-88	1.08345197150364e-83	up	BHLH41	EEC70105.1 hypothetical protein OsI_00760 [Oryza sativa Indica Group]	-	-	-	-	GO:0005876//spindle microtubule;GO:0042729//DASH complex	GO:0003700//transcription factor activity, sequence-specific DNA binding;GO:0004674//protein serine/threonine kinase activity;GO:0005524//ATP binding;GO:0046983//protein dimerization activity	GO:0006355//regulation of transcription, DNA-templated;GO:0006468//protein phosphorylation;GO:0008608//attachment of spindle microtubules to kinetochore
Mesophyll	SK1G00063157	SK1G00063157-RPS15	2.0866	2.58337	23989	15404	0.599	0.682	0.308091732318893	1.09145100727011e-86	4.01959576957436e-82	up	RPS15	XP_015647750.1 40S ribosomal protein S15 [Oryza sativa Japonica Group]	Genetic Information Processing	Translation	ko03010//Ribosome	K02958	GO:0000314//organellar small ribosomal subunit;GO:0005840//ribosome;GO:0022627//cytosolic small ribosomal subunit	GO:0003735//structural constituent of ribosome	GO:0006412//translation;GO:0039653//suppression by virus of host transcription
Mesophyll	SK1G00053020	SK1G00053020	0.322843	0.192026	23989	15404	0.151	0.085	-0.749227	1.23983617337588e-86	4.56606865930868e-82	down	--	-	-	-	-	-	-	-	-
Mesophyll	SK1G00057580	SK1G00057580	1.88466	2.47882	23989	15404	0.46	0.554	0.395328102025662	4.97203037405278e-86	1.83109934615616e-81	up	--	XP_015644119.1 uncharacterized protein LOC9271699 [Oryza sativa Japonica Group]	-	-	-	-	-	-	-
Mesophyll	SK1G00048921	LPPE2	3.0886	2.48947	23989	15404	0.692	0.622	-0.311106	5.86006466912182e-85	2.15814461634418e-80	down	LPPE2	KAB8088525.1 hypothetical protein EE612_013159 [Oryza sativa]	-	-	-	-	-	-	-
Mesophyll	SK1G00044177	SK1G00044177-RPS23	1.27962	1.6997	23989	15404	0.428	0.517	0.40953939561322	8.95193949591283e-85	3.29682027755478e-80	up	RPS23	EAZ14059.1 hypothetical protein OsJ_03983 [Oryza sativa Japonica Group]	Genetic Information Processing	Translation	ko03010//Ribosome	K02973	GO:0000314//organellar small ribosomal subunit;GO:0005840//ribosome;GO:0022627//cytosolic small ribosomal subunit	GO:0003735//structural constituent of ribosome	GO:0006412//translation
Mesophyll	SK1G00043334	RPP2A	1.37546	1.80521	23989	15404	0.424	0.518	0.392233683088365	1.90360785716162e-84	7.01060701635482e-80	up	RPP2A	XP_015622106.1 60S acidic ribosomal protein P2A [Oryza sativa Japonica Group]	Genetic Information Processing	Translation	ko03010//Ribosome	K02943	-	-	GO:0009291//unidirectional conjugation
Mesophyll	SK1G00040888	SK1G00040888	4.35006	5.70725	23989	15404	0.544	0.627	0.391753841703671	1.97920820873909e-84	7.28902799114433e-80	up	--	EAY75611.1 hypothetical protein OsI_03515 [Oryza sativa Indica Group]	-	-	-	-	GO:0010007//magnesium chelatase complex	GO:0005488//binding;GO:0008168//methyltransferase activity;GO:0008170//N-methyltransferase activity;GO:0008171//O-methyltransferase activity;GO:0008689//3-demethylubiquinone-9 3-O-methyltransferase activity;GO:0008757//S-adenosylmethionine-dependent methyltransferase activity;GO:0016851//magnesium chelatase activity;GO:0046025//precorrin-6Y C5,15-methyltransferase (decarboxylating) activity;GO:00…	GO:0006412//translation;GO:0006744//ubiquinone biosynthetic process;GO:0008299//isoprenoid biosynthetic process;GO:0009102//biotin biosynthetic process;GO:0015995//chlorophyll biosynthetic process;GO:0018364//peptidyl-glutamine methylation;GO:0044272//sulfur compound biosynthetic process;GO:0046140//corrin biosynthetic process;GO:0055114//oxidation-reduction process
Mesophyll	SK1G00058269	OsI_017815	7.67471	6.20165	23989	15404	0.87	0.842	-0.307454	5.24909603952807e-84	1.9331370894374e-79	down	OsI_017815	A2Y0H2.1 RecName: Full=REF/SRPP-like protein OsI_017815 [Oryza sativa Indica Group]	-	-	-	-	-	-	-
Mesophyll	SK1G00061204	SK1G00061204-rps6	1.94538	2.46094	23989	15404	0.541	0.624	0.339140284851691	1.03693864508173e-83	3.81883764210701e-79	up	rps6	XP_015646376.1 40S ribosomal protein S6 [Oryza sativa Japonica Group]	Genetic Information Processing	Translation	ko03010//Ribosome	K02991	GO:0005840//ribosome	GO:0003735//structural constituent of ribosome	GO:0006412//translation
Mesophyll	SK1G00063746	SK1G00063746-ACL1.3	2.58341	3.16882	23989	15404	0.622	0.697	0.294660056311723	1.29030585253597e-83	4.75193839371946e-79	up	ACL1.3	XP_015650677.1 acyl carrier protein 3, chloroplastic [Oryza sativa Japonica Group]	-	-	-	-	-	GO:0000036//ACP phosphopantetheine attachment site binding involved in fatty acid biosynthetic process;GO:0004043//L-aminoadipate-semialdehyde dehydrogenase activity	GO:0006633//fatty acid biosynthetic process;GO:0019878//lysine biosynthetic process via aminoadipic acid
Mesophyll	SK1G00044929	At4g39670	0.275131	0.47284	23989	15404	0.122	0.193	0.781014713656479	3.24986360572509e-83	1.19685976871644e-78	up	At4g39670	AAX95657.1 hypothetical protein [Oryza sativa Japonica Group]	-	-	-	-	GO:0005737//cytoplasm	-	-
Mesophyll	SK1G00058245	SK1G00058245	2.48753	3.02636	23989	15404	0.672	0.735	0.282858716281351	1.70424038729588e-82	6.27637649833325e-78	up	--	XP_015640646.1 uncharacterized protein LOC4337650 [Oryza sativa Japonica Group]	-	-	-	-	-	-	-
Mesophyll	SK1G00075263	SK1G00075263-RPS4	0.368822	0.658668	23989	15404	0.132	0.205	0.83645419743567	1.88421080323142e-82	6.93917154614066e-78	up	RPS4	YP_003433848.1 ribosomal protein small subunit 4 [Oryza rufipogon]	Genetic Information Processing	Translation	ko03010//Ribosome	K02986	GO:0000314//organellar small ribosomal subunit;GO:0022627//cytosolic small ribosomal subunit	GO:0003723//RNA binding;GO:0003735//structural constituent of ribosome	GO:0006412//translation
Mesophyll	SK1G00062358	RPN12A	0.861625	1.1814	23989	15404	0.334	0.423	0.455324031753016	6.18280724415154e-82	2.27700425187613e-77	up	RPN12A	EEC81937.1 hypothetical protein OsI_25803 [Oryza sativa Indica Group]	Genetic Information Processing	Folding, sorting and degradation	ko03050//Proteasome	K03031	-	GO:0047810//D-alanine:2-oxoglutarate aminotransferase activity	GO:0019480//L-alanine oxidation to pyruvate via D-alanine
Mesophyll	SK1G00041956	SK1G00041956-CCR1	2.46114	3.22816	23989	15404	0.495	0.58	0.391372410214082	2.54701101150526e-81	9.38013215317158e-77	up	CCR1	EAY74373.1 hypothetical protein OsI_02260 [Oryza sativa Indica Group]	-	-	-	-	-	GO:0003824//catalytic activity;GO:0003854//3-beta-hydroxy-delta5-steroid dehydrogenase activity;GO:0003978//UDP-glucose 4-epimerase activity;GO:0004043//L-aminoadipate-semialdehyde dehydrogenase activity;GO:0008712//ADP-glyceromanno-heptose 6-epimerase activity;GO:0016616//oxidoreductase activity, acting on the CH-OH group of donors, NAD or NADP as acceptor;GO:0016655//oxidoreductase activity, ac…	GO:0005975//carbohydrate metabolic process;GO:0006012//galactose metabolic process;GO:0006694//steroid biosynthetic process;GO:0008152//metabolic process;GO:0009243//O antigen biosynthetic process;GO:0009244//lipopolysaccharide core region biosynthetic process;GO:0019878//lysine biosynthetic process via aminoadipic acid;GO:0055114//oxidation-reduction process
Mesophyll	SK1G00045483	SK1G00045483-GDPD6	2.14045	1.55209	23989	15404	0.486	0.418	-0.463678	8.91503606370094e-81	3.28322948153978e-76	down	GDPD6	XP_015627990.1 glycerophosphodiester phosphodiesterase GDPD6 [Oryza sativa Japonica Group]	Metabolism	Lipid metabolism	ko00564//Glycerophospholipid metabolism	K01126	-	GO:0008081//phosphoric diester hydrolase activity	GO:0006629//lipid metabolic process
Mesophyll	SK1G00045615	RPL15	1.42745	1.87798	23989	15404	0.427	0.515	0.395718556607696	1.96248825649296e-80	7.22745175101228e-76	up	RPL15	XP_015632743.1 60S ribosomal protein L15 [Oryza sativa Japonica Group]	Genetic Information Processing	Translation	ko03010//Ribosome	K02877	GO:0005840//ribosome	GO:0003735//structural constituent of ribosome	GO:0006412//translation
Mesophyll	SK1G00052099	SK1G00052099	0.31151	0.662394	23989	15404	0.1	0.146	1.08816631195355	4.79005585028423e-80	1.76408176854268e-75	up	--	AHW98635.1 hypothetical protein [Oryza glaberrima]	-	-	-	-	GO:0033179//proton-transporting V-type ATPase, V0 domain	GO:0005524//ATP binding;GO:0008134//transcription factor binding;GO:0015078//hydrogen ion transmembrane transporter activity;GO:0042803//protein homodimerization activity;GO:0070840//dynein complex binding	GO:0007059//chromosome segregation;GO:0009401//phosphoenolpyruvate-dependent sugar phosphotransferase system;GO:0030261//chromosome condensation;GO:1902600//hydrogen ion transmembrane transport
Mesophyll	SK1G00062783	SK1G00062783-GSDA	5.24831	6.38603	23989	15404	0.632	0.717	0.283062523919529	5.1413760883574e-78	1.89346598582026e-73	up	GSDA	ABR25967.1 cytidine/deoxycytidylate deaminase family protein [Oryza sativa Indica Group]	-	-	-	-	GO:0009897//external side of plasma membrane;GO:0030288//outer membrane-bounded periplasmic space;GO:0055052//ATP-binding cassette (ABC) transporter complex, substrate-binding subunit-containing	GO:0008251//tRNA-specific adenosine deaminase activity;GO:0008703//5-amino-6-(5-phosphoribosylamino)uracil reductase activity;GO:0008835//diaminohydroxyphosphoribosylaminopyrimidine deaminase activity;GO:0015297//antiporter activity;GO:0015619//thiamine pyrophosphate-transporting ATPase activity;GO:0030975//thiamine binding;GO:0030976//thiamine pyrophosphate binding;GO:0048502//thiamine-transport…	GO:0002100//tRNA wobble adenosine to inosine editing;GO:0009231//riboflavin biosynthetic process;GO:0015888//thiamine transport;GO:0030974//thiamine pyrophosphate transport
Mesophyll	SK1G00049663	SMD1B	0.70716	0.987783	23989	15404	0.287	0.375	0.482100298496928	1.72088045760999e-77	6.33765854928606e-73	up	SMD1B	XP_006647432.1 PREDICTED: small nuclear ribonucleoprotein Sm D1 [Oryza brachyantha]	Genetic Information Processing	Transcription	ko03040//Spliceosome	K11087	GO:0034719//SMN-Sm protein complex	GO:0003723//RNA binding	GO:0006355//regulation of transcription, DNA-templated;GO:0006464//cellular protein modification process
Mesophyll	SK1G00050076	At2g33490	3.73584	3.09941	23989	15404	0.756	0.709	-0.269431	6.95649767743817e-77	2.56193896464693e-72	down	At2g33490	EAY86037.1 hypothetical protein OsI_07401 [Oryza sativa Indica Group]	-	-	-	-	-	-	-
Mesophyll	SK1G00074440	SK1G00074440-GYP7	1.17783	1.54337	23989	15404	0.414	0.498	0.389919511459269	1.46914540278853e-76	5.41056868938961e-72	up	GYP7	XP_015612460.1 GTPase-activating protein gyp7 [Oryza sativa Japonica Group]	-	-	-	-	-	-	-
Mesophyll	SK1G00074583	SK1G00074583-NFD4	0.677572	0.973229	23989	15404	0.213	0.295	0.522339851469286	5.52239563164864e-75	2.03378786322356e-70	up	NFD4	XP_015612038.1 protein NUCLEAR FUSION DEFECTIVE 4 [Oryza sativa Japonica Group]	-	-	-	-	-	-	-
Mesophyll	SK1G00044568	RPL13AD	2.23645	2.74719	23989	15404	0.583	0.658	0.296733066200973	1.76148233484667e-74	6.48718714277332e-70	up	RPL13AD	XP_015632279.1 60S ribosomal protein L13a-4 [Oryza sativa Japonica Group]	Genetic Information Processing	Translation	ko03010//Ribosome	K02872	GO:0000315//organellar large ribosomal subunit;GO:0005840//ribosome;GO:0022625//cytosolic large ribosomal subunit	GO:0003735//structural constituent of ribosome	GO:0006412//translation
Mesophyll	SK1G00075146	SK1G00075146-rps11	10.3611	13.7764	23989	15404	0.647	0.687	0.411019414098121	2.90025680918511e-74	1.06810657768669e-69	up	rps11	YP_009135474.1 ribosomal protein S11 [Olmeca reflexa]	Genetic Information Processing	Translation	ko03010//Ribosome	K02948	GO:0005840//ribosome;GO:0022627//cytosolic small ribosomal subunit	GO:0003735//structural constituent of ribosome	GO:0006412//translation
Mesophyll	SK1G00063398	SK1G00063398-RPS12	1.8825	2.37703	23989	15404	0.522	0.6	0.336495183281753	5.8431911767174e-74	2.15193044656149e-69	up	RPS12	EEC81520.1 hypothetical protein OsI_24909 [Oryza sativa Indica Group]	Genetic Information Processing	Translation	ko03010//Ribosome	K02951	-	-	-
Mesophyll	SK1G00062068	2025-04-01	1.22826	0.801978	23989	15404	0.301	0.224	-0.614922	1.31209456021722e-73	4.832181846368e-69	down	2025-04-01	XP_015647625.1 probable 5'-adenylylsulfate reductase 1, chloroplastic [Oryza sativa Japonica Group]	Metabolism;Metabolism	Global and overview maps;Energy metabolism	ko01100//Metabolic pathways;ko00920//Sulfur metabolism	K05907;K05907	GO:0005737//cytoplasm	GO:0003756//protein disulfide isomerase activity;GO:0003824//catalytic activity;GO:0004604//phosphoadenylyl-sulfate reductase (thioredoxin) activity;GO:0009973//adenylyl-sulfate reductase activity;GO:0015036//disulfide oxidoreductase activity;GO:0016667//oxidoreductase activity, acting on a sulfur group of donors	GO:0006457//protein folding;GO:0006790//sulfur compound metabolic process;GO:0010134//sulfate assimilation via adenylyl sulfate reduction;GO:0019379//sulfate assimilation, phosphoadenylyl sulfate reduction by phosphoadenylyl-sulfate reductase (thioredoxin);GO:0055114//oxidation-reduction process
Mesophyll	SK1G00067900	ADH1	6.68664	4.90511	23989	15404	0.665	0.611	-0.446987	3.78418548383104e-73	1.3936398299853e-68	down	ADH1	XP_015616853.1 alcohol dehydrogenase 1 isoform X2 [Oryza sativa Japonica Group]	Metabolism;Metabolism;Metabolism;Metabolism;Metabolism;Metabolism	Global and overview maps;Global and overview maps;Carbohydrate metabolism;Lipid metabolism;Lipid metabolism;Amino acid metabolism	ko01100//Metabolic pathways;ko01110//Biosynthesis of secondary metabolites;ko00010//Glycolysis / Gluconeogenesis;ko00592//alpha-Linolenic acid metabolism;ko00071//Fatty acid degradation;ko00350//Tyrosine metabolism	K18857;K18857;K18857;K18857;K18857;K18857	-	GO:0004024//alcohol dehydrogenase activity, zinc-dependent;GO:0008270//zinc ion binding;GO:0008743//L-threonine 3-dehydrogenase activity;GO:0016491//oxidoreductase activity;GO:0016616//oxidoreductase activity, acting on the CH-OH group of donors, NAD or NADP as acceptor;GO:0016655//oxidoreductase activity, acting on NAD(P)H, quinone or similar compound as acceptor;GO:0018467//formaldehyde dehydro…	GO:0006113//fermentation;GO:0006567//threonine catabolic process;GO:0006813//potassium ion transport;GO:0008152//metabolic process;GO:0009404//toxin metabolic process;GO:0010127//mycothiol-dependent detoxification;GO:0019439//aromatic compound catabolic process;GO:0030494//bacteriochlorophyll biosynthetic process;GO:0046292//formaldehyde metabolic process;GO:0055114//oxidation-reduction process
Mesophyll	SK1G00046777	RPS7	1.92729	2.38828	23989	15404	0.557	0.629	0.309387482495295	7.84961537796072e-73	2.89085635139537e-68	up	RPS7	XP_015631394.1 40S ribosomal protein S7-like [Oryza sativa Japonica Group]	Genetic Information Processing	Translation	ko03010//Ribosome	K02993	GO:0005840//ribosome	GO:0003735//structural constituent of ribosome	GO:0006412//translation
Mesophyll	SK1G00060508	SK1G00060508	3.99806	3.23484	23989	15404	0.715	0.658	-0.305598	1.45409081389741e-72	5.3551256494214e-68	down	--	AAT44186.1 unknown protein [Oryza sativa Japonica Group]	-	-	-	-	-	-	-
Mesophyll	SK1G00052932	SK1G00052932-RPS8	3.33593	4.03393	23989	15404	0.727	0.779	0.274090986161793	2.70768961713533e-72	9.971879321986e-68	up	RPS8	EAY93669.1 hypothetical protein OsI_15456 [Oryza sativa Indica Group]	Genetic Information Processing	Translation	ko03010//Ribosome	K02995	GO:0000314//organellar small ribosomal subunit;GO:0022627//cytosolic small ribosomal subunit	GO:0003735//structural constituent of ribosome	GO:0006412//translation
Mesophyll	SK1G00060761	SK1G00060761-WRKY28	1.65362	2.08663	23989	15404	0.48	0.567	0.33553567991418	1.12271813222994e-71	4.13474633737643e-67	up	WRKY28	XP_015637709.1 WRKY transcription factor 23 isoform X2 [Oryza sativa Japonica Group]	-	-	-	-	-	GO:0003700//transcription factor activity, sequence-specific DNA binding;GO:0043565//sequence-specific DNA binding	GO:0006355//regulation of transcription, DNA-templated
Mesophyll	SK1G00042249	OPR10	0.380006	0.626365	23989	15404	0.12	0.186	0.720832961778342	1.13730994065402e-71	4.18848504944064e-67	up	OPR10	EAY74071.1 hypothetical protein OsI_01959 [Oryza sativa Indica Group]	Metabolism;Metabolism;Metabolism	Global and overview maps;Global and overview maps;Lipid metabolism	ko01100//Metabolic pathways;ko01110//Biosynthesis of secondary metabolites;ko00592//alpha-Linolenic acid metabolism	K05894;K05894;K05894	-	GO:0010181//FMN binding;GO:0016491//oxidoreductase activity	GO:0055114//oxidation-reduction process
Mesophyll	SK1G00071266	At3g48880	0.27479	0.436314	23989	15404	0.13	0.198	0.666843452932014	1.77895604232797e-71	6.55153931268546e-67	up	At3g48880	EEC67261.1 hypothetical protein OsI_34223 [Oryza sativa Indica Group]	-	-	-	-	-	GO:0005515//protein binding	-
Mesophyll	SK1G00071265	SK1G00071265	1.20293	1.55432	23989	15404	0.435	0.514	0.369707065419095	3.9010880034423e-71	1.43669268990773e-66	up	--	BAC84393.1 hypothetical protein [Oryza sativa Japonica Group]	-	-	-	-	-	-	-
Mesophyll	SK1G00070679	SK1G00070679-UBC18	0.288211	0.464237	23989	15404	0.134	0.202	0.687547907300727	8.31059895179563e-71	3.06062738196729e-66	up	UBC18	XP_015618128.1 probable ubiquitin-conjugating enzyme E2 18 [Oryza sativa Japonica Group]	Genetic Information Processing	Folding, sorting and degradation	ko04120//Ubiquitin mediated proteolysis	K10688	-	GO:0005515//protein binding;GO:0061657//UFM1 conjugating enzyme activity	GO:0006464//cellular protein modification process;GO:0015031//protein transport;GO:0071569//protein ufmylation
Mesophyll	SK1G00058044	PPA4	0.608483	0.39173	23989	15404	0.196	0.128	-0.635226	9.90916216732012e-71	3.64934624298065e-66	down	PPA4	XP_015640562.1 soluble inorganic pyrophosphatase 4 [Oryza sativa Japonica Group]	Metabolism	Energy metabolism	ko00190//Oxidative phosphorylation	K01507	GO:0005737//cytoplasm	GO:0000287//magnesium ion binding;GO:0004427//inorganic diphosphatase activity;GO:0004798//thymidylate kinase activity	GO:0006796//phosphate-containing compound metabolic process;GO:0015949//nucleobase-containing small molecule interconversion
Mesophyll	SK1G00043563	TPI	1.70191	1.29477	23989	15404	0.505	0.449	-0.394432	3.60929284372502e-70	1.32923036848705e-65	down	TPI	XP_015621507.1 triosephosphate isomerase, cytosolic [Oryza sativa Japonica Group]	Metabolism;Metabolism;Metabolism;Metabolism;Metabolism;Metabolism;Metabolism;Metabolism	Global and overview maps;Global and overview maps;Global and overview maps;Global and overview maps;Carbohydrate metabolism;Energy metabolism;Carbohydrate metabolism;Carbohydrate metabolism	ko01100//Metabolic pathways;ko01110//Biosynthesis of secondary metabolites;ko01200//Carbon metabolism;ko01230//Biosynthesis of amino acids;ko00010//Glycolysis / Gluconeogenesis;ko00710//Carbon fixation in photosynthetic organisms;ko00051//Fructose and mannose metabolism;ko00562//Inositol phosphate metabolism	K01803;K01803;K01803;K01803;K01803;K01803;K01803;K01803	-	GO:0004807//triose-phosphate isomerase activity	GO:0006096//glycolytic process
Mesophyll	SK1G00061120	At3g06035	0.434567	0.63601	23989	15404	0.187	0.263	0.54936611171943	9.33774539180272e-70	3.43890487289311e-65	up	At3g06035	XP_015645047.1 uncharacterized GPI-anchored protein At5g19250 [Oryza sativa Japonica Group]	-	-	-	-	-	GO:0016835//carbon-oxygen lyase activity	GO:0019509//L-methionine biosynthetic process from methylthioadenosine
Mesophyll	SK1G00058934	SK1G00058934-At1g56140	1.24461	0.934304	23989	15404	0.432	0.354	-0.413686	1.2657004734392e-69	4.66132170358189e-65	down	At1g56140	XP_015639175.1 probable LRR receptor-like serine/threonine-protein kinase At1g56130 isoform X1 [Oryza sativa Japonica Group]	-	-	-	-	GO:0016020//membrane	GO:0004672//protein kinase activity;GO:0005515//protein binding;GO:0005524//ATP binding	GO:0006468//protein phosphorylation;GO:0006865//amino acid transport
Mesophyll	SK1G00047954	SK1G00047954-AZI1	0.811185	0.428925	23989	15404	0.121	0.068	-0.919147	1.01821579674272e-68	3.74988513624408e-64	down	AZI1	XP_015632237.1 cortical cell-delineating protein [Oryza sativa Japonica Group]	-	-	-	-	-	-	-
Mesophyll	SK1G00046798	SK1G00046798-VPS9A	0.202255	0.329176	23989	15404	0.102	0.163	0.702410991603323	1.61509012599537e-68	5.94805391601573e-64	up	VPS9A	XP_015632668.1 vacuolar protein sorting-associated protein 9A isoform X1 [Oryza sativa Japonica Group]	-	-	-	-	-	-	-
Mesophyll	SK1G00065622	At3g03070	0.816745	1.07739	23989	15404	0.345	0.425	0.399538908792685	4.66039314792864e-68	1.71632958851916e-63	up	At3g03070	XP_015648447.1 NADH dehydrogenase [ubiquinone] iron-sulfur protein 6, mitochondrial [Oryza sativa Japonica Group]	Metabolism;Metabolism	Global and overview maps;Energy metabolism	ko01100//Metabolic pathways;ko00190//Oxidative phosphorylation	K03939;K03939	-	-	-
Mesophyll	SK1G00063838	SK1G00063838-NTF2	1.28715	1.65654	23989	15404	0.436	0.519	0.363963274018331	6.70839745476075e-68	2.47056861463929e-63	up	NTF2	XP_015650850.1 nuclear transport factor 2 [Oryza sativa Japonica Group]	-	-	-	-	-	-	-
Mesophyll	SK1G00071311	SK1G00071311	3.63699	4.52317	23989	15404	0.607	0.672	0.314581472196029	8.99378155538012e-68	3.31222987121539e-63	up	--	-	-	-	-	-	-	-	-
Mesophyll	SK1G00072401	RPS20A	2.37052	2.86668	23989	15404	0.613	0.68	0.274171160893082	8.24845929297259e-67	3.03774258841595e-62	up	RPS20A	XP_015614818.1 40S ribosomal protein S20-1 [Oryza sativa Japonica Group]	Genetic Information Processing	Translation	ko03010//Ribosome	K02969	GO:0000314//organellar small ribosomal subunit;GO:0022627//cytosolic small ribosomal subunit	GO:0003735//structural constituent of ribosome	GO:0006412//translation
Mesophyll	SK1G00047338	ACA2	2.41188	1.89785	23989	15404	0.574	0.511	-0.345774	1.95053802908515e-66	7.1834414535148e-62	down	ACA2	XP_015631775.1 calcium-transporting ATPase 2, plasma membrane-type [Oryza sativa Japonica Group]	-	-	-	-	GO:0031004//potassium ion-transporting ATPase complex	GO:0004008//copper-exporting ATPase activity;GO:0004647//phosphoserine phosphatase activity;GO:0005375//copper ion transmembrane transporter activity;GO:0005388//calcium-transporting ATPase activity;GO:0005516//calmodulin binding;GO:0008556//potassium-transporting ATPase activity;GO:0008967//phosphoglycolate phosphatase activity;GO:0015434//cadmium-transporting ATPase activity;GO:0015444//magnesi…	GO:0006545//glycine biosynthetic process;GO:0006564//L-serine biosynthetic process;GO:0006813//potassium ion transport;GO:0006816//calcium ion transport;GO:0006825//copper ion transport;GO:0008152//metabolic process;GO:0015691//cadmium ion transport;GO:0015693//magnesium ion transport;GO:0030001//metal ion transport
Mesophyll	SK1G00051853	BIP1	4.6174	3.08065	23989	15404	0.469	0.402	-0.583829	2.33166193522071e-65	8.58704457503085e-61	down	BIP1	XP_015625618.1 heat shock 70 kDa protein BIP1 [Oryza sativa Japonica Group]	Genetic Information Processing;Genetic Information Processing	Folding, sorting and degradation;Folding, sorting and degradation	ko04141//Protein processing in endoplasmic reticulum;ko03060//Protein export	K09490;K09490	-	GO:0004856//xylulokinase activity;GO:0005515//protein binding;GO:0005524//ATP binding;GO:0016773//phosphotransferase activity, alcohol group as acceptor;GO:0016787//hydrolase activity;GO:0016887//ATPase activity;GO:0051082//unfolded protein binding	GO:0005975//carbohydrate metabolic process;GO:0005997//xylulose metabolic process;GO:0006457//protein folding;GO:0006950//response to stress;GO:0008360//regulation of cell shape;GO:0042732//D-xylose metabolic process;GO:0043093//FtsZ-dependent cytokinesis
Mesophyll	SK1G00061879	RPL38A	2.15682	2.62783	23989	15404	0.589	0.654	0.284950063963409	4.11672185159209e-65	1.51610632350434e-60	up	RPL38A	XP_015617721.1 60S ribosomal protein L38 [Oryza sativa Japonica Group]	Genetic Information Processing	Translation	ko03010//Ribosome	K02923	GO:0005840//ribosome	GO:0003735//structural constituent of ribosome	GO:0006412//translation
Mesophyll	SK1G00074745	SK1G00074745-RPS25B	0.97038	1.27514	23989	15404	0.345	0.426	0.393997965739857	2.27558178547243e-64	8.38051259953785e-60	up	RPS25B	XP_015612251.1 40S ribosomal protein S25-2 [Oryza sativa Japonica Group]	Genetic Information Processing	Translation	ko03010//Ribosome	K02975	-	GO:0003700//transcription factor activity, sequence-specific DNA binding	GO:0006355//regulation of transcription, DNA-templated
Mesophyll	SK1G00053246	SK1G00053246-ADT6	2.29932	1.83291	23989	15404	0.58	0.51	-0.327052	3.69549992108534e-64	1.36097871093731e-59	down	ADT6	KAF2933846.1 hypothetical protein DAI22_04g117400 [Oryza sativa Japonica Group]	Metabolism;Metabolism;Metabolism;Metabolism	Global and overview maps;Global and overview maps;Global and overview maps;Amino acid metabolism	ko01100//Metabolic pathways;ko01110//Biosynthesis of secondary metabolites;ko01230//Biosynthesis of amino acids;ko00400//Phenylalanine, tyrosine and tryptophan biosynthesis	K05359;K05359;K05359;K05359	-	GO:0004505//phenylalanine 4-monooxygenase activity;GO:0004664//prephenate dehydratase activity	GO:0006559//L-phenylalanine catabolic process;GO:0009094//L-phenylalanine biosynthetic process
Mesophyll	SK1G00071960	SK1G00071960-TYDC	1.64612	1.21978	23989	15404	0.428	0.368	-0.432413	6.23825109548392e-64	2.29742311344482e-59	down	TYDC	XP_015613339.1 tyrosine decarboxylase-like [Oryza sativa Japonica Group]	-	-	-	-	-	GO:0004837//tyrosine decarboxylase activity;GO:0016829//lyase activity;GO:0016831//carboxy-lyase activity;GO:0030170//pyridoxal phosphate binding	GO:0006520//cellular amino acid metabolic process;GO:0006572//tyrosine catabolic process;GO:0015940//pantothenate biosynthetic process;GO:0019752//carboxylic acid metabolic process;GO:0051188//cofactor biosynthetic process
Mesophyll	SK1G00047365	Os03g0207400	1.68602	2.14772	23989	15404	0.457	0.533	0.349164502352565	8.2719234700062e-64	3.04638397553388e-59	up	Os03g0207400	EAY88976.1 hypothetical protein OsI_10462 [Oryza sativa Indica Group]	-	-	-	-	GO:0005887//integral component of plasma membrane;GO:0055052//ATP-binding cassette (ABC) transporter complex, substrate-binding subunit-containing	GO:0015413//nickel-transporting ATPase activity;GO:0016791//phosphatase activity	GO:0015675//nickel cation transport
Mesophyll	SK1G00048117	ATI1	0.875175	0.668606	23989	15404	0.343	0.263	-0.388365	3.90155073035135e-63	1.43686310297379e-58	down	ATI1	XP_015627065.1 ATG8-interacting protein 1 isoform X1 [Oryza sativa Japonica Group]	-	-	-	-	-	-	-
Mesophyll	SK1G00064518	HOX5	1.49898	1.17191	23989	15404	0.482	0.409	-0.355096	1.35084321922775e-62	4.97488540777196e-58	down	HOX5	Q9XH36.1 RecName: Full=Homeobox-leucine zipper protein HOX5; AltName: Full=HD-ZIP protein HOX5; AltName: Full=Homeodomain transcription factor HOX5; AltName: Full=OsHox5 [Oryza sativa Indica Group]	-	-	-	-	-	GO:0003677//DNA binding;GO:0043565//sequence-specific DNA binding	GO:0006260//DNA replication;GO:0006355//regulation of transcription, DNA-templated
Mesophyll	SK1G00065389	RPL7C	1.63021	2.02801	23989	15404	0.509	0.58	0.314993517956549	2.21928910023949e-62	8.173197898362e-58	up	RPL7C	XP_015650122.1 60S ribosomal protein L7-3 [Oryza sativa Japonica Group]	Genetic Information Processing	Translation	ko03010//Ribosome	K02937	GO:0022625//cytosolic large ribosomal subunit	GO:0003735//structural constituent of ribosome	GO:0006412//translation
Mesophyll	SK1G00051160	CSY4	8.39262	6.92764	23989	15404	0.828	0.815	-0.276752	4.60805614713499e-62	1.69705491786688e-57	down	CSY4	AAG28777.1 citrate synthase [Oryza sativa]	Metabolism;Metabolism;Metabolism;Metabolism;Metabolism;Metabolism;Metabolism	Global and overview maps;Global and overview maps;Global and overview maps;Global and overview maps;Carbohydrate metabolism;Carbohydrate metabolism;Global and overview maps	ko01100//Metabolic pathways;ko01110//Biosynthesis of secondary metabolites;ko01200//Carbon metabolism;ko01230//Biosynthesis of amino acids;ko00630//Glyoxylate and dicarboxylate metabolism;ko00020//Citrate cycle (TCA cycle);ko01210//2-Oxocarboxylic acid metabolism	K01647;K01647;K01647;K01647;K01647;K01647;K01647	-	GO:0004108//citrate (Si)-synthase activity;GO:0046912//transferase activity, transferring acyl groups, acyl groups converted into alkyl on transfer	GO:0006099//tricarboxylic acid cycle
Mesophyll	SK1G00064011	BHLH130	1.46319	1.83368	23989	15404	0.482	0.554	0.325602778478166	3.48406597137676e-61	1.28311181593863e-56	up	BHLH130	AAL87667.1 transcription factor RAU1, partial [Oryza sativa]	-	-	-	-	-	GO:0046983//protein dimerization activity	-
Mesophyll	SK1G00061734	SK1G00061734-abkC	0.641343	0.497179	23989	15404	0.282	0.209	-0.367266	1.0021956736056e-60	3.6908862267547e-56	down	abkC	EEC82263.1 hypothetical protein OsI_26459 [Oryza sativa Indica Group]	-	-	-	-	-	GO:0004672//protein kinase activity;GO:0016709//oxidoreductase activity, acting on paired donors, with incorporation or reduction of molecular oxygen, NAD(P)H as one donor, and incorporation of one atom of oxygen	GO:0006468//protein phosphorylation;GO:0006744//ubiquinone biosynthetic process
Mesophyll	SK1G00049124	HMGB3	0.350817	0.529892	23989	15404	0.146	0.21	0.594838293677801	1.43082492091447e-60	5.26944201874382e-56	up	HMGB3	BAB85204.1 high mobility group box protein 2 [Oryza sativa Japonica Group]	-	-	-	-	-	-	-
Mesophyll	SK1G00056117	SK1G00056117	0.554957	0.398249	23989	15404	0.21	0.145	-0.478601	2.00494787160061e-60	7.38382202153073e-56	down	--	AAX96287.1 retrotransposon protein, putative, Ty1-copia sub-class [Oryza sativa Japonica Group]	-	-	-	-	-	-	-
Mesophyll	SK1G00064524	SK1G00064524-CPP1	0.193617	0.301134	23989	15404	0.097	0.152	0.636933912478281	4.61166039761647e-60	1.69838229123419e-55	up	CPP1	XP_015648630.1 protein CHAPERONE-LIKE PROTEIN OF POR1, chloroplastic [Oryza sativa Japonica Group]	-	-	-	-	-	GO:0005515//protein binding	GO:0006457//protein folding;GO:0009408//response to heat
Mesophyll	SK1G00064986	SK1G00064986-RPL7A-1	0.986398	1.26765	23989	15404	0.354	0.435	0.361877379752061	8.68690083334695e-60	3.19921183890501e-55	up	RPL7A-1	XP_015611976.1 60S ribosomal protein L7a-2 [Oryza sativa Japonica Group]	Genetic Information Processing	Translation	ko03010//Ribosome	K02936	GO:0016021//integral component of membrane	-	-
Mesophyll	SK1G00042345	SK1G00042345-GST4	2.18553	1.52871	23989	15404	0.328	0.257	-0.515643	1.26738650578631e-59	4.66753102350981e-55	down	GST4	EEC70603.1 hypothetical protein OsI_01840 [Oryza sativa Indica Group]	Metabolism;Metabolism	Global and overview maps;Metabolism of other amino acids	ko01100//Metabolic pathways;ko00480//Glutathione metabolism	K00799;K00799	-	GO:0005515//protein binding;GO:0016034//maleylacetoacetate isomerase activity	GO:0006559//L-phenylalanine catabolic process;GO:0006572//tyrosine catabolic process;GO:0006749//glutathione metabolic process
Mesophyll	SK1G00071166	SK1G00071166-GSTU6	2.13585	3.07433	23989	15404	0.296	0.369	0.525438447206661	1.34985935907471e-59	4.97126204760032e-55	up	GSTU6	XP_015613723.1 uncharacterized protein LOC4349190 [Oryza sativa Japonica Group]	Metabolism;Metabolism	Global and overview maps;Metabolism of other amino acids	ko01100//Metabolic pathways;ko00480//Glutathione metabolism	K00799;K00799	-	GO:0005515//protein binding;GO:0016034//maleylacetoacetate isomerase activity	GO:0006559//L-phenylalanine catabolic process;GO:0006572//tyrosine catabolic process;GO:0006749//glutathione metabolic process
Mesophyll	SK1G00047549	SK1G00047549-MO2	3.65935	2.94156	23989	15404	0.616	0.549	-0.314994	2.69252685166502e-59	9.91603788931193e-55	down	MO2	EEC74541.1 hypothetical protein OsI_10065 [Oryza sativa Indica Group]	-	-	-	-	GO:0009331//glycerol-3-phosphate dehydrogenase complex;GO:0016021//integral component of membrane	GO:0003824//catalytic activity;GO:0004368//glycerol-3-phosphate dehydrogenase activity;GO:0004506//squalene monooxygenase activity;GO:0004791//thioredoxin-disulfide reductase activity;GO:0015036//disulfide oxidoreductase activity;GO:0016166//phytoene dehydrogenase activity;GO:0016491//oxidoreductase activity;GO:0016647//oxidoreductase activity, acting on the CH-NH group of donors, oxygen as accep…	GO:0006071//glycerol metabolic process;GO:0006744//ubiquinone biosynthetic process;GO:0006790//sulfur compound metabolic process;GO:0009228//thiamine biosynthetic process;GO:0015995//chlorophyll biosynthetic process;GO:0016117//carotenoid biosynthetic process;GO:0018874//benzoate metabolic process;GO:0030494//bacteriochlorophyll biosynthetic process;GO:0055114//oxidation-reduction process
Mesophyll	SK1G00046901	SK1G00046901-CRRSP55	0.528908	0.313778	23989	15404	0.172	0.117	-0.753088	4.69563844588453e-59	1.72930972685035e-54	down	CRRSP55	XP_015628566.1 cysteine-rich repeat secretory protein 55 [Oryza sativa Japonica Group]	-	-	-	-	-	-	-
Mesophyll	SK1G00047869	RPL5	1.97149	2.42603	23989	15404	0.506	0.568	0.299298859609992	6.53742208882627e-59	2.40760180687294e-54	up	RPL5	XP_015627856.1 50S ribosomal protein L5, chloroplastic [Oryza sativa Japonica Group]	Genetic Information Processing	Translation	ko03010//Ribosome	K02931	-	-	-
Mesophyll	SK1G00053778	GAPC2	1.0387	1.32978	23989	15404	0.362	0.441	0.356380885325916	8.88357903565235e-59	3.27164448725005e-54	up	GAPC2	XP_015635626.1 glyceraldehyde-3-phosphate dehydrogenase 2, cytosolic [Oryza sativa Japonica Group]	Metabolism;Metabolism;Metabolism;Metabolism;Metabolism;Metabolism	Global and overview maps;Global and overview maps;Global and overview maps;Global and overview maps;Carbohydrate metabolism;Energy metabolism	ko01100//Metabolic pathways;ko01110//Biosynthesis of secondary metabolites;ko01200//Carbon metabolism;ko01230//Biosynthesis of amino acids;ko00010//Glycolysis / Gluconeogenesis;ko00710//Carbon fixation in photosynthetic organisms	K00134;K00134;K00134;K00134;K00134;K00134	-	GO:0004073//aspartate-semialdehyde dehydrogenase activity;GO:0004617//phosphoglycerate dehydrogenase activity;GO:0008839//4-hydroxy-tetrahydrodipicolinate reductase;GO:0016620//oxidoreductase activity, acting on the aldehyde or oxo group of donors, NAD or NADP as acceptor;GO:0047850//diaminopimelate dehydrogenase activity;GO:0048001//erythrose-4-phosphate dehydrogenase activity;GO:0050112//inosit…	GO:0006094//gluconeogenesis;GO:0006096//glycolytic process;GO:0006564//L-serine biosynthetic process;GO:0008615//pyridoxine biosynthetic process;GO:0009085//lysine biosynthetic process;GO:0009086//methionine biosynthetic process;GO:0009088//threonine biosynthetic process;GO:0009089//lysine biosynthetic process via diaminopimelate;GO:0009097//isoleucine biosynthetic process;GO:0019310//inositol ca…
Mesophyll	SK1G00069652	SK1G00069652-ATL11	1.55858	1.22826	23989	15404	0.489	0.424	-0.343591	9.00575274335611e-59	3.31663862032319e-54	down	ATL11	XP_015619016.1 E3 ubiquitin-protein ligase ATL6 [Oryza sativa Japonica Group]	-	-	-	-	GO:0000109//nucleotide-excision repair complex;GO:0005680//anaphase-promoting complex;GO:0016021//integral component of membrane	GO:0008270//zinc ion binding;GO:0046872//metal ion binding;GO:0061630//ubiquitin protein ligase activity;GO:0097602//cullin family protein binding	GO:0006289//nucleotide-excision repair;GO:0016567//protein ubiquitination;GO:0031145//anaphase-promoting complex-dependent proteasomal ubiquitin-dependent protein catabolic process
Mesophyll	SK1G00042976	DAAT	1.49268	1.88414	23989	15404	0.349	0.43	0.335980545410318	1.07803379801738e-58	3.97018287133841e-54	up	DAAT	XP_015621951.1 D-amino-acid transaminase, chloroplastic isoform X1 [Oryza sativa Japonica Group]	Metabolism	Metabolism of cofactors and vitamins	ko00790//Folate biosynthesis	K18482	-	GO:0003824//catalytic activity;GO:0004084//branched-chain-amino-acid transaminase activity;GO:0008696//4-amino-4-deoxychorismate lyase activity;GO:0047810//D-alanine:2-oxoglutarate aminotransferase activity	GO:0008153//para-aminobenzoic acid biosynthetic process;GO:0009082//branched-chain amino acid biosynthetic process;GO:0009396//folic acid-containing compound biosynthetic process;GO:0019480//L-alanine oxidation to pyruvate via D-alanine
Mesophyll	SK1G00046627	CRRSP55	2.06337	1.48051	23989	15404	0.395	0.326	-0.478875	1.52244252358894e-58	5.60685132587336e-54	down	CRRSP55	KAB8091519.1 hypothetical protein EE612_017025 [Oryza sativa]	-	-	-	-	-	-	-
Mesophyll	SK1G00064144	PA1024	3.03809	3.75188	23989	15404	0.58	0.649	0.304440339570695	1.79530191349079e-58	6.61173788700387e-54	up	PA1024	XP_015650725.1 uncharacterized protein LOC4345877 isoform X1 [Oryza sativa Japonica Group]	-	-	-	-	-	GO:0003824//catalytic activity;GO:0003938//IMP dehydrogenase activity;GO:0003949//1-(5-phosphoribosyl)-5-[(5-phosphoribosylamino)methylideneamino]imidazole-4-carboxamide isomerase activity;GO:0004452//isopentenyl-diphosphate delta-isomerase activity;GO:0016491//oxidoreductase activity;GO:0018580//nitronate monooxygenase activity	GO:0000105//histidine biosynthetic process;GO:0000398//mRNA splicing, via spliceosome;GO:0008299//isoprenoid biosynthetic process;GO:0009152//purine ribonucleotide biosynthetic process;GO:0055114//oxidation-reduction process
Mesophyll	SK1G00058114	SK1G00058114-At1g74260	3.41296	2.75452	23989	15404	0.641	0.588	-0.309209	2.10373300403844e-58	7.74762790727276e-54	down	At1g74260	XP_015640094.1 probable phosphoribosylformylglycinamidine synthase, chloroplastic/mitochondrial [Oryza sativa Japonica Group]	Metabolism;Metabolism;Metabolism	Global and overview maps;Global and overview maps;Nucleotide metabolism	ko01100//Metabolic pathways;ko01110//Biosynthesis of secondary metabolites;ko00230//Purine metabolism	K01952;K01952;K01952	-	GO:0003824//catalytic activity;GO:0004642//phosphoribosylformylglycinamidine synthase activity;GO:0005515//protein binding	GO:0006189//'de novo' IMP biosynthetic process;GO:0009058//biosynthetic process;GO:0009152//purine ribonucleotide biosynthetic process;GO:0015948//methanogenesis
Mesophyll	SK1G00066508	RPS29	0.972585	1.2511	23989	15404	0.32	0.399	0.36326804609966	3.21936371728439e-58	1.1856272698015e-53	up	RPS29	TVU24005.1 hypothetical protein EJB05_26397, partial [Eragrostis curvula]	Genetic Information Processing	Translation	ko03010//Ribosome	K02980	GO:0005840//ribosome	GO:0003735//structural constituent of ribosome	GO:0006412//translation
Mesophyll	SK1G00060320	SK1G00060320-UBI11	12.3495	9.97644	23989	15404	0.876	0.865	-0.307857	3.70105707969122e-58	1.36302530130868e-53	down	UBI11	XP_022681640.1 polyubiquitin [Setaria italica]	-	-	-	-	GO:0005576//extracellular region;GO:0005737//cytoplasm	GO:0000166//nucleotide binding;GO:0003980//UDP-glucose:glycoprotein glucosyltransferase activity;GO:0004827//proline-tRNA ligase activity;GO:0005515//protein binding;GO:0005524//ATP binding	GO:0006289//nucleotide-excision repair;GO:0006433//prolyl-tRNA aminoacylation;GO:0006486//protein glycosylation;GO:0009405//pathogenesis;GO:0031639//plasminogen activation
Mesophyll	SK1G00064473	SK1G00064473-CM2	3.75433	3.01476	23989	15404	0.606	0.573	-0.316503	5.15901602331957e-58	1.89996242106813e-53	down	CM2	XP_015649134.1 chorismate mutase 2 [Oryza sativa Japonica Group]	Metabolism;Metabolism;Metabolism;Metabolism	Global and overview maps;Global and overview maps;Global and overview maps;Amino acid metabolism	ko01100//Metabolic pathways;ko01110//Biosynthesis of secondary metabolites;ko01230//Biosynthesis of amino acids;ko00400//Phenylalanine, tyrosine and tryptophan biosynthesis	K01850;K01850;K01850;K01850	-	GO:0004106//chorismate mutase activity	-
Mesophyll	SK1G00061841	SK1G00061841-At4g29360	1.38762	0.993006	23989	15404	0.338	0.269	-0.482699	5.96361376649112e-58	2.19627967792335e-53	down	At4g29360	EEC82204.1 hypothetical protein OsI_26347 [Oryza sativa Indica Group]	-	-	-	-	-	GO:0004553//hydrolase activity, hydrolyzing O-glycosyl compounds	GO:0005975//carbohydrate metabolic process
Mesophyll	SK1G00042547	PME41	10.7218	8.55671	23989	15404	0.778	0.741	-0.325419	2.09844119122823e-57	7.72813921905534e-53	down	PME41	XP_015625464.1 probable pectinesterase/pectinesterase inhibitor 41 [Oryza sativa Japonica Group]	Metabolism;Metabolism	Global and overview maps;Carbohydrate metabolism	ko01100//Metabolic pathways;ko00040//Pentose and glucuronate interconversions	K01051;K01051	-	GO:0004857//enzyme inhibitor activity;GO:0030599//pectinesterase activity	GO:0042545//cell wall modification
Mesophyll	SK1G00056738	SK1G00056738-GSVIVT00023967001	1.2411	0.837218	23989	15404	0.273	0.21	-0.567884	2.92629606160265e-57	1.07769631356703e-52	down	GSVIVT00023967001	EAZ01154.1 hypothetical protein OsI_23183 [Oryza sativa Indica Group]	Metabolism;Metabolism;Metabolism	Global and overview maps;Global and overview maps;Biosynthesis of other secondary metabolites	ko01100//Metabolic pathways;ko01110//Biosynthesis of secondary metabolites;ko00940//Phenylpropanoid biosynthesis	K00430;K00430;K00430	-	GO:0004601//peroxidase activity;GO:0020037//heme binding	GO:0006979//response to oxidative stress;GO:0055114//oxidation-reduction process
Mesophyll	SK1G00047666	OsI_09857	0.552014	0.755124	23989	15404	0.198	0.268	0.451940035512299	5.45929611559472e-57	2.01054957345122e-52	up	OsI_09857	XP_015629749.1 catalase-1 [Oryza sativa Japonica Group]	Metabolism;Metabolism;Metabolism;Environmental Information Processing;Cellular Processes;Metabolism;Metabolism	Global and overview maps;Global and overview maps;Global and overview maps;Signal transduction;Transport and catabolism;Carbohydrate metabolism;Amino acid metabolism	ko01100//Metabolic pathways;ko01110//Biosynthesis of secondary metabolites;ko01200//Carbon metabolism;ko04016//MAPK signaling pathway - plant;ko04146//Peroxisome;ko00630//Glyoxylate and dicarboxylate metabolism;ko00380//Tryptophan metabolism	K03781;K03781;K03781;K03781;K03781;K03781;K03781	-	GO:0004096//catalase activity;GO:0020037//heme binding	GO:0055114//oxidation-reduction process
Mesophyll	SK1G00041151	PRXIIC	2.01189	2.46818	23989	15404	0.53	0.605	0.294879770302891	2.52705686830622e-56	9.30664503459814e-52	up	PRXIIC	XP_015622003.1 peroxiredoxin-2C [Oryza sativa Japonica Group]	-	-	-	-	GO:0009427//bacterial-type flagellum basal body, distal rod, L ring	GO:0003774//motor activity;GO:0016209//antioxidant activity;GO:0016491//oxidoreductase activity;GO:0051920//peroxiredoxin activity	GO:0006979//response to oxidative stress;GO:0055114//oxidation-reduction process;GO:0071973//bacterial-type flagellum-dependent cell motility
Mesophyll	SK1G00061838	SK1G00061838-At4g29360	0.980819	0.721071	23989	15404	0.331	0.262	-0.443793	3.42396676628621e-56	1.26097848068789e-51	down	At4g29360	XP_015647406.1 glucan endo-1,3-beta-glucosidase 12 [Oryza sativa Japonica Group]	-	-	-	-	-	GO:0004553//hydrolase activity, hydrolyzing O-glycosyl compounds	GO:0005975//carbohydrate metabolic process
Mesophyll	SK1G00039800	SK1G00039800	1.14959	0.825599	23989	15404	0.333	0.272	-0.477551	3.57304808255467e-56	1.31588214784323e-51	down	--	XP_015630051.1 uncharacterized protein LOC4324903 [Oryza sativa Japonica Group]	-	-	-	-	-	-	-
Mesophyll	SK1G00056217	CYP76C2	1.51025	0.998153	23989	15404	0.272	0.209	-0.597402	4.93755552335386e-56	1.81840294814076e-51	down	CYP76C2	EAZ00595.1 hypothetical protein OsI_22616 [Oryza sativa Indica Group]	-	-	-	-	-	GO:0005506//iron ion binding;GO:0016705//oxidoreductase activity, acting on paired donors, with incorporation or reduction of molecular oxygen;GO:0020037//heme binding	GO:0055114//oxidation-reduction process
Mesophyll	SK1G00048275	SK1G00048275-CYCB1-2	1.01223	1.29555	23989	15404	0.376	0.449	0.35599818372735	5.59277750100076e-56	2.05970809806856e-51	up	CYCB1-2	XP_015626577.1 cyclin-B1-2-like [Oryza sativa Japonica Group]	Genetic Information Processing	Folding, sorting and degradation	ko03050//Proteasome	K11599	-	-	GO:0043248//proteasome assembly
Mesophyll	SK1G00064328	4CL5	10.1473	8.40117	23989	15404	0.819	0.776	-0.272435	9.88014434976325e-56	3.63865956113081e-51	down	4CL5	EAZ07174.1 hypothetical protein OsI_29419 [Oryza sativa Indica Group]	Metabolism;Metabolism;Metabolism;Metabolism	Global and overview maps;Global and overview maps;Biosynthesis of other secondary metabolites;Metabolism of cofactors and vitamins	ko01100//Metabolic pathways;ko01110//Biosynthesis of secondary metabolites;ko00940//Phenylpropanoid biosynthesis;ko00130//Ubiquinone and other terpenoid-quinone biosynthesis	K01904;K01904;K01904;K01904	-	GO:0003987//acetate-CoA ligase activity;GO:0004043//L-aminoadipate-semialdehyde dehydrogenase activity;GO:0008668//(2,3-dihydroxybenzoyl)adenylate synthase activity;GO:0008756//o-succinylbenzoate-CoA ligase activity;GO:0030729//acetoacetate-CoA ligase activity;GO:0047473//D-alanine-poly(phosphoribitol) ligase activity;GO:0050218//propionate-CoA ligase activity	GO:0009234//menaquinone biosynthetic process;GO:0019287//isopentenyl diphosphate biosynthetic process, mevalonate pathway;GO:0019290//siderophore biosynthetic process;GO:0019350//teichoic acid biosynthetic process;GO:0019427//acetyl-CoA biosynthetic process from acetate;GO:0019878//lysine biosynthetic process via aminoadipic acid
Mesophyll	SK1G00048249	At5g35200	1.62839	2.00099	23989	15404	0.509	0.579	0.297249785247408	1.88488213774279e-55	6.94164393687915e-51	up	At5g35200	EEC74189.1 hypothetical protein OsI_09327 [Oryza sativa Indica Group]	-	-	-	-	-	GO:0005543//phospholipid binding	-
Mesophyll	SK1G00046409	MTACP2	0.189692	0.297806	23989	15404	0.094	0.147	0.650433438595321	2.07489714767943e-55	7.64143121547381e-51	up	MTACP2	XP_015632715.1 acyl carrier protein 2, mitochondrial isoform X1 [Oryza sativa Japonica Group]	Metabolism;Metabolism	Global and overview maps;Energy metabolism	ko01100//Metabolic pathways;ko00190//Oxidative phosphorylation	K03955;K03955	GO:0005575//cellular_component	GO:0000036//ACP phosphopantetheine attachment site binding involved in fatty acid biosynthetic process;GO:0003674//molecular_function;GO:0047473//D-alanine-poly(phosphoribitol) ligase activity	GO:0006633//fatty acid biosynthetic process;GO:0019350//teichoic acid biosynthetic process;GO:0030152//bacteriocin biosynthetic process
Mesophyll	SK1G00050716	RPL27C	1.01697	1.28582	23989	15404	0.389	0.462	0.338383361895972	2.24780046630845e-55	8.27819955732076e-51	up	RPL27C	XP_015627615.1 60S ribosomal protein L27-3 [Oryza sativa Japonica Group]	Genetic Information Processing	Translation	ko03010//Ribosome	K02901	GO:0005840//ribosome	GO:0003735//structural constituent of ribosome	GO:0006412//translation
Mesophyll	SK1G00040050	OFUT19	1.74366	1.39685	23989	15404	0.524	0.464	-0.319922	2.26885296158112e-55	8.35573168691095e-51	down	OFUT19	EEC71817.1 hypothetical protein OsI_04456 [Oryza sativa Indica Group]	-	-	-	-	-	-	-
Mesophyll	SK1G00071137	SK1G00071137-At4g00750	0.169746	0.268312	23989	15404	0.087	0.138	0.660224242266731	6.79770077820282e-55	2.50345724259653e-50	up	At4g00750	EAY79246.1 hypothetical protein OsI_34362 [Oryza sativa Indica Group]	-	-	-	-	-	GO:0008168//methyltransferase activity	-
Mesophyll	SK1G00055602	RPL39C	1.01358	1.29119	23989	15404	0.372	0.446	0.349206934420865	7.07833724992991e-55	2.60681004240419e-50	up	RPL39C	KAF0901916.1 hypothetical protein E2562_011756 [Oryza meyeriana var. granulata] [Oryza meyeriana]	Genetic Information Processing	Translation	ko03010//Ribosome	K02924	GO:0005840//ribosome	GO:0003735//structural constituent of ribosome	GO:0006412//translation
Mesophyll	SK1G00039959	SK1G00039959	2.99883	2.48601	23989	15404	0.66	0.602	-0.270556	1.32825402868964e-54	4.8916939368582e-50	down	--	BAB63813.1 putative harpin inducing protein [Oryza sativa Japonica Group]	-	-	-	-	-	-	-
Mesophyll	SK1G00069025	SK1G00069025-PUB24	2.15129	2.58693	23989	15404	0.594	0.653	0.266024782098003	1.33205674003018e-54	4.90569856218317e-50	up	PUB24	XP_015618963.1 E3 ubiquitin-protein ligase PUB23 [Oryza sativa Japonica Group]	-	-	-	-	-	GO:0004121//cystathionine beta-lyase activity;GO:0004842//ubiquitin-protein transferase activity;GO:0008270//zinc ion binding	GO:0009086//methionine biosynthetic process;GO:0016567//protein ubiquitination
Mesophyll	SK1G00040408	SBT3.5	0.610436	0.38814	23989	15404	0.19	0.133	-0.653128	2.39646652250512e-54	8.82570690908185e-50	down	SBT3.5	EEC71630.1 hypothetical protein OsI_04057 [Oryza sativa Indica Group]	-	-	-	-	-	GO:0008233//peptidase activity;GO:0008236//serine-type peptidase activity	GO:0006508//proteolysis;GO:0009306//protein secretion
Mesophyll	SK1G00075016	SK1G00075016-CYSK	1.05308	0.794048	23989	15404	0.374	0.311	-0.407268	4.82366466105111e-54	1.7764592213719e-49	down	CYSK	XP_015619253.1 cysteine synthase [Oryza sativa Japonica Group]	Metabolism;Metabolism;Metabolism;Metabolism;Metabolism;Metabolism	Global and overview maps;Global and overview maps;Global and overview maps;Global and overview maps;Amino acid metabolism;Energy metabolism	ko01100//Metabolic pathways;ko01110//Biosynthesis of secondary metabolites;ko01200//Carbon metabolism;ko01230//Biosynthesis of amino acids;ko00270//Cysteine and methionine metabolism;ko00920//Sulfur metabolism	K01738;K01738;K01738;K01738;K01738;K01738	-	GO:0004122//cystathionine beta-synthase activity;GO:0004124//cysteine synthase activity;GO:0004794//L-threonine ammonia-lyase activity;GO:0004795//threonine synthase activity;GO:0004834//tryptophan synthase activity;GO:0008838//diaminopropionate ammonia-lyase activity;GO:0030170//pyridoxal phosphate binding	GO:0000162//tryptophan biosynthetic process;GO:0006535//cysteine biosynthetic process from serine;GO:0006549//isoleucine metabolic process;GO:0008152//metabolic process;GO:0009058//biosynthetic process;GO:0009088//threonine biosynthetic process;GO:0009097//isoleucine biosynthetic process;GO:0019344//cysteine biosynthetic process;GO:0042400//ectoine catabolic process;GO:0055114//oxidation-reductio…
Mesophyll	SK1G00035591	THT1	3.28449	2.66935	23989	15404	0.617	0.575	-0.29917	5.8063470409997e-54	2.13836148825937e-49	down	THT1	XP_015613139.1 tryptamine hydroxycinnamoyltransferase 1 [Oryza sativa Japonica Group]	-	-	-	-	-	GO:0003824//catalytic activity;GO:0016747//transferase activity, transferring acyl groups other than amino-acyl groups	-
Mesophyll	SK1G00040452	FQR1	8.78678	6.70295	23989	15404	0.615	0.568	-0.390532	6.75405178025971e-54	2.48738218963404e-49	down	FQR1	EAY76084.1 hypothetical protein OsI_04011 [Oryza sativa Indica Group]	Metabolism;Metabolism;Metabolism	Global and overview maps;Global and overview maps;Metabolism of cofactors and vitamins	ko01100//Metabolic pathways;ko01110//Biosynthesis of secondary metabolites;ko00130//Ubiquinone and other terpenoid-quinone biosynthesis	K03809;K03809;K03809	-	GO:0003955//NAD(P)H dehydrogenase (quinone) activity;GO:0009055//electron carrier activity;GO:0010181//FMN binding;GO:0016491//oxidoreductase activity	GO:0055114//oxidation-reduction process
Mesophyll	SK1G00050031	SK1G00050031	0.450841	0.635613	23989	15404	0.195	0.259	0.495436283443029	7.41947821053062e-54	2.73244543537422e-49	up	--	BAF08895.1 Os02g0522300 [Oryza sativa Japonica Group]	-	-	-	-	GO:0005680//anaphase-promoting complex	GO:0008270//zinc ion binding;GO:0061630//ubiquitin protein ligase activity;GO:0097602//cullin family protein binding	GO:0031145//anaphase-promoting complex-dependent proteasomal ubiquitin-dependent protein catabolic process
Mesophyll	SK1G00060487	At1g80170	2.30203	1.87825	23989	15404	0.563	0.494	-0.293503	1.43188010574145e-53	5.27332805342462e-49	down	At1g80170	XP_015640423.1 probable polygalacturonase At1g80170 [Oryza sativa Japonica Group]	Metabolism;Metabolism	Global and overview maps;Carbohydrate metabolism	ko01100//Metabolic pathways;ko00040//Pentose and glucuronate interconversions	K01213;K01213	-	GO:0004650//polygalacturonase activity	GO:0005975//carbohydrate metabolic process
Mesophyll	SK1G00062922	SK1G00062922-RPS15AA	1.33736	1.64774	23989	15404	0.424	0.501	0.301082426907556	2.23661747661755e-53	8.2370148428871e-49	up	RPS15AA	XP_006657549.1 PREDICTED: 40S ribosomal protein S15a-1-like [Oryza brachyantha]	Genetic Information Processing	Translation	ko03010//Ribosome	K02957	GO:0005840//ribosome	GO:0003735//structural constituent of ribosome	GO:0006412//translation
Mesophyll	SK1G00041611	D14	0.311737	0.507337	23989	15404	0.083	0.132	0.702434490477875	3.08589839450546e-53	1.13647466072847e-48	up	D14	XP_015650138.1 probable esterase KAI2 [Oryza sativa Japonica Group]	-	-	-	-	-	GO:0003674//molecular_function;GO:0003824//catalytic activity;GO:0047570//3-oxoadipate enol-lactonase activity;GO:0070205//2-succinyl-6-hydroxy-2,4-cyclohexadiene-1-carboxylate synthase activity	GO:0009102//biotin biosynthetic process;GO:0009234//menaquinone biosynthetic process;GO:0015979//photosynthesis;GO:0042952//beta-ketoadipate pathway
Mesophyll	SK1G00039624	RBG4	1.31531	1.68043	23989	15404	0.404	0.466	0.353404765697485	4.44364920951531e-53	1.6365071308803e-48	up	RBG4	XP_015622053.1 glycine-rich RNA-binding protein 4, mitochondrial [Oryza sativa Japonica Group]	-	-	-	-	-	GO:0003676//nucleic acid binding	GO:0008380//RNA splicing
Mesophyll	SK1G00043516	RPL26A	0.285031	0.409597	23989	15404	0.139	0.199	0.522933648169509	5.23260747583076e-53	1.92706468119895e-48	up	RPL26A	XP_015621469.1 60S ribosomal protein L26-1 [Oryza sativa Japonica Group]	Genetic Information Processing	Translation	ko03010//Ribosome	K02898	GO:0000315//organellar large ribosomal subunit;GO:0015934//large ribosomal subunit;GO:0022625//cytosolic large ribosomal subunit	GO:0003735//structural constituent of ribosome	GO:0006412//translation
Mesophyll	SK1G00060551	SK1G00060551-MYB36	5.98247	4.90215	23989	15404	0.682	0.632	-0.287321	5.90942123964532e-53	2.17632165413658e-48	down	MYB36	XP_015637875.1 transcription factor RAX2 [Oryza sativa Japonica Group]	-	-	-	-	-	-	-
Mesophyll	SK1G00064288	GER5	1.37314	0.994655	23989	15404	0.329	0.259	-0.46517	6.31828837784879e-53	2.32689924379415e-48	down	GER5	XP_015648639.1 germin-like protein 8-14 [Oryza sativa Japonica Group]	-	-	-	-	-	GO:0003677//DNA binding;GO:0003700//transcription factor activity, sequence-specific DNA binding;GO:0004519//endonuclease activity;GO:0010309//acireductone dioxygenase [iron(II)-requiring] activity;GO:0016702//oxidoreductase activity, acting on single donors with incorporation of molecular oxygen, incorporation of two atoms of oxygen;GO:0047922//gentisate 1,2-dioxygenase activity	GO:0006304//DNA modification;GO:0055114//oxidation-reduction process
Mesophyll	SK1G00042117	OsI_002060	2.94884	3.93694	23989	15404	0.362	0.435	0.416915658115285	8.41932144510354e-53	3.10066770180273e-48	up	OsI_002060	XP_015629887.1 probable histone H2A.5 [Oryza sativa Japonica Group]	-	-	-	-	-	GO:0003677//DNA binding;GO:0005096//GTPase activator activity	-
Mesophyll	SK1G00064021	SK1G00064021-RPL31	1.47851	1.79197	23989	15404	0.512	0.581	0.277384558516515	1.23647022759042e-52	4.55367255416999e-48	up	RPL31	XP_015650376.1 60S ribosomal protein L31 [Oryza sativa Japonica Group]	Genetic Information Processing	Translation	ko03010//Ribosome	K02910	GO:0005840//ribosome	GO:0003735//structural constituent of ribosome	GO:0006412//translation
Mesophyll	SK1G00058830	TIP4-1	0.407638	0.590044	23989	15404	0.151	0.212	0.533424580486887	4.99513681686176e-52	1.83960898691385e-47	up	TIP4-1	XP_015640527.1 probable aquaporin TIP4-1 [Oryza sativa Japonica Group]	-	-	-	-	GO:0016020//membrane	GO:0008168//methyltransferase activity;GO:0015267//channel activity	GO:0032259//methylation;GO:0055085//transmembrane transport
Mesophyll	SK1G00039611	SUMO1	1.89836	2.40488	23989	15404	0.47	0.533	0.341195570839969	8.5584775930654e-52	3.15191612797413e-47	up	SUMO1	P55857.1 RecName: Full=Small ubiquitin-related modifier 1; Short=OsSUMO1; AltName: Full=Ubiquitin-like protein SMT3 [Oryza sativa Japonica Group]	Genetic Information Processing	Translation	ko03013//RNA transport	K12160	-	GO:0005515//protein binding	-
Mesophyll	SK1G00069547	Z-ISO	0.135877	0.225381	23989	15404	0.072	0.117	0.729650194966985	2.46149849098831e-51	9.06520664261174e-47	up	Z-ISO	XP_015618246.1 15-cis-zeta-carotene isomerase, chloroplastic [Oryza sativa Japonica Group]	Metabolism;Metabolism;Metabolism	Global and overview maps;Global and overview maps;Metabolism of terpenoids and polyketides	ko01100//Metabolic pathways;ko01110//Biosynthesis of secondary metabolites;ko00906//Carotenoid biosynthesis	K15744;K15744;K15744	GO:0016021//integral component of membrane	GO:0004671//protein C-terminal S-isoprenylcysteine carboxyl O-methyltransferase activity	GO:0006481//C-terminal protein methylation
Mesophyll	SK1G00050120	SK1G00050120	0.119845	0.197114	23989	15404	0.064	0.107	0.717386201251415	2.94856259627378e-51	1.08589663295571e-46	up	--	XP_015627685.1 uncharacterized protein LOC4329441 isoform X2 [Oryza sativa Japonica Group]	-	-	-	-	-	-	-
Mesophyll	SK1G00051906	COMTL2	1.43694	1.1075	23989	15404	0.299	0.23	-0.375664	7.81516015734661e-51	2.87816718274761e-46	down	COMTL2	XP_015634433.1 caffeate O-methyltransferase-like protein 2 [Oryza sativa Japonica Group]	-	-	-	-	-	GO:0003677//DNA binding;GO:0008168//methyltransferase activity;GO:0008171//O-methyltransferase activity;GO:0046983//protein dimerization activity	GO:0006355//regulation of transcription, DNA-templated;GO:0006480//N-terminal protein amino acid methylation;GO:0016051//carbohydrate biosynthetic process;GO:0032259//methylation
Mesophyll	SK1G00051003	CSY3	1.3623	1.68928	23989	15404	0.453	0.518	0.310348481353868	9.28308334955844e-51	3.41877393597538e-46	up	CSY3	EEC72787.1 hypothetical protein OsI_06467 [Oryza sativa Indica Group]	Metabolism;Metabolism;Metabolism;Metabolism;Metabolism;Metabolism;Metabolism	Global and overview maps;Global and overview maps;Global and overview maps;Global and overview maps;Carbohydrate metabolism;Carbohydrate metabolism;Global and overview maps	ko01100//Metabolic pathways;ko01110//Biosynthesis of secondary metabolites;ko01200//Carbon metabolism;ko01230//Biosynthesis of amino acids;ko00630//Glyoxylate and dicarboxylate metabolism;ko00020//Citrate cycle (TCA cycle);ko01210//2-Oxocarboxylic acid metabolism	K01647;K01647;K01647;K01647;K01647;K01647;K01647	-	GO:0004108//citrate (Si)-synthase activity;GO:0046912//transferase activity, transferring acyl groups, acyl groups converted into alkyl on transfer	GO:0006099//tricarboxylic acid cycle
Mesophyll	SK1G00041763	IQM1	4.54256	3.72511	23989	15404	0.723	0.683	-0.286216	9.48883128707694e-51	3.49454678640469e-46	down	IQM1	XP_015622418.1 IQ domain-containing protein IQM1 isoform X2 [Oryza sativa Japonica Group]	-	-	-	-	-	GO:0005515//protein binding	-
Mesophyll	SK1G00068025	SK1G00068025-HCT4	1.04097	1.37529	23989	15404	0.236	0.305	0.401767530915246	1.6441774417221e-50	6.05517668237416e-46	up	HCT4	BAT12957.1 Os11g0182200 [Oryza sativa Japonica Group]	Metabolism;Metabolism;Metabolism;Metabolism;Metabolism	Global and overview maps;Global and overview maps;Biosynthesis of other secondary metabolites;Biosynthesis of other secondary metabolites;Biosynthesis of other secondary metabolites	ko01100//Metabolic pathways;ko01110//Biosynthesis of secondary metabolites;ko00940//Phenylpropanoid biosynthesis;ko00941//Flavonoid biosynthesis;ko00945//Stilbenoid, diarylheptanoid and gingerol biosynthesis	K13065;K13065;K13065;K13065;K13065	-	GO:0016747//transferase activity, transferring acyl groups other than amino-acyl groups	-
Mesophyll	SK1G00046778	SK1G00046778-RPS7	0.533965	0.7081	23989	15404	0.237	0.306	0.407142918349427	2.00464128351356e-50	7.38269291892374e-46	up	RPS7	XP_015631395.1 40S ribosomal protein S7-like [Oryza sativa Japonica Group]	Genetic Information Processing	Translation	ko03010//Ribosome	K02993	GO:0005840//ribosome	GO:0003735//structural constituent of ribosome	GO:0006412//translation
Mesophyll	SK1G00061753	At4g05010	3.35904	4.14028	23989	15404	0.583	0.648	0.301672690153943	8.09942201201461e-50	2.98285513858474e-45	up	At4g05010	XP_015645738.1 F-box protein At4g05010 [Oryza sativa Japonica Group]	-	-	-	-	-	GO:0005515//protein binding	-
Mesophyll	SK1G00067922	At4g00960	1.99284	1.55085	23989	15404	0.413	0.341	-0.361741	1.04164192686769e-49	3.83615888826831e-45	down	At4g00960	XP_015616470.1 serine/threonine-protein kinase 3 [Oryza sativa Japonica Group]	-	-	-	-	-	GO:0004672//protein kinase activity;GO:0005515//protein binding;GO:0005524//ATP binding	GO:0006468//protein phosphorylation
Mesophyll	SK1G00047955	EARLI1	0.484059	0.320574	23989	15404	0.188	0.134	-0.594375	3.96078713840374e-49	1.45867868733133e-44	down	EARLI1	BAJ08376.1 qLTG3-1 [Oryza sativa Indica Group]	-	-	-	-	-	-	-
Mesophyll	SK1G00053047	DTX16	0.240613	0.326287	23989	15404	0.09	0.136	0.439268920710801	4.57630747864637e-49	1.68536251823588e-44	up	DTX16	XP_015633541.1 protein DETOXIFICATION 16 [Oryza sativa Japonica Group]	-	-	-	-	GO:0016020//membrane	GO:0015238//drug transmembrane transporter activity;GO:0015297//antiporter activity;GO:0042910//xenobiotic transporter activity	GO:0006855//drug transmembrane transport;GO:0042493//response to drug;GO:0055085//transmembrane transport
Mesophyll	SK1G00045962	RIPK	1.9138	1.55043	23989	15404	0.535	0.479	-0.30375	8.60698197576888e-49	3.16977932203616e-44	down	RIPK	AAP12978.1 putative serine/threonine protein kinase [Oryza sativa Japonica Group]	-	-	-	-	-	GO:0004672//protein kinase activity;GO:0005524//ATP binding	GO:0006468//protein phosphorylation
Mesophyll	SK1G00061478	TIF5A	1.50736	1.83385	23989	15404	0.472	0.539	0.282838021668703	2.96994213541442e-48	1.09377028963042e-43	up	TIF5A	EEC82388.1 hypothetical protein OsI_26733 [Oryza sativa Indica Group]	-	-	-	-	GO:0005737//cytoplasm	GO:0003723//RNA binding;GO:0003746//translation elongation factor activity;GO:0043022//ribosome binding	GO:0006414//translational elongation;GO:0045901//positive regulation of translational elongation;GO:0045905//positive regulation of translational termination
Mesophyll	SK1G00075255	SK1G00075255-COX3	0.377101	0.556287	23989	15404	0.143	0.199	0.560754844601603	5.72650014963082e-48	2.10895547510604e-43	up	COX3	YP_514631.1 cytochrome c oxidase subunit 3 [Oryza sativa Indica Group]	Metabolism;Metabolism	Global and overview maps;Energy metabolism	ko01100//Metabolic pathways;ko00190//Oxidative phosphorylation	K02262;K02262	GO:0016020//membrane;GO:0016021//integral component of membrane	GO:0008827//cytochrome o ubiquinol oxidase activity;GO:0015002//heme-copper terminal oxidase activity;GO:0015078//hydrogen ion transmembrane transporter activity;GO:0016682//oxidoreductase activity, acting on diphenols and related substances as donors, oxygen as acceptor	GO:0015990//electron transport coupled proton transport;GO:0055114//oxidation-reduction process
Mesophyll	SK1G00054246	HMGB2	1.50277	1.82252	23989	15404	0.495	0.561	0.278291748072524	1.20235981326088e-47	4.42805072027718e-43	up	HMGB2	XP_015637123.1 DNA-binding protein MNB1B isoform X1 [Oryza sativa Japonica Group]	-	-	-	-	-	-	-
Mesophyll	SK1G00042369	RPL23A	0.768309	1.00519	23989	15404	0.288	0.354	0.387660688633978	1.28028792446955e-47	4.71504436823646e-43	up	RPL23A	XP_015622490.1 60S ribosomal protein L23A [Oryza sativa Japonica Group]	Genetic Information Processing	Translation	ko03010//Ribosome	K02893	GO:0005840//ribosome;GO:0022625//cytosolic large ribosomal subunit	GO:0003735//structural constituent of ribosome	GO:0006412//translation
Mesophyll	SK1G00039391	SK1G00039391	1.21917	0.944529	23989	15404	0.412	0.356	-0.368201	1.54347171144941e-47	5.68429761892588e-43	down	--	XP_015612726.1 uncharacterized protein LOC4325751 [Oryza sativa Japonica Group]	-	-	-	-	-	-	-
Mesophyll	SK1G00048582	ERF060	1.45987	1.07742	23989	15404	0.378	0.319	-0.438219	2.36067988654505e-47	8.6939118861681e-43	down	ERF060	EEC74022.1 hypothetical protein OsI_08968 [Oryza sativa Indica Group]	-	-	-	-	-	GO:0003700//transcription factor activity, sequence-specific DNA binding	GO:0006355//regulation of transcription, DNA-templated
Mesophyll	SK1G00055222	OsI_21475	0.842086	0.623825	23989	15404	0.302	0.242	-0.432766	3.19467234781409e-47	1.17653393225297e-42	down	OsI_21475	XP_015643652.1 SPX domain-containing membrane protein Os06g0129400 [Oryza sativa Japonica Group]	-	-	-	-	GO:0000775//chromosome, centromeric region;GO:0005887//integral component of plasma membrane;GO:0016021//integral component of membrane	GO:0003677//DNA binding;GO:0003682//chromatin binding;GO:0022857//transmembrane transporter activity;GO:0051119//sugar transmembrane transporter activity	GO:0008643//carbohydrate transport;GO:0055085//transmembrane transport
Mesophyll	SK1G00065403	SK1G00065403-XTH8	1.88221	2.51151	23989	15404	0.386	0.434	0.416108134414246	3.57984887835409e-46	1.31838674492024e-41	up	XTH8	EAZ06114.1 hypothetical protein OsI_28350 [Oryza sativa Indica Group]	-	-	-	-	GO:0005618//cell wall;GO:0048046//apoplast	GO:0004553//hydrolase activity, hydrolyzing O-glycosyl compounds;GO:0016762//xyloglucan:xyloglucosyl transferase activity	GO:0005975//carbohydrate metabolic process;GO:0006073//cellular glucan metabolic process
Mesophyll	SK1G00039592	TOM20	0.328954	0.465887	23989	15404	0.159	0.216	0.501965955204024	5.86047579966565e-46	2.15829602750087e-41	up	TOM20	A2WYG9.2 RecName: Full=Probable mitochondrial import receptor subunit TOM20; AltName: Full=Translocase of outer membrane 20 kDa subunit [Oryza sativa Indica Group]	-	-	-	-	-	GO:0005515//protein binding	-
Mesophyll	SK1G00063653	RPS25B	1.48254	1.80001	23989	15404	0.453	0.524	0.279911725944949	6.36750218755407e-46	2.34502370563241e-41	up	RPS25B	XP_015649393.1 40S ribosomal protein S25-2 [Oryza sativa Japonica Group]	Genetic Information Processing	Translation	ko03010//Ribosome	K02975	-	GO:0003700//transcription factor activity, sequence-specific DNA binding	GO:0006355//regulation of transcription, DNA-templated
Mesophyll	SK1G00061972	SK1G00061972-HIDM	0.582419	0.383109	23989	15404	0.191	0.142	-0.604171	7.57202652646458e-46	2.78862592916637e-41	down	HIDM	EAZ04124.1 hypothetical protein OsI_26270 [Oryza sativa Indica Group]	-	-	-	-	-	GO:0016787//hydrolase activity	-
Mesophyll	SK1G00054464	At5g17165	1.8142	2.38973	23989	15404	0.332	0.399	0.397494254157678	7.84181291160895e-46	2.88798285908734e-41	up	At5g17165	XP_015636552.1 late embryogenesis abundant protein At5g17165 [Oryza sativa Japonica Group]	-	-	-	-	-	-	-
Mesophyll	SK1G00055346	SK1G00055346	1.04949	0.846004	23989	15404	0.299	0.233	-0.310925	8.25725905433122e-46	3.0409833645291e-41	down	--	XP_015642034.1 uncharacterized protein LOC4340119 [Oryza sativa Japonica Group]	-	-	-	-	-	-	-
Mesophyll	SK1G00059851	CFBP	0.334777	0.49969	23989	15404	0.124	0.176	0.577688029841445	8.92724792586487e-46	3.28772686613752e-41	up	CFBP	EEC79294.1 hypothetical protein OsI_20105 [Oryza sativa Indica Group]	Metabolism;Metabolism;Metabolism;Metabolism;Metabolism;Metabolism;Metabolism	Global and overview maps;Global and overview maps;Global and overview maps;Carbohydrate metabolism;Energy metabolism;Carbohydrate metabolism;Carbohydrate metabolism	ko01100//Metabolic pathways;ko01110//Biosynthesis of secondary metabolites;ko01200//Carbon metabolism;ko00010//Glycolysis / Gluconeogenesis;ko00710//Carbon fixation in photosynthetic organisms;ko00051//Fructose and mannose metabolism;ko00030//Pentose phosphate pathway	K03841;K03841;K03841;K03841;K03841;K03841;K03841	-	-	-
Mesophyll	SK1G00070680	SK1G00070680-PAP2	1.37996	1.03221	23989	15404	0.363	0.309	-0.418857	1.46595346085739e-45	5.39881340564558e-41	down	PAP2	RZC53871.1 hypothetical protein C5167_012728 [Papaver somniferum]	-	-	-	-	-	GO:0003993//acid phosphatase activity;GO:0005515//protein binding;GO:0016787//hydrolase activity;GO:0046872//metal ion binding	-
Mesophyll	SK1G00051661	SK1G00051661	0.214074	0.331612	23989	15404	0.098	0.145	0.631148161257046	2.11839642395506e-45	7.8016303501417e-41	up	--	XP_015623089.1 uncharacterized protein LOC4328170 [Oryza sativa Japonica Group]	-	-	-	-	-	-	-
Mesophyll	SK1G00048089	SK1G00048089	1.41857	1.72169	23989	15404	0.475	0.539	0.279371274388407	2.43647708713276e-45	8.97305781649253e-41	up	--	EAY88091.1 hypothetical protein OsI_09523 [Oryza sativa Indica Group]	-	-	-	-	-	-	-
Mesophyll	SK1G00063285	SK1G00063285-UBC2	1.28322	1.55059	23989	15404	0.449	0.518	0.273032549208159	4.0537367489177e-45	1.49291016989141e-40	up	UBC2	XP_002461515.1 ubiquitin-conjugating enzyme E2 2 [Sorghum bicolor]	Genetic Information Processing	Folding, sorting and degradation	ko04120//Ubiquitin mediated proteolysis	K10573	-	GO:0005515//protein binding	-
Mesophyll	SK1G00041025	SK1G00041025-ABCB11	2.98148	3.58952	23989	15404	0.546	0.613	0.267754651202236	6.83615574072885e-45	2.51761943619562e-40	up	ABCB11	EEC71330.1 hypothetical protein OsI_03378 [Oryza sativa Indica Group]	Environmental Information Processing	Membrane transport	ko02010//ABC transporters	K05658	GO:0005575//cellular_component;GO:0005737//cytoplasm;GO:0005887//integral component of plasma membrane;GO:0009380//excinuclease repair complex;GO:0009898//cytoplasmic side of plasma membrane;GO:0016021//integral component of membrane;GO:0043190//ATP-binding cassette (ABC) transporter complex;GO:0055051//ATP-binding cassette (ABC) transporter complex, integrated substrate binding;GO:0055052//ATP-b…	GO:0003674//molecular_function;GO:0003924//GTPase activity;GO:0004020//adenylylsulfate kinase activity;GO:0004140//dephospho-CoA kinase activity;GO:0004849//uridine kinase activity;GO:0005260//channel-conductance-controlling ATPase activity;GO:0005319//lipid transporter activity;GO:0005524//ATP binding;GO:0005525//GTP binding;GO:0008134//transcription factor binding;GO:0008565//protein transporte…	GO:0000910//cytokinesis;GO:0006289//nucleotide-excision repair;GO:0006355//regulation of transcription, DNA-templated;GO:0006790//sulfur compound metabolic process;GO:0006810//transport;GO:0006817//phosphate ion transport;GO:0006824//cobalt ion transport;GO:0006855//drug transmembrane transport;GO:0006869//lipid transport;GO:0007186//G-protein coupled receptor signaling pathway;GO:0007601//visual…
Mesophyll	SK1G00074906	RPS17	0.241125	0.333267	23989	15404	0.113	0.162	0.466735689737802	1.00222724433968e-44	3.69100249545416e-40	up	RPS17	XP_015636190.1 30S ribosomal protein S17, chloroplastic [Oryza sativa Japonica Group]	Genetic Information Processing	Translation	ko03010//Ribosome	K02961	GO:0005840//ribosome;GO:0022627//cytosolic small ribosomal subunit	GO:0003735//structural constituent of ribosome	GO:0006412//translation
Mesophyll	SK1G00055897	SK1G00055897	2.90006	2.35376	23989	15404	0.554	0.493	-0.301104	1.28293470386651e-44	4.72479192739958e-40	down	--	BAD45714.1 unknown protein [Oryza sativa Japonica Group]	-	-	-	-	-	-	-
Mesophyll	SK1G00073911	SK1G00073911-WRKY62	0.463995	0.662899	23989	15404	0.181	0.235	0.514586108579241	1.72635286617475e-44	6.35781233554836e-40	up	WRKY62	XP_015610755.1 WRKY transcription factor WRKY62 [Oryza sativa Japonica Group]	-	-	-	-	-	GO:0003700//transcription factor activity, sequence-specific DNA binding;GO:0043565//sequence-specific DNA binding	GO:0006355//regulation of transcription, DNA-templated
Mesophyll	SK1G00044869	SK1G00044869	1.2355	1.55369	23989	15404	0.306	0.374	0.330575941500928	1.89624276784651e-44	6.98348286542514e-40	up	--	EAY91536.1 hypothetical protein OsI_13169 [Oryza sativa Indica Group]	-	-	-	-	-	GO:0008967//phosphoglycolate phosphatase activity;GO:0016787//hydrolase activity;GO:0016791//phosphatase activity;GO:0016862//intramolecular oxidoreductase activity, interconverting keto- and enol-groups;GO:0018784//(S)-2-haloacid dehalogenase activity	GO:0006805//xenobiotic metabolic process;GO:0008152//metabolic process;GO:0009853//photorespiration;GO:0015671//oxygen transport;GO:0019509//L-methionine biosynthetic process from methylthioadenosine;GO:0043094//cellular metabolic compound salvage
Mesophyll	SK1G00040183	ESK1	1.93009	1.60027	23989	15404	0.545	0.479	-0.270342	2.21336210791196e-44	8.15136997101816e-40	down	ESK1	EAY76370.1 hypothetical protein OsI_04301 [Oryza sativa Indica Group]	-	-	-	-	-	-	-
Mesophyll	SK1G00039572	RPL27	1.058	1.29043	23989	15404	0.404	0.472	0.286495023270787	2.60537905927964e-44	9.59508999951506e-40	up	RPL27	EEC72062.1 hypothetical protein OsI_04988 [Oryza sativa Indica Group]	Genetic Information Processing	Translation	ko03010//Ribosome	K02899	GO:0000315//organellar large ribosomal subunit;GO:0005840//ribosome;GO:0022625//cytosolic large ribosomal subunit	GO:0003735//structural constituent of ribosome	GO:0006412//translation
Mesophyll	SK1G00050138	At1g67480	0.24389	0.357465	23989	15404	0.115	0.165	0.551387061627758	3.25610216161061e-44	1.19915730407796e-39	up	At1g67480	KAB8087383.1 hypothetical protein EE612_011569 [Oryza sativa]	-	-	-	-	-	GO:0005515//protein binding	-
Mesophyll	SK1G00055999	SK1G00055999-ALDH2B7	0.203098	0.30894	23989	15404	0.091	0.136	0.60490998747319	1.23834443721075e-43	4.56057489335976e-39	up	ALDH2B7	EAZ00462.1 hypothetical protein OsI_22484 [Oryza sativa Indica Group]	Metabolism;Metabolism;Metabolism;Metabolism;Metabolism;Metabolism;Metabolism;Metabolism;Metabolism;Metabolism;Metabolism;Metabolism;Metabolism;Metabolism	Global and overview maps;Global and overview maps;Carbohydrate metabolism;Carbohydrate metabolism;Lipid metabolism;Amino acid metabolism;Amino acid metabolism;Carbohydrate metabolism;Lipid metabolism;Amino acid metabolism;Metabolism of other amino acids;Amino acid metabolism;Amino acid metabolism;Metabolism of terpenoids and polyketides	ko01100//Metabolic pathways;ko01110//Biosynthesis of secondary metabolites;ko00010//Glycolysis / Gluconeogenesis;ko00620//Pyruvate metabolism;ko00561//Glycerolipid metabolism;ko00380//Tryptophan metabolism;ko00330//Arginine and proline metabolism;ko00053//Ascorbate and aldarate metabolism;ko00071//Fatty acid degradation;ko00280//Valine, leucine and isoleucine degradation;ko00410//beta-Alanine met…	K00128;K00128;K00128;K00128;K00128;K00128;K00128;K00128;K00128;K00128;K00128;K00128;K00128;K00128	-	GO:0003842//1-pyrroline-5-carboxylate dehydrogenase activity;GO:0004491//methylmalonate-semialdehyde dehydrogenase (acylating) activity;GO:0004777//succinate-semialdehyde dehydrogenase (NAD+) activity;GO:0008802//betaine-aldehyde dehydrogenase activity;GO:0009013//succinate-semialdehyde dehydrogenase [NAD(P)+] activity;GO:0016491//oxidoreductase activity;GO:0016620//oxidoreductase activity, actin…	GO:0006527//arginine catabolic process;GO:0006562//proline catabolic process;GO:0006574//valine catabolic process;GO:0006578//amino-acid betaine biosynthetic process;GO:0009450//gamma-aminobutyric acid catabolic process;GO:0010124//phenylacetate catabolic process;GO:0055114//oxidation-reduction process
Mesophyll	SK1G00049229	At4g16820	0.784121	0.562975	23989	15404	0.265	0.211	-0.477934	1.28247844725556e-43	4.72311162555276e-39	down	At4g16820	CAC39051.1 lipase-like protein [Oryza sativa]	-	-	-	-	-	GO:0004806//triglyceride lipase activity;GO:0016788//hydrolase activity, acting on ester bonds	GO:0006629//lipid metabolic process
Mesophyll	SK1G00058460	SK1G00058460-RPL18C	1.71302	2.06677	23989	15404	0.488	0.551	0.270818538798823	1.48589371090284e-43	5.47224935851298e-39	up	RPL18C	XP_015639202.1 60S ribosomal protein L18-3 [Oryza sativa Japonica Group]	Genetic Information Processing	Translation	ko03010//Ribosome	K02883	-	-	-
Mesophyll	SK1G00059912	PHT4;2	0.694435	0.90129	23989	15404	0.261	0.325	0.37610460386123	1.79764612650815e-43	6.62037115470423e-39	up	PHT4;2	KAB8099685.1 hypothetical protein EE612_029884 [Oryza sativa]	-	-	-	-	GO:0005887//integral component of plasma membrane;GO:0016021//integral component of membrane	GO:0008028//monocarboxylic acid transmembrane transporter activity;GO:0015169//glycerol-3-phosphate transmembrane transporter activity;GO:0015514//nitrite efflux transmembrane transporter activity;GO:0022857//transmembrane transporter activity;GO:0042910//xenobiotic transporter activity;GO:0051119//sugar transmembrane transporter activity	GO:0008643//carbohydrate transport;GO:0015707//nitrite transport;GO:0015718//monocarboxylic acid transport;GO:0015794//glycerol-3-phosphate transport;GO:0042908//xenobiotic transport;GO:0055085//transmembrane transport
Mesophyll	SK1G00044149	RPL17	1.38716	1.66516	23989	15404	0.467	0.529	0.26350830215936	1.89797876174917e-43	6.98987618376984e-39	up	RPL17	XP_015630559.1 50S ribosomal protein L17, chloroplastic [Oryza sativa Japonica Group]	Genetic Information Processing	Translation	ko03010//Ribosome	K02879	GO:0005762//mitochondrial large ribosomal subunit;GO:0005840//ribosome;GO:0022625//cytosolic large ribosomal subunit	GO:0003735//structural constituent of ribosome	GO:0006412//translation
Mesophyll	SK1G00068791	SK1G00068791-RPS16A	0.823525	1.03517	23989	15404	0.335	0.401	0.329954524877715	3.07019455958078e-43	1.13069125240241e-38	up	RPS16A	XP_015617880.1 40S ribosomal protein S16-like [Oryza sativa Japonica Group]	Genetic Information Processing	Translation	ko03010//Ribosome	K02960	GO:0005840//ribosome;GO:0022627//cytosolic small ribosomal subunit	GO:0003735//structural constituent of ribosome	GO:0006412//translation
Mesophyll	SK1G00056270	SK1G00056270-SAMT	2.68023	2.06205	23989	15404	0.423	0.358	-0.378261	3.23956640299391e-43	1.1930675148946e-38	down	SAMT	EAZ00699.1 hypothetical protein OsI_22725 [Oryza sativa Indica Group]	-	-	-	-	-	GO:0008168//methyltransferase activity;GO:0008171//O-methyltransferase activity	GO:0009102//biotin biosynthetic process
Mesophyll	SK1G00075123	SK1G00075123-rpl2-A	21.8972	27.5055	23989	15404	0.709	0.764	0.328972673461815	4.23574944509608e-43	1.55994180563998e-38	up	rpl2-A	AEZ03739.1 hypothetical protein [Oryza sativa Indica Group]	Genetic Information Processing	Translation	ko03010//Ribosome	K02886	GO:0000315//organellar large ribosomal subunit;GO:0005840//ribosome;GO:0022625//cytosolic large ribosomal subunit	GO:0003735//structural constituent of ribosome	GO:0006412//translation
Mesophyll	SK1G00065523	SK1G00065523	1.76743	1.4034	23989	15404	0.445	0.398	-0.3327	1.34356926304455e-42	4.94809688194046e-38	down	--	BAT04301.1 Os08g0205800, partial [Oryza sativa Japonica Group]	-	-	-	-	GO:0030176//integral component of endoplasmic reticulum membrane	-	GO:2001256//regulation of store-operated calcium entry
Mesophyll	SK1G00064193	At3g52300	0.937981	1.16016	23989	15404	0.369	0.434	0.306669293969647	1.42833132363885e-42	5.26025859869716e-38	up	At3g52300	XP_015650637.1 ATP synthase subunit d, mitochondrial [Oryza sativa Japonica Group]	Metabolism;Metabolism	Global and overview maps;Energy metabolism	ko01100//Metabolic pathways;ko00190//Oxidative phosphorylation	K02138;K02138	GO:0000276//mitochondrial proton-transporting ATP synthase complex, coupling factor F(o);GO:0005576//extracellular region	GO:0005488//binding;GO:0015078//hydrogen ion transmembrane transporter activity;GO:0020037//heme binding	GO:0006810//transport;GO:0015986//ATP synthesis coupled proton transport
Mesophyll	SK1G00040398	ERF4	1.57714	1.30349	23989	15404	0.512	0.466	-0.274909	1.57290084833857e-42	5.79267924426129e-38	down	ERF4	AAV98701.1 BTH-induced ERF transcriptional factor 2 [Oryza sativa Indica Group]	-	-	-	-	-	GO:0000772//mating pheromone activity;GO:0003700//transcription factor activity, sequence-specific DNA binding	GO:0006355//regulation of transcription, DNA-templated
Mesophyll	SK1G00056078	SK1G00056078-NUDT21	4.10202	3.31722	23989	15404	0.558	0.503	-0.306351	1.95782943301617e-42	7.21029423591194e-38	down	NUDT21	AWW16499.1 nudix hydrolase 17, mitochondrial-like protein [Ipomoea pes-caprae]	-	-	-	-	-	GO:0016787//hydrolase activity;GO:0016818//hydrolase activity, acting on acid anhydrides, in phosphorus-containing anhydrides;GO:0017111//nucleoside-triphosphatase activity	GO:0006139//nucleobase-containing compound metabolic process;GO:0006281//DNA repair
Mesophyll	SK1G00044294	RPL4	0.804354	1.01035	23989	15404	0.306	0.373	0.328911246997828	1.97109047623308e-42	7.2591320058712e-38	up	RPL4	XP_015632250.1 60S ribosomal protein L4 [Oryza sativa Japonica Group]	Genetic Information Processing	Translation	ko03010//Ribosome	K02930	GO:0005840//ribosome;GO:0022625//cytosolic large ribosomal subunit	GO:0003735//structural constituent of ribosome	GO:0006412//translation
Mesophyll	SK1G00061392	TIFY10B	1.30277	1.05325	23989	15404	0.439	0.378	-0.306719	2.0902356907698e-42	7.69792000196702e-38	down	TIFY10B	A2YNP2.1 RecName: Full=Protein TIFY 10b [Oryza sativa Indica Group]	Environmental Information Processing	Signal transduction	ko04075//Plant hormone signal transduction	K13464	-	GO:0005515//protein binding	-
Mesophyll	SK1G00042109	PSBO	0.817442	1.03133	23989	15404	0.295	0.359	0.335274349904449	3.5109465596754e-42	1.29301139899726e-37	up	PSBO	EEC70714.1 hypothetical protein OsI_02088 [Oryza sativa Indica Group]	Metabolism	Energy metabolism	ko00195//Photosynthesis	K02716	GO:0009654//photosystem II oxygen evolving complex	GO:0010242//oxygen evolving activity	GO:0010207//photosystem II assembly;GO:0042549//photosystem II stabilization
Mesophyll	SK1G00066803	SK1G00066803	0.456681	0.690133	23989	15404	0.121	0.171	0.595580544716979	4.354411271131e-42	1.60364258293212e-37	up	--	-	-	-	-	-	-	-	-
Mesophyll	SK1G00041679	GPC1	0.503902	0.68663	23989	15404	0.214	0.271	0.446313727241847	5.25963395261485e-42	1.937017992069e-37	up	GPC1	XP_015615982.1 uncharacterized membrane protein C776.05 isoform X1 [Oryza sativa Japonica Group]	-	-	-	-	-	-	-
Mesophyll	SK1G00041310	MMDH	0.943142	1.17044	23989	15404	0.367	0.431	0.311479312295035	9.04576675358886e-42	3.33137498001171e-37	up	MMDH	XP_015621604.1 malate dehydrogenase, mitochondrial [Oryza sativa Japonica Group]	Metabolism;Metabolism;Metabolism;Metabolism;Metabolism;Metabolism;Metabolism;Metabolism	Global and overview maps;Global and overview maps;Global and overview maps;Amino acid metabolism;Carbohydrate metabolism;Energy metabolism;Carbohydrate metabolism;Carbohydrate metabolism	ko01100//Metabolic pathways;ko01110//Biosynthesis of secondary metabolites;ko01200//Carbon metabolism;ko00270//Cysteine and methionine metabolism;ko00620//Pyruvate metabolism;ko00710//Carbon fixation in photosynthetic organisms;ko00630//Glyoxylate and dicarboxylate metabolism;ko00020//Citrate cycle (TCA cycle)	K00026;K00026;K00026;K00026;K00026;K00026;K00026;K00026	GO:0005737//cytoplasm	GO:0003854//3-beta-hydroxy-delta5-steroid dehydrogenase activity;GO:0004459//L-lactate dehydrogenase activity;GO:0004553//hydrolase activity, hydrolyzing O-glycosyl compounds;GO:0016491//oxidoreductase activity;GO:0016616//oxidoreductase activity, acting on the CH-OH group of donors, NAD or NADP as acceptor;GO:0030060//L-malate dehydrogenase activity	GO:0005975//carbohydrate metabolic process;GO:0006099//tricarboxylic acid cycle;GO:0006694//steroid biosynthetic process;GO:0055114//oxidation-reduction process
Mesophyll	SK1G00063071	QCR7-1	0.432463	0.573636	23989	15404	0.19	0.248	0.407476929976979	9.26439146819382e-42	3.41189008990642e-37	up	QCR7-1	KAF2921872.1 hypothetical protein DAI22_07g067400 [Oryza sativa Japonica Group]	Metabolism;Metabolism	Global and overview maps;Energy metabolism	ko01100//Metabolic pathways;ko00190//Oxidative phosphorylation	K00417;K00417	GO:0005750//mitochondrial respiratory chain complex III	-	GO:0006122//mitochondrial electron transport, ubiquinol to cytochrome c
Mesophyll	SK1G00046709	ADT2	0.57007	0.734771	23989	15404	0.243	0.306	0.366099295696155	9.53970906861182e-42	3.51328405578836e-37	up	ADT2	EEC75007.1 hypothetical protein OsI_11076 [Oryza sativa Indica Group]	Metabolism;Metabolism;Metabolism;Metabolism	Global and overview maps;Global and overview maps;Global and overview maps;Amino acid metabolism	ko01100//Metabolic pathways;ko01110//Biosynthesis of secondary metabolites;ko01230//Biosynthesis of amino acids;ko00400//Phenylalanine, tyrosine and tryptophan biosynthesis	K05359;K05359;K05359;K05359	-	GO:0004505//phenylalanine 4-monooxygenase activity;GO:0004510//tryptophan 5-monooxygenase activity;GO:0004664//prephenate dehydratase activity	GO:0006559//L-phenylalanine catabolic process;GO:0006568//tryptophan metabolic process;GO:0009094//L-phenylalanine biosynthetic process
Mesophyll	SK1G00068872	SK1G00068872-RPL26A	1.14828	1.40649	23989	15404	0.418	0.48	0.292603124649768	1.88106864376508e-41	6.92759960125802e-37	up	RPL26A	XP_015618223.1 60S ribosomal protein L26-1 [Oryza sativa Japonica Group]	Genetic Information Processing	Translation	ko03010//Ribosome	K02898	GO:0000315//organellar large ribosomal subunit;GO:0015934//large ribosomal subunit;GO:0022625//cytosolic large ribosomal subunit	GO:0003735//structural constituent of ribosome	GO:0006412//translation
Mesophyll	SK1G00053688	SK1G00053688-RPL6C	0.624549	0.800544	23989	15404	0.248	0.311	0.35811485460431	2.48663182524553e-41	9.15776768601424e-37	up	RPL6C	CAH67436.1 H0305E08.7 [Oryza sativa]	Genetic Information Processing	Translation	ko03010//Ribosome	K02934	GO:0005840//ribosome	GO:0003735//structural constituent of ribosome;GO:0008780//acyl-[acyl-carrier-protein]-UDP-N-acetylglucosamine O-acyltransferase activity	GO:0006412//translation;GO:0009245//lipid A biosynthetic process
Mesophyll	SK1G00069870	SK1G00069870-RBG3	0.568162	0.73668	23989	15404	0.231	0.292	0.37467710017121	6.47046901847112e-41	2.38294433012254e-36	up	RBG3	EAY83219.1 hypothetical protein OsI_38428 [Oryza sativa Indica Group]	Genetic Information Processing	Transcription	ko03040//Spliceosome	K12741	-	GO:0003676//nucleic acid binding	GO:0008380//RNA splicing
Mesophyll	SK1G00044276	RPS18A	0.485952	0.640796	23989	15404	0.219	0.278	0.398978396226196	1.19039328657679e-40	4.383980395805e-36	up	RPS18A	XP_015630007.1 40S ribosomal protein S18 [Oryza sativa Japonica Group]	Genetic Information Processing	Translation	ko03010//Ribosome	K02964	GO:0005840//ribosome;GO:0022627//cytosolic small ribosomal subunit	GO:0003723//RNA binding;GO:0003735//structural constituent of ribosome	GO:0006412//translation
Mesophyll	SK1G00041635	ALDH2C4	2.16454	1.69981	23989	15404	0.411	0.366	-0.348662	2.0435885310363e-40	7.5261278421005e-36	down	ALDH2C4	KAB8082074.1 hypothetical protein EE612_003819 [Oryza sativa]	Metabolism	Biosynthesis of other secondary metabolites	ko00940//Phenylpropanoid biosynthesis	K12355	-	GO:0003842//1-pyrroline-5-carboxylate dehydrogenase activity;GO:0004350//glutamate-5-semialdehyde dehydrogenase activity;GO:0004491//methylmalonate-semialdehyde dehydrogenase (acylating) activity;GO:0004777//succinate-semialdehyde dehydrogenase (NAD+) activity;GO:0008802//betaine-aldehyde dehydrogenase activity;GO:0009013//succinate-semialdehyde dehydrogenase [NAD(P)+] activity;GO:0016491//oxidor…	GO:0006527//arginine catabolic process;GO:0006561//proline biosynthetic process;GO:0006562//proline catabolic process;GO:0006574//valine catabolic process;GO:0006578//amino-acid betaine biosynthetic process;GO:0009450//gamma-aminobutyric acid catabolic process;GO:0010124//phenylacetate catabolic process;GO:0055114//oxidation-reduction process
Mesophyll	SK1G00046841	Os03g0268000	0.646513	0.840013	23989	15404	0.268	0.327	0.377679752414608	2.11797210219758e-40	7.80006765797325e-36	up	Os03g0268000	P48489.2 RecName: Full=Serine/threonine-protein phosphatase PP1 [Oryza sativa Japonica Group]	Genetic Information Processing	Translation	ko03015//mRNA surveillance pathway	K06269	-	GO:0004113//2',3'-cyclic-nucleotide 3'-phosphodiesterase activity;GO:0008803//bis(5'-nucleosyl)-tetraphosphatase (symmetrical) activity;GO:0016787//hydrolase activity;GO:0051731//polynucleotide 5'-hydroxyl-kinase activity	GO:0006139//nucleobase-containing compound metabolic process;GO:0042245//RNA repair
Mesophyll	SK1G00072719	At5g38386	0.96841	1.21704	23989	15404	0.206	0.265	0.329656357394854	2.51765575717143e-40	9.27202262251093e-36	up	At5g38386	XP_015613506.1 uncharacterized protein LOC4348029 [Oryza sativa Japonica Group]	-	-	-	-	-	GO:0005515//protein binding	GO:0006355//regulation of transcription, DNA-templated;GO:0019058//viral life cycle
Mesophyll	SK1G00041126	Os01g0679700	1.00262	1.23273	23989	15404	0.383	0.446	0.298052875912435	2.77505326875585e-40	1.02199661781741e-35	up	Os01g0679700	NP_001147066.1 60S ribosomal protein L37a isoform 2 [Zea mays]	Genetic Information Processing	Translation	ko03010//Ribosome	K02921	GO:0000315//organellar large ribosomal subunit;GO:0005840//ribosome;GO:0022625//cytosolic large ribosomal subunit	GO:0003735//structural constituent of ribosome;GO:0008270//zinc ion binding;GO:0051539//4 iron, 4 sulfur cluster binding;GO:0070283//radical SAM enzyme activity	GO:0006412//translation;GO:0015948//methanogenesis;GO:0035556//intracellular signal transduction;GO:0046500//S-adenosylmethionine metabolic process
Mesophyll	SK1G00046340	RPL18C	0.485821	0.63393	23989	15404	0.208	0.266	0.383829621241889	4.88746667238382e-40	1.79995622610551e-35	up	RPL18C	XP_015631625.1 60S ribosomal protein L18-3 [Oryza sativa Japonica Group]	Genetic Information Processing	Translation	ko03010//Ribosome	K02883	-	-	-
Mesophyll	SK1G00040287	SK1G00040287-MOR1	0.163881	0.242966	23989	15404	0.079	0.12	0.567818958241748	6.08397619285517e-40	2.2406067523047e-35	up	MOR1	KAB8084022.1 hypothetical protein EE612_006462 [Oryza sativa]	-	-	-	-	GO:0000221//vacuolar proton-transporting V-type ATPase, V1 domain	GO:0004674//protein serine/threonine kinase activity;GO:0005515//protein binding	GO:1902600//hydrogen ion transmembrane transport
Mesophyll	SK1G00070141	SK1G00070141	5.03219	6.09183	23989	15404	0.544	0.602	0.275682230790841	4.41840439382519e-39	1.62720997015794e-34	up	--	XP_015618805.1 major pollen allergen Bet v 1-G [Oryza sativa Japonica Group]	-	-	-	-	-	-	GO:0006952//defense response
Mesophyll	SK1G00050257	RPS27	1.28797	1.58032	23989	15404	0.402	0.465	0.295094077274617	5.09639746926474e-39	1.87690125998082e-34	up	RPS27	EAY85847.1 hypothetical protein OsI_07209 [Oryza sativa Indica Group]	Genetic Information Processing	Translation	ko03010//Ribosome	K02978	GO:0005840//ribosome	GO:0003735//structural constituent of ribosome	GO:0006412//translation
Mesophyll	SK1G00055227	SK1G00055227-CYP704C1	0.424676	0.274147	23989	15404	0.145	0.103	-0.631223	5.52943984506263e-39	2.03638210613966e-34	down	CYP704C1	XP_015643987.1 cytochrome P450 704C1 [Oryza sativa Japonica Group]	-	-	-	-	-	GO:0003677//DNA binding;GO:0005506//iron ion binding;GO:0016705//oxidoreductase activity, acting on paired donors, with incorporation or reduction of molecular oxygen;GO:0020037//heme binding	GO:0006260//DNA replication;GO:0055114//oxidation-reduction process
Mesophyll	SK1G00053946	SK1G00053946	2.62157	3.15012	23989	15404	0.506	0.567	0.264964693771187	8.57651554841515e-39	3.15855914617033e-34	up	--	XP_015635678.1 uncharacterized protein LOC4336372 [Oryza sativa Japonica Group]	-	-	-	-	-	-	-
Mesophyll	SK1G00051018	At1g09760	0.154438	0.241218	23989	15404	0.077	0.116	0.642978408362585	1.30390766057632e-38	4.80203113237045e-34	up	At1g09760	XP_015627328.1 U2 small nuclear ribonucleoprotein A' [Oryza sativa Japonica Group]	Genetic Information Processing	Transcription	ko03040//Spliceosome	K11092	-	GO:0004525//ribonuclease III activity;GO:0005515//protein binding	GO:0006396//RNA processing
Mesophyll	SK1G00055096	KAO	0.143697	0.24379	23989	15404	0.07	0.105	0.762201493793722	1.33814607180999e-38	4.92812435326183e-34	up	KAO	EEE64964.1 hypothetical protein OsJ_19857 [Oryza sativa Japonica Group]	Metabolism;Metabolism;Metabolism	Global and overview maps;Global and overview maps;Metabolism of terpenoids and polyketides	ko01100//Metabolic pathways;ko01110//Biosynthesis of secondary metabolites;ko00904//Diterpenoid biosynthesis	K04123;K04123;K04123	-	GO:0005506//iron ion binding;GO:0016705//oxidoreductase activity, acting on paired donors, with incorporation or reduction of molecular oxygen;GO:0020037//heme binding	GO:0055114//oxidation-reduction process
Mesophyll	SK1G00064465	SK1G00064465-CAF1-7	1.26681	1.53426	23989	15404	0.455	0.507	0.27632207211441	1.6979874813942e-38	6.25334829647855e-34	up	CAF1-7	XP_015651075.1 probable CCR4-associated factor 1 homolog 7 [Oryza sativa Japonica Group]	Genetic Information Processing	Folding, sorting and degradation	ko03018//RNA degradation	K12581	-	-	-
Mesophyll	SK1G00040246	WRKY54	0.731957	0.561985	23989	15404	0.294	0.239	-0.381167	2.65201903554136e-38	9.76685570409171e-34	down	WRKY54	EAY76303.1 hypothetical protein OsI_04237 [Oryza sativa Indica Group]	-	-	-	-	-	GO:0003700//transcription factor activity, sequence-specific DNA binding;GO:0043565//sequence-specific DNA binding	GO:0006355//regulation of transcription, DNA-templated
Mesophyll	SK1G00057891	SK1G00057891-At5g55050	0.64244	0.479958	23989	15404	0.261	0.21	-0.420578	2.7855530839515e-38	1.02586348975766e-33	down	At5g55050	XP_015644095.1 GDSL esterase/lipase At5g55050 [Oryza sativa Japonica Group]	-	-	-	-	-	GO:0016788//hydrolase activity, acting on ester bonds	-
Mesophyll	SK1G00045053	Os03g0693900	0.562278	0.838946	23989	15404	0.071	0.109	0.577208599102576	3.01926617423685e-38	1.11193534664795e-33	up	Os03g0693900	XP_015629893.1 germin-like protein 3-5 [Oryza sativa Japonica Group]	-	-	-	-	-	-	GO:0006355//regulation of transcription, DNA-templated
Mesophyll	SK1G00061401	SK1G00061401-GSVIVT00034021001	1.06645	1.30737	23989	15404	0.385	0.445	0.293831881267234	3.19488531472353e-38	1.17661236370638e-33	up	GSVIVT00034021001	EAZ04711.1 hypothetical protein OsI_26872 [Oryza sativa Indica Group]	Genetic Information Processing	Translation	ko03010//Ribosome	K02998	GO:0000314//organellar small ribosomal subunit;GO:0005840//ribosome;GO:0016021//integral component of membrane;GO:0022627//cytosolic small ribosomal subunit	GO:0003735//structural constituent of ribosome	GO:0006412//translation
Mesophyll	SK1G00063451	SK1G00063451	2.61829	2.1232	23989	15404	0.512	0.464	-0.302375	3.50549223434351e-38	1.29100268006403e-33	down	--	TVU40548.1 hypothetical protein EJB05_14015, partial [Eragrostis curvula]	-	-	-	-	-	GO:0000287//magnesium ion binding;GO:0003674//molecular_function;GO:0003677//DNA binding;GO:0005516//calmodulin binding;GO:0009020//tRNA (guanosine-2'-O-)-methyltransferase activity;GO:0009036//Type II site-specific deoxyribonuclease activity;GO:0030507//spectrin binding	GO:0009307//DNA restriction-modification system;GO:0031175//neuron projection development;GO:0043571//maintenance of CRISPR repeat elements
Mesophyll	SK1G00043633	alaXL	0.654858	0.91409	23989	15404	0.2	0.249	0.481093147690484	3.91661461297515e-38	1.44241082966649e-33	up	alaXL	XP_015621238.1 uncharacterized protein LOC4326034 [Oryza sativa Japonica Group]	-	-	-	-	GO:0005737//cytoplasm	GO:0000166//nucleotide binding;GO:0004812//aminoacyl-tRNA ligase activity;GO:0004813//alanine-tRNA ligase activity;GO:0005524//ATP binding	GO:0006419//alanyl-tRNA aminoacylation;GO:0043039//tRNA aminoacylation
Mesophyll	SK1G00070142	SK1G00070142	23.2483	28.7771	23989	15404	0.669	0.676	0.307797481695253	3.99115651203262e-38	1.46986312025137e-33	up	--	XP_015618351.1 major pollen allergen Bet v 1-D/H [Oryza sativa Japonica Group]	-	-	-	-	-	-	GO:0006952//defense response
Mesophyll	SK1G00054647	BXL4	0.912296	1.17819	23989	15404	0.296	0.354	0.368957760688752	7.62156031155142e-38	2.80686823153816e-33	up	BXL4	CAE03635.1 OSJNBb0003B01.27 [Oryza sativa Japonica Group]	Metabolism;Metabolism	Global and overview maps;Carbohydrate metabolism	ko01100//Metabolic pathways;ko00520//Amino sugar and nucleotide sugar metabolism	K15920;K15920	-	GO:0004553//hydrolase activity, hydrolyzing O-glycosyl compounds	GO:0005975//carbohydrate metabolic process
Mesophyll	SK1G00047906	SK1G00047906-MLO1	0.484417	0.642393	23989	15404	0.185	0.24	0.407130849283029	8.74446560513647e-38	3.22041179305966e-33	up	MLO1	AAK94907.1 seven transmembrane protein MLO2 [Oryza sativa Indica Group]	-	-	-	-	GO:0016021//integral component of membrane	-	GO:0006952//defense response
Mesophyll	SK1G00052306	ABCG28	0.479433	0.631899	23989	15404	0.209	0.265	0.398290289210907	1.26151937695679e-37	4.64592356145648e-33	up	ABCG28	XP_015633462.1 ABC transporter G family member 25-like [Oryza sativa Japonica Group]	-	-	-	-	GO:0005575//cellular_component;GO:0005887//integral component of plasma membrane;GO:0009380//excinuclease repair complex;GO:0009898//cytoplasmic side of plasma membrane;GO:0016021//integral component of membrane;GO:0043190//ATP-binding cassette (ABC) transporter complex;GO:0055051//ATP-binding cassette (ABC) transporter complex, integrated substrate binding;GO:0055052//ATP-binding cassette (ABC) …	GO:0003674//molecular_function;GO:0003924//GTPase activity;GO:0005260//channel-conductance-controlling ATPase activity;GO:0005319//lipid transporter activity;GO:0005524//ATP binding;GO:0005525//GTP binding;GO:0008565//protein transporter activity;GO:0009381//excinuclease ABC activity;GO:0015220//choline transmembrane transporter activity;GO:0015221//lipopolysaccharide transmembrane transporter ac…	GO:0000910//cytokinesis;GO:0002949//tRNA threonylcarbamoyladenosine modification;GO:0006289//nucleotide-excision repair;GO:0006412//translation;GO:0006810//transport;GO:0006817//phosphate ion transport;GO:0006824//cobalt ion transport;GO:0006855//drug transmembrane transport;GO:0006869//lipid transport;GO:0007601//visual perception;GO:0008150//biological_process;GO:0008272//sulfate transport;GO:0…
Mesophyll	SK1G00060299	SK1G00060299-TRAF1A	0.344849	0.451628	23989	15404	0.16	0.212	0.389069837595557	1.59360271709111e-37	5.86892008650316e-33	up	TRAF1A	XP_015639513.1 TNF receptor-associated factor homolog 1a [Oryza sativa Japonica Group]	-	-	-	-	-	GO:0005515//protein binding	-
Mesophyll	SK1G00073125	SK1G00073125-SKP5	0.392373	0.537523	23989	15404	0.166	0.218	0.453999766437317	1.67250423540545e-37	6.15949859815118e-33	up	SKP5	EAZ08390.1 hypothetical protein OsI_30650 [Oryza sativa Indica Group]	Genetic Information Processing;Genetic Information Processing	Folding, sorting and degradation;Folding, sorting and degradation	ko04141//Protein processing in endoplasmic reticulum;ko04120//Ubiquitin mediated proteolysis	K03094;K03094	-	-	GO:0006511//ubiquitin-dependent protein catabolic process
Mesophyll	SK1G00050819	SBT3.3	0.379689	0.259495	23989	15404	0.146	0.102	-0.548935	2.51307821790829e-37	9.25516446091264e-33	down	SBT3.3	EEC72887.1 hypothetical protein OsI_06697 [Oryza sativa Indica Group]	-	-	-	-	-	GO:0008236//serine-type peptidase activity	GO:0006508//proteolysis;GO:0009306//protein secretion
Mesophyll	SK1G00049222	ERF1A	0.237621	0.147718	23989	15404	0.113	0.076	-0.685449	3.31105827183117e-37	1.21939654034998e-32	down	ERF1A	EAY86936.1 hypothetical protein OsI_08320 [Oryza sativa Indica Group]	-	-	-	-	-	GO:0003700//transcription factor activity, sequence-specific DNA binding	GO:0006355//regulation of transcription, DNA-templated
Mesophyll	SK1G00057990	SK1G00057990-HSR201	1.07757	0.750227	23989	15404	0.236	0.186	-0.522321	3.65195665275366e-37	1.34494259607612e-32	down	HSR201	EAZ02323.1 hypothetical protein OsI_24425 [Oryza sativa Indica Group]	-	-	-	-	-	GO:0016747//transferase activity, transferring acyl groups other than amino-acyl groups	-
Mesophyll	SK1G00067640	SK1G00067640	3.77718	4.54932	23989	15404	0.583	0.608	0.268335529186974	3.66353285433497e-37	1.34920587959448e-32	up	--	QCE13755.1 small subunit ribosomal protein S12 [Vigna unguiculata]	-	-	-	-	-	-	-
Mesophyll	SK1G00065924	FRK2	0.607752	0.746223	23989	15404	0.241	0.3	0.296079701906922	4.47776616093345e-37	1.64907172174857e-32	up	FRK2	EAZ05375.1 hypothetical protein OsI_27579 [Oryza sativa Indica Group]	Metabolism;Metabolism;Metabolism;Metabolism;Metabolism	Global and overview maps;Global and overview maps;Carbohydrate metabolism;Carbohydrate metabolism;Carbohydrate metabolism	ko01100//Metabolic pathways;ko01110//Biosynthesis of secondary metabolites;ko00500//Starch and sucrose metabolism;ko00520//Amino sugar and nucleotide sugar metabolism;ko00051//Fructose and mannose metabolism	K00847;K00847;K00847;K00847;K00847	-	GO:0004747//ribokinase activity;GO:0008662//1-phosphofructokinase activity;GO:0016773//phosphotransferase activity, alcohol group as acceptor;GO:0047590//5-dehydro-2-deoxygluconokinase activity	GO:0009244//lipopolysaccharide core region biosynthetic process;GO:0019303//D-ribose catabolic process;GO:0019310//inositol catabolic process
Mesophyll	SK1G00060154	SPT6	0.464028	0.615444	23989	15404	0.189	0.243	0.407339809284526	5.93498292404886e-37	2.18573551126871e-32	up	SPT6	EAY98543.1 hypothetical protein OsI_20456 [Oryza sativa Indica Group]	-	-	-	-	-	GO:0003677//DNA binding	-
Mesophyll	SK1G00051733	HCF173	1.01468	1.26144	23989	15404	0.361	0.418	0.31402330136436	6.27408500369286e-37	2.31062002516001e-32	up	HCF173	XP_015623533.1 uncharacterized protein LOC4328240 [Oryza sativa Japonica Group]	-	-	-	-	-	GO:0003824//catalytic activity;GO:0003854//3-beta-hydroxy-delta5-steroid dehydrogenase activity;GO:0004488//methylenetetrahydrofolate dehydrogenase (NADP+) activity;GO:0008667//2,3-dihydro-2,3-dihydroxybenzoate dehydrogenase activity;GO:0016616//oxidoreductase activity, acting on the CH-OH group of donors, NAD or NADP as acceptor;GO:0016655//oxidoreductase activity, acting on NAD(P)H, quinone or …	GO:0005975//carbohydrate metabolic process;GO:0006694//steroid biosynthetic process;GO:0006813//potassium ion transport;GO:0008152//metabolic process;GO:0055114//oxidation-reduction process
Mesophyll	SK1G00047204	SK1G00047204-RPL15	0.740156	0.912103	23989	15404	0.312	0.373	0.301330153545771	8.18949576336917e-37	3.0160274997336e-32	up	RPL15	XP_015631945.1 50S ribosomal protein L15, chloroplastic [Oryza sativa Japonica Group]	Genetic Information Processing	Translation	ko03010//Ribosome	K02876	GO:0000315//organellar large ribosomal subunit;GO:0022625//cytosolic large ribosomal subunit	GO:0003735//structural constituent of ribosome	GO:0006412//translation
Mesophyll	SK1G00041295	Os05g0573700	0.334442	0.473456	23989	15404	0.149	0.195	0.501347586542132	2.87257570539551e-36	1.05791218078306e-31	up	Os05g0573700	XP_015618511.1 ketol-acid reductoisomerase, chloroplastic-like [Oryza sativa Japonica Group]	Metabolism;Metabolism;Metabolism;Metabolism;Metabolism;Metabolism	Global and overview maps;Global and overview maps;Global and overview maps;Global and overview maps;Metabolism of cofactors and vitamins;Amino acid metabolism	ko01100//Metabolic pathways;ko01110//Biosynthesis of secondary metabolites;ko01230//Biosynthesis of amino acids;ko01210//2-Oxocarboxylic acid metabolism;ko00770//Pantothenate and CoA biosynthesis;ko00290//Valine, leucine and isoleucine biosynthesis	K00053;K00053;K00053;K00053;K00053;K00053	-	GO:0004455//ketol-acid reductoisomerase activity	GO:0009082//branched-chain amino acid biosynthetic process;GO:0009097//isoleucine biosynthetic process;GO:0009099//valine biosynthetic process;GO:0055114//oxidation-reduction process
Mesophyll	SK1G00058179	SK1G00058179-CRK2	0.668496	0.506564	23989	15404	0.255	0.202	-0.400105	2.99572106953806e-36	1.10326415548948e-31	down	CRK2	EEC78453.1 hypothetical protein OsI_18315 [Oryza sativa Indica Group]	-	-	-	-	-	GO:0004672//protein kinase activity;GO:0005524//ATP binding	GO:0006468//protein phosphorylation
Mesophyll	SK1G00060564	RPL35AB	0.721201	0.90503	23989	15404	0.28	0.339	0.327525047165865	4.23114818350334e-36	1.55824725302061e-31	up	RPL35AB	BAS95263.1 Os05g0555800, partial [Oryza sativa Japonica Group]	Genetic Information Processing	Translation	ko03010//Ribosome	K02917	GO:0005840//ribosome	GO:0003723//RNA binding;GO:0003735//structural constituent of ribosome	GO:0006364//rRNA processing;GO:0006412//translation
Mesophyll	SK1G00068272	SK1G00068272-At2g36090	0.780244	0.619719	23989	15404	0.292	0.235	-0.332264	1.66144781155163e-35	6.11878000038235e-31	down	At2g36090	BAT12748.1 Os11g0155100, partial [Oryza sativa Japonica Group]	-	-	-	-	-	GO:0005515//protein binding	-
Mesophyll	SK1G00041656	HIR1	0.141913	0.211012	23989	15404	0.067	0.103	0.571983986038185	1.99856992287887e-35	7.36033331197829e-31	up	HIR1	XP_015611928.1 hypersensitive-induced response protein 1-like [Oryza sativa Japonica Group]	-	-	-	-	GO:0005840//ribosome;GO:0030288//outer membrane-bounded periplasmic space	GO:0003674//molecular_function;GO:0003735//structural constituent of ribosome	GO:0006412//translation;GO:0045861//negative regulation of proteolysis
Mesophyll	SK1G00049918	SK1G00049918	0.371748	0.298161	23989	15404	0.165	0.122	-0.318138	2.27211621113531e-35	8.36774958236911e-31	down	--	EAY86196.1 hypothetical protein OsI_07572 [Oryza sativa Indica Group]	-	-	-	-	-	-	-
Mesophyll	SK1G00068218	LACS6	1.07829	0.894749	23989	15404	0.406	0.345	-0.269163	2.54111098081148e-35	9.35840352013253e-31	down	LACS6	EEC67669.1 hypothetical protein OsI_35096 [Oryza sativa Indica Group]	Metabolism;Cellular Processes;Metabolism;Metabolism;Metabolism	Global and overview maps;Transport and catabolism;Global and overview maps;Lipid metabolism;Lipid metabolism	ko01100//Metabolic pathways;ko04146//Peroxisome;ko01212//Fatty acid metabolism;ko00071//Fatty acid degradation;ko00061//Fatty acid biosynthesis	K01897;K01897;K01897;K01897;K01897	-	GO:0003987//acetate-CoA ligase activity;GO:0008668//(2,3-dihydroxybenzoyl)adenylate synthase activity;GO:0008756//o-succinylbenzoate-CoA ligase activity;GO:0047473//D-alanine-poly(phosphoribitol) ligase activity	GO:0009234//menaquinone biosynthetic process;GO:0019290//siderophore biosynthetic process;GO:0019350//teichoic acid biosynthetic process;GO:0019427//acetyl-CoA biosynthetic process from acetate
Mesophyll	SK1G00040259	SK1G00040259-UBC11	0.587632	0.736703	23989	15404	0.261	0.32	0.326119845975219	3.58400651525854e-35	1.31991791943942e-30	up	UBC11	KAF2953031.1 hypothetical protein DAI22_01g379700 [Oryza sativa Japonica Group]	Genetic Information Processing;Genetic Information Processing	Folding, sorting and degradation;Folding, sorting and degradation	ko04141//Protein processing in endoplasmic reticulum;ko04120//Ubiquitin mediated proteolysis	K06689;K06689	-	GO:0005515//protein binding	GO:0006464//cellular protein modification process;GO:0015031//protein transport
Mesophyll	SK1G00040267	WOX8	0.209145	0.286193	23989	15404	0.087	0.125	0.452304325192829	7.71454430236779e-35	2.84111237567601e-30	up	WOX8	XP_015626455.1 WUSCHEL-related homeobox 8 [Oryza sativa Japonica Group]	-	-	-	-	GO:0005634//nucleus	GO:0003677//DNA binding;GO:0005524//ATP binding	GO:0006355//regulation of transcription, DNA-templated
Mesophyll	SK1G00057154	FATB1	0.815107	0.652914	23989	15404	0.333	0.277	-0.320054	1.04222783341191e-34	3.83831666488939e-30	down	FATB1	EAZ01545.1 hypothetical protein OsI_23580 [Oryza sativa Indica Group]	Metabolism;Metabolism;Metabolism	Global and overview maps;Global and overview maps;Lipid metabolism	ko01100//Metabolic pathways;ko01212//Fatty acid metabolism;ko00061//Fatty acid biosynthesis	K10781;K10781;K10781	-	GO:0016790//thiolester hydrolase activity	GO:0006633//fatty acid biosynthetic process
Mesophyll	SK1G00061094	SK1G00061094-TRAPPC3	0.502887	0.645364	23989	15404	0.219	0.274	0.359814558545514	1.33171514943402e-34	4.90444055233562e-30	up	TRAPPC3	XP_015627813.1 trafficking protein particle complex subunit 3 [Oryza sativa Japonica Group]	-	-	-	-	GO:0016020//membrane	GO:0000156//phosphorelay response regulator activity;GO:0004673//protein histidine kinase activity;GO:0005524//ATP binding	GO:0000160//phosphorelay signal transduction system
Mesophyll	SK1G00053655	SK1G00053655-RGA5	0.960073	0.628557	23989	15404	0.174	0.131	-0.611021	2.16221773797493e-34	7.96301548541408e-30	down	RGA5	XP_015634576.1 heavy metal-associated isoprenylated plant protein 47 [Oryza sativa Japonica Group]	-	-	-	-	GO:0016021//integral component of membrane	GO:0061630//ubiquitin protein ligase activity	GO:0016567//protein ubiquitination
Mesophyll	SK1G00043046	HPPR	0.307954	0.210655	23989	15404	0.148	0.108	-0.547612	3.88457721806421e-34	1.43061209786869e-29	down	HPPR	EEC70231.1 hypothetical protein OsI_01001 [Oryza sativa Indica Group]	-	-	-	-	-	GO:0003824//catalytic activity;GO:0004616//phosphogluconate dehydrogenase (decarboxylating) activity;GO:0004617//phosphoglycerate dehydrogenase activity;GO:0016616//oxidoreductase activity, acting on the CH-OH group of donors, NAD or NADP as acceptor;GO:0016787//hydrolase activity;GO:0050661//NADP binding;GO:0051287//NAD binding	GO:0006098//pentose-phosphate shunt;GO:0006564//L-serine biosynthetic process;GO:0006813//potassium ion transport;GO:0030436//asexual sporulation;GO:0046168//glycerol-3-phosphate catabolic process;GO:0055114//oxidation-reduction process
Mesophyll	SK1G00048661	2MMP	1.73789	1.41108	23989	15404	0.46	0.41	-0.300514	4.33675935311814e-34	1.59714173456635e-29	down	2MMP	EAY87473.1 hypothetical protein OsI_08881 [Oryza sativa Indica Group]	-	-	-	-	GO:0031012//extracellular matrix	GO:0004222//metalloendopeptidase activity;GO:0008233//peptidase activity;GO:0008237//metallopeptidase activity;GO:0008270//zinc ion binding	GO:0006508//proteolysis
Mesophyll	SK1G00054498	SK1G00054498	1.44497	1.75644	23989	15404	0.395	0.454	0.281594712346733	4.37040385772291e-34	1.60953233272219e-29	up	--	XP_015637131.1 uncharacterized protein LOC4336825 [Oryza sativa Japonica Group]	-	-	-	-	-	-	-
Mesophyll	SK1G00060127	SK1G00060127	0.624374	0.783907	23989	15404	0.254	0.311	0.328224415201613	4.61346607427155e-34	1.69904728583273e-29	up	--	XP_015640248.1 B2 protein [Oryza sativa Japonica Group]	-	-	-	-	-	-	-
Mesophyll	SK1G00055728	SK1G00055728-RIPK	1.04543	0.837609	23989	15404	0.368	0.319	-0.319708	5.51860162909361e-34	2.03239060796259e-29	down	RIPK	KAF0902562.1 hypothetical protein E2562_018058 [Oryza meyeriana var. granulata] [Oryza meyeriana]	-	-	-	-	-	GO:0004672//protein kinase activity;GO:0005524//ATP binding	GO:0006468//protein phosphorylation
Mesophyll	SK1G00074109	PDIL2-3	0.418372	0.275449	23989	15404	0.138	0.098	-0.602822	7.70289941286188e-34	2.83682379576877e-29	down	PDIL2-3	XP_015611801.1 protein disulfide isomerase-like 2-3 [Oryza sativa Japonica Group]	Genetic Information Processing	Folding, sorting and degradation	ko04141//Protein processing in endoplasmic reticulum	K09584	GO:0005737//cytoplasm;GO:0046540//U4/U6 x U5 tri-snRNP complex	GO:0003756//protein disulfide isomerase activity;GO:0015035//protein disulfide oxidoreductase activity;GO:0015036//disulfide oxidoreductase activity;GO:0016209//antioxidant activity;GO:0016491//oxidoreductase activity;GO:0016667//oxidoreductase activity, acting on a sulfur group of donors	GO:0000398//mRNA splicing, via spliceosome;GO:0006457//protein folding;GO:0006790//sulfur compound metabolic process;GO:0055114//oxidation-reduction process
Mesophyll	SK1G00070227	TIM9	0.151602	0.222755	23989	15404	0.075	0.112	0.554867189626082	7.90009624146307e-34	2.90944744380602e-29	up	TIM9	XP_015620238.1 mitochondrial import inner membrane translocase subunit Tim9 [Oryza sativa Japonica Group]	-	-	-	-	-	-	-
Mesophyll	SK1G00044558	SK1G00044558	0.918095	1.12473	23989	15404	0.347	0.405	0.292838809532145	8.2031321674142e-34	3.0210495146153e-29	up	--	XP_015632120.1 uncharacterized protein LOC4334142 [Oryza sativa Japonica Group]	-	-	-	-	-	-	-
Mesophyll	SK1G00074342	SK1G00074342-HSP70-9	0.269853	0.39863	23989	15404	0.109	0.15	0.56270362558567	1.09874843390967e-33	4.04647073240255e-29	up	HSP70-9	XP_015611783.1 heat shock 70 kDa protein, mitochondrial [Oryza sativa Japonica Group]	Genetic Information Processing	Folding, sorting and degradation	ko03018//RNA degradation	K04043	-	GO:0005515//protein binding;GO:0005524//ATP binding;GO:0008741//ribulokinase activity;GO:0016773//phosphotransferase activity, alcohol group as acceptor;GO:0016887//ATPase activity;GO:0051082//unfolded protein binding	GO:0005975//carbohydrate metabolic process;GO:0006457//protein folding;GO:0006950//response to stress;GO:0008360//regulation of cell shape;GO:0019568//arabinose catabolic process;GO:0043093//FtsZ-dependent cytokinesis
Mesophyll	SK1G00048677	GLU10	1.52945	1.25571	23989	15404	0.448	0.398	-0.28449	1.17695642959449e-33	4.33449513891057e-29	down	GLU10	XP_015622868.1 endoglucanase 7 [Oryza sativa Japonica Group]	-	-	-	-	-	GO:0004553//hydrolase activity, hydrolyzing O-glycosyl compounds	GO:0005975//carbohydrate metabolic process
Mesophyll	SK1G00058827	IAA17	0.626857	0.79021	23989	15404	0.272	0.328	0.33405346289623	1.81124244445378e-33	6.67044367443437e-29	up	IAA17	XP_015640226.1 auxin-responsive protein IAA17 [Oryza sativa Japonica Group]	Environmental Information Processing	Signal transduction	ko04075//Plant hormone signal transduction	K14484	-	-	-
Mesophyll	SK1G00051050	SK1G00051050	0.83798	1.03676	23989	15404	0.325	0.381	0.307060944973274	1.9313285052658e-33	7.11269661919289e-29	up	--	EAY84966.1 hypothetical protein OsI_06331 [Oryza sativa Indica Group]	-	-	-	-	-	-	-
Mesophyll	SK1G00054598	COPE1	0.463953	0.584306	23989	15404	0.2	0.252	0.332681793855508	2.03109587907902e-33	7.48011990347223e-29	up	COPE1	XP_015635608.1 coatomer subunit epsilon-1 [Oryza sativa Japonica Group]	-	-	-	-	-	GO:0005515//protein binding	-
Mesophyll	SK1G00042367	SK1G00042367-SALT	4.65068	5.60884	23989	15404	0.374	0.436	0.270256417397424	2.14561952414393e-33	7.90188758351727e-29	up	SALT	A2WPN7.2 RecName: Full=Salt stress-induced protein; Short=Salt protein; AltName: Full=Protein lectin-like; AltName: Full=Protein mannose-binding lectin [Oryza sativa Indica Group]	-	-	-	-	-	-	-
Mesophyll	SK1G00051706	Os02g0134000	0.869677	0.695671	23989	15404	0.337	0.284	-0.322034	2.15097313420825e-33	7.92160385866216e-29	down	Os02g0134000	B9F2L1.1 RecName: Full=Phosphopantetheine adenylyltransferase 2; AltName: Full=Dephospho-CoA pyrophosphorylase 2; AltName: Full=Pantetheine-phosphate adenylyltransferase 2 [Oryza sativa Japonica Group]	Metabolism;Metabolism	Global and overview maps;Metabolism of cofactors and vitamins	ko01100//Metabolic pathways;ko00770//Pantothenate and CoA biosynthesis	K02201;K02201	-	-	-
Mesophyll	SK1G00061000	SK1G00061000-TS2	0.509336	0.674244	23989	15404	0.138	0.184	0.404583011921218	3.33676275814315e-33	1.22886298856896e-28	up	TS2	XP_015646759.1 momilactone A synthase-like [Oryza sativa Japonica Group]	-	-	-	-	-	GO:0003824//catalytic activity;GO:0003854//3-beta-hydroxy-delta5-steroid dehydrogenase activity;GO:0004316//3-oxoacyl-[acyl-carrier-protein] reductase (NADPH) activity;GO:0004757//sepiapterin reductase activity;GO:0008667//2,3-dihydro-2,3-dihydroxybenzoate dehydrogenase activity;GO:0008678//2-deoxy-D-gluconate 3-dehydrogenase activity;GO:0016491//oxidoreductase activity;GO:0016616//oxidoreductase…	GO:0000272//polysaccharide catabolic process;GO:0006633//fatty acid biosynthetic process;GO:0006694//steroid biosynthetic process;GO:0006729//tetrahydrobiopterin biosynthetic process;GO:0015995//chlorophyll biosynthetic process;GO:0055114//oxidation-reduction process
Mesophyll	SK1G00040019	HSPRO2	0.616824	0.476286	23989	15404	0.268	0.221	-0.372961	3.56374147639722e-33	1.31245471092757e-28	down	HSPRO2	XP_015638006.1 nematode resistance protein-like HSPRO1 [Oryza sativa Japonica Group]	-	-	-	-	-	-	GO:0006952//defense response
Mesophyll	SK1G00074752	SK1G00074752-At5g03610	0.717971	0.539623	23989	15404	0.241	0.192	-0.411908	5.1322113300996e-33	1.89009078864908e-28	down	At5g03610	EEC85084.1 hypothetical protein OsI_32442 [Oryza sativa Indica Group]	-	-	-	-	-	GO:0016788//hydrolase activity, acting on ester bonds	-
Mesophyll	SK1G00071328	SK1G00071328-BTF3	0.20242	0.280353	23989	15404	0.099	0.139	0.469696474053987	5.56459237520176e-33	2.0493280799393e-28	up	BTF3	EEC67196.1 hypothetical protein OsI_34071 [Oryza sativa Indica Group]	-	-	-	-	-	-	-
Mesophyll	SK1G00070826	PUB36	0.654941	0.49961	23989	15404	0.251	0.202	-0.390495	6.12010131408952e-33	2.25391091195289e-28	down	PUB36	EAY79460.1 hypothetical protein OsI_34591 [Oryza sativa Indica Group]	-	-	-	-	-	GO:0004842//ubiquitin-protein transferase activity;GO:0042578//phosphoric ester hydrolase activity	GO:0008152//metabolic process;GO:0016567//protein ubiquitination
Mesophyll	SK1G00055432	PRP8A	0.412592	0.553511	23989	15404	0.174	0.223	0.42380729291986	6.25809841927027e-33	2.30473248584885e-28	up	PRP8A	BAD67606.1 putative splicing factor Prp8 [Oryza sativa Japonica Group]	Genetic Information Processing	Transcription	ko03040//Spliceosome	K12856	GO:0000795//synaptonemal complex	GO:0003723//RNA binding;GO:0003964//RNA-directed DNA polymerase activity;GO:0005515//protein binding;GO:0008237//metallopeptidase activity;GO:0017070//U6 snRNA binding;GO:0030623//U5 snRNA binding;GO:0070122//isopeptidase activity	GO:0000373//Group II intron splicing;GO:0000398//mRNA splicing, via spliceosome;GO:0007130//synaptonemal complex assembly;GO:0070193//synaptonemal complex organization
Mesophyll	SK1G00046536	TS2	0.549927	0.732161	23989	15404	0.17	0.219	0.412856454849746	6.62965262071935e-33	2.44156846715852e-28	up	TS2	XP_015628717.1 sex determination protein tasselseed-2 [Oryza sativa Japonica Group]	-	-	-	-	-	GO:0003824//catalytic activity;GO:0003854//3-beta-hydroxy-delta5-steroid dehydrogenase activity;GO:0003978//UDP-glucose 4-epimerase activity;GO:0004316//3-oxoacyl-[acyl-carrier-protein] reductase (NADPH) activity;GO:0004757//sepiapterin reductase activity;GO:0008460//dTDP-glucose 4,6-dehydratase activity;GO:0008667//2,3-dihydro-2,3-dihydroxybenzoate dehydrogenase activity;GO:0008678//2-deoxy-D-gl…	GO:0000272//polysaccharide catabolic process;GO:0006012//galactose metabolic process;GO:0006631//fatty acid metabolic process;GO:0006633//fatty acid biosynthetic process;GO:0006694//steroid biosynthetic process;GO:0006729//tetrahydrobiopterin biosynthetic process;GO:0008152//metabolic process;GO:0009243//O antigen biosynthetic process;GO:0015995//chlorophyll biosynthetic process;GO:0019305//dTDP-…
Mesophyll	SK1G00062086	RD19D	0.295545	0.190984	23989	15404	0.111	0.075	-0.629658	6.91533126809112e-33	2.5467781994126e-28	down	RD19D	EEC82027.1 hypothetical protein OsI_25996 [Oryza sativa Indica Group]	Organismal Systems	Environmental adaptation	ko04626//Plant-pathogen interaction	K01373	-	GO:0008234//cysteine-type peptidase activity	GO:0006508//proteolysis
Mesophyll	SK1G00048155	SK1G00048155-XI-B	0.187621	0.276805	23989	15404	0.09	0.128	0.560796588266383	6.93663786047291e-33	2.55462499125496e-28	up	XI-B	BAD21517.1 putative myosin subfamily XI heavy chain [Oryza sativa Japonica Group]	-	-	-	-	GO:0016459//myosin complex	GO:0000155//phosphorelay sensor kinase activity;GO:0003774//motor activity;GO:0004672//protein kinase activity;GO:0005515//protein binding;GO:0005524//ATP binding	GO:0000160//phosphorelay signal transduction system;GO:0000910//cytokinesis;GO:0006109//regulation of carbohydrate metabolic process;GO:0006810//transport;GO:0007059//chromosome segregation;GO:0030261//chromosome condensation
Mesophyll	SK1G00049721	OsI_07785	0.34267	0.462214	23989	15404	0.149	0.195	0.43163257227552	7.74533656290583e-33	2.85245254938696e-28	up	OsI_07785	B8AEC1.1 RecName: Full=NAP1-related protein 2; AltName: Full=Protein SET homolog 2 [Oryza sativa Indica Group]	-	-	-	-	GO:0005634//nucleus	-	GO:0006334//nucleosome assembly
Mesophyll	SK1G00043762	RBX1A	0.885237	1.0702	23989	15404	0.35	0.409	0.273721132899632	1.13412709349168e-32	4.17676325991117e-28	up	RBX1A	XP_015618780.1 RING-box protein 1a [Oryza sativa Japonica Group]	Genetic Information Processing;Genetic Information Processing;Genetic Information Processing	Folding, sorting and degradation;Folding, sorting and degradation;Replication and repair	ko04141//Protein processing in endoplasmic reticulum;ko04120//Ubiquitin mediated proteolysis;ko03420//Nucleotide excision repair	K03868;K03868;K03868	GO:0005680//anaphase-promoting complex	GO:0008270//zinc ion binding;GO:0046872//metal ion binding;GO:0061630//ubiquitin protein ligase activity;GO:0097602//cullin family protein binding	GO:0031145//anaphase-promoting complex-dependent proteasomal ubiquitin-dependent protein catabolic process
Mesophyll	SK1G00046834	HSP17.4	0.584093	0.453781	23989	15404	0.131	0.094	-0.364133	1.30562360045512e-32	4.80835059575611e-28	down	HSP17.4	XP_015631117.1 17.4 kDa class I heat shock protein [Oryza sativa Japonica Group]	Genetic Information Processing	Folding, sorting and degradation	ko04141//Protein processing in endoplasmic reticulum	K13993	-	-	-
Mesophyll	SK1G00058390	SK1G00058390-At2g19130	0.956672	0.767207	23989	15404	0.341	0.292	-0.318371	1.47984961505718e-32	5.44999016233257e-28	down	At2g19130	XP_015639955.1 G-type lectin S-receptor-like serine/threonine-protein kinase At2g19130 isoform X1 [Oryza sativa Japonica Group]	-	-	-	-	-	GO:0004672//protein kinase activity;GO:0005524//ATP binding	GO:0006468//protein phosphorylation;GO:0048544//recognition of pollen
Mesophyll	SK1G00060680	SK1G00060680-WRKY46	0.346214	0.507067	23989	15404	0.113	0.154	0.55038002673804	2.03046946944108e-32	7.47781296205762e-28	up	WRKY46	KAB8100665.1 hypothetical protein EE612_031245 [Oryza sativa]	-	-	-	-	-	GO:0003700//transcription factor activity, sequence-specific DNA binding;GO:0043565//sequence-specific DNA binding	GO:0006355//regulation of transcription, DNA-templated
Mesophyll	SK1G00040103	ERG1	1.33738	1.09235	23989	15404	0.421	0.376	-0.291946	2.34867261504823e-32	8.64969150669962e-28	down	ERG1	XP_015616516.1 elicitor-responsive protein 1 [Oryza sativa Japonica Group]	-	-	-	-	-	-	-
Mesophyll	SK1G00057474	SK1G00057474-AVP1	0.965862	1.20481	23989	15404	0.327	0.382	0.318887472889596	2.51884544519186e-32	9.27640400555259e-28	up	AVP1	XP_015643082.1 pyrophosphate-energized vacuolar membrane proton pump [Oryza sativa Japonica Group]	-	-	-	-	GO:0005887//integral component of plasma membrane;GO:0016020//membrane	GO:0004427//inorganic diphosphatase activity;GO:0009678//hydrogen-translocating pyrophosphatase activity	GO:0015992//proton transport;GO:1902600//hydrogen ion transmembrane transport
Mesophyll	SK1G00043204	BZR2	0.388096	0.284624	23989	15404	0.178	0.134	-0.44722	2.59952209028e-32	9.57351995408318e-28	down	BZR2	EEC70129.1 hypothetical protein OsI_00807 [Oryza sativa Indica Group]	-	-	-	-	-	-	-
Mesophyll	SK1G00040581	GSTF2	1.37185	1.71628	23989	15404	0.344	0.399	0.323137731731725	3.38042898302065e-32	1.24494438586685e-27	up	GSTF2	XP_015614423.1 probable glutathione S-transferase GSTF2 [Oryza sativa Japonica Group]	Metabolism;Metabolism	Global and overview maps;Metabolism of other amino acids	ko01100//Metabolic pathways;ko00480//Glutathione metabolism	K00799;K00799	-	GO:0005515//protein binding;GO:0016034//maleylacetoacetate isomerase activity;GO:0016614//oxidoreductase activity, acting on CH-OH group of donors	GO:0006559//L-phenylalanine catabolic process;GO:0006572//tyrosine catabolic process;GO:0006749//glutathione metabolic process;GO:0055114//oxidation-reduction process
Mesophyll	SK1G00069489	RBCS-A	0.336155	0.217103	23989	15404	0.118	0.1	-0.630515	3.77246243690209e-32	1.3893224662623e-27	down	RBCS-A	XP_015619409.1 ribulose bisphosphate carboxylase small chain A, chloroplastic-like [Oryza sativa Japonica Group]	Metabolism;Metabolism;Metabolism;Metabolism;Metabolism	Global and overview maps;Global and overview maps;Global and overview maps;Energy metabolism;Carbohydrate metabolism	ko01100//Metabolic pathways;ko01110//Biosynthesis of secondary metabolites;ko01200//Carbon metabolism;ko00710//Carbon fixation in photosynthetic organisms;ko00630//Glyoxylate and dicarboxylate metabolism	K01602;K01602;K01602;K01602;K01602	-	-	-
Mesophyll	SK1G00064472	SK1G00064472-CCR1	10.2555	8.41919	23989	15404	0.621	0.565	-0.284635	4.14376682462146e-32	1.52606644617159e-27	down	CCR1	XP_015650109.1 cinnamoyl-CoA reductase 1 [Oryza sativa Japonica Group]	Metabolism;Metabolism;Metabolism	Global and overview maps;Global and overview maps;Biosynthesis of other secondary metabolites	ko01100//Metabolic pathways;ko01110//Biosynthesis of secondary metabolites;ko00940//Phenylpropanoid biosynthesis	K09753;K09753;K09753	-	GO:0003824//catalytic activity;GO:0003854//3-beta-hydroxy-delta5-steroid dehydrogenase activity;GO:0003978//UDP-glucose 4-epimerase activity;GO:0008446//GDP-mannose 4,6-dehydratase activity;GO:0008460//dTDP-glucose 4,6-dehydratase activity;GO:0008712//ADP-glyceromanno-heptose 6-epimerase activity;GO:0016616//oxidoreductase activity, acting on the CH-OH group of donors, NAD or NADP as acceptor;GO:…	GO:0000271//polysaccharide biosynthetic process;GO:0005975//carbohydrate metabolic process;GO:0006012//galactose metabolic process;GO:0006694//steroid biosynthetic process;GO:0008152//metabolic process;GO:0009243//O antigen biosynthetic process;GO:0009244//lipopolysaccharide core region biosynthetic process;GO:0019305//dTDP-rhamnose biosynthetic process;GO:0055114//oxidation-reduction process
Mesophyll	SK1G00071605	PCRK2	0.552725	0.411583	23989	15404	0.221	0.176	-0.425289	4.3424909552315e-32	1.59925256899266e-27	down	PCRK2	EEC67045.1 hypothetical protein OsI_33788 [Oryza sativa Indica Group]	-	-	-	-	-	GO:0004672//protein kinase activity;GO:0005524//ATP binding	GO:0006468//protein phosphorylation
Mesophyll	SK1G00073725	SK1G00073725	1.11406	0.914382	23989	15404	0.405	0.354	-0.284933	4.78341236695023e-32	1.76163510650043e-27	down	--	XP_015611919.1 uncharacterized protein LOC4347050 [Oryza sativa Japonica Group]	-	-	-	-	-	-	-
Mesophyll	SK1G00069679	DOX1	0.908105	0.683705	23989	15404	0.241	0.191	-0.409434	5.46202539906124e-32	2.01155471396627e-27	down	DOX1	EAY82977.1 hypothetical protein OsI_38200 [Oryza sativa Indica Group]	Metabolism	Lipid metabolism	ko00592//alpha-Linolenic acid metabolism	K10529	-	-	-
Mesophyll	SK1G00043111	SK1G00043111	0.264333	0.174001	23989	15404	0.119	0.083	-0.602976	5.60933062964142e-32	2.06580428428434e-27	down	--	XP_015622101.1 uncharacterized protein LOC4324646 [Oryza sativa Japonica Group]	-	-	-	-	GO:0005634//nucleus;GO:0005681//spliceosomal complex	-	GO:0000398//mRNA splicing, via spliceosome;GO:0006338//chromatin remodeling;GO:0006355//regulation of transcription, DNA-templated;GO:0043486//histone exchange
Mesophyll	SK1G00074076	HSFB1	1.36944	1.10928	23989	15404	0.41	0.36	-0.303938	6.46980206931979e-32	2.38269870608909e-27	down	HSFB1	KAB8110836.1 hypothetical protein EE612_048278 [Oryza sativa]	-	-	-	-	-	GO:0003700//transcription factor activity, sequence-specific DNA binding;GO:0043565//sequence-specific DNA binding	GO:0006355//regulation of transcription, DNA-templated
Mesophyll	SK1G00040321	PAG1	0.276271	0.372572	23989	15404	0.134	0.178	0.431298847828379	6.47970502131483e-32	2.38634576524983e-27	up	PAG1	XP_015644254.1 proteasome subunit alpha type-3 [Oryza sativa Japonica Group]	Genetic Information Processing	Folding, sorting and degradation	ko03050//Proteasome	K02727	GO:0000502//proteasome complex;GO:0005839//proteasome core complex;GO:0019773//proteasome core complex, alpha-subunit complex	GO:0004175//endopeptidase activity;GO:0004298//threonine-type endopeptidase activity	GO:0006511//ubiquitin-dependent protein catabolic process;GO:0010498//proteasomal protein catabolic process;GO:0051603//proteolysis involved in cellular protein catabolic process
Mesophyll	SK1G00043698	SK1G00043698	1.35654	1.63728	23989	15404	0.428	0.483	0.271346461036184	7.16454030019301e-32	2.63855690175508e-27	up	--	BAS70220.1 Os01g0131600 [Oryza sativa Japonica Group]	-	-	-	-	-	-	-
Mesophyll	SK1G00068685	SK1G00068685-IPMSA	0.827869	1.03349	23989	15404	0.297	0.353	0.320022802479295	9.71006054798984e-32	3.5760210986137e-27	up	IPMSA	XP_015619620.1 2-isopropylmalate synthase A [Oryza sativa Japonica Group]	Metabolism;Metabolism;Metabolism;Metabolism;Metabolism;Metabolism	Global and overview maps;Global and overview maps;Global and overview maps;Carbohydrate metabolism;Global and overview maps;Amino acid metabolism	ko01100//Metabolic pathways;ko01110//Biosynthesis of secondary metabolites;ko01230//Biosynthesis of amino acids;ko00620//Pyruvate metabolism;ko01210//2-Oxocarboxylic acid metabolism;ko00290//Valine, leucine and isoleucine biosynthesis	K01649;K01649;K01649;K01649;K01649;K01649	GO:0005737//cytoplasm	GO:0003824//catalytic activity;GO:0003852//2-isopropylmalate synthase activity;GO:0004410//homocitrate synthase activity;GO:0004736//pyruvate carboxylase activity;GO:0008701//4-hydroxy-2-oxovalerate aldolase activity;GO:0008948//oxaloacetate decarboxylase activity;GO:0015081//sodium ion transmembrane transporter activity;GO:0043714//(R)-citramalate synthase activity	GO:0006094//gluconeogenesis;GO:0006814//sodium ion transport;GO:0009097//isoleucine biosynthetic process;GO:0009098//leucine biosynthetic process;GO:0051188//cofactor biosynthetic process
Mesophyll	SK1G00063709	SDH	0.188496	0.280757	23989	15404	0.086	0.123	0.574536474548064	1.42408000640378e-31	5.24460184758383e-27	up	SDH	EEC83982.1 hypothetical protein OsI_30129 [Oryza sativa Indica Group]	Metabolism;Metabolism;Metabolism	Global and overview maps;Carbohydrate metabolism;Carbohydrate metabolism	ko01100//Metabolic pathways;ko00040//Pentose and glucuronate interconversions;ko00051//Fructose and mannose metabolism	K00008;K00008;K00008	-	GO:0004024//alcohol dehydrogenase activity, zinc-dependent;GO:0008270//zinc ion binding;GO:0008743//L-threonine 3-dehydrogenase activity;GO:0016491//oxidoreductase activity;GO:0016616//oxidoreductase activity, acting on the CH-OH group of donors, NAD or NADP as acceptor;GO:0016655//oxidoreductase activity, acting on NAD(P)H, quinone or similar compound as acceptor;GO:0018467//formaldehyde dehydro…	GO:0006113//fermentation;GO:0006567//threonine catabolic process;GO:0006813//potassium ion transport;GO:0008152//metabolic process;GO:0009404//toxin metabolic process;GO:0010127//mycothiol-dependent detoxification;GO:0019439//aromatic compound catabolic process;GO:0030494//bacteriochlorophyll biosynthetic process;GO:0046292//formaldehyde metabolic process;GO:0055114//oxidation-reduction process
Mesophyll	SK1G00074670	SK1G00074670-HMGB2	1.72166	2.11172	23989	15404	0.257	0.312	0.294606152564758	1.43568234267122e-31	5.28733093158957e-27	up	HMGB2	XP_015651271.1 HMG1/2-like protein isoform X2 [Oryza sativa Japonica Group]	-	-	-	-	-	-	-
Mesophyll	SK1G00059958	FTSH8	0.610688	0.759502	23989	15404	0.253	0.307	0.314572380278339	1.65945280953375e-31	6.1114328069509e-27	up	FTSH8	XP_015639995.1 ATP-dependent zinc metalloprotease FTSH 8, mitochondrial [Oryza sativa Japonica Group]	-	-	-	-	GO:0000502//proteasome complex;GO:0009368//endopeptidase Clp complex;GO:0009376//HslUV protease complex;GO:0009379//Holliday junction helicase complex;GO:0016021//integral component of membrane	GO:0003678//DNA helicase activity;GO:0004176//ATP-dependent peptidase activity;GO:0004222//metalloendopeptidase activity;GO:0004252//serine-type endopeptidase activity;GO:0005198//structural molecule activity;GO:0005524//ATP binding;GO:0008270//zinc ion binding;GO:0009378//four-way junction helicase activity;GO:0016887//ATPase activity;GO:0051082//unfolded protein binding	GO:0006281//DNA repair;GO:0006310//DNA recombination;GO:0006508//proteolysis;GO:0009306//protein secretion;GO:0010498//proteasomal protein catabolic process;GO:0019941//modification-dependent protein catabolic process;GO:0030436//asexual sporulation;GO:0031412//gas vesicle organization;GO:0043335//protein unfolding;GO:0051301//cell division
Mesophyll	SK1G00055519	SUS2	1.59211	1.23566	23989	15404	0.308	0.256	-0.365631	2.05383058774083e-31	7.56384728853194e-27	down	SUS2	XP_015643025.1 sucrose synthase 2 [Oryza sativa Japonica Group]	Metabolism;Metabolism;Metabolism	Global and overview maps;Global and overview maps;Carbohydrate metabolism	ko01100//Metabolic pathways;ko01110//Biosynthesis of secondary metabolites;ko00500//Starch and sucrose metabolism	K00695;K00695;K00695	-	GO:0004373//glycogen (starch) synthase activity;GO:0008194//UDP-glycosyltransferase activity;GO:0009011//starch synthase activity;GO:0016157//sucrose synthase activity;GO:0016757//transferase activity, transferring glycosyl groups	GO:0005978//glycogen biosynthetic process;GO:0005985//sucrose metabolic process;GO:0009058//biosynthetic process;GO:0010125//mycothiol biosynthetic process;GO:0071793//bacillithiol biosynthetic process
Mesophyll	SK1G00063996	CM-LOX2	3.84524	3.15368	23989	15404	0.516	0.469	-0.286029	2.06498959250017e-31	7.60494367125963e-27	down	CM-LOX2	XP_015650450.1 probable lipoxygenase 8, chloroplastic [Oryza sativa Japonica Group]	Metabolism;Metabolism;Metabolism;Metabolism	Global and overview maps;Global and overview maps;Lipid metabolism;Lipid metabolism	ko01100//Metabolic pathways;ko01110//Biosynthesis of secondary metabolites;ko00592//alpha-Linolenic acid metabolism;ko00591//Linoleic acid metabolism	K00454;K00454;K00454;K00454	-	GO:0005515//protein binding;GO:0016702//oxidoreductase activity, acting on single donors with incorporation of molecular oxygen, incorporation of two atoms of oxygen;GO:0046872//metal ion binding	GO:0055114//oxidation-reduction process
Mesophyll	SK1G00065974	SK1G00065974-FBA1	6.1426	4.8065	23989	15404	0.497	0.469	-0.353859	4.88359529135574e-31	1.79853047390049e-26	down	FBA1	XP_015649702.1 fructose-bisphosphate aldolase 6, cytosolic [Oryza sativa Japonica Group]	Metabolism;Metabolism;Metabolism;Metabolism;Metabolism;Metabolism;Metabolism;Metabolism	Global and overview maps;Global and overview maps;Global and overview maps;Global and overview maps;Carbohydrate metabolism;Energy metabolism;Carbohydrate metabolism;Carbohydrate metabolism	ko01100//Metabolic pathways;ko01110//Biosynthesis of secondary metabolites;ko01200//Carbon metabolism;ko01230//Biosynthesis of amino acids;ko00010//Glycolysis / Gluconeogenesis;ko00710//Carbon fixation in photosynthetic organisms;ko00051//Fructose and mannose metabolism;ko00030//Pentose phosphate pathway	K01623;K01623;K01623;K01623;K01623;K01623;K01623;K01623	-	GO:0004332//fructose-bisphosphate aldolase activity	GO:0006096//glycolytic process
Mesophyll	SK1G00044609	PER35	1.68187	1.34813	23989	15404	0.41	0.374	-0.319087	5.10577529033469e-31	1.88035492392446e-26	down	PER35	XP_015628252.1 peroxidase 51 [Oryza sativa Japonica Group]	Metabolism;Metabolism;Metabolism	Global and overview maps;Global and overview maps;Biosynthesis of other secondary metabolites	ko01100//Metabolic pathways;ko01110//Biosynthesis of secondary metabolites;ko00940//Phenylpropanoid biosynthesis	K00430;K00430;K00430	-	GO:0004601//peroxidase activity;GO:0020037//heme binding;GO:0042834//peptidoglycan binding	GO:0006979//response to oxidative stress;GO:0055114//oxidation-reduction process
Mesophyll	SK1G00043322	hxnY	1.15276	0.94265	23989	15404	0.374	0.321	-0.290269	6.99485001665073e-31	2.57606336413213e-26	down	hxnY	XP_015617743.1 2-oxoglutarate-Fe(II) type oxidoreductase hxnY isoform X3 [Oryza sativa Japonica Group]	-	-	-	-	-	GO:0016491//oxidoreductase activity	GO:0055114//oxidation-reduction process
Mesophyll	SK1G00048926	CYP707A5	2.36673	1.92363	23989	15404	0.426	0.375	-0.29905	7.53239604701393e-31	2.77403081619429e-26	down	CYP707A5	XP_015627713.1 abscisic acid 8'-hydroxylase 1 [Oryza sativa Japonica Group]	Metabolism	Metabolism of terpenoids and polyketides	ko00906//Carotenoid biosynthesis	K09843	-	GO:0005506//iron ion binding;GO:0016705//oxidoreductase activity, acting on paired donors, with incorporation or reduction of molecular oxygen;GO:0020037//heme binding	GO:0055114//oxidation-reduction process
Mesophyll	SK1G00066158	ERR26	4.61097	5.54121	23989	15404	0.517	0.574	0.265125142992139	8.45382247614945e-31	3.11337374151632e-26	up	ERR26	XP_015617237.1 metallothionein-like protein 1A [Oryza sativa Japonica Group]	-	-	-	-	-	GO:0008270//zinc ion binding;GO:0046872//metal ion binding	-
Mesophyll	SK1G00051347	SK1G00051347	0.892732	1.08232	23989	15404	0.338	0.392	0.277798375391112	1.37663270445145e-30	5.06986292395379e-26	up	--	KAB8086218.1 hypothetical protein EE612_009388 [Oryza sativa]	-	-	-	-	GO:0000314//organellar small ribosomal subunit;GO:0005840//ribosome;GO:0022627//cytosolic small ribosomal subunit	GO:0003735//structural constituent of ribosome	GO:0006412//translation
Mesophyll	SK1G00045927	179B	0.345205	0.457334	23989	15404	0.165	0.211	0.405692542423232	1.58959223756812e-30	5.85415029251588e-26	up	179B	EAY90376.1 hypothetical protein OsI_11954 [Oryza sativa Indica Group]	Genetic Information Processing	Translation	ko03010//Ribosome	K02998	GO:0000314//organellar small ribosomal subunit;GO:0005840//ribosome;GO:0022627//cytosolic small ribosomal subunit	GO:0003735//structural constituent of ribosome	GO:0006412//translation
Mesophyll	SK1G00054696	BHLH112	0.621148	0.397493	23989	15404	0.139	0.105	-0.643877	2.42797409810433e-30	8.94174300849862e-26	down	BHLH112	EAY95687.1 hypothetical protein OsI_17552 [Oryza sativa Indica Group]	-	-	-	-	GO:0005741//mitochondrial outer membrane	GO:0046983//protein dimerization activity	GO:0006886//intracellular protein transport
Mesophyll	SK1G00058607	HXK7	0.93888	1.17952	23989	15404	0.244	0.296	0.329150504954817	2.47145439175722e-30	9.10187223396349e-26	up	HXK7	EEC78650.1 hypothetical protein OsI_18744 [Oryza sativa Indica Group]	Metabolism;Metabolism;Metabolism;Metabolism;Metabolism;Metabolism;Metabolism;Metabolism	Global and overview maps;Global and overview maps;Global and overview maps;Carbohydrate metabolism;Carbohydrate metabolism;Carbohydrate metabolism;Carbohydrate metabolism;Carbohydrate metabolism	ko01100//Metabolic pathways;ko01110//Biosynthesis of secondary metabolites;ko01200//Carbon metabolism;ko00500//Starch and sucrose metabolism;ko00010//Glycolysis / Gluconeogenesis;ko00520//Amino sugar and nucleotide sugar metabolism;ko00051//Fructose and mannose metabolism;ko00052//Galactose metabolism	K00844;K00844;K00844;K00844;K00844;K00844;K00844;K00844	-	GO:0005524//ATP binding;GO:0016773//phosphotransferase activity, alcohol group as acceptor	GO:0005975//carbohydrate metabolic process
Mesophyll	SK1G00073968	COPT5.1	0.712862	0.563023	23989	15404	0.275	0.225	-0.340377	2.47277390744084e-30	9.10673174632313e-26	down	COPT5.1	EEE69797.1 hypothetical protein OsJ_29521 [Oryza sativa Japonica Group]	-	-	-	-	GO:0016021//integral component of membrane	GO:0005375//copper ion transmembrane transporter activity	GO:0035434//copper ion transmembrane transport
Mesophyll	SK1G00068806	SK1G00068806-LHW	0.379629	0.283443	23989	15404	0.162	0.12	-0.4214	3.51968602678315e-30	1.2962299699437e-25	down	LHW	XP_015619925.1 transcription factor LHW [Oryza sativa Japonica Group]	-	-	-	-	-	GO:0046983//protein dimerization activity	-
Mesophyll	SK1G00065145	SK1G00065145-SDF2	0.49618	0.376897	23989	15404	0.216	0.171	-0.396602	3.7084111256385e-30	1.36573364935015e-25	down	SDF2	KAF2918965.1 hypothetical protein DAI22_08g099400 [Oryza sativa Japonica Group]	-	-	-	-	GO:0005789//endoplasmic reticulum membrane	-	-
Mesophyll	SK1G00073493	PAO6	0.464642	0.328318	23989	15404	0.17	0.133	-0.500899	4.4053707403008e-30	1.62240993623798e-25	down	PAO6	XP_015611019.1 polyamine oxidase [Oryza sativa Japonica Group]	Metabolism;Metabolism;Metabolism	Global and overview maps;Amino acid metabolism;Metabolism of other amino acids	ko01100//Metabolic pathways;ko00330//Arginine and proline metabolism;ko00410//beta-Alanine metabolism	K13366;K13366;K13366	-	GO:0003824//catalytic activity;GO:0004729//oxygen-dependent protoporphyrinogen oxidase activity;GO:0008767//UDP-galactopyranose mutase activity;GO:0016166//phytoene dehydrogenase activity;GO:0016491//oxidoreductase activity;GO:0045550//geranylgeranyl reductase activity;GO:0050662//coenzyme binding	GO:0006779//porphyrin-containing compound biosynthetic process;GO:0009228//thiamine biosynthetic process;GO:0009273//peptidoglycan-based cell wall biogenesis;GO:0015995//chlorophyll biosynthetic process;GO:0016117//carotenoid biosynthetic process;GO:0030494//bacteriochlorophyll biosynthetic process;GO:0055114//oxidation-reduction process
Mesophyll	SK1G00071713	SK1G00071713-ACA7	0.621199	0.77981	23989	15404	0.199	0.248	0.328020172967184	5.2418075036285e-30	1.9304528674363e-25	up	ACA7	XP_015613068.1 calcium-transporting ATPase 7, plasma membrane-type [Oryza sativa Japonica Group]	-	-	-	-	GO:0031004//potassium ion-transporting ATPase complex	GO:0004008//copper-exporting ATPase activity;GO:0004647//phosphoserine phosphatase activity;GO:0005375//copper ion transmembrane transporter activity;GO:0005388//calcium-transporting ATPase activity;GO:0008556//potassium-transporting ATPase activity;GO:0008967//phosphoglycolate phosphatase activity;GO:0015434//cadmium-transporting ATPase activity;GO:0015444//magnesium-importing ATPase activity;GO…	GO:0006545//glycine biosynthetic process;GO:0006564//L-serine biosynthetic process;GO:0006813//potassium ion transport;GO:0006816//calcium ion transport;GO:0006825//copper ion transport;GO:0008152//metabolic process;GO:0015691//cadmium ion transport;GO:0015693//magnesium ion transport;GO:0030001//metal ion transport
Mesophyll	SK1G00043416	SK1G00043416-UXT3	0.679431	0.833583	23989	15404	0.269	0.323	0.294959881164607	6.7071414451169e-30	2.47010605140765e-25	up	UXT3	XP_015619664.1 UDP-xylose transporter 3 [Oryza sativa Japonica Group]	-	-	-	-	GO:0016020//membrane;GO:0016021//integral component of membrane	-	-
Mesophyll	SK1G00056325	SK1G00056325-PA200	0.344851	0.459787	23989	15404	0.155	0.2	0.414885759983972	7.32927865385853e-30	2.69922674264302e-25	up	PA200	XP_015643080.1 proteasome activator subunit 4 [Oryza sativa Japonica Group]	Genetic Information Processing	Folding, sorting and degradation	ko03050//Proteasome	K06699	-	GO:0005515//protein binding	-
Mesophyll	SK1G00061844	SK1G00061844-CRK6	0.376952	0.495611	23989	15404	0.162	0.208	0.394735042940373	8.7738880398552e-30	3.23124748731787e-25	up	CRK6	EEC82208.1 hypothetical protein OsI_26352 [Oryza sativa Indica Group]	-	-	-	-	-	GO:0004672//protein kinase activity;GO:0005524//ATP binding	GO:0006468//protein phosphorylation
Mesophyll	SK1G00051320	SK1G00051320-CYP71Z18	0.536065	0.346991	23989	15404	0.12	0.085	-0.627362	1.07316766548201e-29	3.95226187843716e-25	down	CYP71Z18	KAF2943478.1 hypothetical protein DAI22_02g066600 [Oryza sativa Japonica Group]	-	-	-	-	-	GO:0005506//iron ion binding;GO:0016705//oxidoreductase activity, acting on paired donors, with incorporation or reduction of molecular oxygen;GO:0020037//heme binding	GO:0055114//oxidation-reduction process
Mesophyll	SK1G00043207	SK1G00043207	0.231339	0.154874	23989	15404	0.11	0.076	-0.578604	1.79614405682821e-29	6.61483933248694e-25	down	--	XP_025879533.1 protein GRAVITROPIC IN THE LIGHT 1 [Oryza sativa Japonica Group]	-	-	-	-	-	-	-
Mesophyll	SK1G00053064	TIF3H1	0.144787	0.207003	23989	15404	0.075	0.108	0.515427618429318	1.84348098402868e-29	6.78917176798084e-25	up	TIF3H1	XP_015633560.1 eukaryotic translation initiation factor 3 subunit H [Oryza sativa Japonica Group]	Genetic Information Processing	Translation	ko03013//RNA transport	K03247	-	GO:0005515//protein binding;GO:0008237//metallopeptidase activity;GO:0070122//isopeptidase activity	-
Mesophyll	SK1G00068198	IPMSA	0.320675	0.437745	23989	15404	0.14	0.182	0.448858792951739	4.39512531820947e-29	1.61863675219018e-24	up	IPMSA	XP_015616654.1 2-isopropylmalate synthase A [Oryza sativa Japonica Group]	Metabolism;Metabolism;Metabolism;Metabolism;Metabolism;Metabolism	Global and overview maps;Global and overview maps;Global and overview maps;Carbohydrate metabolism;Global and overview maps;Amino acid metabolism	ko01100//Metabolic pathways;ko01110//Biosynthesis of secondary metabolites;ko01230//Biosynthesis of amino acids;ko00620//Pyruvate metabolism;ko01210//2-Oxocarboxylic acid metabolism;ko00290//Valine, leucine and isoleucine biosynthesis	K01649;K01649;K01649;K01649;K01649;K01649	GO:0005737//cytoplasm	GO:0003824//catalytic activity;GO:0003852//2-isopropylmalate synthase activity;GO:0004410//homocitrate synthase activity;GO:0004736//pyruvate carboxylase activity;GO:0008701//4-hydroxy-2-oxovalerate aldolase activity;GO:0008948//oxaloacetate decarboxylase activity;GO:0015081//sodium ion transmembrane transporter activity;GO:0043714//(R)-citramalate synthase activity	GO:0006094//gluconeogenesis;GO:0006814//sodium ion transport;GO:0009097//isoleucine biosynthetic process;GO:0009098//leucine biosynthetic process;GO:0051188//cofactor biosynthetic process
Mesophyll	SK1G00041548	dnajb6-a	0.965186	1.17539	23989	15404	0.293	0.347	0.284230784673474	4.69794868461381e-29	1.73016054156957e-24	up	dnajb6-a	KAF2951092.1 hypothetical protein DAI22_01g237000 [Oryza sativa Japonica Group]	-	-	-	-	-	GO:0005515//protein binding	GO:0006457//protein folding;GO:0009408//response to heat
Mesophyll	SK1G00061329	SK1G00061329	0.492513	0.308381	23989	15404	0.103	0.071	-0.675274	6.17983315408194e-29	2.2759089539853e-24	down	--	XP_015646222.1 uncharacterized protein LOC4343848 [Oryza sativa Japonica Group]	-	-	-	-	-	-	-
Mesophyll	SK1G00046503	slr1780	0.372908	0.47221	23989	15404	0.147	0.19	0.34052741391829	8.45708068238766e-29	3.11457367370973e-24	up	slr1780	XP_015628146.1 uncharacterized protein LOC4332730 [Oryza sativa Japonica Group]	-	-	-	-	-	-	-
Mesophyll	SK1G00050505	SK1G00050505-XAT2	0.38573	0.506904	23989	15404	0.16	0.204	0.394033135858402	1.15108594328556e-28	4.23921931193207e-24	up	XAT2	XP_015622780.1 uncharacterized protein LOC4329205 [Oryza sativa Japonica Group]	-	-	-	-	-	-	-
Mesophyll	SK1G00048475	PBA1	0.610204	0.735881	23989	15404	0.257	0.31	0.270141114590251	1.23963300312993e-28	4.56532042392691e-24	up	PBA1	XP_015625800.1 proteasome subunit beta type-6 [Oryza sativa Japonica Group]	Genetic Information Processing	Folding, sorting and degradation	ko03050//Proteasome	K02738	GO:0000502//proteasome complex;GO:0005839//proteasome core complex;GO:0009376//HslUV protease complex	GO:0004175//endopeptidase activity;GO:0004176//ATP-dependent peptidase activity;GO:0004298//threonine-type endopeptidase activity	GO:0006508//proteolysis;GO:0010498//proteasomal protein catabolic process;GO:0051603//proteolysis involved in cellular protein catabolic process
Mesophyll	SK1G00060891	SK1G00060891-R40G2	0.489775	0.612114	23989	15404	0.132	0.173	0.321621727205208	1.24552595605832e-28	4.58702299097158e-24	up	R40G2	EAZ05175.1 hypothetical protein OsI_27370 [Oryza sativa Indica Group]	-	-	-	-	-	-	-
Mesophyll	SK1G00042069	RH3	0.491002	0.629426	23989	15404	0.177	0.224	0.358243972095822	1.465480367401e-28	5.39707109706439e-24	up	RH3	ABA97831.1 retrotransposon protein, putative, Ty3-gypsy subclass [Oryza sativa Japonica Group]	-	-	-	-	-	-	GO:0010112//regulation of systemic acquired resistance
Mesophyll	SK1G00058881	SK1G00058881-At4g28440	0.271785	0.350106	23989	15404	0.124	0.164	0.365208625301159	1.52086938528959e-28	5.60105777214451e-24	up	At4g28440	XP_015637753.1 uncharacterized protein At4g28440 [Oryza sativa Japonica Group]	Genetic Information Processing;Genetic Information Processing;Genetic Information Processing;Genetic Information Processing	Replication and repair;Replication and repair;Replication and repair;Replication and repair	ko03420//Nucleotide excision repair;ko03440//Homologous recombination;ko03030//DNA replication;ko03430//Mismatch repair	K07466;K07466;K07466;K07466	-	-	-
Mesophyll	SK1G00043455	PLD1	0.977006	1.17723	23989	15404	0.324	0.378	0.268932918738313	2.05227892531651e-28	7.55813282615566e-24	up	PLD1	EEC70024.1 hypothetical protein OsI_00588 [Oryza sativa Indica Group]	Metabolism;Metabolism;Cellular Processes;Metabolism;Metabolism	Global and overview maps;Global and overview maps;Transport and catabolism;Lipid metabolism;Lipid metabolism	ko01100//Metabolic pathways;ko01110//Biosynthesis of secondary metabolites;ko04144//Endocytosis;ko00564//Glycerophospholipid metabolism;ko00565//Ether lipid metabolism	K01115;K01115;K01115;K01115;K01115	-	GO:0003824//catalytic activity;GO:0008808//cardiolipin synthase activity	GO:0032049//cardiolipin biosynthetic process
Mesophyll	SK1G00041802	CYP76M7	1.42559	1.06692	23989	15404	0.276	0.239	-0.418071	2.11390164156016e-28	7.78507696553776e-24	down	CYP76M7	XP_015628496.1 ent-cassadiene C11-alpha-hydroxylase 1-like [Oryza sativa Japonica Group]	Metabolism;Metabolism	Global and overview maps;Metabolism of terpenoids and polyketides	ko01110//Biosynthesis of secondary metabolites;ko00904//Diterpenoid biosynthesis	K16084;K16084	-	GO:0005506//iron ion binding;GO:0016705//oxidoreductase activity, acting on paired donors, with incorporation or reduction of molecular oxygen;GO:0020037//heme binding	GO:0009405//pathogenesis;GO:0055114//oxidation-reduction process
Mesophyll	SK1G00065786	SK1G00065786-RPL34	0.886221	1.06361	23989	15404	0.32	0.374	0.263200339719798	2.90034245566474e-28	1.06813811957221e-23	up	RPL34	XP_006659132.1 PREDICTED: 60S ribosomal protein L34-like [Oryza brachyantha]	Genetic Information Processing	Translation	ko03010//Ribosome	K02915	GO:0005840//ribosome	GO:0003735//structural constituent of ribosome	GO:0006412//translation
Mesophyll	SK1G00051708	Os07g0631100	0.323832	0.479567	23989	15404	0.107	0.141	0.566340222409955	2.90702307575894e-28	1.0705984583405e-23	up	Os07g0631100	XP_015622895.1 transcription elongation factor 1 homolog [Oryza sativa Japonica Group]	-	-	-	-	-	-	-
Mesophyll	SK1G00061314	SK1G00061314-CPN10	0.63239	0.7999	23989	15404	0.225	0.274	0.338958049315293	4.6021641410865e-28	1.69488500987934e-23	up	CPN10	XP_015647372.1 10 kDa chaperonin, mitochondrial [Oryza sativa Japonica Group]	-	-	-	-	-	GO:0005524//ATP binding;GO:0016887//ATPase activity	GO:0006457//protein folding
Mesophyll	SK1G00052825	SK1G00052825-CRK25	0.291705	0.196111	23989	15404	0.127	0.097	-0.572598	6.61252866094188e-28	2.43526205525168e-23	down	CRK25	XP_015633954.1 cysteine-rich receptor-like protein kinase 6 [Oryza sativa Japonica Group]	-	-	-	-	-	-	-
Mesophyll	SK1G00040530	UBP13	0.308056	0.409093	23989	15404	0.148	0.191	0.409122866490967	7.21942083833683e-28	2.65876830634269e-23	up	UBP13	XP_015612854.1 ubiquitin carboxyl-terminal hydrolase 13 [Oryza sativa Japonica Group]	-	-	-	-	-	GO:0004843//thiol-dependent ubiquitin-specific protease activity;GO:0005515//protein binding	GO:0007165//signal transduction;GO:0016579//protein deubiquitination
Mesophyll	SK1G00043683	MHZ4	0.32658	0.450942	23989	15404	0.132	0.173	0.465384943840307	8.4850741301379e-28	3.12488310064718e-23	up	MHZ4	XP_015614499.1 protein MAO HUZI 4, chloroplastic [Oryza sativa Japonica Group]	-	-	-	-	-	-	-
Mesophyll	SK1G00041259	UBC5A	0.870685	0.712766	23989	15404	0.344	0.3	-0.288686	9.361692170331e-28	3.4477239924895e-23	down	UBC5A	XP_015650522.1 ubiquitin-conjugating enzyme E2 5A [Oryza sativa Japonica Group]	Genetic Information Processing;Genetic Information Processing	Folding, sorting and degradation;Folding, sorting and degradation	ko04141//Protein processing in endoplasmic reticulum;ko04120//Ubiquitin mediated proteolysis	K06689;K06689	-	GO:0005515//protein binding	GO:0006464//cellular protein modification process;GO:0015031//protein transport
Mesophyll	SK1G00057454	SK1G00057454-RPL35	0.173455	0.241872	23989	15404	0.089	0.124	0.479449259239233	9.39907752983853e-28	3.46149227268893e-23	up	RPL35	XP_015641634.1 50S ribosomal protein L35, chloroplastic [Oryza sativa Japonica Group]	Genetic Information Processing	Translation	ko03010//Ribosome	K02916	GO:0000315//organellar large ribosomal subunit;GO:0005840//ribosome;GO:0022625//cytosolic large ribosomal subunit	GO:0003735//structural constituent of ribosome	GO:0006412//translation
Mesophyll	SK1G00063162	SK1G00063162-At2g30620	13.072	16.5877	23989	15404	0.555	0.603	0.343627301616098	1.06567899425316e-27	3.92468260003555e-23	up	At2g30620	EAZ03015.1 hypothetical protein OsI_25157 [Oryza sativa Indica Group]	-	-	-	-	GO:0000786//nucleosome	GO:0003677//DNA binding	GO:0006334//nucleosome assembly
Mesophyll	SK1G00073061	SK1G00073061-RPL17	0.553135	0.675137	23989	15404	0.242	0.293	0.287501184958211	1.16361097822895e-27	4.28534651062156e-23	up	RPL17	XP_015612256.1 60S ribosomal protein L17 [Oryza sativa Japonica Group]	Genetic Information Processing	Translation	ko03010//Ribosome	K02880	GO:0000311//plastid large ribosomal subunit;GO:0005840//ribosome;GO:0022625//cytosolic large ribosomal subunit	GO:0003735//structural constituent of ribosome	GO:0006412//translation
Mesophyll	SK1G00050982	SK1G00050982-RPS24A	1.03577	1.24488	23989	15404	0.342	0.395	0.265274204241683	1.25984183138977e-27	4.63974549664226e-23	up	RPS24A	XP_015623021.1 40S ribosomal protein S24-1 [Oryza sativa Japonica Group]	Genetic Information Processing	Translation	ko03010//Ribosome	K02974	GO:0005840//ribosome	GO:0003735//structural constituent of ribosome;GO:0005085//guanyl-nucleotide exchange factor activity	GO:0006412//translation
Mesophyll	SK1G00054964	AOX4	0.629599	0.774859	23989	15404	0.242	0.292	0.299456887256278	1.49865063623385e-27	5.51923056312201e-23	up	AOX4	XP_015633460.1 ubiquinol oxidase 4, chloroplastic/chromoplastic [Oryza sativa Japonica Group]	-	-	-	-	-	GO:0004497//monooxygenase activity;GO:0009916//alternative oxidase activity	GO:0006744//ubiquinone biosynthetic process;GO:0055114//oxidation-reduction process
Mesophyll	SK1G00059006	SK1G00059006-RPL15	0.622302	0.763899	23989	15404	0.261	0.312	0.295724315641417	1.50908068979041e-27	5.55764236436014e-23	up	RPL15	XP_015632743.1 60S ribosomal protein L15 [Oryza sativa Japonica Group]	Genetic Information Processing	Translation	ko03010//Ribosome	K02877	GO:0005840//ribosome	GO:0003735//structural constituent of ribosome	GO:0006412//translation
Mesophyll	SK1G00068251	PAP20	0.203083	0.281187	23989	15404	0.089	0.124	0.469264715944746	1.62673352268058e-27	5.99093421732803e-23	up	PAP20	XP_015615680.1 probable purple acid phosphatase 20 [Oryza sativa Japonica Group]	-	-	-	-	-	GO:0003993//acid phosphatase activity;GO:0016787//hydrolase activity;GO:0046872//metal ion binding	-
Mesophyll	SK1G00045603	SK1G00045603	0.241174	0.341389	23989	15404	0.107	0.143	0.501165619878849	1.64337949151882e-27	6.05223799136551e-23	up	--	XP_015631223.1 protein DEK [Oryza sativa Japonica Group]	-	-	-	-	-	-	-
Mesophyll	SK1G00042098	SK1G00042098-MUCI21	0.286796	0.200356	23989	15404	0.135	0.103	-0.517242	2.70573882777813e-27	9.96469495494128e-23	down	MUCI21	XP_015630503.1 uncharacterized protein LOC4324540 [Oryza sativa Japonica Group]	-	-	-	-	-	-	-
Mesophyll	SK1G00046355	SK1G00046355	0.64695	0.813346	23989	15404	0.246	0.294	0.330168615113679	2.92110142861033e-27	1.07578323412861e-22	up	--	XP_015628910.1 uncharacterized protein LOC4332805 [Oryza sativa Japonica Group]	-	-	-	-	GO:0009523//photosystem II;GO:0009654//photosystem II oxygen evolving complex;GO:0016020//membrane;GO:0019898//extrinsic component of membrane	GO:0005509//calcium ion binding	GO:0015979//photosynthesis
Mesophyll	SK1G00039802	SK1G00039802	0.930078	0.767854	23989	15404	0.365	0.319	-0.276487	3.17879070412886e-27	1.17068504051658e-22	down	--	XP_015642462.1 protein AUXIN-REGULATED GENE INVOLVED IN ORGAN SIZE [Oryza sativa Japonica Group]	-	-	-	-	-	-	-
Mesophyll	SK1G00053191	At1g29880	0.781997	0.944566	23989	15404	0.316	0.368	0.272456605052839	3.4527693265893e-27	1.27158588759631e-22	up	At1g29880	CAH66534.1 H0209H04.1 [Oryza sativa]	Genetic Information Processing	Translation	ko00970//Aminoacyl-tRNA biosynthesis	K01880	GO:0005737//cytoplasm;GO:0009345//glycine-tRNA ligase complex	GO:0000166//nucleotide binding;GO:0004812//aminoacyl-tRNA ligase activity;GO:0004820//glycine-tRNA ligase activity;GO:0004821//histidine-tRNA ligase activity;GO:0004827//proline-tRNA ligase activity;GO:0004829//threonine-tRNA ligase activity;GO:0005524//ATP binding	GO:0006418//tRNA aminoacylation for protein translation;GO:0006426//glycyl-tRNA aminoacylation;GO:0006427//histidyl-tRNA aminoacylation;GO:0006433//prolyl-tRNA aminoacylation;GO:0006435//threonyl-tRNA aminoacylation
Mesophyll	SK1G00071185	SK1G00071185	0.55256	0.689278	23989	15404	0.239	0.287	0.318902425595488	3.73213463993405e-27	1.37447054519491e-22	up	--	EEC67225.1 hypothetical protein OsI_34141 [Oryza sativa Indica Group]	-	-	-	-	-	GO:0003676//nucleic acid binding	-
Mesophyll	SK1G00045546	NRPB6A	0.181405	0.25799	23989	15404	0.089	0.123	0.50786302579541	4.23998057545314e-27	1.56150004632788e-22	up	NRPB6A	EAY90802.1 hypothetical protein OsI_12404 [Oryza sativa Indica Group]	Genetic Information Processing	Transcription	ko03020//RNA polymerase	K03014	-	GO:0003677//DNA binding;GO:0003899//DNA-directed RNA polymerase activity	GO:0006351//transcription, DNA-templated
Mesophyll	SK1G00057956	SK1G00057956-PBL19	0.292083	0.379237	23989	15404	0.132	0.172	0.376605076692445	4.64956357611717e-27	1.71234127381243e-22	up	PBL19	XP_015642681.1 probable serine/threonine-protein kinase PBL19 [Oryza sativa Japonica Group]	-	-	-	-	-	GO:0004672//protein kinase activity;GO:0005524//ATP binding	GO:0006468//protein phosphorylation
Mesophyll	SK1G00049970	Os02g0532500	0.740162	0.590152	23989	15404	0.292	0.248	-0.326705	4.73657569885041e-27	1.74438609837263e-22	down	Os02g0532500	EAY86147.1 hypothetical protein OsI_07520 [Oryza sativa Indica Group]	-	-	-	-	-	-	-
Mesophyll	SK1G00043596	H2B.5	1.60955	1.95748	23989	15404	0.292	0.344	0.282320141665928	7.25944933435193e-27	2.67351000085513e-22	up	H2B.5	KAF0918260.1 hypothetical protein E2562_023342 [Oryza meyeriana var. granulata] [Oryza meyeriana]	-	-	-	-	GO:0005669//transcription factor TFIID complex	GO:0003677//DNA binding;GO:0005515//protein binding	GO:0006352//DNA-templated transcription, initiation;GO:0009405//pathogenesis
Mesophyll	SK1G00059486	SK1G00059486-At3g12390	0.643139	0.811799	23989	15404	0.238	0.284	0.33594457517843	7.34558274137529e-27	2.70523121199369e-22	up	At3g12390	EAY97804.1 hypothetical protein OsI_19723 [Oryza sativa Indica Group]	-	-	-	-	GO:0000775//chromosome, centromeric region	GO:0003677//DNA binding;GO:0003682//chromatin binding	-
Mesophyll	SK1G00040274	PGM1	0.664251	0.855614	23989	15404	0.264	0.309	0.365182011996749	8.37294353799608e-27	3.0835876461732e-22	up	PGM1	EEC71703.1 hypothetical protein OsI_04213 [Oryza sativa Indica Group]	Metabolism;Metabolism;Metabolism;Metabolism;Metabolism;Metabolism	Global and overview maps;Global and overview maps;Global and overview maps;Global and overview maps;Carbohydrate metabolism;Amino acid metabolism	ko01100//Metabolic pathways;ko01110//Biosynthesis of secondary metabolites;ko01200//Carbon metabolism;ko01230//Biosynthesis of amino acids;ko00010//Glycolysis / Gluconeogenesis;ko00260//Glycine, serine and threonine metabolism	K15633;K15633;K15633;K15633;K15633;K15633	GO:0005737//cytoplasm	GO:0003824//catalytic activity;GO:0004619//phosphoglycerate mutase activity;GO:0030145//manganese ion binding;GO:0046537//2,3-bisphosphoglycerate-independent phosphoglycerate mutase activity;GO:0046872//metal ion binding	GO:0006007//glucose catabolic process;GO:0006094//gluconeogenesis;GO:0006096//glycolytic process
Mesophyll	SK1G00064845	PRN2	0.398927	0.558027	23989	15404	0.106	0.143	0.484108160630696	9.33783568023484e-27	3.43893812431689e-22	up	PRN2	XP_015650594.1 pirin-like protein isoform X1 [Oryza sativa Japonica Group]	-	-	-	-	-	-	-
Mesophyll	SK1G00050156	SK1G00050156	0.261185	0.172061	23989	15404	0.102	0.071	-0.601868	9.5999651027107e-27	3.5354751480263e-22	down	--	EEC73254.1 hypothetical protein OsI_07372 [Oryza sativa Indica Group]	-	-	-	-	-	GO:0005515//protein binding	-
Mesophyll	SK1G00054610	CPX	0.311147	0.218117	23989	15404	0.141	0.11	-0.512294	1.05122114049889e-26	3.8714372162293e-22	down	CPX	XP_015633531.1 oxygen-dependent coproporphyrinogen-III oxidase, chloroplastic [Oryza sativa Japonica Group]	Metabolism;Metabolism;Metabolism	Global and overview maps;Global and overview maps;Metabolism of cofactors and vitamins	ko01100//Metabolic pathways;ko01110//Biosynthesis of secondary metabolites;ko00860//Porphyrin and chlorophyll metabolism	K00228;K00228;K00228	-	GO:0004109//coproporphyrinogen oxidase activity	GO:0006779//porphyrin-containing compound biosynthetic process;GO:0055114//oxidation-reduction process
Mesophyll	SK1G00068247	SK1G00068247-CYP94C1	0.469979	0.319703	23989	15404	0.142	0.109	-0.555719	1.32389641739426e-26	4.87564572597957e-22	down	CYP94C1	XP_015615638.1 cytochrome P450 94C1 [Oryza sativa Japonica Group]	-	-	-	-	-	GO:0005506//iron ion binding;GO:0016705//oxidoreductase activity, acting on paired donors, with incorporation or reduction of molecular oxygen;GO:0020037//heme binding	GO:0055114//oxidation-reduction process
Mesophyll	SK1G00054223	SK1G00054223	0.209482	0.301595	23989	15404	0.095	0.129	0.525575504892008	1.46256211582672e-26	5.38632376016666e-22	up	--	CAH66854.1 OSIGBa0103M18.6 [Oryza sativa]	-	-	-	-	-	GO:0097367//carbohydrate derivative binding	GO:1901135//carbohydrate derivative metabolic process
Mesophyll	SK1G00060431	SK1G00060431-AGD14	0.756272	0.614994	23989	15404	0.297	0.251	-0.298289	3.03480731545919e-26	1.11765883813731e-21	down	AGD14	XP_015640360.1 UBA domain-containing protein 3 isoform X2 [Oryza sativa Japonica Group]	-	-	-	-	-	GO:0005096//GTPase activator activity;GO:0008270//zinc ion binding	-
Mesophyll	SK1G00049598	NAR2.1	0.317697	0.206057	23989	15404	0.106	0.075	-0.624363	3.35042851647735e-26	1.23389581404828e-21	down	NAR2.1	XP_015623791.1 high-affinity nitrate transporter-activating protein 2.1 [Oryza sativa Japonica Group]	-	-	-	-	-	-	GO:0010167//response to nitrate;GO:0015706//nitrate transport
Mesophyll	SK1G00039323	RPS10-1	0.484722	0.601921	23989	15404	0.211	0.258	0.312356962204776	6.16844416552338e-26	2.27171461727895e-21	up	RPS10-1	XP_006645354.1 PREDICTED: 40S ribosomal protein S10-like [Oryza brachyantha]	Genetic Information Processing	Translation	ko03010//Ribosome	K02947	-	-	-
Mesophyll	SK1G00065777	SK1G00065777-NRPB1	0.442967	0.57937	23989	15404	0.19	0.232	0.387210179177295	7.06488269276742e-26	2.60185499809238e-21	up	NRPB1	KAF2918154.1 hypothetical protein DAI22_08g036200 [Oryza sativa Japonica Group]	Genetic Information Processing	Transcription	ko03020//RNA polymerase	K03006	GO:0000345//cytosolic DNA-directed RNA polymerase complex;GO:0005886//plasma membrane	GO:0003674//molecular_function;GO:0003677//DNA binding;GO:0003899//DNA-directed RNA polymerase activity	GO:0006351//transcription, DNA-templated;GO:0006366//transcription from RNA polymerase II promoter;GO:0008150//biological_process
Mesophyll	SK1G00048346	CYPRO4	0.49578	0.648462	23989	15404	0.189	0.232	0.387251930646255	8.56509906759459e-26	3.15435468461374e-21	up	CYPRO4	EAY87811.1 hypothetical protein OsI_09230 [Oryza sativa Indica Group]	-	-	-	-	-	GO:0005515//protein binding	-
Mesophyll	SK1G00049503	RSZ23	0.761053	0.926373	23989	15404	0.292	0.34	0.283562649235176	9.10005218434414e-26	3.35136721845026e-21	up	RSZ23	XP_015625856.1 serine/arginine-rich splicing factor RSZ23 isoform X1 [Oryza sativa Japonica Group]	Genetic Information Processing	Transcription	ko03040//Spliceosome	K12896	-	GO:0003676//nucleic acid binding;GO:0008270//zinc ion binding	GO:0008380//RNA splicing
Mesophyll	SK1G00047452	TIF3K1	0.382221	0.490106	23989	15404	0.174	0.217	0.358602982537963	1.04624642908375e-25	3.85311634902963e-21	up	TIF3K1	XP_015632276.1 eukaryotic translation initiation factor 3 subunit K [Oryza sativa Japonica Group]	-	-	-	-	-	-	-
Mesophyll	SK1G00060325	SIR	1.32901	1.08741	23989	15404	0.376	0.331	-0.289422	1.17274189431248e-25	4.31897384837399e-21	down	SIR	XP_015640192.1 sulfite reductase [ferredoxin], chloroplastic [Oryza sativa Japonica Group]	Metabolism;Metabolism	Global and overview maps;Energy metabolism	ko01100//Metabolic pathways;ko00920//Sulfur metabolism	K00392;K00392	-	GO:0004783//sulfite reductase (NADPH) activity;GO:0016002//sulfite reductase activity;GO:0016491//oxidoreductase activity;GO:0016709//oxidoreductase activity, acting on paired donors, with incorporation or reduction of molecular oxygen, NAD(P)H as one donor, and incorporation of one atom of oxygen;GO:0018551//hydrogensulfite reductase activity;GO:0020037//heme binding;GO:0050311//sulfite reductas…	GO:0000103//sulfate assimilation;GO:0006790//sulfur compound metabolic process;GO:0019250//aerobic cobalamin biosynthetic process;GO:0019420//dissimilatory sulfate reduction;GO:0055114//oxidation-reduction process
Mesophyll	SK1G00063185	RZ1C	0.371438	0.469589	23989	15404	0.177	0.221	0.338198308382514	1.29263728635676e-25	4.76052459819466e-21	up	RZ1C	XP_015646836.1 glycine-rich RNA-binding protein RZ1C [Oryza sativa Japonica Group]	Genetic Information Processing	Transcription	ko03040//Spliceosome	K12885	-	GO:0003676//nucleic acid binding;GO:0008270//zinc ion binding	GO:0008380//RNA splicing
Mesophyll	SK1G00052375	SK1G00052375-ABCC4	0.586485	0.721217	23989	15404	0.226	0.273	0.298292641820732	1.51789582294551e-25	5.59010673674374e-21	up	ABCC4	KAF2932969.1 hypothetical protein DAI22_04g042000 [Oryza sativa Japonica Group]	Environmental Information Processing	Membrane transport	ko02010//ABC transporters	K05665	GO:0005575//cellular_component;GO:0005737//cytoplasm;GO:0005887//integral component of plasma membrane;GO:0009380//excinuclease repair complex;GO:0009898//cytoplasmic side of plasma membrane;GO:0016021//integral component of membrane;GO:0043190//ATP-binding cassette (ABC) transporter complex;GO:0055051//ATP-binding cassette (ABC) transporter complex, integrated substrate binding;GO:0055052//ATP-b…	GO:0000166//nucleotide binding;GO:0003674//molecular_function;GO:0003676//nucleic acid binding;GO:0003677//DNA binding;GO:0003924//GTPase activity;GO:0004140//dephospho-CoA kinase activity;GO:0005260//channel-conductance-controlling ATPase activity;GO:0005319//lipid transporter activity;GO:0005524//ATP binding;GO:0005525//GTP binding;GO:0008565//protein transporter activity;GO:0009381//excinuclea…	GO:0000910//cytokinesis;GO:0006289//nucleotide-excision repair;GO:0006810//transport;GO:0006817//phosphate ion transport;GO:0006824//cobalt ion transport;GO:0006855//drug transmembrane transport;GO:0006869//lipid transport;GO:0007601//visual perception;GO:0008150//biological_process;GO:0008272//sulfate transport;GO:0009306//protein secretion;GO:0015675//nickel cation transport;GO:0015689//molybda…
Mesophyll	SK1G00063998	CM-LOX1	1.1625	0.90616	23989	15404	0.263	0.219	-0.359361	1.5315979166013e-25	5.64056880725925e-21	down	CM-LOX1	XP_015650717.1 lipoxygenase 7, chloroplastic [Oryza sativa Japonica Group]	Metabolism;Metabolism;Metabolism;Metabolism	Global and overview maps;Global and overview maps;Lipid metabolism;Lipid metabolism	ko01100//Metabolic pathways;ko01110//Biosynthesis of secondary metabolites;ko00592//alpha-Linolenic acid metabolism;ko00591//Linoleic acid metabolism	K00454;K00454;K00454;K00454	-	GO:0005515//protein binding;GO:0016702//oxidoreductase activity, acting on single donors with incorporation of molecular oxygen, incorporation of two atoms of oxygen;GO:0046872//metal ion binding	GO:0055114//oxidation-reduction process
Mesophyll	SK1G00054622	SRRM2	0.831067	1.027	23989	15404	0.292	0.338	0.305363569990875	1.57895109965973e-25	5.81496110982684e-21	up	SRRM2	KAF2935763.1 hypothetical protein DAI22_04g255500 [Oryza sativa Japonica Group]	-	-	-	-	-	-	-
Mesophyll	SK1G00075254	AtMg00640	0.389994	0.515302	23989	15404	0.149	0.189	0.401875513881825	1.78341669499758e-25	6.56796700433707e-21	up	AtMg00640	YP_003433852.1 possible ATP synthase F0 subunit b [Oryza rufipogon]	-	-	-	-	GO:0000276//mitochondrial proton-transporting ATP synthase complex, coupling factor F(o)	GO:0015078//hydrogen ion transmembrane transporter activity	GO:0015986//ATP synthesis coupled proton transport
Mesophyll	SK1G00046182	SK1G00046182	0.262719	0.36074	23989	15404	0.108	0.144	0.457287568753663	2.29560860674913e-25	8.4542673769357e-21	up	--	EEC75332.1 hypothetical protein OsI_11724 [Oryza sativa Indica Group]	-	-	-	-	-	-	GO:0030163//protein catabolic process
Mesophyll	SK1G00057680	PER3	0.764975	0.602177	23989	15404	0.269	0.23	-0.345173	2.31522451768779e-25	8.52650885374058e-21	down	PER3	XP_015641122.1 peroxidase 3 [Oryza sativa Japonica Group]	Metabolism;Metabolism;Metabolism	Global and overview maps;Global and overview maps;Biosynthesis of other secondary metabolites	ko01100//Metabolic pathways;ko01110//Biosynthesis of secondary metabolites;ko00940//Phenylpropanoid biosynthesis	K00430;K00430;K00430	-	GO:0004601//peroxidase activity;GO:0020037//heme binding	GO:0006979//response to oxidative stress;GO:0055114//oxidation-reduction process
Mesophyll	SK1G00060442	SK1G00060442-VDAC2	0.247432	0.344434	23989	15404	0.102	0.137	0.477030492406768	3.08796636986369e-25	1.1372362546934e-20	up	VDAC2	XP_015639259.1 mitochondrial outer membrane protein porin 2 [Oryza sativa Japonica Group]	-	-	-	-	GO:0005741//mitochondrial outer membrane;GO:0009523//photosystem II;GO:0009654//photosystem II oxygen evolving complex;GO:0019898//extrinsic component of membrane	GO:0005509//calcium ion binding	GO:0015979//photosynthesis;GO:0055085//transmembrane transport
Mesophyll	SK1G00043500	AT7	1.77487	1.44889	23989	15404	0.404	0.375	-0.29275	3.24139361776993e-25	1.19374044155231e-20	down	AT7	EAY72776.1 hypothetical protein OsI_00639 [Oryza sativa Indica Group]	-	-	-	-	-	GO:0016747//transferase activity, transferring acyl groups other than amino-acyl groups	-
Mesophyll	SK1G00046762	SK1G00046762	0.611968	0.775794	23989	15404	0.234	0.279	0.342168557774989	3.3506974294301e-25	1.23399484931052e-20	up	--	EEC75040.1 hypothetical protein OsI_11139 [Oryza sativa Indica Group]	-	-	-	-	GO:0019013//viral nucleocapsid	-	-
Mesophyll	SK1G00063884	SK1G00063884-FKBP70	0.380261	0.484047	23989	15404	0.161	0.203	0.348073966853673	3.75923923988863e-25	1.38445262726618e-20	up	FKBP70	EEC83911.1 hypothetical protein OsI_29964 [Oryza sativa Indica Group]	-	-	-	-	GO:0005854//nascent polypeptide-associated complex	GO:0003755//peptidyl-prolyl cis-trans isomerase activity;GO:0005515//protein binding;GO:0051082//unfolded protein binding	GO:0051083//'de novo' cotranslational protein folding
Mesophyll	SK1G00049294	LAF1	2.39866	1.99399	23989	15404	0.476	0.431	-0.266559	4.31791088415628e-25	1.59020022041708e-20	down	LAF1	EAY86852.1 hypothetical protein OsI_08236 [Oryza sativa Indica Group]	-	-	-	-	-	-	-
Mesophyll	SK1G00068343	RPS16A	0.196787	0.265773	23989	15404	0.1	0.135	0.43336992071515	5.80116748551971e-25	2.1364539615672e-20	up	RPS16A	XP_015617880.1 40S ribosomal protein S16-like [Oryza sativa Japonica Group]	Genetic Information Processing	Translation	ko03010//Ribosome	K02960	GO:0005840//ribosome;GO:0022627//cytosolic small ribosomal subunit	GO:0003735//structural constituent of ribosome	GO:0006412//translation
Mesophyll	SK1G00040922	GDCSP	0.407557	0.529025	23989	15404	0.159	0.201	0.376253499717959	6.20021422649586e-25	2.28341489533389e-20	up	GDCSP	EAY75571.1 hypothetical protein OsI_03474 [Oryza sativa Indica Group]	Metabolism;Metabolism;Metabolism;Metabolism;Metabolism	Global and overview maps;Global and overview maps;Global and overview maps;Carbohydrate metabolism;Amino acid metabolism	ko01100//Metabolic pathways;ko01110//Biosynthesis of secondary metabolites;ko01200//Carbon metabolism;ko00630//Glyoxylate and dicarboxylate metabolism;ko00260//Glycine, serine and threonine metabolism	K00281;K00281;K00281;K00281;K00281	-	GO:0004375//glycine dehydrogenase (decarboxylating) activity;GO:0004837//tyrosine decarboxylase activity;GO:0016829//lyase activity;GO:0018826//methionine gamma-lyase activity;GO:0031071//cysteine desulfurase activity	GO:0006520//cellular amino acid metabolic process;GO:0006546//glycine catabolic process;GO:0009087//methionine catabolic process;GO:0009093//cysteine catabolic process;GO:0016226//iron-sulfur cluster assembly;GO:0019464//glycine decarboxylation via glycine cleavage system;GO:0051188//cofactor biosynthetic process;GO:0055114//oxidation-reduction process
Mesophyll	SK1G00071378	DRB6	0.356602	0.461118	23989	15404	0.163	0.204	0.370730040867867	6.49286740613353e-25	2.39119320833086e-20	up	DRB6	XP_015614779.1 double-stranded RNA-binding protein 6 isoform X1 [Oryza sativa Japonica Group]	-	-	-	-	-	GO:0004525//ribonuclease III activity	GO:0006396//RNA processing
Mesophyll	SK1G00065333	SK1G00065333	0.253739	0.334044	23989	15404	0.121	0.158	0.396557627821067	6.65065889261386e-25	2.44930465697183e-20	up	--	KAB8107958.1 hypothetical protein EE612_043143 [Oryza sativa]	-	-	-	-	-	GO:0018492//carbon-monoxide dehydrogenase (acceptor) activity	GO:0006085//acetyl-CoA biosynthetic process
Mesophyll	SK1G00053253	S1FA2	0.309917	0.404643	23989	15404	0.148	0.188	0.384656882415629	6.70610751515164e-25	2.46972527568004e-20	up	S1FA2	XP_015633609.1 DNA-binding protein S1FA2 [Oryza sativa Japonica Group]	-	-	-	-	GO:0005634//nucleus	GO:0003677//DNA binding	GO:0006355//regulation of transcription, DNA-templated
Mesophyll	SK1G00057199	SK1G00057199	1.96494	1.55228	23989	15404	0.348	0.317	-0.340078	7.65272392140877e-25	2.81834516577642e-20	down	--	EEE65945.1 hypothetical protein OsJ_21822 [Oryza sativa Japonica Group]	-	-	-	-	-	-	-
Mesophyll	SK1G00060312	SK1G00060312-At1g04770	0.446447	0.33794	23989	15404	0.18	0.143	-0.401619	8.03021423007925e-25	2.95736729665359e-20	down	At1g04770	XP_015637899.1 protein SULFUR DEFICIENCY-INDUCED 2 [Oryza sativa Japonica Group]	-	-	-	-	-	GO:0005515//protein binding	-
Mesophyll	SK1G00065953	SK1G00065953-Os08g0117300	0.344484	0.441506	23989	15404	0.159	0.2	0.357904645711448	1.253834471415e-24	4.61762159132717e-20	up	Os08g0117300	XP_015649875.1 40S ribosomal protein S13-2 [Oryza sativa Japonica Group]	Genetic Information Processing	Translation	ko03010//Ribosome	K02953	GO:0000314//organellar small ribosomal subunit;GO:0005840//ribosome;GO:0022627//cytosolic small ribosomal subunit	GO:0003735//structural constituent of ribosome	GO:0006412//translation
Mesophyll	SK1G00060501	SK1G00060501-SFH8	0.930441	1.11798	23989	15404	0.356	0.396	0.264882573147737	1.34499055028473e-24	4.95333119858861e-20	up	SFH8	XP_015640193.2 phosphatidylinositol/phosphatidylcholine transfer protein SFH8 [Oryza sativa Japonica Group]	-	-	-	-	-	GO:0003677//DNA binding	-
Mesophyll	SK1G00050535	SK1G00050535	0.539026	0.672334	23989	15404	0.219	0.265	0.318770999046398	1.35225030405607e-24	4.98006741977771e-20	up	--	EEE56819.1 hypothetical protein OsJ_06416 [Oryza sativa Japonica Group]	-	-	-	-	-	-	-
Mesophyll	SK1G00063854	SK1G00063854-RPL17	0.535838	0.660169	23989	15404	0.231	0.278	0.300988375314586	1.4930922901319e-24	5.49876028609777e-20	up	RPL17	EEC83931.1 hypothetical protein OsI_30009 [Oryza sativa Indica Group]	Genetic Information Processing	Translation	ko03010//Ribosome	K02880	GO:0000311//plastid large ribosomal subunit;GO:0005840//ribosome;GO:0022625//cytosolic large ribosomal subunit	GO:0003735//structural constituent of ribosome	GO:0006412//translation
Mesophyll	SK1G00075152	SK1G00075152-petA	0.6437	0.778715	23989	15404	0.247	0.294	0.274669404706839	1.86240348894325e-24	6.85885956908021e-20	up	petA	AAS46130.1 cytochrome f [Oryza sativa Japonica Group]	Metabolism;Metabolism	Global and overview maps;Energy metabolism	ko01100//Metabolic pathways;ko00195//Photosynthesis	K02634;K02634	GO:0031361//integral component of thylakoid membrane	GO:0005506//iron ion binding;GO:0009055//electron carrier activity;GO:0020037//heme binding	GO:0015979//photosynthesis
Mesophyll	SK1G00042028	At2g44860	0.173213	0.23188	23989	15404	0.09	0.122	0.420620048417617	2.58370935453405e-24	9.51528481087801e-20	up	At2g44860	XP_015622111.1 probable ribosome biogenesis protein RLP24 [Oryza sativa Japonica Group]	Genetic Information Processing	Translation	ko03010//Ribosome	K02896	-	GO:0008201//heparin binding;GO:0008270//zinc ion binding	-
Mesophyll	SK1G00053214	CNX1	1.7458	1.38474	23989	15404	0.364	0.333	-0.334253	3.02021511189861e-24	1.11228482141002e-19	down	CNX1	EAY93972.1 hypothetical protein OsI_15749 [Oryza sativa Indica Group]	Genetic Information Processing;Cellular Processes	Folding, sorting and degradation;Transport and catabolism	ko04141//Protein processing in endoplasmic reticulum;ko04145//Phagosome	K08054;K08054	GO:0005783//endoplasmic reticulum;GO:0016020//membrane	GO:0005509//calcium ion binding;GO:0008948//oxaloacetate decarboxylase activity;GO:0015081//sodium ion transmembrane transporter activity;GO:0051082//unfolded protein binding	GO:0006457//protein folding;GO:0036376//sodium ion export from cell
Mesophyll	SK1G00070934	SK1G00070934	0.913588	0.750075	23989	15404	0.336	0.295	-0.284475	3.88292505899632e-24	1.43000364072716e-19	down	--	XP_015614088.1 fluoride export protein 2 [Oryza sativa Japonica Group]	-	-	-	-	GO:0016021//integral component of membrane	-	-
Mesophyll	SK1G00054411	SK1G00054411-DTX49	0.60883	0.482234	23989	15404	0.252	0.21	-0.336243	4.43456097805708e-24	1.63316011699886e-19	down	DTX49	CAH67053.1 OSIGBa0127A14.5 [Oryza sativa]	-	-	-	-	GO:0016020//membrane	GO:0015238//drug transmembrane transporter activity;GO:0015297//antiporter activity;GO:0042910//xenobiotic transporter activity	GO:0006855//drug transmembrane transport;GO:0042493//response to drug;GO:0055085//transmembrane transport
Mesophyll	SK1G00054740	SK1G00054740-RBP45	0.200187	0.264603	23989	15404	0.099	0.132	0.402308181454614	4.51995965651911e-24	1.66461074230286e-19	up	RBP45	EAY95645.1 hypothetical protein OsI_17510 [Oryza sativa Indica Group]	-	-	-	-	-	GO:0003676//nucleic acid binding;GO:0003723//RNA binding	GO:0008380//RNA splicing
Mesophyll	SK1G00063573	SCC2	0.159332	0.235225	23989	15404	0.073	0.103	0.561717766102039	4.89120533492463e-24	1.80133310074604e-19	up	SCC2	XP_015647184.1 sister chromatid cohesion protein SCC2 isoform X1 [Oryza sativa Japonica Group]	-	-	-	-	GO:0030117//membrane coat	GO:0005515//protein binding	GO:0006886//intracellular protein transport;GO:0016192//vesicle-mediated transport
Mesophyll	SK1G00074845	CFIS2	0.341569	0.4439	23989	15404	0.158	0.198	0.377962180660767	5.29892050189003e-24	1.95148644243606e-19	up	CFIS2	NP_001141685.1 uncharacterized protein LOC100273812 [Zea mays]	Genetic Information Processing	Translation	ko03015//mRNA surveillance pathway	K14397	GO:0005849//mRNA cleavage factor complex	GO:0003729//mRNA binding;GO:0016787//hydrolase activity	GO:0006378//mRNA polyadenylation
Mesophyll	SK1G00058101	SK1G00058101-VATP-P1	0.529962	0.640602	23989	15404	0.232	0.278	0.273491854532386	6.8085796782477e-24	2.50746372390506e-19	up	VATP-P1	XP_015637557.1 V-type proton ATPase 16 kDa proteolipid subunit [Oryza sativa Japonica Group]	Metabolism;Metabolism;Cellular Processes	Global and overview maps;Energy metabolism;Transport and catabolism	ko01100//Metabolic pathways;ko00190//Oxidative phosphorylation;ko04145//Phagosome	K02155;K02155;K02155	GO:0016471//vacuolar proton-transporting V-type ATPase complex;GO:0033177//proton-transporting two-sector ATPase complex, proton-transporting domain	GO:0008553//hydrogen-exporting ATPase activity, phosphorylative mechanism;GO:0015078//hydrogen ion transmembrane transporter activity	GO:0015991//ATP hydrolysis coupled proton transport;GO:1902600//hydrogen ion transmembrane transport
Mesophyll	SK1G00041418	CYP72A11	1.20126	0.988639	23989	15404	0.373	0.337	-0.281012	7.61762948880981e-24	2.80542058813888e-19	down	CYP72A11	XP_025815404.1 uncharacterized protein LOC112892460 [Panicum hallii]	-	-	-	-	-	GO:0005506//iron ion binding;GO:0016705//oxidoreductase activity, acting on paired donors, with incorporation or reduction of molecular oxygen;GO:0020037//heme binding	GO:0055114//oxidation-reduction process
Mesophyll	SK1G00042264	Os01g0367900	0.210672	0.289602	23989	15404	0.095	0.128	0.458885884413561	8.0958401575652e-24	2.98153601322811e-19	up	Os01g0367900	XP_015621490.1 probable chromatin-remodeling complex ATPase chain [Oryza sativa Japonica Group]	-	-	-	-	GO:0005634//nucleus;GO:0070823//HDA1 complex	GO:0003676//nucleic acid binding;GO:0003677//DNA binding;GO:0003723//RNA binding;GO:0004521//endoribonuclease activity;GO:0005524//ATP binding;GO:0016787//hydrolase activity;GO:0016818//hydrolase activity, acting on acid anhydrides, in phosphorus-containing anhydrides;GO:0031491//nucleosome binding	GO:0006338//chromatin remodeling;GO:0016575//histone deacetylation;GO:0043044//ATP-dependent chromatin remodeling
Mesophyll	SK1G00061034	SK1G00061034	0.333242	0.434878	23989	15404	0.152	0.192	0.383939435912408	8.78218092357063e-24	3.23430159053259e-19	up	--	XP_015645097.1 nucleolar protein 58 isoform X1 [Oryza sativa Japonica Group]	-	-	-	-	-	-	-
Mesophyll	SK1G00061361	SK1G00061361-At2g23930	0.310669	0.398746	23989	15404	0.139	0.178	0.359992054509276	1.02752980399855e-23	3.78418676216586e-19	up	At2g23930	XP_015647578.1 probable small nuclear ribonucleoprotein G [Oryza sativa Japonica Group]	Genetic Information Processing	Transcription	ko03040//Spliceosome	K11099	-	-	-
Mesophyll	SK1G00043377	PDC1	0.422127	0.320801	23989	15404	0.185	0.15	-0.395891	1.26333142186326e-23	4.652596960438e-19	down	PDC1	EAY72634.1 hypothetical protein OsI_00500 [Oryza sativa Indica Group]	Metabolism;Metabolism;Metabolism	Global and overview maps;Global and overview maps;Carbohydrate metabolism	ko01100//Metabolic pathways;ko01110//Biosynthesis of secondary metabolites;ko00010//Glycolysis / Gluconeogenesis	K01568;K01568;K01568	GO:0005948//acetolactate synthase complex	GO:0000287//magnesium ion binding;GO:0003824//catalytic activity;GO:0003984//acetolactate synthase activity;GO:0008949//oxalyl-CoA decarboxylase activity;GO:0009028//tartronate-semialdehyde synthase activity;GO:0016823//hydrolase activity, acting on acid carbon-carbon bonds, in ketonic substances;GO:0030976//thiamine pyrophosphate binding;GO:0033980//phosphonopyruvate decarboxylase activity;GO:00…	GO:0006113//fermentation;GO:0009097//isoleucine biosynthetic process;GO:0009099//valine biosynthetic process;GO:0009444//pyruvate oxidation;GO:0009636//response to toxic substance;GO:0009684//indoleacetic acid biosynthetic process;GO:0017000//antibiotic biosynthetic process;GO:0019310//inositol catabolic process;GO:0019385//methanogenesis, from acetate;GO:0019529//taurine catabolic process;GO:003…
Mesophyll	SK1G00053880	SK1G00053880-RPL23A	0.712067	0.864244	23989	15404	0.276	0.324	0.279390001552651	1.44280169340461e-23	5.31355007647051e-19	up	RPL23A	EAY94740.1 hypothetical protein OsI_16517 [Oryza sativa Indica Group]	Genetic Information Processing	Translation	ko03010//Ribosome	K02893	GO:0005840//ribosome;GO:0022625//cytosolic large ribosomal subunit	GO:0003735//structural constituent of ribosome	GO:0006412//translation
Mesophyll	SK1G00055822	SK1G00055822-CSI1	0.346935	0.446577	23989	15404	0.158	0.198	0.364151028500441	1.52914809836211e-23	5.63154661664797e-19	up	CSI1	XP_015643045.1 protein CELLULOSE SYNTHASE INTERACTIVE 1 [Oryza sativa Japonica Group]	-	-	-	-	GO:0000221//vacuolar proton-transporting V-type ATPase, V1 domain	GO:0005515//protein binding;GO:0046961//proton-transporting ATPase activity, rotational mechanism	GO:1902600//hydrogen ion transmembrane transport
Mesophyll	SK1G00064237	SK1G00064237-ACA7	0.622544	0.861065	23989	15404	0.148	0.183	0.467881764376168	1.78871891368758e-23	6.58749401532861e-19	up	ACA7	XP_015648465.1 alpha carbonic anhydrase 7 [Oryza sativa Japonica Group]	Metabolism;Metabolism	Global and overview maps;Energy metabolism	ko01100//Metabolic pathways;ko00910//Nitrogen metabolism	K01674;K01674	-	-	-
Mesophyll	SK1G00048812	SK1G00048812-At5g10770	1.42444	1.17888	23989	15404	0.376	0.352	-0.27296	1.82413254281669e-23	6.71791532868529e-19	down	At5g10770	EAY87323.1 hypothetical protein OsI_08727 [Oryza sativa Indica Group]	-	-	-	-	-	-	-
Mesophyll	SK1G00058049	ADF7	0.290382	0.420797	23989	15404	0.113	0.145	0.535016875214822	2.11241036114514e-23	7.77958487802532e-19	up	ADF7	XP_015639583.1 actin-depolymerizing factor 7 [Oryza sativa Japonica Group]	-	-	-	-	-	GO:0003779//actin binding	-
Mesophyll	SK1G00075143	ndhH	20.7389	24.9136	23989	15404	0.729	0.759	0.264590338879198	2.15183199663192e-23	7.92476687719604e-19	up	ndhH	NP_039450.1 NADH dehydrogenase subunit 7 [Oryza sativa Japonica Group]	Metabolism;Metabolism	Global and overview maps;Energy metabolism	ko01100//Metabolic pathways;ko00190//Oxidative phosphorylation	K05579;K05579	-	GO:0016151//nickel cation binding;GO:0016651//oxidoreductase activity, acting on NAD(P)H;GO:0048038//quinone binding;GO:0050136//NADH dehydrogenase (quinone) activity;GO:0051287//NAD binding	GO:0055114//oxidation-reduction process
Mesophyll	SK1G00069019	WNK9	0.452023	0.579337	23989	15404	0.175	0.216	0.357936648250174	2.56165095400454e-23	9.43404813340792e-19	up	WNK9	XP_015620490.1 probable serine/threonine-protein kinase WNK9 [Oryza sativa Japonica Group]	-	-	-	-	-	GO:0004672//protein kinase activity;GO:0004674//protein serine/threonine kinase activity;GO:0005524//ATP binding	GO:0006468//protein phosphorylation
Mesophyll	SK1G00067842	SK1G00067842	0.205629	0.292448	23989	15404	0.094	0.126	0.507932082049053	2.66604027636123e-23	9.81849312978315e-19	up	--	-	-	-	-	-	-	-	-
Mesophyll	SK1G00056633	SK1G00056633-ACX4	0.33427	0.42906	23989	15404	0.154	0.193	0.36007011543352	2.87843167947503e-23	1.06006881891706e-18	up	ACX4	KAF2926688.1 hypothetical protein DAI22_06g147300 [Oryza sativa Japonica Group]	Metabolism;Metabolism;Metabolism;Cellular Processes;Metabolism;Metabolism;Metabolism;Metabolism;Metabolism;Metabolism	Global and overview maps;Global and overview maps;Global and overview maps;Transport and catabolism;Global and overview maps;Lipid metabolism;Lipid metabolism;Metabolism of other amino acids;Lipid metabolism;Carbohydrate metabolism	ko01100//Metabolic pathways;ko01110//Biosynthesis of secondary metabolites;ko01200//Carbon metabolism;ko04146//Peroxisome;ko01212//Fatty acid metabolism;ko00592//alpha-Linolenic acid metabolism;ko00071//Fatty acid degradation;ko00410//beta-Alanine metabolism;ko01040//Biosynthesis of unsaturated fatty acids;ko00640//Propanoate metabolism	K00232;K00232;K00232;K00232;K00232;K00232;K00232;K00232;K00232;K00232	-	GO:0016627//oxidoreductase activity, acting on the CH-CH group of donors	GO:0055114//oxidation-reduction process
Mesophyll	SK1G00040396	SDH6	0.369036	0.28372	23989	15404	0.172	0.136	-0.379179	3.82714906417142e-23	1.40946245735305e-18	down	SDH6	EEC75305.1 hypothetical protein OsI_11670 [Oryza sativa Indica Group]	-	-	-	-	-	-	-
Mesophyll	SK1G00060858	SK1G00060858-HDT2	0.333363	0.433018	23989	15404	0.141	0.179	0.377231681395958	5.66984175296478e-23	2.08808932078187e-18	up	HDT2	EEC79812.1 hypothetical protein OsI_21251 [Oryza sativa Indica Group]	-	-	-	-	GO:0032040//small-subunit processome	-	-
Mesophyll	SK1G00044713	IAA13	0.374152	0.277992	23989	15404	0.162	0.13	-0.428449	6.84922832223204e-23	2.52243380651162e-18	down	IAA13	XP_015631444.1 auxin-responsive protein IAA13 [Oryza sativa Japonica Group]	Environmental Information Processing	Signal transduction	ko04075//Plant hormone signal transduction	K14484	GO:0005737//cytoplasm	GO:0003677//DNA binding	GO:0008150//biological_process
Mesophyll	SK1G00051412	ARF6	0.465733	0.594494	23989	15404	0.191	0.231	0.352092427476861	7.38056086048436e-23	2.71811295369918e-18	up	ARF6	XP_015625706.1 auxin response factor 6 [Oryza sativa Japonica Group]	-	-	-	-	GO:0005634//nucleus	GO:0003677//DNA binding	GO:0006355//regulation of transcription, DNA-templated;GO:0009725//response to hormone
Mesophyll	SK1G00060832	SPAC56F8.03	0.37181	0.484274	23989	15404	0.159	0.197	0.381168580247231	9.51439194124631e-23	3.50396026412219e-18	up	SPAC56F8.03	EAY99255.1 hypothetical protein OsI_21217 [Oryza sativa Indica Group]	Genetic Information Processing	Translation	ko03013//RNA transport	K03243	GO:0005737//cytoplasm	GO:0003743//translation initiation factor activity;GO:0003746//translation elongation factor activity;GO:0003747//translation release factor activity;GO:0003924//GTPase activity;GO:0004781//sulfate adenylyltransferase (ATP) activity;GO:0005525//GTP binding;GO:0043022//ribosome binding	GO:0000103//sulfate assimilation;GO:0001514//selenocysteine incorporation;GO:0006412//translation;GO:0006413//translational initiation;GO:0006414//translational elongation;GO:0006415//translational termination;GO:0006950//response to stress;GO:0042254//ribosome biogenesis
Mesophyll	SK1G00053998	SK1G00053998-ERG3	0.267131	0.359653	23989	15404	0.12	0.154	0.428918978897712	1.20254065436838e-22	4.42871672190787e-18	up	ERG3	XP_015637255.1 elicitor-responsive protein 3 [Oryza sativa Japonica Group]	-	-	-	-	-	-	-
Mesophyll	SK1G00058556	SK1G00058556-UXT3	0.299031	0.384405	23989	15404	0.139	0.176	0.362225238660452	1.26294874274948e-22	4.65118762979777e-18	up	UXT3	XP_015640428.1 UDP-xylose transporter 3 isoform X1 [Oryza sativa Japonica Group]	-	-	-	-	GO:0016020//membrane;GO:0016021//integral component of membrane	GO:0022857//transmembrane transporter activity	GO:0055085//transmembrane transport
Mesophyll	SK1G00041051	MBR2	0.143956	0.20142	23989	15404	0.072	0.101	0.484294946961436	1.42099851196064e-22	5.23325331984863e-18	up	MBR2	XP_015613217.1 E3 ubiquitin-protein ligase arkadia [Oryza sativa Japonica Group]	-	-	-	-	GO:0000109//nucleotide-excision repair complex;GO:0005680//anaphase-promoting complex	GO:0004017//adenylate kinase activity;GO:0008270//zinc ion binding;GO:0046872//metal ion binding;GO:0061630//ubiquitin protein ligase activity;GO:0097602//cullin family protein binding	GO:0006289//nucleotide-excision repair;GO:0031145//anaphase-promoting complex-dependent proteasomal ubiquitin-dependent protein catabolic process
Mesophyll	SK1G00059663	ATG18H	0.187823	0.250838	23989	15404	0.092	0.124	0.417192124358117	1.63101593418804e-22	6.0067054824277e-18	up	ATG18H	EEC79207.1 hypothetical protein OsI_19924 [Oryza sativa Indica Group]	-	-	-	-	-	GO:0004332//fructose-bisphosphate aldolase activity;GO:0005515//protein binding	GO:0006096//glycolytic process
Mesophyll	SK1G00064466	SDF2	0.835703	0.6703	23989	15404	0.273	0.246	-0.318141	1.65526437478741e-22	6.09600763946707e-18	down	SDF2	XP_015648496.1 stromal cell-derived factor 2-like protein [Oryza sativa Japonica Group]	-	-	-	-	GO:0005789//endoplasmic reticulum membrane	-	-
Mesophyll	SK1G00042693	GAMMACA1	0.334113	0.423743	23989	15404	0.161	0.2	0.34276460733135	2.15979087451294e-22	7.95407783265625e-18	up	GAMMACA1	EEC70424.1 hypothetical protein OsI_01428 [Oryza sativa Indica Group]	-	-	-	-	GO:0005737//cytoplasm	GO:0003977//UDP-N-acetylglucosamine diphosphorylase activity;GO:0008666//2,3,4,5-tetrahydropyridine-2,6-dicarboxylate N-succinyltransferase activity;GO:0008780//acyl-[acyl-carrier-protein]-UDP-N-acetylglucosamine O-acyltransferase activity;GO:0008878//glucose-1-phosphate adenylyltransferase activity;GO:0009001//serine O-acetyltransferase activity;GO:0016410//N-acyltransferase activity;GO:0019134/…	GO:0005978//glycogen biosynthetic process;GO:0006535//cysteine biosynthetic process from serine;GO:0009089//lysine biosynthetic process via diaminopimelate;GO:0009103//lipopolysaccharide biosynthetic process;GO:0009245//lipid A biosynthetic process;GO:0009252//peptidoglycan biosynthetic process;GO:0010124//phenylacetate catabolic process
Mesophyll	SK1G00062307	PIP2-1	2.26059	1.85257	23989	15404	0.389	0.347	-0.287156	2.64926480038698e-22	9.75671240686518e-18	down	PIP2-1	XP_015646828.1 probable aquaporin PIP2-1 [Oryza sativa Japonica Group]	-	-	-	-	GO:0016020//membrane	GO:0003941//L-serine ammonia-lyase activity;GO:0015267//channel activity;GO:0051539//4 iron, 4 sulfur cluster binding	GO:0009063//cellular amino acid catabolic process;GO:0055085//transmembrane transport
Mesophyll	SK1G00060567	SK1G00060567	0.193693	0.261834	23989	15404	0.084	0.115	0.434685698716844	2.68508610931277e-22	9.88863512337706e-18	up	--	EEC79675.1 hypothetical protein OsI_20936 [Oryza sativa Indica Group]	-	-	-	-	-	-	GO:0043248//proteasome assembly
Mesophyll	SK1G00057827	SK1G00057827-NRPB8B	0.377167	0.461101	23989	15404	0.166	0.206	0.289812038457335	2.84035688733826e-22	1.04604663446894e-17	up	NRPB8B	KAF0894557.1 hypothetical protein E2562_001859 [Oryza meyeriana var. granulata] [Oryza meyeriana]	Genetic Information Processing	Transcription	ko03020//RNA polymerase	K03016	-	-	GO:0006351//transcription, DNA-templated
Mesophyll	SK1G00051612	SK1G00051612	0.508757	0.618681	23989	15404	0.234	0.278	0.282170724380215	2.87661539484745e-22	1.05939991761442e-17	up	--	XP_015626133.1 eukaryotic translation initiation factor 3 subunit J [Oryza sativa Japonica Group]	Genetic Information Processing	Translation	ko03013//RNA transport	K03245	GO:0005737//cytoplasm;GO:0005852//eukaryotic translation initiation factor 3 complex	GO:0003743//translation initiation factor activity	-
Mesophyll	SK1G00039858	GUX1	0.404738	0.52428	23989	15404	0.16	0.198	0.373267655173188	2.90024448612657e-22	1.06810203935069e-17	up	GUX1	EEC71899.1 hypothetical protein OsI_04661 [Oryza sativa Indica Group]	-	-	-	-	-	GO:0016757//transferase activity, transferring glycosyl groups	-
Mesophyll	SK1G00072182	SK1G00072182	0.318199	0.396265	23989	15404	0.146	0.184	0.316445752988787	2.97257244855322e-22	1.09473898135318e-17	up	--	EAY78430.1 hypothetical protein OsI_33521 [Oryza sativa Indica Group]	-	-	-	-	-	-	-
Mesophyll	SK1G00057169	UTR3	0.741549	0.524454	23989	15404	0.169	0.136	-0.499645	3.69717035755587e-22	1.36159389928068e-17	down	UTR3	XP_015644531.1 UDP-galactose/UDP-glucose transporter 3 [Oryza sativa Japonica Group]	-	-	-	-	GO:0016020//membrane;GO:0016021//integral component of membrane	-	GO:0055085//transmembrane transport
Mesophyll	SK1G00069172	SK1G00069172-GSTZ1	0.248826	0.339488	23989	15404	0.113	0.146	0.448069735281028	3.72529713462023e-22	1.37195242873794e-17	up	GSTZ1	EAY82587.1 hypothetical protein OsI_37809 [Oryza sativa Indica Group]	Metabolism;Metabolism	Global and overview maps;Amino acid metabolism	ko01100//Metabolic pathways;ko00350//Tyrosine metabolism	K01800;K01800	-	GO:0005515//protein binding;GO:0016034//maleylacetoacetate isomerase activity	GO:0006559//L-phenylalanine catabolic process;GO:0006572//tyrosine catabolic process;GO:0006749//glutathione metabolic process
Mesophyll	SK1G00043050	SK1G00043050-At3g47110	0.221731	0.158471	23989	15404	0.106	0.077	-0.484332	3.90949740783143e-22	1.43978970535616e-17	down	At3g47110	BAF04389.2 Os01g0228200 [Oryza sativa Japonica Group]	-	-	-	-	-	GO:0004672//protein kinase activity;GO:0005515//protein binding;GO:0005524//ATP binding;GO:0016709//oxidoreductase activity, acting on paired donors, with incorporation or reduction of molecular oxygen, NAD(P)H as one donor, and incorporation of one atom of oxygen	GO:0006468//protein phosphorylation;GO:0006744//ubiquinone biosynthetic process
Mesophyll	SK1G00046477	SK1G00046477	0.490961	0.58938	23989	15404	0.22	0.264	0.263542488645923	4.91479033209628e-22	1.81001898350442e-17	up	--	XP_015631705.1 uncharacterized protein LOC4332711 [Oryza sativa Japonica Group]	-	-	-	-	-	GO:0008270//zinc ion binding;GO:0046872//metal ion binding	-
Mesophyll	SK1G00070692	At1g18900	0.54843	0.446897	23989	15404	0.247	0.206	-0.295305	6.04380093925478e-22	2.22581100990875e-17	down	At1g18900	XP_015620082.1 pentatricopeptide repeat-containing protein At1g74750 [Oryza sativa Japonica Group]	-	-	-	-	GO:0005739//mitochondrion	GO:0004540//ribonuclease activity	-
Mesophyll	SK1G00047294	RPS10	0.183481	0.24711	23989	15404	0.088	0.119	0.429316170347476	8.43716922350653e-22	3.10724068163299e-17	up	RPS10	RLN19930.1 30S ribosomal protein S10, chloroplastic [Panicum miliaceum]	Genetic Information Processing	Translation	ko03010//Ribosome	K02946	GO:0000314//organellar small ribosomal subunit;GO:0022627//cytosolic small ribosomal subunit	GO:0003735//structural constituent of ribosome;GO:0003824//catalytic activity;GO:0008236//serine-type peptidase activity;GO:0016787//hydrolase activity;GO:0047570//3-oxoadipate enol-lactonase activity	GO:0006412//translation;GO:0006508//proteolysis;GO:0009102//biotin biosynthetic process;GO:0042952//beta-ketoadipate pathway
Mesophyll	SK1G00047093	snu13	0.75192	0.903644	23989	15404	0.256	0.301	0.265143475852512	8.45486119775217e-22	3.11375628190817e-17	up	snu13	XP_006649713.1 PREDICTED: NHP2-like protein 1 [Oryza brachyantha]	Genetic Information Processing;Genetic Information Processing	Transcription;Translation	ko03040//Spliceosome;ko03008//Ribosome biogenesis in eukaryotes	K12845;K12845	-	-	-
Mesophyll	SK1G00061476	SK1G00061476-At1g74360	0.418903	0.328069	23989	15404	0.198	0.163	-0.352522	8.52114147216932e-22	3.13816598137052e-17	down	At1g74360	KAF2923738.1 hypothetical protein DAI22_07g216500 [Oryza sativa Japonica Group]	-	-	-	-	-	GO:0004672//protein kinase activity;GO:0005515//protein binding;GO:0005524//ATP binding;GO:0016709//oxidoreductase activity, acting on paired donors, with incorporation or reduction of molecular oxygen, NAD(P)H as one donor, and incorporation of one atom of oxygen	GO:0006468//protein phosphorylation;GO:0006744//ubiquinone biosynthetic process
Mesophyll	SK1G00048124	BET11	0.426869	0.343789	23989	15404	0.198	0.159	-0.312188	8.58483958908983e-22	3.16162472387e-17	down	BET11	XP_015626198.1 bet1-like SNARE 1-1 isoform X1 [Oryza sativa Japonica Group]	Genetic Information Processing	Folding, sorting and degradation	ko04130//SNARE interactions in vesicular transport	K08504	-	GO:0016779//nucleotidyltransferase activity	-
Mesophyll	SK1G00041438	Os01g0624000	0.202317	0.274867	23989	15404	0.093	0.125	0.441931233563582	9.60575820264495e-22	3.53760863087008e-17	up	Os01g0624000	EEE55011.1 hypothetical protein OsJ_02661 [Oryza sativa Japonica Group]	Metabolism;Metabolism	Global and overview maps;Lipid metabolism	ko01100//Metabolic pathways;ko00600//Sphingolipid metabolism	K12349;K12349	-	-	-
Mesophyll	SK1G00045149	SK1G00045149	3.12757	2.60485	23989	15404	0.438	0.408	-0.263832	9.94386214549646e-22	3.66212555094344e-17	down	--	BAH92308.1 Os03g0673100 [Oryza sativa Japonica Group]	-	-	-	-	-	-	-
Mesophyll	SK1G00057142	SK1G00057142-KCS11	0.791946	0.649665	23989	15404	0.302	0.264	-0.285667	1.01343655490314e-21	3.73228414439728e-17	down	KCS11	EAZ01557.1 hypothetical protein OsI_23590 [Oryza sativa Indica Group]	Metabolism;Metabolism;Organismal Systems;Metabolism	Global and overview maps;Global and overview maps;Environmental adaptation;Lipid metabolism	ko01100//Metabolic pathways;ko01110//Biosynthesis of secondary metabolites;ko04626//Plant-pathogen interaction;ko00062//Fatty acid elongation	K15397;K15397;K15397;K15397	GO:0016020//membrane	GO:0003985//acetyl-CoA C-acetyltransferase activity;GO:0004315//3-oxoacyl-[acyl-carrier-protein] synthase activity;GO:0016747//transferase activity, transferring acyl groups other than amino-acyl groups	GO:0006631//fatty acid metabolic process;GO:0006633//fatty acid biosynthetic process
Mesophyll	SK1G00058287	SK1G00058287-CUL1	0.322745	0.402021	23989	15404	0.155	0.194	0.316790912009349	1.08616934473095e-21	4.00014446277513e-17	up	CUL1	XP_015639865.1 cullin-1 isoform X1 [Oryza sativa Japonica Group]	Genetic Information Processing;Genetic Information Processing	Folding, sorting and degradation;Folding, sorting and degradation	ko04141//Protein processing in endoplasmic reticulum;ko04120//Ubiquitin mediated proteolysis	K03347;K03347	-	GO:0031625//ubiquitin protein ligase binding	GO:0006511//ubiquitin-dependent protein catabolic process
Mesophyll	SK1G00054938	SK1G00054938-PEX22	0.299569	0.377825	23989	15404	0.141	0.178	0.334730870134595	1.30832002980587e-21	4.81828100576905e-17	up	PEX22	XP_015635792.1 peroxisome biogenesis protein 22 [Oryza sativa Japonica Group]	-	-	-	-	-	-	-
Mesophyll	SK1G00050466	SK1G00050466-RPL10A	0.463205	0.572648	23989	15404	0.19	0.231	0.30593724855782	1.35599808840763e-21	4.9938697599876e-17	up	RPL10A	XP_015627347.1 60S ribosomal protein L10a [Oryza sativa Japonica Group]	Genetic Information Processing	Translation	ko03010//Ribosome	K02865	GO:0000311//plastid large ribosomal subunit;GO:0022625//cytosolic large ribosomal subunit	GO:0003735//structural constituent of ribosome	GO:0006412//translation
Mesophyll	SK1G00047262	At2g33220	0.348804	0.425703	23989	15404	0.164	0.203	0.28735488751211	1.3731984015587e-21	5.05721507326037e-17	up	At2g33220	KAF2937732.1 hypothetical protein DAI22_03g071100 [Oryza sativa Japonica Group]	Metabolism;Metabolism	Global and overview maps;Energy metabolism	ko01100//Metabolic pathways;ko00190//Oxidative phosphorylation	K11353;K11353	-	-	-
Mesophyll	SK1G00073502	SK1G00073502-AAO	0.696324	0.574031	23989	15404	0.283	0.247	-0.278586	1.49941275073988e-21	5.52203727842483e-17	down	AAO	XP_015612667.1 L-ascorbate oxidase [Oryza sativa Japonica Group]	-	-	-	-	-	GO:0005375//copper ion transmembrane transporter activity;GO:0005507//copper ion binding;GO:0016491//oxidoreductase activity;GO:0050304//nitrous-oxide reductase activity	GO:0006825//copper ion transport;GO:0019333//denitrification pathway;GO:0055114//oxidation-reduction process
Mesophyll	SK1G00059225	SODA	0.323122	0.425546	23989	15404	0.132	0.168	0.397129385576675	1.53747297671386e-21	5.66220547864181e-17	up	SODA	ATU90093.1 manganese superoxide dismutase [Oryza sativa]	Cellular Processes	Transport and catabolism	ko04146//Peroxisome	K04564	-	GO:0004784//superoxide dismutase activity;GO:0046872//metal ion binding	GO:0006801//superoxide metabolic process;GO:0055114//oxidation-reduction process
Mesophyll	SK1G00074884	SK1G00074884-Sb03g046810	0.347971	0.262259	23989	15404	0.142	0.109	-0.40784	1.73718341373713e-21	6.39769907611111e-17	down	Sb03g046810	CAB53489.1 CAA303716.1 protein [Oryza sativa]	Metabolism;Metabolism;Metabolism	Global and overview maps;Global and overview maps;Biosynthesis of other secondary metabolites	ko01100//Metabolic pathways;ko01110//Biosynthesis of secondary metabolites;ko00940//Phenylpropanoid biosynthesis	K00430;K00430;K00430	-	GO:0004096//catalase activity;GO:0004601//peroxidase activity;GO:0020037//heme binding	GO:0006979//response to oxidative stress;GO:0055114//oxidation-reduction process
Mesophyll	SK1G00073746	TAF2	0.702148	0.875483	23989	15404	0.231	0.272	0.31826470164534	1.98087398066136e-21	7.29516269597965e-17	up	TAF2	EEC84563.1 hypothetical protein OsI_31331 [Oryza sativa Indica Group]	Genetic Information Processing	Transcription	ko03022//Basal transcription factors	K03128	-	GO:0008237//metallopeptidase activity;GO:0008270//zinc ion binding	-
Mesophyll	SK1G00045193	SK1G00045193-RZ1A	0.214945	0.288428	23989	15404	0.102	0.134	0.424076095379037	2.03003987387881e-21	7.47623084752088e-17	up	RZ1A	XP_015632520.1 glycine-rich RNA-binding protein RZ1C isoform X1 [Oryza sativa Japonica Group]	Genetic Information Processing	Transcription	ko03040//Spliceosome	K12885	-	GO:0003676//nucleic acid binding;GO:0008270//zinc ion binding	GO:0008380//RNA splicing
Mesophyll	SK1G00053384	SAPK7	0.299431	0.401784	23989	15404	0.117	0.151	0.424070149007599	2.04002444495351e-21	7.5130020258748e-17	up	SAPK7	XP_015636932.1 serine/threonine-protein kinase SAPK7 [Oryza sativa Japonica Group]	Environmental Information Processing;Environmental Information Processing	Signal transduction;Signal transduction	ko04075//Plant hormone signal transduction;ko04016//MAPK signaling pathway - plant	K14498;K14498	-	GO:0004672//protein kinase activity;GO:0005524//ATP binding	GO:0006383//transcription from RNA polymerase III promoter;GO:0006468//protein phosphorylation;GO:0030254//protein secretion by the type III secretion system
Mesophyll	SK1G00064521	RBM25	0.163689	0.238199	23989	15404	0.077	0.105	0.54092959338834	3.36706824558066e-21	1.24002389348245e-16	up	RBM25	EEC83581.1 hypothetical protein OsI_29243 [Oryza sativa Indica Group]	Genetic Information Processing	Transcription	ko03040//Spliceosome	K12822	-	GO:0003676//nucleic acid binding	GO:0006397//mRNA processing;GO:0008380//RNA splicing
Mesophyll	SK1G00070403	MCCA	0.172958	0.238601	23989	15404	0.083	0.112	0.463951421938108	3.51315003705417e-21	1.29382289564631e-16	up	MCCA	EEC69634.1 hypothetical protein OsI_39029 [Oryza sativa Indica Group]	Metabolism;Metabolism	Global and overview maps;Amino acid metabolism	ko01100//Metabolic pathways;ko00280//Valine, leucine and isoleucine degradation	K01968;K01968	GO:0005737//cytoplasm;GO:0009317//acetyl-CoA carboxylase complex;GO:0045252//oxoglutarate dehydrogenase complex;GO:0045254//pyruvate dehydrogenase complex	GO:0003989//acetyl-CoA carboxylase activity;GO:0004075//biotin carboxylase activity;GO:0004149//dihydrolipoyllysine-residue succinyltransferase activity;GO:0004736//pyruvate carboxylase activity;GO:0004742//dihydrolipoyllysine-residue acetyltransferase activity;GO:0004847//urea carboxylase activity;GO:0005215//transporter activity;GO:0005524//ATP binding;GO:0008948//oxaloacetate decarboxylase act…	GO:0006086//acetyl-CoA biosynthetic process from pyruvate;GO:0006094//gluconeogenesis;GO:0006099//tricarboxylic acid cycle;GO:0006554//lysine catabolic process;GO:0006633//fatty acid biosynthetic process;GO:0006810//transport;GO:0006814//sodium ion transport;GO:0019627//urea metabolic process
Mesophyll	SK1G00053654	SK1G00053654	0.540779	0.662202	23989	15404	0.16	0.198	0.292183355914611	3.58108173321114e-21	1.318840780707e-16	up	--	XP_015634510.1 heavy metal-associated isoprenylated plant protein 16 [Oryza sativa Japonica Group]	-	-	-	-	-	GO:0046872//metal ion binding	-
Mesophyll	SK1G00043538	CGR2	0.637272	0.767718	23989	15404	0.248	0.292	0.268630281528816	3.62984934253088e-21	1.33680091586727e-16	up	CGR2	EEE53853.1 hypothetical protein OsJ_00337 [Oryza sativa Japonica Group]	-	-	-	-	-	-	GO:0009086//methionine biosynthetic process
Mesophyll	SK1G00054755	PAO3	0.759255	0.628311	23989	15404	0.299	0.257	-0.273065	4.09797306665457e-21	1.50920152098755e-16	down	PAO3	EEC78042.1 hypothetical protein OsI_17477 [Oryza sativa Indica Group]	Metabolism;Metabolism;Metabolism	Global and overview maps;Amino acid metabolism;Metabolism of other amino acids	ko01100//Metabolic pathways;ko00330//Arginine and proline metabolism;ko00410//beta-Alanine metabolism	K17839;K17839;K17839	GO:0009342//glutamate synthase complex (NADPH);GO:0009360//DNA polymerase III complex	GO:0003723//RNA binding;GO:0003824//catalytic activity;GO:0003887//DNA-directed DNA polymerase activity;GO:0004148//dihydrolipoyl dehydrogenase activity;GO:0004527//exonuclease activity;GO:0004729//oxygen-dependent protoporphyrinogen oxidase activity;GO:0004791//thioredoxin-disulfide reductase activity;GO:0008026//ATP-dependent helicase activity;GO:0008767//UDP-galactopyranose mutase activity;GO:…	GO:0006096//glycolytic process;GO:0006139//nucleobase-containing compound metabolic process;GO:0006260//DNA replication;GO:0006537//glutamate biosynthetic process;GO:0006744//ubiquinone biosynthetic process;GO:0006779//porphyrin-containing compound biosynthetic process;GO:0009228//thiamine biosynthetic process;GO:0009273//peptidoglycan-based cell wall biogenesis;GO:0015995//chlorophyll biosynthet…
Mesophyll	SK1G00061988	UPF1	0.193651	0.254602	23989	15404	0.096	0.127	0.394611671206429	4.34589782513459e-21	1.60050725104057e-16	up	UPF1	XP_015646969.1 regulator of nonsense transcripts 1 homolog isoform X1 [Oryza sativa Japonica Group]	Genetic Information Processing;Genetic Information Processing	Translation;Translation	ko03013//RNA transport;ko03015//mRNA surveillance pathway	K14326;K14326	GO:0005737//cytoplasm;GO:0005840//ribosome;GO:0009338//exodeoxyribonuclease V complex;GO:0048501//signal recognition particle, plasma membrane targeting	GO:0003676//nucleic acid binding;GO:0003677//DNA binding;GO:0003678//DNA helicase activity;GO:0003723//RNA binding;GO:0003724//RNA helicase activity;GO:0003735//structural constituent of ribosome;GO:0003924//GTPase activity;GO:0004003//ATP-dependent DNA helicase activity;GO:0004386//helicase activity;GO:0004798//thymidylate kinase activity;GO:0005047//signal recognition particle binding;GO:000504…	GO:0000184//nuclear-transcribed mRNA catabolic process, nonsense-mediated decay;GO:0000723//telomere maintenance;GO:0006268//DNA unwinding involved in DNA replication;GO:0006281//DNA repair;GO:0006310//DNA recombination;GO:0006412//translation;GO:0006614//SRP-dependent cotranslational protein targeting to membrane;GO:0009306//protein secretion;GO:0015949//nucleobase-containing small molecule inte…
Mesophyll	SK1G00061367	SK1G00061367	0.566943	0.704063	23989	15404	0.215	0.255	0.312450988242875	5.49847915093412e-21	2.02497990170602e-16	up	--	-	-	-	-	-	-	-	-
Mesophyll	SK1G00057515	SK1G00057515-At1g14600	1.19102	0.971067	23989	15404	0.313	0.276	-0.294525	6.12724338658252e-21	2.25654119441061e-16	down	At1g14600	XP_015641452.1 probable transcription factor KAN3 [Oryza sativa Japonica Group]	-	-	-	-	-	-	-
Mesophyll	SK1G00047530	SE14	0.172037	0.237364	23989	15404	0.084	0.114	0.464150069433965	9.57620461069517e-21	3.52672463402682e-16	up	SE14	XP_015630483.1 lysine-specific demethylase SE14-like isoform X2 [Oryza sativa Japonica Group]	-	-	-	-	-	GO:0003677//DNA binding;GO:0030337//DNA polymerase processivity factor activity	GO:0006260//DNA replication;GO:0006275//regulation of DNA replication
Mesophyll	SK1G00069703	At3g62120	0.162409	0.212999	23989	15404	0.079	0.108	0.391007795177235	9.68540829840276e-21	3.56694216813577e-16	up	At3g62120	XP_015620497.1 proline--tRNA ligase, cytoplasmic [Oryza sativa Japonica Group]	Genetic Information Processing	Translation	ko00970//Aminoacyl-tRNA biosynthesis	K01881	GO:0005737//cytoplasm;GO:0009345//glycine-tRNA ligase complex	GO:0000166//nucleotide binding;GO:0004812//aminoacyl-tRNA ligase activity;GO:0004820//glycine-tRNA ligase activity;GO:0004827//proline-tRNA ligase activity;GO:0004829//threonine-tRNA ligase activity;GO:0005524//ATP binding	GO:0006418//tRNA aminoacylation for protein translation;GO:0006426//glycyl-tRNA aminoacylation;GO:0006433//prolyl-tRNA aminoacylation;GO:0006435//threonyl-tRNA aminoacylation
Mesophyll	SK1G00043895	SNF4	0.746863	0.608492	23989	15404	0.281	0.255	-0.295561	1.05097962498374e-20	3.87054776289011e-16	down	SNF4	XP_015630980.1 sucrose nonfermenting 4-like protein [Oryza sativa Japonica Group]	-	-	-	-	GO:0005840//ribosome;GO:0022626//cytosolic ribosome	GO:0045182//translation regulator activity	GO:0009386//translational attenuation;GO:0044238//primary metabolic process
Mesophyll	SK1G00053062	SK1G00053062-CLKR27	0.389998	0.492667	23989	15404	0.167	0.205	0.337067710146024	1.0961998281596e-20	4.03708472714619e-16	up	CLKR27	EAZ30445.1 hypothetical protein OsJ_14493 [Oryza sativa Japonica Group]	Metabolism;Metabolism;Metabolism;Metabolism;Metabolism	Global and overview maps;Global and overview maps;Global and overview maps;Lipid metabolism;Metabolism of cofactors and vitamins	ko01100//Metabolic pathways;ko01110//Biosynthesis of secondary metabolites;ko01212//Fatty acid metabolism;ko00061//Fatty acid biosynthesis;ko00780//Biotin metabolism	K00059;K00059;K00059;K00059;K00059	-	GO:0003824//catalytic activity;GO:0004316//3-oxoacyl-[acyl-carrier-protein] reductase (NADPH) activity;GO:0004757//sepiapterin reductase activity;GO:0008667//2,3-dihydro-2,3-dihydroxybenzoate dehydrogenase activity;GO:0008678//2-deoxy-D-gluconate 3-dehydrogenase activity;GO:0016491//oxidoreductase activity;GO:0016630//protochlorophyllide reductase activity;GO:0016655//oxidoreductase activity, act…	GO:0000272//polysaccharide catabolic process;GO:0006633//fatty acid biosynthetic process;GO:0006729//tetrahydrobiopterin biosynthetic process;GO:0008152//metabolic process;GO:0015995//chlorophyll biosynthetic process;GO:0055114//oxidation-reduction process
Mesophyll	SK1G00066140	SK1G00066140-RIXI	0.32861	0.248816	23989	15404	0.155	0.129	-0.401157	1.37815781037712e-20	5.07547958405687e-16	down	RIXI	EAY81873.1 hypothetical protein OsI_37038 [Oryza sativa Indica Group]	Metabolism;Metabolism	Global and overview maps;Carbohydrate metabolism	ko01100//Metabolic pathways;ko00520//Amino sugar and nucleotide sugar metabolism	K01183;K01183	-	-	GO:0005975//carbohydrate metabolic process
Mesophyll	SK1G00047506	SK1G00047506	0.995637	0.822357	23989	15404	0.326	0.293	-0.275824	1.50253905338272e-20	5.53355082579788e-16	down	--	EAY88855.1 hypothetical protein OsI_10329 [Oryza sativa Indica Group]	-	-	-	-	-	GO:0005515//protein binding	-
Mesophyll	SK1G00045382	RPB2	0.279611	0.363524	23989	15404	0.135	0.17	0.378508193592033	1.58167005639853e-20	5.82497448370452e-16	up	RPB2	XP_015631661.1 DNA-directed RNA polymerase II subunit RPB2 [Oryza sativa Japonica Group]	Genetic Information Processing	Transcription	ko03020//RNA polymerase	K03010	GO:0000345//cytosolic DNA-directed RNA polymerase complex	GO:0003677//DNA binding;GO:0003899//DNA-directed RNA polymerase activity	GO:0006351//transcription, DNA-templated
Mesophyll	SK1G00048854	SK1G00048854-ARP1	0.281422	0.20828	23989	15404	0.131	0.102	-0.434035	1.62258346755724e-20	5.97565039431981e-16	down	ARP1	XP_015626303.1 RNA-binding protein 24 isoform X4 [Oryza sativa Japonica Group]	-	-	-	-	-	GO:0003676//nucleic acid binding	GO:0008380//RNA splicing
Mesophyll	SK1G00063296	SK1G00063296-At1g64760	0.23939	0.171264	23989	15404	0.112	0.085	-0.482899	1.62572957795287e-20	5.98723688968483e-16	down	At1g64760	XP_015644899.1 glucan endo-1,3-beta-glucosidase 8 [Oryza sativa Japonica Group]	-	-	-	-	-	GO:0004553//hydrolase activity, hydrolyzing O-glycosyl compounds	GO:0005975//carbohydrate metabolic process
Mesophyll	SK1G00055252	SK1G00055252	0.217383	0.300619	23989	15404	0.089	0.118	0.46751502991748	2.30427096439308e-20	8.48616910766682e-16	up	--	AAO33152.1 unknown [Oryza sativa Japonica Group]	-	-	-	-	-	-	-
Mesophyll	SK1G00057008	RSA1	0.320484	0.402715	23989	15404	0.141	0.177	0.329415968580563	2.33352734956951e-20	8.5939145229946e-16	up	RSA1	EEC80815.1 hypothetical protein OsI_23387 [Oryza sativa Indica Group]	-	-	-	-	-	GO:0005509//calcium ion binding	-
Mesophyll	SK1G00043300	SSRP1-A	0.231324	0.303853	23989	15404	0.111	0.143	0.393306391525788	2.92527754651272e-20	1.0773212148297e-15	up	SSRP1-A	AAM46895.1 early drought induced protein [Oryza sativa Indica Group]	-	-	-	-	GO:0005634//nucleus	-	GO:0006270//DNA replication initiation;GO:0006338//chromatin remodeling;GO:0006355//regulation of transcription, DNA-templated;GO:0043486//histone exchange
Mesophyll	SK1G00055499	SK1G00055499-At5g45920	0.591499	0.448491	23989	15404	0.197	0.165	-0.39922	4.26701855512437e-20	1.5714575934812e-15	down	At5g45920	XP_015641063.1 GDSL esterase/lipase At5g45920 [Oryza sativa Japonica Group]	-	-	-	-	-	GO:0016788//hydrolase activity, acting on ester bonds	-
Mesophyll	SK1G00055031	PEL1	0.375234	0.461551	23989	15404	0.177	0.216	0.298630442094775	4.32303897759728e-20	1.59208879466953e-15	up	PEL1	AWJ76619.1 Pelota [Oryza sativa]	Genetic Information Processing	Translation	ko03015//mRNA surveillance pathway	K06965	-	GO:0003747//translation release factor activity	GO:0006402//mRNA catabolic process;GO:0006415//translational termination
Mesophyll	SK1G00047069	Os03g0237900	0.208422	0.269066	23989	15404	0.105	0.136	0.368298024553147	4.37353797595133e-20	1.61068656578336e-15	up	Os03g0237900	AAO06978.1 Unknown protein [Oryza sativa Japonica Group]	-	-	-	-	-	-	-
Mesophyll	SK1G00043835	XAX1	0.685918	0.566754	23989	15404	0.28	0.242	-0.275269	4.75805491628465e-20	1.75229646456931e-15	down	XAX1	XP_025878180.1 uncharacterized protein LOC4326078 isoform X1 [Oryza sativa Japonica Group]	-	-	-	-	-	-	-
Mesophyll	SK1G00047339	CYCD5-3	0.335375	0.429414	23989	15404	0.15	0.186	0.356500431918724	5.08894005219311e-20	1.87415484242168e-15	up	CYCD5-3	EEC74713.1 hypothetical protein OsI_10433 [Oryza sativa Indica Group]	-	-	-	-	-	-	-
Mesophyll	SK1G00071160	GSTU17	2.54102	2.09746	23989	15404	0.404	0.368	-0.276751	5.17832910806834e-20	1.90707504391941e-15	down	GSTU17	XP_024317192.1 LOW QUALITY PROTEIN: uncharacterized protein LOC100840442 [Brachypodium distachyon]	Metabolism;Metabolism	Global and overview maps;Metabolism of other amino acids	ko01100//Metabolic pathways;ko00480//Glutathione metabolism	K00799;K00799	-	GO:0005515//protein binding;GO:0015035//protein disulfide oxidoreductase activity;GO:0016034//maleylacetoacetate isomerase activity	GO:0006559//L-phenylalanine catabolic process;GO:0006572//tyrosine catabolic process;GO:0006749//glutathione metabolic process;GO:0006790//sulfur compound metabolic process;GO:0042965//glutaredoxin biosynthetic process;GO:0045454//cell redox homeostasis;GO:0055114//oxidation-reduction process
Mesophyll	SK1G00041857	AIP1	0.264184	0.340286	23989	15404	0.125	0.159	0.365080233560814	5.29233532103665e-20	1.94906125203138e-15	up	AIP1	BAF05211.1 Os01g0549700, partial [Oryza sativa Japonica Group]	Genetic Information Processing;Genetic Information Processing;Genetic Information Processing	Transcription;Translation;Translation	ko03040//Spliceosome;ko03013//RNA transport;ko03015//mRNA surveillance pathway	K12812;K12812;K12812	GO:0009380//excinuclease repair complex;GO:0022625//cytosolic large ribosomal subunit	GO:0003676//nucleic acid binding;GO:0003677//DNA binding;GO:0003690//double-stranded DNA binding;GO:0003735//structural constituent of ribosome;GO:0004003//ATP-dependent DNA helicase activity;GO:0004386//helicase activity;GO:0005515//protein binding;GO:0005524//ATP binding;GO:0008026//ATP-dependent helicase activity;GO:0009381//excinuclease ABC activity;GO:0016787//hydrolase activity;GO:0016887//…	GO:0006139//nucleobase-containing compound metabolic process;GO:0006268//DNA unwinding involved in DNA replication;GO:0006281//DNA repair;GO:0006289//nucleotide-excision repair;GO:0006310//DNA recombination;GO:0006412//translation;GO:0043571//maintenance of CRISPR repeat elements
Mesophyll	SK1G00051731	Os02g0137500	0.243664	0.31998	23989	15404	0.119	0.152	0.392950084939441	5.78525842520555e-20	2.1305949728347e-15	up	Os02g0137500	XP_015625488.1 probable histone acetyltransferase HAC-like 1 [Oryza sativa Japonica Group]	-	-	-	-	-	GO:0004402//histone acetyltransferase activity;GO:0008270//zinc ion binding	GO:0006355//regulation of transcription, DNA-templated;GO:0016573//histone acetylation
Mesophyll	SK1G00059897	SK1G00059897	0.325741	0.250768	23989	15404	0.126	0.096	-0.37724	6.21765355580667e-20	2.28983745153248e-15	down	--	-	-	-	-	-	-	-	-
Mesophyll	SK1G00071490	SK1G00071490	0.15787	0.214966	23989	15404	0.077	0.105	0.445123391614622	8.65599080840252e-20	3.18782829491848e-15	up	--	KAB8112900.1 hypothetical protein EE612_051696, partial [Oryza sativa]	-	-	-	-	-	-	-
Mesophyll	SK1G00044657	SK1G00044657	0.482704	0.609448	23989	15404	0.167	0.204	0.336301695768104	9.33554627430909e-20	3.43809498190255e-15	up	--	XP_015632320.1 uncharacterized protein LOC4334013 [Oryza sativa Japonica Group]	-	-	-	-	-	-	-
Mesophyll	SK1G00067904	SK1G00067904	0.362425	0.278277	23989	15404	0.161	0.135	-0.381039	9.65863693160395e-20	3.5570828091711e-15	down	--	ABR26077.1 unknown, partial [Oryza sativa Indica Group]	-	-	-	-	GO:0005576//extracellular region	GO:0008200//ion channel inhibitor activity	GO:0009405//pathogenesis
Mesophyll	SK1G00048651	SK1G00048651	0.322844	0.40376	23989	15404	0.156	0.192	0.322572252479122	9.95639337531279e-20	3.66674055226019e-15	up	--	XP_015625154.1 uncharacterized protein LOC4330692 [Oryza sativa Japonica Group]	-	-	-	-	GO:0005634//nucleus	GO:0003682//chromatin binding	-
Mesophyll	SK1G00043928	At4g00755	0.262721	0.33997	23989	15404	0.121	0.153	0.371751744878748	1.06168039120662e-19	3.90995654473576e-15	up	At4g00755	XP_015630826.1 F-box protein At4g00755 isoform X1 [Oryza sativa Japonica Group]	-	-	-	-	-	GO:0005515//protein binding	-
Mesophyll	SK1G00048972	JMJ706	0.223016	0.277442	23989	15404	0.107	0.138	0.314907491856881	1.16981503210729e-19	4.30819480024471e-15	up	JMJ706	EEC73831.1 hypothetical protein OsI_08565 [Oryza sativa Indica Group]	-	-	-	-	-	-	-
Mesophyll	SK1G00044475	SK1G00044475-AAP19-1	0.495228	0.603995	23989	15404	0.219	0.259	0.286392481043052	1.26041522812255e-19	4.64185720212973e-15	up	AAP19-1	XP_015628195.1 AP-1 complex subunit sigma-1 isoform X2 [Oryza sativa Japonica Group]	-	-	-	-	-	-	-
Mesophyll	SK1G00048875	HSP70-17	0.346421	0.265715	23989	15404	0.151	0.119	-0.382518	1.53175481753855e-19	5.64114664203099e-15	down	HSP70-17	EAY87257.1 hypothetical protein OsI_08658 [Oryza sativa Indica Group]	Genetic Information Processing	Folding, sorting and degradation	ko04141//Protein processing in endoplasmic reticulum	K09486	GO:0016020//membrane;GO:0042613//MHC class II protein complex	GO:0005515//protein binding;GO:0005524//ATP binding;GO:0016887//ATPase activity;GO:0051082//unfolded protein binding	GO:0006457//protein folding;GO:0006950//response to stress;GO:0006955//immune response;GO:0008360//regulation of cell shape;GO:0019882//antigen processing and presentation
Mesophyll	SK1G00039999	CYP94C1	0.456298	0.334419	23989	15404	0.149	0.12	-0.448205	1.55290794408124e-19	5.7190493764624e-15	down	CYP94C1	EAY76557.1 hypothetical protein OsI_04502 [Oryza sativa Indica Group]	-	-	-	-	-	GO:0005506//iron ion binding;GO:0016705//oxidoreductase activity, acting on paired donors, with incorporation or reduction of molecular oxygen;GO:0020037//heme binding	GO:0055114//oxidation-reduction process
Mesophyll	SK1G00064093	SK1G00064093-RGLG2	0.22032	0.298683	23989	15404	0.102	0.131	0.438842853173966	1.76939146113257e-19	6.51631487305903e-15	up	RGLG2	XP_015651091.1 E3 ubiquitin-protein ligase RGLG2 [Oryza sativa Japonica Group]	-	-	-	-	-	GO:0003723//RNA binding;GO:0008270//zinc ion binding;GO:0046872//metal ion binding	-
Mesophyll	SK1G00064329	SK1G00064329	0.711868	0.586923	23989	15404	0.273	0.245	-0.278395	2.21660585394675e-19	8.16331603891509e-15	down	--	EAZ07175.1 hypothetical protein OsI_29420 [Oryza sativa Indica Group]	-	-	-	-	-	-	-
Mesophyll	SK1G00074452	SK1G00074452	0.348283	0.454391	23989	15404	0.136	0.169	0.383575596101827	2.55627648661441e-19	9.41425504490356e-15	up	--	XP_015651153.1 uncharacterized protein LOC4347639 [Oryza sativa Japonica Group]	-	-	-	-	-	-	-
Mesophyll	SK1G00048254	MGD3	0.648864	0.535552	23989	15404	0.258	0.225	-0.276842	2.93764232151383e-19	1.08187491416711e-14	down	MGD3	EAY87902.1 hypothetical protein OsI_09321 [Oryza sativa Indica Group]	Metabolism;Metabolism	Global and overview maps;Lipid metabolism	ko01100//Metabolic pathways;ko00561//Glycerolipid metabolism	K03715;K03715	-	GO:0016758//transferase activity, transferring hexosyl groups;GO:0050511//undecaprenyldiphospho-muramoylpentapeptide beta-N-acetylglucosaminyltransferase activity	GO:0009247//glycolipid biosynthetic process;GO:0009252//peptidoglycan biosynthetic process
Mesophyll	SK1G00059194	WAKL20	0.34217	0.428412	23989	15404	0.159	0.195	0.324198195168677	2.94927057342799e-19	1.08615736678206e-14	up	WAKL20	XP_015637428.1 wall-associated receptor kinase-like 20 [Oryza sativa Japonica Group]	-	-	-	-	-	GO:0004672//protein kinase activity;GO:0005524//ATP binding;GO:0016787//hydrolase activity;GO:0030247//polysaccharide binding;GO:0046872//metal ion binding	GO:0006468//protein phosphorylation
Mesophyll	SK1G00063651	CYP18-2	0.594777	0.715531	23989	15404	0.232	0.272	0.266623461129714	3.2632832998366e-19	1.20180197366382e-14	up	CYP18-2	XP_015649749.1 peptidyl-prolyl cis-trans isomerase CYP18-2 [Oryza sativa Japonica Group]	Genetic Information Processing	Transcription	ko03040//Spliceosome	K12733	-	GO:0003755//peptidyl-prolyl cis-trans isomerase activity;GO:0008703//5-amino-6-(5-phosphoribosylamino)uracil reductase activity;GO:0008835//diaminohydroxyphosphoribosylaminopyrimidine deaminase activity	GO:0000413//protein peptidyl-prolyl isomerization;GO:0009231//riboflavin biosynthetic process
Mesophyll	SK1G00057484	SK1G00057484-PBC1	0.426177	0.512945	23989	15404	0.184	0.222	0.26729407319713	3.27852119262986e-19	1.20741378482172e-14	up	PBC1	XP_015641231.1 proteasome subunit beta type-3 [Oryza sativa Japonica Group]	Genetic Information Processing	Folding, sorting and degradation	ko03050//Proteasome	K02735	GO:0000502//proteasome complex;GO:0005839//proteasome core complex	GO:0004175//endopeptidase activity;GO:0004298//threonine-type endopeptidase activity	GO:0010498//proteasomal protein catabolic process;GO:0051603//proteolysis involved in cellular protein catabolic process
Mesophyll	SK1G00074219	SK1G00074219-CjBAp12	3.43349	4.26132	23989	15404	0.375	0.417	0.311617525319678	3.63532728584357e-19	1.33881833283047e-14	up	CjBAp12	EAZ09461.1 hypothetical protein OsI_31732 [Oryza sativa Indica Group]	-	-	-	-	-	-	GO:0042742//defense response to bacterium;GO:0050832//defense response to fungus
Mesophyll	SK1G00061420	SK1G00061420	0.419895	0.330641	23989	15404	0.191	0.161	-0.344674	4.08867564605756e-19	1.50577746693008e-14	down	--	EAZ04731.1 hypothetical protein OsI_26893 [Oryza sativa Indica Group]	-	-	-	-	-	-	-
Mesophyll	SK1G00042715	PHT4;1	0.386573	0.467157	23989	15404	0.17	0.207	0.273102943906283	4.12965068123419e-19	1.52086775288493e-14	up	PHT4;1	XP_015648040.1 probable anion transporter 1, chloroplastic [Oryza sativa Japonica Group]	-	-	-	-	GO:0005887//integral component of plasma membrane	GO:0008028//monocarboxylic acid transmembrane transporter activity;GO:0015114//phosphate ion transmembrane transporter activity;GO:0015238//drug transmembrane transporter activity;GO:0015307//drug:proton antiporter activity;GO:0015535//fucose:proton symporter activity;GO:0022857//transmembrane transporter activity;GO:0042910//xenobiotic transporter activity	GO:0006817//phosphate ion transport;GO:0006855//drug transmembrane transport;GO:0015718//monocarboxylic acid transport;GO:0015756//fucose transport;GO:0015893//drug transport;GO:0042493//response to drug;GO:0042908//xenobiotic transport;GO:0055085//transmembrane transport
Mesophyll	SK1G00044554	SK1G00044554	0.217047	0.28336	23989	15404	0.103	0.133	0.384471905021547	4.32405133012423e-19	1.59246162385815e-14	up	--	XP_015631032.1 uncharacterized protein LOC4334139 [Oryza sativa Japonica Group]	-	-	-	-	-	GO:0005515//protein binding	GO:0006457//protein folding;GO:0009408//response to heat
Mesophyll	SK1G00071592	SK1G00071592-AIRP2	0.258854	0.331933	23989	15404	0.119	0.151	0.358634663969837	4.51393527056187e-19	1.66239208144253e-14	up	AIRP2	XP_015612824.1 E3 ubiquitin-protein ligase AIRP2 isoform X2 [Oryza sativa Japonica Group]	-	-	-	-	GO:0000109//nucleotide-excision repair complex;GO:0005680//anaphase-promoting complex;GO:0032040//small-subunit processome	GO:0008270//zinc ion binding;GO:0046872//metal ion binding;GO:0061630//ubiquitin protein ligase activity;GO:0097602//cullin family protein binding	GO:0006289//nucleotide-excision repair;GO:0006364//rRNA processing;GO:0031145//anaphase-promoting complex-dependent proteasomal ubiquitin-dependent protein catabolic process
Mesophyll	SK1G00051714	MPK13	0.267455	0.346761	23989	15404	0.123	0.156	0.374519390970495	4.82700017946077e-19	1.77768762609181e-14	up	MPK13	XP_015626450.1 mitogen-activated protein kinase 13 isoform X3 [Oryza sativa Japonica Group]	Environmental Information Processing	Signal transduction	ko04016//MAPK signaling pathway - plant	K20538	-	-	-
Mesophyll	SK1G00041879	LAT56	0.5665	0.458265	23989	15404	0.233	0.201	-0.305833	6.218854708919e-19	2.29027981220069e-14	down	LAT56	XP_015618887.1 putative pectate lyase 21 [Oryza sativa Japonica Group]	Metabolism;Metabolism	Global and overview maps;Carbohydrate metabolism	ko01100//Metabolic pathways;ko00040//Pentose and glucuronate interconversions	K01728;K01728	-	-	-
Mesophyll	SK1G00048363	SIS8	0.501804	0.612269	23989	15404	0.226	0.265	0.286987929406285	6.47078118689685e-19	2.38305929551037e-14	up	SIS8	EEC74138.1 hypothetical protein OsI_09208 [Oryza sativa Indica Group]	-	-	-	-	-	GO:0004672//protein kinase activity;GO:0005515//protein binding;GO:0005524//ATP binding	GO:0006468//protein phosphorylation
Mesophyll	SK1G00049729	SK1G00049729	0.92067	0.765117	23989	15404	0.31	0.277	-0.266972	6.85240487844687e-19	2.52360366863441e-14	down	--	XP_015624015.1 uncharacterized protein LOC4329748 [Oryza sativa Japonica Group]	-	-	-	-	-	-	-
Mesophyll	SK1G00070347	NAT3	0.197175	0.260038	23989	15404	0.09	0.118	0.399070237186489	7.89996806285674e-19	2.90940023818888e-14	up	NAT3	XP_015620184.1 nucleobase-ascorbate transporter 3 isoform X1 [Oryza sativa Japonica Group]	-	-	-	-	GO:0016020//membrane;GO:0016021//integral component of membrane	GO:0015205//nucleobase transmembrane transporter activity;GO:0022857//transmembrane transporter activity;GO:0042907//xanthine transmembrane transporter activity	GO:0015851//nucleobase transport;GO:0042906//xanthine transport;GO:0055085//transmembrane transport
Mesophyll	SK1G00055896	SK1G00055896	1.00558	0.783542	23989	15404	0.243	0.209	-0.359903	8.4335421863152e-19	3.10590491637616e-14	down	--	EEE65452.1 hypothetical protein OsJ_20817 [Oryza sativa Japonica Group]	-	-	-	-	-	-	-
Mesophyll	SK1G00060295	At4g02580	0.334498	0.408137	23989	15404	0.163	0.199	0.286976642296379	9.07624905681504e-19	3.34260100264384e-14	up	At4g02580	XP_015637532.1 NADH dehydrogenase [ubiquinone] flavoprotein 2, mitochondrial [Oryza sativa Japonica Group]	Metabolism;Metabolism	Global and overview maps;Energy metabolism	ko01100//Metabolic pathways;ko00190//Oxidative phosphorylation	K03943;K03943	-	-	-
Mesophyll	SK1G00054772	GLN2	0.322681	0.240423	23989	15404	0.139	0.116	-0.424376	1.20979115383068e-18	4.45541886132764e-14	down	GLN2	XP_015635322.1 glutamine synthetase, chloroplastic [Oryza sativa Japonica Group]	Metabolism;Metabolism;Metabolism;Metabolism;Metabolism;Metabolism	Global and overview maps;Global and overview maps;Carbohydrate metabolism;Amino acid metabolism;Amino acid metabolism;Energy metabolism	ko01100//Metabolic pathways;ko01230//Biosynthesis of amino acids;ko00630//Glyoxylate and dicarboxylate metabolism;ko00250//Alanine, aspartate and glutamate metabolism;ko00220//Arginine biosynthesis;ko00910//Nitrogen metabolism	K01915;K01915;K01915;K01915;K01915;K01915	-	GO:0004356//glutamate-ammonia ligase activity	GO:0006542//glutamine biosynthetic process;GO:0006807//nitrogen compound metabolic process
Mesophyll	SK1G00068340	NAC45	0.246346	0.189293	23989	15404	0.122	0.093	-0.379884	1.21625536785479e-18	4.47922526873563e-14	down	NAC45	EAY79781.1 hypothetical protein OsI_34937 [Oryza sativa Indica Group]	-	-	-	-	-	GO:0003677//DNA binding	GO:0006355//regulation of transcription, DNA-templated
Mesophyll	SK1G00057502	TUBB3	0.226287	0.301728	23989	15404	0.101	0.13	0.414936832938732	1.26103382256801e-18	4.64413536175348e-14	up	TUBB3	XP_015643315.1 tubulin beta-3 chain [Oryza sativa Japonica Group]	Cellular Processes	Transport and catabolism	ko04145//Phagosome	K07375	-	GO:0003924//GTPase activity	GO:0000910//cytokinesis
Mesophyll	SK1G00045048	SK1G00045048	0.548065	0.662241	23989	15404	0.238	0.277	0.272965787935559	1.41453407909616e-18	5.20944610649535e-14	up	--	XP_015632544.1 uncharacterized protein LOC4333789 [Oryza sativa Japonica Group]	-	-	-	-	-	-	-
Mesophyll	SK1G00048918	SK1G00048918-IPP	0.459428	0.360722	23989	15404	0.195	0.163	-0.348865	1.42431611335496e-18	5.24547138226366e-14	down	IPP	XP_015625137.1 soluble inorganic pyrophosphatase [Oryza sativa Japonica Group]	Metabolism	Energy metabolism	ko00190//Oxidative phosphorylation	K01507	GO:0005737//cytoplasm	GO:0000287//magnesium ion binding;GO:0004427//inorganic diphosphatase activity	GO:0006796//phosphate-containing compound metabolic process
Mesophyll	SK1G00051013	SK1G00051013	0.222966	0.281904	23989	15404	0.102	0.131	0.338243559441692	1.88292986660364e-18	6.93445411272788e-14	up	--	XP_015622713.1 uncharacterized protein LOC4328817 [Oryza sativa Japonica Group]	-	-	-	-	-	GO:0005515//protein binding	-
Mesophyll	SK1G00059841	SK1G00059841-ERF110	0.311906	0.239382	23989	15404	0.15	0.121	-0.381656	1.94231088187978e-18	7.15314251578685e-14	down	ERF110	XP_015638449.2 ethylene-responsive transcription factor ABR1 [Oryza sativa Japonica Group]	-	-	-	-	-	GO:0003700//transcription factor activity, sequence-specific DNA binding	GO:0006355//regulation of transcription, DNA-templated
Mesophyll	SK1G00061173	SEC31B	0.293342	0.360965	23989	15404	0.141	0.175	0.299183674825228	2.44708716356027e-18	9.01213260595975e-14	up	SEC31B	EEC82603.1 hypothetical protein OsI_27174 [Oryza sativa Indica Group]	Genetic Information Processing	Folding, sorting and degradation	ko04141//Protein processing in endoplasmic reticulum	K14005	GO:0005681//spliceosomal complex	GO:0005515//protein binding	GO:0008380//RNA splicing
Mesophyll	SK1G00044096	RBCX2	0.277907	0.212048	23989	15404	0.141	0.115	-0.390052	2.69787716428104e-18	9.93574202061422e-14	down	RBCX2	XP_015630551.1 chaperonin-like RbcX protein 2, chloroplastic [Oryza sativa Japonica Group]	-	-	-	-	-	-	-
Mesophyll	SK1G00047054	GID8	0.170504	0.217865	23989	15404	0.083	0.109	0.353448421358526	2.74257825388449e-18	1.01003671934058e-13	up	GID8	XP_015629791.1 protein GID8 homolog [Oryza sativa Japonica Group]	-	-	-	-	-	GO:0005515//protein binding	-
Mesophyll	SK1G00065771	TOP1B	0.274257	0.343984	23989	15404	0.127	0.16	0.326708643102059	3.04865552119945e-18	1.12275885534733e-13	up	TOP1B	EAZ05628.1 hypothetical protein OsI_27847 [Oryza sativa Indica Group]	-	-	-	-	-	GO:0003677//DNA binding;GO:0003917//DNA topoisomerase type I activity;GO:0008565//protein transporter activity	GO:0006265//DNA topological change;GO:0030253//protein secretion by the type I secretion system
Mesophyll	SK1G00057634	EGC1	0.95599	0.74094	23989	15404	0.215	0.185	-0.367596	3.775947497047e-18	1.39060594421247e-13	down	EGC1	OEL13622.1 EG45-like domain containing protein [Dichanthelium oligosanthes]	-	-	-	-	-	-	GO:0042742//defense response to bacterium;GO:0050832//defense response to fungus
Mesophyll	SK1G00058187	AG118	0.454938	0.365594	23989	15404	0.203	0.174	-0.315353	4.62516496490614e-18	1.70335575327563e-13	down	AG118	XP_015639543.1 acetylornithine aminotransferase, mitochondrial [Oryza sativa Japonica Group]	Metabolism;Metabolism;Metabolism;Metabolism;Metabolism	Global and overview maps;Global and overview maps;Global and overview maps;Global and overview maps;Amino acid metabolism	ko01100//Metabolic pathways;ko01110//Biosynthesis of secondary metabolites;ko01230//Biosynthesis of amino acids;ko01210//2-Oxocarboxylic acid metabolism;ko00220//Arginine biosynthesis	K00818;K00818;K00818;K00818;K00818	GO:0005737//cytoplasm	GO:0003867//4-aminobutyrate transaminase activity;GO:0004015//adenosylmethionine-8-amino-7-oxononanoate transaminase activity;GO:0004400//histidinol-phosphate transaminase activity;GO:0004587//ornithine-oxo-acid transaminase activity;GO:0008483//transaminase activity;GO:0030170//pyridoxal phosphate binding;GO:0033094//butane-1,4-diamine:2-oxoglutarate aminotransferase activity;GO:0042286//glutama…	GO:0000105//histidine biosynthetic process;GO:0006779//porphyrin-containing compound biosynthetic process;GO:0008152//metabolic process;GO:0009102//biotin biosynthetic process;GO:0009447//putrescine catabolic process;GO:0009450//gamma-aminobutyric acid catabolic process;GO:0019491//ectoine biosynthetic process
Mesophyll	SK1G00046797	SK1G00046797	0.229564	0.295744	23989	15404	0.106	0.136	0.365314032208779	5.17796374242919e-18	1.90694048706182e-13	up	--	BAF11544.2 Os03g0262700, partial [Oryza sativa Japonica Group]	-	-	-	-	-	-	-
Mesophyll	SK1G00056973	CYP701A8	0.435819	0.328406	23989	15404	0.141	0.111	-0.408143	5.98447963781985e-18	2.20396416101629e-13	down	CYP701A8	BAD54592.1 putative ent-kaurene oxidase [Oryza sativa Japonica Group]	Metabolism;Metabolism	Global and overview maps;Metabolism of terpenoids and polyketides	ko01110//Biosynthesis of secondary metabolites;ko00904//Diterpenoid biosynthesis	K21719;K21719	-	GO:0005506//iron ion binding;GO:0016705//oxidoreductase activity, acting on paired donors, with incorporation or reduction of molecular oxygen;GO:0020037//heme binding	GO:0055114//oxidation-reduction process
Mesophyll	SK1G00072812	SK1G00072812	0.55974	0.465078	23989	15404	0.244	0.206	-0.267232	7.06556819656272e-18	2.60210745543012e-13	down	--	EAZ08119.1 hypothetical protein OsI_30382 [Oryza sativa Indica Group]	-	-	-	-	-	GO:0003676//nucleic acid binding	-
Mesophyll	SK1G00057942	HSP90	1.16729	0.967736	23989	15404	0.325	0.298	-0.270453	7.64148761326632e-18	2.81420705821372e-13	down	HSP90	EAZ02369.1 hypothetical protein OsI_24473 [Oryza sativa Indica Group]	Organismal Systems;Genetic Information Processing	Environmental adaptation;Folding, sorting and degradation	ko04626//Plant-pathogen interaction;ko04141//Protein processing in endoplasmic reticulum	K09487;K09487	GO:0016020//membrane	GO:0005524//ATP binding;GO:0016887//ATPase activity;GO:0046873//metal ion transmembrane transporter activity;GO:0051082//unfolded protein binding	GO:0006457//protein folding;GO:0030001//metal ion transport;GO:0055085//transmembrane transport
Mesophyll	SK1G00062982	ALDH6B2	0.188877	0.254748	23989	15404	0.084	0.111	0.431430876647916	9.82846450051957e-18	3.61962690625135e-13	up	ALDH6B2	EEC81650.1 hypothetical protein OsI_25188 [Oryza sativa Indica Group]	Metabolism;Metabolism;Metabolism;Metabolism;Metabolism;Metabolism	Global and overview maps;Global and overview maps;Carbohydrate metabolism;Amino acid metabolism;Metabolism of other amino acids;Carbohydrate metabolism	ko01100//Metabolic pathways;ko01200//Carbon metabolism;ko00562//Inositol phosphate metabolism;ko00280//Valine, leucine and isoleucine degradation;ko00410//beta-Alanine metabolism;ko00640//Propanoate metabolism	K00140;K00140;K00140;K00140;K00140;K00140	-	GO:0003842//1-pyrroline-5-carboxylate dehydrogenase activity;GO:0004350//glutamate-5-semialdehyde dehydrogenase activity;GO:0004491//methylmalonate-semialdehyde dehydrogenase (acylating) activity;GO:0004777//succinate-semialdehyde dehydrogenase (NAD+) activity;GO:0008802//betaine-aldehyde dehydrogenase activity;GO:0009013//succinate-semialdehyde dehydrogenase [NAD(P)+] activity;GO:0016491//oxidor…	GO:0006527//arginine catabolic process;GO:0006561//proline biosynthetic process;GO:0006562//proline catabolic process;GO:0006574//valine catabolic process;GO:0006578//amino-acid betaine biosynthetic process;GO:0009450//gamma-aminobutyric acid catabolic process;GO:0010124//phenylacetate catabolic process;GO:0055114//oxidation-reduction process
Mesophyll	SK1G00059272	SK1G00059272	0.181233	0.227301	23989	15404	0.092	0.12	0.326597730695178	1.15103650971866e-17	4.2390372579919e-13	up	--	KAF2930259.1 hypothetical protein DAI22_05g120700 [Oryza sativa Japonica Group]	-	-	-	-	-	-	GO:0006629//lipid metabolic process
Mesophyll	SK1G00059173	SNRPD2	0.420534	0.509663	23989	15404	0.182	0.218	0.277261310280862	1.55992195129399e-17	5.7448805622255e-13	up	SNRPD2	XP_006645341.1 PREDICTED: small nuclear ribonucleoprotein Sm D2-like [Oryza brachyantha]	Genetic Information Processing	Transcription	ko03040//Spliceosome	K11096	-	GO:0003723//RNA binding	GO:0006355//regulation of transcription, DNA-templated
Mesophyll	SK1G00050101	DOT2	0.182487	0.241713	23989	15404	0.085	0.111	0.405311945665216	1.63195320372916e-17	6.01015725869375e-13	up	DOT2	EAY86008.1 hypothetical protein OsI_07368 [Oryza sativa Indica Group]	Genetic Information Processing	Transcription	ko03040//Spliceosome	K11984	-	-	GO:0000398//mRNA splicing, via spliceosome
Mesophyll	SK1G00040145	At1g07660	0.70226	0.866826	23989	15404	0.225	0.261	0.303698664521371	1.70462823524955e-17	6.27780486477704e-13	up	At1g07660	XP_016507811.1 PREDICTED: uncharacterized protein LOC107825453 [Nicotiana tabacum]	-	-	-	-	GO:0071821//FANCM-MHF complex	GO:0003677//DNA binding	GO:0006352//DNA-templated transcription, initiation
Mesophyll	SK1G00041029	SK1G00041029-NMT1	0.245799	0.325031	23989	15404	0.104	0.133	0.402953686500208	1.80294254672931e-17	6.63987681109471e-13	up	NMT1	XP_015622327.1 phosphoethanolamine N-methyltransferase 1 isoform X2 [Oryza sativa Japonica Group]	Metabolism	Lipid metabolism	ko00564//Glycerophospholipid metabolism	K05929	GO:0005737//cytoplasm	GO:0000179//rRNA (adenine-N6,N6-)-dimethyltransferase activity;GO:0003723//RNA binding;GO:0004719//protein-L-isoaspartate (D-aspartate) O-methyltransferase activity;GO:0008168//methyltransferase activity;GO:0008170//N-methyltransferase activity;GO:0008171//O-methyltransferase activity;GO:0008173//RNA methyltransferase activity;GO:0008176//tRNA (guanine-N7-)-methyltransferase activity;GO:0008649//…	GO:0000154//rRNA modification;GO:0006364//rRNA processing;GO:0006400//tRNA modification;GO:0006412//translation;GO:0006464//cellular protein modification process;GO:0006480//N-terminal protein amino acid methylation;GO:0006744//ubiquinone biosynthetic process;GO:0008299//isoprenoid biosynthetic process;GO:0009086//methionine biosynthetic process;GO:0009102//biotin biosynthetic process;GO:0009234/…
Mesophyll	SK1G00058381	SK1G00058381-PER1	0.525277	0.389632	23989	15404	0.144	0.117	-0.43087	2.25493085976963e-17	8.30445937035958e-13	down	PER1	XP_015637978.1 peroxidase 5 [Oryza sativa Japonica Group]	Metabolism;Metabolism;Metabolism	Global and overview maps;Global and overview maps;Biosynthesis of other secondary metabolites	ko01100//Metabolic pathways;ko01110//Biosynthesis of secondary metabolites;ko00940//Phenylpropanoid biosynthesis	K00430;K00430;K00430	-	GO:0004096//catalase activity;GO:0004601//peroxidase activity;GO:0020037//heme binding	GO:0006979//response to oxidative stress;GO:0055114//oxidation-reduction process
Mesophyll	SK1G00041766	CKL1	0.26128	0.324473	23989	15404	0.128	0.159	0.312394405727914	2.43242598730653e-17	8.9581384260525e-13	up	CKL1	EEC70925.1 hypothetical protein OsI_02496 [Oryza sativa Indica Group]	-	-	-	-	-	GO:0004672//protein kinase activity;GO:0005524//ATP binding	GO:0006468//protein phosphorylation
Mesophyll	SK1G00047742	SK1G00047742	0.545388	0.441924	23989	15404	0.223	0.191	-0.303424	3.61621364620603e-17	1.33177916162476e-12	down	--	EEC74492.1 hypothetical protein OsI_09962 [Oryza sativa Indica Group]	-	-	-	-	GO:0016021//integral component of membrane	-	GO:0006890//retrograde vesicle-mediated transport, Golgi to ER
Mesophyll	SK1G00060972	SK1G00060972-ADT2	0.221582	0.277463	23989	15404	0.109	0.139	0.324320949614987	3.63416575672785e-17	1.33839056488773e-12	up	ADT2	XP_015646555.1 arogenate dehydratase/prephenate dehydratase 2, chloroplastic [Oryza sativa Japonica Group]	Metabolism;Metabolism;Metabolism;Metabolism	Global and overview maps;Global and overview maps;Global and overview maps;Amino acid metabolism	ko01100//Metabolic pathways;ko01110//Biosynthesis of secondary metabolites;ko01230//Biosynthesis of amino acids;ko00400//Phenylalanine, tyrosine and tryptophan biosynthesis	K05359;K05359;K05359;K05359	GO:0043190//ATP-binding cassette (ABC) transporter complex	GO:0004505//phenylalanine 4-monooxygenase activity;GO:0004510//tryptophan 5-monooxygenase activity;GO:0004664//prephenate dehydratase activity;GO:0042626//ATPase activity, coupled to transmembrane movement of substances	GO:0006559//L-phenylalanine catabolic process;GO:0006568//tryptophan metabolic process;GO:0006810//transport;GO:0009094//L-phenylalanine biosynthetic process
Mesophyll	SK1G00040064	RAB11C	0.49059	0.590106	23989	15404	0.209	0.246	0.266407853413837	3.75620112581865e-17	1.38333375061649e-12	up	RAB11C	XP_015624957.1 ras-related protein Rab2BV [Oryza sativa Japonica Group]	-	-	-	-	GO:0005737//cytoplasm	GO:0003924//GTPase activity;GO:0005524//ATP binding;GO:0005525//GTP binding;GO:0017111//nucleoside-triphosphatase activity;GO:0043022//ribosome binding	GO:0006400//tRNA modification;GO:0006576//cellular biogenic amine metabolic process;GO:0008150//biological_process;GO:0042254//ribosome biogenesis
Mesophyll	SK1G00063427	SK1G00063427-HD6	0.254544	0.317527	23989	15404	0.127	0.158	0.318851256326994	4.132765169976e-17	1.52201475679876e-12	up	HD6	XP_015646887.1 casein kinase II subunit alpha-2 [Oryza sativa Japonica Group]	Genetic Information Processing;Organismal Systems	Translation;Environmental adaptation	ko03008//Ribosome biogenesis in eukaryotes;ko04712//Circadian rhythm - plant	K03097;K03097	-	GO:0004672//protein kinase activity;GO:0005524//ATP binding;GO:0016709//oxidoreductase activity, acting on paired donors, with incorporation or reduction of molecular oxygen, NAD(P)H as one donor, and incorporation of one atom of oxygen	GO:0006468//protein phosphorylation;GO:0006744//ubiquinone biosynthetic process
Mesophyll	SK1G00052230	Os04g0179200	0.647712	0.856558	23989	15404	0.11	0.139	0.403144021977659	4.1696813947888e-17	1.53561026407282e-12	up	Os04g0179200	CAH66124.1 OSIGBa0109M01.2 [Oryza sativa]	Metabolism;Metabolism	Global and overview maps;Metabolism of terpenoids and polyketides	ko01110//Biosynthesis of secondary metabolites;ko00904//Diterpenoid biosynthesis	K13070;K13070	-	GO:0003824//catalytic activity;GO:0004316//3-oxoacyl-[acyl-carrier-protein] reductase (NADPH) activity;GO:0008667//2,3-dihydro-2,3-dihydroxybenzoate dehydrogenase activity;GO:0008678//2-deoxy-D-gluconate 3-dehydrogenase activity;GO:0016491//oxidoreductase activity;GO:0016630//protochlorophyllide reductase activity;GO:0016655//oxidoreductase activity, acting on NAD(P)H, quinone or similar compound…	GO:0000272//polysaccharide catabolic process;GO:0006631//fatty acid metabolic process;GO:0006633//fatty acid biosynthetic process;GO:0008152//metabolic process;GO:0015995//chlorophyll biosynthetic process;GO:0055114//oxidation-reduction process
Mesophyll	SK1G00057980	SK1G00057980	0.331952	0.260365	23989	15404	0.155	0.132	-0.350321	4.35001468647456e-17	1.60202340873485e-12	down	--	EAZ02332.1 hypothetical protein OsI_24435 [Oryza sativa Indica Group]	-	-	-	-	-	GO:0016787//hydrolase activity;GO:0016818//hydrolase activity, acting on acid anhydrides, in phosphorus-containing anhydrides;GO:0017111//nucleoside-triphosphatase activity	GO:0006139//nucleobase-containing compound metabolic process;GO:0006281//DNA repair
Mesophyll	SK1G00056073	SK1G00056073	0.497351	0.406394	23989	15404	0.213	0.183	-0.291319	5.62040557549902e-17	2.06988296534478e-12	down	--	XP_015641199.1 uncharacterized protein LOC4340676 [Oryza sativa Japonica Group]	-	-	-	-	-	-	GO:0006629//lipid metabolic process;GO:0016042//lipid catabolic process
Mesophyll	SK1G00062058	GTE12	0.276702	0.355109	23989	15404	0.129	0.159	0.359813853843179	6.55960737565685e-17	2.4157722043069e-12	up	GTE12	EEC82117.1 hypothetical protein OsI_26141 [Oryza sativa Indica Group]	-	-	-	-	-	GO:0005515//protein binding;GO:0035650//AP-1 adaptor complex binding	GO:0034315//regulation of Arp2/3 complex-mediated actin nucleation;GO:0048203//vesicle targeting, trans-Golgi to endosome;GO:1900025//negative regulation of substrate adhesion-dependent cell spreading;GO:2000146//negative regulation of cell motility
Mesophyll	SK1G00074551	trappc2l	0.316014	0.245607	23989	15404	0.152	0.125	-0.363503	6.56211460264119e-17	2.4166955658607e-12	down	trappc2l	BAC79191.1 hypothetical protein [Oryza sativa Japonica Group]	-	-	-	-	GO:0030008//TRAPP complex	-	GO:0006888//ER to Golgi vesicle-mediated transport;GO:0016192//vesicle-mediated transport
Mesophyll	SK1G00054769	SK1G00054769-CRK25	1.37202	1.1203	23989	15404	0.294	0.259	-0.292392	6.58535247958018e-17	2.42525361117979e-12	down	CRK25	XP_015635326.1 cysteine-rich receptor-like protein kinase 6 [Oryza sativa Japonica Group]	-	-	-	-	-	-	-
Mesophyll	SK1G00041063	LRK10L-1.2	0.400146	0.323433	23989	15404	0.17	0.138	-0.306972	6.70621607647759e-17	2.46976525664517e-12	down	LRK10L-1.2	XP_025875940.1 LEAF RUST 10 DISEASE-RESISTANCE LOCUS RECEPTOR-LIKE PROTEIN KINASE-like 1.2 isoform X4 [Oryza sativa Japonica Group]	-	-	-	-	-	GO:0004672//protein kinase activity;GO:0005524//ATP binding;GO:0030247//polysaccharide binding	GO:0006468//protein phosphorylation;GO:0007218//neuropeptide signaling pathway;GO:0007631//feeding behavior
Mesophyll	SK1G00044761	DHBK	0.229163	0.30199	23989	15404	0.096	0.123	0.397969796492861	6.96597737855926e-17	2.5654301489758e-12	up	DHBK	XP_015632863.1 putative 3,4-dihydroxy-2-butanone kinase [Oryza sativa Japonica Group]	-	-	-	-	-	GO:0004371//glycerone kinase activity	GO:0006071//glycerol metabolic process
Mesophyll	SK1G00051993	RS31	0.202824	0.254377	23989	15404	0.1	0.127	0.326596368612547	7.41920436386454e-17	2.73234458312403e-12	up	RS31	XP_015633436.1 serine/arginine-rich splicing factor RS31 isoform X1 [Oryza sativa Japonica Group]	Genetic Information Processing	Transcription	ko03040//Spliceosome	K12893	GO:0005634//nucleus;GO:0005737//cytoplasm	GO:0003676//nucleic acid binding;GO:0003723//RNA binding;GO:0004535//poly(A)-specific ribonuclease activity;GO:0046872//metal ion binding	GO:0006402//mRNA catabolic process;GO:0008380//RNA splicing
Mesophyll	SK1G00043576	SK1G00043576-H2B.10	0.429164	0.561936	23989	15404	0.175	0.199	0.388798619392549	7.42318763247607e-17	2.73381154128829e-12	up	H2B.10	XP_020200377.1 histone H2B.3-like [Aegilops tauschii subsp. tauschii] [Aegilops tauschii]	-	-	-	-	GO:0005669//transcription factor TFIID complex	GO:0003677//DNA binding	GO:0006352//DNA-templated transcription, initiation
Mesophyll	SK1G00074337	SK1G00074337-HMG3	0.668268	0.802807	23989	15404	0.213	0.249	0.264590093233081	9.13917252243638e-17	3.36577445656287e-12	up	HMG3	XP_015612324.1 3-hydroxy-3-methylglutaryl-coenzyme A reductase 3-like [Oryza sativa Japonica Group]	Metabolism;Metabolism;Metabolism	Global and overview maps;Global and overview maps;Metabolism of terpenoids and polyketides	ko01100//Metabolic pathways;ko01110//Biosynthesis of secondary metabolites;ko00900//Terpenoid backbone biosynthesis	K00021;K00021;K00021	GO:0005576//extracellular region;GO:0042600//chorion	GO:0004420//hydroxymethylglutaryl-CoA reductase (NADPH) activity;GO:0005213//structural constituent of chorion	GO:0007304//chorion-containing eggshell formation;GO:0008299//isoprenoid biosynthetic process;GO:0015936//coenzyme A metabolic process;GO:0016054//organic acid catabolic process;GO:0055114//oxidation-reduction process
Mesophyll	SK1G00040457	PBP1	0.250703	0.332924	23989	15404	0.097	0.124	0.409074270365052	9.32598914298557e-17	3.43457528157873e-12	up	PBP1	EAY76075.1 hypothetical protein OsI_04003 [Oryza sativa Indica Group]	-	-	-	-	-	GO:0005509//calcium ion binding;GO:0005515//protein binding	-
Mesophyll	SK1G00055234	SK1G00055234	2.27607	2.74694	23989	15404	0.28	0.319	0.27127217270549	1.09019631770538e-16	4.01497499884538e-12	up	--	KAB8101051.1 hypothetical protein EE612_031720 [Oryza sativa]	-	-	-	-	GO:0000786//nucleosome	GO:0003677//DNA binding	GO:0006334//nucleosome assembly
Mesophyll	SK1G00070230	MT4A	1.6858	1.17641	23989	15404	0.173	0.145	-0.519	1.2110286862306e-16	4.45997644565004e-12	down	MT4A	Q0IMG5.1 RecName: Full=Metallothionein-like protein 4A; AltName: Full=Class I metallothionein-like protein 4A; AltName: Full=OsMT-I-4a; AltName: Full=OsMT1b [Oryza sativa Japonica Group]	-	-	-	-	-	GO:0008270//zinc ion binding;GO:0046872//metal ion binding	-
Mesophyll	SK1G00058450	PDIL2-1	0.179141	0.229645	23989	15404	0.091	0.118	0.358126879081635	1.22105184452763e-16	4.49688973302634e-12	up	PDIL2-1	XP_015640374.1 protein disulfide isomerase-like 2-1 isoform X1 [Oryza sativa Japonica Group]	Genetic Information Processing	Folding, sorting and degradation	ko04141//Protein processing in endoplasmic reticulum	K09584	GO:0005634//nucleus;GO:0005737//cytoplasm;GO:0005783//endoplasmic reticulum	GO:0003756//protein disulfide isomerase activity;GO:0015036//disulfide oxidoreductase activity;GO:0016209//antioxidant activity;GO:0016491//oxidoreductase activity;GO:0016667//oxidoreductase activity, acting on a sulfur group of donors	GO:0006457//protein folding;GO:0006790//sulfur compound metabolic process;GO:0055114//oxidation-reduction process
Mesophyll	SK1G00058092	TFIIAy	0.197299	0.251437	23989	15404	0.094	0.121	0.349657015322814	1.26705920270378e-16	4.66632563171747e-12	up	TFIIAy	XP_015640634.1 transcription initiation factor IIA subunit 2 [Oryza sativa Japonica Group]	Genetic Information Processing	Transcription	ko03022//Basal transcription factors	K03123	GO:0005672//transcription factor TFIIA complex	-	GO:0006367//transcription initiation from RNA polymerase II promoter
Mesophyll	SK1G00074854	SK1G00074854-BSK3	0.308443	0.37454	23989	15404	0.148	0.181	0.280032092829231	1.72652832170755e-16	6.35845850318456e-12	up	BSK3	B9FDE0.1 RecName: Full=Probable serine/threonine-protein kinase BSK3; AltName: Full=Brassinosteroid-signaling kinase 3; Short=OsBSK3; AltName: Full=Receptor-like cytoplasmic kinase 173; Short=OsRLCK173 [Oryza sativa Japonica Group]	Environmental Information Processing	Signal transduction	ko04075//Plant hormone signal transduction	K14500	-	GO:0004672//protein kinase activity;GO:0005515//protein binding;GO:0005524//ATP binding	GO:0006468//protein phosphorylation
Mesophyll	SK1G00057375	SK1G00057375	0.599645	0.722284	23989	15404	0.225	0.261	0.268417754062022	2.07737370615753e-16	7.65055188503694e-12	up	--	EEC81003.1 hypothetical protein OsI_23761 [Oryza sativa Indica Group]	-	-	-	-	-	-	-
Mesophyll	SK1G00071354	SK1G00071354-YLS8	0.328055	0.394889	23989	15404	0.159	0.193	0.267436869965066	2.15932049461317e-16	7.95234551756137e-12	up	YLS8	EEC67208.1 hypothetical protein OsI_34094 [Oryza sativa Indica Group]	Genetic Information Processing	Transcription	ko03040//Spliceosome	K12859	GO:0005737//cytoplasm;GO:0046540//U4/U6 x U5 tri-snRNP complex	GO:0003756//protein disulfide isomerase activity;GO:0015036//disulfide oxidoreductase activity	GO:0000398//mRNA splicing, via spliceosome;GO:0006457//protein folding;GO:0055114//oxidation-reduction process
Mesophyll	SK1G00061970	SK1G00061970-Os07g0271500	3.26781	2.71192	23989	15404	0.391	0.382	-0.269001	2.56437708662661e-16	9.44408793462848e-12	down	Os07g0271500	EAZ04123.1 hypothetical protein OsI_26269 [Oryza sativa Indica Group]	-	-	-	-	GO:0016020//membrane	GO:0004315//3-oxoacyl-[acyl-carrier-protein] synthase activity;GO:0004421//hydroxymethylglutaryl-CoA synthase activity;GO:0016747//transferase activity, transferring acyl groups other than amino-acyl groups	GO:0006633//fatty acid biosynthetic process
Mesophyll	SK1G00054343	DLO1	2.12039	1.68107	23989	15404	0.202	0.169	-0.334925	3.09728424245079e-16	1.14066784080978e-11	down	DLO1	CAH67943.1 H0303A11-B0406H05.3 [Oryza sativa]	-	-	-	-	-	GO:0016491//oxidoreductase activity	GO:0055114//oxidation-reduction process
Mesophyll	SK1G00051019	ARPC3	0.235918	0.296878	23989	15404	0.114	0.144	0.33146119833851	3.34413697776936e-16	1.2315787661729e-11	up	ARPC3	XP_015626361.1 actin-related protein 2/3 complex subunit 3 isoform X1 [Oryza sativa Japonica Group]	Cellular Processes	Transport and catabolism	ko04144//Endocytosis	K05756	GO:0005856//cytoskeleton;GO:0005885//Arp2/3 protein complex	-	GO:0030833//regulation of actin filament polymerization;GO:0034314//Arp2/3 complex-mediated actin nucleation
Mesophyll	SK1G00051797	SK1G00051797-BRR2A	0.424657	0.511191	23989	15404	0.178	0.212	0.267507462828022	3.51443285788503e-16	1.2942953329019e-11	up	BRR2A	EAY84119.1 hypothetical protein OsI_05501 [Oryza sativa Indica Group]	Genetic Information Processing	Transcription	ko03040//Spliceosome	K12854	-	GO:0003676//nucleic acid binding;GO:0003677//DNA binding;GO:0003678//DNA helicase activity;GO:0003690//double-stranded DNA binding;GO:0004003//ATP-dependent DNA helicase activity;GO:0004386//helicase activity;GO:0005515//protein binding;GO:0005524//ATP binding;GO:0008026//ATP-dependent helicase activity;GO:0008565//protein transporter activity;GO:0016301//kinase activity;GO:0016787//hydrolase act…	GO:0006139//nucleobase-containing compound metabolic process;GO:0006268//DNA unwinding involved in DNA replication;GO:0006281//DNA repair;GO:0006310//DNA recombination;GO:0009297//pilus assembly;GO:0043571//maintenance of CRISPR repeat elements
Mesophyll	SK1G00057435	TMN9	0.319952	0.254431	23989	15404	0.151	0.121	-0.330465	5.76104668227566e-16	2.12167827214848e-11	down	TMN9	EEC81091.1 hypothetical protein OsI_23922 [Oryza sativa Indica Group]	-	-	-	-	GO:0016021//integral component of membrane	GO:0022857//transmembrane transporter activity	GO:0055085//transmembrane transport
Mesophyll	SK1G00073679	SK1G00073679	0.184211	0.24087	23989	15404	0.088	0.114	0.386709870990566	6.16440866022906e-16	2.27022842138916e-11	up	--	BAH94549.1 Os09g0392666, partial [Oryza sativa Japonica Group]	-	-	-	-	-	-	-
Mesophyll	SK1G00040124	ZAT5	0.491093	0.390365	23989	15404	0.188	0.162	-0.331099	6.76590523884785e-16	2.49174758136289e-11	down	ZAT5	EAY76430.1 hypothetical protein OsI_04363 [Oryza sativa Indica Group]	-	-	-	-	-	-	GO:0006351//transcription, DNA-templated
Mesophyll	SK1G00054576	LCAT4	0.289741	0.356565	23989	15404	0.128	0.157	0.299309215934479	1.22661090432889e-15	4.51736263846245e-11	up	LCAT4	XP_015636267.1 lecithin-cholesterol acyltransferase-like 4 [Oryza sativa Japonica Group]	Metabolism;Metabolism;Metabolism;Metabolism	Global and overview maps;Global and overview maps;Lipid metabolism;Lipid metabolism	ko01100//Metabolic pathways;ko01110//Biosynthesis of secondary metabolites;ko00564//Glycerophospholipid metabolism;ko00592//alpha-Linolenic acid metabolism	K22389;K22389;K22389;K22389	-	GO:0008374//O-acyltransferase activity;GO:0016787//hydrolase activity;GO:0016788//hydrolase activity, acting on ester bonds	GO:0006629//lipid metabolic process;GO:0016042//lipid catabolic process
Mesophyll	SK1G00069921	SK1G00069921-UBP13	0.176524	0.228768	23989	15404	0.089	0.114	0.373833224178121	1.57980703251737e-15	5.81811333935498e-11	up	UBP13	XP_015620101.1 ubiquitin carboxyl-terminal hydrolase 12 isoform X2 [Oryza sativa Japonica Group]	-	-	-	-	-	GO:0004843//thiol-dependent ubiquitin-specific protease activity;GO:0005515//protein binding	GO:0007165//signal transduction;GO:0016579//protein deubiquitination
Mesophyll	SK1G00067882	SK1G00067882-MAPKKK3	0.16992	0.214421	23989	15404	0.086	0.111	0.335414651231079	1.97538892525412e-15	7.27496233392587e-11	up	MAPKKK3	XP_015617106.1 mitogen-activated protein kinase kinase kinase 3 [Oryza sativa Japonica Group]	-	-	-	-	-	GO:0004672//protein kinase activity;GO:0005524//ATP binding;GO:0016709//oxidoreductase activity, acting on paired donors, with incorporation or reduction of molecular oxygen, NAD(P)H as one donor, and incorporation of one atom of oxygen	GO:0006468//protein phosphorylation;GO:0006744//ubiquinone biosynthetic process
Mesophyll	SK1G00063263	SK1G00063263-UBP13	0.16421	0.214204	23989	15404	0.084	0.109	0.383236187532426	2.02311617279445e-15	7.45073224116741e-11	up	UBP13	XP_015647294.1 ubiquitin carboxyl-terminal hydrolase 12 isoform X2 [Oryza sativa Japonica Group]	-	-	-	-	-	GO:0004843//thiol-dependent ubiquitin-specific protease activity;GO:0005515//protein binding	GO:0007165//signal transduction;GO:0016579//protein deubiquitination
Mesophyll	SK1G00065636	ACBP1	0.165303	0.204882	23989	15404	0.081	0.105	0.309514361240768	2.13057884662122e-15	7.84649577633663e-11	up	ACBP1	XP_015648168.1 acyl-CoA-binding domain-containing protein 1-like [Oryza sativa Japonica Group]	-	-	-	-	-	GO:0000062//fatty-acyl-CoA binding	-
Mesophyll	SK1G00048881	Tbc1d15	0.619819	0.51269	23989	15404	0.251	0.217	-0.273712	2.29718804648604e-15	8.46008413759877e-11	down	Tbc1d15	XP_015626694.1 TBC1 domain family member 15 [Oryza sativa Japonica Group]	-	-	-	-	-	-	-
Mesophyll	SK1G00045905	XDH	0.378428	0.461351	23989	15404	0.175	0.208	0.285778915711334	2.49776165731001e-15	9.19875663154129e-11	up	XDH	XP_015630851.1 xanthine dehydrogenase isoform X1 [Oryza sativa Japonica Group]	Metabolism;Metabolism;Metabolism;Cellular Processes;Metabolism	Global and overview maps;Global and overview maps;Nucleotide metabolism;Transport and catabolism;Biosynthesis of other secondary metabolites	ko01100//Metabolic pathways;ko01110//Biosynthesis of secondary metabolites;ko00230//Purine metabolism;ko04146//Peroxisome;ko00232//Caffeine metabolism	K00106;K00106;K00106;K00106;K00106	-	GO:0004854//xanthine dehydrogenase activity;GO:0009055//electron carrier activity;GO:0016491//oxidoreductase activity;GO:0043546//molybdopterin cofactor binding;GO:0046872//metal ion binding;GO:0051536//iron-sulfur cluster binding	GO:0009115//xanthine catabolic process;GO:0046415//urate metabolic process;GO:0055114//oxidation-reduction process
Mesophyll	SK1G00060368	IAA18	0.291418	0.354383	23989	15404	0.106	0.133	0.282132160649928	2.61025851574763e-15	9.61306006179536e-11	up	IAA18	XP_015640491.1 auxin-responsive protein IAA18 isoform X2 [Oryza sativa Japonica Group]	Environmental Information Processing	Signal transduction	ko04075//Plant hormone signal transduction	K14484	-	-	-
Mesophyll	SK1G00040477	CHR28	0.420816	0.509523	23989	15404	0.195	0.228	0.275899471431304	2.71935403772009e-15	1.00148370501156e-10	up	CHR28	XP_015616228.1 helicase-like transcription factor CHR28 isoform X1 [Oryza sativa Japonica Group]	-	-	-	-	GO:0000109//nucleotide-excision repair complex	GO:0008270//zinc ion binding;GO:0046872//metal ion binding	GO:0006289//nucleotide-excision repair
Mesophyll	SK1G00054579	SK1G00054579	0.498334	0.632422	23989	15404	0.148	0.178	0.343713751684561	3.04941575211019e-15	1.12303883318714e-10	up	--	XP_015635616.1 myosin-10 isoform X2 [Oryza sativa Japonica Group]	-	-	-	-	-	GO:0005524//ATP binding	GO:0007059//chromosome segregation;GO:0030261//chromosome condensation
Mesophyll	SK1G00058444	NRPE7	0.180581	0.236581	23989	15404	0.085	0.11	0.389498051027989	3.15802205287447e-15	1.16303636163261e-10	up	NRPE7	XP_015639920.1 DNA-directed RNA polymerase V subunit 7 [Oryza sativa Japonica Group]	-	-	-	-	-	GO:0003899//DNA-directed RNA polymerase activity	GO:0006351//transcription, DNA-templated
Mesophyll	SK1G00050075	GILP	0.225638	0.279461	23989	15404	0.116	0.144	0.308514439237413	3.75273430591194e-15	1.38205699018125e-10	up	GILP	XP_015622920.1 GSH-induced LITAF domain protein isoform X2 [Oryza sativa Japonica Group]	-	-	-	-	-	GO:0005506//iron ion binding;GO:0008270//zinc ion binding	-
Mesophyll	SK1G00068262	SK1G00068262-FFC	0.352989	0.426303	23989	15404	0.156	0.188	0.272185530670366	4.14575756107527e-15	1.5267995945928e-10	up	FFC	EEC67692.1 hypothetical protein OsI_35151 [Oryza sativa Indica Group]	Genetic Information Processing	Folding, sorting and degradation	ko03060//Protein export	K03106	GO:0005575//cellular_component;GO:0005786//signal recognition particle, endoplasmic reticulum targeting;GO:0048500//signal recognition particle;GO:0048501//signal recognition particle, plasma membrane targeting	GO:0003674//molecular_function;GO:0003677//DNA binding;GO:0003700//transcription factor activity, sequence-specific DNA binding;GO:0003723//RNA binding;GO:0003724//RNA helicase activity;GO:0003873//6-phosphofructo-2-kinase activity;GO:0003924//GTPase activity;GO:0004020//adenylylsulfate kinase activity;GO:0005047//signal recognition particle binding;GO:0005048//signal sequence binding;GO:0005524/…	GO:0000918//barrier septum site selection;GO:0006000//fructose metabolic process;GO:0006355//regulation of transcription, DNA-templated;GO:0006614//SRP-dependent cotranslational protein targeting to membrane;GO:0006617//SRP-dependent cotranslational protein targeting to membrane, signal sequence recognition;GO:0006790//sulfur compound metabolic process;GO:0009306//protein secretion;GO:0015809//ar…
Mesophyll	SK1G00044039	RABA2A	0.294308	0.227159	23989	15404	0.129	0.106	-0.373479	4.6104308115486e-15	1.69792945927712e-10	down	RABA2A	XP_015629707.1 ras-related protein RABA2a [Oryza sativa Japonica Group]	Cellular Processes	Transport and catabolism	ko04144//Endocytosis	K07904	GO:0005737//cytoplasm	GO:0003677//DNA binding;GO:0003924//GTPase activity;GO:0005524//ATP binding;GO:0005525//GTP binding;GO:0016887//ATPase activity;GO:0017111//nucleoside-triphosphatase activity;GO:0019843//rRNA binding;GO:0043022//ribosome binding;GO:0051539//4 iron, 4 sulfur cluster binding	GO:0006400//tRNA modification;GO:0006576//cellular biogenic amine metabolic process;GO:0008150//biological_process;GO:0032508//DNA duplex unwinding;GO:0042254//ribosome biogenesis;GO:0046336//ethanolamine catabolic process;GO:0051186//cofactor metabolic process
Mesophyll	SK1G00052578	SK1G00052578-Gspt1	0.319975	0.385217	23989	15404	0.149	0.179	0.267635099838195	4.6347474106423e-15	1.70688477639135e-10	up	Gspt1	EEC76905.1 hypothetical protein OsI_15137 [Oryza sativa Indica Group]	Genetic Information Processing	Translation	ko03015//mRNA surveillance pathway	K03267	GO:0005737//cytoplasm;GO:0005887//integral component of plasma membrane;GO:0055051//ATP-binding cassette (ABC) transporter complex, integrated substrate binding	GO:0003743//translation initiation factor activity;GO:0003746//translation elongation factor activity;GO:0003747//translation release factor activity;GO:0003924//GTPase activity;GO:0004781//sulfate adenylyltransferase (ATP) activity;GO:0005524//ATP binding;GO:0005525//GTP binding;GO:0019001//guanyl nucleotide binding;GO:0031683//G-protein beta/gamma-subunit complex binding;GO:0033230//cysteine-tr…	GO:0000103//sulfate assimilation;GO:0001514//selenocysteine incorporation;GO:0006412//translation;GO:0006413//translational initiation;GO:0006414//translational elongation;GO:0006415//translational termination;GO:0006950//response to stress;GO:0007186//G-protein coupled receptor signaling pathway;GO:0033228//cysteine export;GO:0042254//ribosome biogenesis
Mesophyll	SK1G00062500	SPDSYN1	0.200227	0.245453	23989	15404	0.095	0.12	0.293679307806522	4.65440463817308e-15	1.71412414014638e-10	up	SPDSYN1	EEC81895.1 hypothetical protein OsI_25717 [Oryza sativa Indica Group]	Metabolism;Metabolism;Metabolism;Metabolism	Global and overview maps;Amino acid metabolism;Metabolism of other amino acids;Amino acid metabolism	ko01100//Metabolic pathways;ko00270//Cysteine and methionine metabolism;ko00480//Glutathione metabolism;ko00330//Arginine and proline metabolism	K00797;K00797;K00797;K00797	-	GO:0004766//spermidine synthase activity;GO:0005515//protein binding;GO:0008168//methyltransferase activity;GO:0016645//oxidoreductase activity, acting on the CH-NH group of donors	GO:0008295//spermidine biosynthetic process;GO:0055114//oxidation-reduction process
Mesophyll	SK1G00051391	BTAF1	0.18016	0.230599	23989	15404	0.089	0.115	0.355926330459734	5.22119424268992e-15	1.92286141569784e-10	up	BTAF1	KAF2943201.1 hypothetical protein DAI22_02g048900 [Oryza sativa Japonica Group]	-	-	-	-	-	GO:0003676//nucleic acid binding;GO:0003677//DNA binding;GO:0003690//double-stranded DNA binding;GO:0005515//protein binding;GO:0005524//ATP binding;GO:0016787//hydrolase activity;GO:0016887//ATPase activity	GO:0006281//DNA repair
Mesophyll	SK1G00074506	SK1G00074506-At5g02620	0.217069	0.274433	23989	15404	0.098	0.124	0.33816014983373	5.56574088406364e-15	2.04975105278296e-10	up	At5g02620	EAZ09775.1 hypothetical protein OsI_32062 [Oryza sativa Indica Group]	-	-	-	-	GO:0005643//nuclear pore;GO:0016021//integral component of membrane	GO:0005515//protein binding	GO:0016973//poly(A)+ mRNA export from nucleus;GO:0055085//transmembrane transport
Mesophyll	SK1G00046072	SK1G00046072	0.163229	0.212117	23989	15404	0.079	0.103	0.377755636122089	5.59727275638654e-15	2.06136361072203e-10	up	--	EEC75374.1 hypothetical protein OsI_11837 [Oryza sativa Indica Group]	-	-	-	-	-	-	-
Mesophyll	SK1G00041855	AIP2	0.349354	0.422312	23989	15404	0.165	0.197	0.273546489904323	5.83833164229664e-15	2.15014077722501e-10	up	AIP2	XP_015621815.1 DEAD-box ATP-dependent RNA helicase 15 isoform X1 [Oryza sativa Japonica Group]	Genetic Information Processing;Genetic Information Processing;Genetic Information Processing	Transcription;Translation;Translation	ko03040//Spliceosome;ko03013//RNA transport;ko03015//mRNA surveillance pathway	K12812;K12812;K12812	GO:0009380//excinuclease repair complex	GO:0003676//nucleic acid binding;GO:0003677//DNA binding;GO:0003690//double-stranded DNA binding;GO:0004003//ATP-dependent DNA helicase activity;GO:0004386//helicase activity;GO:0005515//protein binding;GO:0005524//ATP binding;GO:0008026//ATP-dependent helicase activity;GO:0009381//excinuclease ABC activity;GO:0016787//hydrolase activity;GO:0016887//ATPase activity	GO:0006139//nucleobase-containing compound metabolic process;GO:0006268//DNA unwinding involved in DNA replication;GO:0006281//DNA repair;GO:0006289//nucleotide-excision repair;GO:0006310//DNA recombination;GO:0043571//maintenance of CRISPR repeat elements
Mesophyll	SK1G00053609	SK1G00053609-PHB3	0.29581	0.361191	23989	15404	0.141	0.171	0.288003013850738	5.8413028120609e-15	2.15123499962579e-10	up	PHB3	CAH67633.1 B0812A04.3 [Oryza sativa]	-	-	-	-	-	-	-
Mesophyll	SK1G00057203	SK1G00057203-XA21	0.166582	0.225183	23989	15404	0.081	0.105	0.434639980445538	6.04021662723184e-15	2.22449097947694e-10	up	XA21	XP_015642844.1 receptor kinase-like protein Xa21 isoform X1 [Oryza sativa Japonica Group]	-	-	-	-	-	GO:0004413//homoserine kinase activity;GO:0004672//protein kinase activity;GO:0005515//protein binding;GO:0005524//ATP binding	GO:0006468//protein phosphorylation;GO:0009088//threonine biosynthetic process
Mesophyll	SK1G00054181	SK1G00054181-OsI_16820	0.602144	0.491408	23989	15404	0.21	0.19	-0.293135	9.00583855465807e-15	3.31667022290947e-10	down	OsI_16820	XP_015634281.1 probable receptor-like protein kinase At1g33260 [Oryza sativa Japonica Group]	-	-	-	-	-	GO:0004672//protein kinase activity;GO:0005524//ATP binding	GO:0006468//protein phosphorylation
Mesophyll	SK1G00058882	SK1G00058882-DAAT	0.37981	0.456816	23989	15404	0.161	0.193	0.266269284373764	9.03605053054174e-15	3.32779668938791e-10	up	DAAT	AAV43971.1 putative aminotransferase [Oryza sativa Japonica Group]	Metabolism	Metabolism of cofactors and vitamins	ko00790//Folate biosynthesis	K18482	-	GO:0003824//catalytic activity;GO:0004084//branched-chain-amino-acid transaminase activity;GO:0008696//4-amino-4-deoxychorismate lyase activity;GO:0047810//D-alanine:2-oxoglutarate aminotransferase activity	GO:0008153//para-aminobenzoic acid biosynthetic process;GO:0009082//branched-chain amino acid biosynthetic process;GO:0009396//folic acid-containing compound biosynthetic process;GO:0019480//L-alanine oxidation to pyruvate via D-alanine
Mesophyll	SK1G00055511	YDL109C	0.320357	0.260115	23989	15404	0.146	0.118	-0.300427	9.31767003903719e-15	3.43151152197662e-10	down	YDL109C	XP_015643190.1 putative lipase YDR444W isoform X1 [Oryza sativa Japonica Group]	-	-	-	-	-	-	-
Mesophyll	SK1G00070516	Os12g0611200	0.215078	0.262209	23989	15404	0.101	0.126	0.285733843544211	1.01367657882909e-14	3.73316810451179e-10	up	Os12g0611200	XP_015620393.1 DEAD-box ATP-dependent RNA helicase 9 [Oryza sativa Japonica Group]	-	-	-	-	GO:0005658//alpha DNA polymerase:primase complex;GO:0009380//excinuclease repair complex	GO:0003676//nucleic acid binding;GO:0003677//DNA binding;GO:0003678//DNA helicase activity;GO:0003688//DNA replication origin binding;GO:0003690//double-stranded DNA binding;GO:0003916//DNA topoisomerase activity;GO:0003917//DNA topoisomerase type I activity;GO:0004003//ATP-dependent DNA helicase activity;GO:0004386//helicase activity;GO:0004637//phosphoribosylamine-glycine ligase activity;GO:000…	GO:0006139//nucleobase-containing compound metabolic process;GO:0006260//DNA replication;GO:0006265//DNA topological change;GO:0006268//DNA unwinding involved in DNA replication;GO:0006281//DNA repair;GO:0006289//nucleotide-excision repair;GO:0006310//DNA recombination;GO:0009113//purine nucleobase biosynthetic process;GO:0043571//maintenance of CRISPR repeat elements
Mesophyll	SK1G00068913	SK1G00068913	0.241142	0.303038	23989	15404	0.119	0.147	0.329491677875352	1.03635477442e-14	3.81668736323396e-10	up	--	XP_015618453.1 uncharacterized protein LOC4351484 [Oryza sativa Japonica Group]	-	-	-	-	-	GO:0003676//nucleic acid binding;GO:0016903//oxidoreductase activity, acting on the aldehyde or oxo group of donors	GO:0055114//oxidation-reduction process
Mesophyll	SK1G00049464	SK1G00049464	0.721615	0.890807	23989	15404	0.182	0.214	0.303846268177378	1.15127924662712e-14	4.23993120947836e-10	up	--	-	-	-	-	-	-	-	-
Mesophyll	SK1G00043296	HSP18.0	0.632707	0.509712	23989	15404	0.196	0.166	-0.3118	1.17936227413914e-14	4.34335538319963e-10	down	HSP18.0	Q5VRY1.1 RecName: Full=18.0 kDa class II heat shock protein; AltName: Full=18.0 kDa heat shock protein; Short=OsHsp18.0 [Oryza sativa Japonica Group]	Genetic Information Processing	Folding, sorting and degradation	ko04141//Protein processing in endoplasmic reticulum	K13993	-	-	-
Mesophyll	SK1G00047885	CIPK9	0.345499	0.42197	23989	15404	0.155	0.186	0.288381175301319	1.23636653856935e-14	4.55329068824322e-10	up	CIPK9	EEC74432.1 hypothetical protein OsI_09813 [Oryza sativa Indica Group]	-	-	-	-	-	GO:0004672//protein kinase activity;GO:0005524//ATP binding;GO:0016709//oxidoreductase activity, acting on paired donors, with incorporation or reduction of molecular oxygen, NAD(P)H as one donor, and incorporation of one atom of oxygen	GO:0006468//protein phosphorylation;GO:0006744//ubiquinone biosynthetic process;GO:0007165//signal transduction
Mesophyll	SK1G00074858	SK1G00074858-UEV1C	0.580348	0.698983	23989	15404	0.192	0.225	0.26829598808853	1.25307302353236e-14	4.61481733106498e-10	up	UEV1C	XP_015635907.1 ubiquitin-conjugating enzyme E2 variant 1C isoform X1 [Oryza sativa Japonica Group]	-	-	-	-	-	GO:0005515//protein binding	-
Mesophyll	SK1G00039606	SK1G00039606	0.369493	0.29451	23989	15404	0.162	0.136	-0.327131	1.25870904284804e-14	4.63557366300076e-10	down	--	EEC72047.1 hypothetical protein OsI_04953 [Oryza sativa Indica Group]	-	-	-	-	-	-	-
Mesophyll	SK1G00066243	SK1G00066243	0.374815	0.462336	23989	15404	0.166	0.194	0.302690148325678	1.35977529510327e-14	5.00778045680633e-10	up	--	-	-	-	-	-	-	-	-
Mesophyll	SK1G00044619	SK1G00044619-AZF2	0.375307	0.302786	23989	15404	0.169	0.146	-0.30968	1.39743210514984e-14	5.14646295684581e-10	down	AZF2	XP_015633313.1 zinc finger protein 1 [Oryza sativa Japonica Group]	-	-	-	-	-	-	-
Mesophyll	SK1G00058098	SK1G00058098-AC97	0.396884	0.477861	23989	15404	0.188	0.221	0.267812714597269	1.52982824464241e-14	5.63405145936907e-10	up	AC97	EEE62039.1 hypothetical protein OsJ_16821 [Oryza sativa Japonica Group]	-	-	-	-	-	-	-
Mesophyll	SK1G00060661	SK1G00060661-CPRF1	0.322943	0.392297	23989	15404	0.138	0.168	0.280587787593025	1.70341321807111e-14	6.27333019951227e-10	up	CPRF1	EAY99081.1 hypothetical protein OsI_21038 [Oryza sativa Indica Group]	-	-	-	-	-	GO:0003677//DNA binding;GO:0003700//transcription factor activity, sequence-specific DNA binding;GO:0043565//sequence-specific DNA binding	GO:0006260//DNA replication;GO:0006355//regulation of transcription, DNA-templated
Mesophyll	SK1G00067748	SK1G00067748-At2g44130	0.314004	0.377751	23989	15404	0.099	0.124	0.266575235517489	1.71360747519228e-14	6.31087360963812e-10	up	At2g44130	EAY80505.1 hypothetical protein OsI_35683 [Oryza sativa Indica Group]	-	-	-	-	-	GO:0005515//protein binding	-
Mesophyll	SK1G00071740	SK1G00071740-P4H7	0.355996	0.442189	23989	15404	0.161	0.19	0.312724230206841	1.90936739376461e-14	7.03181823775629e-10	up	P4H7	EEC66934.1 hypothetical protein OsI_33548 [Oryza sativa Indica Group]	Metabolism;Metabolism	Global and overview maps;Amino acid metabolism	ko01100//Metabolic pathways;ko00330//Arginine and proline metabolism	K00472;K00472	-	GO:0016491//oxidoreductase activity	GO:0055114//oxidation-reduction process
Mesophyll	SK1G00041782	CCD8A	0.3316	0.408292	23989	15404	0.102	0.128	0.300076810393624	2.1685593800842e-14	7.98637048497408e-10	up	CCD8A	EEC70915.1 hypothetical protein OsI_02474 [Oryza sativa Indica Group]	Metabolism;Metabolism	Global and overview maps;Metabolism of terpenoids and polyketides	ko01110//Biosynthesis of secondary metabolites;ko00906//Carotenoid biosynthesis	K17913;K17913	-	GO:0016702//oxidoreductase activity, acting on single donors with incorporation of molecular oxygen, incorporation of two atoms of oxygen	GO:0055114//oxidation-reduction process
Mesophyll	SK1G00055588	SK1G00055588-PKL	0.348202	0.421214	23989	15404	0.155	0.185	0.274559442595297	2.47608257776945e-14	9.11891691740934e-10	up	PKL	XP_015643095.1 CHD3-type chromatin-remodeling factor PICKLE [Oryza sativa Japonica Group]	-	-	-	-	GO:0005680//anaphase-promoting complex;GO:0070823//HDA1 complex	GO:0003677//DNA binding;GO:0005524//ATP binding;GO:0008270//zinc ion binding;GO:0016787//hydrolase activity;GO:0017111//nucleoside-triphosphatase activity;GO:0061630//ubiquitin protein ligase activity;GO:0097602//cullin family protein binding	GO:0006351//transcription, DNA-templated;GO:0016575//histone deacetylation;GO:0031145//anaphase-promoting complex-dependent proteasomal ubiquitin-dependent protein catabolic process
Mesophyll	SK1G00040309	RER3	0.418215	0.343838	23989	15404	0.186	0.159	-0.28244	2.85391673744307e-14	1.05104045606553e-09	down	RER3	EEC71687.1 hypothetical protein OsI_04178 [Oryza sativa Indica Group]	-	-	-	-	-	-	-
Mesophyll	SK1G00072887	SK1G00072887-CCR1	3.42675	2.81079	23989	15404	0.337	0.307	-0.285859	3.75137225694934e-14	1.3815553747893e-09	down	CCR1	EAZ08185.1 hypothetical protein OsI_30445 [Oryza sativa Indica Group]	Metabolism;Metabolism;Metabolism	Global and overview maps;Global and overview maps;Biosynthesis of other secondary metabolites	ko01100//Metabolic pathways;ko01110//Biosynthesis of secondary metabolites;ko00940//Phenylpropanoid biosynthesis	K09753;K09753;K09753	-	GO:0003824//catalytic activity;GO:0003854//3-beta-hydroxy-delta5-steroid dehydrogenase activity;GO:0003978//UDP-glucose 4-epimerase activity;GO:0008712//ADP-glyceromanno-heptose 6-epimerase activity;GO:0016616//oxidoreductase activity, acting on the CH-OH group of donors, NAD or NADP as acceptor;GO:0016757//transferase activity, transferring glycosyl groups;GO:0047733//CDP-glucose 4,6-dehydratase…	GO:0005975//carbohydrate metabolic process;GO:0006012//galactose metabolic process;GO:0006694//steroid biosynthetic process;GO:0009243//O antigen biosynthetic process;GO:0009244//lipopolysaccharide core region biosynthetic process;GO:0055114//oxidation-reduction process
Mesophyll	SK1G00050547	API5	0.207024	0.251379	23989	15404	0.1	0.124	0.279944071764741	4.16592978959942e-14	1.53422862291367e-09	up	API5	EAY85554.1 hypothetical protein OsI_06927 [Oryza sativa Indica Group]	-	-	-	-	-	-	-
Mesophyll	SK1G00055120	CPN60B1	0.41871	0.508028	23989	15404	0.181	0.213	0.278895626188307	4.2011485858009e-14	1.54719900117875e-09	up	CPN60B1	XP_015642765.1 ruBisCO large subunit-binding protein subunit beta, chloroplastic [Oryza sativa Japonica Group]	Genetic Information Processing	Folding, sorting and degradation	ko03018//RNA degradation	K04077	-	GO:0005515//protein binding;GO:0005524//ATP binding;GO:0016887//ATPase activity	GO:0006457//protein folding
Mesophyll	SK1G00072904	SK1G00072904	0.371618	0.299086	23989	15404	0.131	0.105	-0.313164	4.60397860542579e-14	1.69555324080621e-09	down	--	EAZ08195.1 hypothetical protein OsI_30455 [Oryza sativa Indica Group]	-	-	-	-	-	-	-
Mesophyll	SK1G00056599	XIPI	0.4256	0.34452	23989	15404	0.176	0.152	-0.304829	4.79528167174566e-14	1.76600633407049e-09	down	XIPI	XP_015641941.2 xylanase inhibitor protein 1 isoform X1 [Oryza sativa Japonica Group]	Metabolism;Metabolism	Global and overview maps;Carbohydrate metabolism	ko01100//Metabolic pathways;ko00520//Amino sugar and nucleotide sugar metabolism	K01183;K01183	-	-	GO:0005975//carbohydrate metabolic process
Mesophyll	SK1G00058315	At4g35850	0.206356	0.253044	23989	15404	0.104	0.129	0.294119474814176	4.99100199034769e-14	1.83808621300525e-09	up	At4g35850	XP_015640746.1 pentatricopeptide repeat-containing protein At4g35850, mitochondrial [Oryza sativa Japonica Group]	-	-	-	-	-	GO:0005515//protein binding	-
Mesophyll	SK1G00067210	Os11g0472000	0.177891	0.223796	23989	15404	0.088	0.111	0.331024024584827	6.68744073566403e-14	2.46285067413035e-09	up	Os11g0472000	EEE52080.1 hypothetical protein OsJ_33853 [Oryza sativa Japonica Group]	-	-	-	-	-	GO:0046872//metal ion binding	-
Mesophyll	SK1G00053878	HCT1	0.203708	0.274077	23989	15404	0.082	0.104	0.427898370355059	6.89071403936448e-14	2.53771216641715e-09	up	HCT1	XP_015635773.1 hydroxycinnamoyltransferase 1 [Oryza sativa Japonica Group]	Metabolism;Metabolism;Metabolism;Metabolism;Metabolism	Global and overview maps;Global and overview maps;Biosynthesis of other secondary metabolites;Biosynthesis of other secondary metabolites;Biosynthesis of other secondary metabolites	ko01100//Metabolic pathways;ko01110//Biosynthesis of secondary metabolites;ko00940//Phenylpropanoid biosynthesis;ko00941//Flavonoid biosynthesis;ko00945//Stilbenoid, diarylheptanoid and gingerol biosynthesis	K13065;K13065;K13065;K13065;K13065	-	GO:0016747//transferase activity, transferring acyl groups other than amino-acyl groups	-
Mesophyll	SK1G00039348	ASR3	0.515692	0.402527	23989	15404	0.143	0.118	-0.357348	8.98809135369778e-14	3.31013428373982e-09	down	ASR3	XP_015650008.1 abscisic stress-ripening protein 3 [Oryza sativa Japonica Group]	-	-	-	-	-	-	-
Mesophyll	SK1G00062033	SK1G00062033-UGT71K1	0.345251	0.428263	23989	15404	0.13	0.158	0.310768211610183	9.57869409381369e-14	3.52764146086971e-09	up	UGT71K1	KAB8105520.1 hypothetical protein EE612_039442 [Oryza sativa]	-	-	-	-	-	GO:0003677//DNA binding;GO:0004803//transposase activity;GO:0008194//UDP-glycosyltransferase activity;GO:0016758//transferase activity, transferring hexosyl groups	GO:0006313//transposition, DNA-mediated
Mesophyll	SK1G00053621	BADH1	0.375686	0.304173	23989	15404	0.163	0.136	-0.304545	1.1714969341295e-13	4.3143889090121e-09	down	BADH1	EEC77423.1 hypothetical protein OsI_16212 [Oryza sativa Indica Group]	Metabolism;Metabolism	Global and overview maps;Amino acid metabolism	ko01100//Metabolic pathways;ko00260//Glycine, serine and threonine metabolism	K00130;K00130	-	GO:0003842//1-pyrroline-5-carboxylate dehydrogenase activity;GO:0004350//glutamate-5-semialdehyde dehydrogenase activity;GO:0004491//methylmalonate-semialdehyde dehydrogenase (acylating) activity;GO:0004777//succinate-semialdehyde dehydrogenase (NAD+) activity;GO:0008802//betaine-aldehyde dehydrogenase activity;GO:0009013//succinate-semialdehyde dehydrogenase [NAD(P)+] activity;GO:0016491//oxidor…	GO:0006527//arginine catabolic process;GO:0006561//proline biosynthetic process;GO:0006562//proline catabolic process;GO:0006574//valine catabolic process;GO:0006578//amino-acid betaine biosynthetic process;GO:0009450//gamma-aminobutyric acid catabolic process;GO:0010124//phenylacetate catabolic process;GO:0055114//oxidation-reduction process
Mesophyll	SK1G00044936	Os03g0711400	0.171598	0.21613	23989	15404	0.088	0.112	0.332696543327019	1.19534241181462e-13	4.40220703423089e-09	up	Os03g0711400	XP_015631030.1 coatomer subunit alpha-1 [Oryza sativa Japonica Group]	-	-	-	-	GO:0030117//membrane coat;GO:0030126//COPI vesicle coat	GO:0005198//structural molecule activity;GO:0005515//protein binding;GO:0061630//ubiquitin protein ligase activity	GO:0006886//intracellular protein transport;GO:0016192//vesicle-mediated transport
Mesophyll	SK1G00052439	SK1G00052439-At3g47570	0.18648	0.23277	23989	15404	0.09	0.114	0.319726338957075	1.94755797976386e-13	7.17246652787436e-09	up	At3g47570	CAH66130.1 OSIGBa0135L04.4 [Oryza sativa]	-	-	-	-	-	GO:0004672//protein kinase activity;GO:0005515//protein binding;GO:0005524//ATP binding	GO:0006468//protein phosphorylation
Mesophyll	SK1G00048486	jade3	0.21798	0.273738	23989	15404	0.106	0.131	0.328462917656566	2.42143170297098e-13	8.91764867570153e-09	up	jade3	EAY87672.1 hypothetical protein OsI_09084 [Oryza sativa Indica Group]	-	-	-	-	-	-	GO:0035556//intracellular signal transduction
Mesophyll	SK1G00050332	SK1G00050332	0.201887	0.24256	23989	15404	0.099	0.122	0.264669007968391	3.35628522659295e-13	1.23605272324965e-08	up	--	XP_015623225.1 prefoldin subunit 1 [Oryza sativa Japonica Group]	-	-	-	-	GO:0016272//prefoldin complex	GO:0005515//protein binding;GO:0005524//ATP binding;GO:0051082//unfolded protein binding	GO:0006457//protein folding;GO:0007059//chromosome segregation;GO:0030261//chromosome condensation
Mesophyll	SK1G00049955	RPS14C	0.323164	0.391441	23989	15404	0.142	0.171	0.276450336760456	3.36448449570258e-13	1.23907235007735e-08	up	RPS14C	XP_015627702.1 40S ribosomal protein S14 [Oryza sativa Japonica Group]	Genetic Information Processing	Translation	ko03010//Ribosome	K02955	GO:0005840//ribosome;GO:0022627//cytosolic small ribosomal subunit	GO:0003735//structural constituent of ribosome;GO:2001070//starch binding	GO:0006412//translation
Mesophyll	SK1G00043184	MT3A	0.335663	0.422498	23989	15404	0.087	0.11	0.331840817816077	3.44839639441437e-13	1.26997542413492e-08	up	MT3A	A1YTM8.1 RecName: Full=Metallothionein-like protein 3A; AltName: Full=Class I metallothionein-like protein 3A; AltName: Full=OsMT-I-3a; Short=OsMT3; Short=OsMT3a [Oryza sativa Japonica Group]	-	-	-	-	-	GO:0046872//metal ion binding	-
Mesophyll	SK1G00068366	SK1G00068366	0.343171	0.414755	23989	15404	0.125	0.152	0.273259738470757	4.14177248064539e-13	1.52533196917209e-08	up	--	EEC67593.1 hypothetical protein OsI_34960 [Oryza sativa Indica Group]	-	-	-	-	-	-	-
Mesophyll	SK1G00058030	DHAR1	0.399039	0.320764	23989	15404	0.16	0.142	-0.314931	5.57444926586419e-13	2.05295817563246e-08	down	DHAR1	XP_015639453.1 12S seed storage protein CRB [Oryza sativa Japonica Group]	-	-	-	-	-	GO:0005515//protein binding;GO:0015035//protein disulfide oxidoreductase activity;GO:0016034//maleylacetoacetate isomerase activity	GO:0006559//L-phenylalanine catabolic process;GO:0006572//tyrosine catabolic process;GO:0006749//glutathione metabolic process
Mesophyll	SK1G00067899	SK1G00067899	0.500951	0.644291	23989	15404	0.11	0.134	0.362979225687659	5.64890780567716e-13	2.08037976667478e-08	up	--	-	-	-	-	-	-	-	-
Mesophyll	SK1G00058011	SK1G00058011	0.576379	0.439715	23989	15404	0.141	0.12	-0.390372	5.92377196945179e-13	2.18160674090971e-08	down	--	EAY96327.1 hypothetical protein OsI_18229 [Oryza sativa Indica Group]	-	-	-	-	-	-	-
Mesophyll	SK1G00043281	SK1G00043281	0.273074	0.213579	23989	15404	0.131	0.109	-0.354375	6.599081111443e-13	2.43030959172223e-08	down	--	EAY72796.1 hypothetical protein OsI_00660 [Oryza sativa Indica Group]	-	-	-	-	-	-	-
Mesophyll	SK1G00054124	BRE1A	0.21839	0.273772	23989	15404	0.108	0.133	0.325929060811777	6.63939039384448e-13	2.44515469424504e-08	up	BRE1A	A2XW69.2 RecName: Full=E3 ubiquitin-protein ligase BRE1-like 1; AltName: Full=RING-type E3 ubiquitin transferase BRE1-like 1 [Oryza sativa Indica Group]	-	-	-	-	GO:0000109//nucleotide-excision repair complex	GO:0005524//ATP binding;GO:0008270//zinc ion binding;GO:0046872//metal ion binding	GO:0006289//nucleotide-excision repair;GO:0007059//chromosome segregation;GO:0030261//chromosome condensation
Mesophyll	SK1G00039955	At2g26230	0.275605	0.347169	23989	15404	0.114	0.139	0.332931223605139	7.18581312802367e-13	2.64639125878856e-08	up	At2g26230	XP_015622191.1 uricase [Oryza sativa Japonica Group]	Metabolism;Metabolism;Metabolism	Global and overview maps;Nucleotide metabolism;Biosynthesis of other secondary metabolites	ko01100//Metabolic pathways;ko00230//Purine metabolism;ko00232//Caffeine metabolism	K00365;K00365;K00365	-	GO:0004846//urate oxidase activity	GO:0019628//urate catabolic process
Mesophyll	SK1G00040513	PSBW	0.270291	0.339662	23989	15404	0.107	0.132	0.329477844227301	7.3439162635582e-13	2.70461748154321e-08	up	PSBW	XP_015619359.1 photosystem II reaction center W protein, chloroplastic [Oryza sativa Japonica Group]	Metabolism	Energy metabolism	ko00195//Photosynthesis	K02721	GO:0009507//chloroplast;GO:0009523//photosystem II	-	GO:0015979//photosynthesis
Mesophyll	SK1G00075114	SK1G00075114-atpB	0.338453	0.418951	23989	15404	0.152	0.178	0.30774413797874	7.60701490309917e-13	2.80151144851336e-08	up	atpB	YP_005296425.1 atpB gene product [Oryza meridionalis]	Metabolism;Metabolism;Metabolism	Global and overview maps;Energy metabolism;Energy metabolism	ko01100//Metabolic pathways;ko00190//Oxidative phosphorylation;ko00195//Photosynthesis	K02112;K02112;K02112	GO:0000275//mitochondrial proton-transporting ATP synthase complex, catalytic core F(1);GO:0009288//bacterial-type flagellum;GO:0016469//proton-transporting two-sector ATPase complex;GO:0016471//vacuolar proton-transporting V-type ATPase complex;GO:0030257//type III protein secretion system complex;GO:0045261//proton-transporting ATP synthase complex, catalytic core F(1);GO:0045262//plasma membra…	GO:0003723//RNA binding;GO:0003724//RNA helicase activity;GO:0003924//GTPase activity;GO:0004386//helicase activity;GO:0005524//ATP binding;GO:0005525//GTP binding;GO:0008186//RNA-dependent ATPase activity;GO:0008553//hydrogen-exporting ATPase activity, phosphorylative mechanism;GO:0016887//ATPase activity;GO:0043531//ADP binding;GO:0046933//proton-transporting ATP synthase activity, rotational m…	GO:0001539//cilium or flagellum-dependent cell motility;GO:0006353//DNA-templated transcription, termination;GO:0009405//pathogenesis;GO:0015986//ATP synthesis coupled proton transport;GO:0015991//ATP hydrolysis coupled proton transport;GO:0030254//protein secretion by the type III secretion system;GO:0046034//ATP metabolic process;GO:1902600//hydrogen ion transmembrane transport
Mesophyll	SK1G00042631	ASK1	0.208509	0.254966	23989	15404	0.104	0.128	0.290070333391054	7.85579126219038e-13	2.89313080603947e-08	up	ASK1	XP_015616002.1 shaggy-related protein kinase alpha isoform X2 [Oryza sativa Japonica Group]	-	-	-	-	-	GO:0004672//protein kinase activity;GO:0005524//ATP binding	GO:0006468//protein phosphorylation
Mesophyll	SK1G00041854	UBP6	0.186551	0.234457	23989	15404	0.091	0.114	0.329594492818264	8.43066760066626e-13	3.10484626397337e-08	up	UBP6	XP_015622354.1 ubiquitin carboxyl-terminal hydrolase 6 [Oryza sativa Japonica Group]	-	-	-	-	-	GO:0004843//thiol-dependent ubiquitin-specific protease activity;GO:0005515//protein binding;GO:0032183//SUMO binding;GO:0070140//SUMO-specific isopeptidase activity	GO:0006289//nucleotide-excision repair;GO:0016579//protein deubiquitination
Mesophyll	SK1G00063829	SK1G00063829	0.273489	0.331314	23989	15404	0.132	0.159	0.27662282078176	9.23033467523918e-13	3.39934765419709e-08	up	--	XP_015625910.1 uncharacterized protein LOC4329110 [Oryza sativa Japonica Group]	-	-	-	-	GO:0030117//membrane coat	GO:0005515//protein binding	GO:0006886//intracellular protein transport;GO:0016192//vesicle-mediated transport
Mesophyll	SK1G00068948	SK1G00068948-DIR3	0.47217	0.384604	23989	15404	0.167	0.15	-0.295864	1.04526970740972e-12	3.84951927844853e-08	down	DIR3	EAY82438.1 hypothetical protein OsI_37651 [Oryza sativa Indica Group]	-	-	-	-	-	-	-
Mesophyll	SK1G00045956	Cacna2d3	0.202229	0.243823	23989	15404	0.1	0.123	0.269721041378972	1.16785500004298e-12	4.30097639415827e-08	up	Cacna2d3	XP_015631194.1 uncharacterized protein LOC4333081 isoform X1 [Oryza sativa Japonica Group]	-	-	-	-	-	-	-
Mesophyll	SK1G00059391	DI19-2	0.197053	0.253171	23989	15404	0.094	0.118	0.361361504765427	1.26035682826929e-12	4.64164212715014e-08	up	DI19-2	XP_015640312.1 protein DEHYDRATION-INDUCED 19 homolog 2 isoform X3 [Oryza sativa Japonica Group]	-	-	-	-	-	-	-
Mesophyll	SK1G00049048	SK1G00049048	0.312901	0.256044	23989	15404	0.155	0.135	-0.28921	1.27757714156883e-12	4.70506109696968e-08	down	--	XP_015625542.1 uncharacterized protein LOC4330340 [Oryza sativa Japonica Group]	-	-	-	-	-	-	-
Mesophyll	SK1G00067148	SK1G00067148	0.392406	0.475581	23989	15404	0.167	0.195	0.277280152679993	1.3440638373808e-12	4.949918300306e-08	up	--	ABA93779.1 expressed protein [Oryza sativa Japonica Group]	-	-	-	-	-	-	-
Mesophyll	SK1G00053360	SK1G00053360	0.177898	0.229008	23989	15404	0.085	0.107	0.364168165647582	1.52399393664523e-12	5.61256486987706e-08	up	--	XP_015633890.1 ribonuclease P protein subunit p25 isoform X2 [Oryza sativa Japonica Group]	Genetic Information Processing;Genetic Information Processing	Translation;Translation	ko03013//RNA transport;ko03008//Ribosome biogenesis in eukaryotes	K14525;K14525	GO:0005634//nucleus	GO:0003676//nucleic acid binding;GO:0003677//DNA binding;GO:0004526//ribonuclease P activity;GO:0004788//thiamine diphosphokinase activity	GO:0006325//chromatin organization;GO:0006772//thiamine metabolic process;GO:0008033//tRNA processing
Mesophyll	SK1G00072342	SK1G00072342-RAP74	0.320641	0.388066	23989	15404	0.148	0.176	0.275266426286592	1.53413543296486e-12	5.64991397252298e-08	up	RAP74	EAY77905.1 hypothetical protein OsI_32946 [Oryza sativa Indica Group]	Genetic Information Processing	Transcription	ko03022//Basal transcription factors	K03138	GO:0005634//nucleus;GO:0008023//transcription elongation factor complex	GO:0003677//DNA binding	GO:0006367//transcription initiation from RNA polymerase II promoter;GO:0006368//transcription elongation from RNA polymerase II promoter;GO:0032968//positive regulation of transcription elongation from RNA polymerase II promoter
Mesophyll	SK1G00064315	INRPK1	0.375437	0.4543	23989	15404	0.164	0.193	0.275008670741759	1.57525195038497e-12	5.80133788287778e-08	up	INRPK1	KAB8108705.1 hypothetical protein EE612_044598 [Oryza sativa]	-	-	-	-	-	GO:0004672//protein kinase activity;GO:0005515//protein binding;GO:0005524//ATP binding	GO:0006468//protein phosphorylation
Mesophyll	SK1G00055197	SLK2	0.194592	0.242653	23989	15404	0.09	0.113	0.318296418795074	1.62995286100907e-12	6.0027903965242e-08	up	SLK2	BAA90807.1 putative SEU1 protein [Oryza sativa Japonica Group]	-	-	-	-	-	GO:0005384//manganese ion transmembrane transporter activity	GO:0030026//cellular manganese ion homeostasis
Mesophyll	SK1G00060714	SK1G00060714-DAO	0.235552	0.303472	23989	15404	0.106	0.13	0.365379732284608	1.84259787367056e-12	6.78591944915394e-08	up	DAO	EAY99141.1 hypothetical protein OsI_21100 [Oryza sativa Indica Group]	-	-	-	-	-	GO:0016491//oxidoreductase activity	GO:0055114//oxidation-reduction process
Mesophyll	SK1G00041908	SWEET2A	0.410981	0.332914	23989	15404	0.165	0.142	-0.303841	1.97514484879056e-12	7.27406344912589e-08	down	SWEET2A	XP_015615030.1 bidirectional sugar transporter SWEET2a [Oryza sativa Japonica Group]	-	-	-	-	GO:0016021//integral component of membrane	-	-
Mesophyll	SK1G00051161	Os02g0194200	0.225355	0.272282	23989	15404	0.109	0.133	0.272794851820631	2.07925464076992e-12	7.65747899102745e-08	up	Os02g0194200	XP_015626985.1 zinc finger CCCH domain-containing protein 14 [Oryza sativa Japonica Group]	-	-	-	-	GO:0042151//nematocyst	GO:0000166//nucleotide binding;GO:0003723//RNA binding;GO:0004654//polyribonucleotide nucleotidyltransferase activity;GO:0005524//ATP binding;GO:0019871//sodium channel inhibitor activity;GO:0046872//metal ion binding	GO:0006402//mRNA catabolic process;GO:0009405//pathogenesis;GO:0015833//peptide transport
Mesophyll	SK1G00047794	mfsd5	0.303926	0.386021	23989	15404	0.097	0.12	0.344861539438319	2.22385243486514e-12	8.19000374712132e-08	up	mfsd5	EAY88269.1 hypothetical protein OsI_09722 [Oryza sativa Indica Group]	-	-	-	-	GO:0005887//integral component of plasma membrane;GO:0016021//integral component of membrane	GO:0015098//molybdate ion transmembrane transporter activity;GO:0015295//solute:proton symporter activity;GO:0022857//transmembrane transporter activity;GO:0042910//xenobiotic transporter activity	GO:0006810//transport;GO:0015689//molybdate ion transport;GO:0042908//xenobiotic transport;GO:0055085//transmembrane transport
Mesophyll	SK1G00041673	Ppp6r2	0.256551	0.31046	23989	15404	0.125	0.151	0.275063243784632	2.26789579049182e-12	8.35220661722326e-08	up	Ppp6r2	XP_015621009.1 serine/threonine-protein phosphatase 6 regulatory subunit 3 isoform X2 [Oryza sativa Japonica Group]	-	-	-	-	-	GO:0019903//protein phosphatase binding	GO:0043666//regulation of phosphoprotein phosphatase activity
Mesophyll	SK1G00056299	LIP5	0.249111	0.304554	23989	15404	0.123	0.148	0.289803399686534	2.6234914418847e-12	9.66179428217298e-08	up	LIP5	XP_015644354.1 protein HOMOLOG OF MAMMALIAN LYST-INTERACTING PROTEIN 5 [Oryza sativa Japonica Group]	Cellular Processes	Transport and catabolism	ko04144//Endocytosis	K12199	-	-	-
Mesophyll	SK1G00068291	SK1G00068291-EXO70A1	0.232665	0.284107	23989	15404	0.113	0.137	0.288064415743161	2.86595632361132e-12	1.05547439485958e-07	up	EXO70A1	XP_015615333.1 exocyst complex component EXO70A1 [Oryza sativa Japonica Group]	-	-	-	-	GO:0000145//exocyst	-	GO:0006887//exocytosis
Mesophyll	SK1G00040461	DGK5	0.511287	0.424439	23989	15404	0.189	0.161	-0.268516	2.9298577937752e-12	1.07900802829153e-07	down	DGK5	EEE55501.1 hypothetical protein OsJ_03694 [Oryza sativa Japonica Group]	Metabolism;Metabolism;Metabolism;Metabolism;Environmental Information Processing	Global and overview maps;Global and overview maps;Lipid metabolism;Lipid metabolism;Signal transduction	ko01100//Metabolic pathways;ko01110//Biosynthesis of secondary metabolites;ko00564//Glycerophospholipid metabolism;ko00561//Glycerolipid metabolism;ko04070//Phosphatidylinositol signaling system	K00901;K00901;K00901;K00901;K00901	GO:0005575//cellular_component	GO:0001727//lipid kinase activity;GO:0003951//NAD+ kinase activity;GO:0004143//diacylglycerol kinase activity;GO:0016301//kinase activity	GO:0006741//NADP biosynthetic process;GO:0007205//protein kinase C-activating G-protein coupled receptor signaling pathway;GO:0008150//biological_process
Mesophyll	SK1G00065869	At4g27270	5.67184	4.66025	23989	15404	0.452	0.45	-0.283404	3.01584601079099e-12	1.1106757688541e-07	down	At4g27270	XP_015650752.1 probable NAD(P)H dehydrogenase (quinone) FQR1-like 1 [Oryza sativa Japonica Group]	Metabolism;Metabolism;Metabolism	Global and overview maps;Global and overview maps;Metabolism of cofactors and vitamins	ko01100//Metabolic pathways;ko01110//Biosynthesis of secondary metabolites;ko00130//Ubiquinone and other terpenoid-quinone biosynthesis	K03809;K03809;K03809	-	GO:0003955//NAD(P)H dehydrogenase (quinone) activity;GO:0009055//electron carrier activity;GO:0010181//FMN binding;GO:0016491//oxidoreductase activity	GO:0055114//oxidation-reduction process
Mesophyll	SK1G00073615	ARB_01444	0.454998	0.379119	23989	15404	0.202	0.175	-0.263146	3.68847785693875e-12	1.3583926251534e-07	down	ARB_01444	XP_015612312.1 probable endo-1,3(4)-beta-glucanase ARB_01444 [Oryza sativa Japonica Group]	-	-	-	-	-	-	-
Mesophyll	SK1G00066174	PUMP1	0.183315	0.22283	23989	15404	0.09	0.112	0.28147893764579	3.78018390244265e-12	1.39216612759158e-07	up	PUMP1	XP_015616794.1 mitochondrial uncoupling protein 1 [Oryza sativa Japonica Group]	-	-	-	-	-	-	-
Mesophyll	SK1G00042608	ACLB-1	0.22548	0.275522	23989	15404	0.1	0.123	0.289051603546399	4.05504991765653e-12	1.49339378367455e-07	up	ACLB-1	XP_015621337.1 ATP-citrate synthase beta chain protein 1 [Oryza sativa Japonica Group]	Metabolism;Metabolism;Metabolism	Global and overview maps;Global and overview maps;Carbohydrate metabolism	ko01100//Metabolic pathways;ko01110//Biosynthesis of secondary metabolites;ko00020//Citrate cycle (TCA cycle)	K01648;K01648;K01648	-	GO:0003824//catalytic activity;GO:0003985//acetyl-CoA C-acetyltransferase activity;GO:0004774//succinate-CoA ligase activity;GO:0004775//succinate-CoA ligase (ADP-forming) activity;GO:0004776//succinate-CoA ligase (GDP-forming) activity;GO:0046912//transferase activity, transferring acyl groups, acyl groups converted into alkyl on transfer	GO:0006099//tricarboxylic acid cycle;GO:0046356//acetyl-CoA catabolic process
Mesophyll	SK1G00055297	SK1G00055297-PUB52	0.265036	0.331849	23989	15404	0.12	0.144	0.324232065666226	4.05564048005969e-12	1.49361127599638e-07	up	PUB52	XP_015643931.1 U-box domain-containing protein 35 isoform X1 [Oryza sativa Japonica Group]	-	-	-	-	GO:0005737//cytoplasm	GO:0004672//protein kinase activity;GO:0004832//valine-tRNA ligase activity;GO:0004842//ubiquitin-protein transferase activity;GO:0005524//ATP binding	GO:0006438//valyl-tRNA aminoacylation;GO:0006468//protein phosphorylation;GO:0016567//protein ubiquitination
Mesophyll	SK1G00048379	LKR/SDH	0.27027	0.331497	23989	15404	0.127	0.152	0.294493141404021	4.33827787648963e-12	1.5977009763536e-07	up	LKR/SDH	XP_015626026.1 alpha-aminoadipic semialdehyde synthase [Oryza sativa Japonica Group]	Metabolism;Metabolism;Metabolism	Global and overview maps;Global and overview maps;Amino acid metabolism	ko01100//Metabolic pathways;ko01110//Biosynthesis of secondary metabolites;ko00310//Lysine degradation	K14157;K14157;K14157	-	GO:0016491//oxidoreductase activity	GO:0055114//oxidation-reduction process
Mesophyll	SK1G00046707	SK1G00046707-RS2Z33	0.214771	0.263402	23989	15404	0.105	0.129	0.294342921267333	4.42072805011897e-12	1.62806572629781e-07	up	RS2Z33	AAO16998.1 Unknown protein [Oryza sativa Japonica Group]	Genetic Information Processing	Transcription	ko03040//Spliceosome	K12896	-	GO:0003676//nucleic acid binding;GO:0008270//zinc ion binding	GO:0008380//RNA splicing
Mesophyll	SK1G00064152	SHKA	0.177886	0.223662	23989	15404	0.088	0.11	0.330196616836868	4.93218824544257e-12	1.81642628703159e-07	up	SHKA	XP_015650153.1 phospho-2-dehydro-3-deoxyheptonate aldolase 1, chloroplastic-like [Oryza sativa Japonica Group]	Metabolism;Metabolism;Metabolism;Metabolism	Global and overview maps;Global and overview maps;Global and overview maps;Amino acid metabolism	ko01100//Metabolic pathways;ko01110//Biosynthesis of secondary metabolites;ko01230//Biosynthesis of amino acids;ko00400//Phenylalanine, tyrosine and tryptophan biosynthesis	K01626;K01626;K01626;K01626	-	GO:0003849//3-deoxy-7-phosphoheptulonate synthase activity	GO:0009073//aromatic amino acid family biosynthetic process;GO:0009423//chorismate biosynthetic process
Mesophyll	SK1G00046401	SK1G00046401	0.395406	0.32863	23989	15404	0.186	0.162	-0.266795	6.04564960737588e-12	2.22649183740439e-07	down	--	XP_015629926.1 uncharacterized protein LOC4332848 [Oryza sativa Japonica Group]	-	-	-	-	-	-	-
Mesophyll	SK1G00048590	gpmA	1.05296	0.866414	23989	15404	0.264	0.242	-0.281287	6.4211651728649e-12	2.36478670986268e-07	down	gpmA	XP_015623414.1 uncharacterized protein LOC4330747 [Oryza sativa Japonica Group]	Metabolism;Metabolism;Metabolism;Metabolism;Metabolism;Metabolism	Global and overview maps;Global and overview maps;Global and overview maps;Global and overview maps;Carbohydrate metabolism;Amino acid metabolism	ko01100//Metabolic pathways;ko01110//Biosynthesis of secondary metabolites;ko01200//Carbon metabolism;ko01230//Biosynthesis of amino acids;ko00010//Glycolysis / Gluconeogenesis;ko00260//Glycine, serine and threonine metabolism	K01834;K01834;K01834;K01834;K01834;K01834	-	GO:0008969//phosphohistidine phosphatase activity	GO:0000160//phosphorelay signal transduction system;GO:0009236//cobalamin biosynthetic process
Mesophyll	SK1G00074411	Os09g0533100	0.189916	0.231888	23989	15404	0.094	0.116	0.287929486785361	6.45467354454411e-12	2.37712717298471e-07	up	Os09g0533100	EEC84941.1 hypothetical protein OsI_32156 [Oryza sativa Indica Group]	Metabolism;Metabolism	Global and overview maps;Metabolism of cofactors and vitamins	ko01100//Metabolic pathways;ko00770//Pantothenate and CoA biosynthesis	K09680;K09680	-	GO:0004594//pantothenate kinase activity;GO:0005524//ATP binding	GO:0006085//acetyl-CoA biosynthetic process;GO:0015937//coenzyme A biosynthetic process
Mesophyll	SK1G00059617	CYCP3-1	0.767516	0.639334	23989	15404	0.235	0.213	-0.26359	6.52164941018731e-12	2.40179304478378e-07	down	CYCP3-1	XP_015640468.1 cyclin-P3-1 [Oryza sativa Japonica Group]	-	-	-	-	-	GO:0019901//protein kinase binding	GO:0000079//regulation of cyclin-dependent protein serine/threonine kinase activity
Mesophyll	SK1G00060158	Os05g0494200	0.558443	0.443666	23989	15404	0.166	0.143	-0.33187	7.85989002638368e-12	2.89464029891658e-07	down	Os05g0494200	XP_015639313.1 cysteine proteinase inhibitor 2 [Oryza sativa Japonica Group]	-	-	-	-	-	GO:0004869//cysteine-type endopeptidase inhibitor activity	-
Mesophyll	SK1G00041505	SK1G00041505	0.236986	0.291677	23989	15404	0.115	0.139	0.299454586930219	1.05766577892576e-11	3.89517153062779e-07	up	--	BAF05475.1 Os01g0613300 [Oryza sativa Japonica Group]	-	-	-	-	-	-	-
Mesophyll	SK1G00061623	SK1G00061623-Ipo5	0.233612	0.285993	23989	15404	0.116	0.14	0.291748309324656	1.07338149449319e-11	3.95304936791952e-07	up	Ipo5	XP_015647231.1 importin-5 [Oryza sativa Japonica Group]	-	-	-	-	GO:0000221//vacuolar proton-transporting V-type ATPase, V1 domain;GO:0030117//membrane coat	GO:0005515//protein binding;GO:0031267//small GTPase binding;GO:0046961//proton-transporting ATPase activity, rotational mechanism	GO:0006886//intracellular protein transport;GO:0016192//vesicle-mediated transport;GO:1902600//hydrogen ion transmembrane transport
Mesophyll	SK1G00063453	SK1G00063453	0.782047	0.621793	23989	15404	0.141	0.117	-0.330774	1.15781325024993e-11	4.26399463802042e-07	down	--	EEC81434.1 hypothetical protein OsI_24705 [Oryza sativa Indica Group]	-	-	-	-	-	-	-
Mesophyll	SK1G00050778	RPL21	0.324781	0.39423	23989	15404	0.141	0.167	0.279490061742925	1.36315824713757e-11	5.02023919255824e-07	up	RPL21	EAY85268.1 hypothetical protein OsI_06639 [Oryza sativa Indica Group]	Genetic Information Processing	Translation	ko03010//Ribosome	K02888	GO:0000311//plastid large ribosomal subunit;GO:0005840//ribosome;GO:0022625//cytosolic large ribosomal subunit	GO:0003735//structural constituent of ribosome	GO:0006412//translation
Mesophyll	SK1G00045807	ZFP36	0.314254	0.243831	23989	15404	0.11	0.088	-0.36592	1.39926719393473e-11	5.15322122182282e-07	down	ZFP36	XP_015616557.1 zinc finger protein 36-like [Oryza sativa Japonica Group]	-	-	-	-	-	-	-
Mesophyll	SK1G00058927	TIF3I1	0.192651	0.241606	23989	15404	0.091	0.113	0.326512475009639	1.5065615753564e-11	5.54836496972256e-07	up	TIF3I1	XP_015640038.1 eukaryotic translation initiation factor 3 subunit I [Oryza sativa Japonica Group]	Genetic Information Processing	Translation	ko03013//RNA transport	K03246	-	GO:0005515//protein binding	-
Mesophyll	SK1G00044245	SK1G00044245	0.31758	0.259813	23989	15404	0.146	0.125	-0.289545	2.36525503362634e-11	8.7107612378391e-07	down	--	ABF99264.1 VQ motif family protein, expressed [Oryza sativa Japonica Group]	Environmental Information Processing	Signal transduction	ko04016//MAPK signaling pathway - plant	K20725	-	-	-
Mesophyll	SK1G00063888	RABA5D	0.349928	0.422758	23989	15404	0.142	0.168	0.272702481928913	2.617360665344e-11	9.63921585832886e-07	up	RABA5D	XP_015648327.1 ras-related protein RABA5c [Oryza sativa Japonica Group]	Cellular Processes	Transport and catabolism	ko04144//Endocytosis	K07904	GO:0005737//cytoplasm	GO:0003924//GTPase activity;GO:0005524//ATP binding;GO:0005525//GTP binding;GO:0043022//ribosome binding	GO:0006400//tRNA modification;GO:0006576//cellular biogenic amine metabolic process;GO:0042254//ribosome biogenesis;GO:0046336//ethanolamine catabolic process
Mesophyll	SK1G00047160	SK1G00047160	0.215266	0.259285	23989	15404	0.106	0.129	0.268299309258514	2.82862247239932e-11	1.04172508413522e-06	up	--	EAY89026.1 hypothetical protein OsI_10510 [Oryza sativa Indica Group]	-	-	-	-	-	-	-
Mesophyll	SK1G00056981	SK1G00056981	0.344706	0.431065	23989	15404	0.102	0.125	0.322454850809928	3.16603091605324e-11	1.16598586576409e-06	up	--	XP_015641339.1 uncharacterized protein LOC107281173 isoform X2 [Oryza sativa Japonica Group]	-	-	-	-	GO:0042025//host cell nucleus	GO:0003700//transcription factor activity, sequence-specific DNA binding	GO:0006355//regulation of transcription, DNA-templated
Mesophyll	SK1G00051316	SK1G00051316	0.245078	0.297936	23989	15404	0.118	0.142	0.281661023409348	3.49054501965033e-11	1.28549791983682e-06	up	--	EAY84757.1 hypothetical protein OsI_06125 [Oryza sativa Indica Group]	-	-	-	-	-	-	-
Mesophyll	SK1G00065853	SK1G00065853-CRRSP55	0.289494	0.221201	23989	15404	0.109	0.092	-0.388022	3.56012641047584e-11	1.31112335445004e-06	down	CRRSP55	XP_015649882.1 cysteine-rich repeat secretory protein 55 [Oryza sativa Japonica Group]	-	-	-	-	-	-	-
Mesophyll	SK1G00074877	SK1G00074877-IPP	0.224252	0.275315	23989	15404	0.109	0.132	0.295846055592767	3.98404378690368e-11	1.46724364584089e-06	up	IPP	XP_015633507.1 soluble inorganic pyrophosphatase [Oryza sativa Japonica Group]	Metabolism	Energy metabolism	ko00190//Oxidative phosphorylation	K01507	GO:0005737//cytoplasm	GO:0000287//magnesium ion binding;GO:0004427//inorganic diphosphatase activity	GO:0006796//phosphate-containing compound metabolic process
Mesophyll	SK1G00051948	APS2	0.255623	0.200882	23989	15404	0.108	0.088	-0.347516	6.79632260543351e-11	2.50294968912905e-06	down	APS2	CAH65739.1 OSIGBa0127D24.2 [Oryza sativa]	Metabolism;Metabolism;Metabolism;Metabolism;Metabolism;Metabolism	Global and overview maps;Global and overview maps;Nucleotide metabolism;Energy metabolism;Metabolism of other amino acids;Biosynthesis of other secondary metabolites	ko01100//Metabolic pathways;ko01110//Biosynthesis of secondary metabolites;ko00230//Purine metabolism;ko00920//Sulfur metabolism;ko00450//Selenocompound metabolism;ko00261//Monobactam biosynthesis	K13811;K13811;K13811;K13811;K13811;K13811	-	GO:0004781//sulfate adenylyltransferase (ATP) activity	-
Mesophyll	SK1G00055659	HIDM	0.238121	0.189839	23989	15404	0.113	0.097	-0.32676	7.79019823125798e-11	2.86897420460769e-06	down	HIDM	XP_015643329.1 2-hydroxyisoflavanone dehydratase [Oryza sativa Japonica Group]	-	-	-	-	GO:0005576//extracellular region	GO:0008236//serine-type peptidase activity;GO:0016787//hydrolase activity	GO:0006508//proteolysis
Mesophyll	SK1G00045518	SK1G00045518	0.250865	0.312195	23989	15404	0.102	0.124	0.315426816087237	8.14797810993783e-11	3.0007373783279e-06	up	--	EAY90965.1 hypothetical protein OsI_12579 [Oryza sativa Indica Group]	-	-	-	-	-	-	-
Mesophyll	SK1G00044320	EBS	0.26626	0.329923	23989	15404	0.121	0.144	0.309189384019361	8.20559973877061e-11	3.02195827179444e-06	up	EBS	EEC76343.1 hypothetical protein OsI_13921 [Oryza sativa Indica Group]	-	-	-	-	-	GO:0003682//chromatin binding;GO:0005525//GTP binding	-
Mesophyll	SK1G00069098	At5g09300	0.234864	0.286458	23989	15404	0.104	0.126	0.286388564035183	1.04403103842429e-10	3.84495750830896e-06	up	At5g09300	XP_015619956.1 2-oxoisovalerate dehydrogenase subunit alpha 2, mitochondrial isoform X1 [Oryza sativa Japonica Group]	Metabolism;Metabolism;Metabolism;Metabolism	Global and overview maps;Global and overview maps;Amino acid metabolism;Carbohydrate metabolism	ko01100//Metabolic pathways;ko01110//Biosynthesis of secondary metabolites;ko00280//Valine, leucine and isoleucine degradation;ko00640//Propanoate metabolism	K00166;K00166;K00166;K00166	GO:0005737//cytoplasm;GO:0015627//type II protein secretion system complex;GO:0045250//cytosolic pyruvate dehydrogenase complex;GO:0045252//oxoglutarate dehydrogenase complex	GO:0003824//catalytic activity;GO:0004591//oxoglutarate dehydrogenase (succinyl-transferring) activity;GO:0004739//pyruvate dehydrogenase (acetyl-transferring) activity;GO:0008661//1-deoxy-D-xylulose-5-phosphate synthase activity;GO:0016624//oxidoreductase activity, acting on the aldehyde or oxo group of donors, disulfide as acceptor;GO:0030976//thiamine pyrophosphate binding	GO:0006086//acetyl-CoA biosynthetic process from pyruvate;GO:0006099//tricarboxylic acid cycle;GO:0006554//lysine catabolic process;GO:0006568//tryptophan metabolic process;GO:0008615//pyridoxine biosynthetic process;GO:0009228//thiamine biosynthetic process;GO:0009240//isopentenyl diphosphate biosynthetic process;GO:0015628//protein secretion by the type II secretion system;GO:0016114//terpenoid…
Mesophyll	SK1G00057026	SK1G00057026	0.337801	0.41737	23989	15404	0.116	0.138	0.305072331094837	1.07724397875778e-10	3.96727412496914e-06	up	--	KAF2927195.1 hypothetical protein DAI22_06g186800 [Oryza sativa Japonica Group]	-	-	-	-	-	-	-
Mesophyll	SK1G00070108	SK1G00070108-VIL1	0.212321	0.172633	23989	15404	0.108	0.087	-0.298378	1.10879386139888e-10	4.0834660327598e-06	down	VIL1	XP_015620391.1 VIN3-like protein 1 [Oryza sativa Japonica Group]	-	-	-	-	-	GO:0005515//protein binding	-
Mesophyll	SK1G00070452	SK1G00070452-DAR1	0.250105	0.309737	23989	15404	0.109	0.131	0.308401244931929	1.65377226491913e-10	6.09051249724417e-06	up	DAR1	XP_015618088.1 protein DA1-related 1 [Oryza sativa Japonica Group]	-	-	-	-	-	-	-
Mesophyll	SK1G00068497	SK1G00068497-GSVIVT00023967001	0.90502	0.724598	23989	15404	0.186	0.17	-0.32073	1.68190960714255e-10	6.1941367011846e-06	down	GSVIVT00023967001	XP_015616822.1 peroxidase 4 [Oryza sativa Japonica Group]	Metabolism;Metabolism;Metabolism	Global and overview maps;Global and overview maps;Biosynthesis of other secondary metabolites	ko01100//Metabolic pathways;ko01110//Biosynthesis of secondary metabolites;ko00940//Phenylpropanoid biosynthesis	K00430;K00430;K00430	-	GO:0004601//peroxidase activity;GO:0020037//heme binding	GO:0006979//response to oxidative stress;GO:0055114//oxidation-reduction process
Mesophyll	SK1G00056625	SK1G00056625	0.205933	0.253809	23989	15404	0.1	0.122	0.301437693272388	1.73447228002362e-10	6.38771451287097e-06	up	--	KAF2926678.1 hypothetical protein DAI22_06g146700 [Oryza sativa Japonica Group]	-	-	-	-	-	-	-
Mesophyll	SK1G00070897	FBX5	0.293648	0.356724	23989	15404	0.137	0.161	0.280633160724661	1.74690284720898e-10	6.43349380570122e-06	up	FBX5	XP_015614289.1 protein ARABIDILLO 1 [Oryza sativa Japonica Group]	-	-	-	-	-	GO:0005515//protein binding	-
Mesophyll	SK1G00063552	DIR1	0.389605	0.32268	23989	15404	0.165	0.145	-0.271832	2.00688894009078e-10	7.39097058856633e-06	down	DIR1	XP_015648011.1 dirigent protein 1 [Oryza sativa Japonica Group]	-	-	-	-	-	-	-
Mesophyll	SK1G00065547	SK1G00065547	0.234249	0.285147	23989	15404	0.112	0.135	0.283551925441344	2.1671778232035e-10	7.98128248729386e-06	up	--	XP_015651022.1 uncharacterized protein LOC4344817 [Oryza sativa Japonica Group]	-	-	-	-	-	GO:0042834//peptidoglycan binding	-
Mesophyll	SK1G00062979	SK1G00062979-TIF3E1	0.1647	0.203381	23989	15404	0.082	0.101	0.304175415064674	2.64462281256513e-10	9.73961689411485e-06	up	TIF3E1	ABK34475.1 eukaryotic initiation factor 3e [Oryza sativa Indica Group]	Genetic Information Processing	Translation	ko03013//RNA transport	K03250	-	GO:0000155//phosphorelay sensor kinase activity	GO:0007165//signal transduction
Mesophyll	SK1G00056712	TIP2-2	0.447105	0.370955	23989	15404	0.139	0.136	-0.269303	2.89348943867831e-10	1.06561429047645e-05	down	TIP2-2	QCZ35098.1 TIP2;2 [Oryza sativa Indica Group]	-	-	-	-	GO:0016020//membrane	GO:0015267//channel activity	GO:0055085//transmembrane transport
Mesophyll	SK1G00042929	Os01g0246100	0.216148	0.26566	23989	15404	0.107	0.129	0.297435717647181	2.90223304862498e-10	1.06883438714761e-05	up	Os01g0246100	KAB8080758.1 hypothetical protein EE612_001432 [Oryza sativa]	-	-	-	-	-	GO:0004402//histone acetyltransferase activity	GO:0006355//regulation of transcription, DNA-templated;GO:0016573//histone acetylation
Mesophyll	SK1G00059564	SK1G00059564-RER4	0.294398	0.353411	23989	15404	0.127	0.151	0.263495288655872	3.13542777325612e-10	1.15471534033477e-05	up	RER4	KAF2930580.1 hypothetical protein DAI22_05g147200 [Oryza sativa Japonica Group]	-	-	-	-	-	-	GO:0009236//cobalamin biosynthetic process
Mesophyll	SK1G00057391	SK1G00057391-ARID3	0.200664	0.242369	23989	15404	0.096	0.117	0.27229697825143	3.24996028792736e-10	1.19689537483789e-05	up	ARID3	EEC80995.1 hypothetical protein OsI_23739 [Oryza sativa Indica Group]	-	-	-	-	GO:0005681//spliceosomal complex	GO:0003677//DNA binding	GO:0000398//mRNA splicing, via spliceosome
Mesophyll	SK1G00064303	At4g14342	0.218639	0.264587	23989	15404	0.107	0.129	0.275073959249525	4.25510854811254e-10	1.56707137609889e-05	up	At4g14342	TYK13228.1 carboxy-terminal domain RNA polymerase II polypeptide A small phosphatase 1 [Cucumis melo var. makuwa] [Cucumis melo]	Genetic Information Processing	Transcription	ko03040//Spliceosome	K12832	-	-	-
Mesophyll	SK1G00060205	KRTCAP2	0.165384	0.20472	23989	15404	0.085	0.105	0.307661481153827	4.54295336397815e-10	1.67307886488587e-05	up	KRTCAP2	XP_015637783.1 protein KRTCAP2 homolog [Oryza sativa Japonica Group]	-	-	-	-	GO:0016020//membrane	GO:0005102//receptor binding;GO:0043548//phosphatidylinositol 3-kinase binding	GO:0014068//positive regulation of phosphatidylinositol 3-kinase signaling;GO:0030494//bacteriochlorophyll biosynthetic process;GO:0050776//regulation of immune response
Mesophyll	SK1G00049885	SK1G00049885-RPS10-1	0.182118	0.229617	23989	15404	0.085	0.105	0.334191315910014	5.17793823275187e-10	1.90693109235786e-05	up	RPS10-1	KAF0893826.1 hypothetical protein E2562_029710 [Oryza meyeriana var. granulata] [Oryza meyeriana]	Genetic Information Processing	Translation	ko03010//Ribosome	K02947	-	-	-
Mesophyll	SK1G00062778	SK1G00062778-TMEM184A	0.202702	0.249679	23989	15404	0.1	0.12	0.300584982818967	5.20655769494338e-10	1.91747106789375e-05	up	TMEM184A	XP_015644894.1 transmembrane protein 184A [Oryza sativa Japonica Group]	-	-	-	-	-	-	-
Mesophyll	SK1G00044863	SK1G00044863-ISPH	0.397579	0.49895	23989	15404	0.118	0.14	0.327579822506408	5.47893579888911e-10	2.01778247601488e-05	up	ISPH	EEC76125.1 hypothetical protein OsI_13396 [Oryza sativa Indica Group]	Metabolism;Metabolism;Metabolism	Global and overview maps;Global and overview maps;Metabolism of terpenoids and polyketides	ko01100//Metabolic pathways;ko01110//Biosynthesis of secondary metabolites;ko00900//Terpenoid backbone biosynthesis	K03527;K03527;K03527	-	GO:0046872//metal ion binding;GO:0051745//4-hydroxy-3-methylbut-2-en-1-yl diphosphate reductase activity	GO:0009240//isopentenyl diphosphate biosynthetic process;GO:0015968//stringent response;GO:0019288//isopentenyl diphosphate biosynthetic process, methylerythritol 4-phosphate pathway;GO:0046677//response to antibiotic;GO:0050992//dimethylallyl diphosphate biosynthetic process
Mesophyll	SK1G00073015	SK1G00073015	0.294322	0.372226	23989	15404	0.102	0.122	0.338679393505565	6.78427410595382e-10	2.49851246774067e-05	up	--	EAZ08248.1 hypothetical protein OsI_30504 [Oryza sativa Indica Group]	-	-	-	-	GO:0000109//nucleotide-excision repair complex;GO:0005680//anaphase-promoting complex	GO:0008270//zinc ion binding;GO:0016151//nickel cation binding;GO:0046872//metal ion binding;GO:0061630//ubiquitin protein ligase activity;GO:0097602//cullin family protein binding	GO:0006289//nucleotide-excision repair;GO:0031145//anaphase-promoting complex-dependent proteasomal ubiquitin-dependent protein catabolic process;GO:0051604//protein maturation
Mesophyll	SK1G00044278	SK1G00044278-FRL4A	0.223865	0.27754	23989	15404	0.107	0.128	0.309946599015429	7.07653234803565e-10	2.60614533313457e-05	up	FRL4A	EEC76321.1 hypothetical protein OsI_13877 [Oryza sativa Indica Group]	Environmental Information Processing	Signal transduction	ko04016//MAPK signaling pathway - plant	K20553	-	-	-
Mesophyll	SK1G00040395	SK1G00040395	0.168585	0.205956	23989	15404	0.087	0.106	0.28870934801615	8.31797940485037e-10	3.06334545521829e-05	up	--	XP_015620496.1 uncharacterized protein LOC4327625 [Oryza sativa Japonica Group]	-	-	-	-	GO:0016020//membrane	-	-
Mesophyll	SK1G00048656	NUA	0.187739	0.227247	23989	15404	0.089	0.108	0.275396882145821	1.18255198723753e-09	4.35510245859837e-05	up	NUA	EEC73978.1 hypothetical protein OsI_08886 [Oryza sativa Indica Group]	Genetic Information Processing	Translation	ko03013//RNA transport	K09291	-	GO:0005524//ATP binding	GO:0006606//protein import into nucleus;GO:0007059//chromosome segregation;GO:0030261//chromosome condensation
Mesophyll	SK1G00074093	SK1G00074093-dapC	0.270436	0.325128	23989	15404	0.117	0.139	0.265632957780887	1.18427504848369e-09	4.36144814855573e-05	up	dapC	EEE69839.1 hypothetical protein OsJ_29606 [Oryza sativa Japonica Group]	Metabolism;Metabolism	Global and overview maps;Amino acid metabolism	ko01100//Metabolic pathways;ko00270//Cysteine and methionine metabolism	K23977;K23977	GO:0005737//cytoplasm	GO:0003824//catalytic activity;GO:0003961//O-acetylhomoserine aminocarboxypropyltransferase activity;GO:0004121//cystathionine beta-lyase activity;GO:0004124//cysteine synthase activity;GO:0004400//histidinol-phosphate transaminase activity;GO:0004838//L-tyrosine:2-oxoglutarate aminotransferase activity;GO:0008483//transaminase activity;GO:0009016//succinyldiaminopimelate transaminase activity;GO…	GO:0000105//histidine biosynthetic process;GO:0006520//cellular amino acid metabolic process;GO:0006531//aspartate metabolic process;GO:0006559//L-phenylalanine catabolic process;GO:0006572//tyrosine catabolic process;GO:0008652//cellular amino acid biosynthetic process;GO:0009058//biosynthetic process;GO:0009086//methionine biosynthetic process;GO:0009087//methionine catabolic process;GO:0009093…
Mesophyll	SK1G00049252	CYB5	0.35612	0.442035	23989	15404	0.12	0.14	0.311720987374143	1.29754425843577e-09	4.77859599496724e-05	up	CYB5	XP_015625413.1 cytochrome b5 [Oryza sativa Japonica Group]	-	-	-	-	-	-	-
Mesophyll	SK1G00040821	SK1G00040821	0.21745	0.174536	23989	15404	0.106	0.088	-0.316995	1.37843727171664e-09	5.07650878427804e-05	down	--	EAY75686.1 hypothetical protein OsI_03594 [Oryza sativa Indica Group]	-	-	-	-	-	-	-
Mesophyll	SK1G00049299	SK1G00049299-MSBP1	0.337721	0.40793	23989	15404	0.122	0.145	0.27241396401349	1.37906997341173e-09	5.07883889808073e-05	up	MSBP1	EAY86846.1 hypothetical protein OsI_08230 [Oryza sativa Indica Group]	-	-	-	-	-	-	-
Mesophyll	SK1G00053734	NAR2.2	0.319175	0.25636	23989	15404	0.128	0.112	-0.316069	1.38671540530491e-09	5.10699549465692e-05	down	NAR2.2	EAY94557.1 hypothetical protein OsI_16333 [Oryza sativa Indica Group]	-	-	-	-	-	-	GO:0010167//response to nitrate;GO:0015706//nitrate transport
Mesophyll	SK1G00060641	SK1G00060641-Os05g0567100	0.230684	0.283612	23989	15404	0.108	0.128	0.297881744445227	2.15909279208241e-09	7.95150693468111e-05	up	Os05g0567100	XP_015639571.1 aspartic proteinase oryzasin-1 [Oryza sativa Japonica Group]	-	-	-	-	-	-	GO:0006629//lipid metabolic process
Mesophyll	SK1G00065801	SK1G00065801	0.302405	0.243379	23989	15404	0.126	0.107	-0.313159	2.31380790036418e-09	8.52129173546119e-05	down	--	KAB8107457.1 hypothetical protein EE612_042223 [Oryza sativa]	-	-	-	-	-	-	-
Mesophyll	SK1G00042157	DMP5	0.268129	0.221595	23989	15404	0.12	0.1	-0.274891	2.42778386760429e-09	8.94104242761308e-05	down	DMP5	XP_015634831.1 protein DMP10 [Oryza sativa Japonica Group]	-	-	-	-	-	-	-
Mesophyll	SK1G00057629	SK1G00057629-CRK10	0.197331	0.247285	23989	15404	0.09	0.109	0.325411166045904	2.46835845824313e-09	9.09047053001778e-05	up	CRK10	KAF2928209.1 hypothetical protein DAI22_06g261400 [Oryza sativa Japonica Group]	-	-	-	-	-	GO:0004672//protein kinase activity;GO:0005524//ATP binding	GO:0006468//protein phosphorylation
Mesophyll	SK1G00073912	WRKY76	0.773828	0.638004	23989	15404	0.184	0.165	-0.278409	2.67794856101856e-09	9.86234896051916e-05	down	WRKY76	Q6IEK5.1 RecName: Full=WRKY transcription factor WRKY76; Short=OsWRKY76 [Oryza sativa Indica Group]	-	-	-	-	-	GO:0003677//DNA binding;GO:0003700//transcription factor activity, sequence-specific DNA binding;GO:0004803//transposase activity;GO:0043565//sequence-specific DNA binding	GO:0006313//transposition, DNA-mediated;GO:0006355//regulation of transcription, DNA-templated
Mesophyll	SK1G00044873	ERS1	0.182403	0.222025	23989	15404	0.089	0.108	0.283451997038155	3.40908143694741e-09	0.000125549651159899	up	ERS1	XP_015631949.1 probable ethylene response sensor 1 [Oryza sativa Japonica Group]	Environmental Information Processing;Environmental Information Processing	Signal transduction;Signal transduction	ko04075//Plant hormone signal transduction;ko04016//MAPK signaling pathway - plant	K14509;K14509	GO:0016020//membrane	GO:0000155//phosphorelay sensor kinase activity;GO:0000156//phosphorelay response regulator activity;GO:0004673//protein histidine kinase activity;GO:0005515//protein binding;GO:0005524//ATP binding	GO:0000160//phosphorelay signal transduction system;GO:0006796//phosphate-containing compound metabolic process;GO:0006817//phosphate ion transport;GO:0007165//signal transduction
Mesophyll	SK1G00065662	SK1G00065662	0.249864	0.202155	23989	15404	0.117	0.101	-0.305548	4.16681636723769e-09	0.000153455513172629	down	--	EAZ05724.1 hypothetical protein OsI_27951 [Oryza sativa Indica Group]	-	-	-	-	-	-	-
Mesophyll	SK1G00048347	RSZP21	0.179471	0.218307	23989	15404	0.09	0.109	0.282469342925463	5.02264010474485e-09	0.000184973789777544	up	RSZP21	XP_015622565.1 serine/arginine-rich splicing factor RSZ21 isoform X1 [Oryza sativa Japonica Group]	Genetic Information Processing	Transcription	ko03040//Spliceosome	K12896	-	GO:0003676//nucleic acid binding;GO:0008270//zinc ion binding	GO:0008380//RNA splicing
Mesophyll	SK1G00043640	SK1G00043640	0.394858	0.318691	23989	15404	0.127	0.112	-0.30909	5.22662241997023e-09	0.000192486050482663	down	--	BAS70136.1 Os01g0121500, partial [Oryza sativa Japonica Group]	-	-	-	-	-	-	-
Mesophyll	SK1G00064886	MED14	0.170951	0.206142	23989	15404	0.085	0.103	0.269910719611021	5.73606707632978e-09	0.000211247878287073	up	MED14	XP_015649922.1 mediator of RNA polymerase II transcription subunit 14 [Oryza sativa Japonica Group]	-	-	-	-	-	-	-
Mesophyll	SK1G00053454	SK1G00053454-CLC-C	0.247134	0.204621	23989	15404	0.118	0.101	-0.272219	5.97662946520709e-09	0.000220107309944647	down	CLC-C	BAB97267.1 chloride channel [Oryza sativa Japonica Group]	-	-	-	-	GO:0016020//membrane	GO:0004122//cystathionine beta-synthase activity;GO:0005247//voltage-gated chloride channel activity	GO:0006821//chloride transport;GO:0019344//cysteine biosynthetic process;GO:0055085//transmembrane transport
Mesophyll	SK1G00074629	SK1G00074629	0.194303	0.239083	23989	15404	0.093	0.112	0.299064124330968	7.65020475941796e-09	0.000281741740879845	up	--	BAD45936.1 unknown protein [Oryza sativa Japonica Group]	-	-	-	-	-	GO:0009055//electron carrier activity	-
Mesophyll	SK1G00044679	FIP1	0.194801	0.160178	23989	15404	0.104	0.088	-0.282166	9.57423137596216e-09	0.000352599793113934	down	FIP1	EEC76141.1 hypothetical protein OsI_13429 [Oryza sativa Indica Group]	-	-	-	-	-	-	-
Mesophyll	SK1G00061225	Os07g0626600	0.183611	0.227115	23989	15404	0.087	0.105	0.306620808843225	9.57670845715086e-09	0.000352691019059952	up	Os07g0626600	EAZ04778.1 hypothetical protein OsI_26946 [Oryza sativa Indica Group]	-	-	-	-	-	GO:0004402//histone acetyltransferase activity;GO:0008080//N-acetyltransferase activity	GO:0006355//regulation of transcription, DNA-templated;GO:0016573//histone acetylation
Mesophyll	SK1G00048573	SK1G00048573	0.300698	0.249425	23989	15404	0.138	0.121	-0.269609	1.04717975842558e-08	0.000385655361432972	down	--	EAY87563.1 hypothetical protein OsI_08975 [Oryza sativa Indica Group]	-	-	-	-	-	-	-
Mesophyll	SK1G00066093	smndc1	0.17578	0.216615	23989	15404	0.084	0.102	0.301205332755503	1.15344362708468e-08	0.000424790218982744	up	smndc1	XP_015650899.1 survival of motor neuron-related-splicing factor 30 isoform X1 [Oryza sativa Japonica Group]	Genetic Information Processing	Transcription	ko03040//Spliceosome	K12839	GO:0005634//nucleus;GO:0005737//cytoplasm	GO:0003723//RNA binding;GO:0005515//protein binding	GO:0006397//mRNA processing;GO:0044780//bacterial-type flagellum assembly
Mesophyll	SK1G00063787	SK1G00063787-ARI8	0.176137	0.213282	23989	15404	0.085	0.103	0.275925646197126	1.23559764330771e-08	0.000455045900077365	up	ARI8	XP_015650118.1 probable E3 ubiquitin-protein ligase ARI8 [Oryza sativa Japonica Group]	-	-	-	-	-	-	-
Mesophyll	SK1G00064141	MBD8	0.223175	0.272299	23989	15404	0.11	0.13	0.286900820386427	1.33982902277793e-08	0.000493432232508655	up	MBD8	XP_015650383.1 uncharacterized protein LOC4345880 isoform X4 [Oryza sativa Japonica Group]	-	-	-	-	-	GO:0003677//DNA binding	-
Mesophyll	SK1G00069514	SK1G00069514-abhd17c	0.234357	0.281851	23989	15404	0.115	0.135	0.266116685957076	1.99072030870017e-08	0.0007331424752881	up	abhd17c	XP_015620614.1 alpha/beta hydrolase domain-containing protein 17B isoform X1 [Oryza sativa Japonica Group]	-	-	-	-	-	GO:0004806//triglyceride lipase activity;GO:0008236//serine-type peptidase activity;GO:0016787//hydrolase activity;GO:0047570//3-oxoadipate enol-lactonase activity	GO:0006508//proteolysis;GO:0016042//lipid catabolic process;GO:0042952//beta-ketoadipate pathway
Mesophyll	SK1G00041541	LUG	0.179442	0.221964	23989	15404	0.09	0.108	0.30666036290484	2.04509478799393e-08	0.000753167508522404	up	LUG	XP_015614366.1 transcriptional corepressor LEUNIG [Oryza sativa Japonica Group]	-	-	-	-	GO:0033588//Elongator holoenzyme complex	GO:0005515//protein binding	GO:0002098//tRNA wobble uridine modification
Mesophyll	SK1G00061260	SK1G00061260	0.172635	0.210715	23989	15404	0.088	0.106	0.287420489454678	4.00898467105149e-08	0.00147642887465484	up	--	EEE67652.1 hypothetical protein OsJ_25249 [Oryza sativa Japonica Group]	-	-	-	-	-	GO:0005515//protein binding	GO:0006457//protein folding;GO:0009408//response to heat
Mesophyll	SK1G00044252	Os03g0790700	0.197523	0.244154	23989	15404	0.092	0.109	0.305631538425515	4.16708073854816e-08	0.00153465249439252	up	Os03g0790700	EEC76311.1 hypothetical protein OsI_13843 [Oryza sativa Indica Group]	Metabolism;Metabolism	Global and overview maps;Amino acid metabolism	ko01100//Metabolic pathways;ko00380//Tryptophan metabolism	K11817;K11817	-	GO:0004854//xanthine dehydrogenase activity;GO:0009055//electron carrier activity;GO:0016491//oxidoreductase activity;GO:0043546//molybdopterin cofactor binding;GO:0046872//metal ion binding;GO:0051536//iron-sulfur cluster binding	GO:0009115//xanthine catabolic process;GO:0046415//urate metabolic process;GO:0055114//oxidation-reduction process
Mesophyll	SK1G00060110	SK1G00060110-FQR1	0.335144	0.417941	23989	15404	0.112	0.13	0.318429988469372	4.63395397376071e-08	0.0017065925694566	up	FQR1	XP_015637559.1 NAD(P)H dehydrogenase (quinone) FQR1 [Oryza sativa Japonica Group]	Metabolism;Metabolism;Metabolism	Global and overview maps;Global and overview maps;Metabolism of cofactors and vitamins	ko01100//Metabolic pathways;ko01110//Biosynthesis of secondary metabolites;ko00130//Ubiquinone and other terpenoid-quinone biosynthesis	K03809;K03809;K03809	-	GO:0003955//NAD(P)H dehydrogenase (quinone) activity;GO:0009055//electron carrier activity;GO:0010181//FMN binding;GO:0016491//oxidoreductase activity	GO:0055114//oxidation-reduction process
Mesophyll	SK1G00050058	SK1G00050058	0.247308	0.302172	23989	15404	0.102	0.12	0.288954244665235	5.38383114659061e-08	0.00198275733466639	up	--	XP_025878483.1 uncharacterized protein LOC4329482 [Oryza sativa Japonica Group]	-	-	-	-	-	-	-
Mesophyll	SK1G00045507	SK1G00045507	0.269302	0.224057	23989	15404	0.114	0.103	-0.265248	6.75951465379552e-08	0.00248939405669981	down	--	EAY90959.1 hypothetical protein OsI_12573 [Oryza sativa Indica Group]	-	-	-	-	-	GO:0005515//protein binding	-
Mesophyll	SK1G00039550	pitC	0.219757	0.269522	23989	15404	0.086	0.101	0.294373177287689	1.29614500199317e-07	0.00477344281334046	up	pitC	XP_015636207.1 phosphatidylinositol transfer protein 3 [Oryza sativa Japonica Group]	-	-	-	-	-	-	-
Mesophyll	SK1G00041707	ACO1	0.349679	0.276787	23989	15404	0.114	0.102	-0.33715	1.48907531393842e-07	0.00548396656617243	down	ACO1	XP_015632196.1 1-aminocyclopropane-1-carboxylate oxidase 1 [Oryza sativa Japonica Group]	Metabolism;Metabolism;Metabolism	Global and overview maps;Global and overview maps;Amino acid metabolism	ko01100//Metabolic pathways;ko01110//Biosynthesis of secondary metabolites;ko00270//Cysteine and methionine metabolism	K05933;K05933;K05933	-	GO:0016491//oxidoreductase activity	GO:0055114//oxidation-reduction process
Mesophyll	SK1G00062050	SK1G00062050	0.254189	0.211792	23989	15404	0.123	0.105	-0.263139	2.75327980860819e-07	0.0101397788791422	down	--	-	-	-	-	-	-	-	-
Mesophyll	SK1G00047195	OBE4	0.201999	0.243876	23989	15404	0.093	0.109	0.271675784846548	3.43515843136252e-07	0.0126510014710219	up	OBE4	KAF2938034.1 hypothetical protein DAI22_03g091100 [Oryza sativa Japonica Group]	-	-	-	-	-	-	-
Mesophyll	SK1G00073380	TANGO2	0.39417	0.486016	23989	15404	0.106	0.122	0.302118227627105	4.3829737197656e-07	0.0161416156151527	up	TANGO2	XP_015610870.1 transport and Golgi organization 2 homolog [Oryza sativa Japonica Group]	-	-	-	-	-	-	-
Mesophyll	SK1G00058650	SK1G00058650	0.183021	0.220346	23989	15404	0.09	0.107	0.267625050061766	5.93637736748855e-07	0.0218624905689868	up	--	BAF16780.1 Os05g0196400 [Oryza sativa Japonica Group]	-	-	-	-	-	-	-
Mesophyll	SK1G00051403	BCHB	0.193612	0.233374	23989	15404	0.099	0.115	0.269349249836758	6.72708740751526e-07	0.0247745175043972	up	BCHB	XP_015625230.1 BEACH domain-containing protein B isoform X1 [Oryza sativa Japonica Group]	-	-	-	-	-	GO:0005515//protein binding	-
Parenchymal	SK1G00066360	SK1G00066360-PLT5	8.71615	13.2492	4090	5737	0.774	0.885	0.604141667619278	3.16517687595398e-117	1.16567133987633e-112	up	PLT5	KAF2911827.1 hypothetical protein DAI22_11g209000 [Oryza sativa Japonica Group]	-	-	-	-	GO:0005887//integral component of plasma membrane;GO:0016021//integral component of membrane	GO:0008028//monocarboxylic acid transmembrane transporter activity;GO:0015238//drug transmembrane transporter activity;GO:0015295//solute:proton symporter activity;GO:0022857//transmembrane transporter activity;GO:0042910//xenobiotic transporter activity;GO:0051119//sugar transmembrane transporter activity	GO:0006810//transport;GO:0008643//carbohydrate transport;GO:0015718//monocarboxylic acid transport;GO:0015893//drug transport;GO:0042908//xenobiotic transport;GO:0055085//transmembrane transport
Parenchymal	SK1G00071311	SK1G00071311	8.19431	11.0414	4090	5737	0.752	0.886	0.430223307873605	1.62956439446436e-87	6.00135975193334e-83	up	--	-	-	-	-	-	-	-	-
Parenchymal	SK1G00069491	SK1G00069491-RBCS-A	25.7681	9.85278	4090	5737	0.725	0.705	-1.38698	2.25820797568953e-80	8.31652833286941e-76	down	RBCS-A	ASU47382.1 ribulose-1,5-bisphosphate carboxylase/oxygenase small subunit [Oryza punctata]	Metabolism;Metabolism;Metabolism;Metabolism;Metabolism	Global and overview maps;Global and overview maps;Global and overview maps;Energy metabolism;Carbohydrate metabolism	ko01100//Metabolic pathways;ko01110//Biosynthesis of secondary metabolites;ko01200//Carbon metabolism;ko00710//Carbon fixation in photosynthetic organisms;ko00630//Glyoxylate and dicarboxylate metabolism	K01602;K01602;K01602;K01602;K01602	-	-	-
Parenchymal	SK1G00047790	SK1G00047790	4.38045	6.60409	4090	5737	0.55	0.719	0.592268564755497	2.8577750632759e-74	1.05246140030325e-69	up	--	ACT78555.1 HRL protein [Oryza sativa Japonica Group]	-	-	-	-	-	-	-
[truncated: 6,864 more rows]
