# Supplementary material for: Multiomics analysis of the molecular and single-cell responses of rice after deep-space flight on Chang'e-5
Source: Research Square preprint supplement (doi:10.21203/rs.3.rs-7211908/v1), 2025-08-22
Supplement: Supplementary file 11 [file fc3ec9602ca80ad8eb95990e.xlsx]

## Sheet: DNA repair gene
Supplementary Data 10. FPKM of DNA repair gene, mutated gene and amino acid mutated gene in TK15.
DNA repair gene FPKM	Mutated gene FPKM	Amino acid mutated gene FPKM
11.15	48.37	48.37
7.35	22.65	22.65
1.03	82.19	5.01
5.83	141.27	883.7
20.44	5.01	49.44
4.79	92.09	7.54
3.02	883.7	162.07
3.06	179.2	31.71
1.74	83.06	24.65
9.81	49.44	95.76
0.52	182.99	5.01
1.21	72.75	20.77
1.4	54.1	662.93
2.42	120.01	45.8
14.28	7.54	3.06
6.99	77.82	3.13
1.9	27.14	1.93
2.09	162.07	6.21
2.47	38.03	3.7
1.88	31.71	35.13
8.5	9.93	4.94
0.28	16.53	8.94
11.75	24.65	0.24
2.07	95.76	32.22
5.55	245.34	7.22
15.34	42.07	47.45
9.11	5.01	499.19
1.24	14.43	51.57
0.51	87.82	19.3
3.53	20.77	5.83
4.52	52.12	22.56
0.05	662.93	6.47
0.05	45.8	4.04
0.13	141.64	6.72
0.63	23.28	30.54
0	12.33	11.82
23.46	48.63	3.33
8.37	17.46	45.33
16.39	3.06	29.38
2.06	11.23	91.73
73.54	26.92	1.61
7.16	20.52	4.54
10.09	11.76	145.6
0.52	10.34	19.45
0.4	3.13	2.01
1.45	1.93	7.73
13.86	3.62	34.63
5.84	6.21	24.65
0.72	808.75	22.72
0	21.55	0.48
4.52	3.7	6.58
0	150.63	6.82
6.03	13.17	3.77
5.08	16.11	19.23
14.91	35.13	41.56
4.68	15.56	12.41
0.39	4.94	17.71
6.43	8.94	6.56
0.77	0.24	2.09
0.32	3.41	17.6
4.17	32.22	6.02
1.61	7.22	5.16
16.68	25.05	39.82
5.55	41.73	180.72
0.27	22.47	7.68
0.24	47.45	33.07
0.72	7.92	24.85
3.06	456.73	1.51
1.71	0.62	13.57
0.06	3.2	52.45
9.7	5.59	52.66
0	11.01	83.79
0.09	38.38	20.12
0	499.19	8.44
0	35.57	8.18
0	16.93	38.77
1.83	50.24	146.3
0	22.17	29.9
0.94	21.09	18.97
0.85	51.57	59.43
4.96	19.3	0.26
0	5.83	108.5
0	22.56	20.95
0	47.06	2.58
0	6.47	24.73
0	9.06	6.04
0	4.04	275.87
32.88	30.36	35.87
13.7	23.28	7.03
54.49	6.72	40.94
28.04	19.14	14.21
33.25	8.42	11.77
15.44	162.06	14.87
77.1	23.75	1.24
37.54	30.54	10.99
10.19	17.02	23.22
2.09	11.82	222.91
22.72	28.96	36.97
0.1	3.33	1.26
10.28	1.5	16.36
7.61	4.81	7.25
11.22	45.33	1.15
85.92	49.67	4.24
1.67	29.38	52.68
98.67	7.07	70.44
6.68	55.07	7.47
20.28	171.64	43.19
0.07	91.73	9.98
27.35	89.5	3.29
12.2	1.61	119.23
10.54	4.54	9.84
883.7	16.3	0.26
77.82	34.03	5.89
9.93	8.5	2.08
34.14	145.6	329.1
7.81	0.36	28.32
9.06	5.07	20.74
55.07	19.45	16.65
6.54	16.85	65.27
8.27	261.42	37.3
15.43	64	12.71
40.4	54.54	3.56
71.24	76.62	53.33
8.63	2.01	157.47
168.83	15.43	70.31
45.65	33.9	43.25
90.5	65	0.52
34.17	7.73	49.25
7.68	3.15	4.33
14.9	104.42	4.59
52.66	101.92	5.12
0.81	14.08	7.63
32.09	51.23	4.82
11.9	39.48	25.49
13.33	34.63	3.69
108.97	59.62	17.64
6.04	23.37	53.84
22.67	20.84	15.13
3.3	0.04	0.46
10.99	18.88	20.14
37.88	46.08	5.09
7.16	10.2	11.61
1.99	24.65	1.71
15.78	22.72	22.77
157.47	0.48	26.74
143.09	2.41	21.53
2.84	16.14	0.04
22.43	6.58	2.76
5227.74	6.82	16.68
4.59	82.65	38.76
31.97	71.24	7.04
2.47	3.77	1.22
12.43	57.71	1.94
231.3	19.23	0.14
39.6	71.04	21.31
40.9	77.16	15.81
1.71	42.98	20.47
5.33	8.63	97.55
70.95	54.25	25.55
10.03	41.56	15.19
31.37	4.97	16.04
5.37	12.41	45.23
8.06	26.02	22.56
41.25	8.04	0.56
17.76	65.82	5.97
2	3.6	0.15
3.95	23.52	14.6
19.33	17.71	65.67
4.44	6.56	4.27
0.22	4.25	88.22
26.17	2.09	0.75
1.34	12.79	23.15
39.14	8.65	13.23
7.67	17.6	13.24
1.37	24.23	1.96
1.23	60.66	32.64
1.8	25.33	8.01
2.21	27.69	6.18
9.55	6.02	77.91
0.18	3.3	2.74
0.91	55.03	79.21
16.43	175.13	12.81
48.32	5.16	3.25
0.2	60.23	2.17
9.95	39.82	38.26
7.57	180.72	59.72
4.27	7.68	28.61
26.17	1.32	0.66
4.09	4.57	0.64
4.52	33.07	20.17
42.83	12.17	5.57
2.64	67.74	0.12
32.73	13.42	1.34
46.37	73.41	13.32
0.63	24.85	6.44
12.14	1.51	4.71
77.26	13.57	31.16
74.54	60.29	1.59
30.19	14.56	0.29
0.67	52.45	0.87
17.94	126.67	37.48
61.37	11.48	10.36
19.73	7.53	1.8
2.64	52.66	103.04
31.25	5.76	2.97
2.03	83.79	113.69
2.25	20.12	22.25
88.15	8.44	6.27
16.99	97.82	5.13
8.98	6.84	34.83
66.48	100.27	8.49
17.37	29.78	41.85
4.45	1.87	10.42
230.24	5.87	72.45
4.69	75.19	0.18
151.4	8.18	5.27
3.41	43.15	514.67
100.7	44.22	6.69
38.98	14.14	3.32
5.02	38.77	2.91
3.45	146.3	21.55
26.19	4.07	17.43
73.03	29.9	7.51
143.26	11.61	7.57
0.65	75.59	16.53
83.59	117.2	28.62
2.4	55.85	249.7
25.88	25	37.45
0.17	25.3	32.35
0.33	18.97	4.27
22.74	11.33	13.11
6.02	59.43	6.58
15.36	176.73	3.91
4.31	0.26	1.6
9.91	37.08	58.92
56.05	108.5	0.27
11.88	20.95	10.94
0.47	0.42	6.78
0	2.58	39.84
0.89	11.9	1.46
9.39	57.45	53.16
104.77	74.04	42.83
58.85	34.13	11.43
34.08	1.12	6.89
14.07	177.28	32.73
0.33	71.09	1.12
10.92	24.73	5.13
10.93	225.86	0.32
9.12	0.67	63.86
13.65	12.1	0.43
3.99	6.04	14.32
0	275.87	16.14
6.39	16.2	0.1
20.78	35.87	0.36
3.36	7.03	1.98
3.54	110.34	4.12
2.86	65.9	3.45
6.62	40.94	4.66
0.33	15.13	66.06
15.6	30	42.77
1.52	1.27	0.16
9.25	24.14	1.15
5.25	5.64	3.04
35.14	6.32	47.56
2.26	47.27	1.73
8.24	14.21	12.6
7.92	11.77	15.08
3.08	10.31	4.86
19.09	80.97	3.67
7.77	14.87	1.17
3.05	16.63	1.41
43.14	13.06	11.52
0.96	35.23	7.24
0.92	1.85	13.6
40.69	88.13	10.49
18.92	15.08	3.22
39.56	65.42	0.88
26.67	0.89	5.08
1.91	1.24	1.34
44.8	10.99	19.73
0.32	23.22	3.28
0.6	222.91	4.57
1.37	105.73	47.06
29.6	24.21	22.61
49.01	51.61	0.66
25.42	34.64	7.55
0.49	36.97	21.29
3.6	4.56	1.69
7.81	1.26	11.2
6.71	16.36	4.73
18.7	3.33	1.72
16.78	8.18	2.17
52.11	32.72	5.39
3.27	7.25	31.35
82.33	1.15	1.49
14.94	586.72	9.1
0.14	4.24	3.56
0.71	36.61	13.59
8.04	3.61	0.23
5.97	730.16	0.99
4.01	52.68	6.54
7.09	70.44	658.18
4.34	18.99	161.79
0.81	7.47	26.15
12.76	2.62	0.62
0	12.65	37
4.35	101.01	10
18.04	11.4	5.22
23.69	43.19	1.32
2.35	9.98	3.27
8.25	7.99	4.6
4.52	3.29	0.22
25.52	119.23	65.63
5.86	6.92	0.06
1	9.84	4.45
13.01	0.26	3.98
54.33	5.89	1.82
2.93	48.16	61.04
6.9	21.36	6.41
51.89	2.08	4.44
0.49	62.07	26.32
0.63	8.02	12.25
5.8	329.1	0.71
19.4	70.14	10.64
0.07	3.41	0.62
0	28.32	44.61
84.82	16.94	21.53
22.32	20.74	14.68
7.14	16.65	11.56
1.46	29.88	1.41
0	9.54	20.95
1.12	42.56	21.93
0.24	65.27	7.23
7.66	37.3	629.99
2.16	12.71	1.9
38.44	13.04	2.43
19.93	26.81	0.26
0.52	3.56	6.29
0	53.33	19.08
0	157.47	17.09
73.04	18.34	4.17
53.19	11.08	3.09
0.12	30.67	21.49
0	9.63	35.8
4.1	70.31	67.48
0.47	9.31	30.2
3.17	22.75	2.6
0.02	43.25	1.04
253.24	25.19	4.92
3.4	44.56	60.91
0.11	0.52	12.35
5.66	17.79	6.76
1.45	49.25	7.4
0.69	4.33	8.97
0.57	17.12	15.46
0.09	19.78	0
41.18	5227.74	20.05
0.76	35.55	10.04
5.24	4.59	29.93
0.08	5.12	2.71
41.59	7.63	39.94
0.08	33.37	6.24
4.54	0.47	9.14
0.03	27.38	3.48
0.48	2.58	1.57
0.13	0.96	12.6
76.09	4.82	1.26
1.18	35.28	2.5
0.13	25.49	10.92
0.02	4.61	39.82
7.01	67.24	66.33
8.9	2.47	2.21
0	4.92	16.67
0.15	3.69	65.87
1.59	72.77	35.04
0.34	3.73	2.88
3.17	12.43	13.94
2.1	17.64	210.22
0	53.58	124.58
4.05	35.44	2.33
0.09	100.79	6.02
6.26	0.43	5.57
1.01	5.93	20.77
42.33	3.23	2.8
1.09	53.84	7.14
0	15.13	2.63
4.12	19.85	71.9
0.39	0.5	4.35
115.18	0.46	0.67
1.22	28.94	4.5
0.73	20.14	17.8
11.5	5.09	37.26
0.12	10.02	1.27
26.32	2.81	12.83
82.56	7.04	0.42
18.44	5.89	4.31
0.19	3.2	27.72
4.46	11.61	1.51
8.79	0.35	0.51
0	2.77	0.66
1.3	31.5	15.99
36.46	1.71	2.41
0.09	0.46	0.38
123.77	18.97	32.93
0.16	168.34	0.41
5	55.84	0
97.05	15.4	12.97
0.29	22.77	13.85
34.2	48.31	48.46
14.45	69.27	244
18.46	14.79	4.82
0.34	26.74	20.73
11.78	21.53	5.44
3.45	5.4	0
5.56	0.04	66.62
4.21	2.76	14.63
0.07	28.61	16.12
28.2	10.03	2.16
49.8	16.68	8.27
0	38.76	2.15
2.1	7.04	6.1
8.18	1.22	17.67
1.6	1.94	89.58
376.65	1.33	41.64
3.5	0.14	9.14
2.97	21.31	5.83
91.26	15.81	1.38
1.38	33.83	4.32
7.05	20.47	3.62
0.04	97.55	5.66
5.03	25.55	3.22
38.8	56.72	17.1
0	9.77	0.36
0.03	52.57	12.91
6.08	44.21	0.92
23.5	15.19	29.31
0.45	0.51	3.61
0.16	43.48	1.9
0.12	54.24	2.9
0.35	2.8	5.15
0.74	1.89	2.3
0.9	16.04	1.17
0.36	31.37	46.74
106.22	5.38	34.08
2.99	54.71	167.29
0.05	45.23	4.14
0	22.56	27.33
8.22	31.52	20.03
4.64	0.56	18.62
2.99	46.71	2.65
0	43.27	36.45
3.23	34.39	87.04
10.96	20.83	176.29
42.07	5.97	15.62
0.01	5.27	11.02
3.01	39.82	8.13
1.47	1.79	22.32
0.04	32.22	2.26
1.66	0.15	44.53
0.41	14.6	0.76
0.45	48.84	0
0.19	12.33	2.88
0.18	65.67	2.97
0.05	30.85	2.03
5.16	28.37	4.35
0	1.33	0.19
21.91	4.27	2.25
0.02	41.28	8.23
4.4	3.9	0.06
26.81	88.22	1.31
0	0.75	13.94
12.51	7.96	0.08
12.73	23.15	11.77
0.02	41.06	1.62
0.03	13.23	0.16
1.46	100.56	3.74
2.55	9.99	0.3
1.33	13.24	54.24
0.2	24.84	0
0.02	1.96	27.27
0.97	32.64	9.68
0	3.88	3.93
7.58	8.01	7.53
1.04	1.97	6.44
0	6.18	31.13
0	0.53	2.34
44.15	20.69	0.51
0.24	11.77	0.51
64.35	16.86	0.42
0.19	77.91	0.07
2.1	31.53	0.83
0.1	10.85	1.78
7.37	279.45	19.69
0.12	2.74	1.91
1.13	9.17	4.94
2.34	50.9	16.39
1.1	36.76	16.91
0.1	79.21	7.74
0.43	12.81	4.3
0.88	106.45	6.42
0.04	3.25	1.48
0.13	22.83	11.65
14.68	0.29	2.15
0	2.17	4.56
0.12	38.26	25.45
0.63	22.27	0.38
18.75	59.72	1.52
6.02	93.1	0.69
35.6	2.55	0.21
2.83	20.1	92.23
0.12	44.41	5.25
1.34	79.16	29.05
38.32	28.61	1.72
16.84	0.93	2.27
0.04	20.3	44.99
2.53	54.51	14.55
0	39.64	4.35
13.75	0.66	13.45
21.17	33.38	2.91
0	4.82	1.01
0	18.73	83.77
0.44	3.62	26.08
33.09	47.16	0.05
3.13	0.64	8.24
0	412.14	15.18
6.62	16.24	67.22
0.82	6.03	6.93
0.82	20.17	4.06
4.55	0.69	8.19
0.06	29.02	11.7
8.92	16.7	2.89
0.09	0.9	27.24
0.2	8.68	13.8
0	5.57	47.08
4.5	0.12	37.61
26.54	46.5	0.82
17.58	4.21	12.69
0.05	56.3	0.63
16.01	172.3	29.27
26.15	58.32	5.51
7.52	4.83	4.91
0.33	1.34	31.74
0.19	8.77	4.46
6.36	25.66	1.72
73.21	12.47	0.2
0.2	8.91	6.97
3.58	13.32	10.88
7.73	6.44	1.15
0.42	45.74	0.61
96.41	4.71	26.22
3.94	1.35	0.35
1.47	24.09	0.51
6.27	31.16	0.51
13.78	0	40.47
1.88	1.2	10.78
0	1.59	0.72
9.9	1.82	4.25
0.16	48.53	9.76
36.7	0.29	5.45
1.8	0.87	1.72
0.13	32.66	34.44
4.49	45.75	2.94
0	2.43	2.3
0.05	37.48	1.94
11.11	11.3	0.92
0.14	90.91	29.78
0	1.68	0.5
0	10.36	75.94
0.34	1.8	9.51
0	94.91	0.53
3.72	103.04	44.93
0	2.97	1.4
34.83	113.69	44.26
0	22.25	0.24
8.47	85	14.1
75.28	6.27	12.09
0	2.92	16.97
0.44	58.27	21.21
2.98	0.77	0.2
130.71	5.13	34.48
11.38	34.83	151.17
16.51	77.61	101.56
0.13	61.76	0.05
0.84	8.49	0.51
2.02	10.52	64.15
0.16	41.85	0.32
0	17.83	1.21
0.1	10.42	1.88
8.07	22.19	13.08
0	110.25	56.85
0.94	22.27	11.29
0.73	58.85	43.19
0	74.47	16.89
0	72.45	1.67
0	58.06	2.28
0	68.48	0
0	0.18	12.61
0	7.77	0.19
0.22	5.43	4.5
0	42.36	0
0	5.27	56.21
36.22	73.91	0.03
0	514.67	20.95
0.3	6.69	19.18
0	3.32	0
15.32	86.9	0.72
0	97.82	2.85
8.82	60.44	21.74
0.67	2.91	0.58
0	0.11	27.33
0.87	32.92	2.97
0.24	0	1.61
0	21.55	32.67
0	0.91	3.17
1.2	62.23	34.9
123.5	16.38	0.49
0.3	64.55	3.28
0.39	75.74	1.15
31.85	9.7	0.01
23.66	3.77	0
5.47	24.87	5.6
0	2.97	7.99
0	38.21	0.16
0.74	41.82	3.34
0.07	8.79	15.81
0	17.43	6.83
9.89	57.61	0.92
0.11	1.48	7.02
0.11	7.51	0.77
0.09	2.83	8.53
0.1	7.57	0.87
7.7	0.56	5.85
0.54	11.17	17.42
0.05	10.09	0.25
0	16.53	18.13
0.02	21.61	37.49
0	28.62	3.37
0	55.68	3.27
0	5.56	36.03
0	20.67	3.99
0	29.15	2.28
0	249.7	20.39
0	6.13	13.26
0	78.28	0
0	56.96	68.59
0	38.68	32.81
0	37.45	11.77
0	41.49	2.11
0	25.94	39.31
0.67	32.35	0.97
32.13	55.64	31.06
0	4.27	18.05
0	152.6	21.28
0.02	13.11	22.66
0	3.56	21.19
9.89	5.34	3.26
1.3	6.58	0.53
0.24	3.91	0.5
20.85	1.6	4.34
2.85	29.05	3.81
0	2.4	4.7
0	567.39	20.3
0.49	58.92	4.82
1.2	0.27	2.27
0	1.87	0.63
0	10.94	0
0	235.55	44.2
0	2.19	0.37
0	72.72	5.76
0	6.78	0.14
0	39.84	15.99
0	1.46	2.46
0	53.16	1.12
0	42.83	3.09
0	6.77	4.33
0	11.43	2.37
0	1.12	0.08
0	18.26	4.4
0	61	11.05
0	41.42	1.11
0	119.75	31.39
0	0.94	0.03
0	46.87	32.05
0	6.89	0.22
0	30.58	20.71
0	32.73	6.46
0	89.86	6.41
0	16.28	15.9
0	46.37	5.62
0	1.12	2.59
0	19.53	4.53
0	5.13	0.54
0	0.32	2.37
0	0.4	4.04
0	1.19	7.5
0	63.86	2.76
0	22.24	5.86
0	0.43	0
0	10.76	0.12
0	14.32	0.54
0	16.14	1.41
	10.84	0.48
	55.73	12.41
	23.46	10.03
	398.68	0.89
	160.1	0.01
	0.1	1
	209.77	30.09
	29.67	5.32
	12.65	31.92
	0.36	1.23
	47.09	0
	15.89	0.66
	31.66	1.18
	12.14	27.91
	1.98	41.87
	4.12	19.69
	24.63	5.64
	3.45	29.87
	207.28	63.54
	4.66	8.2
	0.34	41.85
	27.09	3.65
	33.52	0
	66.06	0
	3.49	16.79
	1.16	0
	42.77	0.17
	7.78	12.69
	203.29	0.48
	0.16	0.48
	28.67	9.02
	1.15	18.28
	79.53	1.54
	4.33	0.15
	3.21	18.99
	3.04	20.92
	38.38	13.95
	39.04	58.45
	5.41	9.85
	47.56	184.93
	3.18	0.48
	1.73	0.29
	147.15	4.87
	17.94	20.26
	11.5	55.04
	52.62	2.91
	12.6	3.53
	7.68	11.76
	0.11	0.24
	15.08	19.67
	2.83	5.57
	0.62	0.2
	4.86	0.15
	54.19	23.59
	14.07	5.12
	3.67	4.36
	17.55	7.63
	17.4	0
	1.17	0.45
	53.38	16.55
	13.71	0
	74.62	0.74
	18.69	43.14
	150.21	5.9
	10.42	0.74
	1.41	0.82
	1.91	37.39
	18.64	23.93
	13.59	19.67
	27.69	0.73
	22.01	0
	17.36	0.49
	11.52	9.45
	4.15	0.12
	7.24	5.56
	13.6	3.57
	53.65	0.22
	10.49	25.45
	17.42	12.87
	3.22	1.35
	0.88	7.86
	5.08	2.85
	2.18	0
	0.49	0.25
	47.09	1.1
	23.21	4.06
	5.59	2.15
	34.13	84.82
	17.26	6.51
	1.34	0.26
	6.25	1.59
	19.73	3.46
	11.09	1.36
	5.37	1.84
	3.28	0
	2.82	18.35
	4.57	1.39
	47.06	6.29
	46.94	0
	32.07	0.39
	22.61	1.85
	9.81	9.82
	9.68	7.74
	8.95	0.09
	0.66	0.25
	1.16	33.03
	6.27	0
	7.22	5.05
	7.55	0.12
	21.29	0.06
	58.21	15.41
	1.69	4.7
	7.8	1.14
	4.3	63.37
	11.2	9.21
	4.73	3.39
	1.72	2.6
	2.17	0.54
	5.39	24.8
	31.35	0.52
	53.03	0.41
	21.11	0.81
	24.62	14.79
	47.9	8.63
	6.5	3.35
	1.49	0.44
	9.1	15.73
	3.56	36.86
	15.42	5.82
	38.75	2.16
	13.59	42.83
	0.23	3.54
	5.45	2.07
	26.93	0.62
	23.12	3.79
	41.25	17.52
	23.63	1.77
	20.87	0.19
	31.25	40.25
	1.14	3.93
	7.11	0.04
	75.55	0.15
	13.04	0
	0.99	0
	59.24	2.58
	79.73	0.7
	6.54	11.73
	16.03	11.81
	5.07	31.45
	2.6	0.49
	104.77	0.35
	658.18	13.39
	7.43	32.64
	5.54	18.05
	16.88	27.3
	161.79	0.09
	6.53	0
	8.01	10.15
	16.99	5.69
	8.83	27.37
	2.93	1.05
	6.21	6.81
	26.15	8.11
	16.82	0.12
	0.62	53.19
	5.05	0
	11.09	1.4
	37	17.9
	10	1.39
	7.23	13.77
	27.53	15.11
	5.22	3.5
	1.32	17.16
	66.22	0.8
	13.64	10.24
	27.51	1.18
	3.27	0.05
	35.61	1.35
	4.6	59.62
	5.77	0.92
	8.08	0
	0.22	3.43
	0.05	14.33
	11.93	41.18
	3.72	10.28
	65.63	30.14
	16.53	11.63
	1.22	0.04
	28.05	0.53
	0.35	0.41
	0.06	13.9
	53.88	62.31
	46.15	28.09
	30.83	0.5
	38.28	0.45
	143.9	13.56
	0.54	63.14
	3.9	1.67
	6.04	0.02
	30.59	0.34
	9.24	0
	41.68	0.06
	5.36	1.73
	32.22	1.24
	4.45	0
	11.91	39.53
	1.12	2.86
	57.57	0.29
	18.8	0.72
	1.6	5.53
	77.72	0
	72.18	0.16
	3.98	2.08
	19.83	1.11
	252.46	24.4
	1.82	11.4
	29.43	29.08
	61.04	15.12
	55.32	1.45
	200.21	5.4
	58.96	0.28
	6.41	6.67
	3.84	0.02
	8.52	4.62
	0.93	1.77
	33.67	3.84
	4.44	2.04
	26.32	0
	12.25	3.3
	0.71	0
	4.1	4.94
	10.64	0.1
	31.02	21.64
	46.51	1.32
	0.62	8.76
	44.61	212.4
	21.53	0.5
	151.4	0.67
	102.39	0.48
	350.67	0.33
	20.54	6.38
	14.68	0.34
	11.56	21.6
	63.06	0.13
	1.41	1.07
	20.39	0.59
	20.95	0.09
	21.93	0.27
	3.76	30.02
	0.2	38.49
	7.23	1.94
	8.35	0.02
	49.39	0.54
	629.99	18.04
	1.9	2.58
	43.22	0
	1.32	0
	15.69	5.37
	14.92	19.9
	2.43	15.66
	58.87	8.6
	0.55	1.03
	3.57	2.3
	0.26	1.12
	6.29	0.08
	106.49	3.54
	60.17	0.26
	3.27	6.71
	19.08	0.06
	29.57	0.11
	13.11	26.53
	5.44	50.24
	17.09	0.19
	4.17	1.79
	53.94	0
	0.19	0.28
	74.37	1.4
	5.65	0.13
	9.77	0.12
	20.86	8.22
	0.33	0.96
	0.26	48.9
	7.27	2.12
	3.09	0.18
	21.49	1.43
	0.43	0.77
	11.97	0.38
	9.17	0.23
	0.08	0.13
	1.19	0.38
	8.57	9.24
	105.86	2.94
	35.8	0.21
	7.49	1.18
	67.48	0.2
	30.2	1.02
	2.6	89.1
	61.8	4.03
	1.04	1.7
	4.92	6.15
	60.91	2.29
	12.35	0.13
	4.72	0.51
	57.38	23.39
	6.76	0.02
	7.4	0.12
	8.97	0.35
	15.46	15.76
	0	0.58
	42.51	2.38
	20.05	0.16
	7.01	61.24
	10.04	0.68
	29.93	0.03
	2.71	1.26
	41.53	36.79
	0.82	23.59
	39.94	1.49
	0	0.1
	2.53	0.6
	6.24	0.69
	9.14	63.13
	3.48	19.5
	22.77	0
	1.57	29.07
	3.9	2.74
	16.36	0.03
	12.6	0.09
	1.26	8.9
	5.86	0.02
	22.32	1.69
	1.06	3.88
	12.86	0.34
	4.13	0
	2.5	0.68
	15.49	4.44
	10.92	12.11
	39.82	5.55
	1.31	10.96
	18.05	3.66
	50.27	30.57
	66.33	0.35
	2.21	52.67
	241.01	0
	16.67	1.29
	65.87	0
	20.28	0.17
	52.69	32
	35.04	0.39
	0.93	2.88
	44.12	0.19
	3.06	0.45
	27.25	6.21
	2.88	0.01
	3.28	0.02
	24.2	0.43
	1.67	1.88
	1.47	0.42
	5341.98	0.57
	2.4	11.78
	7.06	2.1
	0.17	0
	4.34	0.45
	2.08	0.51
	123.22	12.81
	32.17	0.1
	30.29	4
	13.94	0.37
	60.97	27.02
	25.69	0
	210.22	18.74
	32.15	2.54
	18.31	1.09
	12.69	0.09
	33.12	0.11
	488.21	20.59
	2.07	0.15
	0.87	2.02
	124.58	1.2
	2.33	1.6
	11.64	1.94
	7.45	0.23
	56.5	1.81
	6.12	71.78
	198.28	2.65
	2.38	13.67
	6.02	0.12
	5.68	9.81
	106.89	6.84
	5.57	8.4
	20.77	0.68
	3.25	0.71
	2.8	3.43
	5.35	0
	16.75	23.21
	7.14	366.13
	1.95	0
	2.63	0
	7.55	12.75
	71.9	5.78
	17.48	2.98
	4.35	0.14
	13.58	1.52
	20.56	0
	1.61	2.89
	19.47	0.1
	0.67	0
	21.99	0.08
	4.5	6.55
	17.8	25.45
	13.34	25.32
	37.26	0
	1.27	0.92
	6.85	0
	2.67	0.46
	12.83	0
	3.53	35.6
	0.42	1.48
	7.06	11.4
	1.68	1.05
	4.31	0.06
	15.74	26.17
	4.29	4.51
	27.72	20.71
	1.51	0.19
	2.39	4.46
	30.41	0.45
	0.51	15.27
	0	35.61
	0.66	63.46
	15.99	0.05
	46	0.86
	62.66	0.31
	35.5	0.06
	1.16	15.31
	16.47	21.08
	2.41	29.52
	20.3	9.39
	73.27	0.4
	4.93	0.49
	44.08	0.52
	3.94	3.56
	0.38	25.86
	30.49	0.12
	32.93	0
	0.41	17.46
	9.4	4.69
	0	22.47
	8.88	37.05
	12.97	2.84
	59.5	0.52
	0.23	3.25
	13.85	4.07
	0.34	0.11
	28.62	1.39
	48.46	0.05
	45.64	4.96
	7.65	0
	34.4	3.67
	1.65	0.12
	6.83	5.94
	51.44	0.54
	6.59	1.14
	29.72	0
	30.5	5.17
	44.22	27.61
	0.44	0.24
	30.44	1.1
	244	0
	17.94	0.28
	4.82	0
	4.15	4.33
	0.76	1.6
	17.34	26.89
	3.68	42.11
	28.17	4.3
	20.73	0
	12.04	0.25
	10.45	0.21
	6.95	0
	20.36	0.3
	64.68	0.04
	85.22	10.59
	5.44	8.52
	0.33	45.53
	9.39	0
	12.58	0.14
	8.4	0.88
	0	5.84
	20.94	5.49
	12.58	3.59
	33.16	0
	19.47	0.84
	6.06	3.87
	0	0.11
	884.17	1.22
	66.62	14.89
	14.63	2.48
	16.12	11.53
	16.65	0.21
	7.01	1.37
	2.16	0
	8.27	33.3
	2.15	7.6
	6.1	1.65
	45.27	29.29
	31.25	0.67
	17.67	0
	5.11	4.62
	0.14	0.33
	46.5	5
	89.58	6.87
	41.64	0.45
	48.38	21.55
	228.86	20.46
	9.14	1.78
	71.42	59.43
	4.68	37.31
	5.83	2.14
	58.85	0.05
	4.86	1.99
	1.38	2.69
	4.32	4.11
	63.62	10.06
	3.62	0.02
	21.57	0.36
	5.66	1.25
	17.79	0
	41.13	0.44
	3.22	0.75
	6.91	7.36
	37.54	5.66
	17.1	0
	0.36	26.35
	12.91	8.66
	35.7	0.31
	0.92	9.78
	8.85	0.76
	9.59	0.04
	29.31	4.91
	49.05	0.01
	129.31	25.89
	3.61	0
	8.1	0.08
	12.89	0
	3.83	0.03
	28.63	8.48
	2.76	1.99
	30.69	0.13
	1.9	2.63
	2.09	0.05
	19.42	2.41
	2.9	0.66
	12.12	7.37
	53.56	4.74
	4.87	0.21
	5.15	64.35
	33.02	0.42
	2.3	0.22
	1.66	0.49
	1.17	13.15
	46.74	45.58
	34.08	38.23
	167.29	23.59
	108.92	42.87
	25.09	0
	14.07	1.72
	156.45	18.24
	1.4	4.88
	4.14	0
	0.36	0.84
	21.4	0.15
	15.58	0.45
	27.33	0.01
	1.46	0.05
	20.03	12.17
	20.81	149.73
	0.81	84.95
	16.6	0
	181.85	0.67
	18.62	7.41
	2.65	0.34
	36.45	5.2
	87.04	1.42
	5.49	0.45
	11.44	0
	12.62	0
	176.29	0
	15.62	0.04
	0.72	5.71
	11.02	3.23
	15.07	0.09
	18.01	0
	8.13	0.14
	157.02	0
	19.28	5.12
	10.36	0
	22.32	0.26
	2.26	0.82
	25.83	15.59
	0.59	75.27
	32.87	2.15
	19.13	0
	44.53	6.64
	0.76	3.5
	14.65	3.29
	0	4.19
	1.48	115.84
	1.67	0
	8.52	7.53
	2.88	1.01
	9.08	1.38
	2.97	0.73
	2.03	5.58
	4.35	0.64
	6.47	15.64
	2.65	0.55
	6.33	0.24
	17.34	4.16
	1.93	0.27
	0.19	15.54
	2.25	0.03
	0.38	3.4
	28.92	1.05
	8.23	0.06
	44.82	0.19
	17.91	9.21
	0.06	0.59
	5.15	0.04
	1.31	8.56
	2.52	5.32
	13.94	4.07
	13.65	0.26
	4.46	7.39
	7.2	0.41
	0.08	0.09
	1375.19	12.71
	6	9.26
	2.65	0.68
	0.91	0
	1.38	0.12
	11.77	1.04
	0.94	9.23
	1.62	3.2
	0.46	1.74
	3.06	1.12
	0.16	0.62
	3.74	0.16
	53.36	6.53
	1.13	7.54
	26.44	0.42
	4.11	10.68
	213.5	2.56
	15.41	4.54
	4.76	0.95
	0.3	0.35
	19.58	0.83
	0.78	8.69
	36.94	0.55
	1.89	3.08
	49.2	0
	6.28	0
	1.2	10.32
	0	0
	64.48	0.07
	54.24	12.82
	11.52	0.74
	0	5.96
	27.27	0.17
	9.68	0
	3.93	0.36
	0.04	3.49
	64.05	341.89
	7.53	42.02
	6.44	1.31
	31.13	0.08
	5.87	0.03
	2.34	0.02
	2.65	0.19
	0.51	0.08
	0.51	0.41
	0.42	0.56
	46.72	0.29
	127.5	0
	3.89	2.78
	131.04	0.21
	0.07	0
	19.38	2.77
	24.62	9.03
	1.63	1.44
	4.28	0.35
	3.48	14.16
	1.5	2.4
	7.42	4.39
	26.75	0.04
	11.75	3.03
	36.27	1.15
	0.83	0.65
	75.85	37.23
	3.96	4.43
	52.09	5.98
	192.12	0.49
	1.78	12.5
	19.69	0.31
	1.91	0.19
	5.88	0
	17.24	1.11
	11.04	0
	4.94	9.26
	42.48	0
	11.69	14.89
	16.39	4.33
	14.02	0.26
	6.62	0.26
	2.54	0.12
	0.33	0
	28.36	0.1
	16.91	4.65
	7.74	0.17
	12.86	2.7
	4.3	0.34
	14.74	0
	8.54	0.74
	15.02	14.54
	10.42	32.14
	0.46	5.53
	2.43	7.42
	6.42	0
	1.48	8.22
	11.65	0.06
	2.15	0.41
	4.56	11.06
	25.45	0
	20.66	5.87
	29.82	5.56
	9.34	0.09
	922.55	0.07
	52.91	0
	2490.78	0
	0.38	2.99
	26.83	8.24
	7.28	1.22
	23.35	3.24
	290.17	0
	1.52	0
	0.69	5.14
	0.21	161.73
	92.23	5.85
	5.25	0
	163.4	0
	5.41	0.03
	29.05	6.82
	1.72	0.44
	0	38.6
	2.27	0.01
	44.99	14.38
	12.04	13.52
	5.43	18.74
	40.41	0.9
	2.49	0
	0.21	22
	14.55	0.08
	7.06	0
	2.26	26.07
	4.35	3.61
	13.45	6.74
	12.26	11.01
	0.31	0.1
	2.91	0
	25.07	1
	49.12	0
	1.01	170.12
	3.11	0.32
	83.77	12.76
	26.08	47.93
	47.32	0.25
	3.05	0
	15.27	0
	0.64	103.49
	11.76	1.6
	0.05	1.95
	28.96	0.19
	8.24	0
	12.62	0.02
	35.21	0
	6.99	0.3
	0.4	1.44
	15.18	0.04
	0.43	1.41
	67.22	26.21
	6.93	44.76
	141.53	0.22
	2.65	3.87
	24.39	0.03
	0.28	0.23
	19.95	0.07
	2.36	1.22
	52.7	0.08
	19.09	3.63
	23.45	0
	4.06	0.74
	20.04	1.7
	8.19	5.07
	1.49	0.23
	4.81	0
	67.41	0.21
	11.7	0.09
	189.31	0.56
	2.89	0.31
	21.6	3.26
	5.35	0.18
	23.93	3.18
	0.48	0
	3.1	0.09
	1.88	0.17
	27.24	7.18
	0.15	0.04
	14.37	0.53
	13.8	15.95
	15.59	0.39
	3.62	0.94
	14.88	15.37
	3.04	0.51
	21.37	0
	47.08	0
	1.26	11.19
	0	1
	0.85	0.48
	7.77	0.62
	10.97	0.06
	58.33	0
	45.16	0.09
	14.42	0
	37.61	0.06
	8.28	2.46
	241.34	0
	47.34	3.33
	0.82	0.25
	78.05	0.07
	0.31	98.67
	45.9	0.17
	5.98	2.44
	2.06	0.12
	47.19	0.03
	12.69	3.94
	19.34	4.29
	0.63	0.05
	29.27	0
	11.91	1.23
	2.45	0
	44.67	0
	5.51	0
	0.1	11.33
	1.31	25.66
	1.91	10.42
	73.54	0
	36.97	0.25
	4.91	0.06
	0.18	0
	7.3	0
	31.74	31.1
	4.46	50.2
	3.01	0
	1.72	0
	16.55	0
	0.2	0.17
	3.33	0
	6.97	29.9
	2.5	0.08
	73.95	0.06
	9.79	0
	13.64	0.03
	10.88	0.55
	3.39	3.22
	16.04	8.93
	3.03	0.13
	3.29	4.4
	19.04	3.92
	27.55	7.91
	8.02	0
	233.68	0.1
	1.15	7.87
	0.61	11.19
	26.22	0
	0.02	0
	0.35	6.56
	1.52	6.92
	0.51	0
	11.09	0.03
	0.51	0.6
	40.49	43.61
	40.47	0.45
	409.09	0.13
	2.45	7.07
	10.78	7
	59.87	1.87
	17.74	0.68
	18.8	0.12
	47.42	4.52
	0.72	0
	53.6	0.35
	152.04	5.45
	25.05	0.56
	21.27	7.87
	76.76	0.13
	1.16	0.1
	39.05	0.22
	2.72	3.26
	4.25	8.47
	9.76	0
	0.78	0
	41.41	0.33
	169.38	6
	19.61	0.43
	5.45	0.08
	1.72	158.28
	34.44	0.28
	2.94	0.41
	2.3	0.27
	1.94	1.26
	3.02	0.02
	0.37	6.34
	0.92	0.03
	29.78	0.08
	0.5	0.12
	75.94	0.09
	41.14	51.01
	2.44	0.31
	1.41	0.03
	46.31	0.09
	9.51	4.29
	99.65	0
	1.36	21.71
	19.8	0
	0.45	0
	0.24	17.2
	3.44	0.1
	0.53	0
	21.3	1.8
	6.5	1.36
	117.39	0
	26.13	0
	10.01	0.48
	29.74	0.44
	108.95	0
	44.93	0
	1.4	0.4
	6.71	0
	6.16	0
	3.94	0
	22.72	0
	9.16	7.34
	191.56	0.21
	44.26	0.36
	7.18	1.68
	62.17	3.44
	0.24	0.77
	14.1	0
	28.34	0
	12.09	0.12
	16.97	0
	21.21	0.01
	0.2	2.89
	165.64	4.51
	1.9	0.3
	2	0
	34.48	0.29
	1.5	0
	151.17	0
	0.48	0.55
	12.92	0.53
	9.9	1.77
	101.56	0
	6.45	0.07
	7.47	0.09
	25.4	0.05
	19.67	0.1
	5.9	8.29
	5.84	0.66
	0.05	56.69
	0.51	5.1
	2.67	0.25
	83.76	0
	18.48	4.17
	0.24	1.46
	12.18	0.03
	43.08	0.16
	64.15	0.17
	1.18	0.18
	35.02	59.94
	0.31	0
	0.32	0
	8.93	0.16
	1.21	0
	1.88	65.25
	13.08	2.08
	0.6	5.51
	35.8	0.04
	0.78	1.04
	2.23	0.41
	56.85	0
	25.96	0.77
	11.29	0
	2.87	0.05
	43.19	151.41
	8.64	0
	12.62	3.98
	23.24	0.03
	8.38	0
	16.89	0.29
	4.38	4.63
	28.03	1.09
	1.67	0.23
	2.28	2.34
	3.23	0.34
	0	0.11
	1.69	6.04
	1.18	0
	12.61	0.34
	30.16	6.82
	6.1	2.86
	9.26	0.58
	6.86	0.16
	0.19	0.86
	4.5	0.53
	0.78	5.65
	9.13	14.47
	2.59	5.36
	4.03	0.25
	16.55	0
	0	0.6
	56.21	0
	0.03	0.34
	22.19	0.22
	20.95	0.27
	19.18	0
	1.79	0.1
	0	0
	30.91	0
	6.19	0.35
	0.72	0
	2.85	5.4
	14.93	1.4
	11.7	0.05
	21.74	3.61
	38.7	0
	6.71	1.44
	2.4	0.07
	0.58	11.25
	14.66	2.2
	27.33	0
	0.61	0.48
	24.93	0
	2.97	44.54
	39.6	14.84
	12.04	0
	32.26	0.03
	1.52	0.06
	2.57	0
	13.44	0.47
	1.61	28.91
	32.67	0
	2.19	270.18
	3.17	0.12
	34.9	0
	2.32	2.21
	0.49	0.03
	3.28	1.82
	13	0.46
	1.15	0
	0.01	0.08
	0	0.02
	0	3.88
	3.04	0
	2.46	0.29
	30.83	0.59
	5.6	0.16
	7.99	2.49
	0.16	0
	3.34	0.14
	93.66	0
	15.81	2.62
	1.19	0.03
	20.75	0
	0.08	0
	6.83	0.26
	102.2	0.75
	0.92	0.05
	7.02	0
	0.77	0.55
	38.77	6.04
	198.43	0
	8.53	0.18
	0.87	0.13
	5.85	0.98
	16.3	1.43
	17.42	0.37
	3.33	43.67
	22.35	0.2
	2.86	0.23
	7.94	0
	0.25	0
	18.13	0.03
	75.72	0.24
	37.49	25.16
	17.29	0
	7.71	1.29
	3.37	0.11
	49.73	0.79
	3.27	24.23
	36.03	0.16
	0.43	0
	0.34	20.28
	3.9	0.16
	3.99	0.15
	2.28	6.85
	20.39	0
	7.25	0.09
	13.26	10.02
	0	0.09
	68.59	1.11
	32.81	0
	2.61	1.3
	11.77	0
	21.58	0
	2.11	2.81
	21.65	0.34
	0.66	0
	0	18.75
	39.31	1.05
	5.05	6.02
	54.77	0
	0.97	0.04
	33.79	0.07
	31.06	0.06
	0.19	0
	18.05	0.11
	100.17	0.2
	21.28	1.23
	8.04	0.47
	22.66	8.33
	1.94	0
	4.06	0.29
	11.05	0
	0.06	4.48
	21.19	0.48
	3.26	0.31
	53.74	0.31
	14.09	0.46
	9.86	0.28
	15.87	0.12
	4.16	0.05
	4.92	0.4
	0	0.07
	0.53	0.55
	11.36	0.78
	0.34	0.15
	0.5	1.64
	4.34	0
	35.93	1.47
	55.79	0.04
	94.89	0.02
	88.68	0
	46.79	0.03
	8.23	0
	184.96	0.18
	2.95	0
	2.11	8.08
	9.99	1.02
	3.81	4.1
	4.7	52.07
	3.27	0.23
	20.3	0.2
	70.11	0.37
	2.03	0.05
	3.29	0.03
	34.58	4.81
	59.41	0
	4.82	0.05
	8.31	6.94
	2.5	12.14
	0.1	1.62
	2.9	0.71
	1.91	11.93
	0	0
	2.27	36.17
	0.63	2.27
	0	0.45
	44.2	0.79
	1.59	0.09
	3.65	1.96
	1.96	0
	12.4	8.08
	3.61	1.27
	0.37	1.31
	5.76	9.64
	0.14	20.48
	6.59	0
	14.51	0.04
	1.23	0
	15.99	0.72
	2.46	3.66
	39.58	0
	1.12	0
	6.23	0.53
	26.13	0.47
	99.09	1.57
	3.09	0
	4.33	0.15
	0.53	0.13
	2.37	0.23
	0.08	2.26
	4.4	0.06
	26.87	0.07
	64.36	0
	20.51	3.41
	84.54	0.22
	11.05	0.06
	1.11	5.55
	31.39	0.22
	0.03	0
	1.86	0
	32.05	0.22
	9.52	2.53
	0.22	1.71
	1.71	2.7
	1.18	0
	20.71	0
	209	0
	0.27	5.58
	6.46	16.93
	20.62	0
	6.41	0
	15.9	5.2
	5.62	0
	9.68	0.46
	0.16	29.5
	41.8	11.91
	0.29	24.45
	8.3	0.42
	38.99	0
	56.8	0.33
	2.65	0.94
	2.59	0.17
	1.29	0.17
	4.53	0
	30.48	17.7
	0.54	0.52
	2.17	6.18
	2.37	0
	4.04	0.22
	7.5	0
	2.76	0
	5.81	0
	0.22	33.09
	39.3	0
	7.16	5.34
	0.13	0.24
	5.86	0
	0	0.11
	0.12	2
	9.8	1.72
	7.91	0.05
	17.9	17.43
	0.54	2.41
	12.68	0.28
	1.41	0.09
	15.91	11.92
	19.8	0
	0.48	1.06
	17.24	0.04
	15.13	0
	12.41	0.22
	0.81	0
	10.03	0
	0.89	0.3
	0.01	0
	11.37	0.07
	1	0
	3.81	3.14
	35.42	2.29
	30.09	0
	5.32	0
	10.27	0.82
	54.33	0.51
	31.92	0
	1.23	0
	0	0
	11.95	0
	14.88	0
	1.96	0
	47.92	0.17
	1.11	0.59
	0.66	1.04
	1.18	0.97
	4.15	0
	27.91	0.37
[truncated: 6,860 more rows]
